# Supplementary material for: GRF5 mediates circadian clock to gate seed quality in soybean
Source: Research Square preprint supplement (doi:10.21203/rs.3.rs-5535877/v1), 2025-03-05
Supplement: Supplementary file 1 [file 1237849d6432110c874ea461.xlsx]

## Sheet: Sheet1
Gene Name in Arabidopsis	ID in soybean	Name in soybean in this study
Clock genes
CCA1, LHY	Glyma.03G261800	GmLHY2b
CCA1, LHY	Glyma.19G260900	GmLHY2a
CCA1, LHY	Glyma.16G017400	GmLHY1a
CCA1, LHY	Glyma.07G048500	GmLHY1b
TOC1a	Glyma.04G166300	GmTOC1-1
TOC1b	Glyma.06G196200	GmTOC1-2
TOC1c	Glyma.17G102200	GmTOC1-3
TOC1d	Glyma.05G025000	GmTOC1-4
ELF3	Glyma.04G050200	GmELF3a, J
ELF3	Glyma.17G231600	GmELF3b-2
ELF3	Glyma.14G091900	GmELF3b-1
ELF4	Glyma.18G027500	GmELF4a
ELF4	Glyma.11G229700	GmELF4b
BOA, LUX, PCL1	Glyma.12G060200	GmLUX1
BOA, LUX, PCL1	Glyma.11G136600	GmLUX2
PRR3, PRR7	Glyma.10G048100	PRR7a
PRR3, PRR7	Glyma.12G073900	PRR7b
PRR3, PRR7	Glyma.13G135900	PRR7c
PRR9, PRR5	Glyma.04G228300	PRR5a
PRR9, PRR6	Glyma.07G049400	PRR5b
PRR5	Glyma.06G136600	PRR9a
PRR9	Glyma.03G261300	PRR9b
GI1	Glyma.10G221500
GI3	Glyma.20G170000
GI2	Glyma.16G163200
FIO1	Glyma.05G133200
FIO1	Glyma.08G087700
FKF1, LKP2, ZTL	Glyma.05G239400
FKF1, LKP2, ZTL	Glyma.13G097600
FKF1, LKP2, ZTL	Glyma.09G056100
FKF1, LKP2, ZTL	Glyma.17G062000
FKF1, LKP2, ZTL	Glyma.15G162300
PRMT5	Glyma.04G074200
TCP21, CHE	Glyma.20G001600
TEJ	Glyma.11G010700
TIC	Glyma.10G249300
TIC	Glyma.20G144400
XAP5	Glyma.08G042200
XAP5	Glyma.05G234700
CIR1, RVE2, RVE1, RVE7	Glyma.09G167900
CIR1, RVE2, RVE1, RVE7	Glyma.16G217700
CIR1, RVE2, RVE1, RVE7	Glyma.14G210600
CIR1, RVE2, RVE1, RVE7	Glyma.02G241000
CIR1, RVE2, RVE1, RVE7	Glyma.18G044200
RVE3, RVE5, RVE6	Glyma.20G162800
RVE3, RVE5, RVE7	Glyma.16G032600
RVE3, RVE5, RVE8	Glyma.10G230700
RVE3, RVE5, RVE10	Glyma.07G066100
RVE3, RVE5, RVE11	Glyma.18G237700
RVE3, RVE5, RVE12	Glyma.16G178700
RVE4, RVE8	Glyma.10G048500
RVE4, RVE8	Glyma.19G178000
RVE4, RVE8	Glyma.13G136300
RVE4, RVE8	Glyma.03G177300
CKB4	Glyma.01G203800
CKB4	Glyma.05G067300
CKB4	Glyma.11G039100
CKB4	Glyma.17G149500
COR27, COR28	Glyma.14G083000
COR27, COR28	Glyma.17G242100
COR27, COR28	Glyma.07G213000
HOS1	Glyma.01G207400
HOS1	Glyma.11G035800
JMJD5	Glyma.11G130600
JMJD5	Glyma.12G055000
LNK1	Glyma.08G073300
LNK1	Glyma.05G118300
LNK1	Glyma.08G179400
LNK2	Glyma.11G154700
LNK2	Glyma.04G141400
LNK2	Glyma.15G237600
LNK2	Glyma.13G199300
LNK3, LNK4	Glyma.13G191900
LNK3, LNK4	Glyma.11G158200
LNK3, LNK4	Glyma.15G229400
LNK3, LNK4	Glyma.04G133400
LWD1, LWD2	Glyma.19G106900
LWD1, LWD3	Glyma.16G044800
CRY2	Glyma.20G209900
CRY2	Glyma.10G180600
CRY2	Glyma.02G005700
CRY1a	Glyma.04G101500
CRY1b	Glyma.06G103200
CRY1c	Glyma.13G089200
CRY1d	Glyma.14G174200
CRY1e	Glyma.08G209600
CRY3	Glyma.04G074500
CRY3	Glyma.10G017900
CRY3	Glyma.02G017500
PHY1	Glyma.20G090000	PhyA1
PHY2	Glyma.10G141400	PhyA2
PHY3	Glyma.19G224200	PhyA3
PHY4	Glyma.15G140000
PHY5	Glyma.09G035500
PHY6	Glyma.09G088500
PHY7	Glyma.03G227333
PHY8	Glyma.03G227267
PHY9	Glyma.09G002600
PHY10	Glyma.02G087000
Protein and oil synthesis genes
GmGRF5a	Glyma.07G038400.1	GmGRF5a
GmGRF5b	Glyma.16G007600	GmGRF5b
Cupin1-1	Glyma.20G146200	Cupin1-1
Cupin1-5	Glyma.10G246300	Cupin1-5
GmCupin1-7	Glyma.20G146300
GmCupin1-8	Glyma.10G246400
GmGlobulin1-2	Glyma.15G043300.2
GmGlobulin1-5	Glyma.03G030500.1
GmKCS5	Glyma.10G274400	GmKCS5
GmMGD1	Glyma.02G249300	GmMGD1
GmOMT1a	Glyma.11G133800	GmOMT1a
GmPEX16	Glyma.07G080200	GmPEX16
GmPXA1	Glyma.11G239800	GmPXA1
GmRPS4	Glyma.16G127500	GmRPS4
GmWRI1a	Glyma.15G221600	GmWRI1a
TPA10/2S albumin	Glyma.10G297600	GmTPA10
LEC1	Glyma.20G000600
LEC1	Glyma.17G005600
LEC1	Glyma.07G268100
ABI5	Glyma.19G194500
ABI5	Glyma.10G071700
ABI5	Glyma.13G153200
ABI3	Glyma.18G176100
ABI3	Glyma.08G357600
PEI1	Glyma.09G102900
PEI1	Glyma.14G016300
TTG1	Glyma.04G228000
TTG1	Glyma.06G136900
TuODORANT1	Glyma.11G215800
TuODORANT1	Glyma.14G214500
TuODORANT1	Glyma.18G040700
TuODORANT1	Glyma.02G244600
GmPV72b	Glyma.11G001500
GmPV72b	Glyma.01G242800
GmSWEET39	Glyma.15G049200
GmSWEET39	Glyma.08G183500
GmGOGAT2	Glyma.04G236900	GmGOGAT2
GmGOGAT2	Glyma.06G127400
GmILR3	Glyma.06G266800
TTG1	Glyma.06G136900
PPA1	Glyma.11G070800
PPA1	Glyma.07G048300
PPA1	Glyma.16G017200
PPA1	Glyma.03G262000
PPA1	Glyma.19G261100
GmPPC2	Glyma.12G229400
GmPPC2	Glyma.13G270400
PEI1	Glyma.09G102900
PEI1	Glyma.14G016300
GmOMT1a	Glyma.11G133800	GmOMT1a
GmOMT2a	Glyma.12G058000
FUS3	Glyma.19G100900
FUS3	Glyma.16G050300
GmMYC3-1	Glyma.09G204500	GmMYC3-1
GmMYC3-2	Glyma.01G018400	GmMYC3-2
GmMYC3-3	Glyma.16G090900	GmMYC3-3
GmMYC3-4	Glyma.01G096600	GmMYC3-4
GmMYC3-5	Glyma.08G271900	GmMYC3-5
WRI1	Glyma.15G221600	GmWRI1a
WRI1	Glyma.08G227700	GmWRI1b
GmCGI-58	Glyma.04G026500	GmCGI-58a
GmCGI-58	Glyma.14G216800	GmCGI-58b
GmSEIPIN	Glyma.18G242100
GmSEIPIN	Glyma.09G250400
OLE1	Glyma.10G193900	GmOLE1a
OLE1	Glyma.20G196600
OLE1	Glyma.19G063400	GmOLE1c
GmFAD2	Glyma.10G278000
GmFAD2	Glyma.20G111000	GmFAD2-1B
GmFAD2	Glyma.03G144500
GmFAD2	Glyma.19G147400
MYB89	Glyma.07G228700
MYB89	Glyma.01G049600
MYB89	Glyma.20G034100
MYB89	Glyma.02G108800
GmGPDH	Glyma.02G218700
GmGPDH	Glyma.19G053500
GmDGAT	Glyma.09G065300	GmDGAT1a
GmDGAT	Glyma.13G106100
GmDGAT	Glyma.17G053300
Reference genes
PP2A	Glyma.02G097600	GmPP2A
UNK2	Glyma.06G038500	GmUNK2

## Sheet: Sheet2
CKB4	Glyma.01G203800
HOS1	Glyma.01G207400
CRY2	Glyma.02G005700
CRY3	Glyma.02G017500
PHY	Glyma.02G087000
CIR1, RVE2, RVE1, RVE7	Glyma.02G241000
RVE4, RVE8	Glyma.03G177300
PHY	Glyma.03G227267
PHY	Glyma.03G227333
PRR9, PRR9	Glyma.03G261300
CCA1, LHY	Glyma.03G261800	GmLHY2b
ELF3	Glyma.04G050200	GmELF3a
PRMT5	Glyma.04G074200
CRY3	Glyma.04G074500
CRY1	Glyma.04G101500
LNK3, LNK4	Glyma.04G133400
LNK2	Glyma.04G141400
TOC1	Glyma.04G166300	GmTOC1-1
PRR9, PRR5	Glyma.04G228300
TOC1	Glyma.05G025000	GmTOC1-4
CKB4	Glyma.05G067300
LNK1	Glyma.05G118300
FIO1	Glyma.05G133200
XAP5	Glyma.05G234700
FKF1, LKP2, ZTL	Glyma.05G239400
CRY1	Glyma.06G103200
PRR9, PRR7	Glyma.06G136600
TOC1	Glyma.06G196200	GmTOC1-2
CCA1, LHY	Glyma.07G048500	GmLHY1b
PRR9, PRR6	Glyma.07G049400
RVE3, RVE5, RVE8	Glyma.07G066100
COR27, COR28	Glyma.07G213000
XAP5	Glyma.08G042200
LNK1	Glyma.08G073300
FIO1	Glyma.08G087700
LNK1	Glyma.08G179400
CRY1	Glyma.08G209600
PHY	Glyma.09G002600
PHY	Glyma.09G035500
FKF1, LKP2, ZTL	Glyma.09G056100
PHY	Glyma.09G088500
CIR1, RVE2, RVE1, RVE7	Glyma.09G167900
CRY3	Glyma.10G017900
PRR3, PRR7	Glyma.10G048100
RVE4, RVE8	Glyma.10G048500
PHY	Glyma.10G141400
CRY2	Glyma.10G180600
GI	Glyma.10G221500
RVE3, RVE5, RVE8	Glyma.10G230700
TIC	Glyma.10G249300
TEJ	Glyma.11G010700
HOS1	Glyma.11G035800
CKB4	Glyma.11G039100
JMJD5	Glyma.11G130600
BOA, LUX, PCL1	Glyma.11G136600	GmLUX2
LNK2	Glyma.11G154700
LNK3, LNK4	Glyma.11G158200
ELF4	Glyma.11G229700	GmELF4b
JMJD5	Glyma.12G055000
BOA, LUX, PCL1	Glyma.12G060200	GmLUX1
CRY1	Glyma.13G089200
FKF1, LKP2, ZTL	Glyma.13G097600
PRR3, PRR7	Glyma.13G135900
RVE4, RVE8	Glyma.13G136300
LNK3, LNK4	Glyma.13G191900
LNK2	Glyma.13G199300
COR27, COR28	Glyma.14G083000
ELF3	Glyma.14G091900	GmELF3b-1
CRY1	Glyma.14G174200
CIR1, RVE2, RVE1, RVE7	Glyma.14G210600
PHY	Glyma.15G140000
FKF1, LKP2, ZTL	Glyma.15G162300
LNK3, LNK4	Glyma.15G229400
LNK2	Glyma.15G237600
CCA1, LHY	Glyma.16G017400	GmLHY1a
RVE3, RVE5, RVE7	Glyma.16G032600
LWD1, LWD3	Glyma.16G044800
GI	Glyma.16G163200
RVE3, RVE5, RVE12	Glyma.16G178700
CIR1, RVE2, RVE1, RVE7	Glyma.16G217700
FKF1, LKP2, ZTL	Glyma.17G062000
TOC1	Glyma.17G102200	GmTOC1-3
CKB4	Glyma.17G149500
ELF3	Glyma.17G231600	GmELF3b-2
COR27, COR28	Glyma.17G242100
ELF4	Glyma.18G027500	GmELF4a
CIR1, RVE2, RVE1, RVE7	Glyma.18G044200
RVE3, RVE5, RVE11	Glyma.18G237700
LWD1, LWD2	Glyma.19G106900
RVE4, RVE8	Glyma.19G178000
PHY	Glyma.19G224200
CCA1, LHY	Glyma.19G260900	GmLHY2a
TCP21, CHE	Glyma.20G001600
PHY	Glyma.20G090000
TIC	Glyma.20G144400
RVE3, RVE5, RVE6	Glyma.20G162800
GI	Glyma.20G170000
CRY2	Glyma.20G209900
