# Supplementary material for: GRF5 mediates circadian clock to gate seed quality in soybean
Source: Research Square preprint supplement (doi:10.21203/rs.3.rs-5535877/v1), 2025-03-05
Supplement: Supplementary file 2 [file 196f2e4d9d72deae68c53c23.xlsx]

## Sheet: Gene expression
Table S5a The operation of circadian clocks in soybean pod walls and seeds
GeneID	label	Description	seed-OG-10-0	seed-W82-0	seed-grf5-0	seed-OG-10-4	seed-W82-4	seed-grf5-4	seed-OG-10-8	seed-W82-8	seed-grf5-8	seed-OG-10-12	seed-W82-12	seed-grf5-12	seed-OG-10-16	seed-W82-16	seed-grf5-16	seed-OG-10-20	seed-W82-20	seed-grf5-20	pod-OG-10-0	pod-W82-0	pod-grf5-0	pod-OG-10-4	pod-W82-4	pod-grf5-4	pod-OG-10-8	pod-W82-8	pod-grf5-8	pod-OG-10-12	pod-W82-12	pod-grf5-12	pod-OG-10-16	pod-W82-16	pod-grf5-16	pod-OG-10-20	pod-W82-20	pod-grf5-20
Glyma.06G118550		2,4,6-trihydroxybenzophenone synthase / Benzophenone synthase	0	0	0	0	0	0	0	0	0.03	0	0	0	0	0	0	0	0	0	11.7733	10.2367	13.28	14.0567	20.27	18.42	15.34	39.0567	10.0067	17.45	23.31	26.8467	12.0333	14.07	10.44	3.16333	8.22	11.9067
Glyma.05G104600	CK2A	CASEIN KINASE II SUBUNIT ALPHA // CASEIN KINASE II SUBUNIT ALPHA, CHLOROPLASTIC	16.9267	18.8633	19.5367	15.1833	16.99	21.7233	13.78	13.35	19.6333	14.17	17.5967	15.8033	14.3833	18.1133	15.67	11.2567	13.19	14.6867	28	27.0467	32.2167	22.2733	23.6033	19.0533	26.0733	38.5867	27.0067	30.13	36.6767	30.0933	23.6367	26.4067	35.35	26.4167	25.7733	30.2567
Glyma.17G161800	CK2A	Casein kinase II, alpha subunit	10.0933	12.0967	11.0933	10.8067	11.0733	14.05	9.17	7.97667	12.82	9.69333	11.6333	11.07	11.58	11.5967	12.2967	9	10.0767	10.7633	18.9533	18.7767	17.1633	16.13	16.3433	16.55	22.9667	23.23	19.5633	21.8267	25.1567	21.5367	17.54	21.37	23.3967	21.2967	20.5433	21.09
Glyma.10G221500	GI	GIGANTEA (GI)	7.94333	11.44	9.78333	11.4633	15.12	15.3267	5.02333	5.57	7.07333	7.89667	9.63667	8.81667	11.2267	11.19	8.97	8.02333	7.87333	7.68667	56.4367	54.57	47.73	33.9633	31.09	23.6133	56.59	56.52	54.55	56.9	61.6367	54.5933	50.6667	53.64	41.0133	38.4533	53.6467	56.1667
Glyma.16G163200	GI	GIGANTEA (GI)	4.57	7.18	6.48333	7.01333	8.67	9.80333	2.81333	3.54333	4.54333	4.48667	5.93333	5.46333	8.01333	7	5.23	4.30333	4.2	5.04	31.2333	27.1633	26.8933	18.4433	18.76	17.35	27.3167	29.5733	31.8667	32.1	34.2733	35.7433	30.5633	34.4267	24.53	22.3667	32.1633	31.1367
Glyma.20G170000	GI	GIGANTEA (GI)	8.25667	10.01	9.22	10.15	12.6867	13.6433	5.41333	4.61333	7.04	7.12333	9.46333	8.02333	10.0833	11.4567	8.46	7.25	8.25667	7.75667	38.63	39.59	35.8467	22.87	23.74	15.36	40.4533	57.3367	43.0267	49.65	65.44	45.1	36.41	47.0667	37.4167	28.2433	46.9333	45.3933
Glyma.03G261800	LHY	MYB-related transcription factor LHY (LHY)	1.20333	1.70333	0.913333	1.22667	1.80333	1.47	0.613333	0.97	0.84	0.49	0.946667	0.736667	0.96	1.24667	0.61	0.706667	0.833333	0.676667	11.4033	19.85	17.7167	11.1933	13.7167	6.43	19.4967	13.29	8.14	7.76667	12.2633	5.71	6.26	9.71	12.4167	12.2833	9.48	11.0933
Glyma.07G048500	LHY	MYB-related transcription factor LHY (LHY)	3.06667	3.81333	1.61	4.5	3.27667	4.07667	2.95333	2.01667	1.81	2.5	2.36333	2.24333	4.33333	2.90667	2.09	3.38667	2.92667	1.65667	24.81	38.63	16.7633	22.6467	21.1767	9.37333	41.0233	24.5767	19.4433	30.02	32.1533	19.3	23.48	26.6633	28.6633	35.4167	25.9667	26.1467
Glyma.16G017400	LHY	MYB-related transcription factor LHY (LHY)	8.32	11.14	9.66	10.6133	12.42	14.2167	7.02	8.41333	7.18	6.43667	7.91	7.47333	8.90333	10.4267	8.22	7.88333	9.33333	7.81667	55.82	80.2567	77.5933	66.3633	81.6933	47.8567	108.19	88.8033	69.9933	74.0367	91	63.5667	44.7567	58.4167	57.9	91.97	71.6567	81.9467
Glyma.19G260900	LHY	MYB-related transcription factor LHY (LHY)	2.19667	2.31	1.93	2.76	3.23667	2.81333	1.57	1.73333	1.56	1.63667	1.86667	1.60333	1.66	2.43	1.57	1.62333	1.78	1.5	17.2067	25.09	25.1767	17.7333	22.8067	11.4667	23.8833	24.5133	15.6333	14.7933	23.7333	13.5767	13.3067	15.56	17.8667	17.0667	14.6867	20.57
Glyma.01G091400	CHS	Naringenin-chalcone synthase / Flavonone synthase	0	0	0	0.0133333	0	0	0	0	0	0	0	0	0	0	0	0	0	0	0.186667	0	0.0366667	0.0466667	0.0966667	0.58	0.0166667	0	0	0	0.0133333	0.24	0.26	0.0666667	0	0	0	0.03
Glyma.01G228700	CHS	Naringenin-chalcone synthase / Flavonone synthase	17.0767	12.8467	14.4833	13.3833	11.4367	18.01	12.63	15.3867	19.4833	11.5767	16.2867	12.9433	11.4567	14.2067	12.2667	10.6333	13.1233	12.1933	14.67	22.24	19.3367	9.56	10.4167	29.1	10.9433	8.41667	11.7533	14.14	8.37	21.1033	25.75	10.7767	9.14667	7.17	9.53333	8.43333
Glyma.02G130400	CHS	Naringenin-chalcone synthase / Flavonone synthase	0	0	0	0	0	0	0	0	0	0	0	0	0	0	0	0	0	0	0.713333	1.09667	1.75	1.11	2.08667	6.88	1.42333	1.74333	2.45333	1.47	0.783333	2.50667	2.88	0.833333	1.47667	1.58333	2.04333	2.34
Glyma.05G153200	CHS	Naringenin-chalcone synthase / Flavonone synthase	7.41667	5.61333	4.79	7.62	6.27333	5.56333	5.12333	6.93667	5.53	4.34	4.50667	4.34	4.71	4.89	4.73667	5.16667	5.85	4.56667	2.45	3.12667	1.36667	2.87667	3.42667	4.65	1.49	1.62	1.69667	2.46333	1.77	2.76333	2.18	1.75	1.41	1.99667	1.96667	2.19333
Glyma.08G109200	CHS	Naringenin-chalcone synthase / Flavonone synthase	0	0.02	0	0.03	0	0.0433333	0.12	0	0	0.02	0	0	0	0	0	0.0933333	0	0	0.956667	1.09333	1.09	0	1.39	9.64	0.1	0	1.24	0	0.476667	1.15667	1.69333	0	0.613333	0	0.906667	1.46667
Glyma.08G109300	CHS	Naringenin-chalcone synthase / Flavonone synthase	0.08	0.133333	0.0266667	0.2	0.143333	0.2	0.12	0.106667	0.156667	0.1	0.0966667	0.113333	0.2	0.3	0.146667	0.16	0.106667	0.133333	0.143333	0.26	0.22	0.316667	0.3	0.27	0.183333	0.3	0.146667	0.183333	0.213333	0.323333	0.196667	0.23	0.18	0.0833333	0.133333	0.133333
Glyma.08G109400	CHS	Naringenin-chalcone synthase / Flavonone synthase	0.0466667	0.116667	0.0833333	0.08	0.456667	0.313333	0.103333	0.176667	0.0966667	0.0766667	0.0933333	0.21	0.253333	0.266667	0.203333	0.186667	0.0666667	0.0733333	4.96333	8.91333	3.85333	1.03333	5.70667	10.1267	4.52	1.08667	0.926667	1.32	8.61	2.83333	6.4	2.69333	0.663333	2.25	8.23	1.19
Glyma.08G109500	CHS	Naringenin-chalcone synthase / Flavonone synthase	0.176667	0.0933333	0.11	0.323333	0.243333	0.77	0.0866667	0.163333	0.0733333	0.163333	0.18	0.26	0.183333	0.146667	0.0933333	0.196667	0.15	0.206667	6.83667	18.2	24.2733	8.94667	27.8967	26.2167	2.99667	9.85333	8.73333	4.47	10.87	14.3933	19.8167	4.60667	9.84	6.51333	12.8133	15.0633
Glyma.08G110300	CHS	Naringenin-chalcone synthase / Flavonone synthase	0.03	0	0.03	0	0.126667	0	0.17	0.00666667	0.0133333	0.0233333	0.0833333	0	0	0.0633333	0.0433333	0.04	0	0.0266667	0.0533333	0.0933333	0.31	0.203333	0.576667	0.32	0.133333	0.1	0.0533333	0.433333	0.206667	0.226667	0.233333	0.02	0.266667	0.06	0	0.27
Glyma.08G110420	CHS	Naringenin-chalcone synthase / Flavonone synthase	0	0	0	0.136667	0	0	0	0	0	0	0	0	0	0	0	0	0	0	0	0	0	1.70333	0	0	0	0	0	0	0	0	0	0	0.883333	0	0	0
Glyma.08G110460	CHS	Naringenin-chalcone synthase / Flavonone synthase	0.11	0.133333	0.08	0.0566667	0	0.0433333	0	0.03	0	0.156667	0	0.03	0.233333	0	0.0933333	0.0266667	0.263333	0.06	1.65333	2.65667	0.896667	0.623333	2.17	11.7667	0.37	0.603333	0.8	0.756667	0.77	1.19	3.53333	0.5	0.09	0.586667	1.02333	0.433333
Glyma.08G110500	CHS	Naringenin-chalcone synthase / Flavonone synthase	0.243333	0.146667	0.316667	0.08	0.253333	0.273333	0.08	0.23	0.246667	0.123333	0.146667	0.196667	0.203333	0.0666667	0.376667	0.316667	0.123333	0.22	0.686667	1.04667	0.86	1.43	1.24667	2.96667	0.956667	0.59	0.273333	0.54	0.526667	2.99	1.95333	0.776667	0.263333	0.85	0.473333	0.436667
Glyma.09G075200	CHS	Naringenin-chalcone synthase / Flavonone synthase	0	0	0	0	0	0	0	0	0	0	0	0	0	0	0	0	0	0	0.236667	0.363333	0.116667	0.303333	0.616667	0.496667	0	0.08	0.17	0.05	0.0166667	0.06	0.333333	0.29	0.0166667	0.0166667	0.0466667	0.133333
Glyma.11G011500	CHS	Naringenin-chalcone synthase / Flavonone synthase	2.31	2.37333	1.79	2.22	2.23	2.47	1.66	3.59667	2.74	1.3	2.49333	1.66	2.3	2.50667	1.87333	1.57	2.02	1.75	5.76667	8.93	6.42	5.26333	7.08333	11.89	2.44	2.8	2.17	3.89667	2.77	6.39	11.5667	4.51	2.49667	1.64333	2.44	1.66333
Glyma.19G105100	CHS	Naringenin-chalcone synthase / Flavonone synthase	8.06333	10.54	9.51	6.48333	5.93667	12.9467	6.37667	5.83667	10.47	5.85667	8.33333	6.33667	9.21	8.39	9.12	6.18	3.71333	5.75	15.7233	8.69667	12.4167	13.4733	8.77667	12.2633	13.88	6	8.42	7.98333	5.40667	6.77667	4.49	5.16333	3.35667	10.54	6.88333	8.01333
Glyma.10G048100	PRR3	RESPONSE REGULATOR OF TWO-COMPONENT SYSTEM // SUBFAMILY NOT NAMED // TWO-COMPONENT RESPONSE REGULATOR-LIKE PRR3	14.1367	17.7	18.2367	17.3967	17.3067	28.8267	11.42	8.62333	15.9767	13.11	16.12	15.17	20.0533	18.8267	17.33	13.5833	13.3	14.67	42.6	41.5533	46.49	29.19	27.82	24.92	52.7167	63.8567	51.0067	52.7233	63.9767	54.72	42.6833	43.9367	44.1133	40.85	44.13	55.0733
Glyma.13G135900	PRR3	RESPONSE REGULATOR OF TWO-COMPONENT SYSTEM // SUBFAMILY NOT NAMED // TWO-COMPONENT RESPONSE REGULATOR-LIKE PRR3	11.07	13.18	13.7433	14.3067	14.1567	20.4467	8.83333	7.39	11.8667	11.37	12.14	11.91	15.19	15.7567	14.0033	11.04	11.9067	12.46	37.1167	36.3233	40.3333	22.4833	19.6933	18.2367	39.7167	47.27	40.6667	41.29	49.35	47.1233	33.84	40.1967	39.29	33.63	41.43	46.6667
Glyma.11G148362	PRR3	RESPONSE REGULATOR OF TWO-COMPONENT SYSTEM // TWO-COMPONENT RESPONSE REGULATOR-LIKE PRR3	4.43333	5.23333	5.19333	4.57667	6.52333	7.15	4.31	2.68333	4.88667	4.58333	6.24667	4.27333	6.62333	8.05333	4.85	4.96	5.68333	3.66333	10.15	11.7667	9.72333	6.41333	6.5	4.81333	24.19	16.08	18.5233	19.1367	18.72	19.17	14.02	17.2267	15.01	13.86	17.1733	13.6833
Glyma.12G073900	PRR3	RESPONSE REGULATOR OF TWO-COMPONENT SYSTEM // TWO-COMPONENT RESPONSE REGULATOR-LIKE PRR3	13.6767	12.4767	10.9667	12.2833	15.3767	15.4967	10.79	6.31333	11.3933	11.3167	14.1967	10.09	14.97	17.6833	11.73	12.8767	15.5633	9.31667	17.46	18.5267	22.2867	14.17	11.9733	10.18	44.6433	38.29	32.7967	36.3933	37.24	39.85	22.5333	25.0633	25.8033	20.8067	29.1533	31.4867
Glyma.14G049700	WD40	WD40 REPEAT PROTEIN // E3 UBIQUITIN-PROTEIN LIGASE RFWD2	8.41333	9.63333	8.89333	10.75	10.6	10.83	7.67	6.33667	9.11333	8.89667	9.71667	8.46667	9.89	11.2633	8.47667	8.66667	9.72	7.76667	10.0067	10.4267	10.16	7.30667	7.02	4.74667	11.3133	9.98667	7.16	7.67667	11.32	6.05667	7.63333	9.06667	8.76667	8.97667	7.19333	7.09667
Glyma.02G267800	WD40	WD40 REPEAT PROTEIN // PROTEIN SUPPRESSOR OF PHYA-105 1 // E3 UBIQUITIN-PROTEIN LIGASE RFWD2	5.64333	5.19333	5.30333	5.48333	6.07667	6.37	4.99	4.36	5.70667	5.51	6.33667	4.84333	5.47	6.47	5.19667	4.86667	5.88	4.62667	5.74667	6.47	6.67333	4.84333	4.46	3.82667	5.90667	6.84667	3.73	5.24	7.96	3.77	4.92333	6.37	6.12	4.18667	4.26	3.94
Glyma.11G018700	WD40	WD40 repeat-containing protein // G-protein beta subunit-like protein (contains WD40 repeats) // WD40 repeat protein // mRNA export protein (contains WD40 repeats) // Histone H3 (Lys4) methyltransferase complex and RNA cleavage factor II complex, subunit SWD2	1.06667	1.42	1.37667	1.44667	1.65333	1.99333	0.623333	0.923333	1.02333	1.03	1.16	1.05	1.51667	1.56333	1.30333	1.06	1.05667	1.18333	6.78	7.39	6.36333	5.85667	5.99333	4.54667	6.33	6.29667	6.04667	5.25667	7.12667	5.58333	6.44333	7.49	6.09	5.28	5.89667	5.25333
Glyma.01G192100	CK2A	casein kinase II subunit alpha (CSNK2A)	3.51	3.96667	4.01667	2.75667	4.02667	6.02333	2.95667	2.31333	4.31333	3.40667	4.11333	3.99	4.31667	3.23333	3.78	2.87667	3	2.78667	20.93	18.82	17.72	15.7633	24.3367	18.9767	25.4633	27.71	29.28	21.2467	17.3167	20.94	22.15	18.8033	16.5533	17.0567	19.8767	19.4567
Glyma.05G104200	CK2A	casein kinase II subunit alpha (CSNK2A)	11.8433	11.1567	12.38	10.9467	12.9133	13.8033	12.67	9.47333	14.07	9.31333	11.8533	12.7733	11.2233	11.5933	11.43	9.28	10.42	9.72333	33.99	33.9	26.52	32.8433	42.1767	31.9867	35.52	41.0167	35.7733	35.1867	38.2533	31.19	32.0367	36.3433	36.1867	30.71	34.94	36.9467
Glyma.11G050000	CK2A	casein kinase II subunit alpha (CSNK2A)	9.08333	7.55	8.74	7.06333	7.46667	10.3467	7.88333	4.79667	9.71667	6.28333	7.11333	8.52333	8.25	6.55333	7.72	5.45	6.07667	7.11667	39.84	33.7833	33.5	33.1667	31.8567	32.0767	34.0167	34.2333	36.9967	33.0233	28.08	29.5533	36.9933	34.6367	32.89	29.69	27.19	30.38
Glyma.17G163700	CK2B	casein kinase II subunit alpha (CSNK2A)	10.6933	9.83333	11.2633	7.85667	9.69667	12.72	10.7133	7.57667	12.1233	8.83667	10.0133	10.5	9.63667	8.88	9.21	8.19333	8.98333	8.71	28.91	29.5233	24.5033	27.86	31.42	29.5067	31.9	30.4833	30.54	30.3867	28.2467	30.6767	25.5233	28.3067	28.9333	28.5433	28.59	31.2367
Glyma.01G203800	CK2B	casein kinase II subunit beta (CSNK2B)	33.5867	32.68	35.8033	30.3767	32.3933	39.8767	34.3967	34.6167	36.2533	28.5667	33.54	32.8733	32.2333	32.6867	36.3033	28.1967	32.1	31.29	47.77	47.8733	48.1767	47.0267	60	57.6433	53.5667	53.1667	58.8267	48.4667	50.8367	55.74	48.8733	54.45	52.57	40.39	50.05	53.11
Glyma.05G067100	CK2B	casein kinase II subunit beta (CSNK2B)	1.51	1.90333	1.59667	1.29333	1.49333	1.96667	1.49	2.55	2.18333	1.58333	2.61333	1.42667	1.51	2.04	1.58	1.26667	1.37	1.06333	11.1467	10.5267	11.8367	12.7767	20.23	14.55	16.52	17.34	14.98	14.2933	22.9467	11.9433	12.9333	12.72	11.1633	15.09	12.4133	12.48
Glyma.05G067300	CK2B	casein kinase II subunit beta (CSNK2B)	19.5233	20.46	17.83	17.59	18.7733	22.2367	21.98	20.7667	20.9933	21.8067	23.5167	21.51	20.1	21.38	19.0667	17.82	20.5967	17.7267	39.7633	49.3167	52.2	53.4533	56.16	47.1167	66.3633	68.9033	56.6333	70.0567	86.8267	61.01	43.0467	60.9533	66.8167	66.5933	60.6467	58.3733
Glyma.11G039100	CK2B	casein kinase II subunit beta (CSNK2B)	28.6267	28.3133	30.6067	27.9033	30.29	33.96	29.4067	30.69	32.23	27.7633	28.2233	28.0467	29.3167	27.7133	31.7467	26.2267	28.5233	27.2167	51.96	49.9833	49.83	54.5	67.5733	65.2667	53	54.6567	60.38	51.8733	53.18	53.1333	50.94	52.5233	49.32	45.6667	51.25	55.1333
Glyma.17G149300	CK2B	casein kinase II subunit beta (CSNK2B)	1.48	0.98	0.936667	1.03667	1.46333	1.84667	1.03667	0.716667	1.23	0.673333	1.09667	0.48	0.886667	1.11667	0.696667	0.803333	0.91	0.606667	13.1433	14.6833	14.03	17.76	21.4367	16.1333	14.4667	17.9033	13.43	17.54	24.01	13.34	11.6733	16.5967	13.7733	16.22	12.91	13.5033
Glyma.17G149500	CK2B	casein kinase II subunit beta (CSNK2B)	24.15	23.3533	25.03	21.0733	23.26	28.6733	24.5967	22.9867	28.5667	21.2833	22.9067	24.85	24.8933	22.9467	24.24	21.65	22.5167	23.45	41.01	40.5467	46.3467	49.6067	51.8267	46.0533	56.56	58.35	55.2567	58.1067	64.3967	56.3167	39.32	47.1433	47.44	62.5967	55.65	56.7067
Glyma.09G056100	ZTL	clock-associated PAS protein ZTL (ZTL)	2.88	3.29333	3.48667	3.24	3.47	4.05333	2.28333	2.02333	3.27667	2.78667	3.72667	2.98333	3.67	3.83333	2.91667	2.41667	2.83667	2.85333	8.73333	10.14	9.75333	5.32	4.63	3.66667	10.1633	11	8.82333	10.2133	13.6067	9.53333	8.65667	11.1633	10.83	8.62333	10.5933	9.02333
Glyma.13G097600	ZTL	clock-associated PAS protein ZTL (ZTL)	8.09333	9.83667	9.86667	10.54	10.6133	12.5033	7.38667	6.89333	9.52667	8.63667	9.58	9.16667	9.89333	10.2467	9.18667	8.74667	9.34333	9.72667	18.9333	18.6967	19.6133	13	11.9167	10.7433	24.09	22.59	21.3233	21.8733	22.66	23.53	18.31	21.8567	19.7567	18.6533	22.2067	21.84
Glyma.15G162300	ZTL	clock-associated PAS protein ZTL (ZTL)	4.38667	5.82667	5.24	5.58667	6	6.90667	3.88667	3.44	5.62	4.63667	5.96667	5.29667	6.13667	7.10333	5.21	4.19667	5.04	5.43	11.2933	12.09	11.93	8.83333	7.43	5.9	12.56	12.0433	12.8767	13.9533	15.22	12.1033	12.26	14.38	13.4367	11.9133	13.8233	12.1767
Glyma.17G062000	ZTL	clock-associated PAS protein ZTL (ZTL)	5.31333	7.10333	6.82	6.72333	7.9	9.27667	4.63333	5.51	6.37	5.60333	7.19333	5.99667	6.18667	7.15	6.92667	5.97333	5.87	6.93667	15.5233	15.29	15.42	13.5933	12.93	11.04	20.8133	18.22	18.0067	20.3267	19.71	18.49	15.4933	17.34	17.1167	16.4667	17.4867	16.8933
Glyma.04G101500	CRY	cryptochrome 1 (CRY1)	4.6	4.7	5.54667	5.08	4.60333	5.44	3.23667	4.40333	4.07333	4.55333	5.87333	4.19	4.46333	5.34	4.08667	3.92	4.22667	4.14667	10.8167	12.1433	11.11	11.67	11.1433	10.4933	12.9567	12.9767	10.8433	10.5733	17.3633	10.6667	12.3367	15.3467	15.04	9.63	9.58667	8.36
Glyma.06G103200	CRY	cryptochrome 1 (CRY1)	6.22667	7.11667	6.96667	7.64667	7.58333	7.85333	5.21333	6.07667	5.84333	6.52667	7.52	6.44333	7.00333	8.10333	5.84333	5.78667	5.93	5.57667	35.8567	35.6667	32.3567	29.1767	34.6433	25.97	34.1067	30.0067	30.36	28.5367	28.24	30.69	36.7133	35.4667	29.5967	25.1667	28.1267	28.81
Glyma.13G089200	CRY	cryptochrome 1 (CRY1)	0.813333	0.793333	0.9	1.79333	1.41667	1.44333	0.736667	0.466667	0.923333	0.706667	0.56	0.896667	0.946667	0.87	0.95	0.736667	0.49	0.666667	11.8667	21.3667	13.7967	9.13333	14.8167	4.87333	13.6833	14.8	11.86	10.4267	18.8333	9.49667	10.5733	14.1367	10.9333	11.4167	14.1067	13.6867
Glyma.14G174200	CRY	cryptochrome 1 (CRY1)	1.52333	1.97333	2.07	2.86333	3.15333	3.26	1.2	1.11667	1.55	1.13667	1.39667	1.39	2.12333	2.40333	1.57	1.04333	0.93	1.3	23.3033	31.0567	21.1167	14.7233	16.4033	8.71	18.33	20.53	19.3667	15.11	22.2533	15.8567	20.29	23.6267	19.9167	16.11	20.5767	21.3867
Glyma.02G005700	CRY	cryptochrome 2 (CRY2)	5.20667	5.49333	5.49333	5.88	6.17	7.27667	3.95333	4.99	4.94333	4.39333	4.98333	4.67	5.51333	5.84667	5.05333	4.87333	5.07667	4.64667	8.44333	10.9733	8.04667	7	8.85	7.16667	7.75	8.98	8.99667	6.61667	8.81	8.85333	8.57	9.58667	9.27	6.37667	8.35333	8.96667
Glyma.10G180600	CRY	cryptochrome 2 (CRY2)	19.05	21.3167	20.2867	21.9733	24.09	27.1	16.3867	19.2133	17.7767	19.81	24.2667	18.2367	23.3333	26.6533	20.2733	18.98	20.48	16.13	46.5833	60.8333	49.2367	54.6033	60.93	47.3967	51.6233	67.2733	49.6667	54.2567	84.0333	50.56	50.4933	68.8667	65.96	52.7467	53.5767	51.4433
Glyma.20G209900	CRY	cryptochrome 2 (CRY2)	13.64	16.8967	16.7033	19.72	18.4867	22.68	10.6733	16.6267	13.07	15.1467	17.9333	16.5367	17.3833	18.7933	14.9067	14.53	13.98	12.9767	99.23	124.167	96.2367	110.763	126.7	92.45	98.4467	120.52	102.727	99.2167	152.68	98.5067	94.5667	120.18	110.093	107.143	101.99	99.6533
Glyma.08G021200	ELF3	eIF-2alpha kinase PEK/EIF2AK3	0.803333	0.99	0.99	0.9	1.07667	1.28	0.553333	0.58	0.79	0.86	0.88	0.89	0.996667	1.21333	0.893333	1.02	0.943333	0.863333	0.24	0.246667	0.23	0.206667	0.13	0.213333	0.293333	0.366667	0.243333	0.256667	0.353333	0.263333	0.233333	0.326667	0.523333	0.223333	0.233333	0.186667
Glyma.05G239400	FKF1	flavin-binding kelch repeat F-box protein 1 (FKF1)	2.72667	2.48	3.27667	3.29	3.24333	4.27667	2.47	2.60667	3.37667	3.08333	3.59667	3.50667	3.40333	3.74667	2.63667	2.29	2.37667	3.26	3.59333	2.77	3.66667	6.92667	6.87333	7.32667	5.44667	6.47	4.97667	7.79667	6.97667	5.39333	5.61	6.10667	7.48667	4.50333	5.12667	4.07
Glyma.08G046500	FKF1	flavin-binding kelch repeat F-box protein 1 (FKF1)	2.68333	3.19	2.99333	2.75333	3.57	4.21	2.85	3.64667	3.09	2.94667	3.59333	3.50333	3.68	4.09667	3.12667	2.86333	2.94667	3.44667	3.56	2.30667	3.62	5.46	5.57667	5.47333	5.14333	6.37667	5.18667	6.97	5.87333	5.41667	4.71	4.28333	5.35	5.20333	4.14667	3.32
Glyma.10G141400	PHYA	phytochrome A (PHYA)	2.58	3.08667	3.37667	3.14	3.51333	3.86333	1.72667	1.46667	2.59	2.6	3.37667	2.38	3.42	3.92667	2.76667	2.23	2.08	2.37333	7.37667	8.29333	6.28333	6.12333	5.10667	3.89333	6.64	6.36	5.50667	6.16333	8.57	5.17667	6.85667	8.99667	10.78	5.66333	5.61333	4.45667
Glyma.19G224200	PHYA	phytochrome A (PHYA)	0.503333	1.10667	0.663333	1.07333	0.83	0.96	0.503333	0.286667	0.6	0.62	0.81	0.633333	0.95	0.836667	0.7	0.46	0.55	0.56	2.15667	2.70667	2.05667	1.24	1.07667	0.55	1.89333	2.29667	1.74667	1.60333	2.81333	1.3	2.01	2.52333	2.30333	1.9	1.95333	1.71
Glyma.20G090000	PHYA	phytochrome A (PHYA)	2.10667	2.98667	2.58	3.02333	3.09667	4.29	1.59667	1.28333	2.34667	1.78333	2.54	2.44667	3.20333	3.15333	2.65667	2.21	1.92667	2.19667	7.51667	7.72	6.74	5.77	4.49667	3.84333	7.19333	7.15	5.93	6.22667	6.88	6.31667	7.44	8.31333	7.75667	5.73333	5.91333	5.66667
Glyma.09G035500	PHYB	phytochrome B (PHYB)	11.5933	14.84	13.8833	17.5733	14.91	19.5533	7.31	9.93333	11.2467	11.7033	13.6933	11.9567	16.0767	18.31	13.06	13.9333	11.8333	12.3367	19.1467	22.04	19.19	19.17	14.5367	10.8133	18.7533	21.11	17.62	19.6767	23.5	17.77	16.96	23.8467	25.2633	18.1167	15.5433	16.27
Glyma.15G140000	PHYB	phytochrome B (PHYB)	7.81667	10.46	8.58	11.6733	10.7833	11.5367	5.24333	5.50333	7.48333	8.04333	9.96667	7.60667	10.28	11.12	8.69	9.34333	8.40667	8.69667	7.50667	8.49	7.54333	6.38	4.25333	3.97667	6.94	6.78	6.79	7.22	7.91667	7.06667	7.61333	9.13333	9.64667	6.61333	6.24	5.7
Glyma.03G225000	PIF3	phytochrome-interacting factor 3 (PIF3)	0.19	0.11	0.146667	0.14	0.386667	0.223333	0.32	0.29	0.143333	0.133333	0.52	0.213333	0.226667	0.363333	0.226667	0.353333	0.193333	0.223333	5.06667	3.61333	2.77	7.10333	6.77	2.80667	4.06667	6.96	2.87333	5.2	11.5233	3.12667	4.41667	9.18667	6.03333	3.39333	3.29	2.64333
Glyma.10G138800	PIF3	phytochrome-interacting factor 3 (PIF3)	0	0	0	0	0	0	0	0	0	0	0	0	0	0	0	0	0	0	0	0	0	0.0133333	0	0	0.04	0	0	0	0	0.0133333	0	0.01	0	0	0	0
Glyma.10G142600	PIF3	phytochrome-interacting factor 3 (PIF3)	1.24	0.923333	1.25667	1.29667	1.27333	1.33333	0.84	1.18667	1.09	0.943333	1.47333	0.796667	1.16	1.65333	0.87	0.9	1.27667	0.933333	1.93	1.26667	1.53	1.25	0.883333	1.06667	3.62333	1.74667	1.19667	2.67333	2.87667	2.35	1.52667	1.86667	1.63333	1.25667	1.53333	1.28
Glyma.19G222000	PIF3	phytochrome-interacting factor 3 (PIF3)	0.426667	0.366667	0.246667	0.583333	0.516667	0.146667	0.463333	0.526667	0.333333	0.203333	0.873333	0.126667	0.21	0.836667	0.31	0.18	0.54	0.283333	5.69667	3.67	2.43667	10.0867	7.9	3.88333	6.20333	10.4833	3.66667	9.23	13.3233	5.43333	6.95	10.3367	3.74667	7.65	4.78667	4.24
Glyma.19G224700	PIF3	phytochrome-interacting factor 3 (PIF3)	4.43333	3.46	3.00333	4.51	4.45	5.05667	3.63667	3.20333	3.46	4.29333	4.80667	3.50333	5.13333	4.86333	3.64667	4.60333	5.18	3.55667	1.20667	0.953333	1.16	1.06333	0.666667	1.17667	1.34	1.46	0.93	1.62	1.52667	1.10667	1.22	1.02667	2.17333	1.01667	0.86	0.773333
Glyma.20G091200	PIF3	phytochrome-interacting factor 3 (PIF3)	5.03667	4.81	5.36	7.75667	6.55667	5.74	4.48667	5.83	4.88	5.42667	7.58333	5.28	6.26333	8.30667	5.27	5.54667	6.73333	5.23	0.653333	0.75	0.586667	0.68	0.376667	0.793333	1.17	0.703333	0.526667	1.25	1.61	0.696667	0.696667	0.906667	1.2	0.896667	0.596667	0.536667
Glyma.04G050200	ELF3	protein EARLY FLOWERING 3 (ELF3)	2.63333	3.39	3.21667	3.16333	2.87667	3.95333	2.20667	2.31	2.4	2.75	3.59	2.4	2.99333	3.70667	2.86333	2.43667	2.22	2.22333	10.84	14.0367	12.3433	15.06	12.5533	11.5433	14.5833	17.9967	11.7967	16.7867	27.3933	14.4533	14.07	24.21	25.28	14.0367	11.73	10.2533
Glyma.07G013500	ELF3	protein EARLY FLOWERING 3 (ELF3)	4.77667	5.79333	3.93333	5.88333	5.63667	5.80333	4.24	3.96333	4.67667	4.44333	5.83333	4.5	6.27333	6.34	4.61	5.63667	4.36667	3.98667	1.90667	3.21333	2.83667	1.15333	1.95333	1.87333	1.86667	1.47	1.45333	1.38	2.18	1.05333	2.02	1.97	1.76333	1.30333	2.26667	1.36
Glyma.08G197500	ELF3	protein EARLY FLOWERING 3 (ELF3)	0.106667	0.136667	0.22	0.14	0.176667	0.266667	0.13	0.0466667	0.103333	0.1	0.136667	0.08	0.35	0.206667	0.103333	0.14	0.106667	0.143333	0.926667	2.07333	2.07667	0.48	0.746667	2.21	0.426667	0.513333	1.17	0.346667	0.47	0.543333	0.99	0.443333	0.406667	0.326667	1.07667	0.97
Glyma.17G231600	ELF3	protein EARLY FLOWERING 3 (ELF3)	5.33667	7.07	5.72667	7.02	7.79333	8.55667	4.82333	4.95	5.81	5.23333	7.18667	5.41333	8.35667	7.87667	5.94333	7.50333	5.65	4.98667	20.89	20.8333	21.0133	16.9633	18.28	14.6667	22.9667	21.59	19.69	22.1267	23.4633	21.9467	22.43	25.0067	23.7667	20.9467	20.93	18.8667
Glyma.08G363100	FT	protein FLOWERING LOCUS T (FT)	0	0	0	0	0	0	0	0	0	0	0	0	0	0	0	0	0	0	0	0	0	0	0	0	0	0	0	0	0	0	0	0	0	0	0	0
Glyma.16G044100	FT	protein FLOWERING LOCUS T (FT)	0.243333	0.02	0.186667	0.143333	0.373333	0.3	0.18	0.09	0.463333	0.126667	0.11	0.36	0.0566667	0.183333	0.41	0.143333	0.193333	0.396667	18.2167	28.1133	19.67	24.9067	31.2167	22.23	15.8433	23.1467	21.3133	19.94	21.98	16.9067	29.8467	23.1767	24.18	22.9467	25.01	23.0267
Glyma.16G150700	FT	protein FLOWERING LOCUS T (FT)	0.553333	0.143333	0.0566667	0.376667	0.226667	0.0766667	0.456667	0.506667	0.0833333	0.603333	1.03333	0.0566667	0.36	1.05667	0.32	0.363333	0.353333	0.153333	35.17	84.8733	33.4567	83.0233	143.057	44.22	40.6967	55.93	45.41	59.5433	78.83	43.57	63.2033	94.25	57.24	84.0467	72.1167	51.94
Glyma.18G298900	FT	protein FLOWERING LOCUS T (FT)	0	0	0	0	0	0	0	0	0	0	0	0	0	0	0	0	0	0	0	0	0	0	0	0	0	0	0	0	0	0	0	0	0	0	0	0
Glyma.18G299000	FT	protein FLOWERING LOCUS T (FT)	0	0	0	0	0	0	0	0	0	0	0	0	0	0	0	0	0	0	0	0	0	0	0	0	0	0	0	0	0	0	0	0	0	0	0	0
Glyma.19G108200	FT	protein FLOWERING LOCUS T (FT)	0	0	0	0	0	0	0	0	0	0	0	0	0	0	0	0	0	0	1.16333	3.28333	0.58	1.59	3.86	1.22	0.14	1.25	0.353333	0.503333	1.38	0.413333	0.816667	2.23333	0.783333	0.3	0.733333	0.493333
Glyma.01G224200	SPA	protein suppressor of PHYA-105 1 (SPA1)	1.19667	1.39	1.15	1.77	2.01	1.73	0.773333	1.07333	0.966667	1.15	1.44333	0.976667	1.49333	1.7	1.36	1.21	1.38	1.16333	4.44333	4.56667	3.66333	3.34	2.87667	2.48333	4.37	4.13	3.66	3.84333	4.8	3.65	4.51333	4.66333	4.34333	3.05333	3.61667	3.48
Glyma.05G214900	SPA	protein suppressor of PHYA-105 1 (SPA1)	0.0433333	0.09	0.0466667	0.113333	0.14	0.103333	0.08	0.07	0.04	0.13	0.116667	0.0666667	0.14	0.0666667	0.113333	0.0866667	0.0833333	0.0633333	0.0133333	0.0333333	0.00666667	0.0233333	0.01	0.0166667	0.07	0.0366667	0.00666667	0.03	0.03	0.00666667	0	0.03	0.01	0	0.0233333	0
Glyma.07G058200	SPA	protein suppressor of PHYA-105 1 (SPA1)	1.21667	1.73667	1.27	1.77667	2.21	2.05667	0.973333	1.12	1.04	1.20333	1.55	1.13	1.71333	1.90333	1.27333	1.29333	1.41	0.98	8.42667	10.2133	7.16667	5.67333	8.20667	5.52	13.1167	9.12	8.85	8.52667	11.6567	6.94	8.27333	11.42	7.36667	7.97333	10.9467	6.64
Glyma.16G027200	SPA	protein suppressor of PHYA-105 1 (SPA1)	0.216667	0.366667	0.46	0.49	0.52	0.62	0.283333	0.143333	0.3	0.166667	0.27	0.276667	0.316667	0.383333	0.223333	0.173333	0.11	0.186667	4.70333	5.02333	5.22333	3.03333	3.21	2.55	6.19667	6.49667	5.67	6.17333	7.14	5.08333	4.53667	6.3	4.81667	4.08	5.26	3.67667
Glyma.04G166300	PRR1	pseudo-response regulator 1 (TOC1, PRR1)	4.55667	5.58667	4.99333	5.66667	5.99	7.24667	3.57	3	5.12333	4.47333	5.92	4.73667	6.18333	5.84333	4.74333	4.64	4.44	4.42667	19.91	22.78	20.59	16.57	13.69	12.0533	22.1767	24.3767	22.8533	22.6667	31.29	23.6233	22.49	27.62	28.29	19.44	23.9333	19.43
Glyma.05G025000	PRR1	pseudo-response regulator 1 (TOC1, PRR1)	2.46333	3.21333	3.20667	2.87333	3.26333	4.37667	2.32667	1.98	2.89	2.66667	3.71667	2.33333	3.71333	3.92	2.83333	2.38333	2.45667	2.34	19.73	22.2733	19.3433	17.4367	16.67	12.7033	21.8267	25.84	18.7633	25.73	36.14	19.5633	20.3867	28.5433	24.3333	21.3467	22.47	17.21
Glyma.06G196200	PRR1	pseudo-response regulator 1 (TOC1, PRR1)	2.87	3.26	3.07667	2.87667	3.35333	3.97667	2.77	2.51	2.98	3.11667	3.17333	2.96	3.96333	3.85333	2.9	3.10667	2.79	2.88333	13.2333	13.1833	9.90667	11.5033	12.0533	9.89	14.9367	15.8033	13.98	17.41	17.6167	15.5633	14.37	17.3667	17.5233	14.3933	15.45	14.3467
Glyma.17G102200	PRR1	pseudo-response regulator 1 (TOC1, PRR1)	1.96	2.13333	2.47667	2.14667	2.40667	3.35667	1.33	1.10667	2.01	1.62	2.16333	2.20667	2.07	2.34	1.84667	1.39667	1.45667	1.52667	12.5633	14.2033	11.8333	8.39667	8.08	5.97667	15.16	15.12	12.71	15.25	21.48	12.65	14.0733	18.2867	15.0633	12.6267	16.0033	10.8
Glyma.03G261300	PRR5	pseudo-response regulator 5 (PRR5)	1.54667	1.70333	1.67667	1.74667	1.91	2.27333	0.88	1.33667	1.22333	1.06667	2.03333	1.03667	1.55667	1.66	1.14	0.936667	1.02667	1.09667	1.39667	1.31	1.49667	1.06667	1.63333	1.18667	1.94	1.73	1.27	1.18333	1.82333	1.19	0.893333	0.646667	1.33667	1.23333	1.03667	1.25333
Glyma.04G228300	PRR5	pseudo-response regulator 5 (PRR5)	3.74	4.17667	4.06333	3.90333	5.54667	6.01333	3.45	2.4	3.45333	2.46667	4.00667	3.01333	4.49667	4.69667	3.71667	2.73	3.23667	2.81	23.4967	29.01	35.7033	19.1767	32.8867	20.7433	31.6767	56.3967	38.89	40.47	60.3633	45.4033	30.8833	41.7033	40.3467	20.2733	39.7733	38.35
Glyma.06G136600	PRR5	pseudo-response regulator 5 (PRR5)	1.08667	1.08333	0.986667	0.836667	1.27	1.41667	0.74	0.773333	0.846667	0.566667	0.69	0.95	0.796667	1.10333	0.73	0.61	0.57	0.723333	5.81667	6.26667	5.7	7.49333	10.37	4.81667	7.96	11.6233	5.59	9.25	14.76	6.69	7.74	9.88	8.56333	6.29333	5.63667	4.96333
Glyma.16G018000	PRR5	pseudo-response regulator 5 (PRR5)	0.186667	0.23	0.0766667	0.286667	0.203333	0.203333	0.186667	0.186667	0.166667	0.18	0.54	0.176667	0.45	0.553333	0.13	0.27	0.22	0.0733333	3.14	3.28333	2.87333	2.89333	2.33667	1.75667	5.55	4.31	3.73	4.99	4.02333	3.45	3.76	5.07	3.82667	3.24	3.99667	3.16667
Glyma.19G260400	PRR5	pseudo-response regulator 5 (PRR5)	3.31333	4.20667	3.65	3.21	5.40667	6.23	2.26	3.21667	3.08333	2.49	3.91333	2.33333	3.58333	4.70667	2.93	2.38	3.14667	3.08	8.72667	6.86667	9.10667	6.38333	8.86667	6.43667	12.8133	12.27	10.0467	9.44333	10.8733	8.79	6.61	5.78667	5.41333	8.14667	7.45667	8.98
Glyma.09G234900	PAP1	transcription factor MYB75 (PAP1, MYB75)	0	0	0	0	0	0	0	0	0	0	0	0	0	0	0	0	0	0	0	0	0	0	0	0	0	0	0	0	0	0	0	0	0	0	0	0
Glyma.08G042200	XAP5	XAP5	9.73	9.66667	11.6067	9.03	9.76333	12.9967	8.54	5.55	10.6933	9.17333	9.21333	8.69333	9.86	9.57	9.22667	8.31	8.97333	8.60333	18.6367	21.0367	15.6933	11.6633	13.1567	10.4767	22.6867	21.9233	23.02	21.09	22.54	20.98	18.1233	22.1667	20.3	18.69	22.2933	20.67
Glyma.05G234700	XAP5	XAP5	9.56	9.08	9.73333	8.02667	9.61667	12.28	8.95333	5.11333	10.08	7.02667	8.87667	8.80667	9.96	9.31667	8.45	8.08	8.59667	6.96667	17.9733	20.2533	16.6167	13.5967	13.2	11.2533	29.1633	23.9433	23.7167	23.0033	26.7033	22.9	20.3833	22.3467	21.7233	27.3467	25.9	22.19
Glyma.18G027500	ELF4	ELF4	2.08333	1.52667	2.57333	1.58333	2.03	3.17667	2.64667	4.07333	1.73	1.29333	3.25	2.25667	2.11	2.04333	3.84667	1.50667	1.44	2.99	0	0	0	0	0	0	0	0	0	0.85	0	0.81	0.85	0.67	0.213333	0	0.496667	0
Glyma.11G229700	ELF4	ELF4	1.06333	0.793333	0.856667	0.926667	1.19	1.19333	0.91	0.836667	1.14	1.10333	1.23	1.31333	0.843333	1.17	0.893333	0.776667	0.996667	0.976667	1.08333	0.85	1.77333	1.47333	1.36333	3.05333	3.41667	1.52333	4.38333	3.75333	2.07333	4.89333	2.06	3.36	1.81667	2.87	4.08667	2.98333
Glyma.12G060200	LUX	LUX	3.40333	4.02333	3.72	3.35333	4.15333	5.43667	3.35667	2.80333	3.44333	3.06	4.6	4.04333	5.3	4.81667	4.39667	3.19333	3.64667	3.33667	7.37667	6.10667	6.39667	7.60667	8.84333	9.4	7.27667	9.42667	10.1933	10.9867	11.2367	10.3567	10.9133	13.3133	16.6333	7.02	8.97667	7.94667
Glyma.11G136600	LUX	LUX	2.43	2.59667	2.43333	2.75667	3.03333	3.28667	1.91333	2.29	2.24333	2.13	2.80667	2.49	2.87667	2.78	2.95667	1.78667	2.23667	2.29	6.17333	5.96667	7.06333	7.04	9.17667	9.53333	5.44333	10.4567	8.44	8.38	11.3567	11.76	8.09	10.15	14.0733	6.73667	6.73667	7.84333

## Sheet: Metabolites
Table S5b The operation of circadian clocks in soybean pod walls and seeds
GeneID	variable_id	r	pvalue	Descritpion	Compound.name	superclass	class	subclass
Glyma.06G196200	M215T194_POS	-0.762437	0.000234414	pseudo-response regulator 1 (TOC1, PRR1)	Dethiobiotin	Lipids and lipid-like molecules	Fatty Acyls	Fatty acids and conjugates
Glyma.06G196200	M313T734_NEG	-0.754801	0.000294079	pseudo-response regulator 1 (TOC1, PRR1)	12,13-DHOME	Lipids and lipid-like molecules	Fatty Acyls	Fatty acids and conjugates
Glyma.06G196200	M974T533_3_POS	-0.733562	0.000530979	pseudo-response regulator 1 (TOC1, PRR1)	Sinapoyl-CoA	Lipids and lipid-like molecules	Fatty Acyls	Fatty acyl thioesters
Glyma.17G102200	M347T786_POS	-0.731962	0.000553941	pseudo-response regulator 1 (TOC1, PRR1)	Corticosterone	Lipids and lipid-like molecules	Steroids and steroid derivatives	Hydroxysteroids
Glyma.04G166300	M347T786_POS	-0.731274	0.000564061	pseudo-response regulator 1 (TOC1, PRR1)	Corticosterone	Lipids and lipid-like molecules	Steroids and steroid derivatives	Hydroxysteroids
Glyma.06G196200	M391T699_NEG	-0.719761	0.000757836	pseudo-response regulator 1 (TOC1, PRR1)	5-O-Demethylnobiletin
Glyma.04G166300	M363T922_NEG	-0.699897	0.00122213	pseudo-response regulator 1 (TOC1, PRR1)	XMP
Glyma.06G196200	M327T653_NEG	-0.684534	0.00172534	pseudo-response regulator 1 (TOC1, PRR1)	CIF 2	Organic acids and derivatives	Carboxylic acids and derivatives	Amino acids, peptides, and analogues
Glyma.06G196200	M321T870_POS	-0.680051	0.00190087	pseudo-response regulator 1 (TOC1, PRR1)	Anomallotusin
Glyma.06G196200	M347T786_POS	-0.678841	0.00195073	pseudo-response regulator 1 (TOC1, PRR1)	Corticosterone	Lipids and lipid-like molecules	Steroids and steroid derivatives	Hydroxysteroids
Glyma.17G102200	M391T699_NEG	-0.67669	0.00204198	pseudo-response regulator 1 (TOC1, PRR1)	5-O-Demethylnobiletin
Glyma.04G166300	M391T699_NEG	-0.674872	0.00212182	pseudo-response regulator 1 (TOC1, PRR1)	5-O-Demethylnobiletin
Glyma.17G102200	M201T74_POS	-0.673852	0.00216773	pseudo-response regulator 1 (TOC1, PRR1)	D-erythrose 4-phosphate
Glyma.06G196200	M237T723_NEG	-0.669721	0.0023621	pseudo-response regulator 1 (TOC1, PRR1)	OPC-4:0	Organic oxygen compounds	Organooxygen compounds	Carbonyl compounds
Glyma.06G196200	M305T440_POS	-0.664178	0.00264531	pseudo-response regulator 1 (TOC1, PRR1)	Nopaline	Organic acids and derivatives	Carboxylic acids and derivatives	Amino acids, peptides, and analogues
Glyma.06G196200	M305T814_POS	-0.663864	0.00266218	pseudo-response regulator 1 (TOC1, PRR1)	3-Acetoxy-9-heptadecene-4,6-diyn-8-ol.	Lipids and lipid-like molecules	Fatty Acyls	Fatty alcohol esters
Glyma.06G196200	M238T70_POS	-0.66329	0.00269317	pseudo-response regulator 1 (TOC1, PRR1)	S-succinylcysteine	Organic acids and derivatives	Carboxylic acids and derivatives	Amino acids, peptides, and analogues
Glyma.04G166300	M138T295_POS	-0.658984	0.00293549	pseudo-response regulator 1 (TOC1, PRR1)	4-Aminobenzoate	Benzenoids	Benzene and substituted derivatives	Benzoic acids and derivatives
Glyma.17G102200	M640T413_POS	-0.654174	0.00322708	pseudo-response regulator 1 (TOC1, PRR1)	Demethyl-desacetyl-rifamycin S	Phenylpropanoids and polyketides	Macrolactams	NA
Glyma.06G196200	M279T781_POS	-0.652559	0.00333009	pseudo-response regulator 1 (TOC1, PRR1)	?-linolenic acid	Lipids and lipid-like molecules	Fatty Acyls	Lineolic acids and derivatives
Glyma.17G102200	M237T724_POS	-0.651841	0.00337677	pseudo-response regulator 1 (TOC1, PRR1)	Aubergenone	Lipids and lipid-like molecules	Prenol lipids	Sesquiterpenoids
Glyma.04G166300	M287T811_POS	-0.651234	0.00341666	pseudo-response regulator 1 (TOC1, PRR1)	Retinol	Lipids and lipid-like molecules	Prenol lipids	Retinoids
Glyma.05G025000	M201T74_POS	-0.647417	0.00367633	pseudo-response regulator 1 (TOC1, PRR1)	D-erythrose 4-phosphate
Glyma.06G196200	M175T68_NEG	-0.646713	0.00372596	pseudo-response regulator 1 (TOC1, PRR1)	Allantoate	Organic acids and derivatives	Carboxylic acids and derivatives	Amino acids, peptides, and analogues
Glyma.06G196200	M331T724_POS	-0.644237	0.00390483	pseudo-response regulator 1 (TOC1, PRR1)	(7Z,10Z,13Z,16Z,19Z)-Docosapentaenoic acid	Lipids and lipid-like molecules	Fatty Acyls	Fatty acids and conjugates
Glyma.17G102200	M363T922_NEG	-0.642575	0.00402883	pseudo-response regulator 1 (TOC1, PRR1)	XMP
Glyma.17G102200	M287T811_POS	-0.642282	0.00405098	pseudo-response regulator 1 (TOC1, PRR1)	Retinol	Lipids and lipid-like molecules	Prenol lipids	Retinoids
Glyma.04G166300	M193T806_POS	-0.640054	0.00422299	pseudo-response regulator 1 (TOC1, PRR1)	Vitispirane	Organoheterocyclic compounds	Tetrahydrofurans
Glyma.17G102200	M277T796_POS	-0.635389	0.0046024	pseudo-response regulator 1 (TOC1, PRR1)	Dehydrocrepenynic acid	Lipids and lipid-like molecules	Fatty Acyls	Fatty acids and conjugates
Glyma.17G102200	M295T796_POS	-0.635048	0.00463117	pseudo-response regulator 1 (TOC1, PRR1)	Colneleic acid	Lipids and lipid-like molecules	Fatty Acyls	Fatty acids and conjugates
Glyma.04G166300	M321T870_POS	-0.634334	0.00469194	pseudo-response regulator 1 (TOC1, PRR1)	Anomallotusin
Glyma.04G166300	M273T639_POS	-0.631927	0.00490157	pseudo-response regulator 1 (TOC1, PRR1)	Naringenin chalcone	Phenylpropanoids and polyketides	Linear 1,3-diarylpropanoids	Chalcones and dihydrochalcones
Glyma.04G166300	M331T724_POS	-0.631361	0.00495198	pseudo-response regulator 1 (TOC1, PRR1)	(7Z,10Z,13Z,16Z,19Z)-Docosapentaenoic acid	Lipids and lipid-like molecules	Fatty Acyls	Fatty acids and conjugates
Glyma.04G166300	M209T604_POS	-0.630469	0.0050322	pseudo-response regulator 1 (TOC1, PRR1)	alpha-Asarone	Benzenoids	Phenol ethers	Anisoles
Glyma.17G102200	M305T814_POS	-0.629677	0.00510434	pseudo-response regulator 1 (TOC1, PRR1)	3-Acetoxy-9-heptadecene-4,6-diyn-8-ol.	Lipids and lipid-like molecules	Fatty Acyls	Fatty alcohol esters
Glyma.04G166300	M252T98_POS	-0.629339	0.00513535	pseudo-response regulator 1 (TOC1, PRR1)	Deoxyadenosine	Nucleosides, nucleotides, and analogues	Purine nucleosides	Purine 2'-deoxyribonucleosides
Glyma.17G102200	M279T781_POS	-0.62858	0.00520568	pseudo-response regulator 1 (TOC1, PRR1)	?-linolenic acid	Lipids and lipid-like molecules	Fatty Acyls	Lineolic acids and derivatives
Glyma.06G196200	M246T522_NEG	-0.625775	0.00547214	pseudo-response regulator 1 (TOC1, PRR1)	pyridoxal 5-phosphate
Glyma.17G102200	M193T806_POS	-0.625029	0.00554494	pseudo-response regulator 1 (TOC1, PRR1)	Vitispirane	Organoheterocyclic compounds	Tetrahydrofurans
Glyma.06G196200	M159T71_POS	-0.624912	0.00555638	pseudo-response regulator 1 (TOC1, PRR1)	Allantoin	Organoheterocyclic compounds	Azoles	Imidazoles
Glyma.06G196200	M157T70_NEG	-0.623137	0.00573284	pseudo-response regulator 1 (TOC1, PRR1)	(R)(-)-Allantoin	Organoheterocyclic compounds	Azolidines	Imidazolidines
Glyma.17G102200	M215T194_POS	-0.622812	0.00576569	pseudo-response regulator 1 (TOC1, PRR1)	Dethiobiotin	Lipids and lipid-like molecules	Fatty Acyls	Fatty acids and conjugates
Glyma.06G196200	M252T98_POS	-0.621318	0.00591842	pseudo-response regulator 1 (TOC1, PRR1)	Deoxyadenosine	Nucleosides, nucleotides, and analogues	Purine nucleosides	Purine 2'-deoxyribonucleosides
Glyma.17G102200	M313T734_NEG	-0.620415	0.0060123	pseudo-response regulator 1 (TOC1, PRR1)	12,13-DHOME	Lipids and lipid-like molecules	Fatty Acyls	Fatty acids and conjugates
Glyma.06G196200	M1030T697_NEG	-0.619947	0.00606147	pseudo-response regulator 1 (TOC1, PRR1)	Solasodoside A	Lipids and lipid-like molecules	Steroids and steroid derivatives	Steroidal glycosides
Glyma.06G196200	M1028T698_NEG	-0.619016	0.00616016	pseudo-response regulator 1 (TOC1, PRR1)	3-(4'O-Malonyl)Rha(1-2)Gal(1-2)GluA-Soyasaponenol B	Lipids and lipid-like molecules	Prenol lipids	Terpene glycosides
Glyma.06G196200	M249T727_NEG	-0.617438	0.0063305	pseudo-response regulator 1 (TOC1, PRR1)	Viscic acid	Lipids and lipid-like molecules	Prenol lipids	Sesquiterpenoids
Glyma.04G166300	M201T74_POS	-0.615886	0.0065017	pseudo-response regulator 1 (TOC1, PRR1)	D-erythrose 4-phosphate
Glyma.06G196200	M640T413_POS	-0.614259	0.00668514	pseudo-response regulator 1 (TOC1, PRR1)	Demethyl-desacetyl-rifamycin S	Phenylpropanoids and polyketides	Macrolactams	NA
Glyma.06G196200	M949T697_NEG	-0.612929	0.00683821	pseudo-response regulator 1 (TOC1, PRR1)	Zn-Bacteriochlorophyll a
Glyma.05G025000	M640T413_POS	-0.612757	0.00685827	pseudo-response regulator 1 (TOC1, PRR1)	Demethyl-desacetyl-rifamycin S	Phenylpropanoids and polyketides	Macrolactams	NA
Glyma.06G196200	M322T702_NEG	-0.612059	0.00693995	pseudo-response regulator 1 (TOC1, PRR1)	(-)-Jasmonoyl-L-isoleucine	Organic acids and derivatives	Carboxylic acids and derivatives	Amino acids, peptides, and analogues
Glyma.04G166300	M457T870_POS	-0.611736	0.00697794	pseudo-response regulator 1 (TOC1, PRR1)	Oleanolic acid	Lipids and lipid-like molecules	Prenol lipids	Triterpenoids
Glyma.17G102200	M191T595_POS	-0.611447	0.00701213	pseudo-response regulator 1 (TOC1, PRR1)	beta-Damascenone	Organic oxygen compounds	Organooxygen compounds	Carbonyl compounds
Glyma.17G102200	M238T70_POS	-0.610396	0.00713768	pseudo-response regulator 1 (TOC1, PRR1)	S-succinylcysteine	Organic acids and derivatives	Carboxylic acids and derivatives	Amino acids, peptides, and analogues
Glyma.06G196200	M169T761_POS	-0.609155	0.00728815	pseudo-response regulator 1 (TOC1, PRR1)	6-Hydroxy-2,6-dimethyl-2,7-octadien-4-one	Lipids and lipid-like molecules	Prenol lipids	Monoterpenoids
Glyma.17G102200	M169T761_POS	-0.607772	0.00745893	pseudo-response regulator 1 (TOC1, PRR1)	6-Hydroxy-2,6-dimethyl-2,7-octadien-4-one	Lipids and lipid-like molecules	Prenol lipids	Monoterpenoids
Glyma.06G196200	M277T796_POS	-0.605069	0.00780193	pseudo-response regulator 1 (TOC1, PRR1)	Dehydrocrepenynic acid	Lipids and lipid-like molecules	Fatty Acyls	Fatty acids and conjugates
Glyma.06G196200	M295T796_POS	-0.604478	0.00787864	pseudo-response regulator 1 (TOC1, PRR1)	Colneleic acid	Lipids and lipid-like molecules	Fatty Acyls	Fatty acids and conjugates
Glyma.05G025000	M347T786_POS	-0.604062	0.00793298	pseudo-response regulator 1 (TOC1, PRR1)	Corticosterone	Lipids and lipid-like molecules	Steroids and steroid derivatives	Hydroxysteroids
Glyma.05G025000	M237T724_POS	-0.60286	0.00809165	pseudo-response regulator 1 (TOC1, PRR1)	Aubergenone	Lipids and lipid-like molecules	Prenol lipids	Sesquiterpenoids
Glyma.17G102200	M151T762_POS	-0.60118	0.00831775	pseudo-response regulator 1 (TOC1, PRR1)	Thymol	Lipids and lipid-like molecules	Prenol lipids	Monoterpenoids
Glyma.06G196200	M183T622_NEG	-0.599318	0.0085741	pseudo-response regulator 1 (TOC1, PRR1)	3-phosphooxypyruvate
Glyma.04G166300	M169T761_POS	-0.598997	0.00861903	pseudo-response regulator 1 (TOC1, PRR1)	6-Hydroxy-2,6-dimethyl-2,7-octadien-4-one	Lipids and lipid-like molecules	Prenol lipids	Monoterpenoids
Glyma.17G102200	M426T439_NEG	-0.598756	0.00865281	pseudo-response regulator 1 (TOC1, PRR1)	ADP group
Glyma.04G166300	M305T814_POS	-0.598632	0.00867029	pseudo-response regulator 1 (TOC1, PRR1)	3-Acetoxy-9-heptadecene-4,6-diyn-8-ol.	Lipids and lipid-like molecules	Fatty Acyls	Fatty alcohol esters
Glyma.05G025000	M130T68_POS	-0.598409	0.00870172	pseudo-response regulator 1 (TOC1, PRR1)	5-Oxoproline	Organic acids and derivatives	Carboxylic acids and derivatives	Amino acids, peptides, and analogues
Glyma.06G196200	M461T439_NEG	-0.5984	0.00870287	pseudo-response regulator 1 (TOC1, PRR1)	gamma-L-Glutamyl-S-(hercyn-2-yl)-L-cysteine S-oxide	Organic acids and derivatives	Carboxylic acids and derivatives	Amino acids, peptides, and analogues
Glyma.04G166300	M215T194_POS	-0.596313	0.00900145	pseudo-response regulator 1 (TOC1, PRR1)	Dethiobiotin	Lipids and lipid-like molecules	Fatty Acyls	Fatty acids and conjugates
Glyma.06G196200	M353T693_POS	-0.595986	0.00904894	pseudo-response regulator 1 (TOC1, PRR1)	Anileridine	Organoheterocyclic compounds	Piperidines	Phenylpiperidines
Glyma.04G166300	M191T595_POS	-0.595907	0.00906053	pseudo-response regulator 1 (TOC1, PRR1)	beta-Damascenone	Organic oxygen compounds	Organooxygen compounds	Carbonyl compounds
Glyma.06G196200	M329T690_NEG	-0.594929	0.00920394	pseudo-response regulator 1 (TOC1, PRR1)	9,10,13-TriHOME	Lipids and lipid-like molecules	Fatty Acyls	Fatty acids and conjugates
Glyma.06G196200	M1031T697_NEG	-0.593947	0.00934984	pseudo-response regulator 1 (TOC1, PRR1)	Dehydrotomatine	Lipids and lipid-like molecules	Steroids and steroid derivatives	Steroidal glycosides
Glyma.06G196200	M291T743_POS	-0.593884	0.0093592	pseudo-response regulator 1 (TOC1, PRR1)	Deoxy phytoprostane J1	Lipids and lipid-like molecules	Fatty Acyls	Eicosanoids
Glyma.04G166300	M298T830_POS	-0.593387	0.00943379	pseudo-response regulator 1 (TOC1, PRR1)	N7-methylguanosine
Glyma.04G166300	M313T734_NEG	-0.593233	0.00945699	pseudo-response regulator 1 (TOC1, PRR1)	12,13-DHOME	Lipids and lipid-like molecules	Fatty Acyls	Fatty acids and conjugates
Glyma.04G166300	M974T533_3_POS	-0.592994	0.00949316	pseudo-response regulator 1 (TOC1, PRR1)	Sinapoyl-CoA	Lipids and lipid-like molecules	Fatty Acyls	Fatty acyl thioesters
Glyma.04G166300	M338T700_POS	-0.589881	0.00997383	pseudo-response regulator 1 (TOC1, PRR1)	5-Hydroxymethyldeoxycytidylate	Nucleosides, nucleotides, and analogues	Pyrimidine nucleotides	Pyrimidine deoxyribonucleotides
Glyma.06G196200	M365T646_NEG	-0.587746	0.0103145	pseudo-response regulator 1 (TOC1, PRR1)	Ferulenol
Glyma.17G102200	M252T98_POS	-0.587341	0.0103801	pseudo-response regulator 1 (TOC1, PRR1)	Deoxyadenosine	Nucleosides, nucleotides, and analogues	Purine nucleosides	Purine 2'-deoxyribonucleosides
Glyma.06G196200	M883T701_NEG	-0.586099	0.0105837	pseudo-response regulator 1 (TOC1, PRR1)	Pennogenin 3-O-beta-chacotrioside	Lipids and lipid-like molecules	Steroids and steroid derivatives	Steroidal glycosides
Glyma.17G102200	M130T68_POS	-0.585401	0.0106994	pseudo-response regulator 1 (TOC1, PRR1)	5-Oxoproline	Organic acids and derivatives	Carboxylic acids and derivatives	Amino acids, peptides, and analogues
Glyma.05G025000	M238T70_POS	-0.583576	0.0110069	pseudo-response regulator 1 (TOC1, PRR1)	S-succinylcysteine	Organic acids and derivatives	Carboxylic acids and derivatives	Amino acids, peptides, and analogues
Glyma.17G102200	M338T700_POS	-0.5832	0.0110711	pseudo-response regulator 1 (TOC1, PRR1)	5-Hydroxymethyldeoxycytidylate	Nucleosides, nucleotides, and analogues	Pyrimidine nucleotides	Pyrimidine deoxyribonucleotides
Glyma.04G166300	M640T413_POS	-0.583179	0.0110746	pseudo-response regulator 1 (TOC1, PRR1)	Demethyl-desacetyl-rifamycin S	Phenylpropanoids and polyketides	Macrolactams	NA
Glyma.17G102200	M329T783_POS	-0.582089	0.0112625	pseudo-response regulator 1 (TOC1, PRR1)	(4Z,7Z,10Z,13Z,16Z,19Z)-Docosahexaenoic acid	Lipids and lipid-like molecules	Fatty Acyls	Fatty acids and conjugates
Glyma.17G102200	M331T724_POS	-0.581338	0.0113936	pseudo-response regulator 1 (TOC1, PRR1)	(7Z,10Z,13Z,16Z,19Z)-Docosapentaenoic acid	Lipids and lipid-like molecules	Fatty Acyls	Fatty acids and conjugates
Glyma.06G196200	M193T806_POS	-0.581206	0.0114167	pseudo-response regulator 1 (TOC1, PRR1)	Vitispirane	Organoheterocyclic compounds	Tetrahydrofurans
Glyma.06G196200	M151T762_POS	-0.578655	0.0118712	pseudo-response regulator 1 (TOC1, PRR1)	Thymol	Lipids and lipid-like molecules	Prenol lipids	Monoterpenoids
Glyma.17G102200	M106T70_POS	-0.577648	0.0120546	pseudo-response regulator 1 (TOC1, PRR1)	L-Serine	Organic acids and derivatives	Carboxylic acids and derivatives	Amino acids, peptides, and analogues
Glyma.06G196200	M106T70_POS	-0.577576	0.0120679	pseudo-response regulator 1 (TOC1, PRR1)	L-Serine	Organic acids and derivatives	Carboxylic acids and derivatives	Amino acids, peptides, and analogues
Glyma.06G196200	M338T700_POS	-0.576635	0.0122414	pseudo-response regulator 1 (TOC1, PRR1)	5-Hydroxymethyldeoxycytidylate	Nucleosides, nucleotides, and analogues	Pyrimidine nucleotides	Pyrimidine deoxyribonucleotides
Glyma.17G102200	M209T604_POS	-0.576111	0.0123389	pseudo-response regulator 1 (TOC1, PRR1)	alpha-Asarone	Benzenoids	Phenol ethers	Anisoles
Glyma.04G166300	M185T66_POS	-0.575648	0.0124255	pseudo-response regulator 1 (TOC1, PRR1)	5-Hydroxyisourate	Organoheterocyclic compounds	Imidazopyrimidines	Purines and purine derivatives
Glyma.06G196200	M190T145_NEG	-0.572949	0.0129406	pseudo-response regulator 1 (TOC1, PRR1)	2,3-Dihydro-2-oxo-1H-indole-3-acetic acid	Organoheterocyclic compounds	Indoles and derivatives	Indolyl carboxylic acids and derivatives
Glyma.06G196200	M1050T685_NEG	-0.572089	0.0131083	pseudo-response regulator 1 (TOC1, PRR1)	Solanigroside G	Lipids and lipid-like molecules	Steroids and steroid derivatives	Steroidal glycosides
Glyma.06G196200	M209T604_POS	-0.572082	0.0131096	pseudo-response regulator 1 (TOC1, PRR1)	alpha-Asarone	Benzenoids	Phenol ethers	Anisoles
Glyma.05G025000	M391T699_NEG	-0.571579	0.0132085	pseudo-response regulator 1 (TOC1, PRR1)	5-O-Demethylnobiletin
Glyma.05G025000	M287T811_POS	-0.56968	0.013587	pseudo-response regulator 1 (TOC1, PRR1)	Retinol	Lipids and lipid-like molecules	Prenol lipids	Retinoids
Glyma.06G196200	M201T74_POS	-0.569437	0.0136359	pseudo-response regulator 1 (TOC1, PRR1)	D-erythrose 4-phosphate
Glyma.04G166300	M277T796_POS	-0.568281	0.0138713	pseudo-response regulator 1 (TOC1, PRR1)	Dehydrocrepenynic acid	Lipids and lipid-like molecules	Fatty Acyls	Fatty acids and conjugates
Glyma.17G102200	M457T870_POS	-0.567361	0.0140609	pseudo-response regulator 1 (TOC1, PRR1)	Oleanolic acid	Lipids and lipid-like molecules	Prenol lipids	Triterpenoids
Glyma.17G102200	M291T743_POS	-0.565437	0.0144639	pseudo-response regulator 1 (TOC1, PRR1)	Deoxy phytoprostane J1	Lipids and lipid-like molecules	Fatty Acyls	Eicosanoids
Glyma.04G166300	M295T796_POS	-0.565201	0.014514	pseudo-response regulator 1 (TOC1, PRR1)	Colneleic acid	Lipids and lipid-like molecules	Fatty Acyls	Fatty acids and conjugates
Glyma.04G166300	M279T781_POS	-0.56425	0.0147171	pseudo-response regulator 1 (TOC1, PRR1)	?-linolenic acid	Lipids and lipid-like molecules	Fatty Acyls	Lineolic acids and derivatives
Glyma.06G196200	M135T69_POS	-0.562554	0.0150849	pseudo-response regulator 1 (TOC1, PRR1)	(R)-2,3-Dihydroxy-3-methylbutanoate	Lipids and lipid-like molecules	Fatty Acyls	Fatty acids and conjugates
Glyma.04G166300	M426T439_NEG	-0.562153	0.0151731	pseudo-response regulator 1 (TOC1, PRR1)	ADP group
Glyma.04G166300	M151T762_POS	-0.561541	0.0153082	pseudo-response regulator 1 (TOC1, PRR1)	Thymol	Lipids and lipid-like molecules	Prenol lipids	Monoterpenoids
Glyma.04G166300	M291T743_POS	-0.560889	0.0154532	pseudo-response regulator 1 (TOC1, PRR1)	Deoxy phytoprostane J1	Lipids and lipid-like molecules	Fatty Acyls	Eicosanoids
Glyma.04G166300	M303T888_POS	-0.560694	0.0154969	pseudo-response regulator 1 (TOC1, PRR1)	(3R,4R)-3-(6-hydroxy-1,3-benzodioxol-5-yl)-3,4-dihydro-2H-chromene-4,7-diol
Glyma.04G166300	M199T446_POS	-0.560555	0.0155279	pseudo-response regulator 1 (TOC1, PRR1)	Hercynine	Organic acids and derivatives	Carboxylic acids and derivatives	Amino acids, peptides, and analogues
Glyma.17G102200	M974T533_3_POS	-0.559681	0.0157248	pseudo-response regulator 1 (TOC1, PRR1)	Sinapoyl-CoA	Lipids and lipid-like molecules	Fatty Acyls	Fatty acyl thioesters
Glyma.06G196200	M317T109_POS	-0.558813	0.0159224	pseudo-response regulator 1 (TOC1, PRR1)	Gibberellin A9	Lipids and lipid-like molecules	Prenol lipids	Diterpenoids
Glyma.06G196200	M183T653_NEG	-0.558614	0.0159678	pseudo-response regulator 1 (TOC1, PRR1)	3-Nonen-1-yl acetate	Lipids and lipid-like molecules	Fatty Acyls	Fatty alcohol esters
Glyma.04G166300	M237T724_POS	-0.556935	0.0163562	pseudo-response regulator 1 (TOC1, PRR1)	Aubergenone	Lipids and lipid-like molecules	Prenol lipids	Sesquiterpenoids
Glyma.05G025000	M298T830_POS	-0.556659	0.0164209	pseudo-response regulator 1 (TOC1, PRR1)	N7-methylguanosine
Glyma.17G102200	M237T723_NEG	-0.556593	0.0164364	pseudo-response regulator 1 (TOC1, PRR1)	OPC-4:0	Organic oxygen compounds	Organooxygen compounds	Carbonyl compounds
Glyma.06G196200	M204T126_NEG	-0.555687	0.0166499	pseudo-response regulator 1 (TOC1, PRR1)	Pantothenol	Lipids and lipid-like molecules	Fatty Acyls	Fatty amides
Glyma.17G102200	M273T639_POS	-0.554081	0.0170336	pseudo-response regulator 1 (TOC1, PRR1)	Naringenin chalcone	Phenylpropanoids and polyketides	Linear 1,3-diarylpropanoids	Chalcones and dihydrochalcones
Glyma.17G102200	M185T66_POS	-0.552031	0.0175338	pseudo-response regulator 1 (TOC1, PRR1)	5-Hydroxyisourate	Organoheterocyclic compounds	Imidazopyrimidines	Purines and purine derivatives
Glyma.05G025000	M363T922_NEG	-0.551643	0.0176296	pseudo-response regulator 1 (TOC1, PRR1)	XMP
Glyma.17G102200	M350T742_POS	-0.549082	0.0182735	pseudo-response regulator 1 (TOC1, PRR1)	1-(2-carboxyphenylamino)-1-deoxy-D-ribulose 5-phosphate
Glyma.06G196200	M381T651_NEG	-0.548596	0.0183976	pseudo-response regulator 1 (TOC1, PRR1)	(3R)-3-Hydroxy-16-methoxy-1,2-didehydro-2,3-dihydrotabersonine	Alkaloids and derivatives	Plumeran-type alkaloids	NA
Glyma.06G196200	M185T66_POS	-0.547861	0.0185869	pseudo-response regulator 1 (TOC1, PRR1)	5-Hydroxyisourate	Organoheterocyclic compounds	Imidazopyrimidines	Purines and purine derivatives
Glyma.06G196200	M269T389_NEG	-0.547338	0.0187223	pseudo-response regulator 1 (TOC1, PRR1)	4',6,7-Trihydroxyisoflavone	Phenylpropanoids and polyketides	Isoflavonoids	Isoflav-2-enes
Glyma.04G166300	M106T70_POS	-0.546911	0.0188337	pseudo-response regulator 1 (TOC1, PRR1)	L-Serine	Organic acids and derivatives	Carboxylic acids and derivatives	Amino acids, peptides, and analogues
Glyma.06G196200	M915T695_NEG	-0.544851	0.0193773	pseudo-response regulator 1 (TOC1, PRR1)	Abutiloside B	Lipids and lipid-like molecules	Steroids and steroid derivatives	Steroidal glycosides
Glyma.17G102200	M303T888_POS	-0.54467	0.0194259	pseudo-response regulator 1 (TOC1, PRR1)	(3R,4R)-3-(6-hydroxy-1,3-benzodioxol-5-yl)-3,4-dihydro-2H-chromene-4,7-diol
Glyma.05G025000	M215T194_POS	-0.543953	0.0196184	pseudo-response regulator 1 (TOC1, PRR1)	Dethiobiotin	Lipids and lipid-like molecules	Fatty Acyls	Fatty acids and conjugates
Glyma.17G102200	M321T870_POS	-0.543546	0.0197282	pseudo-response regulator 1 (TOC1, PRR1)	Anomallotusin
Glyma.04G166300	M258T660_POS	-0.543472	0.0197483	pseudo-response regulator 1 (TOC1, PRR1)	Norcraugsodine	Benzenoids	Phenols	Benzenediols
Glyma.04G166300	M238T70_POS	-0.542428	0.020033	pseudo-response regulator 1 (TOC1, PRR1)	S-succinylcysteine	Organic acids and derivatives	Carboxylic acids and derivatives	Amino acids, peptides, and analogues
Glyma.05G025000	M147T69_POS	-0.541203	0.020371	pseudo-response regulator 1 (TOC1, PRR1)	L-Glutamine	Organic acids and derivatives	Carboxylic acids and derivatives	Amino acids, peptides, and analogues
Glyma.06G196200	M350T742_POS	-0.539059	0.0209731	pseudo-response regulator 1 (TOC1, PRR1)	1-(2-carboxyphenylamino)-1-deoxy-D-ribulose 5-phosphate
Glyma.04G166300	M130T68_POS	-0.53826	0.0212011	pseudo-response regulator 1 (TOC1, PRR1)	5-Oxoproline	Organic acids and derivatives	Carboxylic acids and derivatives	Amino acids, peptides, and analogues
Glyma.06G196200	M417T438_POS	-0.537295	0.021479	pseudo-response regulator 1 (TOC1, PRR1)	Daidzein-8-C-glucoside	Phenylpropanoids and polyketides	Isoflavonoids	Isoflavonoid C-glycosides
Glyma.17G102200	M269T389_NEG	-0.537209	0.0215039	pseudo-response regulator 1 (TOC1, PRR1)	4',6,7-Trihydroxyisoflavone	Phenylpropanoids and polyketides	Isoflavonoids	Isoflav-2-enes
Glyma.06G196200	M340T433_POS	-0.536489	0.0217134	pseudo-response regulator 1 (TOC1, PRR1)	5-amino-1-(5-phospho-D-ribosyl)imidazole-4-carboxylate
Glyma.04G166300	M207T711_POS	-0.536325	0.0217614	pseudo-response regulator 1 (TOC1, PRR1)	Etrogol	Benzenoids	Phenols	Tyrosols and derivatives
Glyma.06G196200	M329T783_POS	-0.536316	0.0217641	pseudo-response regulator 1 (TOC1, PRR1)	(4Z,7Z,10Z,13Z,16Z,19Z)-Docosahexaenoic acid	Lipids and lipid-like molecules	Fatty Acyls	Fatty acids and conjugates
Glyma.05G025000	M269T389_NEG	-0.535907	0.0218839	pseudo-response regulator 1 (TOC1, PRR1)	4',6,7-Trihydroxyisoflavone	Phenylpropanoids and polyketides	Isoflavonoids	Isoflav-2-enes
Glyma.05G025000	M106T70_POS	-0.53494	0.0221695	pseudo-response regulator 1 (TOC1, PRR1)	L-Serine	Organic acids and derivatives	Carboxylic acids and derivatives	Amino acids, peptides, and analogues
Glyma.17G102200	M298T830_POS	-0.53475	0.0222257	pseudo-response regulator 1 (TOC1, PRR1)	N7-methylguanosine
Glyma.06G196200	M191T595_POS	-0.532922	0.0227745	pseudo-response regulator 1 (TOC1, PRR1)	beta-Damascenone	Organic oxygen compounds	Organooxygen compounds	Carbonyl compounds
Glyma.06G196200	M363T922_NEG	-0.53262	0.0228662	pseudo-response regulator 1 (TOC1, PRR1)	XMP
Glyma.17G102200	M147T69_POS	-0.531179	0.0233079	pseudo-response regulator 1 (TOC1, PRR1)	L-Glutamine	Organic acids and derivatives	Carboxylic acids and derivatives	Amino acids, peptides, and analogues
Glyma.04G166300	M329T783_POS	-0.530755	0.0234388	pseudo-response regulator 1 (TOC1, PRR1)	(4Z,7Z,10Z,13Z,16Z,19Z)-Docosahexaenoic acid	Lipids and lipid-like molecules	Fatty Acyls	Fatty acids and conjugates
Glyma.05G025000	M322T702_NEG	-0.530628	0.0234782	pseudo-response regulator 1 (TOC1, PRR1)	(-)-Jasmonoyl-L-isoleucine	Organic acids and derivatives	Carboxylic acids and derivatives	Amino acids, peptides, and analogues
Glyma.06G196200	M130T68_POS	-0.530339	0.0235682	pseudo-response regulator 1 (TOC1, PRR1)	5-Oxoproline	Organic acids and derivatives	Carboxylic acids and derivatives	Amino acids, peptides, and analogues
Glyma.17G102200	M353T693_POS	-0.529797	0.0237375	pseudo-response regulator 1 (TOC1, PRR1)	Anileridine	Organoheterocyclic compounds	Piperidines	Phenylpiperidines
Glyma.06G196200	M205T228_NEG	-0.5281	0.0242734	pseudo-response regulator 1 (TOC1, PRR1)	(2S,3R)-3-Hydroxybutane-1,2,3-tricarboxylate	Organic acids and derivatives	Carboxylic acids and derivatives	Tricarboxylic acids and derivatives
Glyma.06G196200	M367T646_NEG	-0.52764	0.0244203	pseudo-response regulator 1 (TOC1, PRR1)	17-O-Acetylajmaline	Alkaloids and derivatives	Ajmaline-sarpagine alkaloids	NA
Glyma.04G166300	M433T374_POS	-0.524359	0.0254884	pseudo-response regulator 1 (TOC1, PRR1)	Apigenin-7-O-glucoside	Phenylpropanoids and polyketides	Flavonoids	Flavonoid glycosides
Glyma.06G196200	M247T307_POS	-0.523207	0.0258716	pseudo-response regulator 1 (TOC1, PRR1)	Hassanon	Phenylpropanoids and polyketides	Coumarins and derivatives
Glyma.04G166300	M120T69_POS	-0.521808	0.0263434	pseudo-response regulator 1 (TOC1, PRR1)	Threonine	Organic acids and derivatives	Carboxylic acids and derivatives	Amino acids, peptides, and analogues
Glyma.05G025000	M237T723_NEG	-0.521219	0.0265441	pseudo-response regulator 1 (TOC1, PRR1)	OPC-4:0	Organic oxygen compounds	Organooxygen compounds	Carbonyl compounds
Glyma.05G025000	M216T376_NEG	-0.520115	0.0269233	pseudo-response regulator 1 (TOC1, PRR1)	N-Acetyl-L-citrulline	Organic acids and derivatives	Carboxylic acids and derivatives	Amino acids, peptides, and analogues
Glyma.05G025000	M158T107_NEG	-0.519658	0.0270816	pseudo-response regulator 1 (TOC1, PRR1)	5-Acetamidopentanoate	Lipids and lipid-like molecules	Fatty Acyls	Fatty acids and conjugates
Glyma.06G196200	M261T304_POS	-0.519324	0.0271975	pseudo-response regulator 1 (TOC1, PRR1)	Lacinilene C 7-methyl ether	Lipids and lipid-like molecules	Prenol lipids	Sesquiterpenoids
Glyma.06G196200	M349T687_POS	-0.519224	0.0272325	pseudo-response regulator 1 (TOC1, PRR1)	Gibberellin A111	Lipids and lipid-like molecules	Prenol lipids	Diterpenoids
Glyma.06G196200	M611T488_POS	-0.519122	0.027268	pseudo-response regulator 1 (TOC1, PRR1)	Kaempferol 3,7-di-O-glucoside	Phenylpropanoids and polyketides	Flavonoids	Flavonoid glycosides
Glyma.05G025000	M252T98_POS	-0.518927	0.0273363	pseudo-response regulator 1 (TOC1, PRR1)	Deoxyadenosine	Nucleosides, nucleotides, and analogues	Purine nucleosides	Purine 2'-deoxyribonucleosides
Glyma.06G196200	M499T80_POS	-0.518045	0.0276457	pseudo-response regulator 1 (TOC1, PRR1)	Bis-gamma-glutamylcystine	Organic acids and derivatives	Carboxylic acids and derivatives	Amino acids, peptides, and analogues
Glyma.05G025000	M124T986_POS	-0.516002	0.0283734	pseudo-response regulator 1 (TOC1, PRR1)	Nicotinate	Organoheterocyclic compounds	Pyridines and derivatives	Pyridinecarboxylic acids and derivatives
Glyma.05G025000	M277T796_POS	-0.515998	0.028375	pseudo-response regulator 1 (TOC1, PRR1)	Dehydrocrepenynic acid	Lipids and lipid-like molecules	Fatty Acyls	Fatty acids and conjugates
Glyma.05G025000	M613T608_NEG	-0.515301	0.0286264	pseudo-response regulator 1 (TOC1, PRR1)	Neomycin B	Organic oxygen compounds	Organooxygen compounds	Carbohydrates and carbohydrate conjugates
Glyma.05G025000	M313T734_NEG	-0.513863	0.029151	pseudo-response regulator 1 (TOC1, PRR1)	12,13-DHOME	Lipids and lipid-like molecules	Fatty Acyls	Fatty acids and conjugates
Glyma.04G166300	M915T695_NEG	-0.513735	0.0291982	pseudo-response regulator 1 (TOC1, PRR1)	Abutiloside B	Lipids and lipid-like molecules	Steroids and steroid derivatives	Steroidal glycosides
Glyma.04G166300	M350T742_POS	-0.513726	0.0292013	pseudo-response regulator 1 (TOC1, PRR1)	1-(2-carboxyphenylamino)-1-deoxy-D-ribulose 5-phosphate
Glyma.06G196200	M321T394_POS	-0.513719	0.0292039	pseudo-response regulator 1 (TOC1, PRR1)	PR-toxin	Organoheterocyclic compounds	Oxepanes	NA
Glyma.17G102200	M177T695_POS	-0.51232	0.0297222	pseudo-response regulator 1 (TOC1, PRR1)	4-deoxy-L-threo-hex-4-enopyranuronate
Glyma.04G166300	M322T702_NEG	-0.512285	0.0297354	pseudo-response regulator 1 (TOC1, PRR1)	(-)-Jasmonoyl-L-isoleucine	Organic acids and derivatives	Carboxylic acids and derivatives	Amino acids, peptides, and analogues
Glyma.17G102200	M158T107_NEG	-0.512051	0.0298226	pseudo-response regulator 1 (TOC1, PRR1)	5-Acetamidopentanoate	Lipids and lipid-like molecules	Fatty Acyls	Fatty acids and conjugates
Glyma.04G166300	M471T243_NEG	-0.511904	0.0298779	pseudo-response regulator 1 (TOC1, PRR1)	Hassmarin	Phenylpropanoids and polyketides	Coumarins and derivatives	Pyranocoumarins
Glyma.06G196200	M346T860_POS	-0.511617	0.0299852	pseudo-response regulator 1 (TOC1, PRR1)	cyclic pyranopterin phosphate
Glyma.05G025000	M295T796_POS	-0.510921	0.0302477	pseudo-response regulator 1 (TOC1, PRR1)	Colneleic acid	Lipids and lipid-like molecules	Fatty Acyls	Fatty acids and conjugates
Glyma.17G102200	M138T295_POS	-0.510255	0.0305	pseudo-response regulator 1 (TOC1, PRR1)	4-Aminobenzoate	Benzenoids	Benzene and substituted derivatives	Benzoic acids and derivatives
Glyma.05G025000	M193T806_POS	-0.510212	0.0305164	pseudo-response regulator 1 (TOC1, PRR1)	Vitispirane	Organoheterocyclic compounds	Tetrahydrofurans
Glyma.06G196200	M479T363_NEG	-0.509781	0.030681	pseudo-response regulator 1 (TOC1, PRR1)	Gossypetin 8-glucoside	Phenylpropanoids and polyketides	Flavonoids	Flavonoid glycosides
Glyma.17G102200	M322T702_NEG	-0.509551	0.0307689	pseudo-response regulator 1 (TOC1, PRR1)	(-)-Jasmonoyl-L-isoleucine	Organic acids and derivatives	Carboxylic acids and derivatives	Amino acids, peptides, and analogues
Glyma.05G025000	M303T888_POS	-0.50922	0.030896	pseudo-response regulator 1 (TOC1, PRR1)	(3R,4R)-3-(6-hydroxy-1,3-benzodioxol-5-yl)-3,4-dihydro-2H-chromene-4,7-diol
Glyma.05G025000	M426T439_NEG	-0.508978	0.030989	pseudo-response regulator 1 (TOC1, PRR1)	ADP group
Glyma.04G166300	M417T438_POS	-0.508966	0.0309938	pseudo-response regulator 1 (TOC1, PRR1)	Daidzein-8-C-glucoside	Phenylpropanoids and polyketides	Isoflavonoids	Isoflavonoid C-glycosides
Glyma.17G102200	M120T69_POS	-0.508844	0.0310407	pseudo-response regulator 1 (TOC1, PRR1)	Threonine	Organic acids and derivatives	Carboxylic acids and derivatives	Amino acids, peptides, and analogues
Glyma.06G196200	M110T938_POS	-0.506559	0.0319319	pseudo-response regulator 1 (TOC1, PRR1)	(S)-2-chloropropanoate
Glyma.04G166300	M186T66_POS	-0.505828	0.032221	pseudo-response regulator 1 (TOC1, PRR1)	2-Amino-3-carboxymuconate semialdehyde	Organic acids and derivatives	Carboxylic acids and derivatives	Amino acids, peptides, and analogues
Glyma.17G102200	M235T732_POS	-0.504583	0.0327182	pseudo-response regulator 1 (TOC1, PRR1)	Germacrene A acid	Lipids and lipid-like molecules	Prenol lipids	Sesquiterpenoids
Glyma.17G102200	M207T711_POS	-0.504164	0.0328869	pseudo-response regulator 1 (TOC1, PRR1)	Etrogol	Benzenoids	Phenols	Tyrosols and derivatives
Glyma.04G166300	M269T389_NEG	-0.503491	0.0331592	pseudo-response regulator 1 (TOC1, PRR1)	4',6,7-Trihydroxyisoflavone	Phenylpropanoids and polyketides	Isoflavonoids	Isoflav-2-enes
Glyma.05G025000	M349T687_POS	-0.503041	0.0333422	pseudo-response regulator 1 (TOC1, PRR1)	Gibberellin A111	Lipids and lipid-like molecules	Prenol lipids	Diterpenoids
Glyma.05G025000	M353T693_POS	-0.502582	0.0335298	pseudo-response regulator 1 (TOC1, PRR1)	Anileridine	Organoheterocyclic compounds	Piperidines	Phenylpiperidines
Glyma.04G166300	M430T906_POS	-0.502241	0.0336696	pseudo-response regulator 1 (TOC1, PRR1)	15alpha-Hydroxysolasodine	Lipids and lipid-like molecules	Steroids and steroid derivatives	Steroidal alkaloids
Glyma.05G025000	M331T724_POS	-0.502167	0.0336999	pseudo-response regulator 1 (TOC1, PRR1)	(7Z,10Z,13Z,16Z,19Z)-Docosapentaenoic acid	Lipids and lipid-like molecules	Fatty Acyls	Fatty acids and conjugates
Glyma.17G102200	M471T243_NEG	-0.501827	0.0338398	pseudo-response regulator 1 (TOC1, PRR1)	Hassmarin	Phenylpropanoids and polyketides	Coumarins and derivatives	Pyranocoumarins
Glyma.04G166300	M158T107_NEG	-0.500974	0.0341929	pseudo-response regulator 1 (TOC1, PRR1)	5-Acetamidopentanoate	Lipids and lipid-like molecules	Fatty Acyls	Fatty acids and conjugates
Glyma.06G196200	M338T243_POS	0.501504	0.0339733	pseudo-response regulator 1 (TOC1, PRR1)	Dihydroneoascorbigen	Organoheterocyclic compounds	Indoles and derivatives	Indoles
Glyma.06G196200	M146T71_POS	0.503193	0.0332803	pseudo-response regulator 1 (TOC1, PRR1)	4-[(Aminoiminomethyl)amino]butanoic acid	Organic acids and derivatives	Carboxylic acids and derivatives	Amino acids, peptides, and analogues
Glyma.04G166300	M120T460_NEG	0.503883	0.0330006	pseudo-response regulator 1 (TOC1, PRR1)	L-Cysteine	Organic acids and derivatives	Carboxylic acids and derivatives	Amino acids, peptides, and analogues
Glyma.06G196200	M167T929_NEG	0.503966	0.0329667	pseudo-response regulator 1 (TOC1, PRR1)	Butanoylphosphate	Organic acids and derivatives	Organic phosphoric acids and derivatives	Phosphate esters
Glyma.06G196200	M723T405_5_POS	0.504742	0.0326545	pseudo-response regulator 1 (TOC1, PRR1)	iron(III)-enterobactin complex
Glyma.06G196200	M251T378_NEG	0.504788	0.0326359	pseudo-response regulator 1 (TOC1, PRR1)	Deoxyinosine	Nucleosides, nucleotides, and analogues	Purine nucleosides	Purine 2'-deoxyribonucleosides
Glyma.06G196200	M713T687_POS	0.505209	0.0324677	pseudo-response regulator 1 (TOC1, PRR1)	Citrusin II	Organic acids and derivatives	Carboxylic acids and derivatives	Amino acids, peptides, and analogues
Glyma.17G102200	M547T141_NEG	0.505846	0.0322139	pseudo-response regulator 1 (TOC1, PRR1)	Neobetanin	Organic oxygen compounds	Organooxygen compounds	Carbohydrates and carbohydrate conjugates
Glyma.04G166300	M332T229_NEG	0.508222	0.0312815	pseudo-response regulator 1 (TOC1, PRR1)	Glucocapparin	Organic oxygen compounds	Organooxygen compounds	Carbohydrates and carbohydrate conjugates
Glyma.06G196200	M275T704_2_POS	0.509343	0.0308488	pseudo-response regulator 1 (TOC1, PRR1)	apiforol
Glyma.06G196200	M183T98_POS	0.510056	0.0305759	pseudo-response regulator 1 (TOC1, PRR1)	D-Sorbitol	Organic oxygen compounds	Organooxygen compounds	Carbohydrates and carbohydrate conjugates
Glyma.06G196200	M273T388_POS	0.510987	0.0302228	pseudo-response regulator 1 (TOC1, PRR1)	Deoxyshikonin	Benzenoids	Naphthalenes	Naphthoquinones
Glyma.17G102200	M308T421_POS	0.511147	0.0301623	pseudo-response regulator 1 (TOC1, PRR1)	Dihydroascorbigen	Organoheterocyclic compounds	Indoles and derivatives	Indoles
Glyma.06G196200	M259T263_POS	0.511361	0.0300817	pseudo-response regulator 1 (TOC1, PRR1)	sn-Glycero-3-phosphocholine	Lipids and lipid-like molecules	Glycerophospholipids	Glycerophosphocholines
Glyma.06G196200	M119T67_NEG	0.512436	0.029679	pseudo-response regulator 1 (TOC1, PRR1)	3,4-Dihydroxybutanoic acid	Organic acids and derivatives	Hydroxy acids and derivatives	Beta hydroxy acids and derivatives
Glyma.05G025000	M150T71_NEG	0.512771	0.0295545	pseudo-response regulator 1 (TOC1, PRR1)	Guanine	Organoheterocyclic compounds	Imidazopyrimidines	Purines and purine derivatives
Glyma.17G102200	M490T337_NEG	0.513879	0.029145	pseudo-response regulator 1 (TOC1, PRR1)	Demethylalangiside	Organic oxygen compounds	Organooxygen compounds	Carbohydrates and carbohydrate conjugates
Glyma.05G025000	M149T71_2_NEG	0.514245	0.0290108	pseudo-response regulator 1 (TOC1, PRR1)	Lyxose	Organic oxygen compounds	Organooxygen compounds	Carbohydrates and carbohydrate conjugates
Glyma.04G166300	M125T937_POS	0.515123	0.028691	pseudo-response regulator 1 (TOC1, PRR1)	3-chloro-L-alanine
Glyma.05G025000	M490T337_NEG	0.515668	0.0284936	pseudo-response regulator 1 (TOC1, PRR1)	Demethylalangiside	Organic oxygen compounds	Organooxygen compounds	Carbohydrates and carbohydrate conjugates
Glyma.06G196200	M353T70_NEG	0.517198	0.0279455	pseudo-response regulator 1 (TOC1, PRR1)	Chlorogenate	Organic oxygen compounds	Organooxygen compounds	Alcohols and polyols
Glyma.06G196200	M479T448_POS	0.517321	0.0279018	pseudo-response regulator 1 (TOC1, PRR1)	Isorhamnetin 3-galactoside	Phenylpropanoids and polyketides	Flavonoids	Flavonoid glycosides
Glyma.06G196200	M165T98_POS	0.518134	0.0276145	pseudo-response regulator 1 (TOC1, PRR1)	3-Hydroxycinnamic acid	Phenylpropanoids and polyketides	Cinnamic acids and derivatives	Hydroxycinnamic acids and derivatives
Glyma.06G196200	M135T68_NEG	0.518955	0.0273263	pseudo-response regulator 1 (TOC1, PRR1)	Threonic acid	Organic oxygen compounds	Organooxygen compounds	Carbohydrates and carbohydrate conjugates
Glyma.06G196200	M459T697_POS	0.519222	0.0272331	pseudo-response regulator 1 (TOC1, PRR1)	Soyasapogenol B	Lipids and lipid-like molecules	Prenol lipids	Triterpenoids
Glyma.04G166300	M205T928_NEG	0.519226	0.0272319	pseudo-response regulator 1 (TOC1, PRR1)	3-Oxalomalate	Organic acids and derivatives	Carboxylic acids and derivatives	Tricarboxylic acids and derivatives
Glyma.06G196200	M262T277_POS	0.519996	0.0269645	pseudo-response regulator 1 (TOC1, PRR1)	Epidermin	Organic oxygen compounds	Organooxygen compounds	Carbohydrates and carbohydrate conjugates
Glyma.06G196200	M248T430_NEG	0.522107	0.0262422	pseudo-response regulator 1 (TOC1, PRR1)	linuron
Glyma.06G196200	M477T422_POS	0.522603	0.0260744	pseudo-response regulator 1 (TOC1, PRR1)	(L-glutamyl)adenylate
Glyma.05G025000	M151T71_NEG	0.525296	0.0251796	pseudo-response regulator 1 (TOC1, PRR1)	N1-Methyl-2-pyridone-5-carboxamide	Organoheterocyclic compounds	Pyridines and derivatives	Pyridinecarboxylic acids and derivatives
Glyma.17G102200	M267T518_POS	0.526327	0.0248434	pseudo-response regulator 1 (TOC1, PRR1)	3,14-Dihydroxy-11,13-dihydrocostunolide	Lipids and lipid-like molecules	Prenol lipids	Terpene lactones
Glyma.06G196200	M129T909_POS	0.526501	0.0247869	pseudo-response regulator 1 (TOC1, PRR1)	3-Octanone	Organic oxygen compounds	Organooxygen compounds	Carbonyl compounds
Glyma.06G196200	M575T652_NEG	0.526882	0.0246637	pseudo-response regulator 1 (TOC1, PRR1)	Maysin	Phenylpropanoids and polyketides	Flavonoids	Flavonoid glycosides
Glyma.05G025000	M663T682_POS	0.526896	0.0246592	pseudo-response regulator 1 (TOC1, PRR1)	Prosapogenin	Lipids and lipid-like molecules	Prenol lipids	Terpene glycosides
Glyma.17G102200	M205T928_NEG	0.527563	0.024445	pseudo-response regulator 1 (TOC1, PRR1)	3-Oxalomalate	Organic acids and derivatives	Carboxylic acids and derivatives	Tricarboxylic acids and derivatives
Glyma.06G196200	M101T73_POS	0.527912	0.0243332	pseudo-response regulator 1 (TOC1, PRR1)	Tiglic acid	Lipids and lipid-like molecules	Fatty Acyls	Fatty acids and conjugates
Glyma.17G102200	M120T460_NEG	0.528618	0.0241088	pseudo-response regulator 1 (TOC1, PRR1)	L-Cysteine	Organic acids and derivatives	Carboxylic acids and derivatives	Amino acids, peptides, and analogues
Glyma.06G196200	M335T325_POS	0.530412	0.0235454	pseudo-response regulator 1 (TOC1, PRR1)	N,N'-Diacetyllegionaminate	Organic oxygen compounds	Organooxygen compounds	Carbohydrates and carbohydrate conjugates
Glyma.06G196200	M209T109_POS	0.531884	0.0230909	pseudo-response regulator 1 (TOC1, PRR1)	Fraxetin	Phenylpropanoids and polyketides	Coumarins and derivatives	Hydroxycoumarins
Glyma.05G025000	M308T420_NEG	0.532573	0.0228807	pseudo-response regulator 1 (TOC1, PRR1)	N-Acetylneuraminate	Organic oxygen compounds	Organooxygen compounds	Carbohydrates and carbohydrate conjugates
Glyma.05G025000	M308T421_POS	0.537224	0.0214996	pseudo-response regulator 1 (TOC1, PRR1)	Dihydroascorbigen	Organoheterocyclic compounds	Indoles and derivatives	Indoles
Glyma.06G196200	M206T195_NEG	0.537305	0.0214762	pseudo-response regulator 1 (TOC1, PRR1)	2-Formaminobenzoylacetate	Organic oxygen compounds	Organooxygen compounds	Carbonyl compounds
Glyma.06G196200	M308T420_NEG	0.539263	0.0209153	pseudo-response regulator 1 (TOC1, PRR1)	N-Acetylneuraminate	Organic oxygen compounds	Organooxygen compounds	Carbohydrates and carbohydrate conjugates
Glyma.06G196200	M473T327_POS	0.543262	0.0198055	pseudo-response regulator 1 (TOC1, PRR1)	Isoobacunoic acid	Lipids and lipid-like molecules	Steroids and steroid derivatives	Steroid lactones
Glyma.06G196200	M218T131_NEG	0.544262	0.0195351	pseudo-response regulator 1 (TOC1, PRR1)	D-Pantothenic acid	Organic oxygen compounds	Organooxygen compounds	Alcohols and polyols
Glyma.06G196200	M176T98_POS	0.544595	0.0194458	pseudo-response regulator 1 (TOC1, PRR1)	Calystegine B4	Alkaloids and derivatives	Tropane alkaloids
Glyma.06G196200	M625T435_POS	0.546146	0.0190342	pseudo-response regulator 1 (TOC1, PRR1)	2,2'-Diketospirilloxanthin	Lipids and lipid-like molecules	Prenol lipids	Tetraterpenoids
Glyma.17G102200	M663T682_POS	0.546258	0.0190046	pseudo-response regulator 1 (TOC1, PRR1)	Prosapogenin	Lipids and lipid-like molecules	Prenol lipids	Terpene glycosides
Glyma.04G166300	M221T67_POS	0.547146	0.0187724	pseudo-response regulator 1 (TOC1, PRR1)	(5R)-Albaflavenol	Lipids and lipid-like molecules	Prenol lipids	Sesquiterpenoids
Glyma.05G025000	M188T164_NEG	0.547194	0.0187598	pseudo-response regulator 1 (TOC1, PRR1)	N-Acetyl-L-glutamic acid	Organic acids and derivatives	Carboxylic acids and derivatives	Amino acids, peptides, and analogues
Glyma.06G196200	M225T65_NEG	0.550378	0.0179455	pseudo-response regulator 1 (TOC1, PRR1)	Glucoheptonic acid	Organic oxygen compounds	Organooxygen compounds	Carbohydrates and carbohydrate conjugates
Glyma.06G196200	M237T431_POS	0.551691	0.0176179	pseudo-response regulator 1 (TOC1, PRR1)	Capsidiol	Lipids and lipid-like molecules	Prenol lipids	Sesquiterpenoids
Glyma.06G196200	M456T345_NEG	0.555237	0.0167567	pseudo-response regulator 1 (TOC1, PRR1)	Amygdalin	Organic oxygen compounds	Organooxygen compounds	Carbohydrates and carbohydrate conjugates
Glyma.06G196200	M187T1029_POS	0.555779	0.0166281	pseudo-response regulator 1 (TOC1, PRR1)	iodoacetate
Glyma.17G102200	M332T229_NEG	0.563436	0.0148928	pseudo-response regulator 1 (TOC1, PRR1)	Glucocapparin	Organic oxygen compounds	Organooxygen compounds	Carbohydrates and carbohydrate conjugates
Glyma.06G196200	M256T94_POS	0.565917	0.0143624	pseudo-response regulator 1 (TOC1, PRR1)	7,8-Dihydromonapterin	Organoheterocyclic compounds	Pteridines and derivatives	Pterins and derivatives
Glyma.06G196200	M265T636_POS	0.567913	0.0139468	pseudo-response regulator 1 (TOC1, PRR1)	4-Oxo-5-(2-pentenyl)-2-cyclopentene-1-hexanoic acid	Lipids and lipid-like molecules	Fatty Acyls	Eicosanoids
Glyma.06G196200	M320T682_POS	0.568371	0.0138529	pseudo-response regulator 1 (TOC1, PRR1)	Norfloxacin	Organoheterocyclic compounds	Quinolines and derivatives	Quinoline carboxylic acids
Glyma.06G196200	M472T499_POS	0.573011	0.0129285	pseudo-response regulator 1 (TOC1, PRR1)	Terfenadine	Benzenoids	Benzene and substituted derivatives	Diphenylmethanes
Glyma.06G196200	M131T157_NEG	0.574458	0.0126506	pseudo-response regulator 1 (TOC1, PRR1)	Methylsuccinic acid	Lipids and lipid-like molecules	Fatty Acyls	Fatty acids and conjugates
Glyma.06G196200	M226T66_NEG	0.574909	0.0125649	pseudo-response regulator 1 (TOC1, PRR1)	Arogenic acid	Organic acids and derivatives	Carboxylic acids and derivatives	Amino acids, peptides, and analogues
Glyma.06G196200	M144T164_NEG	0.576281	0.0123073	pseudo-response regulator 1 (TOC1, PRR1)	4-Guanidinobutanoate	Organic acids and derivatives	Carboxylic acids and derivatives	Amino acids, peptides, and analogues
Glyma.06G196200	M203T697_POS	0.577787	0.0120293	pseudo-response regulator 1 (TOC1, PRR1)	alpha-Curcumene	Lipids and lipid-like molecules	Prenol lipids	Sesquiterpenoids
Glyma.06G196200	M247T796_NEG	0.578458	0.011907	pseudo-response regulator 1 (TOC1, PRR1)	pyridoxamine 5-phosphate
Glyma.06G196200	M220T131_POS	0.586058	0.0105905	pseudo-response regulator 1 (TOC1, PRR1)	Pantothenic acid	Organic oxygen compounds	Organooxygen compounds	Alcohols and polyols
Glyma.06G196200	M894T716_POS	0.587742	0.010315	pseudo-response regulator 1 (TOC1, PRR1)	chlorophyll a
Glyma.06G196200	M578T517_POS	0.591212	0.00976596	pseudo-response regulator 1 (TOC1, PRR1)	C37-phenolphthiocerol A
Glyma.06G196200	M132T157_NEG	0.593192	0.00946322	pseudo-response regulator 1 (TOC1, PRR1)	(S)-Ureidoglycine	Organic acids and derivatives	Carboxylic acids and derivatives	Amino acids, peptides, and analogues
Glyma.06G196200	M496T670_POS	0.59434	0.00929117	pseudo-response regulator 1 (TOC1, PRR1)	N6-(Delta2-isopentenyl)-adenosine 5-diphosphate
Glyma.04G166300	M663T682_POS	0.596043	0.00904073	pseudo-response regulator 1 (TOC1, PRR1)	Prosapogenin	Lipids and lipid-like molecules	Prenol lipids	Terpene glycosides
Glyma.06G196200	M303T840_NEG	0.597346	0.00885265	pseudo-response regulator 1 (TOC1, PRR1)	Discadenine	Organic acids and derivatives	Carboxylic acids and derivatives	Amino acids, peptides, and analogues
Glyma.05G025000	M547T141_NEG	0.60138	0.00829053	pseudo-response regulator 1 (TOC1, PRR1)	Neobetanin	Organic oxygen compounds	Organooxygen compounds	Carbohydrates and carbohydrate conjugates
Glyma.06G196200	M264T421_NEG	0.603191	0.00804771	pseudo-response regulator 1 (TOC1, PRR1)	Thiamine	Organoheterocyclic compounds	Diazines	Pyrimidines and pyrimidine derivatives
Glyma.06G196200	M601T464_POS	0.612983	0.00683205	pseudo-response regulator 1 (TOC1, PRR1)	Sativalanosteronyl glucoside	Lipids and lipid-like molecules	Prenol lipids	Triterpenoids
Glyma.06G196200	M189T697_POS	0.616154	0.0064719	pseudo-response regulator 1 (TOC1, PRR1)	7,8-Diaminononanoate	Lipids and lipid-like molecules	Fatty Acyls	Fatty acids and conjugates
Glyma.06G196200	M353T649_1_POS	0.620997	0.00595167	pseudo-response regulator 1 (TOC1, PRR1)	Citrusinol	Phenylpropanoids and polyketides	Flavonoids	Pyranoflavonoids
Glyma.06G196200	M188T164_NEG	0.621142	0.00593665	pseudo-response regulator 1 (TOC1, PRR1)	N-Acetyl-L-glutamic acid	Organic acids and derivatives	Carboxylic acids and derivatives	Amino acids, peptides, and analogues
Glyma.06G196200	M483T518_POS	0.62334	0.00571248	pseudo-response regulator 1 (TOC1, PRR1)	Gentamicin X2	Organic oxygen compounds	Organooxygen compounds	Carbohydrates and carbohydrate conjugates
Glyma.06G196200	M377T169_POS	0.625671	0.00548226	pseudo-response regulator 1 (TOC1, PRR1)	Loganate	Lipids and lipid-like molecules	Prenol lipids	Terpene glycosides
Glyma.06G196200	M171T165_POS	0.627455	0.00531126	pseudo-response regulator 1 (TOC1, PRR1)	D-glyceraldehyde 3-phosphate
Glyma.06G196200	M303T499_3_POS	0.630209	0.00505578	pseudo-response regulator 1 (TOC1, PRR1)	Abietic acid	Lipids and lipid-like molecules	Prenol lipids	Diterpenoids
Glyma.06G196200	M567T517_2_POS	0.632903	0.00481564	pseudo-response regulator 1 (TOC1, PRR1)	3-hydroxyechinenone	Lipids and lipid-like molecules	Prenol lipids	Tetraterpenoids
Glyma.06G196200	M462T445_POS	0.637019	0.00446678	pseudo-response regulator 1 (TOC1, PRR1)	D-Glucosylsphingosine	Lipids and lipid-like molecules	Sphingolipids	Glycosphingolipids
Glyma.05G025000	M120T460_NEG	0.646298	0.0037555	pseudo-response regulator 1 (TOC1, PRR1)	L-Cysteine	Organic acids and derivatives	Carboxylic acids and derivatives	Amino acids, peptides, and analogues
Glyma.06G196200	M267T518_POS	0.649407	0.00353902	pseudo-response regulator 1 (TOC1, PRR1)	3,14-Dihydroxy-11,13-dihydrocostunolide	Lipids and lipid-like molecules	Prenol lipids	Terpene lactones
Glyma.06G196200	M115T75_NEG	0.657566	0.0030191	pseudo-response regulator 1 (TOC1, PRR1)	Maleic acid	Organic acids and derivatives	Carboxylic acids and derivatives	Dicarboxylic acids and derivatives
Glyma.06G196200	M114T73_POS	0.660953	0.00282257	pseudo-response regulator 1 (TOC1, PRR1)	(S)-1-Pyrroline-5-carboxylate	Organic acids and derivatives	Carboxylic acids and derivatives	Amino acids, peptides, and analogues
Glyma.06G196200	M413T465_2_POS	0.678765	0.00195387	pseudo-response regulator 1 (TOC1, PRR1)	Valenciachrome	Lipids and lipid-like molecules	Prenol lipids	Diterpenoids
Glyma.05G025000	M332T229_NEG	0.693478	0.00141502	pseudo-response regulator 1 (TOC1, PRR1)	Glucocapparin	Organic oxygen compounds	Organooxygen compounds	Carbohydrates and carbohydrate conjugates
Glyma.06G196200	M575T466_POS	0.696384	0.00132477	pseudo-response regulator 1 (TOC1, PRR1)	Stigmasterol-3-O-beta-D-glucopyranoside	Lipids and lipid-like molecules	Steroids and steroid derivatives	Stigmastanes and derivatives
Glyma.06G196200	M402T364_POS	0.708307	0.0010029	pseudo-response regulator 1 (TOC1, PRR1)	Moxifloxacin	Organoheterocyclic compounds	Quinolines and derivatives	Quinoline carboxylic acids
Glyma.06G196200	M205T928_NEG	0.715593	0.00084046	pseudo-response regulator 1 (TOC1, PRR1)	3-Oxalomalate	Organic acids and derivatives	Carboxylic acids and derivatives	Tricarboxylic acids and derivatives
Glyma.06G196200	M852T507_POS	0.727698	0.000619196	pseudo-response regulator 1 (TOC1, PRR1)	3-demethylubiquinol-10
Glyma.06G196200	M384T368_NEG	0.730554	0.000574815	pseudo-response regulator 1 (TOC1, PRR1)	Buntanmine A	Organoheterocyclic compounds	Quinolines and derivatives	Benzoquinolines
Glyma.06G196200	M663T682_POS	0.730711	0.00057246	pseudo-response regulator 1 (TOC1, PRR1)	Prosapogenin	Lipids and lipid-like molecules	Prenol lipids	Terpene glycosides
Glyma.06G196200	M308T421_POS	0.755828	0.000285383	pseudo-response regulator 1 (TOC1, PRR1)	Dihydroascorbigen	Organoheterocyclic compounds	Indoles and derivatives	Indoles
Glyma.06G196200	M339T419_POS	0.760204	0.000250697	pseudo-response regulator 1 (TOC1, PRR1)	1-Caffeoyl-4-deoxyquinic acid	Phenylpropanoids and polyketides	Cinnamic acids and derivatives	Hydroxycinnamic acids and derivatives
Glyma.10G048100	M125T937_POS	0.671104	0.00229547	RESPONSE REGULATOR OF TWO-COMPONENT SYSTEM // SUBFAMILY NOT NAMED // TWO-COMPONENT RESPONSE REGULATOR-LIKE PRR3	3-chloro-L-alanine
Glyma.10G048100	M138T295_POS	-0.609818	0.00720746	RESPONSE REGULATOR OF TWO-COMPONENT SYSTEM // SUBFAMILY NOT NAMED // TWO-COMPONENT RESPONSE REGULATOR-LIKE PRR3	4-Aminobenzoate	Benzenoids	Benzene and substituted derivatives	Benzoic acids and derivatives
Glyma.10G048100	M151T762_POS	-0.568351	0.013857	RESPONSE REGULATOR OF TWO-COMPONENT SYSTEM // SUBFAMILY NOT NAMED // TWO-COMPONENT RESPONSE REGULATOR-LIKE PRR3	Thymol	Lipids and lipid-like molecules	Prenol lipids	Monoterpenoids
Glyma.10G048100	M169T761_POS	-0.6594	0.00291133	RESPONSE REGULATOR OF TWO-COMPONENT SYSTEM // SUBFAMILY NOT NAMED // TWO-COMPONENT RESPONSE REGULATOR-LIKE PRR3	6-Hydroxy-2,6-dimethyl-2,7-octadien-4-one	Lipids and lipid-like molecules	Prenol lipids	Monoterpenoids
Glyma.10G048100	M185T66_POS	-0.502687	0.0334867	RESPONSE REGULATOR OF TWO-COMPONENT SYSTEM // SUBFAMILY NOT NAMED // TWO-COMPONENT RESPONSE REGULATOR-LIKE PRR3	5-Hydroxyisourate	Organoheterocyclic compounds	Imidazopyrimidines	Purines and purine derivatives
Glyma.10G048100	M186T66_POS	-0.507902	0.0314058	RESPONSE REGULATOR OF TWO-COMPONENT SYSTEM // SUBFAMILY NOT NAMED // TWO-COMPONENT RESPONSE REGULATOR-LIKE PRR3	2-Amino-3-carboxymuconate semialdehyde	Organic acids and derivatives	Carboxylic acids and derivatives	Amino acids, peptides, and analogues
Glyma.10G048100	M187T69_POS	-0.54792	0.0185717	RESPONSE REGULATOR OF TWO-COMPONENT SYSTEM // SUBFAMILY NOT NAMED // TWO-COMPONENT RESPONSE REGULATOR-LIKE PRR3	3-maleylpyruvate
Glyma.10G048100	M191T595_POS	-0.645279	0.00382875	RESPONSE REGULATOR OF TWO-COMPONENT SYSTEM // SUBFAMILY NOT NAMED // TWO-COMPONENT RESPONSE REGULATOR-LIKE PRR3	beta-Damascenone	Organic oxygen compounds	Organooxygen compounds	Carbonyl compounds
Glyma.10G048100	M193T806_POS	-0.589989	0.00995683	RESPONSE REGULATOR OF TWO-COMPONENT SYSTEM // SUBFAMILY NOT NAMED // TWO-COMPONENT RESPONSE REGULATOR-LIKE PRR3	Vitispirane	Organoheterocyclic compounds	Tetrahydrofurans
Glyma.10G048100	M199T446_POS	-0.634876	0.00464575	RESPONSE REGULATOR OF TWO-COMPONENT SYSTEM // SUBFAMILY NOT NAMED // TWO-COMPONENT RESPONSE REGULATOR-LIKE PRR3	Hercynine	Organic acids and derivatives	Carboxylic acids and derivatives	Amino acids, peptides, and analogues
Glyma.10G048100	M201T74_POS	-0.726457	0.000639354	RESPONSE REGULATOR OF TWO-COMPONENT SYSTEM // SUBFAMILY NOT NAMED // TWO-COMPONENT RESPONSE REGULATOR-LIKE PRR3	D-erythrose 4-phosphate
Glyma.10G048100	M207T711_POS	-0.688272	0.00158944	RESPONSE REGULATOR OF TWO-COMPONENT SYSTEM // SUBFAMILY NOT NAMED // TWO-COMPONENT RESPONSE REGULATOR-LIKE PRR3	Etrogol	Benzenoids	Phenols	Tyrosols and derivatives
Glyma.10G048100	M209T604_POS	-0.602864	0.00809111	RESPONSE REGULATOR OF TWO-COMPONENT SYSTEM // SUBFAMILY NOT NAMED // TWO-COMPONENT RESPONSE REGULATOR-LIKE PRR3	alpha-Asarone	Benzenoids	Phenol ethers	Anisoles
Glyma.10G048100	M211T567_POS	-0.508251	0.0312701	RESPONSE REGULATOR OF TWO-COMPONENT SYSTEM // SUBFAMILY NOT NAMED // TWO-COMPONENT RESPONSE REGULATOR-LIKE PRR3	(+)-7-Isojasmonic acid	Lipids and lipid-like molecules	Fatty Acyls	Lineolic acids and derivatives
Glyma.10G048100	M217T97_POS	-0.52185	0.0263292	RESPONSE REGULATOR OF TWO-COMPONENT SYSTEM // SUBFAMILY NOT NAMED // TWO-COMPONENT RESPONSE REGULATOR-LIKE PRR3	gamma-Glutamyl-gamma-aminobutyraldehyde	Organic acids and derivatives	Carboxylic acids and derivatives	Amino acids, peptides, and analogues
Glyma.10G048100	M223T710_NEG	-0.563013	0.0149846	RESPONSE REGULATOR OF TWO-COMPONENT SYSTEM // SUBFAMILY NOT NAMED // TWO-COMPONENT RESPONSE REGULATOR-LIKE PRR3	(+)-7-Isomethyljasmonate	Lipids and lipid-like molecules	Fatty Acyls	Lineolic acids and derivatives
Glyma.10G048100	M235T732_POS	-0.508422	0.0312038	RESPONSE REGULATOR OF TWO-COMPONENT SYSTEM // SUBFAMILY NOT NAMED // TWO-COMPONENT RESPONSE REGULATOR-LIKE PRR3	Germacrene A acid	Lipids and lipid-like molecules	Prenol lipids	Sesquiterpenoids
Glyma.10G048100	M237T724_POS	-0.607661	0.00747277	RESPONSE REGULATOR OF TWO-COMPONENT SYSTEM // SUBFAMILY NOT NAMED // TWO-COMPONENT RESPONSE REGULATOR-LIKE PRR3	Aubergenone	Lipids and lipid-like molecules	Prenol lipids	Sesquiterpenoids
Glyma.10G048100	M238T70_POS	-0.54549	0.0192075	RESPONSE REGULATOR OF TWO-COMPONENT SYSTEM // SUBFAMILY NOT NAMED // TWO-COMPONENT RESPONSE REGULATOR-LIKE PRR3	S-succinylcysteine	Organic acids and derivatives	Carboxylic acids and derivatives	Amino acids, peptides, and analogues
Glyma.10G048100	M249T727_NEG	-0.568946	0.0137356	RESPONSE REGULATOR OF TWO-COMPONENT SYSTEM // SUBFAMILY NOT NAMED // TWO-COMPONENT RESPONSE REGULATOR-LIKE PRR3	Viscic acid	Lipids and lipid-like molecules	Prenol lipids	Sesquiterpenoids
Glyma.10G048100	M252T98_POS	-0.615193	0.0065793	RESPONSE REGULATOR OF TWO-COMPONENT SYSTEM // SUBFAMILY NOT NAMED // TWO-COMPONENT RESPONSE REGULATOR-LIKE PRR3	Deoxyadenosine	Nucleosides, nucleotides, and analogues	Purine nucleosides	Purine 2'-deoxyribonucleosides
Glyma.10G048100	M258T660_POS	-0.594998	0.00919379	RESPONSE REGULATOR OF TWO-COMPONENT SYSTEM // SUBFAMILY NOT NAMED // TWO-COMPONENT RESPONSE REGULATOR-LIKE PRR3	Norcraugsodine	Benzenoids	Phenols	Benzenediols
Glyma.10G048100	M269T389_NEG	-0.519126	0.0272665	RESPONSE REGULATOR OF TWO-COMPONENT SYSTEM // SUBFAMILY NOT NAMED // TWO-COMPONENT RESPONSE REGULATOR-LIKE PRR3	4',6,7-Trihydroxyisoflavone	Phenylpropanoids and polyketides	Isoflavonoids	Isoflav-2-enes
Glyma.10G048100	M277T796_POS	-0.599916	0.00849117	RESPONSE REGULATOR OF TWO-COMPONENT SYSTEM // SUBFAMILY NOT NAMED // TWO-COMPONENT RESPONSE REGULATOR-LIKE PRR3	Dehydrocrepenynic acid	Lipids and lipid-like molecules	Fatty Acyls	Fatty acids and conjugates
Glyma.10G048100	M279T781_POS	-0.529039	0.0239757	RESPONSE REGULATOR OF TWO-COMPONENT SYSTEM // SUBFAMILY NOT NAMED // TWO-COMPONENT RESPONSE REGULATOR-LIKE PRR3	?-linolenic acid	Lipids and lipid-like molecules	Fatty Acyls	Lineolic acids and derivatives
Glyma.10G048100	M287T811_POS	-0.531877	0.023093	RESPONSE REGULATOR OF TWO-COMPONENT SYSTEM // SUBFAMILY NOT NAMED // TWO-COMPONENT RESPONSE REGULATOR-LIKE PRR3	Retinol	Lipids and lipid-like molecules	Prenol lipids	Retinoids
Glyma.10G048100	M291T743_POS	-0.608447	0.00737523	RESPONSE REGULATOR OF TWO-COMPONENT SYSTEM // SUBFAMILY NOT NAMED // TWO-COMPONENT RESPONSE REGULATOR-LIKE PRR3	Deoxy phytoprostane J1	Lipids and lipid-like molecules	Fatty Acyls	Eicosanoids
Glyma.10G048100	M295T796_POS	-0.582478	0.0111952	RESPONSE REGULATOR OF TWO-COMPONENT SYSTEM // SUBFAMILY NOT NAMED // TWO-COMPONENT RESPONSE REGULATOR-LIKE PRR3	Colneleic acid	Lipids and lipid-like molecules	Fatty Acyls	Fatty acids and conjugates
Glyma.10G048100	M305T814_POS	-0.705891	0.00106224	RESPONSE REGULATOR OF TWO-COMPONENT SYSTEM // SUBFAMILY NOT NAMED // TWO-COMPONENT RESPONSE REGULATOR-LIKE PRR3	3-Acetoxy-9-heptadecene-4,6-diyn-8-ol.	Lipids and lipid-like molecules	Fatty Acyls	Fatty alcohol esters
Glyma.10G048100	M309T934_POS	0.579092	0.0117923	RESPONSE REGULATOR OF TWO-COMPONENT SYSTEM // SUBFAMILY NOT NAMED // TWO-COMPONENT RESPONSE REGULATOR-LIKE PRR3	(R)-mevalonate diphosphate
Glyma.10G048100	M311T736_NEG	-0.607884	0.00744496	RESPONSE REGULATOR OF TWO-COMPONENT SYSTEM // SUBFAMILY NOT NAMED // TWO-COMPONENT RESPONSE REGULATOR-LIKE PRR3	13-Hydroperoxyoctadecadienoic acid	Lipids and lipid-like molecules	Fatty Acyls	Lineolic acids and derivatives
Glyma.10G048100	M313T734_NEG	-0.61067	0.00710473	RESPONSE REGULATOR OF TWO-COMPONENT SYSTEM // SUBFAMILY NOT NAMED // TWO-COMPONENT RESPONSE REGULATOR-LIKE PRR3	12,13-DHOME	Lipids and lipid-like molecules	Fatty Acyls	Fatty acids and conjugates
Glyma.10G048100	M319T495_2_POS	-0.631963	0.00489839	RESPONSE REGULATOR OF TWO-COMPONENT SYSTEM // SUBFAMILY NOT NAMED // TWO-COMPONENT RESPONSE REGULATOR-LIKE PRR3	myricetin
Glyma.10G048100	M321T683_POS	-0.584036	0.0109287	RESPONSE REGULATOR OF TWO-COMPONENT SYSTEM // SUBFAMILY NOT NAMED // TWO-COMPONENT RESPONSE REGULATOR-LIKE PRR3	MMV687706	Benzenoids	Benzene and substituted derivatives	Diphenylethers
Glyma.10G048100	M321T870_POS	-0.577582	0.0120668	RESPONSE REGULATOR OF TWO-COMPONENT SYSTEM // SUBFAMILY NOT NAMED // TWO-COMPONENT RESPONSE REGULATOR-LIKE PRR3	Anomallotusin
Glyma.10G048100	M322T702_NEG	-0.564305	0.0147054	RESPONSE REGULATOR OF TWO-COMPONENT SYSTEM // SUBFAMILY NOT NAMED // TWO-COMPONENT RESPONSE REGULATOR-LIKE PRR3	(-)-Jasmonoyl-L-isoleucine	Organic acids and derivatives	Carboxylic acids and derivatives	Amino acids, peptides, and analogues
Glyma.10G048100	M329T653_POS	-0.565428	0.0144658	RESPONSE REGULATOR OF TWO-COMPONENT SYSTEM // SUBFAMILY NOT NAMED // TWO-COMPONENT RESPONSE REGULATOR-LIKE PRR3	2,3-Dinor-8-iso prostaglandin F1alpha	Lipids and lipid-like molecules	Fatty Acyls	Eicosanoids
Glyma.10G048100	M329T783_POS	-0.693386	0.00141795	RESPONSE REGULATOR OF TWO-COMPONENT SYSTEM // SUBFAMILY NOT NAMED // TWO-COMPONENT RESPONSE REGULATOR-LIKE PRR3	(4Z,7Z,10Z,13Z,16Z,19Z)-Docosahexaenoic acid	Lipids and lipid-like molecules	Fatty Acyls	Fatty acids and conjugates
Glyma.10G048100	M331T724_POS	-0.732785	0.000542028	RESPONSE REGULATOR OF TWO-COMPONENT SYSTEM // SUBFAMILY NOT NAMED // TWO-COMPONENT RESPONSE REGULATOR-LIKE PRR3	(7Z,10Z,13Z,16Z,19Z)-Docosapentaenoic acid	Lipids and lipid-like molecules	Fatty Acyls	Fatty acids and conjugates
Glyma.10G048100	M338T700_POS	-0.670688	0.00231535	RESPONSE REGULATOR OF TWO-COMPONENT SYSTEM // SUBFAMILY NOT NAMED // TWO-COMPONENT RESPONSE REGULATOR-LIKE PRR3	5-Hydroxymethyldeoxycytidylate	Nucleosides, nucleotides, and analogues	Pyrimidine nucleotides	Pyrimidine deoxyribonucleotides
Glyma.10G048100	M345T861_POS	-0.724585	0.000670792	RESPONSE REGULATOR OF TWO-COMPONENT SYSTEM // SUBFAMILY NOT NAMED // TWO-COMPONENT RESPONSE REGULATOR-LIKE PRR3	SB 205607	Organoheterocyclic compounds	Quinolines and derivatives	Phenylquinolines
Glyma.10G048100	M346T860_POS	-0.608842	0.0073265	RESPONSE REGULATOR OF TWO-COMPONENT SYSTEM // SUBFAMILY NOT NAMED // TWO-COMPONENT RESPONSE REGULATOR-LIKE PRR3	cyclic pyranopterin phosphate
Glyma.10G048100	M347T786_POS	-0.859934	4.75471e-06	RESPONSE REGULATOR OF TWO-COMPONENT SYSTEM // SUBFAMILY NOT NAMED // TWO-COMPONENT RESPONSE REGULATOR-LIKE PRR3	Corticosterone	Lipids and lipid-like molecules	Steroids and steroid derivatives	Hydroxysteroids
Glyma.10G048100	M349T687_POS	-0.525285	0.0251832	RESPONSE REGULATOR OF TWO-COMPONENT SYSTEM // SUBFAMILY NOT NAMED // TWO-COMPONENT RESPONSE REGULATOR-LIKE PRR3	Gibberellin A111	Lipids and lipid-like molecules	Prenol lipids	Diterpenoids
Glyma.10G048100	M350T742_POS	-0.523854	0.0256559	RESPONSE REGULATOR OF TWO-COMPONENT SYSTEM // SUBFAMILY NOT NAMED // TWO-COMPONENT RESPONSE REGULATOR-LIKE PRR3	1-(2-carboxyphenylamino)-1-deoxy-D-ribulose 5-phosphate
Glyma.10G048100	M353T693_POS	-0.503456	0.0331735	RESPONSE REGULATOR OF TWO-COMPONENT SYSTEM // SUBFAMILY NOT NAMED // TWO-COMPONENT RESPONSE REGULATOR-LIKE PRR3	Anileridine	Organoheterocyclic compounds	Piperidines	Phenylpiperidines
Glyma.10G048100	M363T922_NEG	-0.664648	0.00262029	RESPONSE REGULATOR OF TWO-COMPONENT SYSTEM // SUBFAMILY NOT NAMED // TWO-COMPONENT RESPONSE REGULATOR-LIKE PRR3	XMP
Glyma.10G048100	M365T646_NEG	-0.51532	0.0286195	RESPONSE REGULATOR OF TWO-COMPONENT SYSTEM // SUBFAMILY NOT NAMED // TWO-COMPONENT RESPONSE REGULATOR-LIKE PRR3	Ferulenol
Glyma.10G048100	M379T522_NEG	-0.523721	0.0257	RESPONSE REGULATOR OF TWO-COMPONENT SYSTEM // SUBFAMILY NOT NAMED // TWO-COMPONENT RESPONSE REGULATOR-LIKE PRR3	Kinocoumarin	Phenylpropanoids and polyketides	Coumarins and derivatives	Pyranocoumarins
Glyma.10G048100	M391T699_NEG	-0.647543	0.00366756	RESPONSE REGULATOR OF TWO-COMPONENT SYSTEM // SUBFAMILY NOT NAMED // TWO-COMPONENT RESPONSE REGULATOR-LIKE PRR3	5-O-Demethylnobiletin
Glyma.10G048100	M613T608_NEG	-0.569479	0.0136276	RESPONSE REGULATOR OF TWO-COMPONENT SYSTEM // SUBFAMILY NOT NAMED // TWO-COMPONENT RESPONSE REGULATOR-LIKE PRR3	Neomycin B	Organic oxygen compounds	Organooxygen compounds	Carbohydrates and carbohydrate conjugates
Glyma.10G048100	M640T413_POS	-0.501917	0.0338029	RESPONSE REGULATOR OF TWO-COMPONENT SYSTEM // SUBFAMILY NOT NAMED // TWO-COMPONENT RESPONSE REGULATOR-LIKE PRR3	Demethyl-desacetyl-rifamycin S	Phenylpropanoids and polyketides	Macrolactams	NA
Glyma.10G048100	M663T682_POS	0.674614	0.00213332	RESPONSE REGULATOR OF TWO-COMPONENT SYSTEM // SUBFAMILY NOT NAMED // TWO-COMPONENT RESPONSE REGULATOR-LIKE PRR3	Prosapogenin	Lipids and lipid-like molecules	Prenol lipids	Terpene glycosides
Glyma.10G048100	M911T711_POS	-0.517879	0.0277042	RESPONSE REGULATOR OF TWO-COMPONENT SYSTEM // SUBFAMILY NOT NAMED // TWO-COMPONENT RESPONSE REGULATOR-LIKE PRR3	Soyasaponin Bg	Lipids and lipid-like molecules	Prenol lipids	Terpene glycosides
Glyma.10G048100	M913T695_NEG	-0.567355	0.0140622	RESPONSE REGULATOR OF TWO-COMPONENT SYSTEM // SUBFAMILY NOT NAMED // TWO-COMPONENT RESPONSE REGULATOR-LIKE PRR3	Abutiloside H	Lipids and lipid-like molecules	Steroids and steroid derivatives	Steroidal glycosides
Glyma.10G048100	M915T695_NEG	-0.612827	0.00685009	RESPONSE REGULATOR OF TWO-COMPONENT SYSTEM // SUBFAMILY NOT NAMED // TWO-COMPONENT RESPONSE REGULATOR-LIKE PRR3	Abutiloside B	Lipids and lipid-like molecules	Steroids and steroid derivatives	Steroidal glycosides
Glyma.10G048100	M974T533_3_POS	-0.593161	0.00946797	RESPONSE REGULATOR OF TWO-COMPONENT SYSTEM // SUBFAMILY NOT NAMED // TWO-COMPONENT RESPONSE REGULATOR-LIKE PRR3	Sinapoyl-CoA	Lipids and lipid-like molecules	Fatty Acyls	Fatty acyl thioesters
Glyma.11G148362	M1028T698_NEG	-0.549384	0.0181965	RESPONSE REGULATOR OF TWO-COMPONENT SYSTEM // TWO-COMPONENT RESPONSE REGULATOR-LIKE PRR3	3-(4'O-Malonyl)Rha(1-2)Gal(1-2)GluA-Soyasaponenol B	Lipids and lipid-like molecules	Prenol lipids	Terpene glycosides
Glyma.11G148362	M1030T697_NEG	-0.573935	0.0127505	RESPONSE REGULATOR OF TWO-COMPONENT SYSTEM // TWO-COMPONENT RESPONSE REGULATOR-LIKE PRR3	Solasodoside A	Lipids and lipid-like molecules	Steroids and steroid derivatives	Steroidal glycosides
Glyma.11G148362	M1031T697_NEG	-0.572444	0.0130388	RESPONSE REGULATOR OF TWO-COMPONENT SYSTEM // TWO-COMPONENT RESPONSE REGULATOR-LIKE PRR3	Dehydrotomatine	Lipids and lipid-like molecules	Steroids and steroid derivatives	Steroidal glycosides
Glyma.11G148362	M110T938_POS	-0.516914	0.0280468	RESPONSE REGULATOR OF TWO-COMPONENT SYSTEM // TWO-COMPONENT RESPONSE REGULATOR-LIKE PRR3	(S)-2-chloropropanoate
Glyma.11G148362	M114T73_POS	0.570226	0.0134773	RESPONSE REGULATOR OF TWO-COMPONENT SYSTEM // TWO-COMPONENT RESPONSE REGULATOR-LIKE PRR3	(S)-1-Pyrroline-5-carboxylate	Organic acids and derivatives	Carboxylic acids and derivatives	Amino acids, peptides, and analogues
Glyma.11G148362	M135T68_NEG	0.54044	0.0205836	RESPONSE REGULATOR OF TWO-COMPONENT SYSTEM // TWO-COMPONENT RESPONSE REGULATOR-LIKE PRR3	Threonic acid	Organic oxygen compounds	Organooxygen compounds	Carbohydrates and carbohydrate conjugates
Glyma.11G148362	M148T929_NEG	0.561684	0.0152764	RESPONSE REGULATOR OF TWO-COMPONENT SYSTEM // TWO-COMPONENT RESPONSE REGULATOR-LIKE PRR3	Benzyl isothiocyanate	Benzenoids	Benzene and substituted derivatives
Glyma.11G148362	M151T762_POS	-0.614385	0.00667084	RESPONSE REGULATOR OF TWO-COMPONENT SYSTEM // TWO-COMPONENT RESPONSE REGULATOR-LIKE PRR3	Thymol	Lipids and lipid-like molecules	Prenol lipids	Monoterpenoids
Glyma.11G148362	M157T938_POS	-0.57521	0.0125081	RESPONSE REGULATOR OF TWO-COMPONENT SYSTEM // TWO-COMPONENT RESPONSE REGULATOR-LIKE PRR3	2-Phosphoglycolate	Organic acids and derivatives	Organic phosphoric acids and derivatives	Phosphate esters
Glyma.11G148362	M169T761_POS	-0.63013	0.00506294	RESPONSE REGULATOR OF TWO-COMPONENT SYSTEM // TWO-COMPONENT RESPONSE REGULATOR-LIKE PRR3	6-Hydroxy-2,6-dimethyl-2,7-octadien-4-one	Lipids and lipid-like molecules	Prenol lipids	Monoterpenoids
Glyma.11G148362	M171T390_NEG	-0.578633	0.0118753	RESPONSE REGULATOR OF TWO-COMPONENT SYSTEM // TWO-COMPONENT RESPONSE REGULATOR-LIKE PRR3	1,4-Cyclohexanedicarboxylic acid	Organic acids and derivatives	Carboxylic acids and derivatives	Dicarboxylic acids and derivatives
Glyma.11G148362	M172T390_NEG	-0.555839	0.0166139	RESPONSE REGULATOR OF TWO-COMPONENT SYSTEM // TWO-COMPONENT RESPONSE REGULATOR-LIKE PRR3	5-Guanidino-2-oxopentanoate	Organic acids and derivatives	Keto acids and derivatives	Short-chain keto acids and derivatives
Glyma.11G148362	M175T68_NEG	-0.510067	0.0305717	RESPONSE REGULATOR OF TWO-COMPONENT SYSTEM // TWO-COMPONENT RESPONSE REGULATOR-LIKE PRR3	Allantoate	Organic acids and derivatives	Carboxylic acids and derivatives	Amino acids, peptides, and analogues
Glyma.11G148362	M189T697_POS	0.636023	0.00454924	RESPONSE REGULATOR OF TWO-COMPONENT SYSTEM // TWO-COMPONENT RESPONSE REGULATOR-LIKE PRR3	7,8-Diaminononanoate	Lipids and lipid-like molecules	Fatty Acyls	Fatty acids and conjugates
Glyma.11G148362	M191T595_POS	-0.558009	0.0161071	RESPONSE REGULATOR OF TWO-COMPONENT SYSTEM // TWO-COMPONENT RESPONSE REGULATOR-LIKE PRR3	beta-Damascenone	Organic oxygen compounds	Organooxygen compounds	Carbonyl compounds
Glyma.11G148362	M193T405_POS	0.521687	0.0263845	RESPONSE REGULATOR OF TWO-COMPONENT SYSTEM // TWO-COMPONENT RESPONSE REGULATOR-LIKE PRR3	Myristicin	Organoheterocyclic compounds	Benzodioxoles
Glyma.11G148362	M193T806_POS	-0.584168	0.0109064	RESPONSE REGULATOR OF TWO-COMPONENT SYSTEM // TWO-COMPONENT RESPONSE REGULATOR-LIKE PRR3	Vitispirane	Organoheterocyclic compounds	Tetrahydrofurans
Glyma.11G148362	M199T446_POS	-0.556631	0.0164273	RESPONSE REGULATOR OF TWO-COMPONENT SYSTEM // TWO-COMPONENT RESPONSE REGULATOR-LIKE PRR3	Hercynine	Organic acids and derivatives	Carboxylic acids and derivatives	Amino acids, peptides, and analogues
Glyma.11G148362	M201T74_POS	-0.575328	0.0124858	RESPONSE REGULATOR OF TWO-COMPONENT SYSTEM // TWO-COMPONENT RESPONSE REGULATOR-LIKE PRR3	D-erythrose 4-phosphate
Glyma.11G148362	M203T697_POS	0.600734	0.00837858	RESPONSE REGULATOR OF TWO-COMPONENT SYSTEM // TWO-COMPONENT RESPONSE REGULATOR-LIKE PRR3	alpha-Curcumene	Lipids and lipid-like molecules	Prenol lipids	Sesquiterpenoids
Glyma.11G148362	M204T796_POS	0.585881	0.0106196	RESPONSE REGULATOR OF TWO-COMPONENT SYSTEM // TWO-COMPONENT RESPONSE REGULATOR-LIKE PRR3	Crotamiton	Benzenoids	Benzene and substituted derivatives	Anilides
Glyma.11G148362	M205T228_NEG	-0.599052	0.00861126	RESPONSE REGULATOR OF TWO-COMPONENT SYSTEM // TWO-COMPONENT RESPONSE REGULATOR-LIKE PRR3	(2S,3R)-3-Hydroxybutane-1,2,3-tricarboxylate	Organic acids and derivatives	Carboxylic acids and derivatives	Tricarboxylic acids and derivatives
Glyma.11G148362	M205T928_NEG	0.526832	0.0246798	RESPONSE REGULATOR OF TWO-COMPONENT SYSTEM // TWO-COMPONENT RESPONSE REGULATOR-LIKE PRR3	3-Oxalomalate	Organic acids and derivatives	Carboxylic acids and derivatives	Tricarboxylic acids and derivatives
Glyma.11G148362	M209T604_POS	-0.517865	0.0277091	RESPONSE REGULATOR OF TWO-COMPONENT SYSTEM // TWO-COMPONENT RESPONSE REGULATOR-LIKE PRR3	alpha-Asarone	Benzenoids	Phenol ethers	Anisoles
Glyma.11G148362	M215T194_POS	-0.602312	0.00816487	RESPONSE REGULATOR OF TWO-COMPONENT SYSTEM // TWO-COMPONENT RESPONSE REGULATOR-LIKE PRR3	Dethiobiotin	Lipids and lipid-like molecules	Fatty Acyls	Fatty acids and conjugates
Glyma.11G148362	M218T131_NEG	0.507911	0.0314024	RESPONSE REGULATOR OF TWO-COMPONENT SYSTEM // TWO-COMPONENT RESPONSE REGULATOR-LIKE PRR3	D-Pantothenic acid	Organic oxygen compounds	Organooxygen compounds	Alcohols and polyols
Glyma.11G148362	M229T213_NEG	0.524125	0.0255659	RESPONSE REGULATOR OF TWO-COMPONENT SYSTEM // TWO-COMPONENT RESPONSE REGULATOR-LIKE PRR3	C20817	Organoheterocyclic compounds	Lactams	Beta lactams
Glyma.11G148362	M237T431_POS	0.535092	0.0221243	RESPONSE REGULATOR OF TWO-COMPONENT SYSTEM // TWO-COMPONENT RESPONSE REGULATOR-LIKE PRR3	Capsidiol	Lipids and lipid-like molecules	Prenol lipids	Sesquiterpenoids
Glyma.11G148362	M238T70_POS	-0.646714	0.00372594	RESPONSE REGULATOR OF TWO-COMPONENT SYSTEM // TWO-COMPONENT RESPONSE REGULATOR-LIKE PRR3	S-succinylcysteine	Organic acids and derivatives	Carboxylic acids and derivatives	Amino acids, peptides, and analogues
Glyma.11G148362	M243T798_NEG	-0.545483	0.0192092	RESPONSE REGULATOR OF TWO-COMPONENT SYSTEM // TWO-COMPONENT RESPONSE REGULATOR-LIKE PRR3	beta-Hydroxymyristic acid	Lipids and lipid-like molecules	Fatty Acyls	Fatty acids and conjugates
Glyma.11G148362	M249T727_NEG	-0.571978	0.0131299	RESPONSE REGULATOR OF TWO-COMPONENT SYSTEM // TWO-COMPONENT RESPONSE REGULATOR-LIKE PRR3	Viscic acid	Lipids and lipid-like molecules	Prenol lipids	Sesquiterpenoids
Glyma.11G148362	M252T98_POS	-0.598416	0.00870069	RESPONSE REGULATOR OF TWO-COMPONENT SYSTEM // TWO-COMPONENT RESPONSE REGULATOR-LIKE PRR3	Deoxyadenosine	Nucleosides, nucleotides, and analogues	Purine nucleosides	Purine 2'-deoxyribonucleosides
Glyma.11G148362	M256T737_POS	-0.505317	0.0324245	RESPONSE REGULATOR OF TWO-COMPONENT SYSTEM // TWO-COMPONENT RESPONSE REGULATOR-LIKE PRR3	indolepropanol phosphate
Glyma.11G148362	M260T414_NEG	-0.512908	0.0295037	RESPONSE REGULATOR OF TWO-COMPONENT SYSTEM // TWO-COMPONENT RESPONSE REGULATOR-LIKE PRR3	Lotaustralin	Organic oxygen compounds	Organooxygen compounds	Carbohydrates and carbohydrate conjugates
Glyma.11G148362	M267T518_POS	0.634081	0.00471358	RESPONSE REGULATOR OF TWO-COMPONENT SYSTEM // TWO-COMPONENT RESPONSE REGULATOR-LIKE PRR3	3,14-Dihydroxy-11,13-dihydrocostunolide	Lipids and lipid-like molecules	Prenol lipids	Terpene lactones
Glyma.11G148362	M269T389_NEG	-0.633365	0.00477542	RESPONSE REGULATOR OF TWO-COMPONENT SYSTEM // TWO-COMPONENT RESPONSE REGULATOR-LIKE PRR3	4',6,7-Trihydroxyisoflavone	Phenylpropanoids and polyketides	Isoflavonoids	Isoflav-2-enes
Glyma.11G148362	M277T796_POS	-0.583485	0.0110224	RESPONSE REGULATOR OF TWO-COMPONENT SYSTEM // TWO-COMPONENT RESPONSE REGULATOR-LIKE PRR3	Dehydrocrepenynic acid	Lipids and lipid-like molecules	Fatty Acyls	Fatty acids and conjugates
Glyma.11G148362	M279T781_POS	-0.58622	0.0105638	RESPONSE REGULATOR OF TWO-COMPONENT SYSTEM // TWO-COMPONENT RESPONSE REGULATOR-LIKE PRR3	?-linolenic acid	Lipids and lipid-like molecules	Fatty Acyls	Lineolic acids and derivatives
Glyma.11G148362	M287T811_POS	-0.577125	0.0121508	RESPONSE REGULATOR OF TWO-COMPONENT SYSTEM // TWO-COMPONENT RESPONSE REGULATOR-LIKE PRR3	Retinol	Lipids and lipid-like molecules	Prenol lipids	Retinoids
Glyma.11G148362	M291T743_POS	-0.619422	0.00611697	RESPONSE REGULATOR OF TWO-COMPONENT SYSTEM // TWO-COMPONENT RESPONSE REGULATOR-LIKE PRR3	Deoxy phytoprostane J1	Lipids and lipid-like molecules	Fatty Acyls	Eicosanoids
Glyma.11G148362	M295T796_POS	-0.585052	0.0107576	RESPONSE REGULATOR OF TWO-COMPONENT SYSTEM // TWO-COMPONENT RESPONSE REGULATOR-LIKE PRR3	Colneleic acid	Lipids and lipid-like molecules	Fatty Acyls	Fatty acids and conjugates
Glyma.11G148362	M303T499_3_POS	0.624989	0.00554884	RESPONSE REGULATOR OF TWO-COMPONENT SYSTEM // TWO-COMPONENT RESPONSE REGULATOR-LIKE PRR3	Abietic acid	Lipids and lipid-like molecules	Prenol lipids	Diterpenoids
Glyma.11G148362	M303T840_NEG	0.585759	0.0106399	RESPONSE REGULATOR OF TWO-COMPONENT SYSTEM // TWO-COMPONENT RESPONSE REGULATOR-LIKE PRR3	Discadenine	Organic acids and derivatives	Carboxylic acids and derivatives	Amino acids, peptides, and analogues
Glyma.11G148362	M305T814_POS	-0.705643	0.00106847	RESPONSE REGULATOR OF TWO-COMPONENT SYSTEM // TWO-COMPONENT RESPONSE REGULATOR-LIKE PRR3	3-Acetoxy-9-heptadecene-4,6-diyn-8-ol.	Lipids and lipid-like molecules	Fatty Acyls	Fatty alcohol esters
Glyma.11G148362	M308T421_POS	0.551554	0.0176518	RESPONSE REGULATOR OF TWO-COMPONENT SYSTEM // TWO-COMPONENT RESPONSE REGULATOR-LIKE PRR3	Dihydroascorbigen	Organoheterocyclic compounds	Indoles and derivatives	Indoles
Glyma.11G148362	M309T934_POS	0.529831	0.0237268	RESPONSE REGULATOR OF TWO-COMPONENT SYSTEM // TWO-COMPONENT RESPONSE REGULATOR-LIKE PRR3	(R)-mevalonate diphosphate
Glyma.11G148362	M313T734_NEG	-0.698296	0.00126804	RESPONSE REGULATOR OF TWO-COMPONENT SYSTEM // TWO-COMPONENT RESPONSE REGULATOR-LIKE PRR3	12,13-DHOME	Lipids and lipid-like molecules	Fatty Acyls	Fatty acids and conjugates
Glyma.11G148362	M321T870_POS	-0.600114	0.00846378	RESPONSE REGULATOR OF TWO-COMPONENT SYSTEM // TWO-COMPONENT RESPONSE REGULATOR-LIKE PRR3	Anomallotusin
Glyma.11G148362	M322T702_NEG	-0.60529	0.00777344	RESPONSE REGULATOR OF TWO-COMPONENT SYSTEM // TWO-COMPONENT RESPONSE REGULATOR-LIKE PRR3	(-)-Jasmonoyl-L-isoleucine	Organic acids and derivatives	Carboxylic acids and derivatives	Amino acids, peptides, and analogues
Glyma.11G148362	M329T783_POS	-0.612024	0.006944	RESPONSE REGULATOR OF TWO-COMPONENT SYSTEM // TWO-COMPONENT RESPONSE REGULATOR-LIKE PRR3	(4Z,7Z,10Z,13Z,16Z,19Z)-Docosahexaenoic acid	Lipids and lipid-like molecules	Fatty Acyls	Fatty acids and conjugates
Glyma.11G148362	M331T724_POS	-0.642312	0.00404872	RESPONSE REGULATOR OF TWO-COMPONENT SYSTEM // TWO-COMPONENT RESPONSE REGULATOR-LIKE PRR3	(7Z,10Z,13Z,16Z,19Z)-Docosapentaenoic acid	Lipids and lipid-like molecules	Fatty Acyls	Fatty acids and conjugates
Glyma.11G148362	M335T421_POS	0.508124	0.0313193	RESPONSE REGULATOR OF TWO-COMPONENT SYSTEM // TWO-COMPONENT RESPONSE REGULATOR-LIKE PRR3	Gibberellin A10	Lipids and lipid-like molecules	Prenol lipids	Diterpenoids
Glyma.11G148362	M338T700_POS	-0.573269	0.0128786	RESPONSE REGULATOR OF TWO-COMPONENT SYSTEM // TWO-COMPONENT RESPONSE REGULATOR-LIKE PRR3	5-Hydroxymethyldeoxycytidylate	Nucleosides, nucleotides, and analogues	Pyrimidine nucleotides	Pyrimidine deoxyribonucleotides
Glyma.11G148362	M339T419_POS	0.672591	0.00222562	RESPONSE REGULATOR OF TWO-COMPONENT SYSTEM // TWO-COMPONENT RESPONSE REGULATOR-LIKE PRR3	1-Caffeoyl-4-deoxyquinic acid	Phenylpropanoids and polyketides	Cinnamic acids and derivatives	Hydroxycinnamic acids and derivatives
Glyma.11G148362	M345T861_POS	-0.619035	0.00615812	RESPONSE REGULATOR OF TWO-COMPONENT SYSTEM // TWO-COMPONENT RESPONSE REGULATOR-LIKE PRR3	SB 205607	Organoheterocyclic compounds	Quinolines and derivatives	Phenylquinolines
Glyma.11G148362	M346T860_POS	-0.624026	0.00564387	RESPONSE REGULATOR OF TWO-COMPONENT SYSTEM // TWO-COMPONENT RESPONSE REGULATOR-LIKE PRR3	cyclic pyranopterin phosphate
Glyma.11G148362	M347T786_POS	-0.80576	5.42767e-05	RESPONSE REGULATOR OF TWO-COMPONENT SYSTEM // TWO-COMPONENT RESPONSE REGULATOR-LIKE PRR3	Corticosterone	Lipids and lipid-like molecules	Steroids and steroid derivatives	Hydroxysteroids
Glyma.11G148362	M350T742_POS	-0.528413	0.0241739	RESPONSE REGULATOR OF TWO-COMPONENT SYSTEM // TWO-COMPONENT RESPONSE REGULATOR-LIKE PRR3	1-(2-carboxyphenylamino)-1-deoxy-D-ribulose 5-phosphate
Glyma.11G148362	M353T649_1_POS	0.589402	0.0100495	RESPONSE REGULATOR OF TWO-COMPONENT SYSTEM // TWO-COMPONENT RESPONSE REGULATOR-LIKE PRR3	Citrusinol	Phenylpropanoids and polyketides	Flavonoids	Pyranoflavonoids
Glyma.11G148362	M363T922_NEG	-0.597348	0.00885237	RESPONSE REGULATOR OF TWO-COMPONENT SYSTEM // TWO-COMPONENT RESPONSE REGULATOR-LIKE PRR3	XMP
Glyma.11G148362	M384T368_NEG	0.534482	0.0223056	RESPONSE REGULATOR OF TWO-COMPONENT SYSTEM // TWO-COMPONENT RESPONSE REGULATOR-LIKE PRR3	Buntanmine A	Organoheterocyclic compounds	Quinolines and derivatives	Benzoquinolines
Glyma.11G148362	M391T699_NEG	-0.624823	0.0055651	RESPONSE REGULATOR OF TWO-COMPONENT SYSTEM // TWO-COMPONENT RESPONSE REGULATOR-LIKE PRR3	5-O-Demethylnobiletin
Glyma.11G148362	M402T364_POS	0.570805	0.0133616	RESPONSE REGULATOR OF TWO-COMPONENT SYSTEM // TWO-COMPONENT RESPONSE REGULATOR-LIKE PRR3	Moxifloxacin	Organoheterocyclic compounds	Quinolines and derivatives	Quinoline carboxylic acids
Glyma.11G148362	M417T438_POS	-0.501612	0.0339288	RESPONSE REGULATOR OF TWO-COMPONENT SYSTEM // TWO-COMPONENT RESPONSE REGULATOR-LIKE PRR3	Daidzein-8-C-glucoside	Phenylpropanoids and polyketides	Isoflavonoids	Isoflavonoid C-glycosides
Glyma.11G148362	M456T345_NEG	0.53222	0.0229883	RESPONSE REGULATOR OF TWO-COMPONENT SYSTEM // TWO-COMPONENT RESPONSE REGULATOR-LIKE PRR3	Amygdalin	Organic oxygen compounds	Organooxygen compounds	Carbohydrates and carbohydrate conjugates
Glyma.11G148362	M457T870_POS	-0.50681	0.0318331	RESPONSE REGULATOR OF TWO-COMPONENT SYSTEM // TWO-COMPONENT RESPONSE REGULATOR-LIKE PRR3	Oleanolic acid	Lipids and lipid-like molecules	Prenol lipids	Triterpenoids
Glyma.11G148362	M462T445_POS	0.51817	0.0276016	RESPONSE REGULATOR OF TWO-COMPONENT SYSTEM // TWO-COMPONENT RESPONSE REGULATOR-LIKE PRR3	D-Glucosylsphingosine	Lipids and lipid-like molecules	Sphingolipids	Glycosphingolipids
Glyma.11G148362	M483T518_POS	0.625866	0.00546341	RESPONSE REGULATOR OF TWO-COMPONENT SYSTEM // TWO-COMPONENT RESPONSE REGULATOR-LIKE PRR3	Gentamicin X2	Organic oxygen compounds	Organooxygen compounds	Carbohydrates and carbohydrate conjugates
Glyma.11G148362	M567T517_2_POS	0.526	0.0249495	RESPONSE REGULATOR OF TWO-COMPONENT SYSTEM // TWO-COMPONENT RESPONSE REGULATOR-LIKE PRR3	3-hydroxyechinenone	Lipids and lipid-like molecules	Prenol lipids	Tetraterpenoids
Glyma.11G148362	M575T466_POS	0.55639	0.016484	RESPONSE REGULATOR OF TWO-COMPONENT SYSTEM // TWO-COMPONENT RESPONSE REGULATOR-LIKE PRR3	Stigmasterol-3-O-beta-D-glucopyranoside	Lipids and lipid-like molecules	Steroids and steroid derivatives	Stigmastanes and derivatives
Glyma.11G148362	M578T517_POS	0.511247	0.0301244	RESPONSE REGULATOR OF TWO-COMPONENT SYSTEM // TWO-COMPONENT RESPONSE REGULATOR-LIKE PRR3	C37-phenolphthiocerol A
Glyma.11G148362	M663T682_POS	0.642129	0.0040626	RESPONSE REGULATOR OF TWO-COMPONENT SYSTEM // TWO-COMPONENT RESPONSE REGULATOR-LIKE PRR3	Prosapogenin	Lipids and lipid-like molecules	Prenol lipids	Terpene glycosides
Glyma.11G148362	M852T507_POS	0.54399	0.0196084	RESPONSE REGULATOR OF TWO-COMPONENT SYSTEM // TWO-COMPONENT RESPONSE REGULATOR-LIKE PRR3	3-demethylubiquinol-10
Glyma.11G148362	M883T701_NEG	-0.577044	0.0121657	RESPONSE REGULATOR OF TWO-COMPONENT SYSTEM // TWO-COMPONENT RESPONSE REGULATOR-LIKE PRR3	Pennogenin 3-O-beta-chacotrioside	Lipids and lipid-like molecules	Steroids and steroid derivatives	Steroidal glycosides
Glyma.11G148362	M894T716_POS	0.528818	0.0240455	RESPONSE REGULATOR OF TWO-COMPONENT SYSTEM // TWO-COMPONENT RESPONSE REGULATOR-LIKE PRR3	chlorophyll a
Glyma.11G148362	M913T695_NEG	-0.605118	0.00779556	RESPONSE REGULATOR OF TWO-COMPONENT SYSTEM // TWO-COMPONENT RESPONSE REGULATOR-LIKE PRR3	Abutiloside H	Lipids and lipid-like molecules	Steroids and steroid derivatives	Steroidal glycosides
Glyma.11G148362	M915T695_NEG	-0.549956	0.0180518	RESPONSE REGULATOR OF TWO-COMPONENT SYSTEM // TWO-COMPONENT RESPONSE REGULATOR-LIKE PRR3	Abutiloside B	Lipids and lipid-like molecules	Steroids and steroid derivatives	Steroidal glycosides
Glyma.11G148362	M949T697_NEG	-0.576325	0.0122991	RESPONSE REGULATOR OF TWO-COMPONENT SYSTEM // TWO-COMPONENT RESPONSE REGULATOR-LIKE PRR3	Zn-Bacteriochlorophyll a
Glyma.11G148362	M974T533_3_POS	-0.626019	0.00544852	RESPONSE REGULATOR OF TWO-COMPONENT SYSTEM // TWO-COMPONENT RESPONSE REGULATOR-LIKE PRR3	Sinapoyl-CoA	Lipids and lipid-like molecules	Fatty Acyls	Fatty acyl thioesters
Glyma.12G073900	M1028T698_NEG	-0.527972	0.0243141	RESPONSE REGULATOR OF TWO-COMPONENT SYSTEM // TWO-COMPONENT RESPONSE REGULATOR-LIKE PRR3	3-(4'O-Malonyl)Rha(1-2)Gal(1-2)GluA-Soyasaponenol B	Lipids and lipid-like molecules	Prenol lipids	Terpene glycosides
Glyma.12G073900	M1030T697_NEG	-0.551888	0.017569	RESPONSE REGULATOR OF TWO-COMPONENT SYSTEM // TWO-COMPONENT RESPONSE REGULATOR-LIKE PRR3	Solasodoside A	Lipids and lipid-like molecules	Steroids and steroid derivatives	Steroidal glycosides
Glyma.12G073900	M1031T697_NEG	-0.539926	0.020728	RESPONSE REGULATOR OF TWO-COMPONENT SYSTEM // TWO-COMPONENT RESPONSE REGULATOR-LIKE PRR3	Dehydrotomatine	Lipids and lipid-like molecules	Steroids and steroid derivatives	Steroidal glycosides
Glyma.12G073900	M120T938_POS	-0.56335	0.0149115	RESPONSE REGULATOR OF TWO-COMPONENT SYSTEM // TWO-COMPONENT RESPONSE REGULATOR-LIKE PRR3	N-Carboxyglycine	Organic acids and derivatives	Carboxylic acids and derivatives	Amino acids, peptides, and analogues
Glyma.12G073900	M125T937_POS	0.523605	0.0257388	RESPONSE REGULATOR OF TWO-COMPONENT SYSTEM // TWO-COMPONENT RESPONSE REGULATOR-LIKE PRR3	3-chloro-L-alanine
Glyma.12G073900	M151T762_POS	-0.566525	0.0142349	RESPONSE REGULATOR OF TWO-COMPONENT SYSTEM // TWO-COMPONENT RESPONSE REGULATOR-LIKE PRR3	Thymol	Lipids and lipid-like molecules	Prenol lipids	Monoterpenoids
Glyma.12G073900	M169T761_POS	-0.613951	0.00672036	RESPONSE REGULATOR OF TWO-COMPONENT SYSTEM // TWO-COMPONENT RESPONSE REGULATOR-LIKE PRR3	6-Hydroxy-2,6-dimethyl-2,7-octadien-4-one	Lipids and lipid-like molecules	Prenol lipids	Monoterpenoids
Glyma.12G073900	M171T390_NEG	-0.579259	0.0117623	RESPONSE REGULATOR OF TWO-COMPONENT SYSTEM // TWO-COMPONENT RESPONSE REGULATOR-LIKE PRR3	1,4-Cyclohexanedicarboxylic acid	Organic acids and derivatives	Carboxylic acids and derivatives	Dicarboxylic acids and derivatives
Glyma.12G073900	M172T390_NEG	-0.57057	0.0134086	RESPONSE REGULATOR OF TWO-COMPONENT SYSTEM // TWO-COMPONENT RESPONSE REGULATOR-LIKE PRR3	5-Guanidino-2-oxopentanoate	Organic acids and derivatives	Keto acids and derivatives	Short-chain keto acids and derivatives
Glyma.12G073900	M191T595_POS	-0.596516	0.00897204	RESPONSE REGULATOR OF TWO-COMPONENT SYSTEM // TWO-COMPONENT RESPONSE REGULATOR-LIKE PRR3	beta-Damascenone	Organic oxygen compounds	Organooxygen compounds	Carbonyl compounds
Glyma.12G073900	M193T806_POS	-0.603638	0.00798858	RESPONSE REGULATOR OF TWO-COMPONENT SYSTEM // TWO-COMPONENT RESPONSE REGULATOR-LIKE PRR3	Vitispirane	Organoheterocyclic compounds	Tetrahydrofurans
Glyma.12G073900	M196T784_POS	0.539968	0.0207162	RESPONSE REGULATOR OF TWO-COMPONENT SYSTEM // TWO-COMPONENT RESPONSE REGULATOR-LIKE PRR3	D,L-alpha-methylphosphinothricin
Glyma.12G073900	M199T446_POS	-0.636563	0.00450441	RESPONSE REGULATOR OF TWO-COMPONENT SYSTEM // TWO-COMPONENT RESPONSE REGULATOR-LIKE PRR3	Hercynine	Organic acids and derivatives	Carboxylic acids and derivatives	Amino acids, peptides, and analogues
Glyma.12G073900	M201T74_POS	-0.610341	0.00714434	RESPONSE REGULATOR OF TWO-COMPONENT SYSTEM // TWO-COMPONENT RESPONSE REGULATOR-LIKE PRR3	D-erythrose 4-phosphate
Glyma.12G073900	M205T228_NEG	-0.542761	0.0199418	RESPONSE REGULATOR OF TWO-COMPONENT SYSTEM // TWO-COMPONENT RESPONSE REGULATOR-LIKE PRR3	(2S,3R)-3-Hydroxybutane-1,2,3-tricarboxylate	Organic acids and derivatives	Carboxylic acids and derivatives	Tricarboxylic acids and derivatives
Glyma.12G073900	M207T711_POS	-0.544581	0.0194497	RESPONSE REGULATOR OF TWO-COMPONENT SYSTEM // TWO-COMPONENT RESPONSE REGULATOR-LIKE PRR3	Etrogol	Benzenoids	Phenols	Tyrosols and derivatives
Glyma.12G073900	M209T604_POS	-0.550188	0.0179931	RESPONSE REGULATOR OF TWO-COMPONENT SYSTEM // TWO-COMPONENT RESPONSE REGULATOR-LIKE PRR3	alpha-Asarone	Benzenoids	Phenol ethers	Anisoles
Glyma.12G073900	M232T70_NEG	-0.505835	0.0322183	RESPONSE REGULATOR OF TWO-COMPONENT SYSTEM // TWO-COMPONENT RESPONSE REGULATOR-LIKE PRR3	2,3-Dihydro-3-hydroxy-3-methylthiazolo[3,2-a]indole-9-carboxaldehyde	Organoheterocyclic compounds	Indoles and derivatives	Indoles
Glyma.12G073900	M238T70_POS	-0.564435	0.0146773	RESPONSE REGULATOR OF TWO-COMPONENT SYSTEM // TWO-COMPONENT RESPONSE REGULATOR-LIKE PRR3	S-succinylcysteine	Organic acids and derivatives	Carboxylic acids and derivatives	Amino acids, peptides, and analogues
Glyma.12G073900	M243T798_NEG	-0.515415	0.0285851	RESPONSE REGULATOR OF TWO-COMPONENT SYSTEM // TWO-COMPONENT RESPONSE REGULATOR-LIKE PRR3	beta-Hydroxymyristic acid	Lipids and lipid-like molecules	Fatty Acyls	Fatty acids and conjugates
Glyma.12G073900	M249T727_NEG	-0.615851	0.00650564	RESPONSE REGULATOR OF TWO-COMPONENT SYSTEM // TWO-COMPONENT RESPONSE REGULATOR-LIKE PRR3	Viscic acid	Lipids and lipid-like molecules	Prenol lipids	Sesquiterpenoids
Glyma.12G073900	M252T98_POS	-0.595134	0.00917378	RESPONSE REGULATOR OF TWO-COMPONENT SYSTEM // TWO-COMPONENT RESPONSE REGULATOR-LIKE PRR3	Deoxyadenosine	Nucleosides, nucleotides, and analogues	Purine nucleosides	Purine 2'-deoxyribonucleosides
Glyma.12G073900	M256T737_POS	-0.540638	0.0205281	RESPONSE REGULATOR OF TWO-COMPONENT SYSTEM // TWO-COMPONENT RESPONSE REGULATOR-LIKE PRR3	indolepropanol phosphate
Glyma.12G073900	M269T389_NEG	-0.62682	0.00537159	RESPONSE REGULATOR OF TWO-COMPONENT SYSTEM // TWO-COMPONENT RESPONSE REGULATOR-LIKE PRR3	4',6,7-Trihydroxyisoflavone	Phenylpropanoids and polyketides	Isoflavonoids	Isoflav-2-enes
Glyma.12G073900	M277T796_POS	-0.538043	0.0212635	RESPONSE REGULATOR OF TWO-COMPONENT SYSTEM // TWO-COMPONENT RESPONSE REGULATOR-LIKE PRR3	Dehydrocrepenynic acid	Lipids and lipid-like molecules	Fatty Acyls	Fatty acids and conjugates
Glyma.12G073900	M291T743_POS	-0.594352	0.00928943	RESPONSE REGULATOR OF TWO-COMPONENT SYSTEM // TWO-COMPONENT RESPONSE REGULATOR-LIKE PRR3	Deoxy phytoprostane J1	Lipids and lipid-like molecules	Fatty Acyls	Eicosanoids
Glyma.12G073900	M295T796_POS	-0.524966	0.0252879	RESPONSE REGULATOR OF TWO-COMPONENT SYSTEM // TWO-COMPONENT RESPONSE REGULATOR-LIKE PRR3	Colneleic acid	Lipids and lipid-like molecules	Fatty Acyls	Fatty acids and conjugates
Glyma.12G073900	M303T499_3_POS	0.566152	0.014313	RESPONSE REGULATOR OF TWO-COMPONENT SYSTEM // TWO-COMPONENT RESPONSE REGULATOR-LIKE PRR3	Abietic acid	Lipids and lipid-like molecules	Prenol lipids	Diterpenoids
Glyma.12G073900	M303T840_NEG	0.575316	0.012488	RESPONSE REGULATOR OF TWO-COMPONENT SYSTEM // TWO-COMPONENT RESPONSE REGULATOR-LIKE PRR3	Discadenine	Organic acids and derivatives	Carboxylic acids and derivatives	Amino acids, peptides, and analogues
Glyma.12G073900	M305T814_POS	-0.661525	0.00279041	RESPONSE REGULATOR OF TWO-COMPONENT SYSTEM // TWO-COMPONENT RESPONSE REGULATOR-LIKE PRR3	3-Acetoxy-9-heptadecene-4,6-diyn-8-ol.	Lipids and lipid-like molecules	Fatty Acyls	Fatty alcohol esters
Glyma.12G073900	M309T934_POS	0.671039	0.0022986	RESPONSE REGULATOR OF TWO-COMPONENT SYSTEM // TWO-COMPONENT RESPONSE REGULATOR-LIKE PRR3	(R)-mevalonate diphosphate
Glyma.12G073900	M311T736_NEG	-0.544062	0.019589	RESPONSE REGULATOR OF TWO-COMPONENT SYSTEM // TWO-COMPONENT RESPONSE REGULATOR-LIKE PRR3	13-Hydroperoxyoctadecadienoic acid	Lipids and lipid-like molecules	Fatty Acyls	Lineolic acids and derivatives
Glyma.12G073900	M313T734_NEG	-0.625245	0.0055238	RESPONSE REGULATOR OF TWO-COMPONENT SYSTEM // TWO-COMPONENT RESPONSE REGULATOR-LIKE PRR3	12,13-DHOME	Lipids and lipid-like molecules	Fatty Acyls	Fatty acids and conjugates
Glyma.12G073900	M319T495_2_POS	-0.62182	0.00586674	RESPONSE REGULATOR OF TWO-COMPONENT SYSTEM // TWO-COMPONENT RESPONSE REGULATOR-LIKE PRR3	myricetin
Glyma.12G073900	M321T683_POS	-0.504928	0.0325798	RESPONSE REGULATOR OF TWO-COMPONENT SYSTEM // TWO-COMPONENT RESPONSE REGULATOR-LIKE PRR3	MMV687706	Benzenoids	Benzene and substituted derivatives	Diphenylethers
Glyma.12G073900	M321T870_POS	-0.540685	0.020515	RESPONSE REGULATOR OF TWO-COMPONENT SYSTEM // TWO-COMPONENT RESPONSE REGULATOR-LIKE PRR3	Anomallotusin
Glyma.12G073900	M322T702_NEG	-0.639114	0.00429729	RESPONSE REGULATOR OF TWO-COMPONENT SYSTEM // TWO-COMPONENT RESPONSE REGULATOR-LIKE PRR3	(-)-Jasmonoyl-L-isoleucine	Organic acids and derivatives	Carboxylic acids and derivatives	Amino acids, peptides, and analogues
Glyma.12G073900	M329T783_POS	-0.63876	0.00432556	RESPONSE REGULATOR OF TWO-COMPONENT SYSTEM // TWO-COMPONENT RESPONSE REGULATOR-LIKE PRR3	(4Z,7Z,10Z,13Z,16Z,19Z)-Docosahexaenoic acid	Lipids and lipid-like molecules	Fatty Acyls	Fatty acids and conjugates
Glyma.12G073900	M331T724_POS	-0.708643	0.000994879	RESPONSE REGULATOR OF TWO-COMPONENT SYSTEM // TWO-COMPONENT RESPONSE REGULATOR-LIKE PRR3	(7Z,10Z,13Z,16Z,19Z)-Docosapentaenoic acid	Lipids and lipid-like molecules	Fatty Acyls	Fatty acids and conjugates
Glyma.12G073900	M338T700_POS	-0.542999	0.0198769	RESPONSE REGULATOR OF TWO-COMPONENT SYSTEM // TWO-COMPONENT RESPONSE REGULATOR-LIKE PRR3	5-Hydroxymethyldeoxycytidylate	Nucleosides, nucleotides, and analogues	Pyrimidine nucleotides	Pyrimidine deoxyribonucleotides
Glyma.12G073900	M339T419_POS	0.536379	0.0217455	RESPONSE REGULATOR OF TWO-COMPONENT SYSTEM // TWO-COMPONENT RESPONSE REGULATOR-LIKE PRR3	1-Caffeoyl-4-deoxyquinic acid	Phenylpropanoids and polyketides	Cinnamic acids and derivatives	Hydroxycinnamic acids and derivatives
Glyma.12G073900	M345T861_POS	-0.718936	0.000773623	RESPONSE REGULATOR OF TWO-COMPONENT SYSTEM // TWO-COMPONENT RESPONSE REGULATOR-LIKE PRR3	SB 205607	Organoheterocyclic compounds	Quinolines and derivatives	Phenylquinolines
Glyma.12G073900	M346T860_POS	-0.687394	0.00162055	RESPONSE REGULATOR OF TWO-COMPONENT SYSTEM // TWO-COMPONENT RESPONSE REGULATOR-LIKE PRR3	cyclic pyranopterin phosphate
Glyma.12G073900	M347T786_POS	-0.808482	4.89313e-05	RESPONSE REGULATOR OF TWO-COMPONENT SYSTEM // TWO-COMPONENT RESPONSE REGULATOR-LIKE PRR3	Corticosterone	Lipids and lipid-like molecules	Steroids and steroid derivatives	Hydroxysteroids
Glyma.12G073900	M353T649_1_POS	0.536469	0.0217193	RESPONSE REGULATOR OF TWO-COMPONENT SYSTEM // TWO-COMPONENT RESPONSE REGULATOR-LIKE PRR3	Citrusinol	Phenylpropanoids and polyketides	Flavonoids	Pyranoflavonoids
Glyma.12G073900	M363T922_NEG	-0.583318	0.0110509	RESPONSE REGULATOR OF TWO-COMPONENT SYSTEM // TWO-COMPONENT RESPONSE REGULATOR-LIKE PRR3	XMP
Glyma.12G073900	M365T646_NEG	-0.500128	0.0345461	RESPONSE REGULATOR OF TWO-COMPONENT SYSTEM // TWO-COMPONENT RESPONSE REGULATOR-LIKE PRR3	Ferulenol
Glyma.12G073900	M379T522_NEG	-0.508977	0.0309893	RESPONSE REGULATOR OF TWO-COMPONENT SYSTEM // TWO-COMPONENT RESPONSE REGULATOR-LIKE PRR3	Kinocoumarin	Phenylpropanoids and polyketides	Coumarins and derivatives	Pyranocoumarins
Glyma.12G073900	M391T699_NEG	-0.578127	0.0119672	RESPONSE REGULATOR OF TWO-COMPONENT SYSTEM // TWO-COMPONENT RESPONSE REGULATOR-LIKE PRR3	5-O-Demethylnobiletin
Glyma.12G073900	M613T608_NEG	-0.565356	0.014481	RESPONSE REGULATOR OF TWO-COMPONENT SYSTEM // TWO-COMPONENT RESPONSE REGULATOR-LIKE PRR3	Neomycin B	Organic oxygen compounds	Organooxygen compounds	Carbohydrates and carbohydrate conjugates
Glyma.12G073900	M663T682_POS	0.646213	0.00376158	RESPONSE REGULATOR OF TWO-COMPONENT SYSTEM // TWO-COMPONENT RESPONSE REGULATOR-LIKE PRR3	Prosapogenin	Lipids and lipid-like molecules	Prenol lipids	Terpene glycosides
Glyma.12G073900	M697T613_POS	0.522743	0.0260274	RESPONSE REGULATOR OF TWO-COMPONENT SYSTEM // TWO-COMPONENT RESPONSE REGULATOR-LIKE PRR3	9-{6-[(6,7-dimethoxy-2-methyl-1,2,3,4-tetrahydroisoquinolin-1-yl)methyl]-2,3-dimethoxyphenoxy}-1,2,10-trimethoxy-6-methyl-5,6,6a,7-tetrahydro-4H-dibenzo[de,g]quinoline	Alkaloids and derivatives	Aporphines	NA
Glyma.12G073900	M883T701_NEG	-0.597571	0.00882056	RESPONSE REGULATOR OF TWO-COMPONENT SYSTEM // TWO-COMPONENT RESPONSE REGULATOR-LIKE PRR3	Pennogenin 3-O-beta-chacotrioside	Lipids and lipid-like molecules	Steroids and steroid derivatives	Steroidal glycosides
Glyma.12G073900	M913T695_NEG	-0.634891	0.00464447	RESPONSE REGULATOR OF TWO-COMPONENT SYSTEM // TWO-COMPONENT RESPONSE REGULATOR-LIKE PRR3	Abutiloside H	Lipids and lipid-like molecules	Steroids and steroid derivatives	Steroidal glycosides
Glyma.12G073900	M915T695_NEG	-0.611567	0.00699791	RESPONSE REGULATOR OF TWO-COMPONENT SYSTEM // TWO-COMPONENT RESPONSE REGULATOR-LIKE PRR3	Abutiloside B	Lipids and lipid-like molecules	Steroids and steroid derivatives	Steroidal glycosides
Glyma.12G073900	M949T697_NEG	-0.541388	0.0203197	RESPONSE REGULATOR OF TWO-COMPONENT SYSTEM // TWO-COMPONENT RESPONSE REGULATOR-LIKE PRR3	Zn-Bacteriochlorophyll a
Glyma.12G073900	M974T533_3_POS	-0.578531	0.0118938	RESPONSE REGULATOR OF TWO-COMPONENT SYSTEM // TWO-COMPONENT RESPONSE REGULATOR-LIKE PRR3	Sinapoyl-CoA	Lipids and lipid-like molecules	Fatty Acyls	Fatty acyl thioesters
Glyma.13G135900	M123T63_POS	0.559044	0.0158697	RESPONSE REGULATOR OF TWO-COMPONENT SYSTEM // SUBFAMILY NOT NAMED // TWO-COMPONENT RESPONSE REGULATOR-LIKE PRR3	Polysulfide
Glyma.13G135900	M125T937_POS	0.645681	0.00379967	RESPONSE REGULATOR OF TWO-COMPONENT SYSTEM // SUBFAMILY NOT NAMED // TWO-COMPONENT RESPONSE REGULATOR-LIKE PRR3	3-chloro-L-alanine
Glyma.13G135900	M138T295_POS	-0.674536	0.00213685	RESPONSE REGULATOR OF TWO-COMPONENT SYSTEM // SUBFAMILY NOT NAMED // TWO-COMPONENT RESPONSE REGULATOR-LIKE PRR3	4-Aminobenzoate	Benzenoids	Benzene and substituted derivatives	Benzoic acids and derivatives
Glyma.13G135900	M151T762_POS	-0.62376	0.00567043	RESPONSE REGULATOR OF TWO-COMPONENT SYSTEM // SUBFAMILY NOT NAMED // TWO-COMPONENT RESPONSE REGULATOR-LIKE PRR3	Thymol	Lipids and lipid-like molecules	Prenol lipids	Monoterpenoids
Glyma.13G135900	M158T107_NEG	-0.507631	0.0315112	RESPONSE REGULATOR OF TWO-COMPONENT SYSTEM // SUBFAMILY NOT NAMED // TWO-COMPONENT RESPONSE REGULATOR-LIKE PRR3	5-Acetamidopentanoate	Lipids and lipid-like molecules	Fatty Acyls	Fatty acids and conjugates
Glyma.13G135900	M168T96_POS	-0.549063	0.0182784	RESPONSE REGULATOR OF TWO-COMPONENT SYSTEM // SUBFAMILY NOT NAMED // TWO-COMPONENT RESPONSE REGULATOR-LIKE PRR3	Pyridoxal hydrochrolide	Organoheterocyclic compounds	Pyridines and derivatives	Pyridine carboxaldehydes
Glyma.13G135900	M169T761_POS	-0.71574	0.000837417	RESPONSE REGULATOR OF TWO-COMPONENT SYSTEM // SUBFAMILY NOT NAMED // TWO-COMPONENT RESPONSE REGULATOR-LIKE PRR3	6-Hydroxy-2,6-dimethyl-2,7-octadien-4-one	Lipids and lipid-like molecules	Prenol lipids	Monoterpenoids
Glyma.13G135900	M171T390_NEG	-0.504563	0.0327264	RESPONSE REGULATOR OF TWO-COMPONENT SYSTEM // SUBFAMILY NOT NAMED // TWO-COMPONENT RESPONSE REGULATOR-LIKE PRR3	1,4-Cyclohexanedicarboxylic acid	Organic acids and derivatives	Carboxylic acids and derivatives	Dicarboxylic acids and derivatives
Glyma.13G135900	M172T390_NEG	-0.510988	0.0302223	RESPONSE REGULATOR OF TWO-COMPONENT SYSTEM // SUBFAMILY NOT NAMED // TWO-COMPONENT RESPONSE REGULATOR-LIKE PRR3	5-Guanidino-2-oxopentanoate	Organic acids and derivatives	Keto acids and derivatives	Short-chain keto acids and derivatives
Glyma.13G135900	M185T66_POS	-0.559512	0.0157631	RESPONSE REGULATOR OF TWO-COMPONENT SYSTEM // SUBFAMILY NOT NAMED // TWO-COMPONENT RESPONSE REGULATOR-LIKE PRR3	5-Hydroxyisourate	Organoheterocyclic compounds	Imidazopyrimidines	Purines and purine derivatives
Glyma.13G135900	M186T66_POS	-0.570779	0.0133669	RESPONSE REGULATOR OF TWO-COMPONENT SYSTEM // SUBFAMILY NOT NAMED // TWO-COMPONENT RESPONSE REGULATOR-LIKE PRR3	2-Amino-3-carboxymuconate semialdehyde	Organic acids and derivatives	Carboxylic acids and derivatives	Amino acids, peptides, and analogues
Glyma.13G135900	M187T69_POS	-0.65965	0.00289692	RESPONSE REGULATOR OF TWO-COMPONENT SYSTEM // SUBFAMILY NOT NAMED // TWO-COMPONENT RESPONSE REGULATOR-LIKE PRR3	3-maleylpyruvate
Glyma.13G135900	M191T595_POS	-0.752869	0.000311058	RESPONSE REGULATOR OF TWO-COMPONENT SYSTEM // SUBFAMILY NOT NAMED // TWO-COMPONENT RESPONSE REGULATOR-LIKE PRR3	beta-Damascenone	Organic oxygen compounds	Organooxygen compounds	Carbonyl compounds
Glyma.13G135900	M193T806_POS	-0.652237	0.00335095	RESPONSE REGULATOR OF TWO-COMPONENT SYSTEM // SUBFAMILY NOT NAMED // TWO-COMPONENT RESPONSE REGULATOR-LIKE PRR3	Vitispirane	Organoheterocyclic compounds	Tetrahydrofurans
Glyma.13G135900	M199T446_POS	-0.700587	0.00120277	RESPONSE REGULATOR OF TWO-COMPONENT SYSTEM // SUBFAMILY NOT NAMED // TWO-COMPONENT RESPONSE REGULATOR-LIKE PRR3	Hercynine	Organic acids and derivatives	Carboxylic acids and derivatives	Amino acids, peptides, and analogues
Glyma.13G135900	M201T74_POS	-0.685989	0.00167135	RESPONSE REGULATOR OF TWO-COMPONENT SYSTEM // SUBFAMILY NOT NAMED // TWO-COMPONENT RESPONSE REGULATOR-LIKE PRR3	D-erythrose 4-phosphate
Glyma.13G135900	M207T711_POS	-0.696311	0.00132699	RESPONSE REGULATOR OF TWO-COMPONENT SYSTEM // SUBFAMILY NOT NAMED // TWO-COMPONENT RESPONSE REGULATOR-LIKE PRR3	Etrogol	Benzenoids	Phenols	Tyrosols and derivatives
Glyma.13G135900	M209T604_POS	-0.68456	0.00172436	RESPONSE REGULATOR OF TWO-COMPONENT SYSTEM // SUBFAMILY NOT NAMED // TWO-COMPONENT RESPONSE REGULATOR-LIKE PRR3	alpha-Asarone	Benzenoids	Phenol ethers	Anisoles
Glyma.13G135900	M211T567_POS	-0.527185	0.0245663	RESPONSE REGULATOR OF TWO-COMPONENT SYSTEM // SUBFAMILY NOT NAMED // TWO-COMPONENT RESPONSE REGULATOR-LIKE PRR3	(+)-7-Isojasmonic acid	Lipids and lipid-like molecules	Fatty Acyls	Lineolic acids and derivatives
Glyma.13G135900	M217T97_POS	-0.546718	0.0188839	RESPONSE REGULATOR OF TWO-COMPONENT SYSTEM // SUBFAMILY NOT NAMED // TWO-COMPONENT RESPONSE REGULATOR-LIKE PRR3	gamma-Glutamyl-gamma-aminobutyraldehyde	Organic acids and derivatives	Carboxylic acids and derivatives	Amino acids, peptides, and analogues
Glyma.13G135900	M223T710_NEG	-0.535152	0.0221065	RESPONSE REGULATOR OF TWO-COMPONENT SYSTEM // SUBFAMILY NOT NAMED // TWO-COMPONENT RESPONSE REGULATOR-LIKE PRR3	(+)-7-Isomethyljasmonate	Lipids and lipid-like molecules	Fatty Acyls	Lineolic acids and derivatives
Glyma.13G135900	M232T70_NEG	-0.500222	0.0345067	RESPONSE REGULATOR OF TWO-COMPONENT SYSTEM // SUBFAMILY NOT NAMED // TWO-COMPONENT RESPONSE REGULATOR-LIKE PRR3	2,3-Dihydro-3-hydroxy-3-methylthiazolo[3,2-a]indole-9-carboxaldehyde	Organoheterocyclic compounds	Indoles and derivatives	Indoles
Glyma.13G135900	M235T732_POS	-0.547201	0.018758	RESPONSE REGULATOR OF TWO-COMPONENT SYSTEM // SUBFAMILY NOT NAMED // TWO-COMPONENT RESPONSE REGULATOR-LIKE PRR3	Germacrene A acid	Lipids and lipid-like molecules	Prenol lipids	Sesquiterpenoids
Glyma.13G135900	M237T724_POS	-0.633158	0.00479342	RESPONSE REGULATOR OF TWO-COMPONENT SYSTEM // SUBFAMILY NOT NAMED // TWO-COMPONENT RESPONSE REGULATOR-LIKE PRR3	Aubergenone	Lipids and lipid-like molecules	Prenol lipids	Sesquiterpenoids
Glyma.13G135900	M238T70_POS	-0.533873	0.0224878	RESPONSE REGULATOR OF TWO-COMPONENT SYSTEM // SUBFAMILY NOT NAMED // TWO-COMPONENT RESPONSE REGULATOR-LIKE PRR3	S-succinylcysteine	Organic acids and derivatives	Carboxylic acids and derivatives	Amino acids, peptides, and analogues
Glyma.13G135900	M245T359_POS	-0.514074	0.0290734	RESPONSE REGULATOR OF TWO-COMPONENT SYSTEM // SUBFAMILY NOT NAMED // TWO-COMPONENT RESPONSE REGULATOR-LIKE PRR3	(-)-Falcarinol	Lipids and lipid-like molecules	Fatty Acyls	Fatty alcohols
Glyma.13G135900	M252T98_POS	-0.67731	0.00201532	RESPONSE REGULATOR OF TWO-COMPONENT SYSTEM // SUBFAMILY NOT NAMED // TWO-COMPONENT RESPONSE REGULATOR-LIKE PRR3	Deoxyadenosine	Nucleosides, nucleotides, and analogues	Purine nucleosides	Purine 2'-deoxyribonucleosides
Glyma.13G135900	M258T660_POS	-0.691851	0.00146775	RESPONSE REGULATOR OF TWO-COMPONENT SYSTEM // SUBFAMILY NOT NAMED // TWO-COMPONENT RESPONSE REGULATOR-LIKE PRR3	Norcraugsodine	Benzenoids	Phenols	Benzenediols
Glyma.13G135900	M269T389_NEG	-0.541458	0.0203001	RESPONSE REGULATOR OF TWO-COMPONENT SYSTEM // SUBFAMILY NOT NAMED // TWO-COMPONENT RESPONSE REGULATOR-LIKE PRR3	4',6,7-Trihydroxyisoflavone	Phenylpropanoids and polyketides	Isoflavonoids	Isoflav-2-enes
Glyma.13G135900	M269T661_POS	-0.575719	0.0124123	RESPONSE REGULATOR OF TWO-COMPONENT SYSTEM // SUBFAMILY NOT NAMED // TWO-COMPONENT RESPONSE REGULATOR-LIKE PRR3	1-Hydroxytorilolone	Lipids and lipid-like molecules	Prenol lipids	Sesquiterpenoids
Glyma.13G135900	M273T639_POS	-0.565364	0.0144793	RESPONSE REGULATOR OF TWO-COMPONENT SYSTEM // SUBFAMILY NOT NAMED // TWO-COMPONENT RESPONSE REGULATOR-LIKE PRR3	Naringenin chalcone	Phenylpropanoids and polyketides	Linear 1,3-diarylpropanoids	Chalcones and dihydrochalcones
Glyma.13G135900	M277T796_POS	-0.640213	0.00421049	RESPONSE REGULATOR OF TWO-COMPONENT SYSTEM // SUBFAMILY NOT NAMED // TWO-COMPONENT RESPONSE REGULATOR-LIKE PRR3	Dehydrocrepenynic acid	Lipids and lipid-like molecules	Fatty Acyls	Fatty acids and conjugates
Glyma.13G135900	M279T781_POS	-0.567295	0.0140746	RESPONSE REGULATOR OF TWO-COMPONENT SYSTEM // SUBFAMILY NOT NAMED // TWO-COMPONENT RESPONSE REGULATOR-LIKE PRR3	?-linolenic acid	Lipids and lipid-like molecules	Fatty Acyls	Lineolic acids and derivatives
Glyma.13G135900	M287T811_POS	-0.558895	0.0159036	RESPONSE REGULATOR OF TWO-COMPONENT SYSTEM // SUBFAMILY NOT NAMED // TWO-COMPONENT RESPONSE REGULATOR-LIKE PRR3	Retinol	Lipids and lipid-like molecules	Prenol lipids	Retinoids
Glyma.13G135900	M288T742_POS	-0.563825	0.0148086	RESPONSE REGULATOR OF TWO-COMPONENT SYSTEM // SUBFAMILY NOT NAMED // TWO-COMPONENT RESPONSE REGULATOR-LIKE PRR3	Lauryl diethanolamide	Lipids and lipid-like molecules	Fatty Acyls	Fatty amides
Glyma.13G135900	M291T743_POS	-0.663558	0.00267867	RESPONSE REGULATOR OF TWO-COMPONENT SYSTEM // SUBFAMILY NOT NAMED // TWO-COMPONENT RESPONSE REGULATOR-LIKE PRR3	Deoxy phytoprostane J1	Lipids and lipid-like molecules	Fatty Acyls	Eicosanoids
Glyma.13G135900	M295T796_POS	-0.615304	0.00656682	RESPONSE REGULATOR OF TWO-COMPONENT SYSTEM // SUBFAMILY NOT NAMED // TWO-COMPONENT RESPONSE REGULATOR-LIKE PRR3	Colneleic acid	Lipids and lipid-like molecules	Fatty Acyls	Fatty acids and conjugates
Glyma.13G135900	M298T830_POS	-0.511384	0.0300727	RESPONSE REGULATOR OF TWO-COMPONENT SYSTEM // SUBFAMILY NOT NAMED // TWO-COMPONENT RESPONSE REGULATOR-LIKE PRR3	N7-methylguanosine
Glyma.13G135900	M302T722_POS	-0.508921	0.0310109	RESPONSE REGULATOR OF TWO-COMPONENT SYSTEM // SUBFAMILY NOT NAMED // TWO-COMPONENT RESPONSE REGULATOR-LIKE PRR3	CIF 3
Glyma.13G135900	M303T888_POS	-0.519569	0.0271123	RESPONSE REGULATOR OF TWO-COMPONENT SYSTEM // SUBFAMILY NOT NAMED // TWO-COMPONENT RESPONSE REGULATOR-LIKE PRR3	(3R,4R)-3-(6-hydroxy-1,3-benzodioxol-5-yl)-3,4-dihydro-2H-chromene-4,7-diol
Glyma.13G135900	M305T814_POS	-0.760241	0.000250421	RESPONSE REGULATOR OF TWO-COMPONENT SYSTEM // SUBFAMILY NOT NAMED // TWO-COMPONENT RESPONSE REGULATOR-LIKE PRR3	3-Acetoxy-9-heptadecene-4,6-diyn-8-ol.	Lipids and lipid-like molecules	Fatty Acyls	Fatty alcohol esters
Glyma.13G135900	M306T151_POS	-0.504938	0.0325759	RESPONSE REGULATOR OF TWO-COMPONENT SYSTEM // SUBFAMILY NOT NAMED // TWO-COMPONENT RESPONSE REGULATOR-LIKE PRR3	6'-Oxolividamine	Organic oxygen compounds	Organooxygen compounds	Carbohydrates and carbohydrate conjugates
Glyma.13G135900	M309T934_POS	0.568589	0.0138084	RESPONSE REGULATOR OF TWO-COMPONENT SYSTEM // SUBFAMILY NOT NAMED // TWO-COMPONENT RESPONSE REGULATOR-LIKE PRR3	(R)-mevalonate diphosphate
Glyma.13G135900	M311T736_NEG	-0.523921	0.0256335	RESPONSE REGULATOR OF TWO-COMPONENT SYSTEM // SUBFAMILY NOT NAMED // TWO-COMPONENT RESPONSE REGULATOR-LIKE PRR3	13-Hydroperoxyoctadecadienoic acid	Lipids and lipid-like molecules	Fatty Acyls	Lineolic acids and derivatives
Glyma.13G135900	M313T734_NEG	-0.601994	0.00820755	RESPONSE REGULATOR OF TWO-COMPONENT SYSTEM // SUBFAMILY NOT NAMED // TWO-COMPONENT RESPONSE REGULATOR-LIKE PRR3	12,13-DHOME	Lipids and lipid-like molecules	Fatty Acyls	Fatty acids and conjugates
Glyma.13G135900	M319T495_2_POS	-0.622215	0.00582635	RESPONSE REGULATOR OF TWO-COMPONENT SYSTEM // SUBFAMILY NOT NAMED // TWO-COMPONENT RESPONSE REGULATOR-LIKE PRR3	myricetin
Glyma.13G135900	M321T683_POS	-0.617844	0.00628634	RESPONSE REGULATOR OF TWO-COMPONENT SYSTEM // SUBFAMILY NOT NAMED // TWO-COMPONENT RESPONSE REGULATOR-LIKE PRR3	MMV687706	Benzenoids	Benzene and substituted derivatives	Diphenylethers
Glyma.13G135900	M321T870_POS	-0.598464	0.00869385	RESPONSE REGULATOR OF TWO-COMPONENT SYSTEM // SUBFAMILY NOT NAMED // TWO-COMPONENT RESPONSE REGULATOR-LIKE PRR3	Anomallotusin
Glyma.13G135900	M322T702_NEG	-0.554573	0.0169154	RESPONSE REGULATOR OF TWO-COMPONENT SYSTEM // SUBFAMILY NOT NAMED // TWO-COMPONENT RESPONSE REGULATOR-LIKE PRR3	(-)-Jasmonoyl-L-isoleucine	Organic acids and derivatives	Carboxylic acids and derivatives	Amino acids, peptides, and analogues
Glyma.13G135900	M329T653_POS	-0.581746	0.0113222	RESPONSE REGULATOR OF TWO-COMPONENT SYSTEM // SUBFAMILY NOT NAMED // TWO-COMPONENT RESPONSE REGULATOR-LIKE PRR3	2,3-Dinor-8-iso prostaglandin F1alpha	Lipids and lipid-like molecules	Fatty Acyls	Eicosanoids
Glyma.13G135900	M329T783_POS	-0.697845	0.00128126	RESPONSE REGULATOR OF TWO-COMPONENT SYSTEM // SUBFAMILY NOT NAMED // TWO-COMPONENT RESPONSE REGULATOR-LIKE PRR3	(4Z,7Z,10Z,13Z,16Z,19Z)-Docosahexaenoic acid	Lipids and lipid-like molecules	Fatty Acyls	Fatty acids and conjugates
Glyma.13G135900	M331T724_POS	-0.738154	0.000469486	RESPONSE REGULATOR OF TWO-COMPONENT SYSTEM // SUBFAMILY NOT NAMED // TWO-COMPONENT RESPONSE REGULATOR-LIKE PRR3	(7Z,10Z,13Z,16Z,19Z)-Docosapentaenoic acid	Lipids and lipid-like molecules	Fatty Acyls	Fatty acids and conjugates
Glyma.13G135900	M336T913_POS	-0.505674	0.0322821	RESPONSE REGULATOR OF TWO-COMPONENT SYSTEM // SUBFAMILY NOT NAMED // TWO-COMPONENT RESPONSE REGULATOR-LIKE PRR3	N4-(beta-N-acetyl-D-glucosaminyl)-L-asparagine
Glyma.13G135900	M338T700_POS	-0.729244	0.000594821	RESPONSE REGULATOR OF TWO-COMPONENT SYSTEM // SUBFAMILY NOT NAMED // TWO-COMPONENT RESPONSE REGULATOR-LIKE PRR3	5-Hydroxymethyldeoxycytidylate	Nucleosides, nucleotides, and analogues	Pyrimidine nucleotides	Pyrimidine deoxyribonucleotides
Glyma.13G135900	M345T861_POS	-0.705221	0.00107918	RESPONSE REGULATOR OF TWO-COMPONENT SYSTEM // SUBFAMILY NOT NAMED // TWO-COMPONENT RESPONSE REGULATOR-LIKE PRR3	SB 205607	Organoheterocyclic compounds	Quinolines and derivatives	Phenylquinolines
Glyma.13G135900	M346T860_POS	-0.576441	0.0122774	RESPONSE REGULATOR OF TWO-COMPONENT SYSTEM // SUBFAMILY NOT NAMED // TWO-COMPONENT RESPONSE REGULATOR-LIKE PRR3	cyclic pyranopterin phosphate
Glyma.13G135900	M347T786_POS	-0.91158	1.4192e-07	RESPONSE REGULATOR OF TWO-COMPONENT SYSTEM // SUBFAMILY NOT NAMED // TWO-COMPONENT RESPONSE REGULATOR-LIKE PRR3	Corticosterone	Lipids and lipid-like molecules	Steroids and steroid derivatives	Hydroxysteroids
Glyma.13G135900	M350T742_POS	-0.581451	0.0113737	RESPONSE REGULATOR OF TWO-COMPONENT SYSTEM // SUBFAMILY NOT NAMED // TWO-COMPONENT RESPONSE REGULATOR-LIKE PRR3	1-(2-carboxyphenylamino)-1-deoxy-D-ribulose 5-phosphate
Glyma.13G135900	M363T910_POS	-0.505414	0.0323857	RESPONSE REGULATOR OF TWO-COMPONENT SYSTEM // SUBFAMILY NOT NAMED // TWO-COMPONENT RESPONSE REGULATOR-LIKE PRR3	3,6,9,12-Tetraoxatetracosan-1-ol	Organic oxygen compounds	Organooxygen compounds	Ethers
Glyma.13G135900	M363T922_NEG	-0.734065	0.000523938	RESPONSE REGULATOR OF TWO-COMPONENT SYSTEM // SUBFAMILY NOT NAMED // TWO-COMPONENT RESPONSE REGULATOR-LIKE PRR3	XMP
Glyma.13G135900	M374T406_POS	-0.543443	0.0197562	RESPONSE REGULATOR OF TWO-COMPONENT SYSTEM // SUBFAMILY NOT NAMED // TWO-COMPONENT RESPONSE REGULATOR-LIKE PRR3	N-acetyl-D-muramate 6-phosphate
Glyma.13G135900	M391T699_NEG	-0.670582	0.00232046	RESPONSE REGULATOR OF TWO-COMPONENT SYSTEM // SUBFAMILY NOT NAMED // TWO-COMPONENT RESPONSE REGULATOR-LIKE PRR3	5-O-Demethylnobiletin
Glyma.13G135900	M427T460_POS	-0.518546	0.0274695	RESPONSE REGULATOR OF TWO-COMPONENT SYSTEM // SUBFAMILY NOT NAMED // TWO-COMPONENT RESPONSE REGULATOR-LIKE PRR3	dZDP
Glyma.13G135900	M430T906_POS	-0.500517	0.0343835	RESPONSE REGULATOR OF TWO-COMPONENT SYSTEM // SUBFAMILY NOT NAMED // TWO-COMPONENT RESPONSE REGULATOR-LIKE PRR3	15alpha-Hydroxysolasodine	Lipids and lipid-like molecules	Steroids and steroid derivatives	Steroidal alkaloids
Glyma.13G135900	M433T374_POS	-0.521622	0.0264069	RESPONSE REGULATOR OF TWO-COMPONENT SYSTEM // SUBFAMILY NOT NAMED // TWO-COMPONENT RESPONSE REGULATOR-LIKE PRR3	Apigenin-7-O-glucoside	Phenylpropanoids and polyketides	Flavonoids	Flavonoid glycosides
Glyma.13G135900	M457T870_POS	-0.535978	0.0218629	RESPONSE REGULATOR OF TWO-COMPONENT SYSTEM // SUBFAMILY NOT NAMED // TWO-COMPONENT RESPONSE REGULATOR-LIKE PRR3	Oleanolic acid	Lipids and lipid-like molecules	Prenol lipids	Triterpenoids
Glyma.13G135900	M471T243_NEG	-0.521672	0.0263897	RESPONSE REGULATOR OF TWO-COMPONENT SYSTEM // SUBFAMILY NOT NAMED // TWO-COMPONENT RESPONSE REGULATOR-LIKE PRR3	Hassmarin	Phenylpropanoids and polyketides	Coumarins and derivatives	Pyranocoumarins
Glyma.13G135900	M600T447_2_POS	-0.546683	0.0188932	RESPONSE REGULATOR OF TWO-COMPONENT SYSTEM // SUBFAMILY NOT NAMED // TWO-COMPONENT RESPONSE REGULATOR-LIKE PRR3	5'''-epi-Lividomycin B	Organic oxygen compounds	Organooxygen compounds	Carbohydrates and carbohydrate conjugates
Glyma.13G135900	M613T608_NEG	-0.593146	0.00947027	RESPONSE REGULATOR OF TWO-COMPONENT SYSTEM // SUBFAMILY NOT NAMED // TWO-COMPONENT RESPONSE REGULATOR-LIKE PRR3	Neomycin B	Organic oxygen compounds	Organooxygen compounds	Carbohydrates and carbohydrate conjugates
Glyma.13G135900	M640T413_POS	-0.598562	0.00868005	RESPONSE REGULATOR OF TWO-COMPONENT SYSTEM // SUBFAMILY NOT NAMED // TWO-COMPONENT RESPONSE REGULATOR-LIKE PRR3	Demethyl-desacetyl-rifamycin S	Phenylpropanoids and polyketides	Macrolactams	NA
Glyma.13G135900	M663T682_POS	0.577988	0.0119925	RESPONSE REGULATOR OF TWO-COMPONENT SYSTEM // SUBFAMILY NOT NAMED // TWO-COMPONENT RESPONSE REGULATOR-LIKE PRR3	Prosapogenin	Lipids and lipid-like molecules	Prenol lipids	Terpene glycosides
Glyma.13G135900	M883T701_NEG	-0.547567	0.0186628	RESPONSE REGULATOR OF TWO-COMPONENT SYSTEM // SUBFAMILY NOT NAMED // TWO-COMPONENT RESPONSE REGULATOR-LIKE PRR3	Pennogenin 3-O-beta-chacotrioside	Lipids and lipid-like molecules	Steroids and steroid derivatives	Steroidal glycosides
Glyma.13G135900	M911T711_POS	-0.533398	0.0226308	RESPONSE REGULATOR OF TWO-COMPONENT SYSTEM // SUBFAMILY NOT NAMED // TWO-COMPONENT RESPONSE REGULATOR-LIKE PRR3	Soyasaponin Bg	Lipids and lipid-like molecules	Prenol lipids	Terpene glycosides
Glyma.13G135900	M913T695_NEG	-0.557078	0.0163229	RESPONSE REGULATOR OF TWO-COMPONENT SYSTEM // SUBFAMILY NOT NAMED // TWO-COMPONENT RESPONSE REGULATOR-LIKE PRR3	Abutiloside H	Lipids and lipid-like molecules	Steroids and steroid derivatives	Steroidal glycosides
Glyma.13G135900	M915T695_NEG	-0.575044	0.0125395	RESPONSE REGULATOR OF TWO-COMPONENT SYSTEM // SUBFAMILY NOT NAMED // TWO-COMPONENT RESPONSE REGULATOR-LIKE PRR3	Abutiloside B	Lipids and lipid-like molecules	Steroids and steroid derivatives	Steroidal glycosides
Glyma.13G135900	M974T533_3_POS	-0.66028	0.00286075	RESPONSE REGULATOR OF TWO-COMPONENT SYSTEM // SUBFAMILY NOT NAMED // TWO-COMPONENT RESPONSE REGULATOR-LIKE PRR3	Sinapoyl-CoA	Lipids and lipid-like molecules	Fatty Acyls	Fatty acyl thioesters
Glyma.01G091400	M101T74_NEG	-0.525745	0.0250326	Naringenin-chalcone synthase / Flavonone synthase	2-Oxobutanoate	Organic acids and derivatives	Keto acids and derivatives	Short-chain keto acids and derivatives
Glyma.01G091400	M101T95_NEG	-0.500845	0.0342465	Naringenin-chalcone synthase / Flavonone synthase	2-Ketobutyric acid	Organic acids and derivatives	Keto acids and derivatives	Short-chain keto acids and derivatives
Glyma.01G091400	M102T71_POS	0.885699	1.01758e-06	Naringenin-chalcone synthase / Flavonone synthase	1-Aminocyclopropane-1-carboxylate	Organic acids and derivatives	Carboxylic acids and derivatives	Amino acids, peptides, and analogues
Glyma.01G091400	M104T65_NEG	0.862773	4.07411e-06	Naringenin-chalcone synthase / Flavonone synthase	Serine	Organic acids and derivatives	Carboxylic acids and derivatives	Amino acids, peptides, and analogues
Glyma.01G091400	M106T70_POS	0.876848	1.79525e-06	Naringenin-chalcone synthase / Flavonone synthase	L-Serine	Organic acids and derivatives	Carboxylic acids and derivatives	Amino acids, peptides, and analogues
Glyma.01G091400	M113T68_NEG	0.516844	0.0280717	Naringenin-chalcone synthase / Flavonone synthase	2-Hydroxy-2,4-pentadienoate	Lipids and lipid-like molecules	Fatty Acyls	Fatty acids and conjugates
Glyma.01G091400	M115T75_NEG	-0.741179	0.000432338	Naringenin-chalcone synthase / Flavonone synthase	Maleic acid	Organic acids and derivatives	Carboxylic acids and derivatives	Dicarboxylic acids and derivatives
Glyma.01G091400	M118T66_NEG	0.608511	0.00736726	Naringenin-chalcone synthase / Flavonone synthase	L-Allothreonine	Organic acids and derivatives	Carboxylic acids and derivatives	Amino acids, peptides, and analogues
Glyma.01G091400	M118T73_POS	0.746144	0.000376715	Naringenin-chalcone synthase / Flavonone synthase	VALINE	Organic acids and derivatives	Carboxylic acids and derivatives	Amino acids, peptides, and analogues
Glyma.01G091400	M119T67_NEG	-0.651076	0.0034271	Naringenin-chalcone synthase / Flavonone synthase	3,4-Dihydroxybutanoic acid	Organic acids and derivatives	Hydroxy acids and derivatives	Beta hydroxy acids and derivatives
Glyma.01G091400	M120T69_POS	0.662872	0.00271598	Naringenin-chalcone synthase / Flavonone synthase	Threonine	Organic acids and derivatives	Carboxylic acids and derivatives	Amino acids, peptides, and analogues
Glyma.01G091400	M125T71_POS	0.593156	0.00946865	Naringenin-chalcone synthase / Flavonone synthase	Methylimidazole acetaldehyde	Organoheterocyclic compounds	Azoles	Imidazoles
Glyma.01G091400	M130T68_POS	0.79189	8.99168e-05	Naringenin-chalcone synthase / Flavonone synthase	5-Oxoproline	Organic acids and derivatives	Carboxylic acids and derivatives	Amino acids, peptides, and analogues
Glyma.01G091400	M132T98_2_POS	0.532312	0.02296	Naringenin-chalcone synthase / Flavonone synthase	L-Isoleucine	Organic acids and derivatives	Carboxylic acids and derivatives	Amino acids, peptides, and analogues
Glyma.01G091400	M135T258_NEG	-0.53074	0.0234435	Naringenin-chalcone synthase / Flavonone synthase	p-Hydroxyacetophenone	Organic oxygen compounds	Organooxygen compounds	Carbonyl compounds
Glyma.01G091400	M136T433_NEG	0.580391	0.0115605	Naringenin-chalcone synthase / Flavonone synthase	Anthranilic acid	Benzenoids	Benzene and substituted derivatives	Benzoic acids and derivatives
Glyma.01G091400	M142T67_POS	0.741624	0.000427081	Naringenin-chalcone synthase / Flavonone synthase	carbamoyl phosphate
Glyma.01G091400	M145T95_NEG	-0.539196	0.0209341	Naringenin-chalcone synthase / Flavonone synthase	alpha-Ketoglutaric acid	Organic acids and derivatives	Keto acids and derivatives	Gamma-keto acids and derivatives
Glyma.01G091400	M147T69_POS	0.860118	4.70764e-06	Naringenin-chalcone synthase / Flavonone synthase	L-Glutamine	Organic acids and derivatives	Carboxylic acids and derivatives	Amino acids, peptides, and analogues
Glyma.01G091400	M150T929_NEG	0.598575	0.00867832	Naringenin-chalcone synthase / Flavonone synthase	2-Benzothiazolinone	Organoheterocyclic compounds	Benzothiazoles
Glyma.01G091400	M154T63_NEG	0.58387	0.0109569	Naringenin-chalcone synthase / Flavonone synthase	Histidine	Organic acids and derivatives	Carboxylic acids and derivatives	Amino acids, peptides, and analogues
Glyma.01G091400	M155T63_NEG	0.574993	0.012549	Naringenin-chalcone synthase / Flavonone synthase	Indole-3-acetonitrile	Organoheterocyclic compounds	Indoles and derivatives	Indoles
Glyma.01G091400	M157T70_NEG	0.588889	0.0101309	Naringenin-chalcone synthase / Flavonone synthase	(R)(-)-Allantoin	Organoheterocyclic compounds	Azolidines	Imidazolidines
Glyma.01G091400	M158T107_NEG	0.772591	0.000171142	Naringenin-chalcone synthase / Flavonone synthase	5-Acetamidopentanoate	Lipids and lipid-like molecules	Fatty Acyls	Fatty acids and conjugates
Glyma.01G091400	M161T69_POS	0.629632	0.00510843	Naringenin-chalcone synthase / Flavonone synthase	N(alpha)-Acetyl-L-2,4-diaminobutyrate	Organic acids and derivatives	Carboxylic acids and derivatives	Amino acids, peptides, and analogues
Glyma.01G091400	M169T217_NEG	-0.523007	0.0259388	Naringenin-chalcone synthase / Flavonone synthase	3,4-Dihydroxyphenylethyleneglycol	Benzenoids	Phenols	Benzenediols
Glyma.01G091400	M172T298_POS	0.714292	0.00086773	Naringenin-chalcone synthase / Flavonone synthase	N-Butanoylhomoserine lactone	Organic acids and derivatives	Carboxylic acids and derivatives	Amino acids, peptides, and analogues
Glyma.01G091400	M173T421_NEG	0.684933	0.00171038	Naringenin-chalcone synthase / Flavonone synthase	Suberic acid	Lipids and lipid-like molecules	Fatty Acyls	Fatty acids and conjugates
Glyma.01G091400	M177T695_POS	0.548723	0.0183651	Naringenin-chalcone synthase / Flavonone synthase	4-deoxy-L-threo-hex-4-enopyranuronate
Glyma.01G091400	M181T65_NEG	-0.504035	0.032939	Naringenin-chalcone synthase / Flavonone synthase	D-Mannitol	Organic oxygen compounds	Organooxygen compounds	Carbohydrates and carbohydrate conjugates
Glyma.01G091400	M182T152_POS	0.576116	0.012338	Naringenin-chalcone synthase / Flavonone synthase	L-Phosphinothricin	Organic acids and derivatives	Carboxylic acids and derivatives	Amino acids, peptides, and analogues
Glyma.01G091400	M184T463_POS	0.502259	0.0336621	Naringenin-chalcone synthase / Flavonone synthase	Acetylpseudotropine	Alkaloids and derivatives	Tropane alkaloids	NA
Glyma.01G091400	M185T66_POS	0.825802	2.42961e-05	Naringenin-chalcone synthase / Flavonone synthase	5-Hydroxyisourate	Organoheterocyclic compounds	Imidazopyrimidines	Purines and purine derivatives
Glyma.01G091400	M186T66_POS	0.801339	6.402e-05	Naringenin-chalcone synthase / Flavonone synthase	2-Amino-3-carboxymuconate semialdehyde	Organic acids and derivatives	Carboxylic acids and derivatives	Amino acids, peptides, and analogues
Glyma.01G091400	M187T69_POS	0.727332	0.000625083	Naringenin-chalcone synthase / Flavonone synthase	3-maleylpyruvate
Glyma.01G091400	M188T76_NEG	0.504381	0.0327994	Naringenin-chalcone synthase / Flavonone synthase	N-Acetylglutamic acid	Organic acids and derivatives	Carboxylic acids and derivatives	Amino acids, peptides, and analogues
Glyma.01G091400	M189T63_POS	0.52114	0.0265712	Naringenin-chalcone synthase / Flavonone synthase	NE,NE,NE-TRIMETHYLLYSINE	Organic acids and derivatives	Carboxylic acids and derivatives	Amino acids, peptides, and analogues
Glyma.01G091400	M201T74_POS	0.781678	0.000127404	Naringenin-chalcone synthase / Flavonone synthase	D-erythrose 4-phosphate
Glyma.01G091400	M209T98_POS	0.549714	0.0181129	Naringenin-chalcone synthase / Flavonone synthase	L-Kynurenine	Organic oxygen compounds	Organooxygen compounds	Carbonyl compounds
Glyma.01G091400	M215T194_POS	0.553311	0.0172201	Naringenin-chalcone synthase / Flavonone synthase	Dethiobiotin	Lipids and lipid-like molecules	Fatty Acyls	Fatty acids and conjugates
Glyma.01G091400	M215T67_NEG	-0.522499	0.0261098	Naringenin-chalcone synthase / Flavonone synthase	2-C-Methyl-D-erythritol 4-phosphate	Organic acids and derivatives	Organic phosphoric acids and derivatives	Phosphate esters
Glyma.01G091400	M216T376_NEG	0.660707	0.00283649	Naringenin-chalcone synthase / Flavonone synthase	N-Acetyl-L-citrulline	Organic acids and derivatives	Carboxylic acids and derivatives	Amino acids, peptides, and analogues
Glyma.01G091400	M220T74_POS	-0.531856	0.0230996	Naringenin-chalcone synthase / Flavonone synthase	O-Succinyl-L-homoserine	Organic acids and derivatives	Carboxylic acids and derivatives	Amino acids, peptides, and analogues
Glyma.01G091400	M237T724_POS	0.657527	0.00302141	Naringenin-chalcone synthase / Flavonone synthase	Aubergenone	Lipids and lipid-like molecules	Prenol lipids	Sesquiterpenoids
Glyma.01G091400	M238T70_POS	0.529575	0.0238068	Naringenin-chalcone synthase / Flavonone synthase	S-succinylcysteine	Organic acids and derivatives	Carboxylic acids and derivatives	Amino acids, peptides, and analogues
Glyma.01G091400	M259T126_POS	0.587498	0.0103546	Naringenin-chalcone synthase / Flavonone synthase	(1-Ribosylimidazole)-4-acetate	Nucleosides, nucleotides, and analogues	Imidazole ribonucleosides and ribonucleotides	NA
Glyma.01G091400	M260T237_NEG	-0.562763	0.0150392	Naringenin-chalcone synthase / Flavonone synthase	(-)-N-(N-Acetylaminomethyl)cytisine	Alkaloids and derivatives	Lupin alkaloids	Cytisine and derivatives
Glyma.01G091400	M273T349_POS	0.61629	0.00645673	Naringenin-chalcone synthase / Flavonone synthase	Galaxolidone	Organoheterocyclic compounds	Benzopyrans	2-benzopyrans
Glyma.01G091400	M273T639_POS	0.526446	0.0248049	Naringenin-chalcone synthase / Flavonone synthase	Naringenin chalcone	Phenylpropanoids and polyketides	Linear 1,3-diarylpropanoids	Chalcones and dihydrochalcones
Glyma.01G091400	M276T512_POS	0.673031	0.00220527	Naringenin-chalcone synthase / Flavonone synthase	Physostigmine	Organoheterocyclic compounds	Indoles and derivatives	Pyrroloindoles
Glyma.01G091400	M277T74_POS	-0.526366	0.0248307	Naringenin-chalcone synthase / Flavonone synthase	6-Phosphogluconic acid	Organic oxygen compounds	Organooxygen compounds	Carbohydrates and carbohydrate conjugates
Glyma.01G091400	M287T661_POS	0.517102	0.0279798	Naringenin-chalcone synthase / Flavonone synthase	N1-(5-phospho-beta-D-ribosyl)glycinamide
Glyma.01G091400	M288T644_POS	0.50718	0.0316878	Naringenin-chalcone synthase / Flavonone synthase	(1S,2R)-1-C-(indol-3-yl)glycerol 3-phosphate
Glyma.01G091400	M288T742_POS	0.605421	0.00775658	Naringenin-chalcone synthase / Flavonone synthase	Lauryl diethanolamide	Lipids and lipid-like molecules	Fatty Acyls	Fatty amides
Glyma.01G091400	M298T830_POS	0.538183	0.0212233	Naringenin-chalcone synthase / Flavonone synthase	N7-methylguanosine
Glyma.01G091400	M300T287_POS	0.535589	0.0219775	Naringenin-chalcone synthase / Flavonone synthase	(R)-4-phosphopantothenate
Glyma.01G091400	M302T722_POS	0.536076	0.0218342	Naringenin-chalcone synthase / Flavonone synthase	CIF 3
Glyma.01G091400	M303T888_POS	0.732714	0.000543051	Naringenin-chalcone synthase / Flavonone synthase	(3R,4R)-3-(6-hydroxy-1,3-benzodioxol-5-yl)-3,4-dihydro-2H-chromene-4,7-diol
Glyma.01G091400	M307T108_NEG	0.65542	0.00314936	Naringenin-chalcone synthase / Flavonone synthase	(R)-5-Diphosphomevalonate	Organic oxygen compounds	Organic oxoanionic compounds	Organic pyrophosphates
Glyma.01G091400	M309T463_NEG	0.574049	0.0127287	Naringenin-chalcone synthase / Flavonone synthase	Sinapine	Phenylpropanoids and polyketides	Cinnamic acids and derivatives	Hydroxycinnamic acids and derivatives
Glyma.01G091400	M323T391_NEG	0.670334	0.00233238	Naringenin-chalcone synthase / Flavonone synthase	5-enolpyruvoyl-shikimate 3-phosphate
Glyma.01G091400	M336T913_POS	0.809938	4.62585e-05	Naringenin-chalcone synthase / Flavonone synthase	N4-(beta-N-acetyl-D-glucosaminyl)-L-asparagine
Glyma.01G091400	M338T700_POS	0.591835	0.00966995	Naringenin-chalcone synthase / Flavonone synthase	5-Hydroxymethyldeoxycytidylate	Nucleosides, nucleotides, and analogues	Pyrimidine nucleotides	Pyrimidine deoxyribonucleotides
Glyma.01G091400	M341T258_NEG	-0.544639	0.0194342	Naringenin-chalcone synthase / Flavonone synthase	1-Caffeoyl-beta-D-glucose	Phenylpropanoids and polyketides	Cinnamic acids and derivatives	Hydroxycinnamic acids and derivatives
Glyma.01G091400	M342T258_NEG	-0.55765	0.0161901	Naringenin-chalcone synthase / Flavonone synthase	DIBOA-Glc	Organic oxygen compounds	Organooxygen compounds	Carbohydrates and carbohydrate conjugates
Glyma.01G091400	M346T633_NEG	-0.548024	0.0185446	Naringenin-chalcone synthase / Flavonone synthase	AMP group
Glyma.01G091400	M347T786_POS	0.68818	0.00159266	Naringenin-chalcone synthase / Flavonone synthase	Corticosterone	Lipids and lipid-like molecules	Steroids and steroid derivatives	Hydroxysteroids
Glyma.01G091400	M356T437_NEG	-0.55219	0.0174946	Naringenin-chalcone synthase / Flavonone synthase	Cycro-DOPA-5-glucoside	Organic oxygen compounds	Organooxygen compounds	Carbohydrates and carbohydrate conjugates
Glyma.01G091400	M358T537_POS	-0.514235	0.0290148	Naringenin-chalcone synthase / Flavonone synthase	p-chloromercuribenzoate
Glyma.01G091400	M359T413_POS	0.590965	0.0098042	Naringenin-chalcone synthase / Flavonone synthase	Versiconal	Benzenoids	Anthracenes	Anthraquinones
Glyma.01G091400	M363T910_POS	0.802445	6.14541e-05	Naringenin-chalcone synthase / Flavonone synthase	3,6,9,12-Tetraoxatetracosan-1-ol	Organic oxygen compounds	Organooxygen compounds	Ethers
Glyma.01G091400	M363T922_NEG	0.735748	0.000500911	Naringenin-chalcone synthase / Flavonone synthase	XMP
Glyma.01G091400	M367T509_NEG	0.522662	0.0260547	Naringenin-chalcone synthase / Flavonone synthase	4-O-Methylxanthohumol	Phenylpropanoids and polyketides	Linear 1,3-diarylpropanoids	Chalcones and dihydrochalcones
Glyma.01G091400	M391T699_NEG	0.602318	0.00816401	Naringenin-chalcone synthase / Flavonone synthase	5-O-Demethylnobiletin
Glyma.01G091400	M399T68_POS	0.536485	0.0217145	Naringenin-chalcone synthase / Flavonone synthase	S-Adenosyl-L-methionine	Nucleosides, nucleotides, and analogues	5'-deoxyribonucleosides	5'-deoxy-5'-thionucleosides
Glyma.01G091400	M403T330_2_POS	0.520404	0.0268237	Naringenin-chalcone synthase / Flavonone synthase	Arachiside A	Organic oxygen compounds	Organooxygen compounds	Carbohydrates and carbohydrate conjugates
Glyma.01G091400	M430T906_POS	0.807509	5.07882e-05	Naringenin-chalcone synthase / Flavonone synthase	15alpha-Hydroxysolasodine	Lipids and lipid-like molecules	Steroids and steroid derivatives	Steroidal alkaloids
Glyma.01G091400	M433T374_POS	0.603581	0.00799619	Naringenin-chalcone synthase / Flavonone synthase	Apigenin-7-O-glucoside	Phenylpropanoids and polyketides	Flavonoids	Flavonoid glycosides
Glyma.01G091400	M435T268_POS	-0.555049	0.0168016	Naringenin-chalcone synthase / Flavonone synthase	Glutathionylspermidine	Organic acids and derivatives	Carboxylic acids and derivatives	Amino acids, peptides, and analogues
Glyma.01G091400	M435T443_POS	0.54925	0.0182308	Naringenin-chalcone synthase / Flavonone synthase	Reynoutrin	Phenylpropanoids and polyketides	Flavonoids	Flavonoid glycosides
Glyma.01G091400	M439T710_POS	0.504677	0.0326806	Naringenin-chalcone synthase / Flavonone synthase	Demethylphylloquinol	Lipids and lipid-like molecules	Prenol lipids	Diterpenoids
Glyma.01G091400	M451T384_NEG	-0.528104	0.0242721	Naringenin-chalcone synthase / Flavonone synthase	3''-Oxoribostamycin	Organic oxygen compounds	Organooxygen compounds	Carbohydrates and carbohydrate conjugates
Glyma.01G091400	M461T439_NEG	0.571358	0.013252	Naringenin-chalcone synthase / Flavonone synthase	gamma-L-Glutamyl-S-(hercyn-2-yl)-L-cysteine S-oxide	Organic acids and derivatives	Carboxylic acids and derivatives	Amino acids, peptides, and analogues
Glyma.01G091400	M471T243_NEG	0.828105	2.20105e-05	Naringenin-chalcone synthase / Flavonone synthase	Hassmarin	Phenylpropanoids and polyketides	Coumarins and derivatives	Pyranocoumarins
Glyma.01G091400	M522T303_POS	0.518758	0.0273952	Naringenin-chalcone synthase / Flavonone synthase	4-(cytidine 5-diphospho)-2-C-methyl-D-erythritol
Glyma.01G091400	M533T451_POS	0.525576	0.0250878	Naringenin-chalcone synthase / Flavonone synthase	Maackiain 3-O-glucosyl-6''-malonate	Phenylpropanoids and polyketides	Isoflavonoids	Furanoisoflavonoids
Glyma.01G091400	M551T379_NEG	-0.535097	0.0221228	Naringenin-chalcone synthase / Flavonone synthase	Lactucaside	Lignans, neolignans and related compounds	Lignan glycosides
Glyma.01G091400	M613T608_NEG	0.509349	0.0308462	Naringenin-chalcone synthase / Flavonone synthase	Neomycin B	Organic oxygen compounds	Organooxygen compounds	Carbohydrates and carbohydrate conjugates
Glyma.01G091400	M629T490_NEG	0.790046	9.58901e-05	Naringenin-chalcone synthase / Flavonone synthase	GDP-4-acetamido-4,6-dideoxy-alpha-D-mannose	Nucleosides, nucleotides, and analogues	Purine nucleotides	Purine nucleotide sugars
Glyma.01G091400	M640T413_POS	0.798818	7.02153e-05	Naringenin-chalcone synthase / Flavonone synthase	Demethyl-desacetyl-rifamycin S	Phenylpropanoids and polyketides	Macrolactams	NA
Glyma.01G091400	M650T557_NEG	-0.500168	0.0345293	Naringenin-chalcone synthase / Flavonone synthase	Triiodothyronine
Glyma.01G091400	M655T405_NEG	0.529153	0.0239396	Naringenin-chalcone synthase / Flavonone synthase	Patuletin 3-gentiobioside	Phenylpropanoids and polyketides	Flavonoids	Flavonoid glycosides
Glyma.01G091400	M736T565_NEG	-0.504728	0.03266	Naringenin-chalcone synthase / Flavonone synthase	Homotrypanothione	Organic acids and derivatives	Carboxylic acids and derivatives	Amino acids, peptides, and analogues
Glyma.01G091400	M74T103_POS	0.599531	0.00854448	Naringenin-chalcone synthase / Flavonone synthase	N,N-Dimethylformamide	Organic acids and derivatives	Carboxylic acids and derivatives	Carboxylic acid derivatives
Glyma.01G091400	M803T455_NEG	-0.555706	0.0166453	Naringenin-chalcone synthase / Flavonone synthase	Lactucain C	Organic acids and derivatives	Carboxylic acids and derivatives	Tetracarboxylic acids and derivatives
Glyma.01G091400	M86T68_POS	0.547192	0.0187602	Naringenin-chalcone synthase / Flavonone synthase	2-Pyrrolidone	Organoheterocyclic compounds	Pyrrolidines	Pyrrolidones
Glyma.01G091400	M86T98_POS	0.577843	0.012019	Naringenin-chalcone synthase / Flavonone synthase	N-Methylpyrrolidine	Organoheterocyclic compounds	Pyrrolidines	N-alkylpyrrolidines
Glyma.01G091400	M87T107_POS	0.604559	0.00786801	Naringenin-chalcone synthase / Flavonone synthase	Diacetyl	Organic oxygen compounds	Organooxygen compounds	Carbonyl compounds
Glyma.01G091400	M88T67_NEG	0.596886	0.00891869	Naringenin-chalcone synthase / Flavonone synthase	L-Alanine	Organic acids and derivatives	Carboxylic acids and derivatives	Amino acids, peptides, and analogues
Glyma.01G091400	M90T68_POS	0.833742	1.71776e-05	Naringenin-chalcone synthase / Flavonone synthase	beta-Alanine	Organic acids and derivatives	Carboxylic acids and derivatives	Amino acids, peptides, and analogues
Glyma.01G091400	M939T704_NEG	0.515623	0.0285098	Naringenin-chalcone synthase / Flavonone synthase	3-Rha(1-2)Gal(1-2)GluA-Soyasaponenol E	Lipids and lipid-like molecules	Prenol lipids	Terpene glycosides
Glyma.01G091400	M942T706_POS	0.518098	0.0276269	Naringenin-chalcone synthase / Flavonone synthase	Dehydrosoyasaponin I	Lipids and lipid-like molecules	Prenol lipids	Terpene glycosides
Glyma.01G091400	M99T75_POS	-0.550126	0.0180089	Naringenin-chalcone synthase / Flavonone synthase	Ortophosphate	Homogeneous non-metal compounds	Non-metal oxoanionic compounds	Non-metal phosphates
Glyma.01G228700	M1002T341_3_POS	-0.544705	0.0194165	Naringenin-chalcone synthase / Flavonone synthase	3-Oxo-OPC4-CoA	Lipids and lipid-like molecules	Fatty Acyls	Fatty acyl thioesters
Glyma.01G228700	M101T73_POS	-0.531627	0.0231698	Naringenin-chalcone synthase / Flavonone synthase	Tiglic acid	Lipids and lipid-like molecules	Fatty Acyls	Fatty acids and conjugates
Glyma.01G228700	M101T95_NEG	-0.512011	0.0298376	Naringenin-chalcone synthase / Flavonone synthase	2-Ketobutyric acid	Organic acids and derivatives	Keto acids and derivatives	Short-chain keto acids and derivatives
Glyma.01G228700	M102T71_POS	0.670088	0.0023443	Naringenin-chalcone synthase / Flavonone synthase	1-Aminocyclopropane-1-carboxylate	Organic acids and derivatives	Carboxylic acids and derivatives	Amino acids, peptides, and analogues
Glyma.01G228700	M104T65_NEG	0.659892	0.00288296	Naringenin-chalcone synthase / Flavonone synthase	Serine	Organic acids and derivatives	Carboxylic acids and derivatives	Amino acids, peptides, and analogues
Glyma.01G228700	M106T70_POS	0.668794	0.00240764	Naringenin-chalcone synthase / Flavonone synthase	L-Serine	Organic acids and derivatives	Carboxylic acids and derivatives	Amino acids, peptides, and analogues
Glyma.01G228700	M115T75_NEG	-0.859326	4.91253e-06	Naringenin-chalcone synthase / Flavonone synthase	Maleic acid	Organic acids and derivatives	Carboxylic acids and derivatives	Dicarboxylic acids and derivatives
Glyma.01G228700	M119T429_NEG	0.567555	0.0140208	Naringenin-chalcone synthase / Flavonone synthase	4-Vinylphenol	Benzenoids	Benzene and substituted derivatives	Styrenes
Glyma.01G228700	M119T67_NEG	-0.654187	0.00322623	Naringenin-chalcone synthase / Flavonone synthase	3,4-Dihydroxybutanoic acid	Organic acids and derivatives	Hydroxy acids and derivatives	Beta hydroxy acids and derivatives
Glyma.01G228700	M120T430_NEG	0.505421	0.0323831	Naringenin-chalcone synthase / Flavonone synthase	n-Phenylformamide	Benzenoids	Benzene and substituted derivatives	Anilides
Glyma.01G228700	M125T71_POS	0.528511	0.0241428	Naringenin-chalcone synthase / Flavonone synthase	Methylimidazole acetaldehyde	Organoheterocyclic compounds	Azoles	Imidazoles
Glyma.01G228700	M130T68_POS	0.603582	0.007996	Naringenin-chalcone synthase / Flavonone synthase	5-Oxoproline	Organic acids and derivatives	Carboxylic acids and derivatives	Amino acids, peptides, and analogues
Glyma.01G228700	M135T257_POS	-0.622321	0.00581548	Naringenin-chalcone synthase / Flavonone synthase	FEMA 3677	Organic acids and derivatives	Carboxylic acids and derivatives	Carboxylic acid derivatives
Glyma.01G228700	M135T258_NEG	-0.593145	0.0094703	Naringenin-chalcone synthase / Flavonone synthase	p-Hydroxyacetophenone	Organic oxygen compounds	Organooxygen compounds	Carbonyl compounds
Glyma.01G228700	M136T433_NEG	0.554327	0.0169745	Naringenin-chalcone synthase / Flavonone synthase	Anthranilic acid	Benzenoids	Benzene and substituted derivatives	Benzoic acids and derivatives
Glyma.01G228700	M137T479_POS	-0.525301	0.025178	Naringenin-chalcone synthase / Flavonone synthase	2-Hydroxyacetophenone	Organic oxygen compounds	Organooxygen compounds	Carbonyl compounds
Glyma.01G228700	M142T67_POS	0.565337	0.014485	Naringenin-chalcone synthase / Flavonone synthase	carbamoyl phosphate
Glyma.01G228700	M145T95_NEG	-0.540236	0.0206407	Naringenin-chalcone synthase / Flavonone synthase	alpha-Ketoglutaric acid	Organic acids and derivatives	Keto acids and derivatives	Gamma-keto acids and derivatives
Glyma.01G228700	M147T69_POS	0.700035	0.00121822	Naringenin-chalcone synthase / Flavonone synthase	L-Glutamine	Organic acids and derivatives	Carboxylic acids and derivatives	Amino acids, peptides, and analogues
Glyma.01G228700	M149T71_2_NEG	-0.531522	0.0232021	Naringenin-chalcone synthase / Flavonone synthase	Lyxose	Organic oxygen compounds	Organooxygen compounds	Carbohydrates and carbohydrate conjugates
Glyma.01G228700	M150T71_NEG	-0.535758	0.0219278	Naringenin-chalcone synthase / Flavonone synthase	Guanine	Organoheterocyclic compounds	Imidazopyrimidines	Purines and purine derivatives
Glyma.01G228700	M151T119_NEG	-0.579537	0.0117124	Naringenin-chalcone synthase / Flavonone synthase	Vanillin	Benzenoids	Phenols	Methoxyphenols
Glyma.01G228700	M151T71_NEG	-0.530361	0.0235612	Naringenin-chalcone synthase / Flavonone synthase	N1-Methyl-2-pyridone-5-carboxamide	Organoheterocyclic compounds	Pyridines and derivatives	Pyridinecarboxylic acids and derivatives
Glyma.01G228700	M154T63_NEG	0.563651	0.0148462	Naringenin-chalcone synthase / Flavonone synthase	Histidine	Organic acids and derivatives	Carboxylic acids and derivatives	Amino acids, peptides, and analogues
Glyma.01G228700	M155T63_NEG	0.556538	0.0164492	Naringenin-chalcone synthase / Flavonone synthase	Indole-3-acetonitrile	Organoheterocyclic compounds	Indoles and derivatives	Indoles
Glyma.01G228700	M158T107_NEG	0.516886	0.0280565	Naringenin-chalcone synthase / Flavonone synthase	5-Acetamidopentanoate	Lipids and lipid-like molecules	Fatty Acyls	Fatty acids and conjugates
Glyma.01G228700	M160T70_POS	-0.645571	0.00380765	Naringenin-chalcone synthase / Flavonone synthase	Calystegine A5	Alkaloids and derivatives	Tropane alkaloids
Glyma.01G228700	M161T69_POS	0.612756	0.00685836	Naringenin-chalcone synthase / Flavonone synthase	N(alpha)-Acetyl-L-2,4-diaminobutyrate	Organic acids and derivatives	Carboxylic acids and derivatives	Amino acids, peptides, and analogues
Glyma.01G228700	M163T430_NEG	0.598508	0.00868767	Naringenin-chalcone synthase / Flavonone synthase	trans-4-Coumaric acid	Phenylpropanoids and polyketides	Cinnamic acids and derivatives	Hydroxycinnamic acids and derivatives
Glyma.01G228700	M164T430_NEG	0.587445	0.0103632	Naringenin-chalcone synthase / Flavonone synthase	L-Methionine S-oxide	Organic acids and derivatives	Carboxylic acids and derivatives	Amino acids, peptides, and analogues
Glyma.01G228700	M165T68_NEG	-0.516664	0.0281358	Naringenin-chalcone synthase / Flavonone synthase	Ribonic acid	Organic oxygen compounds	Organooxygen compounds	Carbohydrates and carbohydrate conjugates
Glyma.01G228700	M166T68_NEG	-0.538721	0.0210693	Naringenin-chalcone synthase / Flavonone synthase	Pyridoxal	Organoheterocyclic compounds	Pyridines and derivatives	Pyridine carboxaldehydes
Glyma.01G228700	M167T281_NEG	-0.509693	0.0307147	Naringenin-chalcone synthase / Flavonone synthase	Vanillic acid	Benzenoids	Benzene and substituted derivatives	Benzoic acids and derivatives
Glyma.01G228700	M169T217_NEG	-0.624048	0.0056417	Naringenin-chalcone synthase / Flavonone synthase	3,4-Dihydroxyphenylethyleneglycol	Benzenoids	Phenols	Benzenediols
Glyma.01G228700	M169T61_POS	-0.50616	0.0320896	Naringenin-chalcone synthase / Flavonone synthase	phosphoenolpyruvate
Glyma.01G228700	M171T165_POS	-0.540872	0.0204631	Naringenin-chalcone synthase / Flavonone synthase	D-glyceraldehyde 3-phosphate
Glyma.01G228700	M172T298_POS	0.568109	0.0139066	Naringenin-chalcone synthase / Flavonone synthase	N-Butanoylhomoserine lactone	Organic acids and derivatives	Carboxylic acids and derivatives	Amino acids, peptides, and analogues
Glyma.01G228700	M173T421_NEG	0.751678	0.000321923	Naringenin-chalcone synthase / Flavonone synthase	Suberic acid	Lipids and lipid-like molecules	Fatty Acyls	Fatty acids and conjugates
Glyma.01G228700	M179T69_NEG	-0.507032	0.0317458	Naringenin-chalcone synthase / Flavonone synthase	Scyllitol	Organic oxygen compounds	Organooxygen compounds	Alcohols and polyols
Glyma.01G228700	M179T69_POS	-0.569066	0.0137112	Naringenin-chalcone synthase / Flavonone synthase	Coniferyl aldehyde	Benzenoids	Phenols	Methoxyphenols
Glyma.01G228700	M180T69_NEG	-0.519275	0.0272146	Naringenin-chalcone synthase / Flavonone synthase	7,8-Dihydroxanthopterin	Organoheterocyclic compounds	Pteridines and derivatives	Pterins and derivatives
Glyma.01G228700	M181T257_POS	-0.639666	0.00425352	Naringenin-chalcone synthase / Flavonone synthase	4-hydroxyphenyl pyruvate	Benzenoids	Benzene and substituted derivatives	Phenylpyruvic acid derivatives
Glyma.01G228700	M181T65_NEG	-0.52909	0.0239596	Naringenin-chalcone synthase / Flavonone synthase	D-Mannitol	Organic oxygen compounds	Organooxygen compounds	Carbohydrates and carbohydrate conjugates
Glyma.01G228700	M185T66_POS	0.609886	0.00719925	Naringenin-chalcone synthase / Flavonone synthase	5-Hydroxyisourate	Organoheterocyclic compounds	Imidazopyrimidines	Purines and purine derivatives
Glyma.01G228700	M187T69_POS	0.560342	0.0155758	Naringenin-chalcone synthase / Flavonone synthase	3-maleylpyruvate
Glyma.01G228700	M188T76_NEG	0.566832	0.0141708	Naringenin-chalcone synthase / Flavonone synthase	N-Acetylglutamic acid	Organic acids and derivatives	Carboxylic acids and derivatives	Amino acids, peptides, and analogues
Glyma.01G228700	M189T63_POS	0.506975	0.0317683	Naringenin-chalcone synthase / Flavonone synthase	NE,NE,NE-TRIMETHYLLYSINE	Organic acids and derivatives	Carboxylic acids and derivatives	Amino acids, peptides, and analogues
Glyma.01G228700	M189T72_NEG	-0.549173	0.0182503	Naringenin-chalcone synthase / Flavonone synthase	Oxalosuccinate	Organic acids and derivatives	Carboxylic acids and derivatives	Tricarboxylic acids and derivatives
Glyma.01G228700	M195T215_POS	-0.609747	0.00721603	Naringenin-chalcone synthase / Flavonone synthase	Methyl caffeate	Phenylpropanoids and polyketides	Cinnamic acids and derivatives	Hydroxycinnamic acids and derivatives
Glyma.01G228700	M195T70_POS	-0.514903	0.0287708	Naringenin-chalcone synthase / Flavonone synthase	Caffeine	Organoheterocyclic compounds	Imidazopyrimidines	Purines and purine derivatives
Glyma.01G228700	M197T292_POS	-0.63253	0.00484837	Naringenin-chalcone synthase / Flavonone synthase	2,4,5-Trimethoxybenzaldehyde	Benzenoids	Benzene and substituted derivatives	Benzoyl derivatives
Glyma.01G228700	M199T345_POS	-0.64271	0.0040186	Naringenin-chalcone synthase / Flavonone synthase	Syringic acid	Benzenoids	Benzene and substituted derivatives	Benzoic acids and derivatives
Glyma.01G228700	M201T74_POS	0.553255	0.0172339	Naringenin-chalcone synthase / Flavonone synthase	D-erythrose 4-phosphate
Glyma.01G228700	M207T68_NEG	-0.557357	0.0162579	Naringenin-chalcone synthase / Flavonone synthase	Dihydrolipoate	Lipids and lipid-like molecules	Fatty Acyls	Fatty acids and conjugates
Glyma.01G228700	M209T109_POS	-0.530982	0.0233686	Naringenin-chalcone synthase / Flavonone synthase	Fraxetin	Phenylpropanoids and polyketides	Coumarins and derivatives	Hydroxycoumarins
Glyma.01G228700	M209T486_POS	-0.511657	0.0299703	Naringenin-chalcone synthase / Flavonone synthase	Sinapoyl aldehyde	Benzenoids	Phenols	Methoxyphenols
Glyma.01G228700	M209T507_POS	-0.576653	0.012238	Naringenin-chalcone synthase / Flavonone synthase	Ferulic acid methyl ester	Phenylpropanoids and polyketides	Cinnamic acids and derivatives	Hydroxycinnamic acids and derivatives
Glyma.01G228700	M211T138_NEG	-0.55351	0.0171718	Naringenin-chalcone synthase / Flavonone synthase	2-Hydroxy-6-ketononatrienedioate	Organic acids and derivatives	Keto acids and derivatives	Medium-chain keto acids and derivatives
Glyma.01G228700	M212T318_NEG	-0.539902	0.0207346	Naringenin-chalcone synthase / Flavonone synthase	N,N-Dihydroxy-L-tyrosine	Organic acids and derivatives	Carboxylic acids and derivatives	Amino acids, peptides, and analogues
Glyma.01G228700	M215T67_NEG	-0.61378	0.00674003	Naringenin-chalcone synthase / Flavonone synthase	2-C-Methyl-D-erythritol 4-phosphate	Organic acids and derivatives	Organic phosphoric acids and derivatives	Phosphate esters
Glyma.01G228700	M217T408_NEG	-0.530877	0.0234012	Naringenin-chalcone synthase / Flavonone synthase	2-Hydroxydecanedioic acid	Organic acids and derivatives	Hydroxy acids and derivatives	Medium-chain hydroxy acids and derivatives
Glyma.01G228700	M217T482_POS	-0.629083	0.00515899	Naringenin-chalcone synthase / Flavonone synthase	5-Carboxy-2-oxohept-3-enedioate	Organic acids and derivatives	Carboxylic acids and derivatives	Tricarboxylic acids and derivatives
Glyma.01G228700	M218T408_NEG	-0.525551	0.025096	Naringenin-chalcone synthase / Flavonone synthase	4-amino-2-methyl-5-(phosphooxymethyl)pyrimidine
Glyma.01G228700	M219T508_POS	-0.571422	0.0132395	Naringenin-chalcone synthase / Flavonone synthase	(3E,7E)-4,8,12-Trimethyl-1,3,7,11-tridecatetraene	Lipids and lipid-like molecules	Prenol lipids	Sesquiterpenoids
Glyma.01G228700	M220T74_POS	-0.670687	0.0023154	Naringenin-chalcone synthase / Flavonone synthase	O-Succinyl-L-homoserine	Organic acids and derivatives	Carboxylic acids and derivatives	Amino acids, peptides, and analogues
Glyma.01G228700	M221T139_POS	-0.550589	0.0178925	Naringenin-chalcone synthase / Flavonone synthase	5-Hydroxy-L-tryptophan	Organoheterocyclic compounds	Indoles and derivatives	Tryptamines and derivatives
Glyma.01G228700	M225T351_POS	-0.518083	0.0276322	Naringenin-chalcone synthase / Flavonone synthase	Methyl jasmonate	Lipids and lipid-like molecules	Fatty Acyls	Lineolic acids and derivatives
Glyma.01G228700	M241T345_POS	-0.570065	0.0135096	Naringenin-chalcone synthase / Flavonone synthase	(1R,6R)-6-Hydroxy-2-succinylcyclohexa-2,4-diene-1-carboxylate	Organic acids and derivatives	Keto acids and derivatives	Gamma-keto acids and derivatives
Glyma.01G228700	M243T63_POS	-0.630662	0.00501473	Naringenin-chalcone synthase / Flavonone synthase	2-hydroxy-5-(methylsulfanyl)-3-oxopent-1-enyl 1-phosphate
Glyma.01G228700	M243T798_NEG	0.531789	0.02312	Naringenin-chalcone synthase / Flavonone synthase	beta-Hydroxymyristic acid	Lipids and lipid-like molecules	Fatty Acyls	Fatty acids and conjugates
Glyma.01G228700	M249T727_NEG	0.530032	0.023664	Naringenin-chalcone synthase / Flavonone synthase	Viscic acid	Lipids and lipid-like molecules	Prenol lipids	Sesquiterpenoids
Glyma.01G228700	M257T69_2_POS	-0.508192	0.031293	Naringenin-chalcone synthase / Flavonone synthase	Isoliquiritigenin	Phenylpropanoids and polyketides	Linear 1,3-diarylpropanoids	Chalcones and dihydrochalcones
Glyma.01G228700	M259T126_POS	0.559372	0.0157949	Naringenin-chalcone synthase / Flavonone synthase	(1-Ribosylimidazole)-4-acetate	Nucleosides, nucleotides, and analogues	Imidazole ribonucleosides and ribonucleotides	NA
Glyma.01G228700	M260T237_NEG	-0.659623	0.00289843	Naringenin-chalcone synthase / Flavonone synthase	(-)-N-(N-Acetylaminomethyl)cytisine	Alkaloids and derivatives	Lupin alkaloids	Cytisine and derivatives
Glyma.01G228700	M261T70_NEG	-0.524968	0.0252873	Naringenin-chalcone synthase / Flavonone synthase	D-Mannitol 1-phosphate	Organic oxygen compounds	Organooxygen compounds	Carbohydrates and carbohydrate conjugates
Glyma.01G228700	M264T72_POS	0.634071	0.0047145	Naringenin-chalcone synthase / Flavonone synthase	Ascorbalamic acid	Organic acids and derivatives	Carboxylic acids and derivatives	Amino acids, peptides, and analogues
Glyma.01G228700	M273T388_POS	-0.577313	0.0121163	Naringenin-chalcone synthase / Flavonone synthase	Deoxyshikonin	Benzenoids	Naphthalenes	Naphthoquinones
Glyma.01G228700	M275T77_NEG	-0.517162	0.0279584	Naringenin-chalcone synthase / Flavonone synthase	6-Phospho-D-gluconate	Organic oxygen compounds	Organooxygen compounds	Carbohydrates and carbohydrate conjugates
Glyma.01G228700	M276T512_POS	0.642214	0.00405617	Naringenin-chalcone synthase / Flavonone synthase	Physostigmine	Organoheterocyclic compounds	Indoles and derivatives	Pyrroloindoles
Glyma.01G228700	M277T74_POS	-0.68642	0.00165563	Naringenin-chalcone synthase / Flavonone synthase	6-Phosphogluconic acid	Organic oxygen compounds	Organooxygen compounds	Carbohydrates and carbohydrate conjugates
Glyma.01G228700	M283T521_NEG	0.593907	0.00935579	Naringenin-chalcone synthase / Flavonone synthase	2-Phenylethyl beta-D-glucopyranoside	Organic oxygen compounds	Organooxygen compounds	Carbohydrates and carbohydrate conjugates
Glyma.01G228700	M285T308_POS	-0.539377	0.020883	Naringenin-chalcone synthase / Flavonone synthase	xanthosine
Glyma.01G228700	M286T347_NEG	-0.605858	0.00770053	Naringenin-chalcone synthase / Flavonone synthase	Grandisine III	Organoheterocyclic compounds	Quinolines and derivatives	Benzoquinolines
Glyma.01G228700	M287T661_POS	0.589755	0.00999364	Naringenin-chalcone synthase / Flavonone synthase	N1-(5-phospho-beta-D-ribosyl)glycinamide
Glyma.01G228700	M290T635_POS	-0.61131	0.00702848	Naringenin-chalcone synthase / Flavonone synthase	N-Succinyl-2-L-amino-6-oxoheptanedioate	Organic acids and derivatives	Carboxylic acids and derivatives	Amino acids, peptides, and analogues
Glyma.01G228700	M291T360_NEG	-0.52945	0.0238461	Naringenin-chalcone synthase / Flavonone synthase	cis-5-Methoxydecursidinol	Phenylpropanoids and polyketides	Coumarins and derivatives	Pyranocoumarins
Glyma.01G228700	M293T636_NEG	-0.50199	0.0337726	Naringenin-chalcone synthase / Flavonone synthase	Cyclic dehypoxanthine futalosine	Benzenoids	Naphthalenes	Naphthalenecarboxylic acids and derivatives
Glyma.01G228700	M293T902_POS	0.589972	0.0099595	Naringenin-chalcone synthase / Flavonone synthase	Methyl (9Z,12Z,15Z)-9,12,15-octadecatrienoate	Lipids and lipid-like molecules	Fatty Acyls	Lineolic acids and derivatives
Glyma.01G228700	M295T780_NEG	0.509586	0.0307554	Naringenin-chalcone synthase / Flavonone synthase	13(S)-HODE	Lipids and lipid-like molecules	Fatty Acyls	Lineolic acids and derivatives
Glyma.01G228700	M297T512_NEG	0.51576	0.0284605	Naringenin-chalcone synthase / Flavonone synthase	2',5-Dihydroxy-6,7-methylenedioxyisoflavone	Phenylpropanoids and polyketides	Isoflavonoids	Isoflav-2-enes
Glyma.01G228700	M301T503_POS	-0.60179	0.00823503	Naringenin-chalcone synthase / Flavonone synthase	Astraciceran	Phenylpropanoids and polyketides	Isoflavonoids	O-methylated isoflavonoids
Glyma.01G228700	M301T530_NEG	-0.533142	0.0227079	Naringenin-chalcone synthase / Flavonone synthase	(-)-Mucronulatol	Phenylpropanoids and polyketides	Isoflavonoids	O-methylated isoflavonoids
Glyma.01G228700	M305T440_POS	0.527435	0.024486	Naringenin-chalcone synthase / Flavonone synthase	Nopaline	Organic acids and derivatives	Carboxylic acids and derivatives	Amino acids, peptides, and analogues
Glyma.01G228700	M307T108_NEG	0.556199	0.0165289	Naringenin-chalcone synthase / Flavonone synthase	(R)-5-Diphosphomevalonate	Organic oxygen compounds	Organic oxoanionic compounds	Organic pyrophosphates
Glyma.01G228700	M312T554_NEG	-0.53022	0.0236051	Naringenin-chalcone synthase / Flavonone synthase	N-cis-Feruloyltyramine	Phenylpropanoids and polyketides	Cinnamic acids and derivatives	Hydroxycinnamic acids and derivatives
Glyma.01G228700	M314T150_NEG	-0.556386	0.0164849	Naringenin-chalcone synthase / Flavonone synthase	Citpressine II	Organoheterocyclic compounds	Quinolines and derivatives	Benzoquinolines
Glyma.01G228700	M319T453_POS	-0.548064	0.0185345	Naringenin-chalcone synthase / Flavonone synthase	[3aR-(3aalpha,4alpha,9aalpha,9bbeta)]-4-(Acetyloxy)-3,3a,4,5,9a,9b-hexahydro-9-(hydroxymethyl)-6-methyl-3-methylene-azuleno[4,5-b]furan-2,7-dione	Organoheterocyclic compounds	Lactones	Gamma butyrolactones
Glyma.01G228700	M321T508_POS	-0.689001	0.001564	Naringenin-chalcone synthase / Flavonone synthase	Dihydromyricetin	Phenylpropanoids and polyketides	Flavonoids	Flavans
Glyma.01G228700	M321T608_POS	-0.544876	0.0193708	Naringenin-chalcone synthase / Flavonone synthase	Ampelopsin	Phenylpropanoids and polyketides	Flavonoids	Flavans
Glyma.01G228700	M323T362_POS	-0.59047	0.0098814	Naringenin-chalcone synthase / Flavonone synthase	Leucodelphinidin	Phenylpropanoids and polyketides	Flavonoids	Flavans
Glyma.01G228700	M323T391_NEG	0.689145	0.00155901	Naringenin-chalcone synthase / Flavonone synthase	5-enolpyruvoyl-shikimate 3-phosphate
Glyma.01G228700	M323T538_POS	-0.54506	0.0193218	Naringenin-chalcone synthase / Flavonone synthase	N-((R)-Pantothenoyl)-L-cysteine	Organic acids and derivatives	Peptidomimetics	Hybrid peptides
Glyma.01G228700	M327T653_NEG	0.575014	0.012545	Naringenin-chalcone synthase / Flavonone synthase	CIF 2	Organic acids and derivatives	Carboxylic acids and derivatives	Amino acids, peptides, and analogues
Glyma.01G228700	M336T913_POS	0.504371	0.0328034	Naringenin-chalcone synthase / Flavonone synthase	N4-(beta-N-acetyl-D-glucosaminyl)-L-asparagine
Glyma.01G228700	M337T69_POS	-0.63682	0.00448314	Naringenin-chalcone synthase / Flavonone synthase	5-O-Caffeoylshikimic acid	Phenylpropanoids and polyketides	Cinnamic acids and derivatives	Hydroxycinnamic acids and derivatives
Glyma.01G228700	M337T70_NEG	-0.513044	0.029453	Naringenin-chalcone synthase / Flavonone synthase	p-Coumaroyl quinic acid	Organic oxygen compounds	Organooxygen compounds	Alcohols and polyols
Glyma.01G228700	M341T258_NEG	-0.612738	0.00686054	Naringenin-chalcone synthase / Flavonone synthase	1-Caffeoyl-beta-D-glucose	Phenylpropanoids and polyketides	Cinnamic acids and derivatives	Hydroxycinnamic acids and derivatives
Glyma.01G228700	M341T444_POS	-0.510431	0.0304334	Naringenin-chalcone synthase / Flavonone synthase	Glyceollidin I	Phenylpropanoids and polyketides	Isoflavonoids	Furanoisoflavonoids
Glyma.01G228700	M341T538_POS	-0.526863	0.02467	Naringenin-chalcone synthase / Flavonone synthase	Desmethylxanthohumol	Phenylpropanoids and polyketides	Linear 1,3-diarylpropanoids	Chalcones and dihydrochalcones
Glyma.01G228700	M342T258_NEG	-0.613087	0.00681991	Naringenin-chalcone synthase / Flavonone synthase	DIBOA-Glc	Organic oxygen compounds	Organooxygen compounds	Carbohydrates and carbohydrate conjugates
Glyma.01G228700	M343T466_POS	-0.570649	0.0133928	Naringenin-chalcone synthase / Flavonone synthase	5,7,3',4'-Tetramethoxyflavone	Phenylpropanoids and polyketides	Flavonoids	O-methylated flavonoids
Glyma.01G228700	M345T433_POS	-0.55248	0.0174233	Naringenin-chalcone synthase / Flavonone synthase	Melibiitol	Lipids and lipid-like molecules	Fatty Acyls	Fatty acyl glycosides
Glyma.01G228700	M346T633_NEG	-0.558016	0.0161053	Naringenin-chalcone synthase / Flavonone synthase	AMP group
Glyma.01G228700	M353T150_POS	-0.63264	0.00483866	Naringenin-chalcone synthase / Flavonone synthase	Arbutin 6-phosphate	Organic oxygen compounds	Organooxygen compounds	Carbohydrates and carbohydrate conjugates
Glyma.01G228700	M353T649_1_POS	-0.51278	0.029551	Naringenin-chalcone synthase / Flavonone synthase	Citrusinol	Phenylpropanoids and polyketides	Flavonoids	Pyranoflavonoids
Glyma.01G228700	M353T70_NEG	-0.573599	0.012815	Naringenin-chalcone synthase / Flavonone synthase	Chlorogenate	Organic oxygen compounds	Organooxygen compounds	Alcohols and polyols
Glyma.01G228700	M355T329_NEG	0.522233	0.0261995	Naringenin-chalcone synthase / Flavonone synthase	5-amino-6-(5-phospho-D-ribitylamino)uracil
Glyma.01G228700	M355T451_NEG	-0.537675	0.0213694	Naringenin-chalcone synthase / Flavonone synthase	Gentiopicrin	Organic oxygen compounds	Organooxygen compounds	Carbohydrates and carbohydrate conjugates
Glyma.01G228700	M355T551_POS	-0.531631	0.0231686	Naringenin-chalcone synthase / Flavonone synthase	3,5,4'-Trihydroxy-6'',6''-dimethylpyrano[2'',3'':7,8]flavanone	Phenylpropanoids and polyketides	Flavonoids	Pyranoflavonoids
Glyma.01G228700	M356T437_NEG	-0.591782	0.00967806	Naringenin-chalcone synthase / Flavonone synthase	Cycro-DOPA-5-glucoside	Organic oxygen compounds	Organooxygen compounds	Carbohydrates and carbohydrate conjugates
Glyma.01G228700	M357T455_NEG	-0.515322	0.028619	Naringenin-chalcone synthase / Flavonone synthase	Dehydrodiconiferyl alcohol	Phenylpropanoids and polyketides	2-arylbenzofuran flavonoids
Glyma.01G228700	M357T481_POS	-0.514523	0.0289092	Naringenin-chalcone synthase / Flavonone synthase	Norsolorinic acid anthrone	Benzenoids	Anthracenes	NA
Glyma.01G228700	M357T605_POS	-0.522475	0.0261177	Naringenin-chalcone synthase / Flavonone synthase	Pluviatilol	Lignans, neolignans and related compounds	Furanoid lignans
Glyma.01G228700	M358T537_POS	-0.533822	0.0225033	Naringenin-chalcone synthase / Flavonone synthase	p-chloromercuribenzoate
Glyma.01G228700	M359T291_POS	-0.573478	0.0128384	Naringenin-chalcone synthase / Flavonone synthase	10-Deoxygeniposidic acid	Lipids and lipid-like molecules	Prenol lipids	Terpene glycosides
Glyma.01G228700	M359T442_POS	-0.553154	0.0172583	Naringenin-chalcone synthase / Flavonone synthase	Matairesinol	Lignans, neolignans and related compounds	Furanoid lignans	Tetrahydrofuran lignans
Glyma.01G228700	M359T548_POS	-0.516755	0.0281036	Naringenin-chalcone synthase / Flavonone synthase	N1-(5-Phospho-alpha-D-ribosyl)-5,6-dimethylbenzimidazole	Nucleosides, nucleotides, and analogues	Benzimidazole ribonucleosides and ribonucleotides	NA
Glyma.01G228700	M361T191_POS	-0.525364	0.0251573	Naringenin-chalcone synthase / Flavonone synthase	7-Deoxyloganate	Lipids and lipid-like molecules	Prenol lipids	Terpene glycosides
Glyma.01G228700	M363T475_NEG	0.51182	0.0299091	Naringenin-chalcone synthase / Flavonone synthase	Gibberellin A37 open lactone	Lipids and lipid-like molecules	Prenol lipids	Diterpenoids
Glyma.01G228700	M363T910_POS	0.503253	0.033256	Naringenin-chalcone synthase / Flavonone synthase	3,6,9,12-Tetraoxatetracosan-1-ol	Organic oxygen compounds	Organooxygen compounds	Ethers
Glyma.01G228700	M364T88_POS	0.595911	0.00905998	Naringenin-chalcone synthase / Flavonone synthase	GMP	Nucleosides, nucleotides, and analogues	Purine nucleotides	Purine ribonucleotides
Glyma.01G228700	M369T484_NEG	-0.528374	0.0241863	Naringenin-chalcone synthase / Flavonone synthase	D-sedoheptulose 1,7-bisphosphate
Glyma.01G228700	M371T648_POS	-0.543707	0.0196847	Naringenin-chalcone synthase / Flavonone synthase	4,4'-Bis(2-carboxyvinyl)-3,3'-dimethoxydiphenyl ether	Benzenoids	Benzene and substituted derivatives	Diphenylethers
Glyma.01G228700	M373T217_NEG	-0.60241	0.0081517	Naringenin-chalcone synthase / Flavonone synthase	Geniposidic acid	Lipids and lipid-like molecules	Prenol lipids	Terpene glycosides
Glyma.01G228700	M373T732_POS	0.603892	0.00795524	Naringenin-chalcone synthase / Flavonone synthase	5,7,2',3',4'-Pentamethoxyflavone	Phenylpropanoids and polyketides	Flavonoids	O-methylated flavonoids
Glyma.01G228700	M375T507_POS	-0.513117	0.0294259	Naringenin-chalcone synthase / Flavonone synthase	5,7,2',3',4'-Pentamethoxyflavanone	Phenylpropanoids and polyketides	Flavonoids	O-methylated flavonoids
Glyma.01G228700	M389T227_POS	-0.588279	0.0102285	Naringenin-chalcone synthase / Flavonone synthase	Isobetanidin	Organoheterocyclic compounds	Indoles and derivatives
Glyma.01G228700	M389T557_POS	-0.553513	0.0171711	Naringenin-chalcone synthase / Flavonone synthase	(+-)-Strigol acetate	Lipids and lipid-like molecules	Prenol lipids	Terpene lactones
Glyma.01G228700	M393T82_NEG	-0.527004	0.0246243	Naringenin-chalcone synthase / Flavonone synthase	Epithienamycin F	Organoheterocyclic compounds	Lactams	Beta lactams
Glyma.01G228700	M399T441_POS	-0.577411	0.0120982	Naringenin-chalcone synthase / Flavonone synthase	S-(5'-Adenosyl)-L-methionine chloride	Nucleosides, nucleotides, and analogues	5'-deoxyribonucleosides	5'-deoxy-5'-thionucleosides
Glyma.01G228700	M399T609_NEG	-0.518241	0.0275768	Naringenin-chalcone synthase / Flavonone synthase	Versiconal hemiacetal acetate	Benzenoids	Anthracenes	Anthraquinones
Glyma.01G228700	M404T909_POS	-0.534599	0.0222709	Naringenin-chalcone synthase / Flavonone synthase	CDP group
Glyma.01G228700	M413T366_NEG	-0.578882	0.0118303	Naringenin-chalcone synthase / Flavonone synthase	Asperuloside	Organic oxygen compounds	Organooxygen compounds	Carbohydrates and carbohydrate conjugates
Glyma.01G228700	M414T366_NEG	-0.565885	0.0143692	Naringenin-chalcone synthase / Flavonone synthase	N6-(delta2-Isopentenyl)-adenosine 5'-monophosphate	Nucleosides, nucleotides, and analogues	Purine nucleotides	Purine ribonucleotides
Glyma.01G228700	M420T549_POS	0.505104	0.0325094	Naringenin-chalcone synthase / Flavonone synthase	Cyanidin 3-xyloside	Phenylpropanoids and polyketides	Flavonoids	Flavonoid glycosides
Glyma.01G228700	M421T437_NEG	-0.535307	0.0220606	Naringenin-chalcone synthase / Flavonone synthase	Crepidiaside A	Organic oxygen compounds	Organooxygen compounds	Carbohydrates and carbohydrate conjugates
Glyma.01G228700	M430T906_POS	0.527575	0.0244412	Naringenin-chalcone synthase / Flavonone synthase	15alpha-Hydroxysolasodine	Lipids and lipid-like molecules	Steroids and steroid derivatives	Steroidal alkaloids
Glyma.01G228700	M433T374_POS	0.56026	0.0155942	Naringenin-chalcone synthase / Flavonone synthase	Apigenin-7-O-glucoside	Phenylpropanoids and polyketides	Flavonoids	Flavonoid glycosides
Glyma.01G228700	M433T426_NEG	0.546428	0.01896	Naringenin-chalcone synthase / Flavonone synthase	naringenin-7-O-glucoside	Phenylpropanoids and polyketides	Flavonoids	Flavonoid glycosides
Glyma.01G228700	M434T449_POS	0.552804	0.0173438	Naringenin-chalcone synthase / Flavonone synthase	Peonidin 3-arabinoside	Phenylpropanoids and polyketides	Flavonoids	Flavonoid glycosides
Glyma.01G228700	M435T268_POS	-0.585238	0.0107267	Naringenin-chalcone synthase / Flavonone synthase	Glutathionylspermidine	Organic acids and derivatives	Carboxylic acids and derivatives	Amino acids, peptides, and analogues
Glyma.01G228700	M439T509_NEG	-0.503539	0.0331395	Naringenin-chalcone synthase / Flavonone synthase	Cichorioside B	Organic oxygen compounds	Organooxygen compounds	Carbohydrates and carbohydrate conjugates
Glyma.01G228700	M443T608_POS	-0.567846	0.0139606	Naringenin-chalcone synthase / Flavonone synthase	(-)-Epicatechin 3-O-gallate	Phenylpropanoids and polyketides	Flavonoids	Flavans
Glyma.01G228700	M445T355_2_POS	-0.517063	0.0279936	Naringenin-chalcone synthase / Flavonone synthase	(13S,14R)-1,8-Dihydroxy-13-O-acetyl-N-methylcanadine	Alkaloids and derivatives	Protoberberine alkaloids and derivatives	NA
Glyma.01G228700	M448T464_NEG	0.513355	0.029338	Naringenin-chalcone synthase / Flavonone synthase	Cyanidin 3-O-beta-D-galactopyranoside	Phenylpropanoids and polyketides	Flavonoids	Flavonoid glycosides
Glyma.01G228700	M451T384_NEG	-0.660287	0.00286036	Naringenin-chalcone synthase / Flavonone synthase	3''-Oxoribostamycin	Organic oxygen compounds	Organooxygen compounds	Carbohydrates and carbohydrate conjugates
Glyma.01G228700	M453T349_POS	-0.658086	0.00298824	Naringenin-chalcone synthase / Flavonone synthase	Sieboldin	Phenylpropanoids and polyketides	Flavonoids	Flavonoid glycosides
Glyma.01G228700	M457T431_POS	-0.560657	0.015505	Naringenin-chalcone synthase / Flavonone synthase	Phytyl pyrophosphate	Lipids and lipid-like molecules	Prenol lipids	Diterpenoids
Glyma.01G228700	M461T439_NEG	0.660136	0.00286899	Naringenin-chalcone synthase / Flavonone synthase	gamma-L-Glutamyl-S-(hercyn-2-yl)-L-cysteine S-oxide	Organic acids and derivatives	Carboxylic acids and derivatives	Amino acids, peptides, and analogues
Glyma.01G228700	M462T445_POS	-0.523683	0.0257128	Naringenin-chalcone synthase / Flavonone synthase	D-Glucosylsphingosine	Lipids and lipid-like molecules	Sphingolipids	Glycosphingolipids
Glyma.01G228700	M469T539_POS	-0.55138	0.017695	Naringenin-chalcone synthase / Flavonone synthase	Gentamicin A	Organic oxygen compounds	Organooxygen compounds	Carbohydrates and carbohydrate conjugates
Glyma.01G228700	M471T243_NEG	0.574086	0.0127215	Naringenin-chalcone synthase / Flavonone synthase	Hassmarin	Phenylpropanoids and polyketides	Coumarins and derivatives	Pyranocoumarins
Glyma.01G228700	M482T944_NEG	-0.584641	0.0108267	Naringenin-chalcone synthase / Flavonone synthase	C31-phthiodiolone A
Glyma.01G228700	M484T944_NEG	-0.504153	0.0328913	Naringenin-chalcone synthase / Flavonone synthase	C31-phthiotriol
Glyma.01G228700	M490T337_NEG	-0.550388	0.0179428	Naringenin-chalcone synthase / Flavonone synthase	Demethylalangiside	Organic oxygen compounds	Organooxygen compounds	Carbohydrates and carbohydrate conjugates
Glyma.01G228700	M490T67_NEG	0.502843	0.0334231	Naringenin-chalcone synthase / Flavonone synthase	dATP
Glyma.01G228700	M491T397_NEG	0.523079	0.0259145	Naringenin-chalcone synthase / Flavonone synthase	Limocitrin 3-rhamnoside	Phenylpropanoids and polyketides	Flavonoids	Flavonoid glycosides
Glyma.01G228700	M496T670_POS	-0.566951	0.0141461	Naringenin-chalcone synthase / Flavonone synthase	N6-(Delta2-isopentenyl)-adenosine 5-diphosphate
Glyma.01G228700	M503T463_POS	-0.501107	0.0341379	Naringenin-chalcone synthase / Flavonone synthase	Shihulimonin A	Lipids and lipid-like molecules	Prenol lipids	Triterpenoids
Glyma.01G228700	M506T463_POS	-0.516511	0.0281907	Naringenin-chalcone synthase / Flavonone synthase	Alangiside	Organic oxygen compounds	Organooxygen compounds	Carbohydrates and carbohydrate conjugates
Glyma.01G228700	M508T508_POS	-0.629478	0.00512262	Naringenin-chalcone synthase / Flavonone synthase	Delphinidin 3-(6''-acetylglucoside)	Phenylpropanoids and polyketides	Flavonoids	Flavonoid glycosides
Glyma.01G228700	M515T649_POS	-0.560813	0.0154702	Naringenin-chalcone synthase / Flavonone synthase	2'',6''-O-Diacetyloninin	Phenylpropanoids and polyketides	Isoflavonoids	Isoflavonoid O-glycosides
Glyma.01G228700	M529T777_NEG	0.504013	0.0329478	Naringenin-chalcone synthase / Flavonone synthase	1,10-Bis(dihydrocaffeoyl)spermine	Benzenoids	Phenols	Benzenediols
Glyma.01G228700	M533T451_POS	0.548954	0.0183062	Naringenin-chalcone synthase / Flavonone synthase	Maackiain 3-O-glucosyl-6''-malonate	Phenylpropanoids and polyketides	Isoflavonoids	Furanoisoflavonoids
Glyma.01G228700	M534T478_NEG	-0.554827	0.0168546	Naringenin-chalcone synthase / Flavonone synthase	5''-Phosphoribosylparomamine	Organic oxygen compounds	Organooxygen compounds	Carbohydrates and carbohydrate conjugates
Glyma.01G228700	M534T491_POS	-0.514323	0.0289825	Naringenin-chalcone synthase / Flavonone synthase	CDP-abequose	Nucleosides, nucleotides, and analogues	Pyrimidine nucleotides	Pyrimidine nucleotide sugars
Glyma.01G228700	M538T401_NEG	-0.579909	0.011646	Naringenin-chalcone synthase / Flavonone synthase	8-oxo-GTP
Glyma.01G228700	M538T463_POS	-0.501907	0.033807	Naringenin-chalcone synthase / Flavonone synthase	m7GTP
Glyma.01G228700	M539T335_NEG	-0.50755	0.0315429	Naringenin-chalcone synthase / Flavonone synthase	Citrumarin B	Phenylpropanoids and polyketides	Coumarins and derivatives	Pyranocoumarins
Glyma.01G228700	M543T526_POS	-0.594543	0.00926112	Naringenin-chalcone synthase / Flavonone synthase	Chaetoglobosin N	Alkaloids and derivatives	Cytochalasans	Chaetoglobosins
Glyma.01G228700	M551T379_NEG	-0.625029	0.00554492	Naringenin-chalcone synthase / Flavonone synthase	Lactucaside	Lignans, neolignans and related compounds	Lignan glycosides
Glyma.01G228700	M562T496_POS	-0.576567	0.012254	Naringenin-chalcone synthase / Flavonone synthase	Malvidin 3-glucoside-pyruvate	Phenylpropanoids and polyketides	Flavonoids	Flavonoid glycosides
Glyma.01G228700	M565T426_1_POS	-0.50299	0.0333628	Naringenin-chalcone synthase / Flavonone synthase	dTDP-alpha-D-glucose
Glyma.01G228700	M578T517_POS	-0.563229	0.0149377	Naringenin-chalcone synthase / Flavonone synthase	C37-phenolphthiocerol A
Glyma.01G228700	M579T478_NEG	-0.527213	0.0245573	Naringenin-chalcone synthase / Flavonone synthase	Naringin	Phenylpropanoids and polyketides	Flavonoids	Flavonoid glycosides
Glyma.01G228700	M581T514_NEG	0.520567	0.0267677	Naringenin-chalcone synthase / Flavonone synthase	2'-Norberbamunine	Organoheterocyclic compounds	Isoquinolines and derivatives	Benzylisoquinolines
Glyma.01G228700	M583T604_NEG	-0.500863	0.034239	Naringenin-chalcone synthase / Flavonone synthase	Magnesium protoporphyrin	Organoheterocyclic compounds	Tetrapyrroles and derivatives	Metallotetrapyrroles
Glyma.01G228700	M585T556_NEG	-0.51178	0.029924	Naringenin-chalcone synthase / Flavonone synthase	Baccatin III	Lipids and lipid-like molecules	Prenol lipids	Diterpenoids
Glyma.01G228700	M587T636_POS	-0.675962	0.00207363	Naringenin-chalcone synthase / Flavonone synthase	(3Z)-Phycocyanobilin	Organoheterocyclic compounds	Tetrapyrroles and derivatives	Bilirubins
Glyma.01G228700	M593T476_2_POS	-0.501312	0.0340528	Naringenin-chalcone synthase / Flavonone synthase	2''-O-alpha-L-Rhamnosyl-6-C-fucosyl-3'-methoxyluteoiin	Phenylpropanoids and polyketides	Flavonoids	Flavonoid glycosides
Glyma.01G228700	M608T322_NEG	0.583543	0.0110125	Naringenin-chalcone synthase / Flavonone synthase	Malvidin 3-glucoside-4-vinylphenol	Phenylpropanoids and polyketides	Flavonoids	Flavonoid glycosides
Glyma.01G228700	M616T622_POS	-0.640014	0.00422609	Naringenin-chalcone synthase / Flavonone synthase	6'''-Deamino-6'''-hydroxyneomycin C	Organic oxygen compounds	Organooxygen compounds	Carbohydrates and carbohydrate conjugates
Glyma.01G228700	M625T491_POS	-0.618631	0.00620139	Naringenin-chalcone synthase / Flavonone synthase	Buntanbismine	Organoheterocyclic compounds	Quinolines and derivatives	Benzoquinolines
Glyma.01G228700	M629T450_NEG	0.617254	0.00635062	Naringenin-chalcone synthase / Flavonone synthase	Prebetanin	Alkaloids and derivatives	Betalains	Betacyanins and derivatives
Glyma.01G228700	M629T566_NEG	-0.503169	0.03329	Naringenin-chalcone synthase / Flavonone synthase	7(1)-Hydroxychlorophyllide a	Organoheterocyclic compounds	Tetrapyrroles and derivatives	Chlorins
Glyma.01G228700	M640T413_POS	0.657047	0.00305021	Naringenin-chalcone synthase / Flavonone synthase	Demethyl-desacetyl-rifamycin S	Phenylpropanoids and polyketides	Macrolactams	NA
Glyma.01G228700	M650T557_NEG	-0.597715	0.00879997	Naringenin-chalcone synthase / Flavonone synthase	Triiodothyronine
Glyma.01G228700	M652T526_NEG	-0.511112	0.0301753	Naringenin-chalcone synthase / Flavonone synthase	Rifamycin W-hemiacetal	Phenylpropanoids and polyketides	Macrolactams	NA
Glyma.01G228700	M655T405_NEG	0.568883	0.0137484	Naringenin-chalcone synthase / Flavonone synthase	Patuletin 3-gentiobioside	Phenylpropanoids and polyketides	Flavonoids	Flavonoid glycosides
Glyma.01G228700	M669T444_NEG	-0.536244	0.0217852	Naringenin-chalcone synthase / Flavonone synthase	Citbismine B	Organoheterocyclic compounds	Quinolines and derivatives	Benzoquinolines
Glyma.01G228700	M675T544_1_POS	-0.502668	0.0334944	Naringenin-chalcone synthase / Flavonone synthase	triferuloyl spermidine
Glyma.01G228700	M680T635_NEG	-0.57286	0.0129578	Naringenin-chalcone synthase / Flavonone synthase	Neoacrimarine A	Organoheterocyclic compounds	Quinolines and derivatives	Benzoquinolines
Glyma.01G228700	M696T596_NEG	0.505351	0.032411	Naringenin-chalcone synthase / Flavonone synthase	Rifamycin	Phenylpropanoids and polyketides	Macrolactams	NA
Glyma.01G228700	M711T556_NEG	0.559915	0.015672	Naringenin-chalcone synthase / Flavonone synthase	lipid X (E. coli)
Glyma.01G228700	M726T363_1_POS	-0.596627	0.00895606	Naringenin-chalcone synthase / Flavonone synthase	molybdopterin adenine dinucleotide
Glyma.01G228700	M754T503_NEG	-0.551498	0.0176656	Naringenin-chalcone synthase / Flavonone synthase	Rifamycin B	Phenylpropanoids and polyketides	Macrolactams	NA
Glyma.01G228700	M781T537_NEG	-0.564808	0.0145977	Naringenin-chalcone synthase / Flavonone synthase	Ansamitocinoside P-3	Lipids and lipid-like molecules	Fatty Acyls	Fatty acyl glycosides
Glyma.01G228700	M803T455_NEG	-0.580618	0.0115203	Naringenin-chalcone synthase / Flavonone synthase	Lactucain C	Organic acids and derivatives	Carboxylic acids and derivatives	Tetracarboxylic acids and derivatives
Glyma.01G228700	M850T507_POS	-0.658457	0.00296635	Naringenin-chalcone synthase / Flavonone synthase	3-methoxy-4-hydroxy-5-all-trans-decaprenylbenzoate
Glyma.01G228700	M852T507_POS	-0.54813	0.0185174	Naringenin-chalcone synthase / Flavonone synthase	3-demethylubiquinol-10
Glyma.01G228700	M867T700_NEG	0.502764	0.0334552	Naringenin-chalcone synthase / Flavonone synthase	Collettiside III	Lipids and lipid-like molecules	Steroids and steroid derivatives	Steroidal glycosides
Glyma.01G228700	M86T68_POS	0.539201	0.0209329	Naringenin-chalcone synthase / Flavonone synthase	2-Pyrrolidone	Organoheterocyclic compounds	Pyrrolidines	Pyrrolidones
Glyma.01G228700	M90T68_POS	0.636738	0.00448993	Naringenin-chalcone synthase / Flavonone synthase	beta-Alanine	Organic acids and derivatives	Carboxylic acids and derivatives	Amino acids, peptides, and analogues
Glyma.01G228700	M919T531_POS	-0.574285	0.0126835	Naringenin-chalcone synthase / Flavonone synthase	Kaempferol 3-sophorotrioside-7-rhamnoside	Phenylpropanoids and polyketides	Flavonoids	Flavonoid glycosides
Glyma.01G228700	M939T704_NEG	0.549454	0.0181788	Naringenin-chalcone synthase / Flavonone synthase	3-Rha(1-2)Gal(1-2)GluA-Soyasaponenol E	Lipids and lipid-like molecules	Prenol lipids	Terpene glycosides
Glyma.01G228700	M951T406_5_POS	-0.503424	0.0331864	Naringenin-chalcone synthase / Flavonone synthase	Quercetin 3-(2'''-(E)-caffeylsophoroside]-7-glucoside	Phenylpropanoids and polyketides	Flavonoids	Flavonoid glycosides
Glyma.01G228700	M978T336_7_POS	-0.613022	0.00682751	Naringenin-chalcone synthase / Flavonone synthase	Portisin B
Glyma.02G130400	M101T74_NEG	-0.613557	0.00676568	Naringenin-chalcone synthase / Flavonone synthase	2-Oxobutanoate	Organic acids and derivatives	Keto acids and derivatives	Short-chain keto acids and derivatives
Glyma.02G130400	M102T71_POS	0.786575	0.000108048	Naringenin-chalcone synthase / Flavonone synthase	1-Aminocyclopropane-1-carboxylate	Organic acids and derivatives	Carboxylic acids and derivatives	Amino acids, peptides, and analogues
Glyma.02G130400	M104T65_NEG	0.927986	2.89659e-08	Naringenin-chalcone synthase / Flavonone synthase	Serine	Organic acids and derivatives	Carboxylic acids and derivatives	Amino acids, peptides, and analogues
Glyma.02G130400	M106T70_POS	0.905185	2.43053e-07	Naringenin-chalcone synthase / Flavonone synthase	L-Serine	Organic acids and derivatives	Carboxylic acids and derivatives	Amino acids, peptides, and analogues
Glyma.02G130400	M113T68_NEG	0.723075	0.000697099	Naringenin-chalcone synthase / Flavonone synthase	2-Hydroxy-2,4-pentadienoate	Lipids and lipid-like molecules	Fatty Acyls	Fatty acids and conjugates
Glyma.02G130400	M115T75_NEG	-0.544838	0.0193808	Naringenin-chalcone synthase / Flavonone synthase	Maleic acid	Organic acids and derivatives	Carboxylic acids and derivatives	Dicarboxylic acids and derivatives
Glyma.02G130400	M118T66_NEG	0.554018	0.0170489	Naringenin-chalcone synthase / Flavonone synthase	L-Allothreonine	Organic acids and derivatives	Carboxylic acids and derivatives	Amino acids, peptides, and analogues
Glyma.02G130400	M118T73_POS	0.623546	0.00569179	Naringenin-chalcone synthase / Flavonone synthase	VALINE	Organic acids and derivatives	Carboxylic acids and derivatives	Amino acids, peptides, and analogues
Glyma.02G130400	M119T67_NEG	-0.563246	0.014934	Naringenin-chalcone synthase / Flavonone synthase	3,4-Dihydroxybutanoic acid	Organic acids and derivatives	Hydroxy acids and derivatives	Beta hydroxy acids and derivatives
Glyma.02G130400	M125T71_POS	0.597436	0.0088399	Naringenin-chalcone synthase / Flavonone synthase	Methylimidazole acetaldehyde	Organoheterocyclic compounds	Azoles	Imidazoles
Glyma.02G130400	M130T68_POS	0.695448	0.00135331	Naringenin-chalcone synthase / Flavonone synthase	5-Oxoproline	Organic acids and derivatives	Carboxylic acids and derivatives	Amino acids, peptides, and analogues
Glyma.02G130400	M138T69_POS	0.58845	0.0102011	Naringenin-chalcone synthase / Flavonone synthase	N-methylnicotinate	Alkaloids and derivatives	NA	NA
Glyma.02G130400	M142T67_POS	0.686141	0.00166578	Naringenin-chalcone synthase / Flavonone synthase	carbamoyl phosphate
Glyma.02G130400	M147T69_POS	0.668861	0.00240435	Naringenin-chalcone synthase / Flavonone synthase	L-Glutamine	Organic acids and derivatives	Carboxylic acids and derivatives	Amino acids, peptides, and analogues
Glyma.02G130400	M150T929_NEG	0.580437	0.0115522	Naringenin-chalcone synthase / Flavonone synthase	2-Benzothiazolinone	Organoheterocyclic compounds	Benzothiazoles
Glyma.02G130400	M157T70_NEG	0.732536	0.000545607	Naringenin-chalcone synthase / Flavonone synthase	(R)(-)-Allantoin	Organoheterocyclic compounds	Azolidines	Imidazolidines
Glyma.02G130400	M158T107_NEG	0.640037	0.00422431	Naringenin-chalcone synthase / Flavonone synthase	5-Acetamidopentanoate	Lipids and lipid-like molecules	Fatty Acyls	Fatty acids and conjugates
Glyma.02G130400	M159T71_POS	0.546602	0.0189145	Naringenin-chalcone synthase / Flavonone synthase	Allantoin	Organoheterocyclic compounds	Azoles	Imidazoles
Glyma.02G130400	M166T660_POS	0.511997	0.0298429	Naringenin-chalcone synthase / Flavonone synthase	Hordenine	Benzenoids	Benzene and substituted derivatives	Phenethylamines
Glyma.02G130400	M172T298_POS	0.609465	0.00725034	Naringenin-chalcone synthase / Flavonone synthase	N-Butanoylhomoserine lactone	Organic acids and derivatives	Carboxylic acids and derivatives	Amino acids, peptides, and analogues
Glyma.02G130400	M172T390_NEG	0.518763	0.0273935	Naringenin-chalcone synthase / Flavonone synthase	5-Guanidino-2-oxopentanoate	Organic acids and derivatives	Keto acids and derivatives	Short-chain keto acids and derivatives
Glyma.02G130400	M172T69_NEG	-0.529169	0.0239346	Naringenin-chalcone synthase / Flavonone synthase	(2S,5S)-trans-Carboxymethylproline	Organic acids and derivatives	Carboxylic acids and derivatives	Amino acids, peptides, and analogues
Glyma.02G130400	M173T421_NEG	0.679102	0.00193988	Naringenin-chalcone synthase / Flavonone synthase	Suberic acid	Lipids and lipid-like molecules	Fatty Acyls	Fatty acids and conjugates
Glyma.02G130400	M175T68_NEG	0.528459	0.0241593	Naringenin-chalcone synthase / Flavonone synthase	Allantoate	Organic acids and derivatives	Carboxylic acids and derivatives	Amino acids, peptides, and analogues
Glyma.02G130400	M182T152_POS	0.58164	0.0113407	Naringenin-chalcone synthase / Flavonone synthase	L-Phosphinothricin	Organic acids and derivatives	Carboxylic acids and derivatives	Amino acids, peptides, and analogues
Glyma.02G130400	M184T463_POS	0.58244	0.0112018	Naringenin-chalcone synthase / Flavonone synthase	Acetylpseudotropine	Alkaloids and derivatives	Tropane alkaloids	NA
Glyma.02G130400	M185T66_POS	0.703952	0.00111193	Naringenin-chalcone synthase / Flavonone synthase	5-Hydroxyisourate	Organoheterocyclic compounds	Imidazopyrimidines	Purines and purine derivatives
Glyma.02G130400	M186T66_POS	0.800601	6.57835e-05	Naringenin-chalcone synthase / Flavonone synthase	2-Amino-3-carboxymuconate semialdehyde	Organic acids and derivatives	Carboxylic acids and derivatives	Amino acids, peptides, and analogues
Glyma.02G130400	M187T69_POS	0.641115	0.00414032	Naringenin-chalcone synthase / Flavonone synthase	3-maleylpyruvate
Glyma.02G130400	M201T74_POS	0.655142	0.00316656	Naringenin-chalcone synthase / Flavonone synthase	D-erythrose 4-phosphate
Glyma.02G130400	M209T98_POS	0.537262	0.0214887	Naringenin-chalcone synthase / Flavonone synthase	L-Kynurenine	Organic oxygen compounds	Organooxygen compounds	Carbonyl compounds
Glyma.02G130400	M215T67_NEG	-0.593321	0.00944375	Naringenin-chalcone synthase / Flavonone synthase	2-C-Methyl-D-erythritol 4-phosphate	Organic acids and derivatives	Organic phosphoric acids and derivatives	Phosphate esters
Glyma.02G130400	M216T376_NEG	0.759514	0.000255916	Naringenin-chalcone synthase / Flavonone synthase	N-Acetyl-L-citrulline	Organic acids and derivatives	Carboxylic acids and derivatives	Amino acids, peptides, and analogues
Glyma.02G130400	M217T97_POS	0.521587	0.0264188	Naringenin-chalcone synthase / Flavonone synthase	gamma-Glutamyl-gamma-aminobutyraldehyde	Organic acids and derivatives	Carboxylic acids and derivatives	Amino acids, peptides, and analogues
Glyma.02G130400	M223T723_POS	0.533688	0.0225435	Naringenin-chalcone synthase / Flavonone synthase	Coniferyl acetate	Benzenoids	Phenols	Methoxyphenols
Glyma.02G130400	M237T724_POS	0.612231	0.00691977	Naringenin-chalcone synthase / Flavonone synthase	Aubergenone	Lipids and lipid-like molecules	Prenol lipids	Sesquiterpenoids
Glyma.02G130400	M238T70_POS	0.709871	0.000966004	Naringenin-chalcone synthase / Flavonone synthase	S-succinylcysteine	Organic acids and derivatives	Carboxylic acids and derivatives	Amino acids, peptides, and analogues
Glyma.02G130400	M267T68_NEG	-0.505686	0.0322774	Naringenin-chalcone synthase / Flavonone synthase	2-O-(alpha-D-Mannosyl)-D-glycerate	Lipids and lipid-like molecules	Fatty Acyls	Fatty acyl glycosides
Glyma.02G130400	M269T389_NEG	0.532813	0.0228077	Naringenin-chalcone synthase / Flavonone synthase	4',6,7-Trihydroxyisoflavone	Phenylpropanoids and polyketides	Isoflavonoids	Isoflav-2-enes
Glyma.02G130400	M279T839_POS	0.576825	0.0122063	Naringenin-chalcone synthase / Flavonone synthase	Di-n-butyl phthalate	Benzenoids	Benzene and substituted derivatives	Benzoic acids and derivatives
Glyma.02G130400	M288T742_POS	0.775502	0.00015593	Naringenin-chalcone synthase / Flavonone synthase	Lauryl diethanolamide	Lipids and lipid-like molecules	Fatty Acyls	Fatty amides
Glyma.02G130400	M298T830_POS	0.70615	0.00105575	Naringenin-chalcone synthase / Flavonone synthase	N7-methylguanosine
Glyma.02G130400	M303T888_POS	0.88345	1.18054e-06	Naringenin-chalcone synthase / Flavonone synthase	(3R,4R)-3-(6-hydroxy-1,3-benzodioxol-5-yl)-3,4-dihydro-2H-chromene-4,7-diol
Glyma.02G130400	M307T108_NEG	0.602454	0.00814576	Naringenin-chalcone synthase / Flavonone synthase	(R)-5-Diphosphomevalonate	Organic oxygen compounds	Organic oxoanionic compounds	Organic pyrophosphates
Glyma.02G130400	M309T463_NEG	0.68669	0.00164584	Naringenin-chalcone synthase / Flavonone synthase	Sinapine	Phenylpropanoids and polyketides	Cinnamic acids and derivatives	Hydroxycinnamic acids and derivatives
Glyma.02G130400	M315T416_POS	0.587009	0.0104343	Naringenin-chalcone synthase / Flavonone synthase	6-O-Acetylarbutin	Organic oxygen compounds	Organooxygen compounds	Carbohydrates and carbohydrate conjugates
Glyma.02G130400	M322T702_NEG	0.525011	0.0252731	Naringenin-chalcone synthase / Flavonone synthase	(-)-Jasmonoyl-L-isoleucine	Organic acids and derivatives	Carboxylic acids and derivatives	Amino acids, peptides, and analogues
Glyma.02G130400	M323T391_NEG	0.610629	0.00710975	Naringenin-chalcone synthase / Flavonone synthase	5-enolpyruvoyl-shikimate 3-phosphate
Glyma.02G130400	M336T913_POS	0.895121	5.2725e-07	Naringenin-chalcone synthase / Flavonone synthase	N4-(beta-N-acetyl-D-glucosaminyl)-L-asparagine
Glyma.02G130400	M338T700_POS	0.561762	0.0152594	Naringenin-chalcone synthase / Flavonone synthase	5-Hydroxymethyldeoxycytidylate	Nucleosides, nucleotides, and analogues	Pyrimidine nucleotides	Pyrimidine deoxyribonucleotides
Glyma.02G130400	M347T786_POS	0.580755	0.011496	Naringenin-chalcone synthase / Flavonone synthase	Corticosterone	Lipids and lipid-like molecules	Steroids and steroid derivatives	Hydroxysteroids
Glyma.02G130400	M352T713_NEG	0.511171	0.0301532	Naringenin-chalcone synthase / Flavonone synthase	2,5-diamino-6-(5-phospho-D-ribosylamino)pyrimidin-4(3H)-one
Glyma.02G130400	M359T413_POS	0.536036	0.0218461	Naringenin-chalcone synthase / Flavonone synthase	Versiconal	Benzenoids	Anthracenes	Anthraquinones
Glyma.02G130400	M363T910_POS	0.906901	2.11171e-07	Naringenin-chalcone synthase / Flavonone synthase	3,6,9,12-Tetraoxatetracosan-1-ol	Organic oxygen compounds	Organooxygen compounds	Ethers
Glyma.02G130400	M363T922_NEG	0.811824	4.29846e-05	Naringenin-chalcone synthase / Flavonone synthase	XMP
Glyma.02G130400	M367T509_NEG	0.592838	0.00951681	Naringenin-chalcone synthase / Flavonone synthase	4-O-Methylxanthohumol	Phenylpropanoids and polyketides	Linear 1,3-diarylpropanoids	Chalcones and dihydrochalcones
Glyma.02G130400	M374T151_POS	0.580018	0.0116265	Naringenin-chalcone synthase / Flavonone synthase	N-Acetylmuramic acid 6-phosphate	Organic oxygen compounds	Organooxygen compounds	Carbohydrates and carbohydrate conjugates
Glyma.02G130400	M383T829_POS	0.650333	0.00347658	Naringenin-chalcone synthase / Flavonone synthase	Histamine-trifluoromethyltoluide	Benzenoids	Benzene and substituted derivatives	Trifluoromethylbenzenes
Glyma.02G130400	M391T699_NEG	0.588376	0.0102129	Naringenin-chalcone synthase / Flavonone synthase	5-O-Demethylnobiletin
Glyma.02G130400	M399T68_POS	0.550221	0.0179849	Naringenin-chalcone synthase / Flavonone synthase	S-Adenosyl-L-methionine	Nucleosides, nucleotides, and analogues	5'-deoxyribonucleosides	5'-deoxy-5'-thionucleosides
Glyma.02G130400	M412T507_POS	0.520374	0.0268341	Naringenin-chalcone synthase / Flavonone synthase	dADP
Glyma.02G130400	M417T438_POS	0.587831	0.0103007	Naringenin-chalcone synthase / Flavonone synthase	Daidzein-8-C-glucoside	Phenylpropanoids and polyketides	Isoflavonoids	Isoflavonoid C-glycosides
Glyma.02G130400	M430T906_POS	0.888872	8.20828e-07	Naringenin-chalcone synthase / Flavonone synthase	15alpha-Hydroxysolasodine	Lipids and lipid-like molecules	Steroids and steroid derivatives	Steroidal alkaloids
Glyma.02G130400	M433T374_POS	0.592721	0.00953452	Naringenin-chalcone synthase / Flavonone synthase	Apigenin-7-O-glucoside	Phenylpropanoids and polyketides	Flavonoids	Flavonoid glycosides
Glyma.02G130400	M435T443_POS	0.663574	0.00267779	Naringenin-chalcone synthase / Flavonone synthase	Reynoutrin	Phenylpropanoids and polyketides	Flavonoids	Flavonoid glycosides
Glyma.02G130400	M461T439_NEG	0.528046	0.0242904	Naringenin-chalcone synthase / Flavonone synthase	gamma-L-Glutamyl-S-(hercyn-2-yl)-L-cysteine S-oxide	Organic acids and derivatives	Carboxylic acids and derivatives	Amino acids, peptides, and analogues
Glyma.02G130400	M468T552_POS	0.535172	0.0221007	Naringenin-chalcone synthase / Flavonone synthase	Tobramycin	Organic oxygen compounds	Organooxygen compounds	Carbohydrates and carbohydrate conjugates
Glyma.02G130400	M471T243_NEG	0.894422	5.54758e-07	Naringenin-chalcone synthase / Flavonone synthase	Hassmarin	Phenylpropanoids and polyketides	Coumarins and derivatives	Pyranocoumarins
Glyma.02G130400	M536T409_NEG	0.518238	0.0275778	Naringenin-chalcone synthase / Flavonone synthase	Dihydrolipoyl-AMP	Nucleosides, nucleotides, and analogues	Purine nucleotides	Purine ribonucleotides
Glyma.02G130400	M613T608_NEG	0.599977	0.00848273	Naringenin-chalcone synthase / Flavonone synthase	Neomycin B	Organic oxygen compounds	Organooxygen compounds	Carbohydrates and carbohydrate conjugates
Glyma.02G130400	M629T490_NEG	0.572824	0.0129648	Naringenin-chalcone synthase / Flavonone synthase	GDP-4-acetamido-4,6-dideoxy-alpha-D-mannose	Nucleosides, nucleotides, and analogues	Purine nucleotides	Purine nucleotide sugars
Glyma.02G130400	M640T413_POS	0.786103	0.000109796	Naringenin-chalcone synthase / Flavonone synthase	Demethyl-desacetyl-rifamycin S	Phenylpropanoids and polyketides	Macrolactams	NA
Glyma.02G130400	M74T103_POS	0.670689	0.00231533	Naringenin-chalcone synthase / Flavonone synthase	N,N-Dimethylformamide	Organic acids and derivatives	Carboxylic acids and derivatives	Carboxylic acid derivatives
Glyma.02G130400	M799T417_NEG	-0.520634	0.0267446	Naringenin-chalcone synthase / Flavonone synthase	6'''-O-Sinapoylsaponarin	Phenylpropanoids and polyketides	Flavonoids	Flavonoid glycosides
Glyma.02G130400	M87T107_POS	0.551056	0.0177755	Naringenin-chalcone synthase / Flavonone synthase	Diacetyl	Organic oxygen compounds	Organooxygen compounds	Carbonyl compounds
Glyma.02G130400	M88T67_NEG	0.545262	0.019268	Naringenin-chalcone synthase / Flavonone synthase	L-Alanine	Organic acids and derivatives	Carboxylic acids and derivatives	Amino acids, peptides, and analogues
Glyma.02G130400	M90T68_POS	0.930314	2.24382e-08	Naringenin-chalcone synthase / Flavonone synthase	beta-Alanine	Organic acids and derivatives	Carboxylic acids and derivatives	Amino acids, peptides, and analogues
Glyma.02G130400	M99T75_POS	-0.513349	0.0293404	Naringenin-chalcone synthase / Flavonone synthase	Ortophosphate	Homogeneous non-metal compounds	Non-metal oxoanionic compounds	Non-metal phosphates
Glyma.05G153200	M102T71_POS	0.597962	0.00876495	Naringenin-chalcone synthase / Flavonone synthase	1-Aminocyclopropane-1-carboxylate	Organic acids and derivatives	Carboxylic acids and derivatives	Amino acids, peptides, and analogues
Glyma.05G153200	M104T65_NEG	0.581341	0.011393	Naringenin-chalcone synthase / Flavonone synthase	Serine	Organic acids and derivatives	Carboxylic acids and derivatives	Amino acids, peptides, and analogues
Glyma.05G153200	M106T70_POS	0.642784	0.00401304	Naringenin-chalcone synthase / Flavonone synthase	L-Serine	Organic acids and derivatives	Carboxylic acids and derivatives	Amino acids, peptides, and analogues
Glyma.05G153200	M110T938_POS	0.505617	0.0323048	Naringenin-chalcone synthase / Flavonone synthase	(S)-2-chloropropanoate
Glyma.05G153200	M130T68_POS	0.508044	0.0313504	Naringenin-chalcone synthase / Flavonone synthase	5-Oxoproline	Organic acids and derivatives	Carboxylic acids and derivatives	Amino acids, peptides, and analogues
Glyma.05G153200	M142T67_POS	0.581459	0.0113724	Naringenin-chalcone synthase / Flavonone synthase	carbamoyl phosphate
Glyma.05G153200	M147T69_POS	0.568179	0.0138923	Naringenin-chalcone synthase / Flavonone synthase	L-Glutamine	Organic acids and derivatives	Carboxylic acids and derivatives	Amino acids, peptides, and analogues
Glyma.05G153200	M157T938_POS	0.610785	0.00709097	Naringenin-chalcone synthase / Flavonone synthase	2-Phosphoglycolate	Organic acids and derivatives	Organic phosphoric acids and derivatives	Phosphate esters
Glyma.05G153200	M185T66_POS	0.616621	0.0064202	Naringenin-chalcone synthase / Flavonone synthase	5-Hydroxyisourate	Organoheterocyclic compounds	Imidazopyrimidines	Purines and purine derivatives
Glyma.05G153200	M186T66_POS	0.586735	0.0104791	Naringenin-chalcone synthase / Flavonone synthase	2-Amino-3-carboxymuconate semialdehyde	Organic acids and derivatives	Carboxylic acids and derivatives	Amino acids, peptides, and analogues
Glyma.05G153200	M187T69_POS	0.640675	0.00417442	Naringenin-chalcone synthase / Flavonone synthase	3-maleylpyruvate
Glyma.05G153200	M191T595_POS	0.557844	0.016145	Naringenin-chalcone synthase / Flavonone synthase	beta-Damascenone	Organic oxygen compounds	Organooxygen compounds	Carbonyl compounds
Glyma.05G153200	M201T74_POS	0.572376	0.0130522	Naringenin-chalcone synthase / Flavonone synthase	D-erythrose 4-phosphate
Glyma.05G153200	M209T604_POS	0.544627	0.0194374	Naringenin-chalcone synthase / Flavonone synthase	alpha-Asarone	Benzenoids	Phenol ethers	Anisoles
Glyma.05G153200	M235T732_POS	0.517572	0.0278129	Naringenin-chalcone synthase / Flavonone synthase	Germacrene A acid	Lipids and lipid-like molecules	Prenol lipids	Sesquiterpenoids
Glyma.05G153200	M237T724_POS	0.608563	0.00736091	Naringenin-chalcone synthase / Flavonone synthase	Aubergenone	Lipids and lipid-like molecules	Prenol lipids	Sesquiterpenoids
Glyma.05G153200	M238T70_POS	0.503151	0.0332974	Naringenin-chalcone synthase / Flavonone synthase	S-succinylcysteine	Organic acids and derivatives	Carboxylic acids and derivatives	Amino acids, peptides, and analogues
Glyma.05G153200	M273T639_POS	0.654129	0.0032299	Naringenin-chalcone synthase / Flavonone synthase	Naringenin chalcone	Phenylpropanoids and polyketides	Linear 1,3-diarylpropanoids	Chalcones and dihydrochalcones
Glyma.05G153200	M276T512_POS	0.506979	0.0317665	Naringenin-chalcone synthase / Flavonone synthase	Physostigmine	Organoheterocyclic compounds	Indoles and derivatives	Pyrroloindoles
Glyma.05G153200	M279T781_POS	0.543737	0.0196766	Naringenin-chalcone synthase / Flavonone synthase	?-linolenic acid	Lipids and lipid-like molecules	Fatty Acyls	Lineolic acids and derivatives
Glyma.05G153200	M288T742_POS	0.571288	0.0132659	Naringenin-chalcone synthase / Flavonone synthase	Lauryl diethanolamide	Lipids and lipid-like molecules	Fatty Acyls	Fatty amides
Glyma.05G153200	M298T830_POS	0.533605	0.0225685	Naringenin-chalcone synthase / Flavonone synthase	N7-methylguanosine
Glyma.05G153200	M300T287_POS	0.582939	0.0111159	Naringenin-chalcone synthase / Flavonone synthase	(R)-4-phosphopantothenate
Glyma.05G153200	M302T722_POS	0.564337	0.0146985	Naringenin-chalcone synthase / Flavonone synthase	CIF 3
Glyma.05G153200	M303T888_POS	0.655206	0.00316261	Naringenin-chalcone synthase / Flavonone synthase	(3R,4R)-3-(6-hydroxy-1,3-benzodioxol-5-yl)-3,4-dihydro-2H-chromene-4,7-diol
Glyma.05G153200	M305T814_POS	0.516707	0.0281204	Naringenin-chalcone synthase / Flavonone synthase	3-Acetoxy-9-heptadecene-4,6-diyn-8-ol.	Lipids and lipid-like molecules	Fatty Acyls	Fatty alcohol esters
Glyma.05G153200	M336T913_POS	0.679143	0.00193817	Naringenin-chalcone synthase / Flavonone synthase	N4-(beta-N-acetyl-D-glucosaminyl)-L-asparagine
Glyma.05G153200	M338T700_POS	0.670998	0.00230055	Naringenin-chalcone synthase / Flavonone synthase	5-Hydroxymethyldeoxycytidylate	Nucleosides, nucleotides, and analogues	Pyrimidine nucleotides	Pyrimidine deoxyribonucleotides
Glyma.05G153200	M347T786_POS	0.729312	0.000593775	Naringenin-chalcone synthase / Flavonone synthase	Corticosterone	Lipids and lipid-like molecules	Steroids and steroid derivatives	Hydroxysteroids
Glyma.05G153200	M349T687_POS	0.505501	0.032351	Naringenin-chalcone synthase / Flavonone synthase	Gibberellin A111	Lipids and lipid-like molecules	Prenol lipids	Diterpenoids
Glyma.05G153200	M363T910_POS	0.683016	0.00178322	Naringenin-chalcone synthase / Flavonone synthase	3,6,9,12-Tetraoxatetracosan-1-ol	Organic oxygen compounds	Organooxygen compounds	Ethers
Glyma.05G153200	M363T922_NEG	0.772242	0.00017305	Naringenin-chalcone synthase / Flavonone synthase	XMP
Glyma.05G153200	M391T699_NEG	0.577886	0.0120111	Naringenin-chalcone synthase / Flavonone synthase	5-O-Demethylnobiletin
Glyma.05G153200	M430T906_POS	0.697082	0.00130383	Naringenin-chalcone synthase / Flavonone synthase	15alpha-Hydroxysolasodine	Lipids and lipid-like molecules	Steroids and steroid derivatives	Steroidal alkaloids
Glyma.05G153200	M433T374_POS	0.520206	0.0268921	Naringenin-chalcone synthase / Flavonone synthase	Apigenin-7-O-glucoside	Phenylpropanoids and polyketides	Flavonoids	Flavonoid glycosides
Glyma.05G153200	M471T243_NEG	0.701585	0.00117519	Naringenin-chalcone synthase / Flavonone synthase	Hassmarin	Phenylpropanoids and polyketides	Coumarins and derivatives	Pyranocoumarins
Glyma.05G153200	M578T517_POS	-0.500499	0.0343909	Naringenin-chalcone synthase / Flavonone synthase	C37-phenolphthiocerol A
Glyma.05G153200	M629T490_NEG	0.592262	0.00960445	Naringenin-chalcone synthase / Flavonone synthase	GDP-4-acetamido-4,6-dideoxy-alpha-D-mannose	Nucleosides, nucleotides, and analogues	Purine nucleotides	Purine nucleotide sugars
Glyma.05G153200	M640T413_POS	0.648048	0.00363232	Naringenin-chalcone synthase / Flavonone synthase	Demethyl-desacetyl-rifamycin S	Phenylpropanoids and polyketides	Macrolactams	NA
Glyma.05G153200	M74T103_POS	0.551319	0.0177103	Naringenin-chalcone synthase / Flavonone synthase	N,N-Dimethylformamide	Organic acids and derivatives	Carboxylic acids and derivatives	Carboxylic acid derivatives
Glyma.05G153200	M90T68_POS	0.531722	0.0231405	Naringenin-chalcone synthase / Flavonone synthase	beta-Alanine	Organic acids and derivatives	Carboxylic acids and derivatives	Amino acids, peptides, and analogues
Glyma.08G109200	M101T74_NEG	-0.557319	0.0162668	Naringenin-chalcone synthase / Flavonone synthase	2-Oxobutanoate	Organic acids and derivatives	Keto acids and derivatives	Short-chain keto acids and derivatives
Glyma.08G109200	M101T95_NEG	-0.601772	0.00823749	Naringenin-chalcone synthase / Flavonone synthase	2-Ketobutyric acid	Organic acids and derivatives	Keto acids and derivatives	Short-chain keto acids and derivatives
Glyma.08G109200	M102T71_POS	0.746531	0.000372644	Naringenin-chalcone synthase / Flavonone synthase	1-Aminocyclopropane-1-carboxylate	Organic acids and derivatives	Carboxylic acids and derivatives	Amino acids, peptides, and analogues
Glyma.08G109200	M104T65_NEG	0.920167	6.44356e-08	Naringenin-chalcone synthase / Flavonone synthase	Serine	Organic acids and derivatives	Carboxylic acids and derivatives	Amino acids, peptides, and analogues
Glyma.08G109200	M106T70_POS	0.954661	7.78502e-10	Naringenin-chalcone synthase / Flavonone synthase	L-Serine	Organic acids and derivatives	Carboxylic acids and derivatives	Amino acids, peptides, and analogues
Glyma.08G109200	M113T68_NEG	0.687737	0.00160833	Naringenin-chalcone synthase / Flavonone synthase	2-Hydroxy-2,4-pentadienoate	Lipids and lipid-like molecules	Fatty Acyls	Fatty acids and conjugates
Glyma.08G109200	M115T75_NEG	-0.625875	0.00546252	Naringenin-chalcone synthase / Flavonone synthase	Maleic acid	Organic acids and derivatives	Carboxylic acids and derivatives	Dicarboxylic acids and derivatives
Glyma.08G109200	M118T73_POS	0.618513	0.00621406	Naringenin-chalcone synthase / Flavonone synthase	VALINE	Organic acids and derivatives	Carboxylic acids and derivatives	Amino acids, peptides, and analogues
Glyma.08G109200	M119T67_NEG	-0.586347	0.0105428	Naringenin-chalcone synthase / Flavonone synthase	3,4-Dihydroxybutanoic acid	Organic acids and derivatives	Hydroxy acids and derivatives	Beta hydroxy acids and derivatives
Glyma.08G109200	M125T71_POS	0.554316	0.0169771	Naringenin-chalcone synthase / Flavonone synthase	Methylimidazole acetaldehyde	Organoheterocyclic compounds	Azoles	Imidazoles
Glyma.08G109200	M130T68_POS	0.686073	0.00166826	Naringenin-chalcone synthase / Flavonone synthase	5-Oxoproline	Organic acids and derivatives	Carboxylic acids and derivatives	Amino acids, peptides, and analogues
Glyma.08G109200	M138T69_POS	0.514885	0.0287775	Naringenin-chalcone synthase / Flavonone synthase	N-methylnicotinate	Alkaloids and derivatives	NA	NA
Glyma.08G109200	M142T67_POS	0.576675	0.012234	Naringenin-chalcone synthase / Flavonone synthase	carbamoyl phosphate
Glyma.08G109200	M147T69_POS	0.677664	0.00200022	Naringenin-chalcone synthase / Flavonone synthase	L-Glutamine	Organic acids and derivatives	Carboxylic acids and derivatives	Amino acids, peptides, and analogues
Glyma.08G109200	M150T929_NEG	0.557634	0.0161936	Naringenin-chalcone synthase / Flavonone synthase	2-Benzothiazolinone	Organoheterocyclic compounds	Benzothiazoles
Glyma.08G109200	M157T70_NEG	0.779093	0.000138752	Naringenin-chalcone synthase / Flavonone synthase	(R)(-)-Allantoin	Organoheterocyclic compounds	Azolidines	Imidazolidines
Glyma.08G109200	M158T107_NEG	0.663212	0.00269744	Naringenin-chalcone synthase / Flavonone synthase	5-Acetamidopentanoate	Lipids and lipid-like molecules	Fatty Acyls	Fatty acids and conjugates
Glyma.08G109200	M159T71_POS	0.629767	0.00509606	Naringenin-chalcone synthase / Flavonone synthase	Allantoin	Organoheterocyclic compounds	Azoles	Imidazoles
Glyma.08G109200	M171T390_NEG	0.52564	0.0250671	Naringenin-chalcone synthase / Flavonone synthase	1,4-Cyclohexanedicarboxylic acid	Organic acids and derivatives	Carboxylic acids and derivatives	Dicarboxylic acids and derivatives
Glyma.08G109200	M172T298_POS	0.61327	0.00679879	Naringenin-chalcone synthase / Flavonone synthase	N-Butanoylhomoserine lactone	Organic acids and derivatives	Carboxylic acids and derivatives	Amino acids, peptides, and analogues
Glyma.08G109200	M172T390_NEG	0.536615	0.0216765	Naringenin-chalcone synthase / Flavonone synthase	5-Guanidino-2-oxopentanoate	Organic acids and derivatives	Keto acids and derivatives	Short-chain keto acids and derivatives
Glyma.08G109200	M173T421_NEG	0.636074	0.00454496	Naringenin-chalcone synthase / Flavonone synthase	Suberic acid	Lipids and lipid-like molecules	Fatty Acyls	Fatty acids and conjugates
Glyma.08G109200	M175T68_NEG	0.633705	0.00474603	Naringenin-chalcone synthase / Flavonone synthase	Allantoate	Organic acids and derivatives	Carboxylic acids and derivatives	Amino acids, peptides, and analogues
Glyma.08G109200	M185T66_POS	0.78018	0.00013388	Naringenin-chalcone synthase / Flavonone synthase	5-Hydroxyisourate	Organoheterocyclic compounds	Imidazopyrimidines	Purines and purine derivatives
Glyma.08G109200	M186T66_POS	0.856942	5.57535e-06	Naringenin-chalcone synthase / Flavonone synthase	2-Amino-3-carboxymuconate semialdehyde	Organic acids and derivatives	Carboxylic acids and derivatives	Amino acids, peptides, and analogues
Glyma.08G109200	M187T69_POS	0.597069	0.00889234	Naringenin-chalcone synthase / Flavonone synthase	3-maleylpyruvate
Glyma.08G109200	M201T74_POS	0.671218	0.00229009	Naringenin-chalcone synthase / Flavonone synthase	D-erythrose 4-phosphate
Glyma.08G109200	M215T194_POS	0.604974	0.00781424	Naringenin-chalcone synthase / Flavonone synthase	Dethiobiotin	Lipids and lipid-like molecules	Fatty Acyls	Fatty acids and conjugates
Glyma.08G109200	M215T67_NEG	-0.526108	0.0249143	Naringenin-chalcone synthase / Flavonone synthase	2-C-Methyl-D-erythritol 4-phosphate	Organic acids and derivatives	Organic phosphoric acids and derivatives	Phosphate esters
Glyma.08G109200	M216T376_NEG	0.637845	0.00439928	Naringenin-chalcone synthase / Flavonone synthase	N-Acetyl-L-citrulline	Organic acids and derivatives	Carboxylic acids and derivatives	Amino acids, peptides, and analogues
Glyma.08G109200	M225T65_NEG	-0.556652	0.0164225	Naringenin-chalcone synthase / Flavonone synthase	Glucoheptonic acid	Organic oxygen compounds	Organooxygen compounds	Carbohydrates and carbohydrate conjugates
Glyma.08G109200	M226T66_NEG	-0.543317	0.0197904	Naringenin-chalcone synthase / Flavonone synthase	Arogenic acid	Organic acids and derivatives	Carboxylic acids and derivatives	Amino acids, peptides, and analogues
Glyma.08G109200	M228T72_POS	-0.529982	0.0236796	Naringenin-chalcone synthase / Flavonone synthase	5-(2'-Carboxyethyl)-4,6-dihydroxypicolinate	Organoheterocyclic compounds	Pyridines and derivatives	Pyridinecarboxylic acids and derivatives
Glyma.08G109200	M237T724_POS	0.552976	0.0173017	Naringenin-chalcone synthase / Flavonone synthase	Aubergenone	Lipids and lipid-like molecules	Prenol lipids	Sesquiterpenoids
Glyma.08G109200	M238T70_POS	0.792396	8.83366e-05	Naringenin-chalcone synthase / Flavonone synthase	S-succinylcysteine	Organic acids and derivatives	Carboxylic acids and derivatives	Amino acids, peptides, and analogues
Glyma.08G109200	M253T341_NEG	0.517604	0.0278015	Naringenin-chalcone synthase / Flavonone synthase	L-Arginine phosphate	Organic acids and derivatives	Carboxylic acids and derivatives	Amino acids, peptides, and analogues
Glyma.08G109200	M269T389_NEG	0.559619	0.0157388	Naringenin-chalcone synthase / Flavonone synthase	4',6,7-Trihydroxyisoflavone	Phenylpropanoids and polyketides	Isoflavonoids	Isoflav-2-enes
Glyma.08G109200	M273T639_POS	0.545035	0.0193283	Naringenin-chalcone synthase / Flavonone synthase	Naringenin chalcone	Phenylpropanoids and polyketides	Linear 1,3-diarylpropanoids	Chalcones and dihydrochalcones
Glyma.08G109200	M288T742_POS	0.712382	0.00090911	Naringenin-chalcone synthase / Flavonone synthase	Lauryl diethanolamide	Lipids and lipid-like molecules	Fatty Acyls	Fatty amides
Glyma.08G109200	M298T830_POS	0.62128	0.00592235	Naringenin-chalcone synthase / Flavonone synthase	N7-methylguanosine
Glyma.08G109200	M302T722_POS	0.547004	0.0188093	Naringenin-chalcone synthase / Flavonone synthase	CIF 3
Glyma.08G109200	M303T888_POS	0.915479	1.00194e-07	Naringenin-chalcone synthase / Flavonone synthase	(3R,4R)-3-(6-hydroxy-1,3-benzodioxol-5-yl)-3,4-dihydro-2H-chromene-4,7-diol
Glyma.08G109200	M308T421_POS	-0.522461	0.0261224	Naringenin-chalcone synthase / Flavonone synthase	Dihydroascorbigen	Organoheterocyclic compounds	Indoles and derivatives	Indoles
Glyma.08G109200	M309T463_NEG	0.61962	0.00609599	Naringenin-chalcone synthase / Flavonone synthase	Sinapine	Phenylpropanoids and polyketides	Cinnamic acids and derivatives	Hydroxycinnamic acids and derivatives
Glyma.08G109200	M315T416_POS	0.592727	0.00953372	Naringenin-chalcone synthase / Flavonone synthase	6-O-Acetylarbutin	Organic oxygen compounds	Organooxygen compounds	Carbohydrates and carbohydrate conjugates
Glyma.08G109200	M322T702_NEG	0.565717	0.0144047	Naringenin-chalcone synthase / Flavonone synthase	(-)-Jasmonoyl-L-isoleucine	Organic acids and derivatives	Carboxylic acids and derivatives	Amino acids, peptides, and analogues
Glyma.08G109200	M323T391_NEG	0.51682	0.0280804	Naringenin-chalcone synthase / Flavonone synthase	5-enolpyruvoyl-shikimate 3-phosphate
Glyma.08G109200	M336T913_POS	0.936472	1.09163e-08	Naringenin-chalcone synthase / Flavonone synthase	N4-(beta-N-acetyl-D-glucosaminyl)-L-asparagine
Glyma.08G109200	M338T700_POS	0.680104	0.00189872	Naringenin-chalcone synthase / Flavonone synthase	5-Hydroxymethyldeoxycytidylate	Nucleosides, nucleotides, and analogues	Pyrimidine nucleotides	Pyrimidine deoxyribonucleotides
Glyma.08G109200	M347T786_POS	0.662054	0.00276099	Naringenin-chalcone synthase / Flavonone synthase	Corticosterone	Lipids and lipid-like molecules	Steroids and steroid derivatives	Hydroxysteroids
Glyma.08G109200	M352T713_NEG	0.512291	0.029733	Naringenin-chalcone synthase / Flavonone synthase	2,5-diamino-6-(5-phospho-D-ribosylamino)pyrimidin-4(3H)-one
Glyma.08G109200	M363T910_POS	0.949964	1.68756e-09	Naringenin-chalcone synthase / Flavonone synthase	3,6,9,12-Tetraoxatetracosan-1-ol	Organic oxygen compounds	Organooxygen compounds	Ethers
Glyma.08G109200	M363T922_NEG	0.833447	1.74062e-05	Naringenin-chalcone synthase / Flavonone synthase	XMP
Glyma.08G109200	M383T829_POS	0.501558	0.0339509	Naringenin-chalcone synthase / Flavonone synthase	Histamine-trifluoromethyltoluide	Benzenoids	Benzene and substituted derivatives	Trifluoromethylbenzenes
Glyma.08G109200	M391T699_NEG	0.675302	0.00210271	Naringenin-chalcone synthase / Flavonone synthase	5-O-Demethylnobiletin
Glyma.08G109200	M417T438_POS	0.648206	0.0036214	Naringenin-chalcone synthase / Flavonone synthase	Daidzein-8-C-glucoside	Phenylpropanoids and polyketides	Isoflavonoids	Isoflavonoid C-glycosides
Glyma.08G109200	M430T906_POS	0.955713	6.47395e-10	Naringenin-chalcone synthase / Flavonone synthase	15alpha-Hydroxysolasodine	Lipids and lipid-like molecules	Steroids and steroid derivatives	Steroidal alkaloids
Glyma.08G109200	M433T374_POS	0.551162	0.0177491	Naringenin-chalcone synthase / Flavonone synthase	Apigenin-7-O-glucoside	Phenylpropanoids and polyketides	Flavonoids	Flavonoid glycosides
Glyma.08G109200	M435T443_POS	0.722197	0.000712775	Naringenin-chalcone synthase / Flavonone synthase	Reynoutrin	Phenylpropanoids and polyketides	Flavonoids	Flavonoid glycosides
Glyma.08G109200	M471T243_NEG	0.963646	1.36848e-10	Naringenin-chalcone synthase / Flavonone synthase	Hassmarin	Phenylpropanoids and polyketides	Coumarins and derivatives	Pyranocoumarins
Glyma.08G109200	M613T608_NEG	0.565461	0.0144588	Naringenin-chalcone synthase / Flavonone synthase	Neomycin B	Organic oxygen compounds	Organooxygen compounds	Carbohydrates and carbohydrate conjugates
Glyma.08G109200	M629T490_NEG	0.748766	0.000349854	Naringenin-chalcone synthase / Flavonone synthase	GDP-4-acetamido-4,6-dideoxy-alpha-D-mannose	Nucleosides, nucleotides, and analogues	Purine nucleotides	Purine nucleotide sugars
Glyma.08G109200	M640T413_POS	0.795418	7.93675e-05	Naringenin-chalcone synthase / Flavonone synthase	Demethyl-desacetyl-rifamycin S	Phenylpropanoids and polyketides	Macrolactams	NA
Glyma.08G109200	M74T103_POS	0.698973	0.00124846	Naringenin-chalcone synthase / Flavonone synthase	N,N-Dimethylformamide	Organic acids and derivatives	Carboxylic acids and derivatives	Carboxylic acid derivatives
Glyma.08G109200	M883T701_NEG	0.637994	0.00438724	Naringenin-chalcone synthase / Flavonone synthase	Pennogenin 3-O-beta-chacotrioside	Lipids and lipid-like molecules	Steroids and steroid derivatives	Steroidal glycosides
Glyma.08G109200	M88T67_NEG	0.514061	0.0290785	Naringenin-chalcone synthase / Flavonone synthase	L-Alanine	Organic acids and derivatives	Carboxylic acids and derivatives	Amino acids, peptides, and analogues
Glyma.08G109200	M90T68_POS	0.921641	5.57755e-08	Naringenin-chalcone synthase / Flavonone synthase	beta-Alanine	Organic acids and derivatives	Carboxylic acids and derivatives	Amino acids, peptides, and analogues
Glyma.08G109200	M974T533_3_POS	0.630823	0.0050002	Naringenin-chalcone synthase / Flavonone synthase	Sinapoyl-CoA	Lipids and lipid-like molecules	Fatty Acyls	Fatty acyl thioesters
Glyma.08G109300	M101T73_POS	-0.507786	0.031451	Naringenin-chalcone synthase / Flavonone synthase	Tiglic acid	Lipids and lipid-like molecules	Fatty Acyls	Fatty acids and conjugates
Glyma.08G109300	M111T908_POS	-0.578426	0.0119128	Naringenin-chalcone synthase / Flavonone synthase	catechol
Glyma.08G109300	M122T982_NEG	-0.601735	0.00824248	Naringenin-chalcone synthase / Flavonone synthase	Vitamin B3	Organoheterocyclic compounds	Pyridines and derivatives	Pyridinecarboxylic acids and derivatives
Glyma.08G109300	M129T909_POS	-0.620885	0.00596324	Naringenin-chalcone synthase / Flavonone synthase	3-Octanone	Organic oxygen compounds	Organooxygen compounds	Carbonyl compounds
Glyma.08G109300	M137T538_POS	-0.583134	0.0110823	Naringenin-chalcone synthase / Flavonone synthase	3,4-Dihydroxystyrene	Benzenoids	Phenols	Benzenediols
Glyma.08G109300	M151T119_NEG	-0.576124	0.0123366	Naringenin-chalcone synthase / Flavonone synthase	Vanillin	Benzenoids	Phenols	Methoxyphenols
Glyma.08G109300	M151T563_NEG	0.545346	0.0192458	Naringenin-chalcone synthase / Flavonone synthase	3,5-Dimethoxytoluene	Benzenoids	Benzene and substituted derivatives	Methoxybenzenes
Glyma.08G109300	M160T70_POS	-0.516819	0.0280806	Naringenin-chalcone synthase / Flavonone synthase	Calystegine A5	Alkaloids and derivatives	Tropane alkaloids
Glyma.08G109300	M161T69_POS	0.509754	0.0306911	Naringenin-chalcone synthase / Flavonone synthase	N(alpha)-Acetyl-L-2,4-diaminobutyrate	Organic acids and derivatives	Carboxylic acids and derivatives	Amino acids, peptides, and analogues
Glyma.08G109300	M162T842_POS	-0.518039	0.0276477	Naringenin-chalcone synthase / Flavonone synthase	N-Formyl-L-aspartate	Organic acids and derivatives	Carboxylic acids and derivatives	Amino acids, peptides, and analogues
Glyma.08G109300	M169T217_NEG	-0.502252	0.0336649	Naringenin-chalcone synthase / Flavonone synthase	3,4-Dihydroxyphenylethyleneglycol	Benzenoids	Phenols	Benzenediols
Glyma.08G109300	M170T1011_POS	0.50329	0.0332407	Naringenin-chalcone synthase / Flavonone synthase	L-Selenocysteine	Organic acids and derivatives	Carboxylic acids and derivatives	Amino acids, peptides, and analogues
Glyma.08G109300	M174T421_NEG	0.634562	0.00467242	Naringenin-chalcone synthase / Flavonone synthase	L-Citrulline	Organic acids and derivatives	Carboxylic acids and derivatives	Amino acids, peptides, and analogues
Glyma.08G109300	M176T938_POS	-0.513501	0.0292842	Naringenin-chalcone synthase / Flavonone synthase	Carboxynorspermidine	Organic acids and derivatives	Carboxylic acids and derivatives	Amino acids, peptides, and analogues
Glyma.08G109300	M180T108_POS	0.518426	0.0275118	Naringenin-chalcone synthase / Flavonone synthase	D-(+)-Glucosamine hydrochloride	Organic oxygen compounds	Organooxygen compounds	Carbohydrates and carbohydrate conjugates
Glyma.08G109300	M183T406_NEG	-0.518143	0.0276112	Naringenin-chalcone synthase / Flavonone synthase	1-deoxy-L-glycero-tetrulose 4-phosphate
Glyma.08G109300	M191T533_POS	0.624289	0.0056178	Naringenin-chalcone synthase / Flavonone synthase	cyclic- 3,4-O-oxalyl-L-threonate
Glyma.08G109300	M195T215_POS	-0.50021	0.0345119	Naringenin-chalcone synthase / Flavonone synthase	Methyl caffeate	Phenylpropanoids and polyketides	Cinnamic acids and derivatives	Hydroxycinnamic acids and derivatives
Glyma.08G109300	M199T191_POS	-0.518481	0.0274923	Naringenin-chalcone synthase / Flavonone synthase	7-Deoxyloganetate	Lipids and lipid-like molecules	Prenol lipids	Monoterpenoids
Glyma.08G109300	M199T345_POS	-0.508573	0.0311453	Naringenin-chalcone synthase / Flavonone synthase	Syringic acid	Benzenoids	Benzene and substituted derivatives	Benzoic acids and derivatives
Glyma.08G109300	M199T909_POS	-0.636883	0.00447795	Naringenin-chalcone synthase / Flavonone synthase	Citronellyl acetate	Lipids and lipid-like molecules	Fatty Acyls	Fatty alcohol esters
Glyma.08G109300	M205T864_POS	-0.504657	0.0326885	Naringenin-chalcone synthase / Flavonone synthase	Pentalenene	Lipids and lipid-like molecules	Prenol lipids	Sesquiterpenoids
Glyma.08G109300	M209T486_POS	-0.556344	0.0164948	Naringenin-chalcone synthase / Flavonone synthase	Sinapoyl aldehyde	Benzenoids	Phenols	Methoxyphenols
Glyma.08G109300	M209T507_POS	-0.545105	0.0193096	Naringenin-chalcone synthase / Flavonone synthase	Ferulic acid methyl ester	Phenylpropanoids and polyketides	Cinnamic acids and derivatives	Hydroxycinnamic acids and derivatives
Glyma.08G109300	M212T318_NEG	-0.597957	0.00876557	Naringenin-chalcone synthase / Flavonone synthase	N,N-Dihydroxy-L-tyrosine	Organic acids and derivatives	Carboxylic acids and derivatives	Amino acids, peptides, and analogues
Glyma.08G109300	M213T102_NEG	-0.537037	0.021554	Naringenin-chalcone synthase / Flavonone synthase	2-Oxo-3-hydroxy-4-phosphobutanoate	Organic acids and derivatives	Keto acids and derivatives	Short-chain keto acids and derivatives
Glyma.08G109300	M213T603_NEG	0.576432	0.0122792	Naringenin-chalcone synthase / Flavonone synthase	1-deoxy-D-xylulose 5-phosphate
Glyma.08G109300	M216T625_NEG	0.688664	0.00157571	Naringenin-chalcone synthase / Flavonone synthase	beta-Alanyl-L-lysine	Organic acids and derivatives	Peptidomimetics	Hybrid peptides
Glyma.08G109300	M230T707_2_POS	-0.536012	0.0218529	Naringenin-chalcone synthase / Flavonone synthase	N,N-Dimethyldodecylamine N-oxide	Organic nitrogen compounds	Organonitrogen compounds	Aminoxides
Glyma.08G109300	M237T724_POS	0.51937	0.0271816	Naringenin-chalcone synthase / Flavonone synthase	Aubergenone	Lipids and lipid-like molecules	Prenol lipids	Sesquiterpenoids
Glyma.08G109300	M244T86_POS	0.513971	0.0291115	Naringenin-chalcone synthase / Flavonone synthase	CYTIDINE	Nucleosides, nucleotides, and analogues	Pyrimidine nucleosides	NA
Glyma.08G109300	M251T361_POS	-0.5434	0.019768	Naringenin-chalcone synthase / Flavonone synthase	Samin	Organoheterocyclic compounds	Benzodioxoles
Glyma.08G109300	M251T438_NEG	-0.547541	0.0186697	Naringenin-chalcone synthase / Flavonone synthase	S-(4-Methylthiobutylthiohydroximoyl)-L-cysteine	Organic acids and derivatives	Thiohydroximic acids and derivatives	Thiohydroximic acids
Glyma.08G109300	M258T591_POS	-0.557194	0.0162959	Naringenin-chalcone synthase / Flavonone synthase	1,3,5-Trihydroxy-10-methylacridone	Organoheterocyclic compounds	Quinolines and derivatives	Benzoquinolines
Glyma.08G109300	M265T614_POS	0.52227	0.026187	Naringenin-chalcone synthase / Flavonone synthase	Norlinolenic acid	Lipids and lipid-like molecules	Fatty Acyls	Fatty acids and conjugates
Glyma.08G109300	M265T763_NEG	-0.516992	0.028019	Naringenin-chalcone synthase / Flavonone synthase	lauryl sulfate	Organic acids and derivatives	Organic sulfuric acids and derivatives	Sulfuric acid esters
Glyma.08G109300	M267T491_NEG	-0.527627	0.0244244	Naringenin-chalcone synthase / Flavonone synthase	Inosine	Nucleosides, nucleotides, and analogues	Purine nucleosides
Glyma.08G109300	M273T388_POS	-0.54487	0.0193725	Naringenin-chalcone synthase / Flavonone synthase	Deoxyshikonin	Benzenoids	Naphthalenes	Naphthoquinones
Glyma.08G109300	M275T704_2_POS	-0.522431	0.0261326	Naringenin-chalcone synthase / Flavonone synthase	apiforol
Glyma.08G109300	M277T74_POS	-0.563249	0.0149333	Naringenin-chalcone synthase / Flavonone synthase	6-Phosphogluconic acid	Organic oxygen compounds	Organooxygen compounds	Carbohydrates and carbohydrate conjugates
Glyma.08G109300	M279T781_POS	0.559918	0.0156713	Naringenin-chalcone synthase / Flavonone synthase	?-linolenic acid	Lipids and lipid-like molecules	Fatty Acyls	Lineolic acids and derivatives
Glyma.08G109300	M285T308_POS	-0.571164	0.0132904	Naringenin-chalcone synthase / Flavonone synthase	xanthosine
Glyma.08G109300	M288T186_NEG	0.609919	0.00719518	Naringenin-chalcone synthase / Flavonone synthase	Hyoscyamine	Alkaloids and derivatives	Tropane alkaloids
Glyma.08G109300	M290T635_POS	-0.533364	0.0226409	Naringenin-chalcone synthase / Flavonone synthase	N-Succinyl-2-L-amino-6-oxoheptanedioate	Organic acids and derivatives	Carboxylic acids and derivatives	Amino acids, peptides, and analogues
Glyma.08G109300	M291T360_NEG	-0.545778	0.0191311	Naringenin-chalcone synthase / Flavonone synthase	cis-5-Methoxydecursidinol	Phenylpropanoids and polyketides	Coumarins and derivatives	Pyranocoumarins
Glyma.08G109300	M295T780_NEG	0.541252	0.0203574	Naringenin-chalcone synthase / Flavonone synthase	13(S)-HODE	Lipids and lipid-like molecules	Fatty Acyls	Lineolic acids and derivatives
Glyma.08G109300	M298T403_NEG	-0.542139	0.0201122	Naringenin-chalcone synthase / Flavonone synthase	Caffeoyl tyramine	Phenylpropanoids and polyketides	Cinnamic acids and derivatives	Hydroxycinnamic acids and derivatives
Glyma.08G109300	M299T263_NEG	0.511735	0.029941	Naringenin-chalcone synthase / Flavonone synthase	4-(beta-D-Glucosyloxy)benzoate	Organic oxygen compounds	Organooxygen compounds	Carbohydrates and carbohydrate conjugates
Glyma.08G109300	M299T408_NEG	-0.504075	0.0329227	Naringenin-chalcone synthase / Flavonone synthase	Icariside D2	Organic oxygen compounds	Organooxygen compounds	Carbohydrates and carbohydrate conjugates
Glyma.08G109300	M300T263_NEG	0.507442	0.0315853	Naringenin-chalcone synthase / Flavonone synthase	Grandisine II	Organoheterocyclic compounds	Quinolines and derivatives	Benzoquinolines
Glyma.08G109300	M301T503_POS	-0.505442	0.0323745	Naringenin-chalcone synthase / Flavonone synthase	Astraciceran	Phenylpropanoids and polyketides	Isoflavonoids	O-methylated isoflavonoids
Glyma.08G109300	M301T530_NEG	-0.538406	0.0211593	Naringenin-chalcone synthase / Flavonone synthase	(-)-Mucronulatol	Phenylpropanoids and polyketides	Isoflavonoids	O-methylated isoflavonoids
Glyma.08G109300	M302T722_POS	0.537012	0.0215612	Naringenin-chalcone synthase / Flavonone synthase	CIF 3
Glyma.08G109300	M302T727_POS	-0.541686	0.0202372	Naringenin-chalcone synthase / Flavonone synthase	Sphinganine	Organic nitrogen compounds	Organonitrogen compounds	Amines
Glyma.08G109300	M305T814_POS	0.537705	0.0213608	Naringenin-chalcone synthase / Flavonone synthase	3-Acetoxy-9-heptadecene-4,6-diyn-8-ol.	Lipids and lipid-like molecules	Fatty Acyls	Fatty alcohol esters
Glyma.08G109300	M311T614_POS	0.50484	0.0326151	Naringenin-chalcone synthase / Flavonone synthase	13(S)-HPOT	Lipids and lipid-like molecules	Fatty Acyls	Lineolic acids and derivatives
Glyma.08G109300	M312T554_NEG	-0.545044	0.019326	Naringenin-chalcone synthase / Flavonone synthase	N-cis-Feruloyltyramine	Phenylpropanoids and polyketides	Cinnamic acids and derivatives	Hydroxycinnamic acids and derivatives
Glyma.08G109300	M313T734_NEG	0.535952	0.0218706	Naringenin-chalcone synthase / Flavonone synthase	12,13-DHOME	Lipids and lipid-like molecules	Fatty Acyls	Fatty acids and conjugates
Glyma.08G109300	M323T463_POS	-0.541501	0.0202883	Naringenin-chalcone synthase / Flavonone synthase	Phaseolin	Phenylpropanoids and polyketides	Isoflavonoids	Furanoisoflavonoids
Glyma.08G109300	M323T538_POS	-0.5399	0.0207354	Naringenin-chalcone synthase / Flavonone synthase	N-((R)-Pantothenoyl)-L-cysteine	Organic acids and derivatives	Peptidomimetics	Hybrid peptides
Glyma.08G109300	M324T463_POS	-0.509768	0.0306858	Naringenin-chalcone synthase / Flavonone synthase	Bialaphos	Organic acids and derivatives	Carboxylic acids and derivatives	Amino acids, peptides, and analogues
Glyma.08G109300	M327T374_POS	-0.600934	0.00835121	Naringenin-chalcone synthase / Flavonone synthase	Humilixanthin	Organic acids and derivatives	Carboxylic acids and derivatives	Amino acids, peptides, and analogues
Glyma.08G109300	M335T585_NEG	-0.534641	0.0222584	Naringenin-chalcone synthase / Flavonone synthase	Nicotinate D-ribonucleotide	Nucleosides, nucleotides, and analogues	Pyridine nucleotides	Nicotinic acid nucleotides
Glyma.08G109300	M336T438_POS	0.50007	0.0345704	Naringenin-chalcone synthase / Flavonone synthase	Oryzamutaic acid D	Organoheterocyclic compounds	Diazanaphthalenes	Naphthyridines
Glyma.08G109300	M336T493_POS	0.540752	0.0204964	Naringenin-chalcone synthase / Flavonone synthase	7,8-dihydroneopterin 3-phosphate
Glyma.08G109300	M337T70_NEG	-0.608865	0.00732375	Naringenin-chalcone synthase / Flavonone synthase	p-Coumaroyl quinic acid	Organic oxygen compounds	Organooxygen compounds	Alcohols and polyols
Glyma.08G109300	M339T262_POS	0.509383	0.0308334	Naringenin-chalcone synthase / Flavonone synthase	Versicolorin A	Benzenoids	Anthracenes	Anthraquinones
Glyma.08G109300	M339T479_POS	-0.516845	0.0280712	Naringenin-chalcone synthase / Flavonone synthase	Citflavanone	Phenylpropanoids and polyketides	Flavonoids	Pyranoflavonoids
Glyma.08G109300	M341T444_POS	-0.501101	0.0341404	Naringenin-chalcone synthase / Flavonone synthase	Glyceollidin I	Phenylpropanoids and polyketides	Isoflavonoids	Furanoisoflavonoids
Glyma.08G109300	M341T538_POS	-0.512048	0.0298239	Naringenin-chalcone synthase / Flavonone synthase	Desmethylxanthohumol	Phenylpropanoids and polyketides	Linear 1,3-diarylpropanoids	Chalcones and dihydrochalcones
Glyma.08G109300	M342T395_NEG	-0.624498	0.00559714	Naringenin-chalcone synthase / Flavonone synthase	N-trans-Feruloylhomovanillylamine	Phenylpropanoids and polyketides	Cinnamic acids and derivatives	Hydroxycinnamic acids and derivatives
Glyma.08G109300	M343T472_POS	-0.524675	0.0253837	Naringenin-chalcone synthase / Flavonone synthase	alpha,alpha-trehalose
Glyma.08G109300	M345T433_POS	-0.518248	0.0275741	Naringenin-chalcone synthase / Flavonone synthase	Melibiitol	Lipids and lipid-like molecules	Fatty Acyls	Fatty acyl glycosides
Glyma.08G109300	M351T615_POS	0.514187	0.0290321	Naringenin-chalcone synthase / Flavonone synthase	(5Z,13E)-11alpha-Hydroxy-9,15-dioxoprost-13-enoate	Lipids and lipid-like molecules	Fatty Acyls	Eicosanoids
Glyma.08G109300	M353T150_POS	-0.502268	0.0336585	Naringenin-chalcone synthase / Flavonone synthase	Arbutin 6-phosphate	Organic oxygen compounds	Organooxygen compounds	Carbohydrates and carbohydrate conjugates
Glyma.08G109300	M353T70_NEG	-0.56573	0.0144019	Naringenin-chalcone synthase / Flavonone synthase	Chlorogenate	Organic oxygen compounds	Organooxygen compounds	Alcohols and polyols
Glyma.08G109300	M356T767_POS	-0.67761	0.00200253	Naringenin-chalcone synthase / Flavonone synthase	Arachidoyl Ethanolamide	Organic nitrogen compounds	Organonitrogen compounds	Amines
Glyma.08G109300	M357T455_NEG	-0.534596	0.0222717	Naringenin-chalcone synthase / Flavonone synthase	Dehydrodiconiferyl alcohol	Phenylpropanoids and polyketides	2-arylbenzofuran flavonoids
Glyma.08G109300	M357T481_POS	-0.60675	0.00758712	Naringenin-chalcone synthase / Flavonone synthase	Norsolorinic acid anthrone	Benzenoids	Anthracenes	NA
Glyma.08G109300	M357T605_POS	-0.509211	0.0308992	Naringenin-chalcone synthase / Flavonone synthase	Pluviatilol	Lignans, neolignans and related compounds	Furanoid lignans
Glyma.08G109300	M358T537_POS	-0.607174	0.0075338	Naringenin-chalcone synthase / Flavonone synthase	p-chloromercuribenzoate
Glyma.08G109300	M359T442_POS	-0.550822	0.0178342	Naringenin-chalcone synthase / Flavonone synthase	Matairesinol	Lignans, neolignans and related compounds	Furanoid lignans	Tetrahydrofuran lignans
Glyma.08G109300	M361T191_POS	-0.503926	0.032983	Naringenin-chalcone synthase / Flavonone synthase	7-Deoxyloganate	Lipids and lipid-like molecules	Prenol lipids	Terpene glycosides
Glyma.08G109300	M366T481_NEG	-0.535718	0.0219395	Naringenin-chalcone synthase / Flavonone synthase	Citracridone II	Organoheterocyclic compounds	Quinolines and derivatives	Benzoquinolines
Glyma.08G109300	M367T654_POS	-0.66229	0.00274792	Naringenin-chalcone synthase / Flavonone synthase	20-COOH-Leukotriene B4	Lipids and lipid-like molecules	Fatty Acyls	Fatty acids and conjugates
Glyma.08G109300	M371T539_NEG	-0.550585	0.0178934	Naringenin-chalcone synthase / Flavonone synthase	Biocytin	Organoheterocyclic compounds	Biotin and derivatives	NA
Glyma.08G109300	M382T741_POS	-0.571816	0.0131618	Naringenin-chalcone synthase / Flavonone synthase	Sphinganine 1-phosphate	Lipids and lipid-like molecules	Sphingolipids	Phosphosphingolipids
Glyma.08G109300	M389T407_NEG	-0.517781	0.0277389	Naringenin-chalcone synthase / Flavonone synthase	Loganin	Lipids and lipid-like molecules	Prenol lipids	Terpene glycosides
Glyma.08G109300	M389T557_POS	-0.508488	0.0311785	Naringenin-chalcone synthase / Flavonone synthase	(+-)-Strigol acetate	Lipids and lipid-like molecules	Prenol lipids	Terpene lactones
Glyma.08G109300	M399T441_POS	-0.59138	0.00973991	Naringenin-chalcone synthase / Flavonone synthase	S-(5'-Adenosyl)-L-methionine chloride	Nucleosides, nucleotides, and analogues	5'-deoxyribonucleosides	5'-deoxy-5'-thionucleosides
Glyma.08G109300	M400T436_POS	-0.595112	0.00917705	Naringenin-chalcone synthase / Flavonone synthase	Narcotoline	Alkaloids and derivatives	Phthalide isoquinolines	NA
Glyma.08G109300	M404T909_POS	-0.560107	0.0156285	Naringenin-chalcone synthase / Flavonone synthase	CDP group
Glyma.08G109300	M405T528_POS	-0.506584	0.031922	Naringenin-chalcone synthase / Flavonone synthase	UDP
Glyma.08G109300	M419T758_POS	-0.724354	0.000674774	Naringenin-chalcone synthase / Flavonone synthase	3-epi-6-Deoxocathasterone	Lipids and lipid-like molecules	Steroids and steroid derivatives	Bile acids, alcohols and derivatives
Glyma.08G109300	M421T437_NEG	-0.504578	0.0327202	Naringenin-chalcone synthase / Flavonone synthase	Crepidiaside A	Organic oxygen compounds	Organooxygen compounds	Carbohydrates and carbohydrate conjugates
Glyma.08G109300	M423T345_NEG	0.637053	0.00446398	Naringenin-chalcone synthase / Flavonone synthase	Butyrolactone I	Lipids and lipid-like molecules	Fatty Acyls	Fatty acid esters
Glyma.08G109300	M427T380_NEG	-0.595794	0.00907704	Naringenin-chalcone synthase / Flavonone synthase	(13S,14R)-1-Hydroxy-13-O-acetyl-N-methylcanadine	Alkaloids and derivatives	Protoberberine alkaloids and derivatives	NA
Glyma.08G109300	M435T268_POS	-0.506721	0.031868	Naringenin-chalcone synthase / Flavonone synthase	Glutathionylspermidine	Organic acids and derivatives	Carboxylic acids and derivatives	Amino acids, peptides, and analogues
Glyma.08G109300	M449T352_NEG	0.533074	0.0227286	Naringenin-chalcone synthase / Flavonone synthase	Copalyl diphosphate	Lipids and lipid-like molecules	Prenol lipids	Diterpenoids
Glyma.08G109300	M455T495_POS	0.615247	0.00657325	Naringenin-chalcone synthase / Flavonone synthase	5-phosphoribosyl-4-(N-succinocarboxamide)-5-aminoimidazole
Glyma.08G109300	M459T697_POS	-0.556787	0.0163909	Naringenin-chalcone synthase / Flavonone synthase	Soyasapogenol B	Lipids and lipid-like molecules	Prenol lipids	Triterpenoids
Glyma.08G109300	M462T445_POS	-0.587166	0.0104086	Naringenin-chalcone synthase / Flavonone synthase	D-Glucosylsphingosine	Lipids and lipid-like molecules	Sphingolipids	Glycosphingolipids
Glyma.08G109300	M469T272_NEG	0.524149	0.0255578	Naringenin-chalcone synthase / Flavonone synthase	Limonin	Lipids and lipid-like molecules	Prenol lipids	Triterpenoids
Glyma.08G109300	M469T539_POS	-0.545254	0.0192702	Naringenin-chalcone synthase / Flavonone synthase	Gentamicin A	Organic oxygen compounds	Organooxygen compounds	Carbohydrates and carbohydrate conjugates
Glyma.08G109300	M472T499_POS	-0.533481	0.0226058	Naringenin-chalcone synthase / Flavonone synthase	Terfenadine	Benzenoids	Benzene and substituted derivatives	Diphenylmethanes
Glyma.08G109300	M481T503_NEG	-0.623701	0.00567631	Naringenin-chalcone synthase / Flavonone synthase	2'-Dehydrokanamycin A	Organic oxygen compounds	Organooxygen compounds	Carbohydrates and carbohydrate conjugates
Glyma.08G109300	M483T531_NEG	-0.504798	0.0326321	Naringenin-chalcone synthase / Flavonone synthase	3''-Deamino-3''-hydroxykanamycin B	Organic oxygen compounds	Organooxygen compounds	Carbohydrates and carbohydrate conjugates
Glyma.08G109300	M484T526_POS	-0.530975	0.0233709	Naringenin-chalcone synthase / Flavonone synthase	Acrimarine M	Organoheterocyclic compounds	Quinolines and derivatives	Benzoquinolines
Glyma.08G109300	M487T512_POS	-0.555871	0.0166063	Naringenin-chalcone synthase / Flavonone synthase	Sudachinoid C	Lipids and lipid-like molecules	Prenol lipids	Triterpenoids
Glyma.08G109300	M496T670_POS	-0.582971	0.0111104	Naringenin-chalcone synthase / Flavonone synthase	N6-(Delta2-isopentenyl)-adenosine 5-diphosphate
Glyma.08G109300	M497T753_POS	-0.640893	0.0041575	Naringenin-chalcone synthase / Flavonone synthase	Polypodine B	Lipids and lipid-like molecules	Steroids and steroid derivatives	Bile acids, alcohols and derivatives
Glyma.08G109300	M503T463_POS	-0.52261	0.0260723	Naringenin-chalcone synthase / Flavonone synthase	Shihulimonin A	Lipids and lipid-like molecules	Prenol lipids	Triterpenoids
Glyma.08G109300	M505T669_POS	0.585492	0.0106842	Naringenin-chalcone synthase / Flavonone synthase	Isomaltotriose	Organic oxygen compounds	Organooxygen compounds	Carbohydrates and carbohydrate conjugates
Glyma.08G109300	M521T341_POS	-0.577011	0.0121718	Naringenin-chalcone synthase / Flavonone synthase	Ichanexic acid	Lipids and lipid-like molecules	Prenol lipids	Terpene lactones
Glyma.08G109300	M522T303_POS	0.553624	0.0171441	Naringenin-chalcone synthase / Flavonone synthase	4-(cytidine 5-diphospho)-2-C-methyl-D-erythritol
Glyma.08G109300	M538T401_NEG	-0.537403	0.0214477	Naringenin-chalcone synthase / Flavonone synthase	8-oxo-GTP
Glyma.08G109300	M549T423_2_NEG	-0.578406	0.0119164	Naringenin-chalcone synthase / Flavonone synthase	Hordatine A	Phenylpropanoids and polyketides	2-arylbenzofuran flavonoids
Glyma.08G109300	M551T379_NEG	-0.502546	0.0335443	Naringenin-chalcone synthase / Flavonone synthase	Lactucaside	Lignans, neolignans and related compounds	Lignan glycosides
Glyma.08G109300	M567T517_2_POS	-0.621106	0.00594032	Naringenin-chalcone synthase / Flavonone synthase	3-hydroxyechinenone	Lipids and lipid-like molecules	Prenol lipids	Tetraterpenoids
Glyma.08G109300	M575T466_POS	-0.634221	0.00470158	Naringenin-chalcone synthase / Flavonone synthase	Stigmasterol-3-O-beta-D-glucopyranoside	Lipids and lipid-like molecules	Steroids and steroid derivatives	Stigmastanes and derivatives
Glyma.08G109300	M578T517_POS	-0.666402	0.0025285	Naringenin-chalcone synthase / Flavonone synthase	C37-phenolphthiocerol A
Glyma.08G109300	M583T604_NEG	-0.506465	0.0319689	Naringenin-chalcone synthase / Flavonone synthase	Magnesium protoporphyrin	Organoheterocyclic compounds	Tetrapyrroles and derivatives	Metallotetrapyrroles
Glyma.08G109300	M585T556_NEG	-0.540369	0.0206035	Naringenin-chalcone synthase / Flavonone synthase	Baccatin III	Lipids and lipid-like molecules	Prenol lipids	Diterpenoids
Glyma.08G109300	M586T454_NEG	0.51773	0.0277571	Naringenin-chalcone synthase / Flavonone synthase	GDP-4-dehydro-6-deoxy-beta-L-galactose
Glyma.08G109300	M587T636_POS	-0.626257	0.00542558	Naringenin-chalcone synthase / Flavonone synthase	(3Z)-Phycocyanobilin	Organoheterocyclic compounds	Tetrapyrroles and derivatives	Bilirubins
Glyma.08G109300	M593T476_2_POS	-0.519577	0.0271097	Naringenin-chalcone synthase / Flavonone synthase	2''-O-alpha-L-Rhamnosyl-6-C-fucosyl-3'-methoxyluteoiin	Phenylpropanoids and polyketides	Flavonoids	Flavonoid glycosides
Glyma.08G109300	M613T594_NEG	-0.545854	0.0191112	Naringenin-chalcone synthase / Flavonone synthase	Chlorophyllide	Organoheterocyclic compounds	Tetrapyrroles and derivatives	Chlorins
Glyma.08G109300	M616T622_POS	-0.519085	0.0272808	Naringenin-chalcone synthase / Flavonone synthase	6'''-Deamino-6'''-hydroxyneomycin C	Organic oxygen compounds	Organooxygen compounds	Carbohydrates and carbohydrate conjugates
Glyma.08G109300	M625T491_POS	-0.505185	0.032477	Naringenin-chalcone synthase / Flavonone synthase	Buntanbismine	Organoheterocyclic compounds	Quinolines and derivatives	Benzoquinolines
Glyma.08G109300	M626T516_NEG	-0.51002	0.0305896	Naringenin-chalcone synthase / Flavonone synthase	Delphin
Glyma.08G109300	M629T566_NEG	-0.543019	0.0198715	Naringenin-chalcone synthase / Flavonone synthase	7(1)-Hydroxychlorophyllide a	Organoheterocyclic compounds	Tetrapyrroles and derivatives	Chlorins
Glyma.08G109300	M713T687_POS	-0.509272	0.030876	Naringenin-chalcone synthase / Flavonone synthase	Citrusin II	Organic acids and derivatives	Carboxylic acids and derivatives	Amino acids, peptides, and analogues
Glyma.08G109300	M809T589_NEG	-0.598636	0.00866965	Naringenin-chalcone synthase / Flavonone synthase	Betavulgaroside VII	Lipids and lipid-like molecules	Prenol lipids	Terpene glycosides
Glyma.08G109300	M80T477_POS	-0.600644	0.00839091	Naringenin-chalcone synthase / Flavonone synthase	Pyridine	Organoheterocyclic compounds	Pyridines and derivatives	NA
Glyma.08G109300	M80T81_NEG	-0.545675	0.0191584	Naringenin-chalcone synthase / Flavonone synthase	HSO3-	Homogeneous non-metal compounds	Non-metal oxoanionic compounds	Non-metal sulfites
Glyma.08G109300	M89T99_NEG	-0.555811	0.0166204	Naringenin-chalcone synthase / Flavonone synthase	DL-Lactic acid	Organic acids and derivatives	Hydroxy acids and derivatives	Alpha hydroxy acids and derivatives
Glyma.08G109300	M939T704_NEG	0.579004	0.0118082	Naringenin-chalcone synthase / Flavonone synthase	3-Rha(1-2)Gal(1-2)GluA-Soyasaponenol E	Lipids and lipid-like molecules	Prenol lipids	Terpene glycosides
Glyma.08G109300	M942T693_NEG	0.503125	0.0333079	Naringenin-chalcone synthase / Flavonone synthase	Soyasaponin Bb	Lipids and lipid-like molecules	Prenol lipids	Terpene glycosides
Glyma.08G109300	M942T706_POS	0.580373	0.0115635	Naringenin-chalcone synthase / Flavonone synthase	Dehydrosoyasaponin I	Lipids and lipid-like molecules	Prenol lipids	Terpene glycosides
Glyma.08G109300	M978T336_7_POS	-0.566991	0.0141376	Naringenin-chalcone synthase / Flavonone synthase	Portisin B
Glyma.08G109400	M136T410_NEG	0.573166	0.0128986	Naringenin-chalcone synthase / Flavonone synthase	4-Aminobenzoic acid	Benzenoids	Benzene and substituted derivatives	Benzoic acids and derivatives
Glyma.08G109400	M173T421_NEG	0.518739	0.027402	Naringenin-chalcone synthase / Flavonone synthase	Suberic acid	Lipids and lipid-like molecules	Fatty Acyls	Fatty acids and conjugates
Glyma.08G109400	M208T410_NEG	0.533789	0.022513	Naringenin-chalcone synthase / Flavonone synthase	p-Hydroxyphenylacetylglycine	Organic acids and derivatives	Carboxylic acids and derivatives	Amino acids, peptides, and analogues
Glyma.08G109400	M252T410_2_NEG	0.560699	0.0154957	Naringenin-chalcone synthase / Flavonone synthase	N-Salicyloylaspartic acid	Organic acids and derivatives	Carboxylic acids and derivatives	Amino acids, peptides, and analogues
Glyma.08G109400	M253T341_NEG	0.508399	0.0312127	Naringenin-chalcone synthase / Flavonone synthase	L-Arginine phosphate	Organic acids and derivatives	Carboxylic acids and derivatives	Amino acids, peptides, and analogues
Glyma.08G109400	M253T410_NEG	0.558078	0.0160911	Naringenin-chalcone synthase / Flavonone synthase	5,7-Dihydroxyisoflavone	Phenylpropanoids and polyketides	Isoflavonoids	Isoflav-2-enes
Glyma.08G109400	M266T505_NEG	0.540678	0.020517	Naringenin-chalcone synthase / Flavonone synthase	S-Ribosyl-L-homocysteine	Organic oxygen compounds	Organooxygen compounds	Carbohydrates and carbohydrate conjugates
Glyma.08G109400	M285T253_NEG	0.571801	0.0131647	Naringenin-chalcone synthase / Flavonone synthase	Salicin	Organic oxygen compounds	Organooxygen compounds	Carbohydrates and carbohydrate conjugates
Glyma.08G109400	M316T132_NEG	0.607707	0.00746706	Naringenin-chalcone synthase / Flavonone synthase	Citramine	Organoheterocyclic compounds	Quinolines and derivatives	Benzoquinolines
Glyma.08G109400	M363T922_NEG	0.507411	0.0315972	Naringenin-chalcone synthase / Flavonone synthase	XMP
Glyma.08G109400	M461T490_NEG	0.643748	0.00394098	Naringenin-chalcone synthase / Flavonone synthase	6-C-beta-D-Glucopyranosyldiosmetin	Phenylpropanoids and polyketides	Flavonoids	Flavonoid glycosides
Glyma.08G109400	M84T70_POS	0.6209	0.0059617	Naringenin-chalcone synthase / Flavonone synthase	1-Cyanobutane	Organic nitrogen compounds	Organonitrogen compounds	Organic cyanides
Glyma.08G109500	M106T70_POS	0.529893	0.0237072	Naringenin-chalcone synthase / Flavonone synthase	L-Serine	Organic acids and derivatives	Carboxylic acids and derivatives	Amino acids, peptides, and analogues
Glyma.08G109500	M115T75_NEG	-0.593637	0.00939623	Naringenin-chalcone synthase / Flavonone synthase	Maleic acid	Organic acids and derivatives	Carboxylic acids and derivatives	Dicarboxylic acids and derivatives
Glyma.08G109500	M116T69_POS	-0.503022	0.0333499	Naringenin-chalcone synthase / Flavonone synthase	L-Proline	Organic acids and derivatives	Carboxylic acids and derivatives	Amino acids, peptides, and analogues
Glyma.08G109500	M119T67_NEG	-0.592943	0.00950097	Naringenin-chalcone synthase / Flavonone synthase	3,4-Dihydroxybutanoic acid	Organic acids and derivatives	Hydroxy acids and derivatives	Beta hydroxy acids and derivatives
Glyma.08G109500	M136T410_NEG	0.578673	0.011868	Naringenin-chalcone synthase / Flavonone synthase	4-Aminobenzoic acid	Benzenoids	Benzene and substituted derivatives	Benzoic acids and derivatives
Glyma.08G109500	M137T479_POS	-0.558539	0.0159852	Naringenin-chalcone synthase / Flavonone synthase	2-Hydroxyacetophenone	Organic oxygen compounds	Organooxygen compounds	Carbonyl compounds
Glyma.08G109500	M137T530_NEG	0.536297	0.0217696	Naringenin-chalcone synthase / Flavonone synthase	4-Hydroxybenzoate	Benzenoids	Benzene and substituted derivatives	Benzoic acids and derivatives
Glyma.08G109500	M142T68_NEG	-0.720519	0.000743576	Naringenin-chalcone synthase / Flavonone synthase	N-Formylmaleamic acid	Lipids and lipid-like molecules	Fatty Acyls	Fatty amides
Glyma.08G109500	M146T71_POS	-0.633591	0.00475585	Naringenin-chalcone synthase / Flavonone synthase	4-[(Aminoiminomethyl)amino]butanoic acid	Organic acids and derivatives	Carboxylic acids and derivatives	Amino acids, peptides, and analogues
Glyma.08G109500	M147T190_POS	-0.594913	0.00920632	Naringenin-chalcone synthase / Flavonone synthase	Coumarin	Phenylpropanoids and polyketides	Coumarins and derivatives
Glyma.08G109500	M149T71_2_NEG	-0.546109	0.0190438	Naringenin-chalcone synthase / Flavonone synthase	Lyxose	Organic oxygen compounds	Organooxygen compounds	Carbohydrates and carbohydrate conjugates
Glyma.08G109500	M150T71_NEG	-0.537811	0.0213301	Naringenin-chalcone synthase / Flavonone synthase	Guanine	Organoheterocyclic compounds	Imidazopyrimidines	Purines and purine derivatives
Glyma.08G109500	M151T119_NEG	-0.512245	0.0297501	Naringenin-chalcone synthase / Flavonone synthase	Vanillin	Benzenoids	Phenols	Methoxyphenols
Glyma.08G109500	M151T71_NEG	-0.560113	0.0156272	Naringenin-chalcone synthase / Flavonone synthase	N1-Methyl-2-pyridone-5-carboxamide	Organoheterocyclic compounds	Pyridines and derivatives	Pyridinecarboxylic acids and derivatives
Glyma.08G109500	M157T70_NEG	0.586001	0.0105998	Naringenin-chalcone synthase / Flavonone synthase	(R)(-)-Allantoin	Organoheterocyclic compounds	Azolidines	Imidazolidines
Glyma.08G109500	M158T68_NEG	-0.764942	0.000217216	Naringenin-chalcone synthase / Flavonone synthase	4-Methylene-L-glutamate	Organic acids and derivatives	Carboxylic acids and derivatives	Amino acids, peptides, and analogues
Glyma.08G109500	M159T71_POS	0.63134	0.00495385	Naringenin-chalcone synthase / Flavonone synthase	Allantoin	Organoheterocyclic compounds	Azoles	Imidazoles
Glyma.08G109500	M160T70_POS	-0.523938	0.0256278	Naringenin-chalcone synthase / Flavonone synthase	Calystegine A5	Alkaloids and derivatives	Tropane alkaloids
Glyma.08G109500	M165T216_POS	-0.501272	0.0340694	Naringenin-chalcone synthase / Flavonone synthase	4-Coumarate	Phenylpropanoids and polyketides	Cinnamic acids and derivatives	Hydroxycinnamic acids and derivatives
Glyma.08G109500	M165T68_NEG	-0.538716	0.0210709	Naringenin-chalcone synthase / Flavonone synthase	Ribonic acid	Organic oxygen compounds	Organooxygen compounds	Carbohydrates and carbohydrate conjugates
Glyma.08G109500	M166T68_NEG	-0.551607	0.0176387	Naringenin-chalcone synthase / Flavonone synthase	Pyridoxal	Organoheterocyclic compounds	Pyridines and derivatives	Pyridine carboxaldehydes
Glyma.08G109500	M172T69_NEG	-0.604249	0.00790845	Naringenin-chalcone synthase / Flavonone synthase	(2S,5S)-trans-Carboxymethylproline	Organic acids and derivatives	Carboxylic acids and derivatives	Amino acids, peptides, and analogues
Glyma.08G109500	M175T68_NEG	0.551717	0.0176113	Naringenin-chalcone synthase / Flavonone synthase	Allantoate	Organic acids and derivatives	Carboxylic acids and derivatives	Amino acids, peptides, and analogues
Glyma.08G109500	M175T69_POS	-0.698824	0.00125275	Naringenin-chalcone synthase / Flavonone synthase	Calystegine N1	Alkaloids and derivatives	Tropane alkaloids
Glyma.08G109500	M176T98_POS	-0.507597	0.0315246	Naringenin-chalcone synthase / Flavonone synthase	Calystegine B4	Alkaloids and derivatives	Tropane alkaloids
Glyma.08G109500	M179T69_NEG	-0.533955	0.0224633	Naringenin-chalcone synthase / Flavonone synthase	Scyllitol	Organic oxygen compounds	Organooxygen compounds	Alcohols and polyols
Glyma.08G109500	M180T615_POS	-0.565192	0.0145159	Naringenin-chalcone synthase / Flavonone synthase	L-Homophenylalanine	Organic acids and derivatives	Carboxylic acids and derivatives	Amino acids, peptides, and analogues
Glyma.08G109500	M180T69_NEG	-0.569628	0.0135974	Naringenin-chalcone synthase / Flavonone synthase	7,8-Dihydroxanthopterin	Organoheterocyclic compounds	Pteridines and derivatives	Pterins and derivatives
Glyma.08G109500	M187T69_POS	0.606351	0.00763772	Naringenin-chalcone synthase / Flavonone synthase	3-maleylpyruvate
Glyma.08G109500	M189T72_NEG	-0.544509	0.019469	Naringenin-chalcone synthase / Flavonone synthase	Oxalosuccinate	Organic acids and derivatives	Carboxylic acids and derivatives	Tricarboxylic acids and derivatives
Glyma.08G109500	M195T67_NEG	-0.594274	0.00930104	Naringenin-chalcone synthase / Flavonone synthase	D-Gluconic acid sodium salt	Organic oxygen compounds	Organooxygen compounds	Carbohydrates and carbohydrate conjugates
Glyma.08G109500	M195T70_POS	-0.638388	0.00435541	Naringenin-chalcone synthase / Flavonone synthase	Caffeine	Organoheterocyclic compounds	Imidazopyrimidines	Purines and purine derivatives
Glyma.08G109500	M197T116_POS	-0.504841	0.0326146	Naringenin-chalcone synthase / Flavonone synthase	3-(3,4-Dihydroxyphenyl)pyruvate	Benzenoids	Benzene and substituted derivatives	Phenylpyruvic acid derivatives
Glyma.08G109500	M199T191_POS	-0.577016	0.012171	Naringenin-chalcone synthase / Flavonone synthase	7-Deoxyloganetate	Lipids and lipid-like molecules	Prenol lipids	Monoterpenoids
Glyma.08G109500	M207T68_NEG	-0.579587	0.0117035	Naringenin-chalcone synthase / Flavonone synthase	Dihydrolipoate	Lipids and lipid-like molecules	Fatty Acyls	Fatty acids and conjugates
Glyma.08G109500	M208T410_NEG	0.51013	0.0305479	Naringenin-chalcone synthase / Flavonone synthase	p-Hydroxyphenylacetylglycine	Organic acids and derivatives	Carboxylic acids and derivatives	Amino acids, peptides, and analogues
Glyma.08G109500	M209T486_POS	-0.543127	0.0198421	Naringenin-chalcone synthase / Flavonone synthase	Sinapoyl aldehyde	Benzenoids	Phenols	Methoxyphenols
Glyma.08G109500	M209T507_POS	-0.568947	0.0137353	Naringenin-chalcone synthase / Flavonone synthase	Ferulic acid methyl ester	Phenylpropanoids and polyketides	Cinnamic acids and derivatives	Hydroxycinnamic acids and derivatives
Glyma.08G109500	M215T67_NEG	-0.717236	0.000807037	Naringenin-chalcone synthase / Flavonone synthase	2-C-Methyl-D-erythritol 4-phosphate	Organic acids and derivatives	Organic phosphoric acids and derivatives	Phosphate esters
Glyma.08G109500	M217T408_NEG	-0.615071	0.00659308	Naringenin-chalcone synthase / Flavonone synthase	2-Hydroxydecanedioic acid	Organic acids and derivatives	Hydroxy acids and derivatives	Medium-chain hydroxy acids and derivatives
Glyma.08G109500	M217T482_POS	-0.511835	0.0299034	Naringenin-chalcone synthase / Flavonone synthase	5-Carboxy-2-oxohept-3-enedioate	Organic acids and derivatives	Carboxylic acids and derivatives	Tricarboxylic acids and derivatives
Glyma.08G109500	M218T408_NEG	-0.624203	0.00562632	Naringenin-chalcone synthase / Flavonone synthase	4-amino-2-methyl-5-(phosphooxymethyl)pyrimidine
Glyma.08G109500	M225T65_NEG	-0.510516	0.0304012	Naringenin-chalcone synthase / Flavonone synthase	Glucoheptonic acid	Organic oxygen compounds	Organooxygen compounds	Carbohydrates and carbohydrate conjugates
Glyma.08G109500	M226T66_NEG	-0.509445	0.0308096	Naringenin-chalcone synthase / Flavonone synthase	Arogenic acid	Organic acids and derivatives	Carboxylic acids and derivatives	Amino acids, peptides, and analogues
Glyma.08G109500	M228T72_POS	-0.563651	0.0148463	Naringenin-chalcone synthase / Flavonone synthase	5-(2'-Carboxyethyl)-4,6-dihydroxypicolinate	Organoheterocyclic compounds	Pyridines and derivatives	Pyridinecarboxylic acids and derivatives
Glyma.08G109500	M229T714_POS	-0.558528	0.0159877	Naringenin-chalcone synthase / Flavonone synthase	(R)-5-phosphomevalonate
Glyma.08G109500	M237T431_POS	-0.522231	0.0262003	Naringenin-chalcone synthase / Flavonone synthase	Capsidiol	Lipids and lipid-like molecules	Prenol lipids	Sesquiterpenoids
Glyma.08G109500	M238T70_POS	0.745153	0.000387302	Naringenin-chalcone synthase / Flavonone synthase	S-succinylcysteine	Organic acids and derivatives	Carboxylic acids and derivatives	Amino acids, peptides, and analogues
Glyma.08G109500	M239T69_NEG	-0.597951	0.00876653	Naringenin-chalcone synthase / Flavonone synthase	Lettucenin A	Organoheterocyclic compounds	Cycloheptafurans
Glyma.08G109500	M249T727_NEG	0.511023	0.0302089	Naringenin-chalcone synthase / Flavonone synthase	Viscic acid	Lipids and lipid-like molecules	Prenol lipids	Sesquiterpenoids
Glyma.08G109500	M252T410_2_NEG	0.558469	0.0160011	Naringenin-chalcone synthase / Flavonone synthase	N-Salicyloylaspartic acid	Organic acids and derivatives	Carboxylic acids and derivatives	Amino acids, peptides, and analogues
Glyma.08G109500	M253T410_NEG	0.556558	0.0164444	Naringenin-chalcone synthase / Flavonone synthase	5,7-Dihydroxyisoflavone	Phenylpropanoids and polyketides	Isoflavonoids	Isoflav-2-enes
Glyma.08G109500	M257T148_NEG	-0.583833	0.0109631	Naringenin-chalcone synthase / Flavonone synthase	Northienamycin	Organoheterocyclic compounds	Lactams	Beta lactams
Glyma.08G109500	M260T414_NEG	0.516783	0.0280934	Naringenin-chalcone synthase / Flavonone synthase	Lotaustralin	Organic oxygen compounds	Organooxygen compounds	Carbohydrates and carbohydrate conjugates
Glyma.08G109500	M261T70_NEG	-0.558371	0.0160236	Naringenin-chalcone synthase / Flavonone synthase	D-Mannitol 1-phosphate	Organic oxygen compounds	Organooxygen compounds	Carbohydrates and carbohydrate conjugates
Glyma.08G109500	M264T421_NEG	-0.583933	0.0109462	Naringenin-chalcone synthase / Flavonone synthase	Thiamine	Organoheterocyclic compounds	Diazines	Pyrimidines and pyrimidine derivatives
Glyma.08G109500	M267T68_NEG	-0.672856	0.00221334	Naringenin-chalcone synthase / Flavonone synthase	2-O-(alpha-D-Mannosyl)-D-glycerate	Lipids and lipid-like molecules	Fatty Acyls	Fatty acyl glycosides
Glyma.08G109500	M269T389_NEG	0.586773	0.0104727	Naringenin-chalcone synthase / Flavonone synthase	4',6,7-Trihydroxyisoflavone	Phenylpropanoids and polyketides	Isoflavonoids	Isoflav-2-enes
Glyma.08G109500	M273T388_POS	-0.61718	0.00635874	Naringenin-chalcone synthase / Flavonone synthase	Deoxyshikonin	Benzenoids	Naphthalenes	Naphthoquinones
Glyma.08G109500	M285T253_NEG	0.51965	0.0270842	Naringenin-chalcone synthase / Flavonone synthase	Salicin	Organic oxygen compounds	Organooxygen compounds	Carbohydrates and carbohydrate conjugates
Glyma.08G109500	M295T101_NEG	-0.5535	0.0171742	Naringenin-chalcone synthase / Flavonone synthase	3,3'-Bi-1H-indole-5,5',6,6'-tetrol	Organoheterocyclic compounds	Indoles and derivatives	Hydroxyindoles
Glyma.08G109500	M295T417_NEG	-0.607578	0.00748307	Naringenin-chalcone synthase / Flavonone synthase	Dehypoxanthine futalosine	Organic oxygen compounds	Organooxygen compounds	Carbonyl compounds
Glyma.08G109500	M298T403_NEG	-0.514802	0.0288076	Naringenin-chalcone synthase / Flavonone synthase	Caffeoyl tyramine	Phenylpropanoids and polyketides	Cinnamic acids and derivatives	Hydroxycinnamic acids and derivatives
Glyma.08G109500	M301T503_POS	-0.516445	0.0282144	Naringenin-chalcone synthase / Flavonone synthase	Astraciceran	Phenylpropanoids and polyketides	Isoflavonoids	O-methylated isoflavonoids
Glyma.08G109500	M305T440_POS	0.511243	0.030126	Naringenin-chalcone synthase / Flavonone synthase	Nopaline	Organic acids and derivatives	Carboxylic acids and derivatives	Amino acids, peptides, and analogues
Glyma.08G109500	M308T421_POS	-0.678011	0.00198551	Naringenin-chalcone synthase / Flavonone synthase	Dihydroascorbigen	Organoheterocyclic compounds	Indoles and derivatives	Indoles
Glyma.08G109500	M315T477_POS	-0.513272	0.0293689	Naringenin-chalcone synthase / Flavonone synthase	Dihydropteroate	Organoheterocyclic compounds	Pteridines and derivatives	Pterins and derivatives
Glyma.08G109500	M317T109_POS	0.539755	0.0207761	Naringenin-chalcone synthase / Flavonone synthase	Gibberellin A9	Lipids and lipid-like molecules	Prenol lipids	Diterpenoids
Glyma.08G109500	M319T453_POS	-0.527318	0.0245235	Naringenin-chalcone synthase / Flavonone synthase	[3aR-(3aalpha,4alpha,9aalpha,9bbeta)]-4-(Acetyloxy)-3,3a,4,5,9a,9b-hexahydro-9-(hydroxymethyl)-6-methyl-3-methylene-azuleno[4,5-b]furan-2,7-dione	Organoheterocyclic compounds	Lactones	Gamma butyrolactones
Glyma.08G109500	M320T682_POS	-0.50649	0.0319589	Naringenin-chalcone synthase / Flavonone synthase	Norfloxacin	Organoheterocyclic compounds	Quinolines and derivatives	Quinoline carboxylic acids
Glyma.08G109500	M322T702_NEG	0.592383	0.00958595	Naringenin-chalcone synthase / Flavonone synthase	(-)-Jasmonoyl-L-isoleucine	Organic acids and derivatives	Carboxylic acids and derivatives	Amino acids, peptides, and analogues
Glyma.08G109500	M323T538_POS	-0.511935	0.0298661	Naringenin-chalcone synthase / Flavonone synthase	N-((R)-Pantothenoyl)-L-cysteine	Organic acids and derivatives	Peptidomimetics	Hybrid peptides
Glyma.08G109500	M329T336_POS	-0.539158	0.0209452	Naringenin-chalcone synthase / Flavonone synthase	Oxanordentatin	Phenylpropanoids and polyketides	Coumarins and derivatives	Pyranocoumarins
Glyma.08G109500	M338T243_POS	-0.520285	0.0268647	Naringenin-chalcone synthase / Flavonone synthase	Dihydroneoascorbigen	Organoheterocyclic compounds	Indoles and derivatives	Indoles
Glyma.08G109500	M339T419_POS	-0.593966	0.00934698	Naringenin-chalcone synthase / Flavonone synthase	1-Caffeoyl-4-deoxyquinic acid	Phenylpropanoids and polyketides	Cinnamic acids and derivatives	Hydroxycinnamic acids and derivatives
Glyma.08G109500	M341T538_POS	-0.527309	0.0245265	Naringenin-chalcone synthase / Flavonone synthase	Desmethylxanthohumol	Phenylpropanoids and polyketides	Linear 1,3-diarylpropanoids	Chalcones and dihydrochalcones
Glyma.08G109500	M343T466_POS	-0.598632	0.00867023	Naringenin-chalcone synthase / Flavonone synthase	5,7,3',4'-Tetramethoxyflavone	Phenylpropanoids and polyketides	Flavonoids	O-methylated flavonoids
Glyma.08G109500	M357T605_POS	-0.520545	0.0267751	Naringenin-chalcone synthase / Flavonone synthase	Pluviatilol	Lignans, neolignans and related compounds	Furanoid lignans
Glyma.08G109500	M358T537_POS	-0.509237	0.0308894	Naringenin-chalcone synthase / Flavonone synthase	p-chloromercuribenzoate
Glyma.08G109500	M359T291_POS	-0.548647	0.0183847	Naringenin-chalcone synthase / Flavonone synthase	10-Deoxygeniposidic acid	Lipids and lipid-like molecules	Prenol lipids	Terpene glycosides
Glyma.08G109500	M359T442_POS	-0.501898	0.0338105	Naringenin-chalcone synthase / Flavonone synthase	Matairesinol	Lignans, neolignans and related compounds	Furanoid lignans	Tetrahydrofuran lignans
Glyma.08G109500	M360T70_NEG	-0.518709	0.0274122	Naringenin-chalcone synthase / Flavonone synthase	Glucoputranjivin	Organic oxygen compounds	Organooxygen compounds	Carbohydrates and carbohydrate conjugates
Glyma.08G109500	M361T191_POS	-0.626897	0.00536426	Naringenin-chalcone synthase / Flavonone synthase	7-Deoxyloganate	Lipids and lipid-like molecules	Prenol lipids	Terpene glycosides
Glyma.08G109500	M363T922_NEG	0.66558	0.00257119	Naringenin-chalcone synthase / Flavonone synthase	XMP
Glyma.08G109500	M369T551_POS	-0.589294	0.0100665	Naringenin-chalcone synthase / Flavonone synthase	9-O-Methylglyceofuran	Phenylpropanoids and polyketides	Isoflavonoids	Furanoisoflavonoids
Glyma.08G109500	M374T190_POS	-0.599114	0.00860268	Naringenin-chalcone synthase / Flavonone synthase	DIMBOA glucoside	Organic oxygen compounds	Organooxygen compounds	Carbohydrates and carbohydrate conjugates
Glyma.08G109500	M374T69_NEG	-0.515333	0.028615	Naringenin-chalcone synthase / Flavonone synthase	Glucocochlearin	Organic oxygen compounds	Organooxygen compounds	Carbohydrates and carbohydrate conjugates
Glyma.08G109500	M375T507_POS	-0.548517	0.018418	Naringenin-chalcone synthase / Flavonone synthase	5,7,2',3',4'-Pentamethoxyflavanone	Phenylpropanoids and polyketides	Flavonoids	O-methylated flavonoids
Glyma.08G109500	M386T608_POS	-0.61584	0.00650686	Naringenin-chalcone synthase / Flavonone synthase	Nocardicin G	Organic acids and derivatives	Carboxylic acids and derivatives	Amino acids, peptides, and analogues
Glyma.08G109500	M389T557_POS	-0.567659	0.0139993	Naringenin-chalcone synthase / Flavonone synthase	(+-)-Strigol acetate	Lipids and lipid-like molecules	Prenol lipids	Terpene lactones
Glyma.08G109500	M391T99_NEG	0.545212	0.0192812	Naringenin-chalcone synthase / Flavonone synthase	Epithienamycin E	Organoheterocyclic compounds	Lactams	Beta lactams
Glyma.08G109500	M393T495_POS	-0.54519	0.0192872	Naringenin-chalcone synthase / Flavonone synthase	Cucumegastigmane II	Lipids and lipid-like molecules	Fatty Acyls	Fatty acyl glycosides
Glyma.08G109500	M405T528_POS	-0.517183	0.027951	Naringenin-chalcone synthase / Flavonone synthase	UDP
Glyma.08G109500	M411T115_POS	-0.639045	0.00430282	Naringenin-chalcone synthase / Flavonone synthase	N1-p-Coumaroyl-N4-feruloylputrescine	Phenylpropanoids and polyketides	Cinnamic acids and derivatives	Hydroxycinnamic acids and derivatives
Glyma.08G109500	M457T431_POS	-0.608679	0.00734664	Naringenin-chalcone synthase / Flavonone synthase	Phytyl pyrophosphate	Lipids and lipid-like molecules	Prenol lipids	Diterpenoids
Glyma.08G109500	M459T697_POS	-0.508872	0.0310299	Naringenin-chalcone synthase / Flavonone synthase	Soyasapogenol B	Lipids and lipid-like molecules	Prenol lipids	Triterpenoids
Glyma.08G109500	M461T439_NEG	0.813101	4.08799e-05	Naringenin-chalcone synthase / Flavonone synthase	gamma-L-Glutamyl-S-(hercyn-2-yl)-L-cysteine S-oxide	Organic acids and derivatives	Carboxylic acids and derivatives	Amino acids, peptides, and analogues
Glyma.08G109500	M487T499_NEG	-0.509372	0.0308377	Naringenin-chalcone synthase / Flavonone synthase	Ichangin	Lipids and lipid-like molecules	Prenol lipids	Terpene lactones
Glyma.08G109500	M487T512_POS	-0.53245	0.022918	Naringenin-chalcone synthase / Flavonone synthase	Sudachinoid C	Lipids and lipid-like molecules	Prenol lipids	Triterpenoids
Glyma.08G109500	M519T598_POS	-0.523794	0.0256757	Naringenin-chalcone synthase / Flavonone synthase	Gossypol	Lipids and lipid-like molecules	Prenol lipids	Sesquiterpenoids
Glyma.08G109500	M547T141_NEG	-0.54446	0.019482	Naringenin-chalcone synthase / Flavonone synthase	Neobetanin	Organic oxygen compounds	Organooxygen compounds	Carbohydrates and carbohydrate conjugates
Glyma.08G109500	M547T237_NEG	-0.570877	0.0133474	Naringenin-chalcone synthase / Flavonone synthase	Kunzeaphlogin F	Organic oxygen compounds	Organooxygen compounds	Carbohydrates and carbohydrate conjugates
Glyma.08G109500	M611T637_POS	-0.58003	0.0116244	Naringenin-chalcone synthase / Flavonone synthase	Divinylprotochlorophyllide
Glyma.08G109500	M613T608_NEG	0.535545	0.0219905	Naringenin-chalcone synthase / Flavonone synthase	Neomycin B	Organic oxygen compounds	Organooxygen compounds	Carbohydrates and carbohydrate conjugates
Glyma.08G109500	M685T550_POS	-0.536062	0.0218385	Naringenin-chalcone synthase / Flavonone synthase	Clemastanin B
Glyma.08G109500	M723T627_NEG	-0.509288	0.0308698	Naringenin-chalcone synthase / Flavonone synthase	Torvonin A	Lipids and lipid-like molecules	Steroids and steroid derivatives	Steroidal glycosides
Glyma.08G109500	M781T537_NEG	-0.628102	0.00525028	Naringenin-chalcone synthase / Flavonone synthase	Ansamitocinoside P-3	Lipids and lipid-like molecules	Fatty Acyls	Fatty acyl glycosides
Glyma.08G109500	M799T417_NEG	-0.618262	0.00624104	Naringenin-chalcone synthase / Flavonone synthase	6'''-O-Sinapoylsaponarin	Phenylpropanoids and polyketides	Flavonoids	Flavonoid glycosides
Glyma.08G109500	M852T507_POS	-0.518781	0.0273871	Naringenin-chalcone synthase / Flavonone synthase	3-demethylubiquinol-10
Glyma.08G109500	M90T68_POS	0.572896	0.0129509	Naringenin-chalcone synthase / Flavonone synthase	beta-Alanine	Organic acids and derivatives	Carboxylic acids and derivatives	Amino acids, peptides, and analogues
Glyma.08G109500	M974T533_3_POS	0.572995	0.0129317	Naringenin-chalcone synthase / Flavonone synthase	Sinapoyl-CoA	Lipids and lipid-like molecules	Fatty Acyls	Fatty acyl thioesters
Glyma.08G110300	M151T936_POS	0.619457	0.00611324	Naringenin-chalcone synthase / Flavonone synthase	alpha-Oxo-benzeneacetic acid	Benzenoids	Benzene and substituted derivatives	Benzoyl derivatives
Glyma.08G110300	M159T709_POS	0.51058	0.0303766	Naringenin-chalcone synthase / Flavonone synthase	2-isopropylmaleate
Glyma.08G110300	M170T1011_POS	0.597857	0.00877988	Naringenin-chalcone synthase / Flavonone synthase	L-Selenocysteine	Organic acids and derivatives	Carboxylic acids and derivatives	Amino acids, peptides, and analogues
Glyma.08G110300	M180T615_POS	-0.713825	0.000877709	Naringenin-chalcone synthase / Flavonone synthase	L-Homophenylalanine	Organic acids and derivatives	Carboxylic acids and derivatives	Amino acids, peptides, and analogues
Glyma.08G110300	M296T64_POS	-0.54205	0.0201366	Naringenin-chalcone synthase / Flavonone synthase	Aminoimidazole ribotide	Organic oxygen compounds	Organooxygen compounds	Carbohydrates and carbohydrate conjugates
Glyma.08G110300	M461T439_NEG	0.539632	0.0208109	Naringenin-chalcone synthase / Flavonone synthase	gamma-L-Glutamyl-S-(hercyn-2-yl)-L-cysteine S-oxide	Organic acids and derivatives	Carboxylic acids and derivatives	Amino acids, peptides, and analogues
Glyma.08G110300	M602T224_POS	0.557353	0.0162589	Naringenin-chalcone synthase / Flavonone synthase	2-phospho-4-(cytidine 5-diphospho)-2-C-methyl-D-erythritol
Glyma.08G110420	M1046T649_NEG	0.629896	0.00508434	Naringenin-chalcone synthase / Flavonone synthase	Solanigroside H	Lipids and lipid-like molecules	Steroids and steroid derivatives	Steroidal glycosides
Glyma.08G110420	M111T68_NEG	0.622646	0.00578245	Naringenin-chalcone synthase / Flavonone synthase	Hydroxymethylphosphonate	Organic acids and derivatives	Organic phosphonic acids and derivatives	Organic phosphonic acids
Glyma.08G110420	M151T762_POS	0.540375	0.0206017	Naringenin-chalcone synthase / Flavonone synthase	Thymol	Lipids and lipid-like molecules	Prenol lipids	Monoterpenoids
Glyma.08G110420	M166T69_POS	0.515789	0.02845	Naringenin-chalcone synthase / Flavonone synthase	Methioninesulfoxide	Organic acids and derivatives	Carboxylic acids and derivatives	Amino acids, peptides, and analogues
Glyma.08G110420	M169T761_POS	0.635613	0.00458356	Naringenin-chalcone synthase / Flavonone synthase	6-Hydroxy-2,6-dimethyl-2,7-octadien-4-one	Lipids and lipid-like molecules	Prenol lipids	Monoterpenoids
Glyma.08G110420	M173T421_NEG	-0.636937	0.00447354	Naringenin-chalcone synthase / Flavonone synthase	Suberic acid	Lipids and lipid-like molecules	Fatty Acyls	Fatty acids and conjugates
Glyma.08G110420	M202T342_NEG	0.882888	1.22463e-06	Naringenin-chalcone synthase / Flavonone synthase	N6-(Delta2-Isopentenyl)-adenine	Organoheterocyclic compounds	Imidazopyrimidines	Purines and purine derivatives
Glyma.08G110420	M240T875_POS	0.795724	7.8504e-05	Naringenin-chalcone synthase / Flavonone synthase	(6R)-L-erythro-6,7-dihydrobiopterin
Glyma.08G110420	M247T307_POS	0.663852	0.00266282	Naringenin-chalcone synthase / Flavonone synthase	Hassanon	Phenylpropanoids and polyketides	Coumarins and derivatives
Glyma.08G110420	M252T566_NEG	0.881945	1.30172e-06	Naringenin-chalcone synthase / Flavonone synthase	Neopterin	Organoheterocyclic compounds	Pteridines and derivatives	Pterins and derivatives
Glyma.08G110420	M261T304_POS	0.656727	0.0030695	Naringenin-chalcone synthase / Flavonone synthase	Lacinilene C 7-methyl ether	Lipids and lipid-like molecules	Prenol lipids	Sesquiterpenoids
Glyma.08G110420	M267T68_NEG	0.506146	0.0320948	Naringenin-chalcone synthase / Flavonone synthase	2-O-(alpha-D-Mannosyl)-D-glycerate	Lipids and lipid-like molecules	Fatty Acyls	Fatty acyl glycosides
Glyma.08G110420	M277T796_POS	0.652833	0.00331243	Naringenin-chalcone synthase / Flavonone synthase	Dehydrocrepenynic acid	Lipids and lipid-like molecules	Fatty Acyls	Fatty acids and conjugates
Glyma.08G110420	M279T781_POS	0.535882	0.0218912	Naringenin-chalcone synthase / Flavonone synthase	?-linolenic acid	Lipids and lipid-like molecules	Fatty Acyls	Lineolic acids and derivatives
Glyma.08G110420	M291T743_POS	0.642926	0.0040024	Naringenin-chalcone synthase / Flavonone synthase	Deoxy phytoprostane J1	Lipids and lipid-like molecules	Fatty Acyls	Eicosanoids
Glyma.08G110420	M295T796_POS	0.673286	0.00219352	Naringenin-chalcone synthase / Flavonone synthase	Colneleic acid	Lipids and lipid-like molecules	Fatty Acyls	Fatty acids and conjugates
Glyma.08G110420	M305T814_POS	0.66521	0.00259061	Naringenin-chalcone synthase / Flavonone synthase	3-Acetoxy-9-heptadecene-4,6-diyn-8-ol.	Lipids and lipid-like molecules	Fatty Acyls	Fatty alcohol esters
Glyma.08G110420	M327T663_POS	0.517743	0.0277525	Naringenin-chalcone synthase / Flavonone synthase	2,3-Dinor-8-iso prostaglandin F2alpha	Lipids and lipid-like molecules	Fatty Acyls	Eicosanoids
Glyma.08G110420	M329T783_POS	0.68978	0.00153719	Naringenin-chalcone synthase / Flavonone synthase	(4Z,7Z,10Z,13Z,16Z,19Z)-Docosahexaenoic acid	Lipids and lipid-like molecules	Fatty Acyls	Fatty acids and conjugates
Glyma.08G110420	M339T441_POS	0.50319	0.0332814	Naringenin-chalcone synthase / Flavonone synthase	Anomaluol
Glyma.08G110420	M345T861_POS	0.620292	0.00602516	Naringenin-chalcone synthase / Flavonone synthase	SB 205607	Organoheterocyclic compounds	Quinolines and derivatives	Phenylquinolines
Glyma.08G110420	M346T860_POS	0.561086	0.0154094	Naringenin-chalcone synthase / Flavonone synthase	cyclic pyranopterin phosphate
Glyma.08G110420	M350T742_POS	0.631445	0.0049444	Naringenin-chalcone synthase / Flavonone synthase	1-(2-carboxyphenylamino)-1-deoxy-D-ribulose 5-phosphate
Glyma.08G110420	M360T70_NEG	0.593667	0.0093917	Naringenin-chalcone synthase / Flavonone synthase	Glucoputranjivin	Organic oxygen compounds	Organooxygen compounds	Carbohydrates and carbohydrate conjugates
Glyma.08G110420	M374T69_NEG	0.646522	0.0037395	Naringenin-chalcone synthase / Flavonone synthase	Glucocochlearin	Organic oxygen compounds	Organooxygen compounds	Carbohydrates and carbohydrate conjugates
Glyma.08G110420	M464T926_POS	0.837273	1.46383e-05	Naringenin-chalcone synthase / Flavonone synthase	Peonidin-3-galactoside	Phenylpropanoids and polyketides	Flavonoids	Flavonoid glycosides
Glyma.08G110420	M465T634_NEG	0.554283	0.016985	Naringenin-chalcone synthase / Flavonone synthase	Cephaeline	Alkaloids and derivatives	Emetine alkaloids	NA
Glyma.08G110420	M499T80_POS	0.597799	0.00878815	Naringenin-chalcone synthase / Flavonone synthase	Bis-gamma-glutamylcystine	Organic acids and derivatives	Carboxylic acids and derivatives	Amino acids, peptides, and analogues
Glyma.08G110420	M611T488_POS	0.68372	0.00175618	Naringenin-chalcone synthase / Flavonone synthase	Kaempferol 3,7-di-O-glucoside	Phenylpropanoids and polyketides	Flavonoids	Flavonoid glycosides
Glyma.08G110420	M665T480_NEG	0.546114	0.0190426	Naringenin-chalcone synthase / Flavonone synthase	Stachyose	Organic oxygen compounds	Organooxygen compounds	Carbohydrates and carbohydrate conjugates
Glyma.08G110420	M772T402_POS	0.633341	0.00477748	Naringenin-chalcone synthase / Flavonone synthase	Peonidin 3-rutinoside-5-glucoside
Glyma.08G110460	M101T95_NEG	-0.597741	0.00879639	Naringenin-chalcone synthase / Flavonone synthase	2-Ketobutyric acid	Organic acids and derivatives	Keto acids and derivatives	Short-chain keto acids and derivatives
Glyma.08G110460	M102T71_POS	0.739335	0.000454674	Naringenin-chalcone synthase / Flavonone synthase	1-Aminocyclopropane-1-carboxylate	Organic acids and derivatives	Carboxylic acids and derivatives	Amino acids, peptides, and analogues
Glyma.08G110460	M104T65_NEG	0.890666	7.24824e-07	Naringenin-chalcone synthase / Flavonone synthase	Serine	Organic acids and derivatives	Carboxylic acids and derivatives	Amino acids, peptides, and analogues
Glyma.08G110460	M106T70_POS	0.910856	1.51137e-07	Naringenin-chalcone synthase / Flavonone synthase	L-Serine	Organic acids and derivatives	Carboxylic acids and derivatives	Amino acids, peptides, and analogues
Glyma.08G110460	M113T68_NEG	0.687371	0.00162137	Naringenin-chalcone synthase / Flavonone synthase	2-Hydroxy-2,4-pentadienoate	Lipids and lipid-like molecules	Fatty Acyls	Fatty acids and conjugates
Glyma.08G110460	M115T75_NEG	-0.698343	0.00126668	Naringenin-chalcone synthase / Flavonone synthase	Maleic acid	Organic acids and derivatives	Carboxylic acids and derivatives	Dicarboxylic acids and derivatives
Glyma.08G110460	M118T66_NEG	0.515448	0.0285733	Naringenin-chalcone synthase / Flavonone synthase	L-Allothreonine	Organic acids and derivatives	Carboxylic acids and derivatives	Amino acids, peptides, and analogues
Glyma.08G110460	M118T73_POS	0.637341	0.00444035	Naringenin-chalcone synthase / Flavonone synthase	VALINE	Organic acids and derivatives	Carboxylic acids and derivatives	Amino acids, peptides, and analogues
Glyma.08G110460	M119T67_NEG	-0.529784	0.0237414	Naringenin-chalcone synthase / Flavonone synthase	3,4-Dihydroxybutanoic acid	Organic acids and derivatives	Hydroxy acids and derivatives	Beta hydroxy acids and derivatives
Glyma.08G110460	M125T71_POS	0.567085	0.014118	Naringenin-chalcone synthase / Flavonone synthase	Methylimidazole acetaldehyde	Organoheterocyclic compounds	Azoles	Imidazoles
Glyma.08G110460	M130T68_POS	0.66497	0.00260323	Naringenin-chalcone synthase / Flavonone synthase	5-Oxoproline	Organic acids and derivatives	Carboxylic acids and derivatives	Amino acids, peptides, and analogues
Glyma.08G110460	M138T69_POS	0.524355	0.0254897	Naringenin-chalcone synthase / Flavonone synthase	N-methylnicotinate	Alkaloids and derivatives	NA	NA
Glyma.08G110460	M142T67_POS	0.616684	0.00641318	Naringenin-chalcone synthase / Flavonone synthase	carbamoyl phosphate
Glyma.08G110460	M147T69_POS	0.662397	0.00274205	Naringenin-chalcone synthase / Flavonone synthase	L-Glutamine	Organic acids and derivatives	Carboxylic acids and derivatives	Amino acids, peptides, and analogues
Glyma.08G110460	M150T929_NEG	0.54875	0.0183584	Naringenin-chalcone synthase / Flavonone synthase	2-Benzothiazolinone	Organoheterocyclic compounds	Benzothiazoles
Glyma.08G110460	M157T70_NEG	0.70601	0.00105923	Naringenin-chalcone synthase / Flavonone synthase	(R)(-)-Allantoin	Organoheterocyclic compounds	Azolidines	Imidazolidines
Glyma.08G110460	M158T107_NEG	0.6438	0.00393711	Naringenin-chalcone synthase / Flavonone synthase	5-Acetamidopentanoate	Lipids and lipid-like molecules	Fatty Acyls	Fatty acids and conjugates
Glyma.08G110460	M159T71_POS	0.56662	0.0142151	Naringenin-chalcone synthase / Flavonone synthase	Allantoin	Organoheterocyclic compounds	Azoles	Imidazoles
Glyma.08G110460	M172T298_POS	0.634722	0.00465887	Naringenin-chalcone synthase / Flavonone synthase	N-Butanoylhomoserine lactone	Organic acids and derivatives	Carboxylic acids and derivatives	Amino acids, peptides, and analogues
Glyma.08G110460	M172T390_NEG	0.508045	0.0313501	Naringenin-chalcone synthase / Flavonone synthase	5-Guanidino-2-oxopentanoate	Organic acids and derivatives	Keto acids and derivatives	Short-chain keto acids and derivatives
Glyma.08G110460	M173T421_NEG	0.659706	0.00289366	Naringenin-chalcone synthase / Flavonone synthase	Suberic acid	Lipids and lipid-like molecules	Fatty Acyls	Fatty acids and conjugates
Glyma.08G110460	M175T68_NEG	0.566668	0.014205	Naringenin-chalcone synthase / Flavonone synthase	Allantoate	Organic acids and derivatives	Carboxylic acids and derivatives	Amino acids, peptides, and analogues
Glyma.08G110460	M185T66_POS	0.798199	7.18111e-05	Naringenin-chalcone synthase / Flavonone synthase	5-Hydroxyisourate	Organoheterocyclic compounds	Imidazopyrimidines	Purines and purine derivatives
Glyma.08G110460	M186T66_POS	0.841689	1.19204e-05	Naringenin-chalcone synthase / Flavonone synthase	2-Amino-3-carboxymuconate semialdehyde	Organic acids and derivatives	Carboxylic acids and derivatives	Amino acids, peptides, and analogues
Glyma.08G110460	M187T69_POS	0.691484	0.00147985	Naringenin-chalcone synthase / Flavonone synthase	3-maleylpyruvate
Glyma.08G110460	M201T74_POS	0.672884	0.00221204	Naringenin-chalcone synthase / Flavonone synthase	D-erythrose 4-phosphate
Glyma.08G110460	M215T194_POS	0.583222	0.0110673	Naringenin-chalcone synthase / Flavonone synthase	Dethiobiotin	Lipids and lipid-like molecules	Fatty Acyls	Fatty acids and conjugates
Glyma.08G110460	M216T376_NEG	0.564533	0.0146565	Naringenin-chalcone synthase / Flavonone synthase	N-Acetyl-L-citrulline	Organic acids and derivatives	Carboxylic acids and derivatives	Amino acids, peptides, and analogues
Glyma.08G110460	M237T724_POS	0.55386	0.017087	Naringenin-chalcone synthase / Flavonone synthase	Aubergenone	Lipids and lipid-like molecules	Prenol lipids	Sesquiterpenoids
Glyma.08G110460	M238T70_POS	0.699435	0.00123524	Naringenin-chalcone synthase / Flavonone synthase	S-succinylcysteine	Organic acids and derivatives	Carboxylic acids and derivatives	Amino acids, peptides, and analogues
Glyma.08G110460	M269T389_NEG	0.529314	0.0238891	Naringenin-chalcone synthase / Flavonone synthase	4',6,7-Trihydroxyisoflavone	Phenylpropanoids and polyketides	Isoflavonoids	Isoflav-2-enes
Glyma.08G110460	M273T639_POS	0.590957	0.00980543	Naringenin-chalcone synthase / Flavonone synthase	Naringenin chalcone	Phenylpropanoids and polyketides	Linear 1,3-diarylpropanoids	Chalcones and dihydrochalcones
Glyma.08G110460	M288T742_POS	0.682054	0.00182071	Naringenin-chalcone synthase / Flavonone synthase	Lauryl diethanolamide	Lipids and lipid-like molecules	Fatty Acyls	Fatty amides
Glyma.08G110460	M298T830_POS	0.578088	0.0119743	Naringenin-chalcone synthase / Flavonone synthase	N7-methylguanosine
Glyma.08G110460	M302T722_POS	0.591707	0.00968948	Naringenin-chalcone synthase / Flavonone synthase	CIF 3
Glyma.08G110460	M303T888_POS	0.877727	1.70015e-06	Naringenin-chalcone synthase / Flavonone synthase	(3R,4R)-3-(6-hydroxy-1,3-benzodioxol-5-yl)-3,4-dihydro-2H-chromene-4,7-diol
Glyma.08G110460	M309T463_NEG	0.55712	0.0163131	Naringenin-chalcone synthase / Flavonone synthase	Sinapine	Phenylpropanoids and polyketides	Cinnamic acids and derivatives	Hydroxycinnamic acids and derivatives
Glyma.08G110460	M315T416_POS	0.549378	0.0181981	Naringenin-chalcone synthase / Flavonone synthase	6-O-Acetylarbutin	Organic oxygen compounds	Organooxygen compounds	Carbohydrates and carbohydrate conjugates
Glyma.08G110460	M322T702_NEG	0.536573	0.021689	Naringenin-chalcone synthase / Flavonone synthase	(-)-Jasmonoyl-L-isoleucine	Organic acids and derivatives	Carboxylic acids and derivatives	Amino acids, peptides, and analogues
Glyma.08G110460	M331T724_POS	0.511257	0.0301208	Naringenin-chalcone synthase / Flavonone synthase	(7Z,10Z,13Z,16Z,19Z)-Docosapentaenoic acid	Lipids and lipid-like molecules	Fatty Acyls	Fatty acids and conjugates
Glyma.08G110460	M336T913_POS	0.912641	1.29302e-07	Naringenin-chalcone synthase / Flavonone synthase	N4-(beta-N-acetyl-D-glucosaminyl)-L-asparagine
Glyma.08G110460	M338T700_POS	0.714631	0.00086056	Naringenin-chalcone synthase / Flavonone synthase	5-Hydroxymethyldeoxycytidylate	Nucleosides, nucleotides, and analogues	Pyrimidine nucleotides	Pyrimidine deoxyribonucleotides
Glyma.08G110460	M347T786_POS	0.729295	0.000594033	Naringenin-chalcone synthase / Flavonone synthase	Corticosterone	Lipids and lipid-like molecules	Steroids and steroid derivatives	Hydroxysteroids
Glyma.08G110460	M363T910_POS	0.919889	6.61917e-08	Naringenin-chalcone synthase / Flavonone synthase	3,6,9,12-Tetraoxatetracosan-1-ol	Organic oxygen compounds	Organooxygen compounds	Ethers
Glyma.08G110460	M363T922_NEG	0.837113	1.4746e-05	Naringenin-chalcone synthase / Flavonone synthase	XMP
Glyma.08G110460	M391T699_NEG	0.671201	0.00229086	Naringenin-chalcone synthase / Flavonone synthase	5-O-Demethylnobiletin
Glyma.08G110460	M417T438_POS	0.619809	0.00607597	Naringenin-chalcone synthase / Flavonone synthase	Daidzein-8-C-glucoside	Phenylpropanoids and polyketides	Isoflavonoids	Isoflavonoid C-glycosides
Glyma.08G110460	M430T906_POS	0.926468	3.40619e-08	Naringenin-chalcone synthase / Flavonone synthase	15alpha-Hydroxysolasodine	Lipids and lipid-like molecules	Steroids and steroid derivatives	Steroidal alkaloids
Glyma.08G110460	M433T374_POS	0.609765	0.00721394	Naringenin-chalcone synthase / Flavonone synthase	Apigenin-7-O-glucoside	Phenylpropanoids and polyketides	Flavonoids	Flavonoid glycosides
Glyma.08G110460	M435T443_POS	0.609241	0.00727761	Naringenin-chalcone synthase / Flavonone synthase	Reynoutrin	Phenylpropanoids and polyketides	Flavonoids	Flavonoid glycosides
Glyma.08G110460	M461T439_NEG	0.520786	0.0266922	Naringenin-chalcone synthase / Flavonone synthase	gamma-L-Glutamyl-S-(hercyn-2-yl)-L-cysteine S-oxide	Organic acids and derivatives	Carboxylic acids and derivatives	Amino acids, peptides, and analogues
Glyma.08G110460	M471T243_NEG	0.944371	3.87007e-09	Naringenin-chalcone synthase / Flavonone synthase	Hassmarin	Phenylpropanoids and polyketides	Coumarins and derivatives	Pyranocoumarins
Glyma.08G110460	M613T608_NEG	0.590224	0.00991981	Naringenin-chalcone synthase / Flavonone synthase	Neomycin B	Organic oxygen compounds	Organooxygen compounds	Carbohydrates and carbohydrate conjugates
Glyma.08G110460	M629T490_NEG	0.752003	0.000318931	Naringenin-chalcone synthase / Flavonone synthase	GDP-4-acetamido-4,6-dideoxy-alpha-D-mannose	Nucleosides, nucleotides, and analogues	Purine nucleotides	Purine nucleotide sugars
Glyma.08G110460	M640T413_POS	0.812398	4.20272e-05	Naringenin-chalcone synthase / Flavonone synthase	Demethyl-desacetyl-rifamycin S	Phenylpropanoids and polyketides	Macrolactams	NA
Glyma.08G110460	M74T103_POS	0.621914	0.00585707	Naringenin-chalcone synthase / Flavonone synthase	N,N-Dimethylformamide	Organic acids and derivatives	Carboxylic acids and derivatives	Carboxylic acid derivatives
Glyma.08G110460	M883T701_NEG	0.657771	0.00300688	Naringenin-chalcone synthase / Flavonone synthase	Pennogenin 3-O-beta-chacotrioside	Lipids and lipid-like molecules	Steroids and steroid derivatives	Steroidal glycosides
Glyma.08G110460	M88T67_NEG	0.510708	0.0303282	Naringenin-chalcone synthase / Flavonone synthase	L-Alanine	Organic acids and derivatives	Carboxylic acids and derivatives	Amino acids, peptides, and analogues
Glyma.08G110460	M90T68_POS	0.855053	6.15345e-06	Naringenin-chalcone synthase / Flavonone synthase	beta-Alanine	Organic acids and derivatives	Carboxylic acids and derivatives	Amino acids, peptides, and analogues
Glyma.08G110460	M974T533_3_POS	0.614952	0.00660652	Naringenin-chalcone synthase / Flavonone synthase	Sinapoyl-CoA	Lipids and lipid-like molecules	Fatty Acyls	Fatty acyl thioesters
Glyma.08G110500	M1002T341_3_POS	-0.607979	0.00743313	Naringenin-chalcone synthase / Flavonone synthase	3-Oxo-OPC4-CoA	Lipids and lipid-like molecules	Fatty Acyls	Fatty acyl thioesters
Glyma.08G110500	M101T73_POS	-0.544954	0.0193501	Naringenin-chalcone synthase / Flavonone synthase	Tiglic acid	Lipids and lipid-like molecules	Fatty Acyls	Fatty acids and conjugates
Glyma.08G110500	M102T71_POS	0.866128	3.37932e-06	Naringenin-chalcone synthase / Flavonone synthase	1-Aminocyclopropane-1-carboxylate	Organic acids and derivatives	Carboxylic acids and derivatives	Amino acids, peptides, and analogues
Glyma.08G110500	M1038T707_NEG	0.667848	0.00245486	Naringenin-chalcone synthase / Flavonone synthase	Soyasaponin betaa
Glyma.08G110500	M104T65_NEG	0.690834	0.0015015	Naringenin-chalcone synthase / Flavonone synthase	Serine	Organic acids and derivatives	Carboxylic acids and derivatives	Amino acids, peptides, and analogues
Glyma.08G110500	M105T67_POS	0.623459	0.00570052	Naringenin-chalcone synthase / Flavonone synthase	(S)-3-hydroxy-isobutanoate
Glyma.08G110500	M105T71_NEG	0.641512	0.0041098	Naringenin-chalcone synthase / Flavonone synthase	Glyceric acid	Organic oxygen compounds	Organooxygen compounds	Carbohydrates and carbohydrate conjugates
Glyma.08G110500	M106T70_POS	0.679564	0.00192082	Naringenin-chalcone synthase / Flavonone synthase	L-Serine	Organic acids and derivatives	Carboxylic acids and derivatives	Amino acids, peptides, and analogues
Glyma.08G110500	M107T125_POS	0.711908	0.000919632	Naringenin-chalcone synthase / Flavonone synthase	Benzaldehyde	Benzenoids	Benzene and substituted derivatives	Benzoyl derivatives
Glyma.08G110500	M110T63_NEG	0.740362	0.00044212	Naringenin-chalcone synthase / Flavonone synthase	Histamine	Organic nitrogen compounds	Organonitrogen compounds	Amines
Glyma.08G110500	M112T69_POS	0.646874	0.00371457	Naringenin-chalcone synthase / Flavonone synthase	Cytosine	Organoheterocyclic compounds	Diazines	Pyrimidines and pyrimidine derivatives
Glyma.08G110500	M113T359_NEG	0.51522	0.0286558	Naringenin-chalcone synthase / Flavonone synthase	Ethyl crotonate	Lipids and lipid-like molecules	Fatty Acyls	Fatty acid esters
Glyma.08G110500	M113T98_NEG	-0.549697	0.0181171	Naringenin-chalcone synthase / Flavonone synthase	Acetylenedicarboxylate	Organic acids and derivatives	Carboxylic acids and derivatives	Dicarboxylic acids and derivatives
Glyma.08G110500	M114T359_NEG	0.511497	0.0300302	Naringenin-chalcone synthase / Flavonone synthase	4-Amino-2-methylenebutanoic acid	Organic acids and derivatives	Carboxylic acids and derivatives	Amino acids, peptides, and analogues
Glyma.08G110500	M115T139_NEG	0.603377	0.00802311	Naringenin-chalcone synthase / Flavonone synthase	Levulinic acid	Organic acids and derivatives	Carboxylic acids and derivatives	Carboxylic acid derivatives
Glyma.08G110500	M115T75_NEG	-0.707213	0.00102943	Naringenin-chalcone synthase / Flavonone synthase	Maleic acid	Organic acids and derivatives	Carboxylic acids and derivatives	Dicarboxylic acids and derivatives
Glyma.08G110500	M117T396_POS	0.552336	0.0174586	Naringenin-chalcone synthase / Flavonone synthase	fumarate
Glyma.08G110500	M118T73_POS	0.674499	0.0021385	Naringenin-chalcone synthase / Flavonone synthase	VALINE	Organic acids and derivatives	Carboxylic acids and derivatives	Amino acids, peptides, and analogues
Glyma.08G110500	M119T429_NEG	0.642245	0.00405384	Naringenin-chalcone synthase / Flavonone synthase	4-Vinylphenol	Benzenoids	Benzene and substituted derivatives	Styrenes
Glyma.08G110500	M119T67_NEG	-0.589797	0.00998703	Naringenin-chalcone synthase / Flavonone synthase	3,4-Dihydroxybutanoic acid	Organic acids and derivatives	Hydroxy acids and derivatives	Beta hydroxy acids and derivatives
Glyma.08G110500	M120T123_NEG	0.674116	0.00215574	Naringenin-chalcone synthase / Flavonone synthase	D-Cysteine	Organic acids and derivatives	Carboxylic acids and derivatives	Amino acids, peptides, and analogues
Glyma.08G110500	M120T125_1_POS	0.73845	0.000465737	Naringenin-chalcone synthase / Flavonone synthase	Indoline	Organoheterocyclic compounds	Indoles and derivatives	Indolines
Glyma.08G110500	M120T430_NEG	0.606813	0.00757924	Naringenin-chalcone synthase / Flavonone synthase	n-Phenylformamide	Benzenoids	Benzene and substituted derivatives	Anilides
Glyma.08G110500	M120T69_POS	0.545635	0.019169	Naringenin-chalcone synthase / Flavonone synthase	Threonine	Organic acids and derivatives	Carboxylic acids and derivatives	Amino acids, peptides, and analogues
Glyma.08G110500	M121T471_NEG	0.570254	0.0134717	Naringenin-chalcone synthase / Flavonone synthase	4-hydroxybenzaldehyde	Organic oxygen compounds	Organooxygen compounds	Carbonyl compounds
Glyma.08G110500	M129T285_NEG	0.63757	0.00442169	Naringenin-chalcone synthase / Flavonone synthase	3-methyl-2-oxovaleric acid	Organic acids and derivatives	Keto acids and derivatives	Short-chain keto acids and derivatives
Glyma.08G110500	M129T329_1_NEG	0.63382	0.00473607	Naringenin-chalcone synthase / Flavonone synthase	4-Methyl-2-oxopentanoic acid	Organic acids and derivatives	Keto acids and derivatives	Short-chain keto acids and derivatives
Glyma.08G110500	M129T73_NEG	0.579543	0.0117114	Naringenin-chalcone synthase / Flavonone synthase	Mesaconic acid	Lipids and lipid-like molecules	Fatty Acyls	Fatty acids and conjugates
Glyma.08G110500	M129T99_NEG	0.509566	0.0307631	Naringenin-chalcone synthase / Flavonone synthase	Citraconic acid	Lipids and lipid-like molecules	Fatty Acyls	Fatty acids and conjugates
Glyma.08G110500	M130T329_NEG	0.558825	0.0159195	Naringenin-chalcone synthase / Flavonone synthase	Creatine	Organic acids and derivatives	Carboxylic acids and derivatives	Amino acids, peptides, and analogues
Glyma.08G110500	M130T68_POS	0.746659	0.000371302	Naringenin-chalcone synthase / Flavonone synthase	5-Oxoproline	Organic acids and derivatives	Carboxylic acids and derivatives	Amino acids, peptides, and analogues
Glyma.08G110500	M132T98_2_POS	0.5244	0.0254748	Naringenin-chalcone synthase / Flavonone synthase	L-Isoleucine	Organic acids and derivatives	Carboxylic acids and derivatives	Amino acids, peptides, and analogues
Glyma.08G110500	M134T201_POS	0.562887	0.0150122	Naringenin-chalcone synthase / Flavonone synthase	4-Methylthiobutanaldoxime	Organic nitrogen compounds	Organonitrogen compounds	Oximes
Glyma.08G110500	M134T411_POS	0.632378	0.00486169	Naringenin-chalcone synthase / Flavonone synthase	Indoxyl	Organoheterocyclic compounds	Indoles and derivatives	Hydroxyindoles
Glyma.08G110500	M135T257_POS	-0.507732	0.031472	Naringenin-chalcone synthase / Flavonone synthase	FEMA 3677	Organic acids and derivatives	Carboxylic acids and derivatives	Carboxylic acid derivatives
Glyma.08G110500	M135T258_NEG	-0.5596	0.0157432	Naringenin-chalcone synthase / Flavonone synthase	p-Hydroxyacetophenone	Organic oxygen compounds	Organooxygen compounds	Carbonyl compounds
Glyma.08G110500	M135T565_POS	0.628247	0.00523671	Naringenin-chalcone synthase / Flavonone synthase	Chavicol	Benzenoids	Phenols	1-hydroxy-2-unsubstituted benzenoids
Glyma.08G110500	M136T433_NEG	0.813023	4.10059e-05	Naringenin-chalcone synthase / Flavonone synthase	Anthranilic acid	Benzenoids	Benzene and substituted derivatives	Benzoic acids and derivatives
Glyma.08G110500	M136T88_2_POS	0.520261	0.0268728	Naringenin-chalcone synthase / Flavonone synthase	ADENINE	Organoheterocyclic compounds	Imidazopyrimidines	Purines and purine derivatives
Glyma.08G110500	M137T309_NEG	0.623284	0.00571808	Naringenin-chalcone synthase / Flavonone synthase	2-(4-Hydroxyphenyl)ethanol	Benzenoids	Phenols	Tyrosols and derivatives
Glyma.08G110500	M137T530_NEG	0.522161	0.0262239	Naringenin-chalcone synthase / Flavonone synthase	4-Hydroxybenzoate	Benzenoids	Benzene and substituted derivatives	Benzoic acids and derivatives
Glyma.08G110500	M141T356_POS	0.691819	0.00146879	Naringenin-chalcone synthase / Flavonone synthase	2-Furan methyl acetate	Organoheterocyclic compounds	Heteroaromatic compounds
Glyma.08G110500	M141T614_POS	0.600864	0.00836074	Naringenin-chalcone synthase / Flavonone synthase	(2E,6Z)-Nona-2,6-dien-1-ol	Lipids and lipid-like molecules	Fatty Acyls	Fatty alcohols
Glyma.08G110500	M142T67_POS	0.782187	0.000125262	Naringenin-chalcone synthase / Flavonone synthase	carbamoyl phosphate
Glyma.08G110500	M143T951_POS	0.633379	0.00477421	Naringenin-chalcone synthase / Flavonone synthase	4-Imidazolone-5-acetate	Organic acids and derivatives	Carboxylic acids and derivatives	Amino acids, peptides, and analogues
Glyma.08G110500	M145T111_NEG	0.558261	0.016049	Naringenin-chalcone synthase / Flavonone synthase	4-Hydroxyquinazoline	Organoheterocyclic compounds	Diazanaphthalenes	Benzodiazines
Glyma.08G110500	M145T606_NEG	0.670533	0.00232279	Naringenin-chalcone synthase / Flavonone synthase	(Z)-3-Ureidoacrylate peracid	Organic acids and derivatives	Carboxylic acids and derivatives	Peroxycarboxylic acids and derivatives
Glyma.08G110500	M146T101_POS	0.598041	0.00875368	Naringenin-chalcone synthase / Flavonone synthase	Isoquinolone	Organoheterocyclic compounds	Isoquinolines and derivatives	Isoquinolones and derivatives
Glyma.08G110500	M147T61_POS	0.670596	0.00231978	Naringenin-chalcone synthase / Flavonone synthase	L-Lysine	Organic acids and derivatives	Carboxylic acids and derivatives	Amino acids, peptides, and analogues
Glyma.08G110500	M147T69_NEG	0.568479	0.0138308	Naringenin-chalcone synthase / Flavonone synthase	2-Hydroxyglutaric acid	Organic acids and derivatives	Hydroxy acids and derivatives	Short-chain hydroxy acids and derivatives
Glyma.08G110500	M147T69_POS	0.848494	8.57941e-06	Naringenin-chalcone synthase / Flavonone synthase	L-Glutamine	Organic acids and derivatives	Carboxylic acids and derivatives	Amino acids, peptides, and analogues
Glyma.08G110500	M147T99_NEG	0.574793	0.012587	Naringenin-chalcone synthase / Flavonone synthase	(-)-Citramalic acid	Lipids and lipid-like molecules	Fatty Acyls	Fatty acids and conjugates
Glyma.08G110500	M149T71_2_NEG	-0.544551	0.0194578	Naringenin-chalcone synthase / Flavonone synthase	Lyxose	Organic oxygen compounds	Organooxygen compounds	Carbohydrates and carbohydrate conjugates
Glyma.08G110500	M150T71_NEG	-0.541312	0.0203407	Naringenin-chalcone synthase / Flavonone synthase	Guanine	Organoheterocyclic compounds	Imidazopyrimidines	Purines and purine derivatives
Glyma.08G110500	M150T74_POS	0.667652	0.00246473	Naringenin-chalcone synthase / Flavonone synthase	Methionine	Organic acids and derivatives	Carboxylic acids and derivatives	Amino acids, peptides, and analogues
Glyma.08G110500	M151T119_NEG	-0.54611	0.0190437	Naringenin-chalcone synthase / Flavonone synthase	Vanillin	Benzenoids	Phenols	Methoxyphenols
Glyma.08G110500	M151T67_NEG	-0.544647	0.0194319	Naringenin-chalcone synthase / Flavonone synthase	Ribitol	Organic oxygen compounds	Organooxygen compounds	Carbohydrates and carbohydrate conjugates
Glyma.08G110500	M151T71_NEG	-0.530051	0.0236579	Naringenin-chalcone synthase / Flavonone synthase	N1-Methyl-2-pyridone-5-carboxamide	Organoheterocyclic compounds	Pyridines and derivatives	Pyridinecarboxylic acids and derivatives
Glyma.08G110500	M152T564_NEG	0.550156	0.0180013	Naringenin-chalcone synthase / Flavonone synthase	4-(beta-Acetylaminoethyl)imidazole	Organic acids and derivatives	Carboxylic acids and derivatives	Carboxylic acid derivatives
Glyma.08G110500	M154T63_NEG	0.814903	3.80626e-05	Naringenin-chalcone synthase / Flavonone synthase	Histidine	Organic acids and derivatives	Carboxylic acids and derivatives	Amino acids, peptides, and analogues
Glyma.08G110500	M155T63_NEG	0.809388	4.72534e-05	Naringenin-chalcone synthase / Flavonone synthase	Indole-3-acetonitrile	Organoheterocyclic compounds	Indoles and derivatives	Indoles
Glyma.08G110500	M156T63_POS	0.767908	0.000198249	Naringenin-chalcone synthase / Flavonone synthase	L-Histidine	Organic acids and derivatives	Carboxylic acids and derivatives	Amino acids, peptides, and analogues
Glyma.08G110500	M157T63_POS	0.74444	0.000395078	Naringenin-chalcone synthase / Flavonone synthase	3-Indoleacetonitrile	Organoheterocyclic compounds	Indoles and derivatives	Indoles
Glyma.08G110500	M158T107_NEG	0.640991	0.00414993	Naringenin-chalcone synthase / Flavonone synthase	5-Acetamidopentanoate	Lipids and lipid-like molecules	Fatty Acyls	Fatty acids and conjugates
Glyma.08G110500	M159T332_NEG	0.621902	0.00585828	Naringenin-chalcone synthase / Flavonone synthase	Pimelic acid	Lipids and lipid-like molecules	Fatty Acyls	Fatty acids and conjugates
Glyma.08G110500	M159T68_POS	0.561315	0.0153583	Naringenin-chalcone synthase / Flavonone synthase	4-Methylene-L-glutamine	Organic acids and derivatives	Carboxylic acids and derivatives	Amino acids, peptides, and analogues
Glyma.08G110500	M160T68_NEG	0.583326	0.0110496	Naringenin-chalcone synthase / Flavonone synthase	alpha-Aminoadipic acid	Organic acids and derivatives	Carboxylic acids and derivatives	Amino acids, peptides, and analogues
Glyma.08G110500	M160T70_POS	-0.654661	0.00319653	Naringenin-chalcone synthase / Flavonone synthase	Calystegine A5	Alkaloids and derivatives	Tropane alkaloids
Glyma.08G110500	M161T69_POS	0.849521	8.15298e-06	Naringenin-chalcone synthase / Flavonone synthase	N(alpha)-Acetyl-L-2,4-diaminobutyrate	Organic acids and derivatives	Carboxylic acids and derivatives	Amino acids, peptides, and analogues
Glyma.08G110500	M162T73_POS	0.511629	0.0299808	Naringenin-chalcone synthase / Flavonone synthase	D-2-Aminoadipic acid	Organic acids and derivatives	Carboxylic acids and derivatives	Amino acids, peptides, and analogues
Glyma.08G110500	M163T430_NEG	0.660681	0.00283794	Naringenin-chalcone synthase / Flavonone synthase	trans-4-Coumaric acid	Phenylpropanoids and polyketides	Cinnamic acids and derivatives	Hydroxycinnamic acids and derivatives
Glyma.08G110500	M164T415_NEG	-0.509207	0.030901	Naringenin-chalcone synthase / Flavonone synthase	Phenylalanine	Organic acids and derivatives	Carboxylic acids and derivatives	Amino acids, peptides, and analogues
Glyma.08G110500	M164T430_NEG	0.630326	0.00504516	Naringenin-chalcone synthase / Flavonone synthase	L-Methionine S-oxide	Organic acids and derivatives	Carboxylic acids and derivatives	Amino acids, peptides, and analogues
Glyma.08G110500	M165T662_POS	0.533139	0.0227089	Naringenin-chalcone synthase / Flavonone synthase	(6Z,8E)-6,8,10-Undecatrien-3-one	Organic oxygen compounds	Organooxygen compounds	Carbonyl compounds
Glyma.08G110500	M165T68_NEG	-0.571064	0.0133102	Naringenin-chalcone synthase / Flavonone synthase	Ribonic acid	Organic oxygen compounds	Organooxygen compounds	Carbohydrates and carbohydrate conjugates
Glyma.08G110500	M166T126_2_POS	0.735888	0.000499038	Naringenin-chalcone synthase / Flavonone synthase	L-Phenylalanine	Organic acids and derivatives	Carboxylic acids and derivatives	Amino acids, peptides, and analogues
Glyma.08G110500	M166T519_POS	0.601106	0.00832782	Naringenin-chalcone synthase / Flavonone synthase	D-Phenylalanine	Organic acids and derivatives	Carboxylic acids and derivatives	Amino acids, peptides, and analogues
Glyma.08G110500	M166T660_POS	0.67847	0.0019662	Naringenin-chalcone synthase / Flavonone synthase	Hordenine	Benzenoids	Benzene and substituted derivatives	Phenethylamines
Glyma.08G110500	M166T68_NEG	-0.574775	0.0125905	Naringenin-chalcone synthase / Flavonone synthase	Pyridoxal	Organoheterocyclic compounds	Pyridines and derivatives	Pyridine carboxaldehydes
Glyma.08G110500	M167T125_POS	0.732983	0.000539188	Naringenin-chalcone synthase / Flavonone synthase	N-Formyl-4-amino-5-aminomethyl-2-methylpyrimidine	Organoheterocyclic compounds	Diazines	Pyrimidines and pyrimidine derivatives
Glyma.08G110500	M167T281_NEG	-0.641424	0.00411651	Naringenin-chalcone synthase / Flavonone synthase	Vanillic acid	Benzenoids	Benzene and substituted derivatives	Benzoic acids and derivatives
Glyma.08G110500	M167T563_NEG	0.510916	0.0302495	Naringenin-chalcone synthase / Flavonone synthase	Norharman	Organoheterocyclic compounds	Indoles and derivatives	Pyridoindoles
Glyma.08G110500	M167T693_POS	0.525996	0.0249511	Naringenin-chalcone synthase / Flavonone synthase	Dihydrojasmone	Organic oxygen compounds	Organooxygen compounds	Carbonyl compounds
Glyma.08G110500	M168T217_NEG	0.569001	0.0137244	Naringenin-chalcone synthase / Flavonone synthase	Phosphodimethylethanolamine	Organic acids and derivatives	Organic phosphoric acids and derivatives	Phosphate esters
Glyma.08G110500	M169T217_NEG	-0.644106	0.00391448	Naringenin-chalcone synthase / Flavonone synthase	3,4-Dihydroxyphenylethyleneglycol	Benzenoids	Phenols	Benzenediols
Glyma.08G110500	M169T641_POS	0.551601	0.0176402	Naringenin-chalcone synthase / Flavonone synthase	Homogentisate	Benzenoids	Benzene and substituted derivatives	Phenylacetic acids
Glyma.08G110500	M169T668_POS	0.660864	0.00282757	Naringenin-chalcone synthase / Flavonone synthase	(S)-4-Hydroxymandelate	Benzenoids	Phenols	1-hydroxy-2-unsubstituted benzenoids
Glyma.08G110500	M172T298_POS	0.66938	0.00237877	Naringenin-chalcone synthase / Flavonone synthase	N-Butanoylhomoserine lactone	Organic acids and derivatives	Carboxylic acids and derivatives	Amino acids, peptides, and analogues
Glyma.08G110500	M172T376_NEG	0.53928	0.0209105	Naringenin-chalcone synthase / Flavonone synthase	N-Acetylleucine	Organic acids and derivatives	Carboxylic acids and derivatives	Amino acids, peptides, and analogues
Glyma.08G110500	M172T76_POS	0.530443	0.0235358	Naringenin-chalcone synthase / Flavonone synthase	2,3,4,5-Tetrahydrodipicolinate	Organic acids and derivatives	Carboxylic acids and derivatives	Amino acids, peptides, and analogues
Glyma.08G110500	M173T421_NEG	0.550142	0.0180048	Naringenin-chalcone synthase / Flavonone synthase	Suberic acid	Lipids and lipid-like molecules	Fatty Acyls	Fatty acids and conjugates
Glyma.08G110500	M173T63_NEG	0.52885	0.0240352	Naringenin-chalcone synthase / Flavonone synthase	L(+)-Arginine	Organic acids and derivatives	Carboxylic acids and derivatives	Amino acids, peptides, and analogues
Glyma.08G110500	M174T421_NEG	0.504812	0.0326264	Naringenin-chalcone synthase / Flavonone synthase	L-Citrulline	Organic acids and derivatives	Carboxylic acids and derivatives	Amino acids, peptides, and analogues
Glyma.08G110500	M174T76_NEG	0.640361	0.00419895	Naringenin-chalcone synthase / Flavonone synthase	Monodehydroascorbate	Organoheterocyclic compounds	Dihydrofurans	Furanones
Glyma.08G110500	M175T287_2_NEG	0.643187	0.00398278	Naringenin-chalcone synthase / Flavonone synthase	2-Isopropylmalic acid	Lipids and lipid-like molecules	Fatty Acyls	Fatty acids and conjugates
Glyma.08G110500	M175T63_POS	0.666696	0.00251341	Naringenin-chalcone synthase / Flavonone synthase	Arginine	Organic acids and derivatives	Carboxylic acids and derivatives	Amino acids, peptides, and analogues
Glyma.08G110500	M176T287_NEG	0.6434	0.00396689	Naringenin-chalcone synthase / Flavonone synthase	1-Methoxy-1H-indole-3-methanol	Organoheterocyclic compounds	Indoles and derivatives	Indoles
Glyma.08G110500	M176T526_POS	0.642183	0.00405853	Naringenin-chalcone synthase / Flavonone synthase	Indole-3-acetic acid	Organoheterocyclic compounds	Indoles and derivatives	Indolyl carboxylic acids and derivatives
Glyma.08G110500	M177T488_POS	0.562	0.0152068	Naringenin-chalcone synthase / Flavonone synthase	Herniarin	Phenylpropanoids and polyketides	Coumarins and derivatives
Glyma.08G110500	M177T695_POS	0.715093	0.000850857	Naringenin-chalcone synthase / Flavonone synthase	4-deoxy-L-threo-hex-4-enopyranuronate
Glyma.08G110500	M177T70_NEG	-0.528694	0.0240848	Naringenin-chalcone synthase / Flavonone synthase	Diphosphate	Homogeneous non-metal compounds	Non-metal oxoanionic compounds	Non-metal pyrophosphates
Glyma.08G110500	M180T108_POS	0.714638	0.000860417	Naringenin-chalcone synthase / Flavonone synthase	D-(+)-Glucosamine hydrochloride	Organic oxygen compounds	Organooxygen compounds	Carbohydrates and carbohydrate conjugates
Glyma.08G110500	M180T157_POS	0.598429	0.00869891	Naringenin-chalcone synthase / Flavonone synthase	D-Glucosamine	Organic oxygen compounds	Organooxygen compounds	Carbohydrates and carbohydrate conjugates
Glyma.08G110500	M181T257_POS	-0.519549	0.0271192	Naringenin-chalcone synthase / Flavonone synthase	4-hydroxyphenyl pyruvate	Benzenoids	Benzene and substituted derivatives	Phenylpyruvic acid derivatives
Glyma.08G110500	M181T415_POS	0.622988	0.00574792	Naringenin-chalcone synthase / Flavonone synthase	4-Hydroxyphenylpyruvic acid	Benzenoids	Benzene and substituted derivatives	Phenylpyruvic acid derivatives
Glyma.08G110500	M181T480_POS	0.724698	0.000668855	Naringenin-chalcone synthase / Flavonone synthase	2-Hydroxy-3-(4-hydroxyphenyl)propenoate	Benzenoids	Benzene and substituted derivatives	Phenylpyruvic acid derivatives
Glyma.08G110500	M181T65_NEG	-0.559423	0.0157832	Naringenin-chalcone synthase / Flavonone synthase	D-Mannitol	Organic oxygen compounds	Organooxygen compounds	Carbohydrates and carbohydrate conjugates
Glyma.08G110500	M182T152_POS	0.650008	0.00349841	Naringenin-chalcone synthase / Flavonone synthase	L-Phosphinothricin	Organic acids and derivatives	Carboxylic acids and derivatives	Amino acids, peptides, and analogues
Glyma.08G110500	M183T662_POS	0.652121	0.00335849	Naringenin-chalcone synthase / Flavonone synthase	Methyl geranate	Lipids and lipid-like molecules	Prenol lipids	Monoterpenoids
Glyma.08G110500	M185T66_POS	0.634558	0.00467278	Naringenin-chalcone synthase / Flavonone synthase	5-Hydroxyisourate	Organoheterocyclic compounds	Imidazopyrimidines	Purines and purine derivatives
Glyma.08G110500	M186T417_POS	0.586539	0.0105111	Naringenin-chalcone synthase / Flavonone synthase	Ecgonine	Alkaloids and derivatives	Tropane alkaloids	NA
Glyma.08G110500	M186T66_POS	0.510819	0.0302862	Naringenin-chalcone synthase / Flavonone synthase	2-Amino-3-carboxymuconate semialdehyde	Organic acids and derivatives	Carboxylic acids and derivatives	Amino acids, peptides, and analogues
Glyma.08G110500	M187T69_POS	0.664724	0.00261626	Naringenin-chalcone synthase / Flavonone synthase	3-maleylpyruvate
Glyma.08G110500	M188T74_POS	-0.508607	0.0311324	Naringenin-chalcone synthase / Flavonone synthase	6-Acetamido-2-oxohexanoate	Organic acids and derivatives	Keto acids and derivatives	Medium-chain keto acids and derivatives
Glyma.08G110500	M188T76_NEG	0.759771	0.000253965	Naringenin-chalcone synthase / Flavonone synthase	N-Acetylglutamic acid	Organic acids and derivatives	Carboxylic acids and derivatives	Amino acids, peptides, and analogues
Glyma.08G110500	M188T99_POS	-0.582964	0.0111116	Naringenin-chalcone synthase / Flavonone synthase	2-(Acetamidomethylene)succinate	Lipids and lipid-like molecules	Fatty Acyls	Fatty acids and conjugates
Glyma.08G110500	M189T160_POS	0.625387	0.00550987	Naringenin-chalcone synthase / Flavonone synthase	Gly-Leu	Organic acids and derivatives	Carboxylic acids and derivatives	Amino acids, peptides, and analogues
Glyma.08G110500	M189T420_POS	0.650915	0.00343775	Naringenin-chalcone synthase / Flavonone synthase	Azelaic acid	Lipids and lipid-like molecules	Fatty Acyls	Fatty acids and conjugates
Glyma.08G110500	M189T63_POS	0.780019	0.000134594	Naringenin-chalcone synthase / Flavonone synthase	NE,NE,NE-TRIMETHYLLYSINE	Organic acids and derivatives	Carboxylic acids and derivatives	Amino acids, peptides, and analogues
Glyma.08G110500	M189T72_NEG	-0.55599	0.0165781	Naringenin-chalcone synthase / Flavonone synthase	Oxalosuccinate	Organic acids and derivatives	Carboxylic acids and derivatives	Tricarboxylic acids and derivatives
Glyma.08G110500	M189T99_POS	0.735233	0.000507868	Naringenin-chalcone synthase / Flavonone synthase	N6-Acetyl-L-lysine
Glyma.08G110500	M190T125_POS	0.720454	0.000744785	Naringenin-chalcone synthase / Flavonone synthase	Methyl indole-3-acetate	Organoheterocyclic compounds	Indoles and derivatives	Indolyl carboxylic acids and derivatives
Glyma.08G110500	M190T402_NEG	0.607044	0.00755009	Naringenin-chalcone synthase / Flavonone synthase	Calystegine C1	Alkaloids and derivatives	Tropane alkaloids
Glyma.08G110500	M190T606_NEG	0.677426	0.00201036	Naringenin-chalcone synthase / Flavonone synthase	5,6-Indolequinone-2-carboxylic acid	Organoheterocyclic compounds	Indoles and derivatives	NA
Glyma.08G110500	M191T533_POS	0.697173	0.00130112	Naringenin-chalcone synthase / Flavonone synthase	cyclic- 3,4-O-oxalyl-L-threonate
Glyma.08G110500	M191T69_POS	0.591524	0.00971769	Naringenin-chalcone synthase / Flavonone synthase	LL-2,6-Diaminoheptanedioate	Organic acids and derivatives	Carboxylic acids and derivatives	Amino acids, peptides, and analogues
Glyma.08G110500	M191T74_2_NEG	0.620886	0.00596317	Naringenin-chalcone synthase / Flavonone synthase	Citric acid	Organic acids and derivatives	Carboxylic acids and derivatives	Tricarboxylic acids and derivatives
Glyma.08G110500	M192T261_POS	0.601859	0.00822569	Naringenin-chalcone synthase / Flavonone synthase	N-Acetylmethionine	Organic acids and derivatives	Carboxylic acids and derivatives	Amino acids, peptides, and analogues
Glyma.08G110500	M192T74_NEG	0.597662	0.00880763	Naringenin-chalcone synthase / Flavonone synthase	Glucuronate	Organic oxygen compounds	Organooxygen compounds	Carbohydrates and carbohydrate conjugates
Glyma.08G110500	M194T511_NEG	0.603638	0.0079886	Naringenin-chalcone synthase / Flavonone synthase	o-DOPA-quinone
Glyma.08G110500	M195T215_POS	-0.506204	0.032072	Naringenin-chalcone synthase / Flavonone synthase	Methyl caffeate	Phenylpropanoids and polyketides	Cinnamic acids and derivatives	Hydroxycinnamic acids and derivatives
Glyma.08G110500	M195T386_NEG	0.598992	0.00861968	Naringenin-chalcone synthase / Flavonone synthase	3',5'-Dimethoxy-4'-hydroxyacetophenone	Organic oxygen compounds	Organooxygen compounds	Carbonyl compounds
Glyma.08G110500	M195T396_POS	0.561666	0.0152806	Naringenin-chalcone synthase / Flavonone synthase	Ethyl 4-ethoxybenzoate	Benzenoids	Benzene and substituted derivatives	Benzoic acids and derivatives
Glyma.08G110500	M195T421_POS	0.659125	0.00292731	Naringenin-chalcone synthase / Flavonone synthase	Ferulic acid	Phenylpropanoids and polyketides	Cinnamic acids and derivatives	Hydroxycinnamic acids and derivatives
Glyma.08G110500	M195T694_POS	0.522426	0.0261344	Naringenin-chalcone synthase / Flavonone synthase	Thymohydroquinone dimethyl ether	Lipids and lipid-like molecules	Prenol lipids	Monoterpenoids
Glyma.08G110500	M196T534_NEG	0.539224	0.0209262	Naringenin-chalcone synthase / Flavonone synthase	3,4-Dihydroxyphenylalanine	Organic acids and derivatives	Carboxylic acids and derivatives	Amino acids, peptides, and analogues
Glyma.08G110500	M197T280_NEG	0.56986	0.0135507	Naringenin-chalcone synthase / Flavonone synthase	(R)-3-(3,4-Dihydroxyphenyl)lactate	Phenylpropanoids and polyketides	Phenylpropanoic acids	NA
Glyma.08G110500	M197T292_POS	-0.535113	0.022118	Naringenin-chalcone synthase / Flavonone synthase	2,4,5-Trimethoxybenzaldehyde	Benzenoids	Benzene and substituted derivatives	Benzoyl derivatives
Glyma.08G110500	M197T678_POS	0.509304	0.0308636	Naringenin-chalcone synthase / Flavonone synthase	Oxacyclotridec-10-en-2-one	Organic oxygen compounds	Organooxygen compounds	Carbonyl compounds
Glyma.08G110500	M199T345_POS	-0.552305	0.0174663	Naringenin-chalcone synthase / Flavonone synthase	Syringic acid	Benzenoids	Benzene and substituted derivatives	Benzoic acids and derivatives
Glyma.08G110500	M201T162_NEG	0.637782	0.00440447	Naringenin-chalcone synthase / Flavonone synthase	Ala-Leu	Organic acids and derivatives	Carboxylic acids and derivatives	Amino acids, peptides, and analogues
Glyma.08G110500	M201T74_POS	0.662107	0.00275807	Naringenin-chalcone synthase / Flavonone synthase	D-erythrose 4-phosphate
Glyma.08G110500	M202T161_NEG	0.665737	0.00256298	Naringenin-chalcone synthase / Flavonone synthase	9-Methylthiononanaldoxime	Organic nitrogen compounds	Organonitrogen compounds	Oximes
Glyma.08G110500	M202T304_NEG	0.611005	0.00706478	Naringenin-chalcone synthase / Flavonone synthase	Indolepyruvate	Organoheterocyclic compounds	Indoles and derivatives	Indolyl carboxylic acids and derivatives
Glyma.08G110500	M206T116_POS	0.596859	0.0089226	Naringenin-chalcone synthase / Flavonone synthase	(R)-(Indol-3-yl)lactate	Organoheterocyclic compounds	Indoles and derivatives	Indolyl carboxylic acids and derivatives
Glyma.08G110500	M206T416_NEG	-0.549701	0.0181161	Naringenin-chalcone synthase / Flavonone synthase	N-Acetylphenylalanine	Organic acids and derivatives	Carboxylic acids and derivatives	Amino acids, peptides, and analogues
Glyma.08G110500	M207T68_NEG	-0.57367	0.0128014	Naringenin-chalcone synthase / Flavonone synthase	Dihydrolipoate	Lipids and lipid-like molecules	Fatty Acyls	Fatty acids and conjugates
Glyma.08G110500	M209T108_NEG	0.761531	0.000240912	Naringenin-chalcone synthase / Flavonone synthase	D-Galactarate	Organic oxygen compounds	Organooxygen compounds	Carbohydrates and carbohydrate conjugates
Glyma.08G110500	M209T699_POS	0.565204	0.0145133	Naringenin-chalcone synthase / Flavonone synthase	2-Hexyl-5-methylresorcinol	Benzenoids	Phenols	Benzenediols
Glyma.08G110500	M209T98_POS	0.657133	0.00304504	Naringenin-chalcone synthase / Flavonone synthase	L-Kynurenine	Organic oxygen compounds	Organooxygen compounds	Carbonyl compounds
Glyma.08G110500	M210T69_NEG	0.545496	0.0192058	Naringenin-chalcone synthase / Flavonone synthase	Phosphocreatine	Organic acids and derivatives	Carboxylic acids and derivatives	Amino acids, peptides, and analogues
Glyma.08G110500	M211T138_NEG	-0.582648	0.0111659	Naringenin-chalcone synthase / Flavonone synthase	2-Hydroxy-6-ketononatrienedioate	Organic acids and derivatives	Keto acids and derivatives	Medium-chain keto acids and derivatives
Glyma.08G110500	M211T355_NEG	0.648297	0.00361513	Naringenin-chalcone synthase / Flavonone synthase	7-Deoxyloganetin	Lipids and lipid-like molecules	Prenol lipids	Monoterpenoids
Glyma.08G110500	M211T412_POS	0.642658	0.00402255	Naringenin-chalcone synthase / Flavonone synthase	(-)-Jasmonic acid	Lipids and lipid-like molecules	Fatty Acyls	Lineolic acids and derivatives
Glyma.08G110500	M211T641_POS	0.670311	0.00233349	Naringenin-chalcone synthase / Flavonone synthase	5-Hydroxyferulic acid methyl ester	Phenylpropanoids and polyketides	Cinnamic acids and derivatives	Hydroxycinnamic acids and derivatives
Glyma.08G110500	M212T318_NEG	-0.630071	0.00506833	Naringenin-chalcone synthase / Flavonone synthase	N,N-Dihydroxy-L-tyrosine	Organic acids and derivatives	Carboxylic acids and derivatives	Amino acids, peptides, and analogues
Glyma.08G110500	M213T603_NEG	0.692079	0.00146024	Naringenin-chalcone synthase / Flavonone synthase	1-deoxy-D-xylulose 5-phosphate
Glyma.08G110500	M213T648_POS	0.726092	0.000645391	Naringenin-chalcone synthase / Flavonone synthase	12-Oxo-9(Z)-dodecenoic acid	Lipids and lipid-like molecules	Fatty Acyls	Fatty acids and conjugates
Glyma.08G110500	M213T695_POS	0.545405	0.0192301	Naringenin-chalcone synthase / Flavonone synthase	Cucurbic acid	Lipids and lipid-like molecules	Fatty Acyls	Lineolic acids and derivatives
Glyma.08G110500	M214T294_NEG	-0.570892	0.0133444	Naringenin-chalcone synthase / Flavonone synthase	Kinetin	Organoheterocyclic compounds	Imidazopyrimidines	Purines and purine derivatives
Glyma.08G110500	M215T67_NEG	-0.595775	0.00907976	Naringenin-chalcone synthase / Flavonone synthase	2-C-Methyl-D-erythritol 4-phosphate	Organic acids and derivatives	Organic phosphoric acids and derivatives	Phosphate esters
Glyma.08G110500	M216T625_NEG	0.532538	0.0228913	Naringenin-chalcone synthase / Flavonone synthase	beta-Alanyl-L-lysine	Organic acids and derivatives	Peptidomimetics	Hybrid peptides
Glyma.08G110500	M217T169_POS	0.579459	0.0117264	Naringenin-chalcone synthase / Flavonone synthase	Bisnorbiotin	Organic acids and derivatives	Carboxylic acids and derivatives	Amino acids, peptides, and analogues
Glyma.08G110500	M217T482_POS	-0.614449	0.00666353	Naringenin-chalcone synthase / Flavonone synthase	5-Carboxy-2-oxohept-3-enedioate	Organic acids and derivatives	Carboxylic acids and derivatives	Tricarboxylic acids and derivatives
Glyma.08G110500	M219T144_POS	0.649759	0.00351516	Naringenin-chalcone synthase / Flavonone synthase	D-Lysopine	Organic acids and derivatives	Carboxylic acids and derivatives	Amino acids, peptides, and analogues
Glyma.08G110500	M219T385_POS	0.680448	0.00188479	Naringenin-chalcone synthase / Flavonone synthase	N-Acetylserotonin	Organoheterocyclic compounds	Indoles and derivatives	Hydroxyindoles
Glyma.08G110500	M220T564_NEG	0.601488	0.00827587	Naringenin-chalcone synthase / Flavonone synthase	L-histidinol phosphate
Glyma.08G110500	M220T74_POS	-0.5827	0.0111569	Naringenin-chalcone synthase / Flavonone synthase	O-Succinyl-L-homoserine	Organic acids and derivatives	Carboxylic acids and derivatives	Amino acids, peptides, and analogues
Glyma.08G110500	M221T382_NEG	0.662899	0.00271448	Naringenin-chalcone synthase / Flavonone synthase	2-Succinylbenzoate	Organic oxygen compounds	Organooxygen compounds	Carbonyl compounds
Glyma.08G110500	M222T381_NEG	0.595981	0.00904976	Naringenin-chalcone synthase / Flavonone synthase	2-[(Carboxyacetyl)amino]benzoic acid	Benzenoids	Benzene and substituted derivatives	Benzoic acids and derivatives
Glyma.08G110500	M223T357_NEG	0.637134	0.00445733	Naringenin-chalcone synthase / Flavonone synthase	2-Benzylmalic acid	Phenylpropanoids and polyketides	Phenylpropanoic acids	NA
Glyma.08G110500	M223T692_POS	0.725232	0.000659783	Naringenin-chalcone synthase / Flavonone synthase	(+)-Dehydrovomifoliol	Lipids and lipid-like molecules	Prenol lipids	Sesquiterpenoids
Glyma.08G110500	M225T413_POS	0.581619	0.0113444	Naringenin-chalcone synthase / Flavonone synthase	Sinapinic acid	Phenylpropanoids and polyketides	Cinnamic acids and derivatives	Hydroxycinnamic acids and derivatives
Glyma.08G110500	M225T696_NEG	0.631556	0.0049345	Naringenin-chalcone synthase / Flavonone synthase	4,5-Dihydrovomifoliol	Lipids and lipid-like molecules	Prenol lipids	Sesquiterpenoids
Glyma.08G110500	M231T522_NEG	0.647316	0.00368346	Naringenin-chalcone synthase / Flavonone synthase	Cyclobrassinone	Organoheterocyclic compounds	Indoles and derivatives	Indoles
Glyma.08G110500	M231T573_POS	0.693996	0.00139858	Naringenin-chalcone synthase / Flavonone synthase	2,7-Dihydroxycadalene	Lipids and lipid-like molecules	Prenol lipids	Sesquiterpenoids
Glyma.08G110500	M232T572_NEG	0.581123	0.0114313	Naringenin-chalcone synthase / Flavonone synthase	4-(3-Methyl-2-butenoxy)isonitrosoacetophenone	Benzenoids	Phenol ethers
Glyma.08G110500	M233T456_POS	0.535631	0.0219649	Naringenin-chalcone synthase / Flavonone synthase	2-Oxo-10-methylthiodecanoic acid	Organic acids and derivatives	Keto acids and derivatives	Medium-chain keto acids and derivatives
Glyma.08G110500	M233T491_NEG	0.686037	0.0016696	Naringenin-chalcone synthase / Flavonone synthase	Geranyl phosphate	Lipids and lipid-like molecules	Prenol lipids	Isoprenoid phosphates
Glyma.08G110500	M235T237_POS	0.648038	0.00363303	Naringenin-chalcone synthase / Flavonone synthase	Strigolactone ABC-rings	Organoheterocyclic compounds	Lactones	Gamma butyrolactones
Glyma.08G110500	M235T732_POS	0.607469	0.00749669	Naringenin-chalcone synthase / Flavonone synthase	Germacrene A acid	Lipids and lipid-like molecules	Prenol lipids	Sesquiterpenoids
Glyma.08G110500	M237T232_POS	0.648269	0.00361703	Naringenin-chalcone synthase / Flavonone synthase	Ala-Phe	Organic acids and derivatives	Carboxylic acids and derivatives	Amino acids, peptides, and analogues
Glyma.08G110500	M237T343_NEG	0.580379	0.0115626	Naringenin-chalcone synthase / Flavonone synthase	3-Hydroxyflavone	Phenylpropanoids and polyketides	Flavonoids	Flavones
Glyma.08G110500	M237T724_POS	0.742967	0.000411558	Naringenin-chalcone synthase / Flavonone synthase	Aubergenone	Lipids and lipid-like molecules	Prenol lipids	Sesquiterpenoids
Glyma.08G110500	M238T617_POS	0.538648	0.0210901	Naringenin-chalcone synthase / Flavonone synthase	Anhalonine	Organoheterocyclic compounds	Tetrahydroisoquinolines	NA
Glyma.08G110500	M241T111_NEG	0.584379	0.0108707	Naringenin-chalcone synthase / Flavonone synthase	Citrubuntin	Phenylpropanoids and polyketides	Coumarins and derivatives
Glyma.08G110500	M241T345_POS	-0.558534	0.0159862	Naringenin-chalcone synthase / Flavonone synthase	(1R,6R)-6-Hydroxy-2-succinylcyclohexa-2,4-diene-1-carboxylate	Organic acids and derivatives	Keto acids and derivatives	Gamma-keto acids and derivatives
Glyma.08G110500	M241T476_NEG	0.581989	0.0112799	Naringenin-chalcone synthase / Flavonone synthase	D-myo-inositol 1,2-cyclic phosphate
Glyma.08G110500	M241T693_POS	0.659039	0.00293229	Naringenin-chalcone synthase / Flavonone synthase	Cucumegastigmane I	Lipids and lipid-like molecules	Prenol lipids	Sesquiterpenoids
Glyma.08G110500	M243T63_POS	-0.623479	0.00569852	Naringenin-chalcone synthase / Flavonone synthase	2-hydroxy-5-(methylsulfanyl)-3-oxopent-1-enyl 1-phosphate
Glyma.08G110500	M243T74_NEG	0.640117	0.00421803	Naringenin-chalcone synthase / Flavonone synthase	Pseudouridine	Nucleosides, nucleotides, and analogues	Nucleoside and nucleotide analogues	NA
Glyma.08G110500	M244T86_POS	0.747195	0.000365739	Naringenin-chalcone synthase / Flavonone synthase	CYTIDINE	Nucleosides, nucleotides, and analogues	Pyrimidine nucleosides	NA
Glyma.08G110500	M247T74_POS	0.51617	0.0283129	Naringenin-chalcone synthase / Flavonone synthase	2,4-Bis(acetamido)-2,4,6-trideoxy-beta-L-altropyranose	Organic oxygen compounds	Organooxygen compounds	Carbohydrates and carbohydrate conjugates
Glyma.08G110500	M249T526_POS	0.641181	0.00413528	Naringenin-chalcone synthase / Flavonone synthase	Pyridoxamine phosphate	Organoheterocyclic compounds	Pyridines and derivatives	Pyridoxamines
Glyma.08G110500	M251T65_POS	0.665538	0.00257338	Naringenin-chalcone synthase / Flavonone synthase	Cyclobrassinin sulfoxide	Organoheterocyclic compounds	Indoles and derivatives	Indoles
Glyma.08G110500	M253T556_NEG	0.585362	0.0107058	Naringenin-chalcone synthase / Flavonone synthase	7,4'-Dihydroxyflavone	Phenylpropanoids and polyketides	Flavonoids	Flavones
Glyma.08G110500	M255T447_NEG	0.600296	0.00843866	Naringenin-chalcone synthase / Flavonone synthase	Norbaeocystin	Organoheterocyclic compounds	Indoles and derivatives	Tryptamines and derivatives
Glyma.08G110500	M255T447_POS	0.597889	0.00877525	Naringenin-chalcone synthase / Flavonone synthase	5-L-Glutamyl-taurine	Organic acids and derivatives	Carboxylic acids and derivatives	Amino acids, peptides, and analogues
Glyma.08G110500	M255T559_POS	0.571671	0.0131903	Naringenin-chalcone synthase / Flavonone synthase	Daidzein	Phenylpropanoids and polyketides	Isoflavonoids	Isoflav-2-enes
Glyma.08G110500	M256T94_POS	-0.520265	0.0268714	Naringenin-chalcone synthase / Flavonone synthase	7,8-Dihydromonapterin	Organoheterocyclic compounds	Pteridines and derivatives	Pterins and derivatives
Glyma.08G110500	M259T126_POS	0.838849	1.36132e-05	Naringenin-chalcone synthase / Flavonone synthase	(1-Ribosylimidazole)-4-acetate	Nucleosides, nucleotides, and analogues	Imidazole ribonucleosides and ribonucleotides	NA
Glyma.08G110500	M260T237_NEG	-0.51408	0.0290712	Naringenin-chalcone synthase / Flavonone synthase	(-)-N-(N-Acetylaminomethyl)cytisine	Alkaloids and derivatives	Lupin alkaloids	Cytisine and derivatives
Glyma.08G110500	M261T228_POS	0.611984	0.00694881	Naringenin-chalcone synthase / Flavonone synthase	Biotin sulfoxide	Organoheterocyclic compounds	Biotin and derivatives	NA
Glyma.08G110500	M261T236_POS	0.631582	0.00493226	Naringenin-chalcone synthase / Flavonone synthase	gamma-Glutamylleucine	Organic acids and derivatives	Carboxylic acids and derivatives	Amino acids, peptides, and analogues
Glyma.08G110500	M263T237_POS	0.53442	0.0223243	Naringenin-chalcone synthase / Flavonone synthase	(E)-4-hydroxy-3-methylbut-2-en-1-yl diphosphate
Glyma.08G110500	M263T400_POS	0.536461	0.0217216	Naringenin-chalcone synthase / Flavonone synthase	9alpha-Hydroxyzaluzalin C	Lipids and lipid-like molecules	Prenol lipids	Terpene lactones
Glyma.08G110500	M264T72_POS	0.598673	0.00866447	Naringenin-chalcone synthase / Flavonone synthase	Ascorbalamic acid	Organic acids and derivatives	Carboxylic acids and derivatives	Amino acids, peptides, and analogues
Glyma.08G110500	M265T450_POS	0.64998	0.00350027	Naringenin-chalcone synthase / Flavonone synthase	Ilicifolinoside A	Lipids and lipid-like molecules	Fatty Acyls	Fatty acyl glycosides
Glyma.08G110500	M265T565_POS	0.671819	0.00226166	Naringenin-chalcone synthase / Flavonone synthase	Abscisate	Lipids and lipid-like molecules	Prenol lipids	Sesquiterpenoids
Glyma.08G110500	M265T614_POS	0.632375	0.00486196	Naringenin-chalcone synthase / Flavonone synthase	Norlinolenic acid	Lipids and lipid-like molecules	Fatty Acyls	Fatty acids and conjugates
Glyma.08G110500	M267T491_NEG	-0.520605	0.0267545	Naringenin-chalcone synthase / Flavonone synthase	Inosine	Nucleosides, nucleotides, and analogues	Purine nucleosides
Glyma.08G110500	M269T420_NEG	0.525024	0.0252687	Naringenin-chalcone synthase / Flavonone synthase	Benzyl beta-D-glucopyranoside	Organic oxygen compounds	Organooxygen compounds	Carbohydrates and carbohydrate conjugates
Glyma.08G110500	M269T498_2_NEG	0.63286	0.00481938	Naringenin-chalcone synthase / Flavonone synthase	Genistein	Phenylpropanoids and polyketides	Isoflavonoids	Isoflav-2-enes
Glyma.08G110500	M270T68_NEG	0.617353	0.00633982	Naringenin-chalcone synthase / Flavonone synthase	1,6-Dihydroxy-3-methoxy-10-methylacridone	Organoheterocyclic compounds	Quinolines and derivatives	Benzoquinolines
Glyma.08G110500	M271T100_POS	0.635512	0.00459207	Naringenin-chalcone synthase / Flavonone synthase	S-(Hydroxyphenylacetothiohydroximoyl)-L-cysteine	Organic acids and derivatives	Thiohydroximic acids and derivatives	Thiohydroximic acids
Glyma.08G110500	M271T499_POS	0.63769	0.00441192	Naringenin-chalcone synthase / Flavonone synthase	4,5,7-Trihydroxyisoflavone	Phenylpropanoids and polyketides	Isoflavonoids	Isoflav-2-enes
Glyma.08G110500	M273T154_NEG	0.641821	0.00408609	Naringenin-chalcone synthase / Flavonone synthase	alpha-D-galacturonate 1-phosphate
Glyma.08G110500	M273T214_POS	0.645371	0.00382207	Naringenin-chalcone synthase / Flavonone synthase	Arbutin	Organic oxygen compounds	Organooxygen compounds	Carbohydrates and carbohydrate conjugates
Glyma.08G110500	M273T349_POS	0.731299	0.000563689	Naringenin-chalcone synthase / Flavonone synthase	Galaxolidone	Organoheterocyclic compounds	Benzopyrans	2-benzopyrans
Glyma.08G110500	M273T388_POS	-0.517115	0.0279751	Naringenin-chalcone synthase / Flavonone synthase	Deoxyshikonin	Benzenoids	Naphthalenes	Naphthoquinones
Glyma.08G110500	M274T182_NEG	0.57827	0.0119412	Naringenin-chalcone synthase / Flavonone synthase	1,6-Anhydro-N-acetyl-beta-muramate	Organoheterocyclic compounds	Oxepanes	NA
Glyma.08G110500	M275T403_NEG	0.617303	0.00634522	Naringenin-chalcone synthase / Flavonone synthase	5-Amino-6-(1-D-ribitylamino)uracil	Organic oxygen compounds	Organooxygen compounds	Carbohydrates and carbohydrate conjugates
Glyma.08G110500	M275T83_POS	0.5276	0.0244329	Naringenin-chalcone synthase / Flavonone synthase	6-Phospho-2-dehydro-D-gluconate	Organic oxygen compounds	Organooxygen compounds	Carbohydrates and carbohydrate conjugates
Glyma.08G110500	M276T512_POS	0.855124	6.13089e-06	Naringenin-chalcone synthase / Flavonone synthase	Physostigmine	Organoheterocyclic compounds	Indoles and derivatives	Pyrroloindoles
Glyma.08G110500	M276T774_POS	0.728631	0.000604392	Naringenin-chalcone synthase / Flavonone synthase	Homatropine	Alkaloids and derivatives	Tropane alkaloids	NA
Glyma.08G110500	M277T119_NEG	0.628499	0.00521324	Naringenin-chalcone synthase / Flavonone synthase	gamma-Glutamylmethionine	Organic acids and derivatives	Carboxylic acids and derivatives	Amino acids, peptides, and analogues
Glyma.08G110500	M277T121_POS	0.53993	0.0207267	Naringenin-chalcone synthase / Flavonone synthase	Biotin sulfone	Organoheterocyclic compounds	Biotin and derivatives	NA
Glyma.08G110500	M277T401_POS	0.646923	0.0037111	Naringenin-chalcone synthase / Flavonone synthase	D-gluconate 6-phosphate
Glyma.08G110500	M277T70_POS	0.736958	0.000484896	Naringenin-chalcone synthase / Flavonone synthase	C20912	Organic acids and derivatives	Carboxylic acids and derivatives	Amino acids, peptides, and analogues
Glyma.08G110500	M277T74_POS	-0.652361	0.00334294	Naringenin-chalcone synthase / Flavonone synthase	6-Phosphogluconic acid	Organic oxygen compounds	Organooxygen compounds	Carbohydrates and carbohydrate conjugates
Glyma.08G110500	M279T469_NEG	0.632162	0.00488078	Naringenin-chalcone synthase / Flavonone synthase	8'-Hydroxyabscisate	Lipids and lipid-like molecules	Prenol lipids	Sesquiterpenoids
Glyma.08G110500	M279T781_POS	0.550459	0.017925	Naringenin-chalcone synthase / Flavonone synthase	?-linolenic acid	Lipids and lipid-like molecules	Fatty Acyls	Lineolic acids and derivatives
Glyma.08G110500	M280T413_NEG	0.683145	0.00177824	Naringenin-chalcone synthase / Flavonone synthase	4-Hydroxyphenylacetylglutamic acid	Organic acids and derivatives	Carboxylic acids and derivatives	Amino acids, peptides, and analogues
Glyma.08G110500	M283T383_NEG	-0.569534	0.0136164	Naringenin-chalcone synthase / Flavonone synthase	Psilocybin	Organoheterocyclic compounds	Indoles and derivatives	Tryptamines and derivatives
Glyma.08G110500	M283T722_NEG	-0.537075	0.0215429	Naringenin-chalcone synthase / Flavonone synthase	Tropisetron	Organoheterocyclic compounds	Indoles and derivatives	Indolecarboxylic acids and derivatives
Glyma.08G110500	M284T98_POS	0.644043	0.00391919	Naringenin-chalcone synthase / Flavonone synthase	GUANOSINE	Nucleosides, nucleotides, and analogues	Purine nucleosides	NA
Glyma.08G110500	M285T70_NEG	0.586313	0.0105483	Naringenin-chalcone synthase / Flavonone synthase	E-Trichoclin	Phenylpropanoids and polyketides	Coumarins and derivatives	Furanocoumarins
Glyma.08G110500	M286T347_NEG	-0.633505	0.00476325	Naringenin-chalcone synthase / Flavonone synthase	Grandisine III	Organoheterocyclic compounds	Quinolines and derivatives	Benzoquinolines
Glyma.08G110500	M287T111_NEG	0.761251	0.000242947	Naringenin-chalcone synthase / Flavonone synthase	Shikonin	Benzenoids	Naphthalenes	Naphthoquinones
Glyma.08G110500	M287T661_POS	0.731267	0.000564159	Naringenin-chalcone synthase / Flavonone synthase	N1-(5-phospho-beta-D-ribosyl)glycinamide
Glyma.08G110500	M288T186_NEG	0.570216	0.0134792	Naringenin-chalcone synthase / Flavonone synthase	Hyoscyamine	Alkaloids and derivatives	Tropane alkaloids
Glyma.08G110500	M288T644_POS	0.560264	0.0155933	Naringenin-chalcone synthase / Flavonone synthase	(1S,2R)-1-C-(indol-3-yl)glycerol 3-phosphate
Glyma.08G110500	M290T131_POS	0.585875	0.0106207	Naringenin-chalcone synthase / Flavonone synthase	Atropine	Alkaloids and derivatives	Tropane alkaloids	NA
Glyma.08G110500	M290T72_POS	0.600716	0.00838105	Naringenin-chalcone synthase / Flavonone synthase	Isotabtoxin	Organic acids and derivatives	Peptidomimetics	Hybrid peptides
Glyma.08G110500	M291T358_POS	0.646513	0.00374017	Naringenin-chalcone synthase / Flavonone synthase	Epicatechin	Phenylpropanoids and polyketides	Flavonoids	Flavans
Glyma.08G110500	M291T360_NEG	-0.699094	0.001245	Naringenin-chalcone synthase / Flavonone synthase	cis-5-Methoxydecursidinol	Phenylpropanoids and polyketides	Coumarins and derivatives	Pyranocoumarins
Glyma.08G110500	M291T70_POS	0.590815	0.00982751	Naringenin-chalcone synthase / Flavonone synthase	N-(L-Arginino)succinate	Organic acids and derivatives	Carboxylic acids and derivatives	Amino acids, peptides, and analogues
Glyma.08G110500	M293T615_POS	0.735911	0.000498737	Naringenin-chalcone synthase / Flavonone synthase	12-Oxophytodienoic acid	Lipids and lipid-like molecules	Fatty Acyls	Eicosanoids
Glyma.08G110500	M293T636_NEG	-0.509252	0.0308838	Naringenin-chalcone synthase / Flavonone synthase	Cyclic dehypoxanthine futalosine	Benzenoids	Naphthalenes	Naphthalenecarboxylic acids and derivatives
Glyma.08G110500	M295T648_POS	0.703143	0.00113321	Naringenin-chalcone synthase / Flavonone synthase	8-[(1R,2R)-3-Oxo-2-{(Z)-pent-2-enyl}cyclopentyl]octanoate	Lipids and lipid-like molecules	Fatty Acyls	Eicosanoids
Glyma.08G110500	M295T780_NEG	0.758331	0.000265083	Naringenin-chalcone synthase / Flavonone synthase	13(S)-HODE	Lipids and lipid-like molecules	Fatty Acyls	Lineolic acids and derivatives
Glyma.08G110500	M297T558_NEG	0.563615	0.014854	Naringenin-chalcone synthase / Flavonone synthase	3-Hydroxy-3',4'-Dimethoxyflavone	Phenylpropanoids and polyketides	Flavonoids	Flavones
Glyma.08G110500	M297T803_NEG	0.59116	0.00977402	Naringenin-chalcone synthase / Flavonone synthase	(Z)-3-Hydroxyoctadec-7-enoic acid	Lipids and lipid-like molecules	Fatty Acyls	Fatty acids and conjugates
Glyma.08G110500	M298T307_NEG	0.565898	0.0143665	Naringenin-chalcone synthase / Flavonone synthase	(R)-N-Methylcoclaurine	Organoheterocyclic compounds	Isoquinolines and derivatives	Benzylisoquinolines
Glyma.08G110500	M299T408_NEG	-0.509858	0.0306517	Naringenin-chalcone synthase / Flavonone synthase	Icariside D2	Organic oxygen compounds	Organooxygen compounds	Carbohydrates and carbohydrate conjugates
Glyma.08G110500	M299T844_NEG	0.681639	0.00183711	Naringenin-chalcone synthase / Flavonone synthase	(R)-2-hydroxystearic acid	Lipids and lipid-like molecules	Fatty Acyls	Fatty acids and conjugates
Glyma.08G110500	M300T287_POS	0.644974	0.00385091	Naringenin-chalcone synthase / Flavonone synthase	(R)-4-phosphopantothenate
Glyma.08G110500	M301T530_NEG	-0.519991	0.0269662	Naringenin-chalcone synthase / Flavonone synthase	(-)-Mucronulatol	Phenylpropanoids and polyketides	Isoflavonoids	O-methylated isoflavonoids
Glyma.08G110500	M302T69_POS	0.650105	0.00349183	Naringenin-chalcone synthase / Flavonone synthase	(S)-6-O-Methylnorlaudanosoline	Organoheterocyclic compounds	Isoquinolines and derivatives	Benzylisoquinolines
Glyma.08G110500	M303T424_NEG	0.542737	0.0199484	Naringenin-chalcone synthase / Flavonone synthase	Oxypeucedanin hydrate	Phenylpropanoids and polyketides	Coumarins and derivatives	Furanocoumarins
Glyma.08G110500	M305T470_NEG	0.657156	0.00304367	Naringenin-chalcone synthase / Flavonone synthase	Pelargonidin	Phenylpropanoids and polyketides	Flavonoids	Hydroxyflavonoids
Glyma.08G110500	M306T334_NEG	0.626368	0.00541491	Naringenin-chalcone synthase / Flavonone synthase	Glutathione	Organic acids and derivatives	Carboxylic acids and derivatives	Amino acids, peptides, and analogues
Glyma.08G110500	M307T108_NEG	0.776003	0.000153429	Naringenin-chalcone synthase / Flavonone synthase	(R)-5-Diphosphomevalonate	Organic oxygen compounds	Organic oxoanionic compounds	Organic pyrophosphates
Glyma.08G110500	M311T121_POS	0.578865	0.0118333	Naringenin-chalcone synthase / Flavonone synthase	gamma-Glutamyltyrosine	Organic acids and derivatives	Carboxylic acids and derivatives	Amino acids, peptides, and analogues
Glyma.08G110500	M311T420_NEG	0.63207	0.00488891	Naringenin-chalcone synthase / Flavonone synthase	4-Hydroxycinnamyl alcohol 4-D-glucoside	Organic oxygen compounds	Organooxygen compounds	Carbohydrates and carbohydrate conjugates
Glyma.08G110500	M311T498_NEG	0.632569	0.00484492	Naringenin-chalcone synthase / Flavonone synthase	Acicerone	Phenylpropanoids and polyketides	Isoflavonoids	O-methylated isoflavonoids
Glyma.08G110500	M311T553_NEG	0.61848	0.00621762	Naringenin-chalcone synthase / Flavonone synthase	Honyudisin	Phenylpropanoids and polyketides	Coumarins and derivatives	Pyranocoumarins
Glyma.08G110500	M311T614_POS	0.724438	0.000673315	Naringenin-chalcone synthase / Flavonone synthase	13(S)-HPOT	Lipids and lipid-like molecules	Fatty Acyls	Lineolic acids and derivatives
Glyma.08G110500	M311T680_POS	0.660753	0.00283387	Naringenin-chalcone synthase / Flavonone synthase	13(S)-Hydroperoxylinolenic acid	Lipids and lipid-like molecules	Fatty Acyls	Lineolic acids and derivatives
Glyma.08G110500	M312T554_NEG	-0.69956	0.00123167	Naringenin-chalcone synthase / Flavonone synthase	N-cis-Feruloyltyramine	Phenylpropanoids and polyketides	Cinnamic acids and derivatives	Hydroxycinnamic acids and derivatives
Glyma.08G110500	M313T382_NEG	0.697252	0.00129876	Naringenin-chalcone synthase / Flavonone synthase	(+)-Bornyl diphosphate	Lipids and lipid-like molecules	Prenol lipids	Monoterpenoids
Glyma.08G110500	M318T328_POS	0.669973	0.00234984	Naringenin-chalcone synthase / Flavonone synthase	Protoemetine	Organoheterocyclic compounds	Quinolizidines	NA
Glyma.08G110500	M319T431_NEG	0.572339	0.0130594	Naringenin-chalcone synthase / Flavonone synthase	4-Coumaroylshikimate	Phenylpropanoids and polyketides	Cinnamic acids and derivatives	Hydroxycinnamic acids and derivatives
Glyma.08G110500	M320T172_POS	0.669173	0.00238897	Naringenin-chalcone synthase / Flavonone synthase	Coronatine	Organic acids and derivatives	Carboxylic acids and derivatives	Amino acids, peptides, and analogues
Glyma.08G110500	M321T508_POS	-0.585269	0.0107214	Naringenin-chalcone synthase / Flavonone synthase	Dihydromyricetin	Phenylpropanoids and polyketides	Flavonoids	Flavans
Glyma.08G110500	M323T391_NEG	0.805158	5.55241e-05	Naringenin-chalcone synthase / Flavonone synthase	5-enolpyruvoyl-shikimate 3-phosphate
Glyma.08G110500	M325T198_NEG	0.668288	0.00243281	Naringenin-chalcone synthase / Flavonone synthase	trans-p-Coumaroyl beta-D-glucopyranoside	Phenylpropanoids and polyketides	Cinnamic acids and derivatives	Hydroxycinnamic acids and derivatives
Glyma.08G110500	M327T479_POS	0.599707	0.00852009	Naringenin-chalcone synthase / Flavonone synthase	NPE_327.1704_12.2	Organoheterocyclic compounds	Pyridines and derivatives	Pheniramines
Glyma.08G110500	M328T216_NEG	0.625571	0.00549203	Naringenin-chalcone synthase / Flavonone synthase	(R)-Reticuline	Organoheterocyclic compounds	Isoquinolines and derivatives	Benzylisoquinolines
Glyma.08G110500	M330T105_POS	0.627056	0.00534916	Naringenin-chalcone synthase / Flavonone synthase	Desulfoglucotropeolin	Organic oxygen compounds	Organooxygen compounds	Carbohydrates and carbohydrate conjugates
Glyma.08G110500	M334T606_NEG	0.638151	0.00437451	Naringenin-chalcone synthase / Flavonone synthase	beta-nicotinate D-ribonucleotide
Glyma.08G110500	M335T71_POS	0.64457	0.00388036	Naringenin-chalcone synthase / Flavonone synthase	Nicotinamide D-ribonucleotide	Nucleosides, nucleotides, and analogues	Pyridine nucleotides	Nicotinamide nucleotides
Glyma.08G110500	M336T331_NEG	-0.67919	0.00193623	Naringenin-chalcone synthase / Flavonone synthase	Baiyumine A	Organoheterocyclic compounds	Quinolines and derivatives	Benzoquinolines
Glyma.08G110500	M336T438_POS	0.640469	0.0041905	Naringenin-chalcone synthase / Flavonone synthase	Oryzamutaic acid D	Organoheterocyclic compounds	Diazanaphthalenes	Naphthyridines
Glyma.08G110500	M336T493_POS	0.679771	0.00191231	Naringenin-chalcone synthase / Flavonone synthase	7,8-dihydroneopterin 3-phosphate
Glyma.08G110500	M336T913_POS	0.576884	0.0121953	Naringenin-chalcone synthase / Flavonone synthase	N4-(beta-N-acetyl-D-glucosaminyl)-L-asparagine
Glyma.08G110500	M337T70_NEG	-0.553057	0.0172821	Naringenin-chalcone synthase / Flavonone synthase	p-Coumaroyl quinic acid	Organic oxygen compounds	Organooxygen compounds	Alcohols and polyols
Glyma.08G110500	M338T408_NEG	0.640833	0.00416214	Naringenin-chalcone synthase / Flavonone synthase	5-hydroxy-CMP
Glyma.08G110500	M338T700_POS	0.512424	0.0296834	Naringenin-chalcone synthase / Flavonone synthase	5-Hydroxymethyldeoxycytidylate	Nucleosides, nucleotides, and analogues	Pyrimidine nucleotides	Pyrimidine deoxyribonucleotides
Glyma.08G110500	M339T134_POS	0.588092	0.0102586	Naringenin-chalcone synthase / Flavonone synthase	O-Methylsterigmatocystin	Phenylpropanoids and polyketides	Sterigmatocystins	NA
Glyma.08G110500	M339T366_NEG	0.611932	0.00695483	Naringenin-chalcone synthase / Flavonone synthase	Dihydro-O-methylsterigmatocystin	Phenylpropanoids and polyketides	Sterigmatocystins	NA
Glyma.08G110500	M339T98_POS	0.707376	0.00102544	Naringenin-chalcone synthase / Flavonone synthase	1-(5-Phosphoribosyl)imidazole-4-acetate	Organic oxygen compounds	Organooxygen compounds	Carbohydrates and carbohydrate conjugates
Glyma.08G110500	M340T62_NEG	0.657837	0.00300296	Naringenin-chalcone synthase / Flavonone synthase	4-Methylthiobutyl-desulfoglucosinolate	Organic oxygen compounds	Organooxygen compounds	Carbohydrates and carbohydrate conjugates
Glyma.08G110500	M341T258_NEG	-0.556838	0.016379	Naringenin-chalcone synthase / Flavonone synthase	1-Caffeoyl-beta-D-glucose	Phenylpropanoids and polyketides	Cinnamic acids and derivatives	Hydroxycinnamic acids and derivatives
Glyma.08G110500	M341T309_NEG	0.649199	0.00355317	Naringenin-chalcone synthase / Flavonone synthase	Coniferin	Organic oxygen compounds	Organooxygen compounds	Carbohydrates and carbohydrate conjugates
Glyma.08G110500	M341T67_NEG	0.615023	0.00659847	Naringenin-chalcone synthase / Flavonone synthase	Trehalose	Organic oxygen compounds	Organooxygen compounds	Carbohydrates and carbohydrate conjugates
Glyma.08G110500	M342T131_POS	0.69711	0.001303	Naringenin-chalcone synthase / Flavonone synthase	Isocorypalmine	Alkaloids and derivatives	Protoberberine alkaloids and derivatives	NA
Glyma.08G110500	M342T258_NEG	-0.562527	0.0150909	Naringenin-chalcone synthase / Flavonone synthase	DIBOA-Glc	Organic oxygen compounds	Organooxygen compounds	Carbohydrates and carbohydrate conjugates
Glyma.08G110500	M342T354_NEG	0.638699	0.00433048	Naringenin-chalcone synthase / Flavonone synthase	Laudanine	Organoheterocyclic compounds	Isoquinolines and derivatives	Benzylisoquinolines
Glyma.08G110500	M342T395_NEG	-0.550215	0.0179865	Naringenin-chalcone synthase / Flavonone synthase	N-trans-Feruloylhomovanillylamine	Phenylpropanoids and polyketides	Cinnamic acids and derivatives	Hydroxycinnamic acids and derivatives
Glyma.08G110500	M343T73_POS	0.739211	0.000456218	Naringenin-chalcone synthase / Flavonone synthase	Lactose	Organic oxygen compounds	Organooxygen compounds	Carbohydrates and carbohydrate conjugates
Glyma.08G110500	M344T352_POS	0.669643	0.00236591	Naringenin-chalcone synthase / Flavonone synthase	(S)-Tetrahydropapaverine	Organoheterocyclic compounds	Isoquinolines and derivatives	Benzylisoquinolines
Glyma.08G110500	M345T228_NEG	0.563231	0.0149373	Naringenin-chalcone synthase / Flavonone synthase	Miraxanthin V	Organic acids and derivatives	Carboxylic acids and derivatives	Amino acids, peptides, and analogues
Glyma.08G110500	M345T542_NEG	0.606923	0.00756537	Naringenin-chalcone synthase / Flavonone synthase	Gibberellin A3	Lipids and lipid-like molecules	Prenol lipids	Diterpenoids
Glyma.08G110500	M346T144_POS	0.563884	0.0147959	Naringenin-chalcone synthase / Flavonone synthase	p-Hydroxybenzyldesulphoglucosinolate	Organic oxygen compounds	Organooxygen compounds	Carbohydrates and carbohydrate conjugates
Glyma.08G110500	M346T633_NEG	-0.631647	0.00492643	Naringenin-chalcone synthase / Flavonone synthase	AMP group
Glyma.08G110500	M347T115_NEG	0.622117	0.00583631	Naringenin-chalcone synthase / Flavonone synthase	IMP	Nucleosides, nucleotides, and analogues	Purine nucleotides	Purine ribonucleotides
Glyma.08G110500	M347T456_POS	0.639637	0.00425578	Naringenin-chalcone synthase / Flavonone synthase	Gibberellin A24	Lipids and lipid-like molecules	Prenol lipids	Diterpenoids
Glyma.08G110500	M347T512_POS	0.572363	0.0130547	Naringenin-chalcone synthase / Flavonone synthase	Gibberellin A80	Lipids and lipid-like molecules	Prenol lipids	Diterpenoids
Glyma.08G110500	M347T615_POS	0.624148	0.00563174	Naringenin-chalcone synthase / Flavonone synthase	Taxa-4(20),11(12)-dien-5alpha-acetoxy-10beta-ol	Lipids and lipid-like molecules	Prenol lipids	Diterpenoids
Glyma.08G110500	M347T635_POS	0.640357	0.00419921	Naringenin-chalcone synthase / Flavonone synthase	Gibberellin A44	Lipids and lipid-like molecules	Prenol lipids	Diterpenoids
Glyma.08G110500	M347T786_POS	0.577017	0.0121708	Naringenin-chalcone synthase / Flavonone synthase	Corticosterone	Lipids and lipid-like molecules	Steroids and steroid derivatives	Hydroxysteroids
Glyma.08G110500	M349T370_NEG	0.546684	0.0188928	Naringenin-chalcone synthase / Flavonone synthase	Polyneuridine aldehyde
Glyma.08G110500	M349T518_NEG	0.668595	0.00241752	Naringenin-chalcone synthase / Flavonone synthase	Gibberellin A2	Lipids and lipid-like molecules	Prenol lipids	Diterpenoids
Glyma.08G110500	M351T615_POS	0.740268	0.000443257	Naringenin-chalcone synthase / Flavonone synthase	(5Z,13E)-11alpha-Hydroxy-9,15-dioxoprost-13-enoate	Lipids and lipid-like molecules	Fatty Acyls	Eicosanoids
Glyma.08G110500	M351T679_POS	0.687108	0.00163077	Naringenin-chalcone synthase / Flavonone synthase	Vinpocetine	Alkaloids and derivatives	Eburnan-type alkaloids	NA
Glyma.08G110500	M351T83_NEG	0.718181	0.000788318	Naringenin-chalcone synthase / Flavonone synthase	Deacetylepithienamycin F	Organoheterocyclic compounds	Lactams	Beta lactams
Glyma.08G110500	M352T393_POS	0.65562	0.00313698	Naringenin-chalcone synthase / Flavonone synthase	9-Ribosyl-cis-zeatin	Nucleosides, nucleotides, and analogues	Purine nucleosides
Glyma.08G110500	M353T150_POS	-0.502977	0.0333682	Naringenin-chalcone synthase / Flavonone synthase	Arbutin 6-phosphate	Organic oxygen compounds	Organooxygen compounds	Carbohydrates and carbohydrate conjugates
Glyma.08G110500	M353T442_NEG	0.622748	0.00577217	Naringenin-chalcone synthase / Flavonone synthase	5-amino-6-(5-phospho-D-ribosylamino)uracil
Glyma.08G110500	M353T70_NEG	-0.719277	0.000767064	Naringenin-chalcone synthase / Flavonone synthase	Chlorogenate	Organic oxygen compounds	Organooxygen compounds	Alcohols and polyols
Glyma.08G110500	M354T445_POS	0.507214	0.0316743	Naringenin-chalcone synthase / Flavonone synthase	Dihydrozeatin riboside	Nucleosides, nucleotides, and analogues	Purine nucleosides	NA
Glyma.08G110500	M355T307_NEG	0.651929	0.00337106	Naringenin-chalcone synthase / Flavonone synthase	Anthrasesamone C	Benzenoids	Anthracenes	Anthraquinones
Glyma.08G110500	M356T437_NEG	-0.709906	0.000965188	Naringenin-chalcone synthase / Flavonone synthase	Cycro-DOPA-5-glucoside	Organic oxygen compounds	Organooxygen compounds	Carbohydrates and carbohydrate conjugates
Glyma.08G110500	M358T537_POS	-0.560918	0.0154467	Naringenin-chalcone synthase / Flavonone synthase	p-chloromercuribenzoate
Glyma.08G110500	M359T413_POS	0.738231	0.000468514	Naringenin-chalcone synthase / Flavonone synthase	Versiconal	Benzenoids	Anthracenes	Anthraquinones
Glyma.08G110500	M361T114_NEG	0.653232	0.00328686	Naringenin-chalcone synthase / Flavonone synthase	Chelirubine	Alkaloids and derivatives	Benzophenanthridine alkaloids	Quaternary benzophenanthridine alkaloids
Glyma.08G110500	M361T607_NEG	0.517816	0.0277266	Naringenin-chalcone synthase / Flavonone synthase	Gibberellin A93	Lipids and lipid-like molecules	Prenol lipids	Diterpenoids
Glyma.08G110500	M363T475_NEG	0.54725	0.0187451	Naringenin-chalcone synthase / Flavonone synthase	Gibberellin A37 open lactone	Lipids and lipid-like molecules	Prenol lipids	Diterpenoids
Glyma.08G110500	M363T573_NEG	0.681621	0.0018378	Naringenin-chalcone synthase / Flavonone synthase	Gibberellin A8	Lipids and lipid-like molecules	Prenol lipids	Diterpenoids
Glyma.08G110500	M363T910_POS	0.569404	0.0136427	Naringenin-chalcone synthase / Flavonone synthase	3,6,9,12-Tetraoxatetracosan-1-ol	Organic oxygen compounds	Organooxygen compounds	Ethers
Glyma.08G110500	M363T922_NEG	0.561767	0.0152582	Naringenin-chalcone synthase / Flavonone synthase	XMP
Glyma.08G110500	M364T88_POS	0.691211	0.00148892	Naringenin-chalcone synthase / Flavonone synthase	GMP	Nucleosides, nucleotides, and analogues	Purine nucleotides	Purine ribonucleotides
Glyma.08G110500	M365T595_NEG	0.688712	0.00157405	Naringenin-chalcone synthase / Flavonone synthase	5-formamido-1-(5-phospho-D-ribosyl)-imidazole-4-carboxamide
Glyma.08G110500	M365T677_NEG	0.615089	0.00659105	Naringenin-chalcone synthase / Flavonone synthase	16-Methoxytabersonine	Alkaloids and derivatives	Plumeran-type alkaloids	NA
Glyma.08G110500	M366T481_NEG	-0.618086	0.00626013	Naringenin-chalcone synthase / Flavonone synthase	Citracridone II	Organoheterocyclic compounds	Quinolines and derivatives	Benzoquinolines
Glyma.08G110500	M367T509_NEG	0.604728	0.00784607	Naringenin-chalcone synthase / Flavonone synthase	4-O-Methylxanthohumol	Phenylpropanoids and polyketides	Linear 1,3-diarylpropanoids	Chalcones and dihydrochalcones
Glyma.08G110500	M367T680_POS	0.649126	0.00355818	Naringenin-chalcone synthase / Flavonone synthase	Bufotenine O-glucoside	Organic oxygen compounds	Organooxygen compounds	Carbohydrates and carbohydrate conjugates
Glyma.08G110500	M369T521_NEG	-0.558417	0.0160131	Naringenin-chalcone synthase / Flavonone synthase	(S)-1-Hydroxy-N-methylcanadine	Alkaloids and derivatives	Protoberberine alkaloids and derivatives	NA
Glyma.08G110500	M371T303_NEG	0.591027	0.00979467	Naringenin-chalcone synthase / Flavonone synthase	2-O-caffeoylglucarate
Glyma.08G110500	M373T133_POS	0.575249	0.0125007	Naringenin-chalcone synthase / Flavonone synthase	Citrusin E	Organic oxygen compounds	Organooxygen compounds	Carbohydrates and carbohydrate conjugates
Glyma.08G110500	M373T217_NEG	-0.611108	0.00705242	Naringenin-chalcone synthase / Flavonone synthase	Geniposidic acid	Lipids and lipid-like molecules	Prenol lipids	Terpene glycosides
Glyma.08G110500	M373T528_2_POS	0.656071	0.00310933	Naringenin-chalcone synthase / Flavonone synthase	Byzantionoside B	Lipids and lipid-like molecules	Fatty Acyls	Fatty acyl glycosides
Glyma.08G110500	M375T102_POS	0.517891	0.0277001	Naringenin-chalcone synthase / Flavonone synthase	Raphanuside	Benzenoids	Phenols	Methoxyphenols
Glyma.08G110500	M377T769_POS	0.592885	0.00950968	Naringenin-chalcone synthase / Flavonone synthase	9-cis-10'-Apo-beta-carotenal	Lipids and lipid-like molecules	Prenol lipids	Sesterterpenoids
Glyma.08G110500	M382T362_NEG	0.687319	0.00162322	Naringenin-chalcone synthase / Flavonone synthase	7-Methylthioheptyl-desulfoglucosinolate	Organic oxygen compounds	Organooxygen compounds	Carbohydrates and carbohydrate conjugates
Glyma.08G110500	M385T611_POS	0.56175	0.0152619	Naringenin-chalcone synthase / Flavonone synthase	S-Adenosyl-L-homocysteine	Nucleosides, nucleotides, and analogues	5'-deoxyribonucleosides	5'-deoxy-5'-thionucleosides
Glyma.08G110500	M386T695_NEG	0.723364	0.000691998	Naringenin-chalcone synthase / Flavonone synthase	dCDP
Glyma.08G110500	M387T311_NEG	0.632917	0.00481444	Naringenin-chalcone synthase / Flavonone synthase	Secologanin	Lipids and lipid-like molecules	Prenol lipids	Terpene glycosides
Glyma.08G110500	M387T351_POS	0.546026	0.0190656	Naringenin-chalcone synthase / Flavonone synthase	Citroside A	Lipids and lipid-like molecules	Prenol lipids	Terpene glycosides
Glyma.08G110500	M389T407_NEG	-0.605937	0.00769047	Naringenin-chalcone synthase / Flavonone synthase	Loganin	Lipids and lipid-like molecules	Prenol lipids	Terpene glycosides
Glyma.08G110500	M393T82_NEG	-0.636475	0.00451165	Naringenin-chalcone synthase / Flavonone synthase	Epithienamycin F	Organoheterocyclic compounds	Lactams	Beta lactams
Glyma.08G110500	M395T419_POS	0.606673	0.00759684	Naringenin-chalcone synthase / Flavonone synthase	Diflufenican	Benzenoids	Benzene and substituted derivatives	Anilides
Glyma.08G110500	M396T433_NEG	0.562208	0.0151609	Naringenin-chalcone synthase / Flavonone synthase	8-Methylthiooctyl-desulfoglucosinolate	Organic oxygen compounds	Organooxygen compounds	Carbohydrates and carbohydrate conjugates
Glyma.08G110500	M399T441_POS	-0.519802	0.0270317	Naringenin-chalcone synthase / Flavonone synthase	S-(5'-Adenosyl)-L-methionine chloride	Nucleosides, nucleotides, and analogues	5'-deoxyribonucleosides	5'-deoxy-5'-thionucleosides
Glyma.08G110500	M399T609_NEG	-0.560755	0.0154832	Naringenin-chalcone synthase / Flavonone synthase	Versiconal hemiacetal acetate	Benzenoids	Anthracenes	Anthraquinones
Glyma.08G110500	M399T68_POS	0.527846	0.0243543	Naringenin-chalcone synthase / Flavonone synthase	S-Adenosyl-L-methionine	Nucleosides, nucleotides, and analogues	5'-deoxyribonucleosides	5'-deoxy-5'-thionucleosides
Glyma.08G110500	M400T240_NEG	0.615534	0.006541	Naringenin-chalcone synthase / Flavonone synthase	4'-O-Desmethylpapaveroxine	Organoheterocyclic compounds	Isoquinolines and derivatives	Benzylisoquinolines
Glyma.08G110500	M401T480_POS	0.698585	0.00125965	Naringenin-chalcone synthase / Flavonone synthase	(+)-2-Episesalatin	Lignans, neolignans and related compounds	Furanoid lignans
Glyma.08G110500	M401T614_POS	0.503995	0.0329551	Naringenin-chalcone synthase / Flavonone synthase	Citrusoside A	Lipids and lipid-like molecules	Saccharolipids
Glyma.08G110500	M403T330_2_POS	0.638724	0.00432841	Naringenin-chalcone synthase / Flavonone synthase	Arachiside A	Organic oxygen compounds	Organooxygen compounds	Carbohydrates and carbohydrate conjugates
Glyma.08G110500	M403T385_NEG	0.599851	0.00850005	Naringenin-chalcone synthase / Flavonone synthase	Scanderone	Phenylpropanoids and polyketides	Isoflavonoids	Pyranoisoflavonoids
Glyma.08G110500	M405T243_NEG	0.661917	0.00276859	Naringenin-chalcone synthase / Flavonone synthase	Honyucitrin	Phenylpropanoids and polyketides	Flavonoids	Flavones
Glyma.08G110500	M405T307_POS	0.658939	0.0029381	Naringenin-chalcone synthase / Flavonone synthase	UDP group
Glyma.08G110500	M411T590_NEG	0.671785	0.00226328	Naringenin-chalcone synthase / Flavonone synthase	11beta,13-Dihydrolactucopicrin	Benzenoids	Phenols	1-hydroxy-2-unsubstituted benzenoids
Glyma.08G110500	M412T507_POS	0.577709	0.0120435	Naringenin-chalcone synthase / Flavonone synthase	dADP
Glyma.08G110500	M413T356_POS	0.571258	0.0132717	Naringenin-chalcone synthase / Flavonone synthase	N,N'-Bis(3,4-dihydroxycinnamoyl)-1,4-butanediamine	Phenylpropanoids and polyketides	Cinnamic acids and derivatives	Hydroxycinnamic acids and derivatives
Glyma.08G110500	M413T366_NEG	-0.593092	0.00947832	Naringenin-chalcone synthase / Flavonone synthase	Asperuloside	Organic oxygen compounds	Organooxygen compounds	Carbohydrates and carbohydrate conjugates
Glyma.08G110500	M414T366_NEG	-0.584815	0.0107974	Naringenin-chalcone synthase / Flavonone synthase	N6-(delta2-Isopentenyl)-adenosine 5'-monophosphate	Nucleosides, nucleotides, and analogues	Purine nucleotides	Purine ribonucleotides
Glyma.08G110500	M417T549_NEG	-0.506068	0.0321258	Naringenin-chalcone synthase / Flavonone synthase	5'-Butyrylphosphoinosine	Nucleosides, nucleotides, and analogues	Purine nucleotides	Purine ribonucleotides
Glyma.08G110500	M419T122_NEG	0.654379	0.00321418	Naringenin-chalcone synthase / Flavonone synthase	D-myo-inositol (1,3,4)-trisphosphate
Glyma.08G110500	M420T549_POS	0.659815	0.0028874	Naringenin-chalcone synthase / Flavonone synthase	Cyanidin 3-xyloside	Phenylpropanoids and polyketides	Flavonoids	Flavonoid glycosides
Glyma.08G110500	M421T352_NEG	0.664775	0.00261354	Naringenin-chalcone synthase / Flavonone synthase	Losartan	Benzenoids	Benzene and substituted derivatives	Biphenyls and derivatives
Glyma.08G110500	M423T352_NEG	0.699945	0.00122078	Naringenin-chalcone synthase / Flavonone synthase	Chitobiose
Glyma.08G110500	M425T440_NEG	0.660824	0.00282987	Naringenin-chalcone synthase / Flavonone synthase	Lactuside A	Lipids and lipid-like molecules	Prenol lipids	Terpene lactones
Glyma.08G110500	M425T526_POS	0.62511	0.00553693	Naringenin-chalcone synthase / Flavonone synthase	Lactuside C	Organic oxygen compounds	Organooxygen compounds	Carbohydrates and carbohydrate conjugates
Glyma.08G110500	M430T906_POS	0.569474	0.0136286	Naringenin-chalcone synthase / Flavonone synthase	15alpha-Hydroxysolasodine	Lipids and lipid-like molecules	Steroids and steroid derivatives	Steroidal alkaloids
Glyma.08G110500	M431T375_NEG	0.539025	0.0209828	Naringenin-chalcone synthase / Flavonone synthase	Apigenin 5-glucoside	Phenylpropanoids and polyketides	Flavonoids	Flavonoid glycosides
Glyma.08G110500	M433T374_POS	0.577194	0.0121381	Naringenin-chalcone synthase / Flavonone synthase	Apigenin-7-O-glucoside	Phenylpropanoids and polyketides	Flavonoids	Flavonoid glycosides
Glyma.08G110500	M433T450_POS	0.706828	0.0010389	Naringenin-chalcone synthase / Flavonone synthase	Vitexin	Phenylpropanoids and polyketides	Flavonoids	Flavonoid glycosides
Glyma.08G110500	M434T449_POS	0.715091	0.00085089	Naringenin-chalcone synthase / Flavonone synthase	Peonidin 3-arabinoside	Phenylpropanoids and polyketides	Flavonoids	Flavonoid glycosides
Glyma.08G110500	M435T268_POS	-0.647272	0.00368653	Naringenin-chalcone synthase / Flavonone synthase	Glutathionylspermidine	Organic acids and derivatives	Carboxylic acids and derivatives	Amino acids, peptides, and analogues
Glyma.08G110500	M439T509_NEG	-0.543541	0.0197298	Naringenin-chalcone synthase / Flavonone synthase	Cichorioside B	Organic oxygen compounds	Organooxygen compounds	Carbohydrates and carbohydrate conjugates
Glyma.08G110500	M439T522_NEG	0.572055	0.0131149	Naringenin-chalcone synthase / Flavonone synthase	iron(III) dicitrate
Glyma.08G110500	M442T360_NEG	0.512402	0.0296916	Naringenin-chalcone synthase / Flavonone synthase	Dihydrofolate	Organic acids and derivatives	Carboxylic acids and derivatives	Amino acids, peptides, and analogues
Glyma.08G110500	M442T403_NEG	0.588967	0.0101185	Naringenin-chalcone synthase / Flavonone synthase	GDP group
Glyma.08G110500	M442T491_NEG	-0.578991	0.0118105	Naringenin-chalcone synthase / Flavonone synthase	GDP
Glyma.08G110500	M443T145_NEG	0.584396	0.0108679	Naringenin-chalcone synthase / Flavonone synthase	Ichangensin	Lipids and lipid-like molecules	Steroids and steroid derivatives	Steroid lactones
Glyma.08G110500	M443T608_POS	-0.502683	0.0334883	Naringenin-chalcone synthase / Flavonone synthase	(-)-Epicatechin 3-O-gallate	Phenylpropanoids and polyketides	Flavonoids	Flavans
Glyma.08G110500	M445T449_POS	0.598888	0.00863422	Naringenin-chalcone synthase / Flavonone synthase	3-(O-Geranylgeranyl)-sn-glycerol 1-phosphate	Lipids and lipid-like molecules	Prenol lipids	Diterpenoids
Glyma.08G110500	M447T396_POS	0.650084	0.0034933	Naringenin-chalcone synthase / Flavonone synthase	Biochanin-7-O-glucoside	Phenylpropanoids and polyketides	Isoflavonoids	Isoflavonoid O-glycosides
Glyma.08G110500	M447T464_NEG	0.628317	0.00523021	Naringenin-chalcone synthase / Flavonone synthase	Kaempferol-3-Glucoside	Phenylpropanoids and polyketides	Flavonoids	Flavonoid glycosides
Glyma.08G110500	M448T464_NEG	0.62115	0.00593573	Naringenin-chalcone synthase / Flavonone synthase	Cyanidin 3-O-beta-D-galactopyranoside	Phenylpropanoids and polyketides	Flavonoids	Flavonoid glycosides
Glyma.08G110500	M449T352_NEG	0.517793	0.0277345	Naringenin-chalcone synthase / Flavonone synthase	Copalyl diphosphate	Lipids and lipid-like molecules	Prenol lipids	Diterpenoids
Glyma.08G110500	M449T465_POS	0.606822	0.00757801	Naringenin-chalcone synthase / Flavonone synthase	kaempferol-3-O-glucoside	Phenylpropanoids and polyketides	Flavonoids	Flavonoid glycosides
Glyma.08G110500	M451T384_NEG	-0.5943	0.00929722	Naringenin-chalcone synthase / Flavonone synthase	3''-Oxoribostamycin	Organic oxygen compounds	Organooxygen compounds	Carbohydrates and carbohydrate conjugates
Glyma.08G110500	M453T303_NEG	0.589336	0.0100599	Naringenin-chalcone synthase / Flavonone synthase	Quadrangularin A	Phenylpropanoids and polyketides	Stilbenes
Glyma.08G110500	M453T349_POS	-0.60648	0.0076213	Naringenin-chalcone synthase / Flavonone synthase	Sieboldin	Phenylpropanoids and polyketides	Flavonoids	Flavonoid glycosides
Glyma.08G110500	M453T506_NEG	0.523489	0.0257776	Naringenin-chalcone synthase / Flavonone synthase	3''-Amino-3''-deoxygentamicin A2	NA	NA	NA
Glyma.08G110500	M454T434_NEG	-0.537804	0.0213322	Naringenin-chalcone synthase / Flavonone synthase	5-Ribosylparomamine	Organic oxygen compounds	Organooxygen compounds	Carbohydrates and carbohydrate conjugates
Glyma.08G110500	M455T419_NEG	0.591429	0.00973239	Naringenin-chalcone synthase / Flavonone synthase	Vindoline	Alkaloids and derivatives	Plumeran-type alkaloids	NA
Glyma.08G110500	M455T495_POS	0.758717	0.000262062	Naringenin-chalcone synthase / Flavonone synthase	5-phosphoribosyl-4-(N-succinocarboxamide)-5-aminoimidazole
Glyma.08G110500	M456T109_NEG	0.741426	0.000429419	Naringenin-chalcone synthase / Flavonone synthase	5,10-Methylenetetrahydrofolate	Organoheterocyclic compounds	Pteridines and derivatives	Pterins and derivatives
Glyma.08G110500	M457T447_NEG	0.581143	0.0114276	Naringenin-chalcone synthase / Flavonone synthase	Daidzein 6''-O-acetate	Phenylpropanoids and polyketides	Isoflavonoids	Isoflavonoid O-glycosides
Glyma.08G110500	M458T510_POS	0.666564	0.00252017	Naringenin-chalcone synthase / Flavonone synthase	OA-6129 A	Organoheterocyclic compounds	Lactams	Beta lactams
Glyma.08G110500	M459T540_NEG	-0.506771	0.0318484	Naringenin-chalcone synthase / Flavonone synthase	CDP-N-methylethanolamine
Glyma.08G110500	M461T439_NEG	0.547189	0.0187612	Naringenin-chalcone synthase / Flavonone synthase	gamma-L-Glutamyl-S-(hercyn-2-yl)-L-cysteine S-oxide	Organic acids and derivatives	Carboxylic acids and derivatives	Amino acids, peptides, and analogues
Glyma.08G110500	M462T99_NEG	0.597032	0.00889771	Naringenin-chalcone synthase / Flavonone synthase	N6-(1,2-Dicarboxyethyl)-AMP	Nucleosides, nucleotides, and analogues	Purine nucleotides	Purine ribonucleotides
Glyma.08G110500	M463T355_POS	0.65	0.0034989	Naringenin-chalcone synthase / Flavonone synthase	Retrocalamin	Organoheterocyclic compounds	Naphthopyrans
Glyma.08G110500	M463T494_NEG	-0.551185	0.0177435	Naringenin-chalcone synthase / Flavonone synthase	Quercetin 3'-glucoside	Phenylpropanoids and polyketides	Flavonoids	Flavonoid glycosides
Glyma.08G110500	M467T351_NEG	-0.660467	0.00285008	Naringenin-chalcone synthase / Flavonone synthase	Malibatol A	Phenylpropanoids and polyketides	2-arylbenzofuran flavonoids
Glyma.08G110500	M468T513_NEG	0.6216	0.00588932	Naringenin-chalcone synthase / Flavonone synthase	Dicaffeoylspermidine	Phenylpropanoids and polyketides	Cinnamic acids and derivatives	Hydroxycinnamic acids and derivatives
Glyma.08G110500	M469T272_NEG	0.665989	0.00254989	Naringenin-chalcone synthase / Flavonone synthase	Limonin	Lipids and lipid-like molecules	Prenol lipids	Triterpenoids
Glyma.08G110500	M469T539_POS	-0.559529	0.0157593	Naringenin-chalcone synthase / Flavonone synthase	Gentamicin A	Organic oxygen compounds	Organooxygen compounds	Carbohydrates and carbohydrate conjugates
Glyma.08G110500	M469T593_NEG	0.681746	0.00183286	Naringenin-chalcone synthase / Flavonone synthase	6',7'-Decylidenemarmin	Phenylpropanoids and polyketides	Coumarins and derivatives
Glyma.08G110500	M471T243_NEG	0.594481	0.0092703	Naringenin-chalcone synthase / Flavonone synthase	Hassmarin	Phenylpropanoids and polyketides	Coumarins and derivatives	Pyranocoumarins
Glyma.08G110500	M473T429_NEG	0.661649	0.00278351	Naringenin-chalcone synthase / Flavonone synthase	Genistin 6''-O-acetate	Phenylpropanoids and polyketides	Isoflavonoids	Isoflavonoid O-glycosides
Glyma.08G110500	M474T459_POS	0.664936	0.00260503	Naringenin-chalcone synthase / Flavonone synthase	OA-6129 B1	Organoheterocyclic compounds	Lactams	Beta lactams
Glyma.08G110500	M478T469_POS	0.586037	0.010594	Naringenin-chalcone synthase / Flavonone synthase	CDP-glycerol
Glyma.08G110500	M479T725_NEG	0.655342	0.00315416	Naringenin-chalcone synthase / Flavonone synthase	6'-Oxogentamicin X2	NA	NA	NA
Glyma.08G110500	M481T237_NEG	0.546269	0.0190018	Naringenin-chalcone synthase / Flavonone synthase	dTTP
Glyma.08G110500	M481T503_NEG	-0.551194	0.0177412	Naringenin-chalcone synthase / Flavonone synthase	2'-Dehydrokanamycin A	Organic oxygen compounds	Organooxygen compounds	Carbohydrates and carbohydrate conjugates
Glyma.08G110500	M487T449_NEG	0.566004	0.0143442	Naringenin-chalcone synthase / Flavonone synthase	Glycitein 6''-O-acetylglucoside	Phenylpropanoids and polyketides	Isoflavonoids	Isoflavonoid O-glycosides
Glyma.08G110500	M490T337_NEG	-0.584845	0.0107924	Naringenin-chalcone synthase / Flavonone synthase	Demethylalangiside	Organic oxygen compounds	Organooxygen compounds	Carbohydrates and carbohydrate conjugates
Glyma.08G110500	M490T67_NEG	0.640485	0.00418925	Naringenin-chalcone synthase / Flavonone synthase	dATP
Glyma.08G110500	M491T397_NEG	0.674974	0.00211726	Naringenin-chalcone synthase / Flavonone synthase	Limocitrin 3-rhamnoside	Phenylpropanoids and polyketides	Flavonoids	Flavonoid glycosides
Glyma.08G110500	M492T277_NEG	0.572538	0.0130204	Naringenin-chalcone synthase / Flavonone synthase	Primulin	Phenylpropanoids and polyketides	Flavonoids	Flavonoid glycosides
Glyma.08G110500	M496T670_POS	-0.580606	0.0115224	Naringenin-chalcone synthase / Flavonone synthase	N6-(Delta2-isopentenyl)-adenosine 5-diphosphate
Glyma.08G110500	M503T447_POS	0.592046	0.00963748	Naringenin-chalcone synthase / Flavonone synthase	Daidzin 6''-O-malonate	Phenylpropanoids and polyketides	Isoflavonoids	Isoflavonoid O-glycosides
Glyma.08G110500	M505T332_NEG	-0.524544	0.0254272	Naringenin-chalcone synthase / Flavonone synthase	adenylyl-imidodiphosphate
Glyma.08G110500	M505T641_POS	0.540205	0.0206494	Naringenin-chalcone synthase / Flavonone synthase	Fagopyritol B2	Organic oxygen compounds	Organooxygen compounds	Carbohydrates and carbohydrate conjugates
Glyma.08G110500	M505T669_POS	0.656967	0.00305502	Naringenin-chalcone synthase / Flavonone synthase	Isomaltotriose	Organic oxygen compounds	Organooxygen compounds	Carbohydrates and carbohydrate conjugates
Glyma.08G110500	M508T508_POS	-0.595506	0.0091191	Naringenin-chalcone synthase / Flavonone synthase	Delphinidin 3-(6''-acetylglucoside)	Phenylpropanoids and polyketides	Flavonoids	Flavonoid glycosides
Glyma.08G110500	M514T409_POS	0.582371	0.0112137	Naringenin-chalcone synthase / Flavonone synthase	Zeatin riboside-O-glucoside	Nucleosides, nucleotides, and analogues	Purine nucleosides
Glyma.08G110500	M514T522_POS	0.666719	0.00251223	Naringenin-chalcone synthase / Flavonone synthase	(+)-Dioxinoacrimarine A	Organoheterocyclic compounds	Quinolines and derivatives	Benzoquinolines
Glyma.08G110500	M516T636_POS	0.69884	0.00125229	Naringenin-chalcone synthase / Flavonone synthase	Taurocholate	Lipids and lipid-like molecules	Steroids and steroid derivatives	Bile acids, alcohols and derivatives
Glyma.08G110500	M519T353_NEG	0.59872	0.0086579	Naringenin-chalcone synthase / Flavonone synthase	Quinate	Organic oxygen compounds	Organooxygen compounds	Alcohols and polyols
Glyma.08G110500	M519T498_POS	0.646895	0.0037131	Naringenin-chalcone synthase / Flavonone synthase	Genistein 7-O-beta-D-glucoside 6''-O-malonate	Phenylpropanoids and polyketides	Isoflavonoids	Isoflavonoid O-glycosides
Glyma.08G110500	M522T303_POS	0.781373	0.000128701	Naringenin-chalcone synthase / Flavonone synthase	4-(cytidine 5-diphospho)-2-C-methyl-D-erythritol
Glyma.08G110500	M522T70_NEG	0.549903	0.018065	Naringenin-chalcone synthase / Flavonone synthase	8-oxo-dGTP
Glyma.08G110500	M523T351_POS	0.616223	0.00646419	Naringenin-chalcone synthase / Flavonone synthase	Syringetin 3-glucuronide	Phenylpropanoids and polyketides	Flavonoids	Flavonoid glycosides
Glyma.08G110500	M525T512_NEG	0.661389	0.00279808	Naringenin-chalcone synthase / Flavonone synthase	Phaseolus epsilon	Lipids and lipid-like molecules	Prenol lipids	Terpene glycosides
Glyma.08G110500	M529T777_NEG	0.64591	0.00378321	Naringenin-chalcone synthase / Flavonone synthase	1,10-Bis(dihydrocaffeoyl)spermine	Benzenoids	Phenols	Benzenediols
Glyma.08G110500	M531T67_NEG	0.622725	0.00577449	Naringenin-chalcone synthase / Flavonone synthase	6-Methoxygossypol	Lipids and lipid-like molecules	Prenol lipids	Sesquiterpenoids
Glyma.08G110500	M533T237_NEG	0.636249	0.00453042	Naringenin-chalcone synthase / Flavonone synthase	Kunzeaphlogin A	Organic oxygen compounds	Organooxygen compounds	Carbohydrates and carbohydrate conjugates
Glyma.08G110500	M533T451_POS	0.688982	0.00156464	Naringenin-chalcone synthase / Flavonone synthase	Maackiain 3-O-glucosyl-6''-malonate	Phenylpropanoids and polyketides	Isoflavonoids	Furanoisoflavonoids
Glyma.08G110500	M534T478_NEG	-0.544084	0.0195831	Naringenin-chalcone synthase / Flavonone synthase	5''-Phosphoribosylparomamine	Organic oxygen compounds	Organooxygen compounds	Carbohydrates and carbohydrate conjugates
Glyma.08G110500	M534T486_NEG	0.634354	0.00469026	Naringenin-chalcone synthase / Flavonone synthase	Cyanidin 3-(6''-malonylglucoside)	Phenylpropanoids and polyketides	Flavonoids	Flavonoid glycosides
Glyma.08G110500	M534T68_NEG	0.612866	0.00684561	Naringenin-chalcone synthase / Flavonone synthase	Malvidin 3-(6''-acetylglucoside)	Phenylpropanoids and polyketides	Flavonoids	Flavonoid glycosides
Glyma.08G110500	M535T292_POS	0.641085	0.00414264	Naringenin-chalcone synthase / Flavonone synthase	2,16,19,20,25-Pentahydroxycucurbit-5-ene-3,11,22-trione	Lipids and lipid-like molecules	Steroids and steroid derivatives	Cucurbitacins
Glyma.08G110500	M538T401_NEG	-0.554042	0.0170431	Naringenin-chalcone synthase / Flavonone synthase	8-oxo-GTP
Glyma.08G110500	M543T526_POS	-0.548628	0.0183894	Naringenin-chalcone synthase / Flavonone synthase	Chaetoglobosin N	Alkaloids and derivatives	Cytochalasans	Chaetoglobosins
Glyma.08G110500	M544T303_POS	0.572575	0.0130133	Naringenin-chalcone synthase / Flavonone synthase	(-)-Acrimarine D	Organoheterocyclic compounds	Quinolines and derivatives	Benzoquinolines
Glyma.08G110500	M545T351_NEG	0.630495	0.00502987	Naringenin-chalcone synthase / Flavonone synthase	Citrobilin	Lipids and lipid-like molecules	Steroids and steroid derivatives	Steroid lactones
Glyma.08G110500	M547T559_POS	0.64382	0.00393568	Naringenin-chalcone synthase / Flavonone synthase	Judaicin 7-O-(6''-O-malonylglucoside)	Phenylpropanoids and polyketides	Isoflavonoids	Isoflavonoid O-glycosides
Glyma.08G110500	M551T379_NEG	-0.548771	0.0183529	Naringenin-chalcone synthase / Flavonone synthase	Lactucaside	Lignans, neolignans and related compounds	Lignan glycosides
Glyma.08G110500	M551T68_NEG	0.640961	0.00415229	Naringenin-chalcone synthase / Flavonone synthase	Cucumerin B	Phenylpropanoids and polyketides	Flavonoids	Flavonoid glycosides
Glyma.08G110500	M551T855_POS	0.639269	0.004285	Naringenin-chalcone synthase / Flavonone synthase	Lanceolitol A3	Organic oxygen compounds	Organooxygen compounds	Carbohydrates and carbohydrate conjugates
Glyma.08G110500	M554T534_POS	0.608068	0.00742212	Naringenin-chalcone synthase / Flavonone synthase	OA-6129 C	Organoheterocyclic compounds	Lactams	Beta lactams
Glyma.08G110500	M557T380_POS	0.574321	0.0126768	Naringenin-chalcone synthase / Flavonone synthase	8-Ethyl-12-methyl-3-vinylbacteriochlorophyllide d
Glyma.08G110500	M559T535_NEG	0.527955	0.0243196	Naringenin-chalcone synthase / Flavonone synthase	3'-Deoxymaysin	Phenylpropanoids and polyketides	Flavonoids	Flavonoid glycosides
Glyma.08G110500	M561T159_NEG	0.623431	0.00570333	Naringenin-chalcone synthase / Flavonone synthase	Protoporphyrin	Organoheterocyclic compounds	Tetrapyrroles and derivatives	Porphyrins
Glyma.08G110500	M562T496_POS	-0.539445	0.0208638	Naringenin-chalcone synthase / Flavonone synthase	Malvidin 3-glucoside-pyruvate	Phenylpropanoids and polyketides	Flavonoids	Flavonoid glycosides
Glyma.08G110500	M565T426_1_POS	-0.570993	0.0133243	Naringenin-chalcone synthase / Flavonone synthase	dTDP-alpha-D-glucose
Glyma.08G110500	M569T348_POS	0.663448	0.00268461	Naringenin-chalcone synthase / Flavonone synthase	Protoporphyrinogen IX	Organoheterocyclic compounds	Tetrapyrroles and derivatives	Porphyrins
Glyma.08G110500	M576T508_POS	0.643337	0.00397161	Naringenin-chalcone synthase / Flavonone synthase	N6-(Delta2-isopentenyl)-adenosine 5-triphosphate
Glyma.08G110500	M577T338_NEG	0.701316	0.00118256	Naringenin-chalcone synthase / Flavonone synthase	Procyanidin B1	Phenylpropanoids and polyketides	Flavonoids	Biflavonoids and polyflavonoids
Glyma.08G110500	M578T517_POS	-0.565661	0.0144165	Naringenin-chalcone synthase / Flavonone synthase	C37-phenolphthiocerol A
Glyma.08G110500	M579T478_NEG	-0.570158	0.0134909	Naringenin-chalcone synthase / Flavonone synthase	Naringin	Phenylpropanoids and polyketides	Flavonoids	Flavonoid glycosides
Glyma.08G110500	M580T338_POS	0.50563	0.0322999	Naringenin-chalcone synthase / Flavonone synthase	Pelargonidin 3-p-coumarylglucoside
Glyma.08G110500	M581T514_NEG	0.525645	0.0250654	Naringenin-chalcone synthase / Flavonone synthase	2'-Norberbamunine	Organoheterocyclic compounds	Isoquinolines and derivatives	Benzylisoquinolines
Glyma.08G110500	M587T636_POS	-0.543507	0.0197389	Naringenin-chalcone synthase / Flavonone synthase	(3Z)-Phycocyanobilin	Organoheterocyclic compounds	Tetrapyrroles and derivatives	Bilirubins
Glyma.08G110500	M588T514_NEG	0.651999	0.00336645	Naringenin-chalcone synthase / Flavonone synthase	ADP-alpha-D-glucose
Glyma.08G110500	M594T802_1_POS	0.639226	0.0042884	Naringenin-chalcone synthase / Flavonone synthase	pheophorbide a
Glyma.08G110500	M595T565_NEG	0.52959	0.0238023	Naringenin-chalcone synthase / Flavonone synthase	Berbamunine	Organoheterocyclic compounds	Isoquinolines and derivatives	Benzylisoquinolines
Glyma.08G110500	M597T621_NEG	0.558236	0.0160546	Naringenin-chalcone synthase / Flavonone synthase	5-Oxo-delta-bilirubin	Organoheterocyclic compounds	Tetrapyrroles and derivatives	NA
Glyma.08G110500	M607T920_POS	0.5945	0.00926741	Naringenin-chalcone synthase / Flavonone synthase	Phaeophorbide b	Organoheterocyclic compounds	Tetrapyrroles and derivatives	Chlorins
Glyma.08G110500	M608T322_NEG	0.650613	0.00345783	Naringenin-chalcone synthase / Flavonone synthase	Malvidin 3-glucoside-4-vinylphenol	Phenylpropanoids and polyketides	Flavonoids	Flavonoid glycosides
Glyma.08G110500	M609T68_NEG	0.706491	0.00104723	Naringenin-chalcone synthase / Flavonone synthase	Neohesperidin	Phenylpropanoids and polyketides	Flavonoids	Flavonoid glycosides
Glyma.08G110500	M610T490_NEG	0.597943	0.00876767	Naringenin-chalcone synthase / Flavonone synthase	Delphinidin 3-(6''-p-coumarylglucoside)	Phenylpropanoids and polyketides	Flavonoids	Flavonoid glycosides
Glyma.08G110500	M611T581_NEG	0.587531	0.0103493	Naringenin-chalcone synthase / Flavonone synthase	Protochlorophyllide	NA	NA	NA
Glyma.08G110500	M613T638_POS	0.570248	0.0134728	Naringenin-chalcone synthase / Flavonone synthase	13(1)-Oxo-magnesium-protoporphyrin IX 13-monomethyl ester	Organoheterocyclic compounds	Tetrapyrroles and derivatives	Metallotetrapyrroles
Glyma.08G110500	M616T622_POS	-0.592121	0.00962597	Naringenin-chalcone synthase / Flavonone synthase	6'''-Deamino-6'''-hydroxyneomycin C	Organic oxygen compounds	Organooxygen compounds	Carbohydrates and carbohydrate conjugates
Glyma.08G110500	M621T636_2_NEG	0.591845	0.00966828	Naringenin-chalcone synthase / Flavonone synthase	(+)-Tetrandrine	Lignans, neolignans and related compounds	NA	NA
Glyma.08G110500	M623T447_NEG	-0.625485	0.00550032	Naringenin-chalcone synthase / Flavonone synthase	Isorhamnetin-3-Galactoside-6''-Rhamnoside	Phenylpropanoids and polyketides	Flavonoids	Flavonoid glycosides
Glyma.08G110500	M625T390_POS	0.60668	0.00759602	Naringenin-chalcone synthase / Flavonone synthase	Bisnorponcitrin	Phenylpropanoids and polyketides	Coumarins and derivatives	Pyranocoumarins
Glyma.08G110500	M625T447_POS	-0.500856	0.0342419	Naringenin-chalcone synthase / Flavonone synthase	Isorhamnetin-3-O-rutinoside	Phenylpropanoids and polyketides	Flavonoids	Flavonoid glycosides
Glyma.08G110500	M625T491_POS	-0.58137	0.011388	Naringenin-chalcone synthase / Flavonone synthase	Buntanbismine	Organoheterocyclic compounds	Quinolines and derivatives	Benzoquinolines
Glyma.08G110500	M625T516_NEG	0.635189	0.00461928	Naringenin-chalcone synthase / Flavonone synthase	Vicinin 2	Phenylpropanoids and polyketides	Flavonoids	Flavonoid glycosides
[truncated: 3,400 more rows]
