# Supplementary material for: GRF5 mediates circadian clock to gate seed quality in soybean
Source: Research Square preprint supplement (doi:10.21203/rs.3.rs-5535877/v1), 2025-03-05
Supplement: Supplementary file 3 [file 6b3ce6834c8b472bdc01ab2c.xlsx]

## Sheet: WS82-Down
Cluster	ID	Description	GeneRatio	BgRatio	pvalue	p.adjust	qvalue	geneID	Count
0 h	09159	Environmental adaptation	207/3564	467/14423	4.38284e-21	7.27551e-19	5.07486e-19	Glyma.14G000800/Glyma.10G298400/Glyma.17G251000/Glyma.18G166800/Glyma.09G128800/Glyma.04G157200/Glyma.02G311800/Glyma.20G245600/Glyma.07G003200/Glyma.06G223800/Glyma.16G163200/Glyma.04G253500/Glyma.19G121900/Glyma.06G176900/Glyma.11G113500/Glyma.15G048600/Glyma.06G058500/Glyma.20G170000/Glyma.12G039400/Glyma.03G260300/Glyma.20G249600/Glyma.14G165700/Glyma.04G166300/Glyma.06G196200/Glyma.14G006800…	207		Down-regulated' means that gene expressions were decreased in seeds, compared to pod walls
0 h	04626	Plant-pathogen interaction	168/3564	368/14423	7.28538e-19	6.04687e-17	4.21785e-17	Glyma.14G000800/Glyma.10G298400/Glyma.17G251000/Glyma.18G166800/Glyma.09G128800/Glyma.04G157200/Glyma.02G311800/Glyma.20G245600/Glyma.07G003200/Glyma.06G223800/Glyma.04G253500/Glyma.19G121900/Glyma.06G176900/Glyma.11G113500/Glyma.15G048600/Glyma.06G058500/Glyma.12G039400/Glyma.03G260300/Glyma.20G249600/Glyma.14G165700/Glyma.14G006800/Glyma.04G204400/Glyma.07G051600/Glyma.02G138800/Glyma.18G096500…	168
0 h	01001	Protein kinases	191/3564	454/14423	1.29691e-16	7.17626e-15	5.00563e-15	Glyma.08G150000/Glyma.14G000800/Glyma.12G166100/Glyma.17G022800/Glyma.17G053500/Glyma.10G298400/Glyma.19G191600/Glyma.08G002900/Glyma.17G188300/Glyma.15G066700/Glyma.13G274500/Glyma.01G157800/Glyma.20G179100/Glyma.01G082700/Glyma.15G171100/Glyma.07G125200/Glyma.03G243500/Glyma.13G002100/Glyma.15G269800/Glyma.04G029700/Glyma.02G311800/Glyma.20G245600/Glyma.07G003200/Glyma.18G212800/Glyma.20G229800…	191		The top 50 enriched KEGG pathways showed here.
0 h	99980	Enzymes with EC numbers	155/3564	402/14423	3.28158e-10	1.36186e-08	9.49931e-09	Glyma.06G175900/Glyma.15G056800/Glyma.08G093900/Glyma.08G315900/Glyma.05G042700/Glyma.19G136400/Glyma.18G220400/Glyma.03G175200/Glyma.20G031600/Glyma.09G015400/Glyma.17G125500/Glyma.16G073600/Glyma.08G059300/Glyma.05G138700/Glyma.10G022700/Glyma.19G239400/Glyma.15G061100/Glyma.04G093600/Glyma.08G268900/Glyma.19G013800/Glyma.13G253800/Glyma.09G008500/Glyma.02G129500/Glyma.10G183000/Glyma.18G097000…	155
0 h	09191	Unclassified: metabolism	158/3564	415/14423	6.53704e-10	2.1703e-08	1.51384e-08	Glyma.06G175900/Glyma.15G056800/Glyma.08G093900/Glyma.08G315900/Glyma.05G042700/Glyma.19G136400/Glyma.18G220400/Glyma.03G175200/Glyma.20G031600/Glyma.09G015400/Glyma.17G125500/Glyma.16G073600/Glyma.08G059300/Glyma.05G138700/Glyma.10G022700/Glyma.19G239400/Glyma.15G061100/Glyma.04G093600/Glyma.08G268900/Glyma.19G013800/Glyma.13G253800/Glyma.09G008500/Glyma.02G129500/Glyma.10G183000/Glyma.18G092500…	158
0 h	04016	MAPK signaling pathway - plant	89/3564	208/14423	6.95844e-09	1.78333e-07	1.24392e-07	Glyma.10G058300/Glyma.19G191600/Glyma.02G250200/Glyma.15G031800/Glyma.07G003200/Glyma.03G216700/Glyma.04G253500/Glyma.19G121900/Glyma.13G151100/Glyma.15G048600/Glyma.14G108400/Glyma.14G165700/Glyma.14G066400/Glyma.07G056900/Glyma.02G138800/Glyma.08G005100/Glyma.08G180800/Glyma.13G145100/Glyma.17G218700/Glyma.09G002600/Glyma.05G198700/Glyma.02G165800/Glyma.15G051600/Glyma.04G203200/Glyma.20G221800…	89
0 h	00630	Glyoxylate and dicarboxylate metabolism	58/3564	118/14423	7.52009e-09	1.78333e-07	1.24392e-07	Glyma.17G142800/Glyma.19G107300/Glyma.14G207700/Glyma.08G108900/Glyma.05G141400/Glyma.11G042200/Glyma.01G199700/Glyma.14G223500/Glyma.13G308700/Glyma.07G081900/Glyma.14G184500/Glyma.14G026400/Glyma.08G311200/Glyma.12G193800/Glyma.01G026700/Glyma.09G015500/Glyma.17G228800/Glyma.13G046200/Glyma.12G098900/Glyma.08G157700/Glyma.07G185400/Glyma.03G128300/Glyma.02G244000/Glyma.17G012000/Glyma.13G097100…	58
0 h	01003	Glycosyltransferases	121/3564	320/14423	1.02178e-07	2.12019e-06	1.47889e-06	Glyma.15G275000/Glyma.18G136200/Glyma.07G212900/Glyma.13G058100/Glyma.12G237000/Glyma.08G145600/Glyma.13G050600/Glyma.10G224000/Glyma.02G080900/Glyma.06G240600/Glyma.02G086200/Glyma.07G172000/Glyma.05G024800/Glyma.07G046500/Glyma.19G028100/Glyma.07G081600/Glyma.06G292500/Glyma.12G201500/Glyma.10G270800/Glyma.05G086900/Glyma.18G264700/Glyma.03G159200/Glyma.04G159200/Glyma.20G120300/Glyma.13G162600…	121
0 h	00053	Ascorbate and aldarate metabolism	38/3564	74/14423	6.98517e-07	1.28838e-05	8.98676e-06	Glyma.17G091000/Glyma.13G030400/Glyma.18G092900/Glyma.11G150243/Glyma.08G243000/Glyma.U031121/Glyma.04G009800/Glyma.07G013900/Glyma.19G061200/Glyma.20G224400/Glyma.06G068200/Glyma.10G162000/Glyma.02G292800/Glyma.12G032300/Glyma.17G077000/Glyma.06G114400/Glyma.13G076900/Glyma.13G057700/Glyma.02G051500/Glyma.11G107200/Glyma.06G183900/Glyma.14G152100/Glyma.18G265100/Glyma.19G028500/Glyma.16G073100/G…	38
0 h	00710	Carbon fixation in photosynthetic organisms	52/3564	116/14423	1.70071e-06	2.82318e-05	1.96924e-05	Glyma.18G193600/Glyma.03G191500/Glyma.11G111400/Glyma.05G025300/Glyma.16G013900/Glyma.10G059500/Glyma.08G067500/Glyma.16G044900/Glyma.07G045900/Glyma.18G030400/Glyma.20G122500/Glyma.06G087800/Glyma.12G161300/Glyma.09G210900/Glyma.13G270400/Glyma.01G026700/Glyma.19G106800/Glyma.07G074700/Glyma.20G192200/Glyma.01G010200/Glyma.13G046200/Glyma.16G077800/Glyma.07G185400/Glyma.07G142700/Glyma.13G097100…	52
0 h	00903	Limonene and pinene degradation	14/3564	18/14423	3.34809e-06	5.05257e-05	3.5243e-05	Glyma.17G091000/Glyma.13G030400/Glyma.02G051500/Glyma.06G183900/Glyma.14G152100/Glyma.02G034000/Glyma.01G031500/Glyma.13G170600/Glyma.13G340000/Glyma.04G248500/Glyma.06G114300/Glyma.16G131700/Glyma.12G057400/Glyma.15G034400	14
0 h	00906	Carotenoid biosynthesis	28/3564	51/14423	3.69919e-06	5.11721e-05	3.56939e-05	Glyma.10G160500/Glyma.11G252500/Glyma.11G253000/Glyma.02G240200/Glyma.18G111900/Glyma.19G131400/Glyma.13G147500/Glyma.19G251000/Glyma.03G128900/Glyma.09G252800/Glyma.10G231200/Glyma.11G151700/Glyma.15G172200/Glyma.10G086700/Glyma.20G227900/Glyma.02G272200/Glyma.17G174500/Glyma.01G154900/Glyma.09G066200/Glyma.18G239900/Glyma.14G209700/Glyma.08G306200/Glyma.14G045100/Glyma.01G073200/Glyma.09G000600…	28
0 h	00410	beta-Alanine metabolism	41/3564	89/14423	9.11348e-06	0.000116372	8.11727e-05	Glyma.03G117300/Glyma.12G120300/Glyma.08G282800/Glyma.06G178400/Glyma.17G091000/Glyma.08G276400/Glyma.15G111500/Glyma.13G030400/Glyma.09G168900/Glyma.16G080900/Glyma.15G055500/Glyma.08G307800/Glyma.09G007100/Glyma.09G227500/Glyma.02G051500/Glyma.18G109900/Glyma.06G183900/Glyma.14G152100/Glyma.11G035200/Glyma.18G043600/Glyma.14G211100/Glyma.16G218500/Glyma.18G116300/Glyma.08G303800/Glyma.02G034000…	41
0 h	01009	Protein phosphatases and associated proteins	152/3564	460/14423	2.7101e-05	0.000302543	0.000211032	Glyma.06G039200/Glyma.14G017800/Glyma.03G185200/Glyma.20G218400/Glyma.15G192300/Glyma.13G351800/Glyma.10G171900/Glyma.15G129300/Glyma.13G002100/Glyma.16G114700/Glyma.01G219800/Glyma.04G087200/Glyma.15G072000/Glyma.05G152000/Glyma.01G168200/Glyma.18G010400/Glyma.11G246900/Glyma.19G077700/Glyma.19G121900/Glyma.18G282300/Glyma.18G145500/Glyma.15G053700/Glyma.03G251500/Glyma.10G058900/Glyma.06G060800…	152
0 h	00520	Amino sugar and nucleotide sugar metabolism	93/3564	258/14423	2.79225e-05	0.000302543	0.000211032	Glyma.13G058100/Glyma.20G153900/Glyma.11G141200/Glyma.01G167500/Glyma.11G141300/Glyma.19G257700/Glyma.13G050600/Glyma.05G152300/Glyma.11G015800/Glyma.10G018400/Glyma.17G257800/Glyma.19G028100/Glyma.07G081600/Glyma.12G201500/Glyma.18G264700/Glyma.03G159200/Glyma.04G159200/Glyma.11G075700/Glyma.09G030300/Glyma.10G032400/Glyma.03G027300/Glyma.01G139500/Glyma.15G051500/Glyma.08G243000/Glyma.09G017000…	93
0 h	00500	Starch and sucrose metabolism	86/3564	235/14423	2.91608e-05	0.000302543	0.000211032	Glyma.18G136200/Glyma.08G334000/Glyma.20G153900/Glyma.11G015800/Glyma.08G028400/Glyma.02G086200/Glyma.07G172000/Glyma.17G257800/Glyma.10G270800/Glyma.11G176400/Glyma.12G005200/Glyma.20G120300/Glyma.08G025500/Glyma.08G244900/Glyma.16G217900/Glyma.06G129400/Glyma.08G288600/Glyma.12G129800/Glyma.05G219200/Glyma.04G235200/Glyma.13G161600/Glyma.14G218800/Glyma.04G180900/Glyma.17G109700/Glyma.15G029800…	86
0 h	00591	Linoleic acid metabolism	24/3564	45/14423	3.46437e-05	0.000338285	0.000235963	Glyma.08G102900/Glyma.19G132900/Glyma.03G130900/Glyma.13G239000/Glyma.10G249100/Glyma.07G039900/Glyma.02G190000/Glyma.20G144600/Glyma.16G008700/Glyma.U039300/Glyma.07G034800/Glyma.19G263300/Glyma.15G026400/Glyma.12G054700/Glyma.07G007000/Glyma.11G130200/Glyma.07G034900/Glyma.03G264300/Glyma.15G026500/Glyma.07G196800/Glyma.07G006900/Glyma.13G347700/Glyma.13G030300/Glyma.11G130300	24
0 h	00280	Valine, leucine and isoleucine degradation	40/3564	91/14423	4.49393e-05	0.00041444	0.000289083	Glyma.09G042000/Glyma.03G117300/Glyma.05G063900/Glyma.07G019100/Glyma.01G129400/Glyma.15G150900/Glyma.17G091000/Glyma.08G276400/Glyma.02G131500/Glyma.13G030400/Glyma.10G028700/Glyma.16G200200/Glyma.20G077000/Glyma.07G213500/Glyma.01G103100/Glyma.08G204300/Glyma.16G080900/Glyma.11G154423/Glyma.10G124700/Glyma.08G307800/Glyma.17G132300/Glyma.02G051500/Glyma.18G109900/Glyma.06G183900/Glyma.20G043000…	40
0 h	09109	Metabolism of terpenoids and polyketides	107/3564	309/14423	5.12037e-05	0.000447359	0.000312045	Glyma.02G059000/Glyma.10G160500/Glyma.08G093400/Glyma.13G326400/Glyma.04G237000/Glyma.11G252500/Glyma.11G021400/Glyma.17G091000/Glyma.02G256800/Glyma.12G173200/Glyma.02G273100/Glyma.13G030400/Glyma.11G112000/Glyma.11G253000/Glyma.02G240200/Glyma.16G200200/Glyma.18G111900/Glyma.19G131400/Glyma.18G229700/Glyma.13G147500/Glyma.19G251000/Glyma.03G128900/Glyma.11G228900/Glyma.09G252800/Glyma.18G274400…	107
0 h	00561	Glycerolipid metabolism	48/3564	117/14423	7.15394e-05	0.000593777	0.000414176	Glyma.06G039200/Glyma.05G022500/Glyma.17G091000/Glyma.12G045700/Glyma.13G030400/Glyma.17G077100/Glyma.03G008300/Glyma.13G162600/Glyma.19G175600/Glyma.03G174900/Glyma.10G046400/Glyma.13G134500/Glyma.06G220300/Glyma.09G263300/Glyma.19G132900/Glyma.01G113000/Glyma.13G093100/Glyma.18G197600/Glyma.07G069700/Glyma.09G207900/Glyma.14G077500/Glyma.13G101400/Glyma.17G248200/Glyma.02G051500/Glyma.15G012500…	48
0 h	04040	Ion channels	37/3564	89/14423	0.000337905	0.00267106	0.00186314	Glyma.11G048200/Glyma.04G157200/Glyma.06G223800/Glyma.12G194100/Glyma.16G218200/Glyma.13G308500/Glyma.16G111700/Glyma.05G077100/Glyma.18G263900/Glyma.14G161600/Glyma.01G193700/Glyma.13G308400/Glyma.03G257000/Glyma.13G161800/Glyma.06G077600/Glyma.12G099500/Glyma.12G204400/Glyma.07G056400/Glyma.06G190400/Glyma.02G299700/Glyma.06G126600/Glyma.13G296900/Glyma.01G157900/Glyma.19G221000/Glyma.08G241600…	37
0 h	00910	Nitrogen metabolism	27/3564	60/14423	0.000473877	0.00357562	0.00249409	Glyma.08G196200/Glyma.07G012500/Glyma.10G005200/Glyma.01G030500/Glyma.13G257200/Glyma.16G041200/Glyma.03G128300/Glyma.02G244000/Glyma.18G041100/Glyma.19G130800/Glyma.17G161900/Glyma.11G215500/Glyma.03G133600/Glyma.15G057700/Glyma.09G173200/Glyma.08G284000/Glyma.13G146100/Glyma.13G210800/Glyma.10G059400/Glyma.02G213700/Glyma.13G084000/Glyma.15G102000/Glyma.18G141900/Glyma.18G138400/Glyma.06G109200…	27
0 h	09106	Metabolism of other amino acids	118/3564	365/14423	0.000538137	0.00388394	0.00270915	Glyma.12G163700/Glyma.03G117300/Glyma.12G120300/Glyma.16G063200/Glyma.19G177200/Glyma.08G282800/Glyma.06G178400/Glyma.07G013800/Glyma.17G091000/Glyma.09G235400/Glyma.08G276400/Glyma.15G111500/Glyma.18G190300/Glyma.13G030400/Glyma.15G266700/Glyma.08G199000/Glyma.09G168900/Glyma.11G176400/Glyma.18G234600/Glyma.17G223900/Glyma.08G108900/Glyma.02G241200/Glyma.18G137100/Glyma.11G150243/Glyma.01G040000…	118
0 h	04712	Circadian rhythm - plant	39/3564	99/14423	0.00085089	0.00588532	0.00410517	Glyma.16G163200/Glyma.20G170000/Glyma.04G166300/Glyma.06G196200/Glyma.04G050200/Glyma.11G050000/Glyma.10G221500/Glyma.01G192100/Glyma.06G103200/Glyma.11G018700/Glyma.05G067100/Glyma.06G136600/Glyma.07G058200/Glyma.17G102200/Glyma.04G228300/Glyma.05G025000/Glyma.16G017400/Glyma.20G209900/Glyma.19G222000/Glyma.07G048500/Glyma.19G260900/Glyma.03G261800/Glyma.16G027200/Glyma.16G018000/Glyma.17G149300…	39
0 h	99997	Function unknown	23/3564	51/14423	0.00117337	0.00779119	0.00543457	Glyma.01G161700/Glyma.03G066000/Glyma.12G191200/Glyma.08G019500/Glyma.13G107800/Glyma.05G213000/Glyma.13G113900/Glyma.06G293500/Glyma.07G271000/Glyma.08G300800/Glyma.17G054200/Glyma.11G082000/Glyma.11G131700/Glyma.17G051500/Glyma.20G213200/Glyma.17G045900/Glyma.20G164100/Glyma.20G247000/Glyma.10G229000/Glyma.10G177000/Glyma.11G110000/Glyma.12G036900/Glyma.07G273000	23
0 h	00592	alpha-Linolenic acid metabolism	38/3564	98/14423	0.00139176	0.00867356	0.00605004	Glyma.12G120300/Glyma.07G162900/Glyma.08G102900/Glyma.20G077000/Glyma.17G050000/Glyma.10G124700/Glyma.19G132900/Glyma.12G191400/Glyma.04G240800/Glyma.03G130900/Glyma.11G035200/Glyma.13G239000/Glyma.07G039900/Glyma.02G190000/Glyma.14G223200/Glyma.01G235600/Glyma.17G209900/Glyma.05G180100/Glyma.16G008700/Glyma.17G246500/Glyma.13G109700/Glyma.19G057500/Glyma.13G047300/Glyma.04G035000/Glyma.19G263300…	38
0 h	09108	Metabolism of cofactors and vitamins	140/3564	453/14423	0.00141076	0.00867356	0.00605004	Glyma.12G082100/Glyma.11G235400/Glyma.12G020100/Glyma.12G161500/Glyma.15G203100/Glyma.19G139300/Glyma.10G097800/Glyma.17G142800/Glyma.19G148100/Glyma.02G143700/Glyma.04G210000/Glyma.06G113500/Glyma.08G188200/Glyma.17G091000/Glyma.03G010700/Glyma.04G249400/Glyma.14G003200/Glyma.10G128400/Glyma.11G194500/Glyma.13G030400/Glyma.18G158900/Glyma.01G226700/Glyma.13G225000/Glyma.13G234000/Glyma.08G108900…	140
0 h	00051	Fructose and mannose metabolism	45/3564	121/14423	0.00147836	0.00876455	0.00611351	Glyma.18G193600/Glyma.20G153900/Glyma.01G167500/Glyma.19G257700/Glyma.03G191500/Glyma.11G015800/Glyma.11G111400/Glyma.18G145500/Glyma.17G257800/Glyma.10G059500/Glyma.08G067500/Glyma.11G075700/Glyma.10G194300/Glyma.20G122500/Glyma.16G220300/Glyma.12G204700/Glyma.14G218800/Glyma.15G029800/Glyma.18G060600/Glyma.13G296600/Glyma.05G226600/Glyma.12G051800/Glyma.11G127200/Glyma.07G142700/Glyma.20G166400…	45
0 h	04070	Phosphatidylinositol signaling system	43/3564	115/14423	0.00164622	0.00942318	0.00657292	Glyma.04G213400/Glyma.05G022500/Glyma.20G013500/Glyma.19G121900/Glyma.05G169400/Glyma.20G207000/Glyma.06G109400/Glyma.08G186400/Glyma.17G077100/Glyma.10G060000/Glyma.07G045600/Glyma.06G218300/Glyma.04G253100/Glyma.04G088000/Glyma.20G173200/Glyma.15G046400/Glyma.18G255000/Glyma.08G127700/Glyma.14G059200/Glyma.10G255000/Glyma.10G183200/Glyma.05G197200/Glyma.04G009800/Glyma.13G093100/Glyma.09G241100…	43
0 h	00030	Pentose phosphate pathway	38/3564	100/14423	0.00213427	0.0118096	0.00823752	Glyma.18G193600/Glyma.07G122000/Glyma.16G063200/Glyma.03G191500/Glyma.11G111400/Glyma.07G013800/Glyma.18G145500/Glyma.05G025300/Glyma.08G199000/Glyma.08G067500/Glyma.10G194300/Glyma.03G100800/Glyma.20G122500/Glyma.17G218200/Glyma.20G153600/Glyma.02G202500/Glyma.07G142700/Glyma.20G166400/Glyma.20G125200/Glyma.10G293500/Glyma.17G101700/Glyma.08G182300/Glyma.07G126400/Glyma.18G277300/Glyma.20G243500…	38
0 h	00564	Glycerophospholipid metabolism	59/3564	171/14423	0.00249323	0.0133508	0.00931256	Glyma.06G039200/Glyma.05G022500/Glyma.06G176500/Glyma.04G033600/Glyma.07G080400/Glyma.02G165500/Glyma.12G045700/Glyma.20G207000/Glyma.06G169100/Glyma.06G216800/Glyma.09G195000/Glyma.17G077100/Glyma.03G008300/Glyma.02G093500/Glyma.05G020500/Glyma.19G233400/Glyma.19G175600/Glyma.03G174900/Glyma.10G046400/Glyma.15G152100/Glyma.20G238000/Glyma.04G148300/Glyma.02G078500/Glyma.13G134500/Glyma.05G168300…	59
0 h	00071	Fatty acid degradation	34/3564	89/14423	0.00321548	0.0166803	0.011635	Glyma.09G042000/Glyma.12G120300/Glyma.15G150900/Glyma.17G091000/Glyma.11G122500/Glyma.13G030400/Glyma.10G249700/Glyma.20G077000/Glyma.09G161600/Glyma.11G254100/Glyma.11G017900/Glyma.02G274100/Glyma.20G143900/Glyma.10G124700/Glyma.04G240800/Glyma.02G051500/Glyma.20G060300/Glyma.06G183900/Glyma.14G152100/Glyma.14G042000/Glyma.11G035200/Glyma.02G034000/Glyma.05G180100/Glyma.07G149400/Glyma.01G031500…	34
0 h	00062	Fatty acid elongation	20/3564	46/14423	0.0040598	0.0198214	0.013826	Glyma.17G251000/Glyma.18G232000/Glyma.02G273300/Glyma.06G058500/Glyma.09G260200/Glyma.03G260300/Glyma.01G207200/Glyma.08G279700/Glyma.20G115500/Glyma.08G261100/Glyma.04G057800/Glyma.18G146900/Glyma.18G011500/Glyma.11G144809/Glyma.10G179400/Glyma.10G274400/Glyma.10G001800/Glyma.20G210900/Glyma.10G291700/Glyma.02G001500	20
0 h	00565	Ether lipid metabolism	20/3564	46/14423	0.0040598	0.0198214	0.013826	Glyma.04G033600/Glyma.07G080400/Glyma.06G169100/Glyma.02G093500/Glyma.15G152100/Glyma.20G238000/Glyma.05G168300/Glyma.11G178400/Glyma.19G132900/Glyma.06G033800/Glyma.06G061500/Glyma.01G215100/Glyma.03G130900/Glyma.06G020500/Glyma.18G288600/Glyma.02G190000/Glyma.13G364900/Glyma.18G265800/Glyma.03G092800/Glyma.16G081200	20
0 h	00562	Inositol phosphate metabolism	39/3564	107/14423	0.00441689	0.0209487	0.0146123	Glyma.04G213400/Glyma.20G013500/Glyma.05G169400/Glyma.08G276400/Glyma.06G169100/Glyma.10G059500/Glyma.06G109400/Glyma.08G186400/Glyma.10G060000/Glyma.07G045600/Glyma.06G218300/Glyma.04G253100/Glyma.04G088000/Glyma.20G173200/Glyma.15G046400/Glyma.08G127700/Glyma.14G059200/Glyma.11G178400/Glyma.10G255000/Glyma.05G197200/Glyma.04G009800/Glyma.07G013900/Glyma.18G027200/Glyma.02G257200/Glyma.11G230000…	39
0 h	00130	Ubiquinone and other terpenoid-quinone biosynthesis	30/3564	78/14423	0.00485237	0.0223748	0.015607	Glyma.12G161500/Glyma.02G143700/Glyma.11G194500/Glyma.07G188200/Glyma.20G114200/Glyma.12G216900/Glyma.01G177600/Glyma.15G001700/Glyma.13G284200/Glyma.14G205200/Glyma.15G064700/Glyma.13G095600/Glyma.01G232400/Glyma.15G130500/Glyma.02G236500/Glyma.17G064600/Glyma.18G139700/Glyma.09G024500/Glyma.02G002000/Glyma.11G010500/Glyma.11G120200/Glyma.08G061200/Glyma.12G045300/Glyma.08G285500/Glyma.09G222800…	30
0 h	04146	Peroxisome	49/3564	142/14423	0.00547964	0.0240835	0.0167989	Glyma.12G120300/Glyma.15G213100/Glyma.15G083100/Glyma.11G122500/Glyma.03G119400/Glyma.15G111500/Glyma.14G207700/Glyma.20G004600/Glyma.17G089700/Glyma.15G266700/Glyma.03G018700/Glyma.07G080200/Glyma.13G340300/Glyma.10G249700/Glyma.08G237400/Glyma.20G077000/Glyma.05G141400/Glyma.02G241200/Glyma.11G254100/Glyma.11G017900/Glyma.14G223500/Glyma.14G211000/Glyma.20G143900/Glyma.10G124700/Glyma.09G007100…	49
0 h	00945	Stilbenoid, diarylheptanoid and gingerol biosynthesis	17/3564	38/14423	0.0055131	0.0240835	0.0167989	Glyma.20G114200/Glyma.03G122000/Glyma.18G103500/Glyma.14G205200/Glyma.10G060700/Glyma.19G126000/Glyma.02G236500/Glyma.07G214700/Glyma.07G021600/Glyma.08G220200/Glyma.17G171100/Glyma.18G104000/Glyma.01G187700/Glyma.13G371000/Glyma.02G103500/Glyma.05G147000/Glyma.18G113100	17
0 h	00199	Cytochrome P450	34/3564	92/14423	0.00589963	0.0251112	0.0175158	Glyma.07G162900/Glyma.02G256800/Glyma.13G147500/Glyma.11G228900/Glyma.09G252800/Glyma.20G114200/Glyma.07G110900/Glyma.17G118100/Glyma.03G122000/Glyma.14G059900/Glyma.08G365000/Glyma.12G191400/Glyma.14G205200/Glyma.19G126000/Glyma.02G236500/Glyma.18G297200/Glyma.13G217400/Glyma.05G021800/Glyma.11G074100/Glyma.18G239900/Glyma.16G089700/Glyma.16G089900/Glyma.17G246500/Glyma.19G162100/Glyma.10G202400…	34
0 h	09194	Poorly characterized	25/3564	63/14423	0.00608559	0.0252552	0.0176162	Glyma.01G161700/Glyma.03G066000/Glyma.12G191200/Glyma.08G019500/Glyma.13G107800/Glyma.05G213000/Glyma.13G113900/Glyma.17G069700/Glyma.06G293500/Glyma.07G271000/Glyma.08G300800/Glyma.17G054200/Glyma.11G082000/Glyma.11G131700/Glyma.17G051500/Glyma.20G213200/Glyma.17G045900/Glyma.20G164100/Glyma.20G247000/Glyma.10G229000/Glyma.10G177000/Glyma.01G093200/Glyma.11G110000/Glyma.12G036900/Glyma.07G273000	25
0 h	00920	Sulfur metabolism	23/3564	58/14423	0.00839291	0.0339811	0.0237027	Glyma.09G235400/Glyma.19G242300/Glyma.16G027700/Glyma.18G234600/Glyma.16G040900/Glyma.07G261500/Glyma.11G254300/Glyma.20G148100/Glyma.03G244800/Glyma.13G244900/Glyma.10G159800/Glyma.02G138400/Glyma.20G228900/Glyma.05G105300/Glyma.18G261600/Glyma.20G151500/Glyma.18G080000/Glyma.16G118800/Glyma.11G084100/Glyma.01G160000/Glyma.15G068800/Glyma.10G159700/Glyma.14G014700	23
4 h	09159	Environmental adaptation	206/3900	467/14423	5.8434e-16	9.64161e-14	7.07359e-14	Glyma.08G180800/Glyma.09G128800/Glyma.05G067300/Glyma.06G189600/Glyma.04G203200/Glyma.05G123200/Glyma.20G054500/Glyma.17G163700/Glyma.08G360600/Glyma.05G104200/Glyma.06G223800/Glyma.17G039800/Glyma.17G102200/Glyma.11G072100/Glyma.14G006800/Glyma.11G018700/Glyma.20G249600/Glyma.15G051600/Glyma.18G166800/Glyma.06G176900/Glyma.17G251000/Glyma.06G196200/Glyma.11G113500/Glyma.14G074300/Glyma.15G055100…	206
4 h	04626	Plant-pathogen interaction	170/3900	368/14423	1.31362e-15	1.08373e-13	7.95084e-14	Glyma.08G180800/Glyma.09G128800/Glyma.06G189600/Glyma.04G203200/Glyma.05G123200/Glyma.20G054500/Glyma.08G360600/Glyma.06G223800/Glyma.17G039800/Glyma.11G072100/Glyma.14G006800/Glyma.20G249600/Glyma.15G051600/Glyma.18G166800/Glyma.06G176900/Glyma.17G251000/Glyma.11G113500/Glyma.14G074300/Glyma.15G055100/Glyma.08G316500/Glyma.02G138800/Glyma.08G319300/Glyma.15G048600/Glyma.12G039400/Glyma.16G128600…	170
4 h	00194	Photosynthesis proteins	82/3900	142/14423	1.07511e-14	5.91313e-13	4.33818e-13	Glyma.02G141700/Glyma.12G202500/Glyma.03G262300/Glyma.10G032200/Glyma.12G169600/Glyma.14G008000/Glyma.02G309500/Glyma.11G061300/Glyma.07G047600/Glyma.04G112800/Glyma.06G277600/Glyma.15G016300/Glyma.05G112100/Glyma.10G177200/Glyma.11G245400/Glyma.20G144700/Glyma.06G150300/Glyma.16G205200/Glyma.04G215800/Glyma.10G278900/Glyma.18G241700/Glyma.11G077600/Glyma.10G249000/Glyma.10G040600/Glyma.06G321900…	82
4 h	00195	Photosynthesis	64/3900	108/14423	1.77783e-12	7.33354e-11	5.38027e-11	Glyma.02G141700/Glyma.12G202500/Glyma.10G032200/Glyma.12G169600/Glyma.11G061300/Glyma.04G112800/Glyma.15G016300/Glyma.05G112100/Glyma.11G245400/Glyma.20G144700/Glyma.06G150300/Glyma.04G215800/Glyma.10G278900/Glyma.18G241700/Glyma.11G077600/Glyma.10G249000/Glyma.10G040600/Glyma.06G321900/Glyma.15G107900/Glyma.12G199400/Glyma.20G098500/Glyma.10G042100/Glyma.07G019700/Glyma.13G129400/Glyma.03G114600…	64
4 h	04031	GTP-binding proteins	82/3900	180/14423	6.56442e-08	2.16626e-06	1.58928e-06	Glyma.16G001700/Glyma.04G069300/Glyma.08G285600/Glyma.05G191800/Glyma.02G094100/Glyma.12G065600/Glyma.13G094000/Glyma.06G023300/Glyma.06G070700/Glyma.13G333500/Glyma.11G241300/Glyma.15G104200/Glyma.17G032000/Glyma.03G110200/Glyma.11G209354/Glyma.15G122300/Glyma.11G040400/Glyma.02G244500/Glyma.18G287600/Glyma.13G208600/Glyma.07G202900/Glyma.19G219200/Glyma.17G151600/Glyma.09G016700/Glyma.12G212400…	82
4 h	09191	Unclassified: metabolism	161/3900	415/14423	8.40311e-08	2.31085e-06	1.69536e-06	Glyma.19G175900/Glyma.13G258500/Glyma.17G125500/Glyma.17G063000/Glyma.07G174800/Glyma.18G142500/Glyma.02G078600/Glyma.09G015400/Glyma.18G027400/Glyma.07G222400/Glyma.02G049400/Glyma.02G290800/Glyma.15G100700/Glyma.07G066700/Glyma.13G096500/Glyma.02G227700/Glyma.19G239400/Glyma.10G187300/Glyma.07G228300/Glyma.06G175900/Glyma.05G042700/Glyma.20G031600/Glyma.11G220100/Glyma.18G097000/Glyma.19G061900…	161
4 h	99980	Enzymes with EC numbers	156/3900	402/14423	1.30519e-07	3.07651e-06	2.25709e-06	Glyma.19G175900/Glyma.13G258500/Glyma.17G125500/Glyma.17G063000/Glyma.07G174800/Glyma.18G142500/Glyma.02G078600/Glyma.09G015400/Glyma.18G027400/Glyma.07G222400/Glyma.02G049400/Glyma.02G290800/Glyma.15G100700/Glyma.13G096500/Glyma.02G227700/Glyma.19G239400/Glyma.07G228300/Glyma.06G175900/Glyma.05G042700/Glyma.20G031600/Glyma.11G220100/Glyma.18G097000/Glyma.19G061900/Glyma.04G166100/Glyma.05G138700…	156
4 h	00630	Glyoxylate and dicarboxylate metabolism	58/3900	118/14423	2.34087e-07	4.82804e-06	3.5421e-06	Glyma.14G184500/Glyma.19G130800/Glyma.19G107300/Glyma.03G128300/Glyma.08G108900/Glyma.09G004700/Glyma.14G207700/Glyma.07G019900/Glyma.13G361400/Glyma.08G311200/Glyma.14G026400/Glyma.20G019600/Glyma.07G221300/Glyma.08G157700/Glyma.05G141400/Glyma.15G016100/Glyma.07G185400/Glyma.07G081900/Glyma.01G026700/Glyma.16G028700/Glyma.14G223500/Glyma.11G042200/Glyma.06G017900/Glyma.15G012500/Glyma.17G161900…	58
4 h	04016	MAPK signaling pathway - plant	90/3900	208/14423	2.84159e-07	5.20958e-06	3.82202e-06	Glyma.08G180800/Glyma.20G221800/Glyma.04G203200/Glyma.05G123200/Glyma.15G031800/Glyma.14G066400/Glyma.08G005100/Glyma.15G051600/Glyma.17G178800/Glyma.02G138800/Glyma.02G250200/Glyma.20G009600/Glyma.01G204200/Glyma.15G048600/Glyma.02G208500/Glyma.13G041800/Glyma.06G162300/Glyma.20G051500/Glyma.13G076700/Glyma.16G025900/Glyma.08G078200/Glyma.05G132900/Glyma.19G121900/Glyma.13G229300/Glyma.14G145920…	90
4 h	00053	Ascorbate and aldarate metabolism	38/3900	74/14423	7.40783e-06	0.000122229	8.96737e-05	Glyma.13G030400/Glyma.U031121/Glyma.19G061200/Glyma.13G057700/Glyma.11G150243/Glyma.12G073100/Glyma.05G224500/Glyma.02G292800/Glyma.06G068200/Glyma.13G076900/Glyma.17G091000/Glyma.19G028500/Glyma.20G224400/Glyma.18G265100/Glyma.10G162000/Glyma.01G031500/Glyma.06G114400/Glyma.04G009800/Glyma.17G077000/Glyma.16G073100/Glyma.11G107200/Glyma.02G051500/Glyma.14G152100/Glyma.12G032300/Glyma.07G013900/G…	38
4 h	00903	Limonene and pinene degradation	14/3900	18/14423	1.05684e-05	0.000158526	0.000116303	Glyma.13G030400/Glyma.17G091000/Glyma.01G031500/Glyma.02G051500/Glyma.14G152100/Glyma.06G183900/Glyma.13G340000/Glyma.13G170600/Glyma.02G034000/Glyma.06G114300/Glyma.04G248500/Glyma.16G131700/Glyma.12G057400/Glyma.15G034400	14
4 h	00906	Carotenoid biosynthesis	28/3900	51/14423	2.35597e-05	0.000323945	0.000237663	Glyma.11G253000/Glyma.02G272200/Glyma.11G252500/Glyma.19G251000/Glyma.09G252800/Glyma.19G131400/Glyma.10G086700/Glyma.20G227900/Glyma.17G174500/Glyma.03G128900/Glyma.18G111900/Glyma.05G140900/Glyma.15G172200/Glyma.14G045100/Glyma.08G306200/Glyma.09G066200/Glyma.14G209700/Glyma.01G154900/Glyma.18G239900/Glyma.10G231200/Glyma.11G151700/Glyma.10G031100/Glyma.19G160300/Glyma.08G176300/Glyma.01G073200…	28
4 h	00710	Carbon fixation in photosynthetic organisms	51/3900	116/14423	6.12929e-05	0.000777948	0.000570744	Glyma.03G102900/Glyma.10G268500/Glyma.10G197700/Glyma.07G074700/Glyma.07G045900/Glyma.03G246300/Glyma.13G270400/Glyma.03G191500/Glyma.08G067500/Glyma.07G182300/Glyma.20G192200/Glyma.05G025300/Glyma.10G059500/Glyma.20G166400/Glyma.09G210900/Glyma.10G293500/Glyma.07G185400/Glyma.19G243800/Glyma.18G030400/Glyma.16G044900/Glyma.01G026700/Glyma.01G010200/Glyma.10G205500/Glyma.16G077800/Glyma.20G122500…	51
4 h	00062	Fatty acid elongation	25/3900	46/14423	8.00728e-05	0.000943715	0.000692359	Glyma.02G273300/Glyma.01G207200/Glyma.17G251000/Glyma.14G074300/Glyma.09G260200/Glyma.18G011600/Glyma.18G232000/Glyma.20G115500/Glyma.11G245600/Glyma.06G058500/Glyma.03G260300/Glyma.08G279700/Glyma.04G149300/Glyma.08G261100/Glyma.04G057800/Glyma.18G011500/Glyma.18G146900/Glyma.20G210900/Glyma.15G042500/Glyma.11G144809/Glyma.10G179400/Glyma.10G291700/Glyma.10G001800/Glyma.10G274400/Glyma.02G001500	25
4 h	09109	Metabolism of terpenoids and polyketides	111/3900	309/14423	0.000337361	0.00371097	0.00272256	Glyma.04G237000/Glyma.12G046000/Glyma.02G256800/Glyma.02G273100/Glyma.13G030400/Glyma.11G253000/Glyma.02G272200/Glyma.18G118100/Glyma.11G252500/Glyma.20G058000/Glyma.19G187500/Glyma.19G236200/Glyma.19G251000/Glyma.09G252800/Glyma.19G131400/Glyma.02G059000/Glyma.10G086700/Glyma.20G227900/Glyma.06G038700/Glyma.08G093400/Glyma.17G174500/Glyma.11G228900/Glyma.13G262200/Glyma.07G073800/Glyma.03G128900…	111
4 h	00410	beta-Alanine metabolism	39/3900	89/14423	0.000466226	0.00480795	0.00352737	Glyma.13G030400/Glyma.08G307800/Glyma.09G168900/Glyma.07G151500/Glyma.07G183600/Glyma.15G055500/Glyma.09G227500/Glyma.18G116300/Glyma.17G091000/Glyma.16G080900/Glyma.18G109900/Glyma.14G211100/Glyma.01G031500/Glyma.08G303800/Glyma.01G062400/Glyma.11G035200/Glyma.05G180100/Glyma.02G038500/Glyma.18G043600/Glyma.02G051500/Glyma.14G152100/Glyma.16G218500/Glyma.06G183900/Glyma.13G340000/Glyma.13G170600…	39
4 h	00520	Amino sugar and nucleotide sugar metabolism	92/3900	258/14423	0.00135066	0.0130378	0.00956518	Glyma.16G200600/Glyma.03G159200/Glyma.11G141300/Glyma.05G222000/Glyma.11G015800/Glyma.09G017000/Glyma.08G086700/Glyma.07G081600/Glyma.11G141200/Glyma.19G050100/Glyma.06G205900/Glyma.17G257800/Glyma.18G229800/Glyma.02G095200/Glyma.03G006900/Glyma.10G018400/Glyma.01G063000/Glyma.06G030400/Glyma.19G038000/Glyma.01G139500/Glyma.18G208900/Glyma.15G051500/Glyma.09G030300/Glyma.09G280100/Glyma.12G180300…	92
4 h	00591	Linoleic acid metabolism	22/3900	45/14423	0.0014223	0.0130378	0.00956518	Glyma.02G190000/Glyma.19G132900/Glyma.13G239000/Glyma.03G130900/Glyma.16G008700/Glyma.07G039900/Glyma.20G144600/Glyma.10G249100/Glyma.07G034800/Glyma.07G034900/Glyma.15G026400/Glyma.13G030300/Glyma.12G054700/Glyma.19G263300/Glyma.07G007000/Glyma.11G130200/Glyma.15G026500/Glyma.03G264300/Glyma.13G347700/Glyma.07G006900/Glyma.11G130300/Glyma.07G196800	22
4 h	00051	Fructose and mannose metabolism	48/3900	121/14423	0.00165189	0.0143454	0.0105245	Glyma.16G200600/Glyma.11G015800/Glyma.19G050100/Glyma.10G268500/Glyma.17G257800/Glyma.18G229800/Glyma.18G208900/Glyma.03G191500/Glyma.18G060600/Glyma.09G280100/Glyma.08G067500/Glyma.12G051800/Glyma.07G182300/Glyma.10G059500/Glyma.20G153900/Glyma.05G226600/Glyma.20G166400/Glyma.01G167500/Glyma.14G072600/Glyma.16G220300/Glyma.10G194300/Glyma.14G218800/Glyma.12G204700/Glyma.20G122500/Glyma.07G126400…	48
4 h	00430	Taurine and hypotaurine metabolism	9/3900	13/14423	0.00181424	0.0149675	0.0109809	Glyma.18G021100/Glyma.09G168900/Glyma.14G211100/Glyma.18G043600/Glyma.16G218500/Glyma.07G126200/Glyma.11G213000/Glyma.05G136100/Glyma.08G091400	9
4 h	00196	Photosynthesis - antenna proteins	17/3900	33/14423	0.00239586	0.0188246	0.0138107	Glyma.03G262300/Glyma.14G008000/Glyma.02G309500/Glyma.07G047600/Glyma.10G177200/Glyma.16G205200/Glyma.02G064700/Glyma.16G016100/Glyma.06G194900/Glyma.18G028400/Glyma.14G003400/Glyma.04G167900/Glyma.11G228800/Glyma.15G179400/Glyma.09G071400/Glyma.17G262400/Glyma.06G039700	17
4 h	04146	Peroxisome	54/3900	142/14423	0.00268196	0.0201147	0.0147572	Glyma.20G077000/Glyma.03G250100/Glyma.07G219300/Glyma.17G009400/Glyma.03G018700/Glyma.05G037400/Glyma.15G109800/Glyma.11G017900/Glyma.16G153900/Glyma.20G143900/Glyma.08G160500/Glyma.14G207700/Glyma.17G089700/Glyma.20G004600/Glyma.19G236200/Glyma.07G151500/Glyma.11G254100/Glyma.15G213100/Glyma.08G237400/Glyma.03G119400/Glyma.20G060300/Glyma.13G346400/Glyma.14G211000/Glyma.15G083100/Glyma.04G076300…	54
4 h	00592	alpha-Linolenic acid metabolism	39/3900	98/14423	0.00401631	0.0287236	0.0210732	Glyma.20G077000/Glyma.07G151500/Glyma.11G122700/Glyma.02G190000/Glyma.07G162900/Glyma.12G191400/Glyma.17G050000/Glyma.19G132900/Glyma.13G239000/Glyma.10G124700/Glyma.03G130900/Glyma.16G008700/Glyma.02G099200/Glyma.04G240800/Glyma.07G039900/Glyma.11G035200/Glyma.05G180100/Glyma.14G223200/Glyma.04G035000/Glyma.17G246500/Glyma.01G235600/Glyma.17G209900/Glyma.13G109700/Glyma.19G044900/Glyma.13G047300…	39
4 h	99997	Function unknown	23/3900	51/14423	0.00417798	0.0287236	0.0210732	Glyma.08G019500/Glyma.01G161700/Glyma.11G082000/Glyma.11G131700/Glyma.13G107800/Glyma.05G213000/Glyma.03G066000/Glyma.20G249100/Glyma.17G054200/Glyma.08G300800/Glyma.13G111600/Glyma.16G205600/Glyma.17G051500/Glyma.06G293500/Glyma.12G191200/Glyma.20G164100/Glyma.20G247000/Glyma.11G110000/Glyma.10G229000/Glyma.20G213200/Glyma.10G177000/Glyma.12G036900/Glyma.07G273000	23
4 h	00561	Glycerolipid metabolism	45/3900	117/14423	0.00453257	0.029915	0.0219472	Glyma.03G139700/Glyma.13G134500/Glyma.13G030400/Glyma.12G045700/Glyma.06G220300/Glyma.09G160400/Glyma.13G361400/Glyma.05G196100/Glyma.01G113000/Glyma.02G190000/Glyma.13G093100/Glyma.09G207900/Glyma.09G263300/Glyma.19G132900/Glyma.06G299200/Glyma.03G130900/Glyma.07G069700/Glyma.17G091000/Glyma.13G101400/Glyma.12G200100/Glyma.15G012500/Glyma.03G174900/Glyma.01G031500/Glyma.18G197600/Glyma.17G248200…	45
4 h	00945	Stilbenoid, diarylheptanoid and gingerol biosynthesis	18/3900	38/14423	0.00575778	0.0364235	0.0267222	Glyma.03G122000/Glyma.02G069100/Glyma.10G060700/Glyma.07G021600/Glyma.14G205200/Glyma.02G236500/Glyma.19G126000/Glyma.20G114200/Glyma.07G214700/Glyma.08G220200/Glyma.13G371000/Glyma.18G104000/Glyma.02G103500/Glyma.01G187700/Glyma.11G054500/Glyma.17G171100/Glyma.08G311500/Glyma.18G113100	18
4 h	00920	Sulfur metabolism	25/3900	58/14423	0.00596021	0.0364235	0.0267222	Glyma.08G086800/Glyma.19G242300/Glyma.18G080000/Glyma.18G261600/Glyma.02G299100/Glyma.15G066900/Glyma.02G138400/Glyma.17G161100/Glyma.07G261500/Glyma.16G040900/Glyma.11G254300/Glyma.16G027700/Glyma.03G244800/Glyma.20G148100/Glyma.18G234600/Glyma.05G105300/Glyma.20G151500/Glyma.13G244900/Glyma.20G228900/Glyma.10G159800/Glyma.11G084100/Glyma.01G160000/Glyma.15G068800/Glyma.10G159700/Glyma.14G014700	25
4 h	00650	Butanoate metabolism	17/3900	36/14423	0.00748283	0.0440953	0.0323506	Glyma.09G168900/Glyma.11G096200/Glyma.17G132300/Glyma.16G200200/Glyma.16G028700/Glyma.06G254700/Glyma.14G036600/Glyma.07G235400/Glyma.14G211100/Glyma.07G059800/Glyma.20G043000/Glyma.18G043600/Glyma.16G218500/Glyma.02G277900/Glyma.11G213000/Glyma.05G136100/Glyma.08G091400	17
8 h	09159	Environmental adaptation	199/3553	467/14423	3.83797e-18	6.33264e-16	4.88836e-16	Glyma.01G223200/Glyma.17G039800/Glyma.06G103200/Glyma.08G360600/Glyma.06G108900/Glyma.17G251000/Glyma.06G223800/Glyma.04G203200/Glyma.09G056100/Glyma.05G011100/Glyma.06G320700/Glyma.20G090000/Glyma.11G148362/Glyma.15G051600/Glyma.08G180800/Glyma.14G216300/Glyma.02G236800/Glyma.14G165700/Glyma.05G198700/Glyma.16G099600/Glyma.04G157200/Glyma.12G073900/Glyma.12G039400/Glyma.06G196200/Glyma.04G204400…	199
8 h	01001	Protein kinases	190/3553	454/14423	2.12045e-16	1.74937e-14	1.35039e-14	Glyma.01G223200/Glyma.17G039800/Glyma.15G269800/Glyma.05G157200/Glyma.14G164400/Glyma.08G360600/Glyma.06G108900/Glyma.01G149000/Glyma.20G066900/Glyma.08G102600/Glyma.18G106800/Glyma.09G215000/Glyma.11G123500/Glyma.17G053500/Glyma.09G212900/Glyma.05G145800/Glyma.16G104600/Glyma.05G006700/Glyma.01G157800/Glyma.14G083100/Glyma.07G125200/Glyma.08G005100/Glyma.12G166100/Glyma.20G076300/Glyma.05G202000…	190
8 h	04626	Plant-pathogen interaction	157/3553	368/14423	1.28716e-14	7.0794e-13	5.4648e-13	Glyma.01G223200/Glyma.17G039800/Glyma.08G360600/Glyma.06G108900/Glyma.17G251000/Glyma.06G223800/Glyma.04G203200/Glyma.05G011100/Glyma.06G320700/Glyma.15G051600/Glyma.08G180800/Glyma.14G216300/Glyma.02G236800/Glyma.14G165700/Glyma.05G198700/Glyma.16G099600/Glyma.04G157200/Glyma.12G039400/Glyma.04G204400/Glyma.08G078200/Glyma.01G068000/Glyma.10G009100/Glyma.02G048300/Glyma.18G101100/Glyma.11G077300…	157
8 h	99980	Enzymes with EC numbers	155/3553	402/14423	2.5786e-10	1.06367e-08	8.21082e-09	Glyma.02G049400/Glyma.03G069700/Glyma.06G175900/Glyma.07G174800/Glyma.05G042700/Glyma.04G135000/Glyma.04G095500/Glyma.19G239400/Glyma.08G089700/Glyma.20G031600/Glyma.14G182100/Glyma.14G097800/Glyma.19G013800/Glyma.19G115400/Glyma.15G167500/Glyma.12G205800/Glyma.13G069100/Glyma.20G019100/Glyma.19G061900/Glyma.02G129500/Glyma.13G253800/Glyma.04G093600/Glyma.08G139100/Glyma.06G208900/Glyma.17G125500…	155
8 h	09191	Unclassified: metabolism	156/3553	415/14423	1.90421e-09	6.28389e-08	4.85072e-08	Glyma.02G049400/Glyma.03G069700/Glyma.06G175900/Glyma.07G174800/Glyma.05G042700/Glyma.04G135000/Glyma.04G095500/Glyma.19G239400/Glyma.08G089700/Glyma.20G031600/Glyma.14G182100/Glyma.14G097800/Glyma.19G013800/Glyma.19G115400/Glyma.15G167500/Glyma.12G205800/Glyma.13G069100/Glyma.20G019100/Glyma.19G061900/Glyma.02G129500/Glyma.13G253800/Glyma.04G093600/Glyma.08G139100/Glyma.06G208900/Glyma.17G125500…	156
8 h	01003	Glycosyltransferases	123/3553	320/14423	2.25033e-08	6.1884e-07	4.77701e-07	Glyma.13G370500/Glyma.18G085100/Glyma.11G243000/Glyma.06G240600/Glyma.08G288600/Glyma.20G167900/Glyma.10G062200/Glyma.13G269200/Glyma.10G270800/Glyma.19G254500/Glyma.08G309900/Glyma.05G187300/Glyma.16G165900/Glyma.08G308700/Glyma.02G086200/Glyma.06G034800/Glyma.08G348000/Glyma.06G292500/Glyma.08G324900/Glyma.03G159200/Glyma.19G028100/Glyma.12G201500/Glyma.02G080900/Glyma.14G104100/Glyma.07G172000…	123
8 h	04016	MAPK signaling pathway - plant	83/3553	208/14423	7.15836e-07	1.68733e-05	1.3025e-05	Glyma.02G250200/Glyma.06G108900/Glyma.13G076700/Glyma.15G031800/Glyma.07G056900/Glyma.04G203200/Glyma.08G005100/Glyma.03G216700/Glyma.15G051600/Glyma.08G180800/Glyma.14G165700/Glyma.05G198700/Glyma.17G178800/Glyma.08G078200/Glyma.14G223500/Glyma.13G145100/Glyma.20G009600/Glyma.16G009300/Glyma.13G151100/Glyma.14G108400/Glyma.19G191600/Glyma.01G124700/Glyma.14G066400/Glyma.09G002600/Glyma.05G123200…	83
8 h	00630	Glyoxylate and dicarboxylate metabolism	53/3553	118/14423	1.13846e-06	2.34808e-05	1.81255e-05	Glyma.13G046200/Glyma.13G349100/Glyma.11G080600/Glyma.09G173200/Glyma.07G185400/Glyma.01G199700/Glyma.14G026400/Glyma.14G223500/Glyma.09G015500/Glyma.05G060500/Glyma.11G042200/Glyma.05G141400/Glyma.15G016100/Glyma.13G308700/Glyma.07G081900/Glyma.02G244000/Glyma.02G288500/Glyma.03G128300/Glyma.04G017500/Glyma.12G193800/Glyma.08G157700/Glyma.09G247900/Glyma.15G012500/Glyma.14G184500/Glyma.17G012000…	53
8 h	00561	Glycerolipid metabolism	50/3553	117/14423	1.26194e-05	0.000231355	0.00017859	Glyma.06G039200/Glyma.09G119200/Glyma.12G045700/Glyma.17G067400/Glyma.14G104100/Glyma.06G220300/Glyma.09G263300/Glyma.19G175600/Glyma.14G077500/Glyma.18G197600/Glyma.01G113000/Glyma.10G046400/Glyma.17G091000/Glyma.17G248200/Glyma.03G174900/Glyma.09G207900/Glyma.15G012500/Glyma.13G101400/Glyma.13G134500/Glyma.09G160400/Glyma.05G196100/Glyma.03G008300/Glyma.13G093100/Glyma.19G132900/Glyma.06G183900…	50
8 h	00280	Valine, leucine and isoleucine degradation	41/3553	91/14423	1.6393e-05	0.000270484	0.000208795	Glyma.16G200200/Glyma.05G063900/Glyma.12G071100/Glyma.19G128600/Glyma.09G042000/Glyma.02G131500/Glyma.11G154423/Glyma.07G019100/Glyma.07G213500/Glyma.10G124700/Glyma.01G129400/Glyma.09G148500/Glyma.20G077000/Glyma.10G028700/Glyma.08G307800/Glyma.08G276400/Glyma.03G117300/Glyma.17G091000/Glyma.08G204300/Glyma.01G103100/Glyma.15G150900/Glyma.03G070200/Glyma.16G080900/Glyma.07G235400/Glyma.14G036600…	41
8 h	00053	Ascorbate and aldarate metabolism	35/3553	74/14423	1.86453e-05	0.000279679	0.000215893	Glyma.08G243000/Glyma.11G150243/Glyma.18G092900/Glyma.20G224400/Glyma.17G091000/Glyma.19G061200/Glyma.10G162000/Glyma.04G009800/Glyma.06G114400/Glyma.02G292800/Glyma.06G068200/Glyma.12G032300/Glyma.05G022600/Glyma.11G107200/Glyma.06G183900/Glyma.13G057700/Glyma.14G152100/Glyma.19G028500/Glyma.18G265100/Glyma.02G051500/Glyma.13G076900/Glyma.16G073100/Glyma.01G031500/Glyma.13G170600/Glyma.05G224500…	35
8 h	01009	Protein phosphatases and associated proteins	152/3553	460/14423	2.28407e-05	0.00031406	0.000242432	Glyma.18G199400/Glyma.10G166500/Glyma.02G170500/Glyma.09G037900/Glyma.05G021400/Glyma.09G023200/Glyma.08G195200/Glyma.20G066900/Glyma.06G039200/Glyma.19G082900/Glyma.20G218400/Glyma.11G004600/Glyma.07G148100/Glyma.01G038800/Glyma.06G088900/Glyma.08G257900/Glyma.14G101400/Glyma.18G282300/Glyma.14G017800/Glyma.18G145500/Glyma.09G195800/Glyma.02G295600/Glyma.14G059000/Glyma.07G053500/Glyma.02G257400…	152
8 h	00903	Limonene and pinene degradation	13/3553	18/14423	2.85358e-05	0.000362185	0.000279581	Glyma.17G091000/Glyma.06G183900/Glyma.14G152100/Glyma.02G051500/Glyma.01G031500/Glyma.13G170600/Glyma.13G340000/Glyma.02G034000/Glyma.04G248500/Glyma.15G034400/Glyma.06G114300/Glyma.16G131700/Glyma.12G057400	13
8 h	00410	beta-Alanine metabolism	39/3553	89/14423	5.62642e-05	0.000663113	0.000511877	Glyma.06G285400/Glyma.02G282000/Glyma.15G111500/Glyma.18G116300/Glyma.08G307800/Glyma.08G276400/Glyma.09G007100/Glyma.14G032300/Glyma.03G117300/Glyma.17G091000/Glyma.16G080900/Glyma.08G282800/Glyma.09G227500/Glyma.18G109900/Glyma.16G218500/Glyma.06G183900/Glyma.05G180100/Glyma.14G152100/Glyma.02G051500/Glyma.18G043600/Glyma.01G031500/Glyma.13G170600/Glyma.11G035200/Glyma.02G278600/Glyma.08G303800…	39
8 h	04712	Circadian rhythm - plant	42/3553	99/14423	7.42455e-05	0.000816701	0.000630436	Glyma.06G103200/Glyma.09G056100/Glyma.20G090000/Glyma.11G148362/Glyma.12G073900/Glyma.06G196200/Glyma.13G135900/Glyma.05G067100/Glyma.11G018700/Glyma.11G050000/Glyma.20G209900/Glyma.10G048100/Glyma.04G050200/Glyma.19G224200/Glyma.07G058200/Glyma.04G166300/Glyma.16G163200/Glyma.10G221500/Glyma.08G197500/Glyma.01G192100/Glyma.16G017400/Glyma.20G170000/Glyma.07G048500/Glyma.05G025000/Glyma.17G102200…	42
8 h	00591	Linoleic acid metabolism	23/3553	45/14423	0.000113602	0.00117152	0.00090433	Glyma.08G102900/Glyma.07G039900/Glyma.16G008700/Glyma.19G132900/Glyma.02G190000/Glyma.03G130900/Glyma.19G263300/Glyma.20G144600/Glyma.07G034900/Glyma.12G054700/Glyma.07G196800/Glyma.10G249100/Glyma.07G034800/Glyma.11G130200/Glyma.03G264300/Glyma.13G030300/Glyma.15G026400/Glyma.07G007000/Glyma.U039300/Glyma.15G026500/Glyma.11G130300/Glyma.07G006900/Glyma.13G347700	23
8 h	04040	Ion channels	38/3553	89/14423	0.000136396	0.00132385	0.00102192	Glyma.06G223800/Glyma.11G004600/Glyma.12G194100/Glyma.04G157200/Glyma.13G308500/Glyma.01G193700/Glyma.13G308400/Glyma.16G111700/Glyma.06G016000/Glyma.18G263900/Glyma.14G161600/Glyma.09G168700/Glyma.06G077600/Glyma.07G056400/Glyma.13G161800/Glyma.05G077100/Glyma.06G126600/Glyma.02G299700/Glyma.19G221000/Glyma.03G257000/Glyma.12G204400/Glyma.14G014100/Glyma.13G296900/Glyma.11G087100/Glyma.01G157900…	38
8 h	00071	Fatty acid degradation	37/3553	89/14423	0.000316585	0.00290203	0.00224016	Glyma.09G042000/Glyma.06G285400/Glyma.02G274100/Glyma.02G274000/Glyma.10G124700/Glyma.10G249700/Glyma.14G156400/Glyma.11G254100/Glyma.11G017900/Glyma.20G077000/Glyma.11G122500/Glyma.17G091000/Glyma.09G161600/Glyma.15G150900/Glyma.04G240800/Glyma.20G143900/Glyma.05G151200/Glyma.06G183900/Glyma.05G180100/Glyma.14G152100/Glyma.02G051500/Glyma.01G031500/Glyma.13G170600/Glyma.11G035200/Glyma.20G060300…	37
8 h	00520	Amino sugar and nucleotide sugar metabolism	86/3553	258/14423	0.000944897	0.00805649	0.00621905	Glyma.05G132100/Glyma.11G075700/Glyma.17G257800/Glyma.03G006900/Glyma.13G133800/Glyma.10G045800/Glyma.08G309900/Glyma.10G018400/Glyma.08G348000/Glyma.14G218800/Glyma.08G243000/Glyma.02G250800/Glyma.03G159200/Glyma.19G028100/Glyma.12G201500/Glyma.03G027300/Glyma.13G058100/Glyma.18G220200/Glyma.01G139500/Glyma.07G081600/Glyma.12G180300/Glyma.12G064600/Glyma.18G229800/Glyma.09G030300/Glyma.15G029800…	86
8 h	00710	Carbon fixation in photosynthetic organisms	44/3553	116/14423	0.000976545	0.00805649	0.00621905	Glyma.13G046200/Glyma.07G045900/Glyma.07G185400/Glyma.16G013900/Glyma.09G262900/Glyma.15G136200/Glyma.03G014600/Glyma.16G168000/Glyma.18G030400/Glyma.20G122500/Glyma.01G010200/Glyma.20G192200/Glyma.08G067500/Glyma.13G270400/Glyma.09G210900/Glyma.12G161300/Glyma.07G142700/Glyma.10G205500/Glyma.17G101700/Glyma.04G015900/Glyma.16G077800/Glyma.20G125200/Glyma.06G087800/Glyma.02G038100/Glyma.06G015900…	44
8 h	00564	Glycerophospholipid metabolism	60/3553	171/14423	0.00135593	0.0106538	0.00822395	Glyma.06G039200/Glyma.07G080800/Glyma.09G041400/Glyma.02G078500/Glyma.09G119200/Glyma.04G033600/Glyma.12G045700/Glyma.06G176500/Glyma.17G067400/Glyma.19G233400/Glyma.05G020500/Glyma.11G178400/Glyma.02G165500/Glyma.06G220300/Glyma.19G175600/Glyma.06G061500/Glyma.14G077500/Glyma.01G162100/Glyma.02G093500/Glyma.10G183200/Glyma.04G148300/Glyma.06G033800/Glyma.05G168300/Glyma.15G152100/Glyma.10G046400…	60
8 h	00062	Fatty acid elongation	21/3553	46/14423	0.00150344	0.0107855	0.00832566	Glyma.17G251000/Glyma.05G011100/Glyma.13G330100/Glyma.11G245600/Glyma.08G279700/Glyma.20G115500/Glyma.18G146900/Glyma.01G207200/Glyma.18G011500/Glyma.04G057800/Glyma.06G058500/Glyma.12G075100/Glyma.11G144809/Glyma.08G261100/Glyma.15G042500/Glyma.20G210900/Glyma.10G274400/Glyma.10G291700/Glyma.10G179400/Glyma.02G001500/Glyma.10G001800	21
8 h	00565	Ether lipid metabolism	21/3553	46/14423	0.00150344	0.0107855	0.00832566	Glyma.07G080800/Glyma.09G041400/Glyma.04G033600/Glyma.11G178400/Glyma.06G061500/Glyma.01G162100/Glyma.02G093500/Glyma.06G033800/Glyma.05G168300/Glyma.15G152100/Glyma.20G238000/Glyma.19G132900/Glyma.18G288600/Glyma.03G092800/Glyma.01G215100/Glyma.02G190000/Glyma.03G130900/Glyma.13G364900/Glyma.18G265800/Glyma.16G081200/Glyma.06G020500	21
8 h	00562	Inositol phosphate metabolism	40/3553	107/14423	0.00221721	0.0152433	0.0117668	Glyma.06G152800/Glyma.07G045600/Glyma.05G191200/Glyma.08G156400/Glyma.04G013900/Glyma.18G027200/Glyma.13G083400/Glyma.11G178400/Glyma.11G230000/Glyma.06G218300/Glyma.04G253100/Glyma.08G127700/Glyma.10G060000/Glyma.08G186400/Glyma.06G109400/Glyma.20G173200/Glyma.04G213400/Glyma.08G276400/Glyma.14G059200/Glyma.15G046400/Glyma.07G216600/Glyma.07G107000/Glyma.02G257200/Glyma.04G009800/Glyma.20G013500…	40
8 h	09108	Metabolism of cofactors and vitamins	138/3553	453/14423	0.00244626	0.0161453	0.0124631	Glyma.19G139300/Glyma.07G252600/Glyma.10G030600/Glyma.10G211600/Glyma.01G232400/Glyma.04G254600/Glyma.01G226700/Glyma.12G020100/Glyma.17G089200/Glyma.14G154600/Glyma.19G115900/Glyma.12G229700/Glyma.13G234000/Glyma.07G188200/Glyma.13G154600/Glyma.14G150600/Glyma.15G087200/Glyma.02G282000/Glyma.04G069600/Glyma.08G188200/Glyma.03G060100/Glyma.14G003200/Glyma.16G042000/Glyma.09G191200/Glyma.20G179400…	138
8 h	00650	Butanoate metabolism	17/3553	36/14423	0.00266174	0.0165172	0.0127501	Glyma.13G349100/Glyma.16G200200/Glyma.19G128600/Glyma.11G096200/Glyma.09G148500/Glyma.06G254700/Glyma.07G235400/Glyma.14G036600/Glyma.17G132300/Glyma.07G059800/Glyma.16G218500/Glyma.20G043000/Glyma.16G028700/Glyma.18G043600/Glyma.14G211100/Glyma.02G277900/Glyma.11G213000	17
8 h	00910	Nitrogen metabolism	25/3553	60/14423	0.00271703	0.0165172	0.0127501	Glyma.09G173200/Glyma.04G236900/Glyma.01G030500/Glyma.08G196200/Glyma.10G005200/Glyma.07G012500/Glyma.02G244000/Glyma.03G128300/Glyma.13G257200/Glyma.19G130800/Glyma.18G041100/Glyma.16G041200/Glyma.11G215500/Glyma.17G161900/Glyma.15G057700/Glyma.02G213700/Glyma.18G141900/Glyma.13G210800/Glyma.03G133600/Glyma.18G138400/Glyma.15G102000/Glyma.13G084000/Glyma.19G007700/Glyma.05G007100/Glyma.06G109200	25
8 h	00500	Starch and sucrose metabolism	77/3553	235/14423	0.00284028	0.0165172	0.0127501	Glyma.17G257800/Glyma.08G028400/Glyma.08G288600/Glyma.10G270800/Glyma.04G098900/Glyma.18G232400/Glyma.02G086200/Glyma.14G218800/Glyma.16G217900/Glyma.17G109700/Glyma.07G172000/Glyma.18G136200/Glyma.11G176400/Glyma.13G114000/Glyma.06G129400/Glyma.13G161600/Glyma.15G029800/Glyma.05G219200/Glyma.06G104800/Glyma.04G119700/Glyma.19G113600/Glyma.14G222600/Glyma.06G323700/Glyma.02G018700/Glyma.08G028900…	77
8 h	04070	Phosphatidylinositol signaling system	42/3553	115/14423	0.00290302	0.0165172	0.0127501	Glyma.06G152800/Glyma.07G045600/Glyma.05G191200/Glyma.08G156400/Glyma.04G013900/Glyma.18G027200/Glyma.17G067400/Glyma.13G083400/Glyma.11G230000/Glyma.06G218300/Glyma.18G255000/Glyma.04G253100/Glyma.10G183200/Glyma.08G127700/Glyma.13G065500/Glyma.10G060000/Glyma.08G186400/Glyma.06G109400/Glyma.20G173200/Glyma.04G213400/Glyma.14G059200/Glyma.15G046400/Glyma.07G216600/Glyma.07G107000/Glyma.02G257200…	42
8 h	00770	Pantothenate and CoA biosynthesis	30/3553	77/14423	0.00370419	0.020373	0.0157265	Glyma.04G254600/Glyma.17G089200/Glyma.13G154600/Glyma.02G282000/Glyma.02G164100/Glyma.18G116300/Glyma.01G173050/Glyma.14G032300/Glyma.17G091000/Glyma.08G028900/Glyma.15G117500/Glyma.08G285700/Glyma.05G037900/Glyma.18G139100/Glyma.06G183900/Glyma.14G152100/Glyma.02G051500/Glyma.01G031500/Glyma.13G170600/Glyma.02G278600/Glyma.08G303800/Glyma.13G340000/Glyma.14G036000/Glyma.02G034000/Glyma.04G248500…	30
8 h	00072	Synthesis and degradation of ketone bodies	8/3553	13/14423	0.00510549	0.0271744	0.0209767	Glyma.16G200200/Glyma.19G128600/Glyma.09G148500/Glyma.07G235400/Glyma.14G036600/Glyma.17G132300/Glyma.20G043000/Glyma.02G277900	8
8 h	00908	Zeatin biosynthesis	20/3553	48/14423	0.00695285	0.0358506	0.0276742	Glyma.10G062200/Glyma.18G274400/Glyma.08G365000/Glyma.20G116500/Glyma.14G099000/Glyma.15G103800/Glyma.03G187500/Glyma.02G148600/Glyma.18G297200/Glyma.15G170300/Glyma.09G063900/Glyma.12G011400/Glyma.03G151800/Glyma.03G187700/Glyma.19G187000/Glyma.19G135100/Glyma.10G025300/Glyma.03G187000/Glyma.19G187100/Glyma.09G225400	20
8 h	04146	Peroxisome	48/3553	142/14423	0.00858999	0.04295	0.0331544	Glyma.19G128600/Glyma.07G224000/Glyma.06G285400/Glyma.20G004600/Glyma.11G125400/Glyma.10G124700/Glyma.10G249700/Glyma.14G223500/Glyma.11G254100/Glyma.14G211000/Glyma.15G083100/Glyma.15G111500/Glyma.03G018700/Glyma.15G034000/Glyma.11G017900/Glyma.10G117100/Glyma.20G077000/Glyma.12G221000/Glyma.05G141400/Glyma.11G122500/Glyma.09G007100/Glyma.13G299600/Glyma.07G080200/Glyma.02G241200/Glyma.09G281200…	48
8 h	09106	Metabolism of other amino acids	110/3553	365/14423	0.00895359	0.0432132	0.0333575	Glyma.16G000200/Glyma.09G258000/Glyma.11G088200/Glyma.16G038300/Glyma.20G099600/Glyma.19G114500/Glyma.06G285400/Glyma.18G234600/Glyma.01G040000/Glyma.18G021100/Glyma.02G282000/Glyma.01G156600/Glyma.11G176400/Glyma.18G284600/Glyma.08G118900/Glyma.03G073702/Glyma.11G150243/Glyma.14G211000/Glyma.12G163700/Glyma.15G111500/Glyma.07G013800/Glyma.02G187200/Glyma.18G116300/Glyma.08G199000/Glyma.08G307800…	110
8 h	00592	alpha-Linolenic acid metabolism	35/3553	98/14423	0.00916643	0.0432132	0.0333575	Glyma.06G285400/Glyma.17G050000/Glyma.10G124700/Glyma.14G156400/Glyma.08G102900/Glyma.20G077000/Glyma.07G039900/Glyma.13G070900/Glyma.04G240800/Glyma.14G223200/Glyma.01G235600/Glyma.17G246500/Glyma.16G008700/Glyma.13G047300/Glyma.19G132900/Glyma.13G109700/Glyma.05G180100/Glyma.17G209900/Glyma.19G044900/Glyma.12G191400/Glyma.02G190000/Glyma.11G035200/Glyma.19G057500/Glyma.03G130900/Glyma.14G223600…	35
12 h	09159	Environmental adaptation	198/3553	467/14423	9.0317e-18	1.49926e-15	1.10282e-15	Glyma.06G103200/Glyma.13G135900/Glyma.09G056100/Glyma.05G067300/Glyma.02G138800/Glyma.10G295700/Glyma.10G048100/Glyma.19G121900/Glyma.07G051600/Glyma.09G224600/Glyma.18G166800/Glyma.19G068300/Glyma.11G050000/Glyma.16G218200/Glyma.06G320700/Glyma.01G192100/Glyma.04G188700/Glyma.13G141000/Glyma.11G113500/Glyma.10G009100/Glyma.01G166100/Glyma.08G360600/Glyma.15G048600/Glyma.03G260300/Glyma.15G051600…	198
12 h	04626	Plant-pathogen interaction	157/3553	368/14423	1.28716e-14	1.06835e-12	7.85848e-13	Glyma.02G138800/Glyma.10G295700/Glyma.19G121900/Glyma.07G051600/Glyma.09G224600/Glyma.18G166800/Glyma.19G068300/Glyma.16G218200/Glyma.06G320700/Glyma.04G188700/Glyma.13G141000/Glyma.11G113500/Glyma.10G009100/Glyma.01G166100/Glyma.08G360600/Glyma.15G048600/Glyma.03G260300/Glyma.15G051600/Glyma.05G011100/Glyma.18G101100/Glyma.19G140800/Glyma.08G180800/Glyma.08G078200/Glyma.05G245600/Glyma.09G254800…	157
12 h	09191	Unclassified: metabolism	161/3553	415/14423	6.66826e-11	3.68977e-09	2.7141e-09	Glyma.10G022700/Glyma.16G073600/Glyma.13G099600/Glyma.04G095500/Glyma.08G149400/Glyma.19G136400/Glyma.15G061100/Glyma.02G290800/Glyma.19G061900/Glyma.05G042700/Glyma.09G015400/Glyma.08G319900/Glyma.07G066700/Glyma.09G008500/Glyma.06G208900/Glyma.06G175900/Glyma.08G299900/Glyma.05G138700/Glyma.18G092500/Glyma.17G125500/Glyma.03G242000/Glyma.04G093600/Glyma.04G045400/Glyma.19G175900/Glyma.08G268900…	161
12 h	99980	Enzymes with EC numbers	156/3553	402/14423	1.29216e-10	5.36247e-09	3.94449e-09	Glyma.10G022700/Glyma.16G073600/Glyma.13G099600/Glyma.04G095500/Glyma.08G149400/Glyma.19G136400/Glyma.15G061100/Glyma.02G290800/Glyma.19G061900/Glyma.05G042700/Glyma.09G015400/Glyma.09G008500/Glyma.06G208900/Glyma.06G175900/Glyma.08G299900/Glyma.05G138700/Glyma.17G125500/Glyma.03G242000/Glyma.04G093600/Glyma.04G045400/Glyma.19G175900/Glyma.08G268900/Glyma.07G222400/Glyma.17G123800/Glyma.14G182100…	156
12 h	04016	MAPK signaling pathway - plant	93/3553	208/14423	1.64391e-10	5.45777e-09	4.01459e-09	Glyma.10G058300/Glyma.03G191000/Glyma.18G035000/Glyma.02G138800/Glyma.16G025900/Glyma.19G121900/Glyma.13G041800/Glyma.19G068300/Glyma.05G216700/Glyma.03G181400/Glyma.13G229300/Glyma.02G250200/Glyma.13G151100/Glyma.14G108400/Glyma.14G145920/Glyma.15G048600/Glyma.15G051600/Glyma.16G009300/Glyma.08G180800/Glyma.08G078200/Glyma.13G076700/Glyma.02G165800/Glyma.09G254800/Glyma.08G188300/Glyma.07G003200…	93
12 h	00630	Glyoxylate and dicarboxylate metabolism	60/3553	118/14423	6.74742e-10	1.86679e-08	1.37316e-08	Glyma.13G349100/Glyma.13G308700/Glyma.13G361400/Glyma.11G043900/Glyma.13G097100/Glyma.15G016100/Glyma.05G060500/Glyma.12G193800/Glyma.14G184500/Glyma.17G228800/Glyma.01G199700/Glyma.09G015500/Glyma.14G223500/Glyma.08G157700/Glyma.05G141400/Glyma.02G244000/Glyma.18G041100/Glyma.14G026400/Glyma.03G128300/Glyma.15G012500/Glyma.11G042200/Glyma.09G173200/Glyma.01G026700/Glyma.12G098900/Glyma.08G097300…	60
12 h	01001	Protein kinases	169/3553	454/14423	9.44535e-10	2.2399e-08	1.64761e-08	Glyma.11G087200/Glyma.16G088700/Glyma.07G125200/Glyma.03G191000/Glyma.10G005600/Glyma.02G138800/Glyma.14G083100/Glyma.03G069800/Glyma.17G053500/Glyma.15G269800/Glyma.03G085700/Glyma.10G295700/Glyma.20G179100/Glyma.14G094400/Glyma.02G180100/Glyma.18G240600/Glyma.09G178500/Glyma.07G051600/Glyma.04G063600/Glyma.01G149000/Glyma.19G007300/Glyma.02G310400/Glyma.11G050000/Glyma.15G102500/Glyma.10G009900…	169
12 h	00280	Valine, leucine and isoleucine degradation	44/3553	91/14423	7.72456e-07	1.60285e-05	1.17901e-05	Glyma.12G071100/Glyma.10G124700/Glyma.15G058900/Glyma.07G213500/Glyma.20G077000/Glyma.01G103100/Glyma.07G019100/Glyma.02G145300/Glyma.08G276400/Glyma.16G200200/Glyma.09G042000/Glyma.09G148500/Glyma.05G063900/Glyma.10G028700/Glyma.08G204300/Glyma.08G307800/Glyma.03G117300/Glyma.02G131500/Glyma.15G150900/Glyma.01G129400/Glyma.17G132300/Glyma.11G154423/Glyma.07G235400/Glyma.16G080900/Glyma.03G070200…	44
12 h	00710	Carbon fixation in photosynthetic organisms	52/3553	116/14423	1.53974e-06	2.83997e-05	2.08901e-05	Glyma.16G013900/Glyma.19G186000/Glyma.10G197700/Glyma.07G045900/Glyma.11G043900/Glyma.13G097100/Glyma.16G044900/Glyma.05G025300/Glyma.08G067500/Glyma.13G270400/Glyma.15G019300/Glyma.07G074700/Glyma.16G168000/Glyma.18G030400/Glyma.20G122500/Glyma.19G106800/Glyma.12G161300/Glyma.16G077800/Glyma.20G192200/Glyma.10G205500/Glyma.01G026700/Glyma.09G210900/Glyma.01G010200/Glyma.20G166400/Glyma.13G046200…	52
12 h	00591	Linoleic acid metabolism	26/3553	45/14423	2.12003e-06	3.51924e-05	2.58866e-05	Glyma.08G102900/Glyma.19G132900/Glyma.20G053700/Glyma.03G237300/Glyma.07G039900/Glyma.16G008700/Glyma.03G130900/Glyma.13G239000/Glyma.02G190000/Glyma.07G034900/Glyma.07G034800/Glyma.U039300/Glyma.19G263300/Glyma.11G130200/Glyma.12G054700/Glyma.20G144600/Glyma.07G007000/Glyma.10G249100/Glyma.15G026400/Glyma.07G196800/Glyma.15G026500/Glyma.03G264300/Glyma.13G347700/Glyma.11G130300/Glyma.13G030300/G…	26
12 h	00410	beta-Alanine metabolism	42/3553	89/14423	3.04322e-06	4.59249e-05	3.37812e-05	Glyma.09G168900/Glyma.14G032300/Glyma.15G111500/Glyma.15G058900/Glyma.08G282800/Glyma.07G151500/Glyma.08G276400/Glyma.12G120300/Glyma.15G055500/Glyma.09G007100/Glyma.08G307800/Glyma.03G117300/Glyma.16G080900/Glyma.11G035200/Glyma.16G218500/Glyma.09G227500/Glyma.06G183900/Glyma.02G051500/Glyma.18G109900/Glyma.05G180100/Glyma.08G303800/Glyma.14G152100/Glyma.14G211100/Glyma.18G043600/Glyma.02G038500…	42
12 h	00194	Photosynthesis proteins	56/3553	142/14423	6.39772e-05	0.000885018	0.000650996	Glyma.06G277600/Glyma.16G205200/Glyma.15G016300/Glyma.12G232000/Glyma.06G194900/Glyma.10G042100/Glyma.14G003400/Glyma.04G095000/Glyma.13G129400/Glyma.07G019700/Glyma.03G114600/Glyma.02G064700/Glyma.04G167900/Glyma.06G150300/Glyma.06G020400/Glyma.08G173700/Glyma.08G317100/Glyma.10G040600/Glyma.10G042000/Glyma.18G028400/Glyma.08G304200/Glyma.15G107900/Glyma.11G228800/Glyma.17G262400/Glyma.02G047600…	56
12 h	00195	Photosynthesis	44/3553	108/14423	0.000157481	0.00201092	0.00147918	Glyma.15G016300/Glyma.12G232000/Glyma.10G042100/Glyma.04G095000/Glyma.13G129400/Glyma.07G019700/Glyma.03G114600/Glyma.06G150300/Glyma.06G020400/Glyma.08G173700/Glyma.08G317100/Glyma.10G040600/Glyma.10G042000/Glyma.08G304200/Glyma.15G107900/Glyma.02G047600/Glyma.16G127300/Glyma.02G061100/Glyma.04G066000/Glyma.18G286500/Glyma.13G302900/Glyma.11G168010/Glyma.17G130100/Glyma.20G098500/Glyma.08G126800…	44
12 h	04712	Circadian rhythm - plant	41/3553	99/14423	0.000170461	0.00202118	0.00148673	Glyma.06G103200/Glyma.13G135900/Glyma.09G056100/Glyma.05G067300/Glyma.10G048100/Glyma.11G050000/Glyma.01G192100/Glyma.04G166300/Glyma.06G196200/Glyma.16G163200/Glyma.11G018700/Glyma.10G221500/Glyma.20G170000/Glyma.04G050200/Glyma.07G058200/Glyma.16G018000/Glyma.20G209900/Glyma.05G067100/Glyma.05G025000/Glyma.16G017400/Glyma.17G102200/Glyma.19G260900/Glyma.03G261800/Glyma.07G048500/Glyma.19G222000…	41
12 h	09108	Metabolism of cofactors and vitamins	145/3553	453/14423	0.0001905	0.00204233	0.00150229	Glyma.14G032300/Glyma.20G179400/Glyma.01G232400/Glyma.03G010700/Glyma.13G234000/Glyma.12G020100/Glyma.01G238400/Glyma.14G150600/Glyma.05G001000/Glyma.04G210000/Glyma.01G226700/Glyma.02G301700/Glyma.07G188200/Glyma.04G089800/Glyma.14G205200/Glyma.03G212300/Glyma.05G060500/Glyma.04G093600/Glyma.19G148100/Glyma.07G184700/Glyma.13G268000/Glyma.08G330200/Glyma.15G055500/Glyma.20G043800/Glyma.08G188200…	145
12 h	00903	Limonene and pinene degradation	12/3553	18/14423	0.000196851	0.00204233	0.00150229	Glyma.06G183900/Glyma.02G051500/Glyma.14G152100/Glyma.13G170600/Glyma.01G031500/Glyma.02G034000/Glyma.16G131700/Glyma.13G340000/Glyma.04G248500/Glyma.12G057400/Glyma.06G114300/Glyma.15G034400	12
12 h	04136	Autophagy - other	29/3553	64/14423	0.000242275	0.00236574	0.00174018	Glyma.07G125200/Glyma.17G070200/Glyma.06G096300/Glyma.03G069800/Glyma.01G038800/Glyma.02G008800/Glyma.19G163500/Glyma.05G058300/Glyma.03G162100/Glyma.09G231000/Glyma.15G108200/Glyma.12G005700/Glyma.09G244800/Glyma.01G099600/Glyma.03G097000/Glyma.07G211600/Glyma.16G007300/Glyma.02G207500/Glyma.16G017300/Glyma.07G261000/Glyma.02G220700/Glyma.11G031800/Glyma.17G013000/Glyma.07G124300/Glyma.01G210200…	29
12 h	04146	Peroxisome	54/3553	142/14423	0.000258215	0.00238131	0.00175163	Glyma.15G034000/Glyma.17G009400/Glyma.07G080200/Glyma.10G124700/Glyma.15G111500/Glyma.13G346400/Glyma.03G119400/Glyma.05G005300/Glyma.20G077000/Glyma.07G151500/Glyma.15G266700/Glyma.12G120300/Glyma.20G004600/Glyma.03G018700/Glyma.05G037400/Glyma.08G203400/Glyma.14G211000/Glyma.09G007100/Glyma.15G083100/Glyma.17G089700/Glyma.11G125400/Glyma.10G249700/Glyma.13G317600/Glyma.13G340300/Glyma.11G254100…	54
12 h	00561	Glycerolipid metabolism	46/3553	117/14423	0.000300513	0.00262553	0.00193127	Glyma.17G077100/Glyma.13G361400/Glyma.13G134500/Glyma.03G174900/Glyma.10G046400/Glyma.19G175600/Glyma.06G220300/Glyma.17G248200/Glyma.09G263300/Glyma.03G008300/Glyma.19G132900/Glyma.01G113000/Glyma.09G160400/Glyma.05G196100/Glyma.13G093100/Glyma.14G077500/Glyma.15G012500/Glyma.18G197600/Glyma.13G101400/Glyma.07G069700/Glyma.06G299200/Glyma.12G200100/Glyma.06G183900/Glyma.02G051500/Glyma.09G207900…	46
12 h	00053	Ascorbate and aldarate metabolism	32/3553	74/14423	0.00033931	0.00281627	0.00207158	Glyma.12G073100/Glyma.18G092900/Glyma.11G150243/Glyma.19G028500/Glyma.17G077000/Glyma.04G009800/Glyma.05G022600/Glyma.20G224400/Glyma.19G061200/Glyma.06G068200/Glyma.02G292800/Glyma.10G162000/Glyma.06G183900/Glyma.02G051500/Glyma.18G265100/Glyma.06G114400/Glyma.12G032300/Glyma.16G073100/Glyma.14G152100/Glyma.11G107200/Glyma.13G170600/Glyma.01G031500/Glyma.02G034000/Glyma.05G002500/Glyma.16G131700…	32
12 h	99997	Function unknown	24/3553	51/14423	0.000409304	0.00323545	0.00237992	Glyma.13G310500/Glyma.11G082000/Glyma.13G113900/Glyma.01G161700/Glyma.13G111600/Glyma.05G213000/Glyma.03G066000/Glyma.17G054200/Glyma.13G107800/Glyma.17G051500/Glyma.12G191200/Glyma.08G019500/Glyma.17G002900/Glyma.07G271000/Glyma.11G131700/Glyma.17G045900/Glyma.20G213200/Glyma.20G247000/Glyma.20G164100/Glyma.10G177000/Glyma.10G229000/Glyma.11G110000/Glyma.12G036900/Glyma.07G273000	24
12 h	00650	Butanoate metabolism	18/3553	36/14423	0.000873814	0.00659333	0.00484988	Glyma.09G168900/Glyma.13G349100/Glyma.16G200200/Glyma.11G096200/Glyma.09G148500/Glyma.17G132300/Glyma.07G235400/Glyma.06G254700/Glyma.16G218500/Glyma.16G028700/Glyma.14G036600/Glyma.20G043000/Glyma.07G059800/Glyma.14G211100/Glyma.18G043600/Glyma.02G277900/Glyma.08G091400/Glyma.11G213000	18
12 h	00910	Nitrogen metabolism	26/3553	60/14423	0.00114054	0.0082317	0.00605502	Glyma.07G012500/Glyma.02G132100/Glyma.10G005200/Glyma.13G257200/Glyma.01G030500/Glyma.02G244000/Glyma.18G041100/Glyma.03G128300/Glyma.09G173200/Glyma.08G284000/Glyma.16G041200/Glyma.19G130800/Glyma.17G161900/Glyma.15G057700/Glyma.11G215500/Glyma.02G072200/Glyma.03G133600/Glyma.18G141900/Glyma.02G213700/Glyma.13G210800/Glyma.15G102000/Glyma.18G138400/Glyma.13G084000/Glyma.06G109200/Glyma.19G007700…	26
12 h	00592	alpha-Linolenic acid metabolism	38/3553	98/14423	0.00130964	0.00905835	0.00666309	Glyma.11G122700/Glyma.10G124700/Glyma.20G077000/Glyma.07G151500/Glyma.12G120300/Glyma.17G050000/Glyma.08G102900/Glyma.19G132900/Glyma.20G053700/Glyma.07G039900/Glyma.01G235600/Glyma.14G223200/Glyma.17G246500/Glyma.16G008700/Glyma.11G035200/Glyma.19G044900/Glyma.05G180100/Glyma.13G047300/Glyma.12G191400/Glyma.03G130900/Glyma.13G239000/Glyma.17G209900/Glyma.13G109700/Glyma.02G190000/Glyma.13G070900…	38
12 h	00062	Fatty acid elongation	21/3553	46/14423	0.00150344	0.00998281	0.0073431	Glyma.18G011600/Glyma.18G232000/Glyma.11G245600/Glyma.09G260200/Glyma.03G260300/Glyma.05G011100/Glyma.01G207200/Glyma.18G146900/Glyma.18G011500/Glyma.20G115500/Glyma.06G058500/Glyma.11G144809/Glyma.04G057800/Glyma.15G042500/Glyma.08G261100/Glyma.10G291700/Glyma.10G274400/Glyma.10G179400/Glyma.20G210900/Glyma.10G001800/Glyma.02G001500	21
12 h	01009	Protein phosphatases and associated proteins	141/3553	460/14423	0.00170357	0.0108766	0.00800056	Glyma.13G145700/Glyma.19G077700/Glyma.17G120300/Glyma.08G108800/Glyma.10G058900/Glyma.06G060800/Glyma.19G185700/Glyma.20G003400/Glyma.01G038800/Glyma.19G121900/Glyma.14G049600/Glyma.13G348300/Glyma.11G140500/Glyma.19G068300/Glyma.08G195200/Glyma.11G023700/Glyma.09G195800/Glyma.16G114700/Glyma.02G295600/Glyma.01G219800/Glyma.14G017800/Glyma.18G241800/Glyma.15G072000/Glyma.04G087200/Glyma.13G134500…	141
12 h	09194	Poorly characterized	26/3553	63/14423	0.00264855	0.0162837	0.0119779	Glyma.13G310500/Glyma.11G082000/Glyma.13G113900/Glyma.01G161700/Glyma.13G111600/Glyma.05G213000/Glyma.03G066000/Glyma.17G054200/Glyma.13G107800/Glyma.17G051500/Glyma.12G191200/Glyma.08G019500/Glyma.17G002900/Glyma.17G069700/Glyma.07G271000/Glyma.11G131700/Glyma.01G093200/Glyma.17G045900/Glyma.20G213200/Glyma.20G247000/Glyma.20G164100/Glyma.10G177000/Glyma.10G229000/Glyma.11G110000/Glyma.12G036900…	26
12 h	00906	Carotenoid biosynthesis	22/3553	51/14423	0.00285599	0.016932	0.0124547	Glyma.02G240200/Glyma.10G160500/Glyma.13G147500/Glyma.19G251000/Glyma.20G227900/Glyma.15G172200/Glyma.10G086700/Glyma.11G151700/Glyma.09G252800/Glyma.17G174500/Glyma.10G231200/Glyma.18G111900/Glyma.01G154900/Glyma.18G239900/Glyma.14G209700/Glyma.14G045100/Glyma.09G066200/Glyma.08G306200/Glyma.11G161947/Glyma.09G000600/Glyma.02G104300/Glyma.08G176300	22
12 h	04040	Ion channels	34/3553	89/14423	0.00304795	0.0174469	0.0128335	Glyma.12G194100/Glyma.16G218200/Glyma.13G308500/Glyma.13G141000/Glyma.16G111700/Glyma.13G161800/Glyma.05G077100/Glyma.14G161600/Glyma.09G168700/Glyma.18G263900/Glyma.12G099500/Glyma.17G006800/Glyma.07G056400/Glyma.12G204400/Glyma.19G221000/Glyma.02G299700/Glyma.06G126600/Glyma.03G257000/Glyma.14G014100/Glyma.11G087100/Glyma.09G197400/Glyma.13G296900/Glyma.06G190400/Glyma.01G157900/Glyma.10G053900…	34
12 h	09106	Metabolism of other amino acids	113/3553	365/14423	0.00325757	0.0180252	0.0132589	Glyma.09G168900/Glyma.12G073100/Glyma.14G032300/Glyma.02G309900/Glyma.15G111500/Glyma.15G058900/Glyma.17G223900/Glyma.08G282800/Glyma.05G005300/Glyma.07G151500/Glyma.08G276400/Glyma.15G266700/Glyma.12G120300/Glyma.11G088200/Glyma.08G174700/Glyma.01G156600/Glyma.11G176400/Glyma.15G055500/Glyma.14G211000/Glyma.09G007100/Glyma.20G151500/Glyma.08G307800/Glyma.14G184500/Glyma.18G261600/Glyma.03G117300…	113
12 h	00430	Taurine and hypotaurine metabolism	8/3553	13/14423	0.00510549	0.0273391	0.0201099	Glyma.09G168900/Glyma.18G021100/Glyma.16G218500/Glyma.14G211100/Glyma.18G043600/Glyma.07G126200/Glyma.08G091400/Glyma.11G213000	8
12 h	04070	Phosphatidylinositol signaling system	41/3553	115/14423	0.00527596	0.0273691	0.020132	Glyma.06G096300/Glyma.20G013500/Glyma.15G046400/Glyma.19G121900/Glyma.19G068300/Glyma.20G207000/Glyma.10G255000/Glyma.17G077100/Glyma.13G065500/Glyma.10G060000/Glyma.18G255000/Glyma.04G088000/Glyma.14G059200/Glyma.07G045600/Glyma.04G030000/Glyma.08G186400/Glyma.18G027200/Glyma.10G183200/Glyma.09G241100/Glyma.05G196100/Glyma.06G218300/Glyma.13G093100/Glyma.04G009800/Glyma.20G173200/Glyma.11G230000…	41
12 h	00920	Sulfur metabolism	23/3553	58/14423	0.00807206	0.0394386	0.02901	Glyma.02G299100/Glyma.15G066900/Glyma.18G002800/Glyma.16G027700/Glyma.20G151500/Glyma.03G244800/Glyma.08G327400/Glyma.18G261600/Glyma.02G138400/Glyma.16G040900/Glyma.18G234600/Glyma.09G258000/Glyma.11G254300/Glyma.20G228900/Glyma.13G244900/Glyma.10G159800/Glyma.05G105300/Glyma.16G118800/Glyma.18G080000/Glyma.11G084100/Glyma.01G160000/Glyma.15G068800/Glyma.14G014700	23
12 h	09109	Metabolism of terpenoids and polyketides	95/3553	309/14423	0.00807779	0.0394386	0.02901	Glyma.11G009100/Glyma.02G059000/Glyma.10G062200/Glyma.11G021400/Glyma.16G099800/Glyma.16G200200/Glyma.02G240200/Glyma.09G148500/Glyma.12G173200/Glyma.06G038700/Glyma.10G160500/Glyma.02G273100/Glyma.04G237000/Glyma.13G326400/Glyma.18G118100/Glyma.07G252600/Glyma.13G147500/Glyma.15G093900/Glyma.07G073800/Glyma.19G251000/Glyma.20G227900/Glyma.11G228900/Glyma.17G132300/Glyma.15G172200/Glyma.10G086700…	95
12 h	00565	Ether lipid metabolism	19/3553	46/14423	0.00937417	0.0444604	0.0327039	Glyma.02G093500/Glyma.11G178400/Glyma.15G152100/Glyma.09G041400/Glyma.04G033600/Glyma.06G033800/Glyma.19G132900/Glyma.06G061500/Glyma.05G168300/Glyma.20G238000/Glyma.01G215100/Glyma.18G288600/Glyma.03G130900/Glyma.02G190000/Glyma.16G081200/Glyma.06G020500/Glyma.13G364900/Glyma.18G265800/Glyma.03G092800	19
16 h	09159	Environmental adaptation	188/3419	467/14423	5.18471e-16	8.60661e-14	5.78504e-14	Glyma.09G128800/Glyma.14G006800/Glyma.04G157200/Glyma.01G068000/Glyma.02G124500/Glyma.16G218200/Glyma.12G039400/Glyma.05G198300/Glyma.03G138000/Glyma.08G180800/Glyma.10G009100/Glyma.01G166100/Glyma.05G011100/Glyma.20G170000/Glyma.02G138800/Glyma.06G103200/Glyma.15G051600/Glyma.04G204400/Glyma.06G196200/Glyma.03G084000/Glyma.14G216300/Glyma.13G141000/Glyma.08G078200/Glyma.08G323200/Glyma.05G123200…	188
16 h	04626	Plant-pathogen interaction	151/3419	368/14423	6.70151e-14	5.56225e-12	3.73874e-12	Glyma.09G128800/Glyma.14G006800/Glyma.04G157200/Glyma.01G068000/Glyma.02G124500/Glyma.16G218200/Glyma.12G039400/Glyma.05G198300/Glyma.03G138000/Glyma.08G180800/Glyma.10G009100/Glyma.01G166100/Glyma.05G011100/Glyma.02G138800/Glyma.15G051600/Glyma.04G204400/Glyma.03G084000/Glyma.14G216300/Glyma.13G141000/Glyma.08G078200/Glyma.08G323200/Glyma.05G123200/Glyma.02G008500/Glyma.18G101100/Glyma.14G165700…	151
16 h	00630	Glyoxylate and dicarboxylate metabolism	59/3419	118/14423	4.41829e-10	2.44479e-08	1.64329e-08	Glyma.08G108900/Glyma.02G217100/Glyma.13G349100/Glyma.13G361400/Glyma.19G107300/Glyma.05G141400/Glyma.17G037900/Glyma.09G015500/Glyma.15G016100/Glyma.14G184500/Glyma.17G228800/Glyma.14G223500/Glyma.01G026700/Glyma.07G081900/Glyma.09G173200/Glyma.13G308700/Glyma.14G026400/Glyma.13G097100/Glyma.12G193800/Glyma.01G199700/Glyma.11G042200/Glyma.12G098900/Glyma.03G128300/Glyma.08G157700/Glyma.19G130800…	59
16 h	00710	Carbon fixation in photosynthetic organisms	55/3419	116/14423	1.91842e-08	7.96146e-07	5.35139e-07	Glyma.18G193600/Glyma.16G168000/Glyma.19G186000/Glyma.10G197700/Glyma.15G136200/Glyma.03G102900/Glyma.05G025300/Glyma.10G268500/Glyma.08G067500/Glyma.16G013900/Glyma.07G045900/Glyma.10G059500/Glyma.16G044900/Glyma.01G026700/Glyma.20G122500/Glyma.13G097100/Glyma.20G192200/Glyma.06G087800/Glyma.13G270400/Glyma.18G030400/Glyma.07G074700/Glyma.19G106800/Glyma.09G210900/Glyma.12G161300/Glyma.01G010200…	55
16 h	99980	Enzymes with EC numbers	141/3419	402/14423	1.25461e-07	4.16532e-06	2.79977e-06	Glyma.18G097000/Glyma.09G015400/Glyma.08G268900/Glyma.05G042700/Glyma.14G182100/Glyma.17G125500/Glyma.15G056800/Glyma.02G049400/Glyma.03G242000/Glyma.17G065200/Glyma.16G073600/Glyma.07G174800/Glyma.10G022700/Glyma.06G208900/Glyma.20G031600/Glyma.12G049500/Glyma.06G175900/Glyma.19G239400/Glyma.09G008500/Glyma.19G136400/Glyma.07G228300/Glyma.04G093600/Glyma.13G096500/Glyma.15G112900/Glyma.08G089700…	141
16 h	09191	Unclassified: metabolism	144/3419	415/14423	1.93733e-07	5.07316e-06	3.40998e-06	Glyma.18G097000/Glyma.09G015400/Glyma.08G268900/Glyma.05G042700/Glyma.14G182100/Glyma.17G125500/Glyma.17G052700/Glyma.15G056800/Glyma.02G049400/Glyma.03G242000/Glyma.17G065200/Glyma.16G073600/Glyma.07G174800/Glyma.10G022700/Glyma.06G208900/Glyma.20G031600/Glyma.12G049500/Glyma.18G092500/Glyma.06G175900/Glyma.19G239400/Glyma.09G008500/Glyma.19G136400/Glyma.07G228300/Glyma.04G093600/Glyma.13G096500…	144
16 h	00195	Photosynthesis	50/3419	108/14423	2.13928e-07	5.07316e-06	3.40998e-06	Glyma.06G321900/Glyma.13G129400/Glyma.12G202500/Glyma.10G042100/Glyma.04G020300/Glyma.06G150300/Glyma.11G077600/Glyma.10G249000/Glyma.12G199400/Glyma.07G019700/Glyma.06G020400/Glyma.07G112000/Glyma.08G173700/Glyma.10G042000/Glyma.04G095000/Glyma.08G304200/Glyma.03G114600/Glyma.09G087700/Glyma.20G098500/Glyma.01G238000/Glyma.04G066000/Glyma.08G317100/Glyma.08G204800/Glyma.08G126800/Glyma.09G250800…	50
16 h	04016	MAPK signaling pathway - plant	82/3419	208/14423	2.76557e-07	5.41516e-06	3.63987e-06	Glyma.08G005100/Glyma.16G025900/Glyma.14G108400/Glyma.08G180800/Glyma.16G009300/Glyma.02G138800/Glyma.02G165800/Glyma.13G076700/Glyma.13G041800/Glyma.03G216700/Glyma.15G051600/Glyma.08G078200/Glyma.14G145920/Glyma.02G135500/Glyma.05G123200/Glyma.13G145100/Glyma.07G056900/Glyma.09G002600/Glyma.14G165700/Glyma.17G178800/Glyma.20G221800/Glyma.03G236300/Glyma.04G203200/Glyma.05G198700/Glyma.14G223500…	82
16 h	00194	Photosynthesis proteins	61/3419	142/14423	2.93593e-07	5.41516e-06	3.63987e-06	Glyma.06G321900/Glyma.02G064700/Glyma.13G129400/Glyma.12G202500/Glyma.10G042100/Glyma.14G003400/Glyma.04G020300/Glyma.06G194900/Glyma.06G150300/Glyma.11G077600/Glyma.06G277600/Glyma.10G249000/Glyma.12G199400/Glyma.07G019700/Glyma.04G167900/Glyma.06G020400/Glyma.07G112000/Glyma.08G173700/Glyma.10G042000/Glyma.04G095000/Glyma.08G304200/Glyma.03G114600/Glyma.18G028400/Glyma.09G087700/Glyma.20G098500…	61
16 h	01001	Protein kinases	154/3419	454/14423	3.65443e-07	6.06635e-06	4.07757e-06	Glyma.01G157800/Glyma.02G180100/Glyma.13G002100/Glyma.18G212800/Glyma.15G269800/Glyma.13G105900/Glyma.06G238000/Glyma.10G094500/Glyma.03G011000/Glyma.12G093800/Glyma.09G212900/Glyma.04G063600/Glyma.17G128200/Glyma.07G066800/Glyma.03G069800/Glyma.08G002900/Glyma.13G313500/Glyma.10G275400/Glyma.08G005100/Glyma.15G102500/Glyma.05G198300/Glyma.03G138000/Glyma.20G228000/Glyma.10G005600/Glyma.16G158700…	154
16 h	00280	Valine, leucine and isoleucine degradation	43/3419	91/14423	7.43469e-07	1.06162e-05	7.13584e-06	Glyma.20G009100/Glyma.12G071100/Glyma.08G276400/Glyma.13G030400/Glyma.09G042000/Glyma.03G117300/Glyma.01G196300/Glyma.20G077000/Glyma.08G307800/Glyma.07G019100/Glyma.15G150900/Glyma.08G204300/Glyma.01G129400/Glyma.17G037900/Glyma.10G028700/Glyma.07G213500/Glyma.05G063900/Glyma.10G124700/Glyma.01G103100/Glyma.11G154423/Glyma.16G080900/Glyma.16G200200/Glyma.17G091000/Glyma.02G051500/Glyma.02G131500…	43
16 h	00053	Ascorbate and aldarate metabolism	37/3419	74/14423	7.67439e-07	1.06162e-05	7.13584e-06	Glyma.13G030400/Glyma.18G092900/Glyma.U031121/Glyma.11G150243/Glyma.17G091000/Glyma.02G051500/Glyma.02G292800/Glyma.19G061200/Glyma.17G077000/Glyma.04G009800/Glyma.18G265100/Glyma.13G057700/Glyma.20G224400/Glyma.06G068200/Glyma.07G013900/Glyma.10G162000/Glyma.12G032300/Glyma.05G022600/Glyma.19G028500/Glyma.14G152100/Glyma.06G114400/Glyma.16G073100/Glyma.13G076900/Glyma.06G183900/Glyma.11G107200/G…	37
16 h	00903	Limonene and pinene degradation	14/3419	18/14423	1.96218e-06	2.50555e-05	1.68414e-05	Glyma.13G030400/Glyma.17G091000/Glyma.02G051500/Glyma.14G152100/Glyma.06G183900/Glyma.01G031500/Glyma.13G170600/Glyma.02G034000/Glyma.06G114300/Glyma.13G340000/Glyma.16G131700/Glyma.04G248500/Glyma.12G057400/Glyma.15G034400	14
16 h	09109	Metabolism of terpenoids and polyketides	109/3419	309/14423	2.43712e-06	2.88972e-05	1.94236e-05	Glyma.06G049500/Glyma.14G059900/Glyma.04G237000/Glyma.02G273100/Glyma.11G252500/Glyma.13G030400/Glyma.06G038700/Glyma.02G240200/Glyma.02G272200/Glyma.19G251000/Glyma.11G112000/Glyma.19G131400/Glyma.16G141700/Glyma.02G059000/Glyma.13G147500/Glyma.11G253000/Glyma.10G160500/Glyma.12G173200/Glyma.20G058000/Glyma.15G093900/Glyma.13G262200/Glyma.18G229700/Glyma.10G231200/Glyma.11G021400/Glyma.16G099800…	109
16 h	00561	Glycerolipid metabolism	50/3419	117/14423	4.01031e-06	4.33206e-05	2.91185e-05	Glyma.17G077100/Glyma.13G030400/Glyma.19G142500/Glyma.13G361400/Glyma.06G220300/Glyma.03G008300/Glyma.12G045700/Glyma.13G134500/Glyma.10G046400/Glyma.19G132900/Glyma.19G175600/Glyma.09G160400/Glyma.09G263300/Glyma.17G091000/Glyma.02G051500/Glyma.01G113000/Glyma.13G093100/Glyma.05G196100/Glyma.03G174900/Glyma.07G069700/Glyma.13G101400/Glyma.18G197600/Glyma.14G077500/Glyma.03G130900/Glyma.02G190000…	50
16 h	00591	Linoleic acid metabolism	25/3419	45/14423	4.17548e-06	4.33206e-05	2.91185e-05	Glyma.08G102900/Glyma.19G132900/Glyma.07G039900/Glyma.03G237300/Glyma.13G239000/Glyma.16G008700/Glyma.03G130900/Glyma.02G190000/Glyma.19G263300/Glyma.20G144600/Glyma.10G249100/Glyma.U039300/Glyma.07G034800/Glyma.03G264300/Glyma.11G130200/Glyma.07G034900/Glyma.12G054700/Glyma.07G007000/Glyma.15G026400/Glyma.15G026500/Glyma.07G196800/Glyma.13G030300/Glyma.07G006900/Glyma.13G347700/Glyma.11G130300	25
16 h	00906	Carotenoid biosynthesis	27/3419	51/14423	5.94508e-06	5.8052e-05	3.90204e-05	Glyma.11G252500/Glyma.02G240200/Glyma.02G272200/Glyma.19G251000/Glyma.19G131400/Glyma.13G147500/Glyma.11G253000/Glyma.10G160500/Glyma.10G231200/Glyma.03G128900/Glyma.15G172200/Glyma.20G227900/Glyma.09G252800/Glyma.10G086700/Glyma.17G174500/Glyma.18G111900/Glyma.01G154900/Glyma.11G151700/Glyma.08G306200/Glyma.14G209700/Glyma.18G239900/Glyma.09G066200/Glyma.14G045100/Glyma.11G161947/Glyma.09G000600…	27
16 h	00410	beta-Alanine metabolism	40/3419	89/14423	8.39352e-06	7.74069e-05	5.203e-05	Glyma.15G111500/Glyma.08G276400/Glyma.13G030400/Glyma.09G168900/Glyma.03G117300/Glyma.12G120300/Glyma.06G178400/Glyma.15G055500/Glyma.09G007100/Glyma.07G151500/Glyma.08G307800/Glyma.09G227500/Glyma.16G080900/Glyma.17G091000/Glyma.02G051500/Glyma.18G109900/Glyma.05G180100/Glyma.14G152100/Glyma.18G043600/Glyma.08G303800/Glyma.16G218500/Glyma.11G035200/Glyma.06G183900/Glyma.14G036000/Glyma.01G031500…	40
16 h	04040	Ion channels	38/3419	89/14423	5.68341e-05	0.000496551	0.000333763	Glyma.04G157200/Glyma.16G218200/Glyma.13G141000/Glyma.16G111700/Glyma.13G308400/Glyma.13G308500/Glyma.12G194100/Glyma.01G193700/Glyma.14G161600/Glyma.09G168700/Glyma.13G161800/Glyma.18G263900/Glyma.12G204400/Glyma.07G056400/Glyma.12G099500/Glyma.02G299700/Glyma.06G126600/Glyma.14G014100/Glyma.03G257000/Glyma.10G053900/Glyma.19G221000/Glyma.06G190400/Glyma.13G296900/Glyma.05G077100/Glyma.13G233400…	38
16 h	09108	Metabolism of cofactors and vitamins	143/3419	453/14423	6.46933e-05	0.000536955	0.000360921	Glyma.18G021500/Glyma.08G108900/Glyma.19G123800/Glyma.04G089800/Glyma.02G217100/Glyma.02G143700/Glyma.04G177000/Glyma.05G001000/Glyma.04G133100/Glyma.17G089200/Glyma.03G176800/Glyma.13G030400/Glyma.10G128400/Glyma.18G203400/Glyma.13G234000/Glyma.12G161500/Glyma.03G060100/Glyma.01G197100/Glyma.19G115900/Glyma.01G232400/Glyma.07G188200/Glyma.01G196300/Glyma.02G251400/Glyma.11G194500/Glyma.08G188200…	143
16 h	00592	alpha-Linolenic acid metabolism	40/3419	98/14423	0.000122603	0.00096915	0.000651426	Glyma.20G009100/Glyma.07G162900/Glyma.12G120300/Glyma.20G077000/Glyma.14G156400/Glyma.07G151500/Glyma.17G050000/Glyma.08G102900/Glyma.10G124700/Glyma.19G132900/Glyma.07G039900/Glyma.04G240800/Glyma.17G246500/Glyma.13G239000/Glyma.16G008700/Glyma.03G130900/Glyma.05G180100/Glyma.02G190000/Glyma.14G223200/Glyma.13G047300/Glyma.01G235600/Glyma.19G263300/Glyma.13G109700/Glyma.11G035200/Glyma.12G191400…	40
16 h	00071	Fatty acid degradation	36/3419	89/14423	0.000323104	0.00243797	0.00163871	Glyma.20G009100/Glyma.13G030400/Glyma.02G274000/Glyma.09G042000/Glyma.12G120300/Glyma.20G077000/Glyma.14G156400/Glyma.07G151500/Glyma.15G150900/Glyma.02G274100/Glyma.11G254100/Glyma.10G249700/Glyma.10G124700/Glyma.11G017900/Glyma.17G091000/Glyma.02G051500/Glyma.04G240800/Glyma.20G143900/Glyma.05G180100/Glyma.20G060300/Glyma.14G042000/Glyma.14G152100/Glyma.11G035200/Glyma.06G183900/Glyma.07G149400…	36
16 h	09106	Metabolism of other amino acids	115/3419	365/14423	0.00035093	0.0025328	0.00170245	Glyma.08G108900/Glyma.19G177200/Glyma.02G217100/Glyma.15G111500/Glyma.08G276400/Glyma.08G288100/Glyma.13G030400/Glyma.18G234600/Glyma.08G199000/Glyma.09G168900/Glyma.16G000200/Glyma.03G117300/Glyma.05G005300/Glyma.17G223900/Glyma.09G258000/Glyma.12G120300/Glyma.06G178400/Glyma.15G055500/Glyma.09G007100/Glyma.07G151500/Glyma.08G307800/Glyma.11G176400/Glyma.18G190300/Glyma.01G156600/Glyma.18G021100…	115
16 h	01003	Glycosyltransferases	102/3419	320/14423	0.000468818	0.00324266	0.00217959	Glyma.09G017000/Glyma.12G201500/Glyma.04G159200/Glyma.20G167900/Glyma.07G081600/Glyma.06G240600/Glyma.02G100600/Glyma.18G264700/Glyma.10G224000/Glyma.13G114000/Glyma.12G084600/Glyma.10G032400/Glyma.08G127200/Glyma.05G086900/Glyma.06G034800/Glyma.02G086200/Glyma.07G172000/Glyma.06G205900/Glyma.03G159200/Glyma.17G102400/Glyma.08G242500/Glyma.08G348000/Glyma.09G252900/Glyma.19G161500/Glyma.15G122600…	102
16 h	99997	Function unknown	23/3419	51/14423	0.000634083	0.00421031	0.00283001	Glyma.13G113900/Glyma.08G019500/Glyma.03G066000/Glyma.07G271000/Glyma.11G082000/Glyma.05G213000/Glyma.06G293500/Glyma.13G107800/Glyma.01G161700/Glyma.08G300800/Glyma.17G054200/Glyma.17G051500/Glyma.20G247000/Glyma.17G002900/Glyma.11G131700/Glyma.17G045900/Glyma.20G213200/Glyma.12G036900/Glyma.20G164100/Glyma.10G177000/Glyma.11G110000/Glyma.10G229000/Glyma.07G273000	23
16 h	04146	Peroxisome	51/3419	142/14423	0.000680523	0.00434488	0.00292046	Glyma.20G009100/Glyma.15G213100/Glyma.17G009400/Glyma.17G089700/Glyma.15G111500/Glyma.08G203400/Glyma.08G237400/Glyma.05G005300/Glyma.12G120300/Glyma.20G077000/Glyma.09G007100/Glyma.03G119400/Glyma.07G151500/Glyma.20G004600/Glyma.05G141400/Glyma.13G317600/Glyma.09G281200/Glyma.11G254100/Glyma.10G249700/Glyma.11G125400/Glyma.15G083100/Glyma.10G124700/Glyma.14G211000/Glyma.14G223500/Glyma.12G178800…	51
16 h	00920	Sulfur metabolism	25/3419	58/14423	0.000855682	0.00525391	0.00353148	Glyma.07G206800/Glyma.18G002800/Glyma.18G234600/Glyma.09G258000/Glyma.08G327400/Glyma.16G040900/Glyma.05G105300/Glyma.19G242300/Glyma.20G228900/Glyma.07G261500/Glyma.03G244800/Glyma.10G159800/Glyma.16G027700/Glyma.13G244900/Glyma.11G254300/Glyma.20G151500/Glyma.18G261600/Glyma.02G138400/Glyma.01G160000/Glyma.18G080000/Glyma.11G084100/Glyma.16G118800/Glyma.15G068800/Glyma.10G159700/Glyma.14G014700	25
16 h	00062	Fatty acid elongation	21/3419	46/14423	0.000886201	0.00525391	0.00353148	Glyma.05G011100/Glyma.09G260200/Glyma.11G245600/Glyma.18G232000/Glyma.03G260300/Glyma.08G279700/Glyma.01G207200/Glyma.18G011500/Glyma.20G115500/Glyma.18G146900/Glyma.06G058500/Glyma.04G057800/Glyma.08G261100/Glyma.15G042500/Glyma.11G144809/Glyma.10G179400/Glyma.20G210900/Glyma.10G291700/Glyma.10G274400/Glyma.10G001800/Glyma.02G001500	21
16 h	00260	Glycine, serine and threonine metabolism	43/3419	119/14423	0.00150033	0.0085881	0.0057726	Glyma.08G108900/Glyma.02G217100/Glyma.13G049500/Glyma.13G361400/Glyma.06G178400/Glyma.01G129400/Glyma.17G037900/Glyma.09G270500/Glyma.15G016100/Glyma.14G184500/Glyma.17G228800/Glyma.12G085900/Glyma.01G026700/Glyma.07G081900/Glyma.17G057700/Glyma.01G199700/Glyma.11G042200/Glyma.19G102100/Glyma.03G250800/Glyma.17G132100/Glyma.06G186300/Glyma.13G087800/Glyma.17G012000/Glyma.15G012500/Glyma.02G038100…	43
16 h	04712	Circadian rhythm - plant	37/3419	99/14423	0.00156042	0.00863433	0.00580367	Glyma.20G170000/Glyma.06G103200/Glyma.06G196200/Glyma.10G221500/Glyma.04G166300/Glyma.11G018700/Glyma.16G163200/Glyma.11G050000/Glyma.16G017400/Glyma.01G192100/Glyma.05G067100/Glyma.07G058200/Glyma.20G209900/Glyma.04G050200/Glyma.19G260900/Glyma.05G025000/Glyma.17G102200/Glyma.03G261800/Glyma.04G228300/Glyma.06G136600/Glyma.16G018000/Glyma.08G109400/Glyma.07G048500/Glyma.14G174200/Glyma.08G110500…	37
16 h	00908	Zeatin biosynthesis	21/3419	48/14423	0.00172886	0.00908778	0.00610846	Glyma.10G062200/Glyma.19G187500/Glyma.20G116500/Glyma.03G187500/Glyma.18G274400/Glyma.08G365000/Glyma.18G297200/Glyma.14G099000/Glyma.15G103800/Glyma.12G011400/Glyma.02G148600/Glyma.03G187700/Glyma.15G170300/Glyma.09G063900/Glyma.09G225400/Glyma.03G186900/Glyma.19G187100/Glyma.10G025300/Glyma.19G135100/Glyma.03G187000/Glyma.19G187000	21
16 h	00520	Amino sugar and nucleotide sugar metabolism	82/3419	258/14423	0.00175186	0.00908778	0.00610846	Glyma.09G017000/Glyma.11G141200/Glyma.08G086700/Glyma.09G030300/Glyma.12G064600/Glyma.12G201500/Glyma.04G159200/Glyma.07G081600/Glyma.11G075700/Glyma.18G264700/Glyma.18G229800/Glyma.01G139500/Glyma.10G045800/Glyma.10G032400/Glyma.15G029800/Glyma.17G257800/Glyma.06G205900/Glyma.03G159200/Glyma.03G027300/Glyma.08G242500/Glyma.08G348000/Glyma.19G161500/Glyma.15G122600/Glyma.12G180300/Glyma.19G038000…	82
16 h	00030	Pentose phosphate pathway	37/3419	100/14423	0.00192008	0.00965859	0.00649214	Glyma.18G193600/Glyma.16G168000/Glyma.07G122000/Glyma.08G199000/Glyma.15G136200/Glyma.05G025300/Glyma.10G268500/Glyma.08G067500/Glyma.10G194300/Glyma.07G013800/Glyma.17G218200/Glyma.03G100800/Glyma.20G122500/Glyma.02G202500/Glyma.20G153600/Glyma.20G125200/Glyma.20G166400/Glyma.07G126400/Glyma.18G134600/Glyma.07G142700/Glyma.18G277300/Glyma.10G293500/Glyma.08G289900/Glyma.17G101700/Glyma.13G353400…	37
16 h	00051	Fructose and mannose metabolism	43/3419	121/14423	0.00217515	0.0106199	0.00713827	Glyma.18G193600/Glyma.16G168000/Glyma.19G186000/Glyma.11G075700/Glyma.18G229800/Glyma.10G268500/Glyma.15G029800/Glyma.16G220300/Glyma.17G257800/Glyma.08G067500/Glyma.10G194300/Glyma.10G059500/Glyma.20G122500/Glyma.12G204700/Glyma.14G072600/Glyma.18G060600/Glyma.13G296600/Glyma.14G218800/Glyma.20G213300/Glyma.18G215600/Glyma.05G226600/Glyma.20G166400/Glyma.11G127200/Glyma.12G051800/Glyma.07G126400…	43
16 h	00130	Ubiquinone and other terpenoid-quinone biosynthesis	30/3419	78/14423	0.00250982	0.0119037	0.00800123	Glyma.02G143700/Glyma.12G161500/Glyma.01G232400/Glyma.07G188200/Glyma.11G194500/Glyma.14G205200/Glyma.01G177600/Glyma.15G001700/Glyma.12G216900/Glyma.13G284200/Glyma.11G010500/Glyma.02G236500/Glyma.17G064600/Glyma.15G130500/Glyma.13G095600/Glyma.15G064700/Glyma.18G139700/Glyma.09G024500/Glyma.02G002000/Glyma.12G045300/Glyma.08G061200/Glyma.08G285500/Glyma.09G222800/Glyma.13G372000/Glyma.12G014300…	30
16 h	00340	Histidine metabolism	17/3419	38/14423	0.00349058	0.0160954	0.0108187	Glyma.08G081500/Glyma.13G030400/Glyma.17G091000/Glyma.02G051500/Glyma.04G009800/Glyma.14G152100/Glyma.06G183900/Glyma.01G031500/Glyma.13G170600/Glyma.02G034000/Glyma.06G114300/Glyma.13G340000/Glyma.16G131700/Glyma.04G248500/Glyma.12G057400/Glyma.15G034400/Glyma.08G076400	17
16 h	00910	Nitrogen metabolism	24/3419	60/14423	0.00361101	0.0162008	0.0108895	Glyma.08G196200/Glyma.07G012500/Glyma.13G257200/Glyma.10G005200/Glyma.01G030500/Glyma.09G173200/Glyma.03G128300/Glyma.19G130800/Glyma.18G041100/Glyma.16G041200/Glyma.02G244000/Glyma.17G161900/Glyma.11G215500/Glyma.15G057700/Glyma.02G213700/Glyma.18G141900/Glyma.13G210800/Glyma.10G073400/Glyma.13G084000/Glyma.15G102000/Glyma.18G138400/Glyma.05G007100/Glyma.06G109200/Glyma.19G007700	24
16 h	00650	Butanoate metabolism	16/3419	36/14423	0.00492286	0.0215051	0.0144549	Glyma.13G349100/Glyma.09G168900/Glyma.11G096200/Glyma.16G200200/Glyma.17G132300/Glyma.07G235400/Glyma.06G254700/Glyma.16G028700/Glyma.20G043000/Glyma.18G043600/Glyma.16G218500/Glyma.07G059800/Glyma.02G277900/Glyma.14G036600/Glyma.14G211100/Glyma.11G213000	16
16 h	00562	Inositol phosphate metabolism	37/3419	107/14423	0.00705977	0.0300493	0.020198	Glyma.20G013500/Glyma.19G186000/Glyma.06G096300/Glyma.08G276400/Glyma.15G046400/Glyma.04G253100/Glyma.05G169400/Glyma.04G088000/Glyma.08G127700/Glyma.10G060000/Glyma.08G186400/Glyma.06G218300/Glyma.14G059200/Glyma.10G059500/Glyma.05G197200/Glyma.07G107000/Glyma.11G178400/Glyma.20G173200/Glyma.18G027200/Glyma.11G230000/Glyma.06G089800/Glyma.04G009800/Glyma.02G257200/Glyma.07G013900/Glyma.14G059400…	37
16 h	09194	Poorly characterized	24/3419	63/14423	0.00742211	0.0308018	0.0207038	Glyma.13G113900/Glyma.08G019500/Glyma.03G066000/Glyma.07G271000/Glyma.11G082000/Glyma.05G213000/Glyma.06G293500/Glyma.13G107800/Glyma.01G161700/Glyma.08G300800/Glyma.17G054200/Glyma.17G051500/Glyma.20G247000/Glyma.17G002900/Glyma.11G131700/Glyma.17G045900/Glyma.20G213200/Glyma.12G036900/Glyma.20G164100/Glyma.01G093200/Glyma.10G177000/Glyma.11G110000/Glyma.10G229000/Glyma.07G273000	24
16 h	00330	Arginine and proline metabolism	39/3419	115/14423	0.00830859	0.0336396	0.0226113	Glyma.20G248500/Glyma.08G288100/Glyma.13G030400/Glyma.17G083400/Glyma.17G163900/Glyma.05G104400/Glyma.05G141900/Glyma.17G021200/Glyma.09G227500/Glyma.08G106000/Glyma.17G092400/Glyma.08G255800/Glyma.02G128000/Glyma.18G137100/Glyma.10G297300/Glyma.17G091000/Glyma.02G051500/Glyma.03G129100/Glyma.06G007500/Glyma.18G188000/Glyma.14G152100/Glyma.05G029100/Glyma.08G303800/Glyma.06G183900/Glyma.01G031500…	39
16 h	00945	Stilbenoid, diarylheptanoid and gingerol biosynthesis	16/3419	38/14423	0.00919639	0.0363476	0.0244315	Glyma.14G205200/Glyma.10G060700/Glyma.03G122000/Glyma.02G069100/Glyma.02G236500/Glyma.19G126000/Glyma.07G021600/Glyma.07G214700/Glyma.08G220200/Glyma.02G103500/Glyma.18G104000/Glyma.17G171100/Glyma.13G371000/Glyma.01G187700/Glyma.08G311500/Glyma.18G113100	16
16 h	00750	Vitamin B6 metabolism	11/3419	23/14423	0.00982777	0.0379398	0.0255017	Glyma.03G060100/Glyma.15G087200/Glyma.04G093600/Glyma.13G225000/Glyma.06G133700/Glyma.04G231451/Glyma.08G194900/Glyma.07G011900/Glyma.15G023000/Glyma.13G351600/Glyma.07G011700	11
16 h	00564	Glycerophospholipid metabolism	54/3419	171/14423	0.0111274	0.0419807	0.0282179	Glyma.15G152100/Glyma.17G077100/Glyma.04G033600/Glyma.19G142500/Glyma.04G148300/Glyma.08G181200/Glyma.06G220300/Glyma.02G093500/Glyma.03G008300/Glyma.12G045700/Glyma.16G110900/Glyma.10G183200/Glyma.13G134500/Glyma.10G046400/Glyma.19G233400/Glyma.02G078500/Glyma.05G020500/Glyma.11G178400/Glyma.19G132900/Glyma.19G175600/Glyma.06G176400/Glyma.05G168300/Glyma.06G033800/Glyma.02G218700/Glyma.19G136100…	54
20 h	09159	Environmental adaptation	208/3627	467/14423	1.62759e-20	2.7018e-18	1.90171e-18	Glyma.15G051600/Glyma.15G048600/Glyma.08G317700/Glyma.14G074300/Glyma.06G223800/Glyma.12G039400/Glyma.08G316500/Glyma.16G218200/Glyma.11G050000/Glyma.17G251000/Glyma.06G103200/Glyma.20G054500/Glyma.02G048300/Glyma.08G180800/Glyma.08G078200/Glyma.02G138800/Glyma.04G204400/Glyma.19G068300/Glyma.04G050200/Glyma.07G051600/Glyma.14G006800/Glyma.06G320700/Glyma.08G360600/Glyma.14G165700/Glyma.04G166300…	208
20 h	04626	Plant-pathogen interaction	173/3627	368/14423	3.45899e-20	2.87097e-18	2.02078e-18	Glyma.15G051600/Glyma.15G048600/Glyma.08G317700/Glyma.14G074300/Glyma.06G223800/Glyma.12G039400/Glyma.08G316500/Glyma.16G218200/Glyma.17G251000/Glyma.20G054500/Glyma.02G048300/Glyma.08G180800/Glyma.08G078200/Glyma.02G138800/Glyma.04G204400/Glyma.19G068300/Glyma.07G051600/Glyma.14G006800/Glyma.06G320700/Glyma.08G360600/Glyma.14G165700/Glyma.07G003200/Glyma.07G238700/Glyma.05G198700/Glyma.05G123200…	173
20 h	99980	Enzymes with EC numbers	160/3627	402/14423	4.12523e-11	2.28263e-09	1.60667e-09	Glyma.10G167200/Glyma.19G061900/Glyma.08G059300/Glyma.13G099600/Glyma.03G069700/Glyma.14G182100/Glyma.02G244100/Glyma.13G348200/Glyma.13G113200/Glyma.02G049400/Glyma.08G268900/Glyma.07G189900/Glyma.03G242000/Glyma.08G210900/Glyma.15G056800/Glyma.17G125500/Glyma.09G008500/Glyma.06G175900/Glyma.04G093600/Glyma.05G042700/Glyma.19G175900/Glyma.07G222400/Glyma.07G174800/Glyma.13G069100/Glyma.19G239400…	160
20 h	01001	Protein kinases	175/3627	454/14423	1.09644e-10	4.55022e-09	3.20275e-09	Glyma.15G102500/Glyma.15G051600/Glyma.03G243500/Glyma.14G094400/Glyma.18G240600/Glyma.10G009900/Glyma.06G029700/Glyma.13G002100/Glyma.02G310400/Glyma.15G048600/Glyma.13G151100/Glyma.02G235700/Glyma.10G124200/Glyma.10G038400/Glyma.20G114300/Glyma.20G229800/Glyma.08G316500/Glyma.17G083100/Glyma.16G088700/Glyma.11G050000/Glyma.02G180100/Glyma.16G104600/Glyma.13G215200/Glyma.03G245500/Glyma.17G053500…	175
20 h	09191	Unclassified: metabolism	162/3627	415/14423	1.80257e-10	5.98453e-09	4.21232e-09	Glyma.10G167200/Glyma.19G061900/Glyma.08G059300/Glyma.13G099600/Glyma.03G069700/Glyma.14G182100/Glyma.02G244100/Glyma.13G348200/Glyma.13G113200/Glyma.02G049400/Glyma.08G268900/Glyma.07G189900/Glyma.07G066700/Glyma.03G242000/Glyma.08G210900/Glyma.15G056800/Glyma.17G125500/Glyma.09G008500/Glyma.06G175900/Glyma.04G093600/Glyma.05G042700/Glyma.19G175900/Glyma.07G222400/Glyma.07G174800/Glyma.13G069100…	162
20 h	00630	Glyoxylate and dicarboxylate metabolism	61/3627	118/14423	4.97181e-10	1.37553e-08	9.68194e-09	Glyma.13G361400/Glyma.07G221300/Glyma.08G311200/Glyma.11G043900/Glyma.08G108900/Glyma.07G019900/Glyma.05G060500/Glyma.01G026700/Glyma.13G097100/Glyma.14G026400/Glyma.14G223500/Glyma.13G308700/Glyma.09G004700/Glyma.01G199700/Glyma.12G193800/Glyma.07G185400/Glyma.04G017500/Glyma.03G128300/Glyma.13G046200/Glyma.11G042200/Glyma.15G016100/Glyma.05G141400/Glyma.15G012500/Glyma.14G184500/Glyma.19G130800…	61
20 h	04016	MAPK signaling pathway - plant	90/3627	208/14423	7.3906e-09	1.75263e-07	1.23362e-07	Glyma.15G051600/Glyma.16G009300/Glyma.15G048600/Glyma.13G151100/Glyma.02G250200/Glyma.13G145100/Glyma.08G005100/Glyma.19G191600/Glyma.08G180800/Glyma.08G078200/Glyma.02G138800/Glyma.02G165800/Glyma.19G068300/Glyma.14G223500/Glyma.14G108400/Glyma.13G076700/Glyma.03G216700/Glyma.09G002600/Glyma.14G165700/Glyma.07G003200/Glyma.14G066400/Glyma.07G238700/Glyma.07G056900/Glyma.05G198700/Glyma.05G123200…	90
20 h	00053	Ascorbate and aldarate metabolism	38/3627	74/14423	1.11672e-06	2.3172e-05	1.63101e-05	Glyma.08G243000/Glyma.U031121/Glyma.19G244600/Glyma.18G092900/Glyma.12G073100/Glyma.19G061200/Glyma.17G091000/Glyma.06G068200/Glyma.11G150243/Glyma.13G057700/Glyma.02G292800/Glyma.10G162000/Glyma.12G032300/Glyma.20G224400/Glyma.18G265100/Glyma.17G077000/Glyma.06G114400/Glyma.05G022600/Glyma.04G009800/Glyma.14G152100/Glyma.16G073100/Glyma.06G183900/Glyma.19G028500/Glyma.11G107200/Glyma.13G076900/G…	38
20 h	00520	Amino sugar and nucleotide sugar metabolism	99/3627	258/14423	1.55202e-06	2.86262e-05	2.0149e-05	Glyma.13G133800/Glyma.13G058100/Glyma.08G309900/Glyma.11G223700/Glyma.19G028100/Glyma.08G243000/Glyma.05G132100/Glyma.18G272200/Glyma.17G132500/Glyma.08G033300/Glyma.09G017000/Glyma.12G064600/Glyma.02G250800/Glyma.12G201500/Glyma.17G257800/Glyma.19G244600/Glyma.05G152300/Glyma.01G167500/Glyma.18G264700/Glyma.03G006900/Glyma.03G027300/Glyma.11G141200/Glyma.10G045800/Glyma.11G116600/Glyma.11G141300…	99
20 h	00410	beta-Alanine metabolism	43/3627	89/14423	1.90413e-06	3.16086e-05	2.22483e-05	Glyma.14G032300/Glyma.08G276400/Glyma.02G282000/Glyma.15G055500/Glyma.06G178400/Glyma.09G168900/Glyma.09G007100/Glyma.15G111500/Glyma.03G117300/Glyma.08G282800/Glyma.17G091000/Glyma.07G151500/Glyma.16G080900/Glyma.08G307800/Glyma.05G180100/Glyma.18G116300/Glyma.14G152100/Glyma.18G109900/Glyma.16G218500/Glyma.01G062400/Glyma.06G183900/Glyma.09G227500/Glyma.18G043600/Glyma.02G278600/Glyma.11G035200…	43
20 h	00561	Glycerolipid metabolism	51/3627	117/14423	9.81116e-06	0.000148059	0.000104214	Glyma.13G361400/Glyma.17G077100/Glyma.19G175600/Glyma.17G091000/Glyma.09G207900/Glyma.13G162600/Glyma.05G196100/Glyma.01G113000/Glyma.03G174900/Glyma.14G077500/Glyma.12G045700/Glyma.15G012500/Glyma.09G263300/Glyma.19G132900/Glyma.06G220300/Glyma.13G093100/Glyma.13G134500/Glyma.18G197600/Glyma.10G046400/Glyma.03G008300/Glyma.14G152100/Glyma.07G069700/Glyma.03G130900/Glyma.06G183900/Glyma.13G101400…	51
20 h	00591	Linoleic acid metabolism	25/3627	45/14423	1.28441e-05	0.000177676	0.000125061	Glyma.08G102900/Glyma.19G132900/Glyma.07G039900/Glyma.08G189600/Glyma.16G008700/Glyma.03G130900/Glyma.02G190000/Glyma.13G239000/Glyma.19G263300/Glyma.12G054700/Glyma.11G130200/Glyma.U039300/Glyma.20G144600/Glyma.07G034900/Glyma.07G034800/Glyma.07G007000/Glyma.10G249100/Glyma.13G030300/Glyma.03G264300/Glyma.15G026400/Glyma.07G196800/Glyma.15G026500/Glyma.11G130300/Glyma.07G006900/Glyma.13G347700	25
20 h	01003	Glycosyltransferases	114/3627	320/14423	1.61823e-05	0.000206635	0.000145444	Glyma.11G243000/Glyma.02G100600/Glyma.13G058100/Glyma.08G309900/Glyma.19G028100/Glyma.18G272200/Glyma.13G261000/Glyma.15G275000/Glyma.10G270800/Glyma.09G017000/Glyma.07G046500/Glyma.02G080900/Glyma.12G201500/Glyma.06G240600/Glyma.06G129400/Glyma.20G120300/Glyma.06G034800/Glyma.20G174300/Glyma.18G264700/Glyma.16G165900/Glyma.05G086900/Glyma.06G184200/Glyma.07G081600/Glyma.10G224000/Glyma.03G159200…	114
20 h	00903	Limonene and pinene degradation	13/3627	18/14423	3.61926e-05	0.00042914	0.000302058	Glyma.17G091000/Glyma.14G152100/Glyma.06G183900/Glyma.13G170600/Glyma.16G131700/Glyma.01G031500/Glyma.02G034000/Glyma.02G051500/Glyma.06G114300/Glyma.04G248500/Glyma.13G340000/Glyma.15G034400/Glyma.12G057400	13
20 h	09109	Metabolism of terpenoids and polyketides	108/3627	309/14423	6.60368e-05	0.000711255	0.000500629	Glyma.11G021400/Glyma.17G132500/Glyma.02G272200/Glyma.03G128900/Glyma.09G148500/Glyma.18G229700/Glyma.01G215500/Glyma.04G069600/Glyma.14G059900/Glyma.02G240200/Glyma.02G273100/Glyma.02G059000/Glyma.04G055600/Glyma.04G237000/Glyma.16G200200/Glyma.17G174500/Glyma.13G147500/Glyma.07G001300/Glyma.19G251000/Glyma.19G236200/Glyma.16G099800/Glyma.17G091000/Glyma.13G262200/Glyma.18G111900/Glyma.01G156700…	108
20 h	00280	Valine, leucine and isoleucine degradation	40/3627	91/14423	6.85547e-05	0.000711255	0.000500629	Glyma.20G077000/Glyma.08G276400/Glyma.07G213500/Glyma.09G042000/Glyma.12G071100/Glyma.09G148500/Glyma.01G215500/Glyma.08G204300/Glyma.10G124700/Glyma.10G028700/Glyma.16G200200/Glyma.11G154423/Glyma.03G117300/Glyma.15G150900/Glyma.17G091000/Glyma.01G103100/Glyma.16G080900/Glyma.08G307800/Glyma.01G129400/Glyma.17G132300/Glyma.11G027000/Glyma.03G070200/Glyma.14G152100/Glyma.20G043000/Glyma.14G036600…	40
20 h	00062	Fatty acid elongation	24/3627	46/14423	7.51706e-05	0.000734019	0.000516653	Glyma.09G260200/Glyma.14G074300/Glyma.17G251000/Glyma.18G232000/Glyma.11G245600/Glyma.08G279700/Glyma.05G011100/Glyma.03G260300/Glyma.01G207200/Glyma.18G146900/Glyma.04G149300/Glyma.06G058500/Glyma.20G115500/Glyma.18G011500/Glyma.15G042500/Glyma.04G057800/Glyma.11G144809/Glyma.08G261100/Glyma.10G291700/Glyma.02G001500/Glyma.10G274400/Glyma.20G210900/Glyma.10G179400/Glyma.10G001800	24
20 h	04040	Ion channels	39/3627	89/14423	9.12556e-05	0.000841579	0.000592361	Glyma.13G308500/Glyma.06G223800/Glyma.13G308400/Glyma.16G218200/Glyma.16G111700/Glyma.01G193700/Glyma.14G161600/Glyma.18G263900/Glyma.13G161800/Glyma.06G126600/Glyma.12G204400/Glyma.09G168700/Glyma.03G257000/Glyma.06G077600/Glyma.14G014100/Glyma.19G221000/Glyma.05G077100/Glyma.07G056400/Glyma.13G296900/Glyma.12G099500/Glyma.13G324600/Glyma.10G053900/Glyma.11G087100/Glyma.01G157900/Glyma.02G299700…	39
20 h	09108	Metabolism of cofactors and vitamins	149/3627	453/14423	0.000105029	0.00091762	0.000645883	Glyma.15G025600/Glyma.03G212300/Glyma.12G229700/Glyma.02G301700/Glyma.14G032300/Glyma.12G020100/Glyma.18G158900/Glyma.02G143700/Glyma.08G108900/Glyma.06G316900/Glyma.05G001000/Glyma.01G238400/Glyma.06G051100/Glyma.03G203800/Glyma.02G282000/Glyma.20G179400/Glyma.05G060500/Glyma.10G128400/Glyma.03G060100/Glyma.04G069600/Glyma.14G003200/Glyma.04G210000/Glyma.11G235400/Glyma.04G254600/Glyma.02G218300…	149
20 h	09106	Metabolism of other amino acids	123/3627	365/14423	0.00013275	0.00110183	0.000775542	Glyma.12G163700/Glyma.14G032300/Glyma.08G276400/Glyma.08G108900/Glyma.16G063200/Glyma.02G282000/Glyma.16G038300/Glyma.18G190300/Glyma.18G021100/Glyma.16G000200/Glyma.19G177200/Glyma.15G055500/Glyma.06G178400/Glyma.09G168900/Glyma.09G007100/Glyma.15G111500/Glyma.01G156600/Glyma.19G114500/Glyma.05G018300/Glyma.03G117300/Glyma.11G176400/Glyma.05G005300/Glyma.08G282800/Glyma.18G137100/Glyma.12G073100…	123
20 h	04070	Phosphatidylinositol signaling system	46/3627	115/14423	0.000312165	0.00246759	0.00173686	Glyma.15G046400/Glyma.07G216600/Glyma.17G077100/Glyma.01G189500/Glyma.18G255000/Glyma.10G255000/Glyma.08G186400/Glyma.20G013500/Glyma.06G218300/Glyma.06G109400/Glyma.19G068300/Glyma.09G241100/Glyma.14G059200/Glyma.20G173200/Glyma.04G030000/Glyma.04G088000/Glyma.10G060000/Glyma.07G238700/Glyma.04G253100/Glyma.10G183200/Glyma.08G127700/Glyma.13G065500/Glyma.05G196100/Glyma.11G230000/Glyma.18G027200…	46
20 h	00260	Glycine, serine and threonine metabolism	47/3627	119/14423	0.000380519	0.00283513	0.00199556	Glyma.13G361400/Glyma.07G221300/Glyma.08G108900/Glyma.07G019900/Glyma.01G026700/Glyma.17G057700/Glyma.06G178400/Glyma.09G270500/Glyma.13G049500/Glyma.09G004700/Glyma.01G199700/Glyma.08G282800/Glyma.04G104500/Glyma.05G180500/Glyma.19G102100/Glyma.13G087800/Glyma.11G042200/Glyma.15G016100/Glyma.15G012500/Glyma.14G184500/Glyma.01G129400/Glyma.07G081900/Glyma.17G132100/Glyma.03G250800/Glyma.17G012000…	47
20 h	00710	Carbon fixation in photosynthetic organisms	46/3627	116/14423	0.00039282	0.00283513	0.00199556	Glyma.16G013900/Glyma.15G019300/Glyma.11G043900/Glyma.18G030400/Glyma.01G026700/Glyma.07G045900/Glyma.13G097100/Glyma.19G106800/Glyma.09G210900/Glyma.01G010200/Glyma.12G161300/Glyma.07G185400/Glyma.06G087800/Glyma.20G192200/Glyma.20G122500/Glyma.13G046200/Glyma.07G142700/Glyma.07G074700/Glyma.13G270400/Glyma.10G293500/Glyma.10G205500/Glyma.04G015900/Glyma.16G077800/Glyma.06G015900/Glyma.20G125200…	46
20 h	00071	Fatty acid degradation	37/3627	89/14423	0.000487099	0.0033691	0.00237141	Glyma.20G077000/Glyma.09G042000/Glyma.11G254100/Glyma.10G249700/Glyma.02G274000/Glyma.10G124700/Glyma.02G274100/Glyma.15G150900/Glyma.11G017900/Glyma.17G091000/Glyma.07G151500/Glyma.09G161600/Glyma.11G122500/Glyma.05G151200/Glyma.05G180100/Glyma.20G143900/Glyma.20G060300/Glyma.14G152100/Glyma.12G015300/Glyma.06G183900/Glyma.07G161900/Glyma.14G042000/Glyma.11G035200/Glyma.14G042200/Glyma.19G218300…	37
20 h	99997	Function unknown	24/3627	51/14423	0.000566713	0.00376297	0.00264864	Glyma.13G111600/Glyma.03G066000/Glyma.13G105000/Glyma.05G213000/Glyma.13G107800/Glyma.13G113900/Glyma.11G131700/Glyma.11G082000/Glyma.12G191200/Glyma.17G002900/Glyma.01G161700/Glyma.08G019500/Glyma.17G051500/Glyma.07G271000/Glyma.17G054200/Glyma.17G045900/Glyma.10G177000/Glyma.20G213200/Glyma.20G247000/Glyma.20G164100/Glyma.11G110000/Glyma.12G036900/Glyma.10G229000/Glyma.07G273000	24
20 h	04146	Peroxisome	53/3627	142/14423	0.000835664	0.0053354	0.00375541	Glyma.18G030100/Glyma.17G089700/Glyma.08G203400/Glyma.20G077000/Glyma.10G117100/Glyma.13G340300/Glyma.03G018700/Glyma.11G254100/Glyma.17G009400/Glyma.10G249700/Glyma.10G124700/Glyma.14G223500/Glyma.12G221000/Glyma.07G080200/Glyma.20G004600/Glyma.09G007100/Glyma.15G111500/Glyma.03G119400/Glyma.05G005300/Glyma.19G236200/Glyma.11G017900/Glyma.15G266700/Glyma.07G151500/Glyma.04G017500/Glyma.09G281200…	53
20 h	00072	Synthesis and degradation of ketone bodies	9/3627	13/14423	0.00103023	0.00633404	0.00445833	Glyma.09G148500/Glyma.01G215500/Glyma.16G200200/Glyma.17G132300/Glyma.11G027000/Glyma.20G043000/Glyma.14G036600/Glyma.07G235400/Glyma.02G277900	9
20 h	00650	Butanoate metabolism	18/3627	36/14423	0.00113336	0.0067192	0.00472943	Glyma.09G148500/Glyma.01G215500/Glyma.11G096200/Glyma.09G168900/Glyma.16G200200/Glyma.17G132300/Glyma.11G027000/Glyma.06G254700/Glyma.20G043000/Glyma.14G036600/Glyma.07G235400/Glyma.16G028700/Glyma.16G218500/Glyma.07G059800/Glyma.18G043600/Glyma.14G211100/Glyma.02G277900/Glyma.11G213000	18
20 h	00906	Carotenoid biosynthesis	23/3627	51/14423	0.00151293	0.00843545	0.00593744	Glyma.02G272200/Glyma.03G128900/Glyma.02G240200/Glyma.17G174500/Glyma.13G147500/Glyma.19G251000/Glyma.18G111900/Glyma.10G086700/Glyma.20G227900/Glyma.09G252800/Glyma.11G151700/Glyma.15G172200/Glyma.18G239900/Glyma.09G066200/Glyma.14G045100/Glyma.01G154900/Glyma.14G209700/Glyma.08G306200/Glyma.19G160300/Glyma.11G161947/Glyma.09G000600/Glyma.08G176300/Glyma.02G104300	23
20 h	00910	Nitrogen metabolism	26/3627	60/14423	0.00157465	0.00843545	0.00593744	Glyma.08G196200/Glyma.07G012500/Glyma.02G035000/Glyma.03G128300/Glyma.10G005200/Glyma.19G130800/Glyma.01G030500/Glyma.08G284000/Glyma.02G244000/Glyma.17G161900/Glyma.16G041200/Glyma.13G257200/Glyma.09G173200/Glyma.18G041100/Glyma.11G215500/Glyma.15G057700/Glyma.03G133600/Glyma.18G141900/Glyma.02G213700/Glyma.13G210800/Glyma.15G102000/Glyma.13G084000/Glyma.18G138400/Glyma.19G007700/Glyma.05G007100…	26
20 h	09194	Poorly characterized	27/3627	63/14423	0.00157529	0.00843545	0.00593744	Glyma.13G111600/Glyma.03G066000/Glyma.13G105000/Glyma.05G213000/Glyma.13G107800/Glyma.13G113900/Glyma.11G131700/Glyma.11G082000/Glyma.12G191200/Glyma.17G002900/Glyma.01G161700/Glyma.08G019500/Glyma.17G069700/Glyma.17G051500/Glyma.07G271000/Glyma.17G054200/Glyma.17G045900/Glyma.20G144800/Glyma.10G177000/Glyma.01G093200/Glyma.20G213200/Glyma.20G247000/Glyma.20G164100/Glyma.11G110000/Glyma.12G036900…	27
20 h	00565	Ether lipid metabolism	21/3627	46/14423	0.00198471	0.010236	0.00720478	Glyma.07G080800/Glyma.06G169100/Glyma.04G033600/Glyma.15G152100/Glyma.02G093500/Glyma.06G061500/Glyma.06G033800/Glyma.01G215100/Glyma.11G178400/Glyma.19G132900/Glyma.05G168300/Glyma.16G081200/Glyma.18G288600/Glyma.03G130900/Glyma.06G068700/Glyma.02G190000/Glyma.18G265800/Glyma.06G020500/Glyma.06G068600/Glyma.13G364900/Glyma.03G092800	21
20 h	01009	Protein phosphatases and associated proteins	143/3627	460/14423	0.00203486	0.010236	0.00720478	Glyma.04G087200/Glyma.08G195200/Glyma.13G002100/Glyma.02G295600/Glyma.19G077700/Glyma.14G017800/Glyma.02G235700/Glyma.01G189500/Glyma.09G285800/Glyma.15G072000/Glyma.17G208400/Glyma.03G245500/Glyma.03G251500/Glyma.08G257900/Glyma.01G038800/Glyma.15G236700/Glyma.04G101400/Glyma.02G257400/Glyma.09G195800/Glyma.19G068300/Glyma.04G059000/Glyma.03G091100/Glyma.14G101400/Glyma.08G008600/Glyma.08G029600…	143
20 h	00330	Arginine and proline metabolism	43/3627	115/14423	0.00236344	0.0115392	0.00812205	Glyma.01G071300/Glyma.14G032300/Glyma.05G141900/Glyma.02G282000/Glyma.05G104400/Glyma.17G083400/Glyma.20G248500/Glyma.18G137100/Glyma.17G021200/Glyma.17G091000/Glyma.17G092400/Glyma.10G297300/Glyma.17G163900/Glyma.06G126700/Glyma.08G106000/Glyma.02G128000/Glyma.18G116300/Glyma.08G288100/Glyma.05G029100/Glyma.06G007500/Glyma.14G152100/Glyma.06G183900/Glyma.08G255800/Glyma.09G227500/Glyma.10G259100…	43
20 h	01004	Lipid biosynthesis proteins	54/3627	152/14423	0.00271018	0.012854	0.00904751	Glyma.07G080800/Glyma.09G260200/Glyma.11G254100/Glyma.02G139600/Glyma.04G033600/Glyma.07G075500/Glyma.10G249700/Glyma.19G147400/Glyma.17G120400/Glyma.18G246900/Glyma.19G233400/Glyma.18G232000/Glyma.04G204300/Glyma.11G245600/Glyma.11G017900/Glyma.03G015500/Glyma.03G056700/Glyma.09G207900/Glyma.08G279700/Glyma.06G033800/Glyma.03G144500/Glyma.11G122500/Glyma.14G077500/Glyma.05G151200/Glyma.04G151600…	54
20 h	00562	Inositol phosphate metabolism	40/3627	107/14423	0.00330062	0.0152195	0.0107125	Glyma.15G046400/Glyma.07G216600/Glyma.08G276400/Glyma.01G189500/Glyma.06G169100/Glyma.10G255000/Glyma.08G186400/Glyma.20G013500/Glyma.06G218300/Glyma.06G109400/Glyma.14G059200/Glyma.20G173200/Glyma.04G030000/Glyma.04G088000/Glyma.10G060000/Glyma.04G253100/Glyma.08G127700/Glyma.11G178400/Glyma.11G230000/Glyma.18G027200/Glyma.16G081200/Glyma.07G107000/Glyma.02G257200/Glyma.05G197200/Glyma.14G059400…	40
20 h	00908	Zeatin biosynthesis	21/3627	48/14423	0.00374407	0.0165806	0.0116705	Glyma.04G055600/Glyma.18G274400/Glyma.10G062200/Glyma.08G365000/Glyma.20G116500/Glyma.14G099000/Glyma.15G103800/Glyma.03G151800/Glyma.09G063900/Glyma.15G170300/Glyma.18G297200/Glyma.02G148600/Glyma.03G186900/Glyma.12G011400/Glyma.10G025300/Glyma.03G187000/Glyma.19G187100/Glyma.19G187000/Glyma.19G135100/Glyma.09G225400/Glyma.03G187700	21
20 h	00592	alpha-Linolenic acid metabolism	37/3627	98/14423	0.00379555	0.0165806	0.0116705	Glyma.20G077000/Glyma.10G124700/Glyma.17G050000/Glyma.18G280900/Glyma.08G102900/Glyma.07G151500/Glyma.05G180100/Glyma.19G132900/Glyma.07G039900/Glyma.17G246500/Glyma.14G223200/Glyma.16G008700/Glyma.08G256600/Glyma.03G130900/Glyma.14G223600/Glyma.17G209900/Glyma.01G235600/Glyma.12G191400/Glyma.13G047300/Glyma.02G190000/Glyma.13G239000/Glyma.13G109700/Glyma.19G044900/Glyma.11G035200/Glyma.13G070900…	37
20 h	00564	Glycerophospholipid metabolism	58/3627	171/14423	0.00615366	0.0261925	0.0184361	Glyma.06G216800/Glyma.07G080800/Glyma.17G077100/Glyma.06G169100/Glyma.04G033600/Glyma.15G152100/Glyma.19G233400/Glyma.04G148300/Glyma.02G093500/Glyma.19G175600/Glyma.10G183200/Glyma.02G078500/Glyma.05G020500/Glyma.09G207900/Glyma.06G061500/Glyma.05G196100/Glyma.06G033800/Glyma.03G174900/Glyma.14G077500/Glyma.12G045700/Glyma.16G110900/Glyma.01G215100/Glyma.11G178400/Glyma.19G132900/Glyma.05G168300…	58
20 h	00130	Ubiquinone and other terpenoid-quinone biosynthesis	30/3627	78/14423	0.00634891	0.026348	0.0185455	Glyma.02G143700/Glyma.06G084100/Glyma.01G177600/Glyma.07G188200/Glyma.11G194500/Glyma.01G232400/Glyma.14G205200/Glyma.15G130500/Glyma.12G216900/Glyma.13G284200/Glyma.02G236500/Glyma.15G001700/Glyma.11G010500/Glyma.13G095600/Glyma.09G024500/Glyma.02G002000/Glyma.17G064600/Glyma.13G249600/Glyma.11G120200/Glyma.08G061200/Glyma.20G245100/Glyma.15G064700/Glyma.18G139700/Glyma.12G014300/Glyma.09G222800…	30
20 h	00945	Stilbenoid, diarylheptanoid and gingerol biosynthesis	17/3627	38/14423	0.00665922	0.0269617	0.0189775	Glyma.18G103500/Glyma.14G205200/Glyma.03G122000/Glyma.19G126000/Glyma.10G060700/Glyma.02G236500/Glyma.07G021600/Glyma.08G220200/Glyma.07G214700/Glyma.13G371000/Glyma.18G104000/Glyma.02G103500/Glyma.17G171100/Glyma.02G069100/Glyma.08G311500/Glyma.01G187700/Glyma.18G113100	17
20 h	00770	Pantothenate and CoA biosynthesis	29/3627	77/14423	0.0100332	0.0396551	0.027912	Glyma.03G212300/Glyma.14G032300/Glyma.02G282000/Glyma.04G254600/Glyma.13G154600/Glyma.15G055500/Glyma.17G091000/Glyma.18G116300/Glyma.08G285700/Glyma.02G164100/Glyma.18G139100/Glyma.08G028900/Glyma.14G152100/Glyma.01G173050/Glyma.06G183900/Glyma.02G278600/Glyma.08G303800/Glyma.13G170600/Glyma.16G131700/Glyma.01G031500/Glyma.02G034000/Glyma.02G051500/Glyma.06G114300/Glyma.14G209400/Glyma.04G248500…	29
20 h	00500	Starch and sucrose metabolism	75/3627	235/14423	0.0110665	0.042722	0.0300706	Glyma.08G033300/Glyma.10G270800/Glyma.08G028400/Glyma.17G257800/Glyma.06G129400/Glyma.20G120300/Glyma.16G217900/Glyma.17G109700/Glyma.11G176400/Glyma.11G116600/Glyma.06G184200/Glyma.13G161600/Glyma.02G033500/Glyma.05G219200/Glyma.14G218800/Glyma.04G180900/Glyma.12G005200/Glyma.02G018700/Glyma.05G179800/Glyma.06G104800/Glyma.19G113600/Glyma.20G153600/Glyma.11G127200/Glyma.15G029800/Glyma.17G242400…	75

## Sheet: Gmgrf5a-Down
Cluster	ID	Description	GeneRatio	BgRatio	pvalue	p.adjust	qvalue	geneID	Count
0 h	09159	Environmental adaptation	205/3346	467/14423	8.18917e-24	1.35121e-21	9.91321e-22	Glyma.04G157200/Glyma.02G138800/Glyma.05G212500/Glyma.08G360600/Glyma.06G012500/Glyma.17G231600/Glyma.17G118700/Glyma.04G050200/Glyma.20G054500/Glyma.05G198700/Glyma.06G223800/Glyma.11G050000/Glyma.20G170000/Glyma.18G166800/Glyma.08G180800/Glyma.06G320700/Glyma.16G163200/Glyma.04G253500/Glyma.04G166300/Glyma.13G106900/Glyma.05G011100/Glyma.08G317700/Glyma.01G192100/Glyma.03G084000/Glyma.06G103200…	205		Down-regulated' means that gene expressions were decreased in seeds, compared to pod walls
0 h	04626	Plant-pathogen interaction	168/3346	368/14423	7.30498e-22	6.02661e-20	4.42144e-20	Glyma.04G157200/Glyma.02G138800/Glyma.05G212500/Glyma.08G360600/Glyma.06G012500/Glyma.17G118700/Glyma.20G054500/Glyma.05G198700/Glyma.06G223800/Glyma.18G166800/Glyma.08G180800/Glyma.06G320700/Glyma.04G253500/Glyma.13G106900/Glyma.05G011100/Glyma.08G317700/Glyma.03G084000/Glyma.14G006800/Glyma.07G003200/Glyma.20G249600/Glyma.18G101100/Glyma.08G323200/Glyma.17G052400/Glyma.15G051600/Glyma.01G171000…	168
0 h	01001	Protein kinases	170/3346	454/14423	2.99889e-12	1.64939e-10	1.21008e-10	Glyma.08G005100/Glyma.14G028100/Glyma.15G269800/Glyma.05G016900/Glyma.03G140100/Glyma.02G138800/Glyma.07G189200/Glyma.18G212800/Glyma.08G360600/Glyma.03G243500/Glyma.10G275400/Glyma.16G088700/Glyma.03G245500/Glyma.05G157200/Glyma.18G240600/Glyma.17G083100/Glyma.14G139800/Glyma.17G178800/Glyma.13G274500/Glyma.04G207900/Glyma.15G102500/Glyma.20G229800/Glyma.20G009600/Glyma.20G054500/Glyma.09G252000…	170		The top 50 enriched KEGG pathways showed here.
0 h	99980	Enzymes with EC numbers	153/3346	402/14423	8.87041e-12	3.65904e-10	2.68446e-10	Glyma.13G099600/Glyma.16G073600/Glyma.04G093600/Glyma.08G315900/Glyma.03G069700/Glyma.09G015400/Glyma.02G049400/Glyma.19G239400/Glyma.06G208900/Glyma.08G093900/Glyma.02G129500/Glyma.08G059300/Glyma.05G042700/Glyma.09G008500/Glyma.18G003200/Glyma.11G253900/Glyma.17G125500/Glyma.07G189900/Glyma.13G253800/Glyma.19G136400/Glyma.18G142500/Glyma.03G033200/Glyma.13G348200/Glyma.15G112900/Glyma.05G138700…	153
0 h	09191	Unclassified: metabolism	155/3346	415/14423	3.49317e-11	1.15275e-09	8.45714e-10	Glyma.13G099600/Glyma.16G073600/Glyma.04G093600/Glyma.08G315900/Glyma.03G069700/Glyma.09G015400/Glyma.02G049400/Glyma.19G239400/Glyma.06G208900/Glyma.08G093900/Glyma.02G129500/Glyma.08G059300/Glyma.05G042700/Glyma.09G008500/Glyma.18G003200/Glyma.11G253900/Glyma.17G125500/Glyma.07G189900/Glyma.13G253800/Glyma.19G136400/Glyma.18G142500/Glyma.03G033200/Glyma.13G348200/Glyma.15G112900/Glyma.05G138700…	155
0 h	04016	MAPK signaling pathway - plant	90/3346	208/14423	9.3012e-11	2.55783e-09	1.87656e-09	Glyma.08G005100/Glyma.02G138800/Glyma.05G212500/Glyma.15G031800/Glyma.16G009300/Glyma.17G178800/Glyma.13G041800/Glyma.20G009600/Glyma.05G198700/Glyma.02G250200/Glyma.03G216700/Glyma.08G180800/Glyma.04G253500/Glyma.02G165800/Glyma.14G223500/Glyma.14G108400/Glyma.19G191600/Glyma.13G145100/Glyma.13G076700/Glyma.07G003200/Glyma.15G051600/Glyma.08G078200/Glyma.07G056900/Glyma.14G066400/Glyma.14G165700…	90
0 h	01003	Glycosyltransferases	112/3346	320/14423	9.04252e-07	2.13145e-05	1.56374e-05	Glyma.20G174300/Glyma.18G220200/Glyma.10G270800/Glyma.18G136200/Glyma.08G324800/Glyma.12G129800/Glyma.05G086900/Glyma.10G128800/Glyma.12G201500/Glyma.01G048500/Glyma.06G240600/Glyma.18G085200/Glyma.20G120300/Glyma.13G050600/Glyma.15G275000/Glyma.07G046500/Glyma.19G028100/Glyma.01G113000/Glyma.04G153700/Glyma.13G058100/Glyma.06G292500/Glyma.06G034800/Glyma.10G224000/Glyma.18G264700/Glyma.09G263300…	112
0 h	04040	Ion channels	41/3346	89/14423	1.68097e-06	3.46701e-05	2.54358e-05	Glyma.04G157200/Glyma.06G223800/Glyma.08G082200/Glyma.13G308500/Glyma.12G194100/Glyma.06G016000/Glyma.18G263900/Glyma.16G111700/Glyma.13G308400/Glyma.01G193700/Glyma.14G161600/Glyma.13G161800/Glyma.07G056400/Glyma.05G077100/Glyma.02G299700/Glyma.06G126600/Glyma.12G204400/Glyma.13G324600/Glyma.19G089800/Glyma.08G241600/Glyma.13G296900/Glyma.06G190400/Glyma.14G014100/Glyma.12G099500/Glyma.19G221000…	41
0 h	00053	Ascorbate and aldarate metabolism	35/3346	74/14423	4.54184e-06	8.32671e-05	6.10891e-05	Glyma.12G073100/Glyma.19G061200/Glyma.08G243000/Glyma.11G150243/Glyma.03G247000/Glyma.18G092900/Glyma.04G009800/Glyma.06G114400/Glyma.12G032300/Glyma.14G152100/Glyma.10G162000/Glyma.16G073100/Glyma.17G077000/Glyma.11G107200/Glyma.20G224400/Glyma.06G068200/Glyma.02G292800/Glyma.02G034000/Glyma.13G057700/Glyma.13G076900/Glyma.18G265100/Glyma.13G170600/Glyma.01G031500/Glyma.19G028500/Glyma.05G022600…	35
0 h	01009	Protein phosphatases and associated proteins	146/3346	460/14423	1.26412e-05	0.000208579	0.000153025	Glyma.15G192300/Glyma.18G010400/Glyma.15G129300/Glyma.19G077700/Glyma.03G185200/Glyma.09G195800/Glyma.03G245500/Glyma.20G218400/Glyma.03G146900/Glyma.18G279500/Glyma.04G087200/Glyma.15G139500/Glyma.08G195200/Glyma.09G034800/Glyma.18G282300/Glyma.13G002100/Glyma.02G257400/Glyma.17G120300/Glyma.02G263800/Glyma.04G059000/Glyma.15G087900/Glyma.08G257900/Glyma.17G223800/Glyma.15G072000/Glyma.07G239000…	146
0 h	00520	Amino sugar and nucleotide sugar metabolism	89/3346	258/14423	2.1834e-05	0.00032751	0.000240279	Glyma.19G257700/Glyma.18G220200/Glyma.03G006900/Glyma.18G229800/Glyma.13G133800/Glyma.12G201500/Glyma.03G259000/Glyma.12G021700/Glyma.13G050600/Glyma.09G030300/Glyma.11G141200/Glyma.19G028100/Glyma.14G218800/Glyma.12G180300/Glyma.13G058100/Glyma.08G243000/Glyma.10G018400/Glyma.18G264700/Glyma.02G250800/Glyma.03G247000/Glyma.03G159200/Glyma.07G081600/Glyma.01G167500/Glyma.14G138300/Glyma.10G045800…	89
0 h	00630	Glyoxylate and dicarboxylate metabolism	47/3346	118/14423	3.82167e-05	0.00052548	0.00038552	Glyma.14G026400/Glyma.12G098900/Glyma.08G311200/Glyma.13G308700/Glyma.14G223500/Glyma.05G141400/Glyma.09G173200/Glyma.12G193800/Glyma.13G097100/Glyma.09G015500/Glyma.14G184500/Glyma.08G157700/Glyma.07G059800/Glyma.07G185400/Glyma.02G288500/Glyma.16G028700/Glyma.03G128300/Glyma.15G012500/Glyma.07G081900/Glyma.19G130800/Glyma.17G012000/Glyma.06G017900/Glyma.04G017500/Glyma.19G046600/Glyma.18G041100…	47
0 h	00591	Linoleic acid metabolism	23/3346	45/14423	4.18336e-05	0.000530965	0.000389543	Glyma.19G132900/Glyma.07G039900/Glyma.02G190000/Glyma.U039300/Glyma.16G008700/Glyma.13G239000/Glyma.10G249100/Glyma.03G130900/Glyma.20G144600/Glyma.07G034800/Glyma.12G054700/Glyma.11G130200/Glyma.07G034900/Glyma.15G026400/Glyma.15G026500/Glyma.19G263300/Glyma.07G007000/Glyma.07G006900/Glyma.13G347700/Glyma.03G264300/Glyma.07G196800/Glyma.13G030300/Glyma.11G130300	23
0 h	99997	Function unknown	25/3346	51/14423	4.86613e-05	0.000573508	0.000420756	Glyma.08G019500/Glyma.13G111600/Glyma.17G054200/Glyma.01G161700/Glyma.03G066000/Glyma.11G082000/Glyma.13G107800/Glyma.16G205600/Glyma.13G113900/Glyma.05G213000/Glyma.06G293500/Glyma.07G271000/Glyma.17G051500/Glyma.12G191200/Glyma.11G131700/Glyma.20G213200/Glyma.20G247000/Glyma.17G045900/Glyma.20G164100/Glyma.10G177000/Glyma.17G002900/Glyma.11G110000/Glyma.12G036900/Glyma.10G229000/Glyma.07G273000	25
0 h	00410	beta-Alanine metabolism	37/3346	89/14423	8.59883e-05	0.000945872	0.000693941	Glyma.02G282000/Glyma.14G032300/Glyma.09G168900/Glyma.15G111500/Glyma.08G276400/Glyma.09G227500/Glyma.15G055500/Glyma.09G007100/Glyma.08G307800/Glyma.16G080900/Glyma.14G152100/Glyma.18G109900/Glyma.16G218500/Glyma.02G034000/Glyma.18G043600/Glyma.11G035200/Glyma.18G116300/Glyma.14G209400/Glyma.13G170600/Glyma.05G180100/Glyma.08G303800/Glyma.02G278600/Glyma.01G031500/Glyma.14G211100/Glyma.20G145200…	37
0 h	09106	Metabolism of other amino acids	115/3346	365/14423	0.000142433	0.00146885	0.00107762	Glyma.02G282000/Glyma.05G005300/Glyma.14G032300/Glyma.18G190300/Glyma.09G168900/Glyma.07G258600/Glyma.19G114500/Glyma.01G040000/Glyma.09G235400/Glyma.16G038300/Glyma.20G026300/Glyma.07G013800/Glyma.15G111500/Glyma.08G276400/Glyma.14G086300/Glyma.09G227500/Glyma.18G137100/Glyma.12G073100/Glyma.11G088200/Glyma.01G156600/Glyma.15G055500/Glyma.14G211000/Glyma.18G261600/Glyma.02G241200/Glyma.11G150243…	115
0 h	09194	Poorly characterized	28/3346	63/14423	0.000156404	0.00151804	0.00111371	Glyma.08G019500/Glyma.13G111600/Glyma.17G054200/Glyma.01G161700/Glyma.03G066000/Glyma.11G082000/Glyma.13G107800/Glyma.16G205600/Glyma.13G113900/Glyma.05G213000/Glyma.06G293500/Glyma.17G069700/Glyma.07G271000/Glyma.17G051500/Glyma.01G093200/Glyma.12G191200/Glyma.11G131700/Glyma.20G213200/Glyma.20G144800/Glyma.20G247000/Glyma.17G045900/Glyma.20G164100/Glyma.10G177000/Glyma.17G002900/Glyma.11G110000…	28
0 h	00199	Cytochrome P450	37/3346	92/14423	0.000194522	0.00178312	0.00130819	Glyma.14G059900/Glyma.07G110900/Glyma.13G120500/Glyma.05G208900/Glyma.06G202300/Glyma.15G095000/Glyma.13G147500/Glyma.02G256800/Glyma.07G162900/Glyma.12G191400/Glyma.17G118100/Glyma.03G122000/Glyma.08G365000/Glyma.14G205200/Glyma.19G162100/Glyma.05G021800/Glyma.19G126000/Glyma.20G114200/Glyma.18G239900/Glyma.02G236500/Glyma.16G089700/Glyma.18G297200/Glyma.17G246500/Glyma.13G217400/Glyma.11G074100…	37
0 h	00592	alpha-Linolenic acid metabolism	37/3346	98/14423	0.000826384	0.00717649	0.00526505	Glyma.20G077000/Glyma.17G050000/Glyma.14G156400/Glyma.04G240800/Glyma.07G162900/Glyma.12G191400/Glyma.19G132900/Glyma.01G235600/Glyma.14G223200/Glyma.07G039900/Glyma.11G035200/Glyma.02G190000/Glyma.05G180100/Glyma.16G008700/Glyma.13G239000/Glyma.17G209900/Glyma.03G130900/Glyma.17G049900/Glyma.13G109700/Glyma.17G246500/Glyma.13G047300/Glyma.19G044900/Glyma.12G054700/Glyma.11G130200/Glyma.19G011800…	37
0 h	00945	Stilbenoid, diarylheptanoid and gingerol biosynthesis	18/3346	38/14423	0.000918957	0.00758139	0.00556211	Glyma.18G103500/Glyma.18G104000/Glyma.03G122000/Glyma.14G205200/Glyma.07G214700/Glyma.19G126000/Glyma.20G114200/Glyma.02G236500/Glyma.07G021600/Glyma.17G171100/Glyma.13G371000/Glyma.08G220200/Glyma.02G069100/Glyma.01G187700/Glyma.02G103500/Glyma.11G054500/Glyma.08G311500/Glyma.18G113100	18
0 h	04712	Circadian rhythm - plant	37/3346	99/14423	0.00102889	0.00808411	0.00593093	Glyma.17G231600/Glyma.04G050200/Glyma.11G050000/Glyma.20G170000/Glyma.16G163200/Glyma.04G166300/Glyma.01G192100/Glyma.06G103200/Glyma.11G018700/Glyma.10G221500/Glyma.17G102200/Glyma.20G209900/Glyma.07G058200/Glyma.06G136600/Glyma.05G025000/Glyma.16G017400/Glyma.05G067100/Glyma.04G228300/Glyma.08G110460/Glyma.19G222000/Glyma.08G197500/Glyma.07G048500/Glyma.14G174200/Glyma.16G027200/Glyma.19G260900…	37
0 h	00910	Nitrogen metabolism	25/3346	60/14423	0.00110973	0.00832301	0.0061062	Glyma.07G012500/Glyma.10G005200/Glyma.07G212800/Glyma.01G030500/Glyma.09G173200/Glyma.02G132100/Glyma.16G041200/Glyma.03G128300/Glyma.19G130800/Glyma.13G257200/Glyma.18G041100/Glyma.17G161900/Glyma.02G244000/Glyma.11G215500/Glyma.02G213700/Glyma.15G057700/Glyma.13G210800/Glyma.03G133600/Glyma.15G102000/Glyma.18G138400/Glyma.18G141900/Glyma.06G109200/Glyma.13G084000/Glyma.19G007700/Glyma.05G007100	25
0 h	00561	Glycerolipid metabolism	42/3346	117/14423	0.0012554	0.00881846	0.00646969	Glyma.17G077100/Glyma.03G008300/Glyma.01G113000/Glyma.10G046400/Glyma.09G263300/Glyma.12G045700/Glyma.13G134500/Glyma.01G113200/Glyma.09G207900/Glyma.14G152100/Glyma.18G197600/Glyma.15G012500/Glyma.14G077500/Glyma.13G093100/Glyma.06G299200/Glyma.19G132900/Glyma.12G200100/Glyma.02G034000/Glyma.07G069700/Glyma.17G248200/Glyma.13G101400/Glyma.05G196100/Glyma.02G190000/Glyma.13G170600/Glyma.07G028600…	42
0 h	00500	Starch and sucrose metabolism	75/3346	235/14423	0.00128269	0.00881846	0.00646969	Glyma.10G270800/Glyma.07G258600/Glyma.18G136200/Glyma.12G129800/Glyma.11G111500/Glyma.20G026300/Glyma.12G021700/Glyma.20G120300/Glyma.13G161600/Glyma.14G218800/Glyma.08G025500/Glyma.05G219200/Glyma.06G104800/Glyma.11G176400/Glyma.15G182600/Glyma.16G217900/Glyma.17G109700/Glyma.12G005200/Glyma.06G318400/Glyma.20G153600/Glyma.15G029800/Glyma.02G033500/Glyma.04G235200/Glyma.11G127200/Glyma.05G226600…	75
0 h	00062	Fatty acid elongation	20/3346	46/14423	0.00183379	0.012103	0.00887941	Glyma.06G012500/Glyma.17G118700/Glyma.05G011100/Glyma.11G245600/Glyma.03G260300/Glyma.06G058500/Glyma.08G279700/Glyma.20G115500/Glyma.01G207200/Glyma.18G011500/Glyma.04G057800/Glyma.18G146900/Glyma.04G149300/Glyma.11G144809/Glyma.20G210900/Glyma.10G001800/Glyma.10G179400/Glyma.10G274400/Glyma.10G291700/Glyma.02G001500	20
0 h	00710	Carbon fixation in photosynthetic organisms	41/3346	116/14423	0.00199624	0.0126685	0.00929425	Glyma.16G013900/Glyma.19G243800/Glyma.15G019300/Glyma.16G168000/Glyma.20G122500/Glyma.13G270400/Glyma.12G161300/Glyma.20G192200/Glyma.13G097100/Glyma.19G106800/Glyma.09G210900/Glyma.01G010200/Glyma.10G205500/Glyma.06G087800/Glyma.07G185400/Glyma.16G077800/Glyma.07G074700/Glyma.07G142700/Glyma.08G182300/Glyma.06G015900/Glyma.04G015900/Glyma.19G046600/Glyma.19G046800/Glyma.10G293500/Glyma.13G290700…	41
0 h	09108	Metabolism of cofactors and vitamins	131/3346	453/14423	0.00245562	0.0150065	0.0110096	Glyma.02G282000/Glyma.04G069600/Glyma.14G032300/Glyma.04G093600/Glyma.04G177000/Glyma.06G051100/Glyma.12G020100/Glyma.19G115900/Glyma.10G128400/Glyma.14G012500/Glyma.15G087200/Glyma.19G210300/Glyma.04G254600/Glyma.09G002300/Glyma.03G206500/Glyma.14G154600/Glyma.08G157800/Glyma.03G203800/Glyma.03G212300/Glyma.15G025600/Glyma.15G055500/Glyma.01G177600/Glyma.19G148100/Glyma.04G089800/Glyma.06G159900…	131
0 h	00903	Limonene and pinene degradation	10/3346	18/14423	0.00300598	0.0177138	0.0129958	Glyma.14G152100/Glyma.02G034000/Glyma.13G170600/Glyma.01G031500/Glyma.13G340000/Glyma.06G114300/Glyma.16G131700/Glyma.04G248500/Glyma.12G057400/Glyma.15G034400	10
0 h	04070	Phosphatidylinositol signaling system	40/3346	115/14423	0.00312942	0.0178053	0.0130629	Glyma.07G216600/Glyma.17G077100/Glyma.04G213400/Glyma.18G255000/Glyma.20G207000/Glyma.10G060000/Glyma.20G173200/Glyma.13G065500/Glyma.08G186400/Glyma.06G109400/Glyma.10G183200/Glyma.09G241100/Glyma.04G253100/Glyma.20G013500/Glyma.04G009800/Glyma.18G027200/Glyma.08G127700/Glyma.14G059200/Glyma.07G238700/Glyma.02G257200/Glyma.04G088000/Glyma.11G230000/Glyma.13G093100/Glyma.06G299200/Glyma.10G218400…	40
0 h	00565	Ether lipid metabolism	19/3346	46/14423	0.00473457	0.0260402	0.0191044	Glyma.01G162100/Glyma.06G169100/Glyma.02G093500/Glyma.04G033600/Glyma.06G033800/Glyma.06G061500/Glyma.15G152100/Glyma.11G178400/Glyma.05G168300/Glyma.01G215100/Glyma.19G132900/Glyma.18G288600/Glyma.02G190000/Glyma.03G092800/Glyma.03G130900/Glyma.13G364900/Glyma.16G081200/Glyma.06G020500/Glyma.06G068700	19
0 h	00940	Phenylpropanoid biosynthesis	95/3346	323/14423	0.00537364	0.0286016	0.0209836	Glyma.06G137100/Glyma.07G258600/Glyma.20G169200/Glyma.09G002500/Glyma.04G227700/Glyma.20G026300/Glyma.20G128600/Glyma.11G049600/Glyma.11G176400/Glyma.18G103500/Glyma.09G156700/Glyma.01G232400/Glyma.07G263000/Glyma.15G001700/Glyma.08G218100/Glyma.02G018700/Glyma.18G104000/Glyma.12G195500/Glyma.10G058200/Glyma.03G122000/Glyma.19G113500/Glyma.12G054500/Glyma.14G205200/Glyma.13G307000/Glyma.07G214700…	95
0 h	01004	Lipid biosynthesis proteins	49/3346	152/14423	0.00657929	0.0339245	0.0248888	Glyma.11G122500/Glyma.03G015500/Glyma.03G056700/Glyma.11G254100/Glyma.04G204300/Glyma.03G008300/Glyma.20G143900/Glyma.02G203300/Glyma.10G249700/Glyma.11G245600/Glyma.04G033600/Glyma.06G033800/Glyma.07G205900/Glyma.07G075500/Glyma.19G233400/Glyma.11G017900/Glyma.18G246900/Glyma.09G195000/Glyma.17G120400/Glyma.12G045700/Glyma.05G218600/Glyma.01G120400/Glyma.05G151200/Glyma.01G113200/Glyma.19G147400…	49
0 h	00130	Ubiquinone and other terpenoid-quinone biosynthesis	28/3346	78/14423	0.00755607	0.0377804	0.0277177	Glyma.03G206500/Glyma.01G177600/Glyma.07G188200/Glyma.12G216900/Glyma.01G232400/Glyma.15G001700/Glyma.13G284200/Glyma.15G130500/Glyma.13G249600/Glyma.14G205200/Glyma.15G064700/Glyma.20G114200/Glyma.13G095600/Glyma.17G064600/Glyma.09G024500/Glyma.12G014300/Glyma.02G236500/Glyma.02G002000/Glyma.11G010500/Glyma.12G045300/Glyma.18G139700/Glyma.08G061200/Glyma.08G285500/Glyma.09G222800/Glyma.10G070100…	28
0 h	00071	Fatty acid degradation	31/3346	89/14423	0.00840133	0.0407712	0.0299119	Glyma.09G042000/Glyma.11G122500/Glyma.15G150900/Glyma.11G254100/Glyma.20G143900/Glyma.10G249700/Glyma.20G077000/Glyma.11G017900/Glyma.14G156400/Glyma.09G161600/Glyma.05G151200/Glyma.02G274100/Glyma.04G240800/Glyma.14G152100/Glyma.02G034000/Glyma.11G035200/Glyma.20G060300/Glyma.07G149400/Glyma.13G170600/Glyma.05G180100/Glyma.01G031500/Glyma.14G042000/Glyma.14G042800/Glyma.13G340000/Glyma.06G114300…	31
0 h	00941	Flavonoid biosynthesis	30/3346	86/14423	0.0092025	0.0433832	0.0318282	Glyma.14G005700/Glyma.06G202300/Glyma.18G103500/Glyma.18G104000/Glyma.03G122000/Glyma.08G110460/Glyma.14G205200/Glyma.07G214700/Glyma.05G021800/Glyma.19G126000/Glyma.20G114200/Glyma.02G236500/Glyma.07G021600/Glyma.17G171100/Glyma.13G371000/Glyma.17G252200/Glyma.08G220200/Glyma.02G069100/Glyma.01G187700/Glyma.02G103500/Glyma.05G021900/Glyma.08G109400/Glyma.11G054500/Glyma.08G311500/Glyma.08G062000…	30
4 h	09159	Environmental adaptation	207/3771	467/14423	4.88932e-18	8.06738e-16	5.66132e-16	Glyma.20G151900/Glyma.04G204400/Glyma.17G118700/Glyma.17G163700/Glyma.05G104200/Glyma.05G123200/Glyma.08G319300/Glyma.16G017400/Glyma.04G175300/Glyma.09G128800/Glyma.06G320700/Glyma.08G360600/Glyma.14G074300/Glyma.06G196200/Glyma.20G249600/Glyma.18G166800/Glyma.07G058200/Glyma.15G048600/Glyma.03G138000/Glyma.08G078200/Glyma.17G039800/Glyma.04G050200/Glyma.14G174200/Glyma.11G072100/Glyma.17G251000…	207
4 h	04626	Plant-pathogen interaction	169/3771	368/14423	1.04693e-16	8.63715e-15	6.06116e-15	Glyma.20G151900/Glyma.04G204400/Glyma.17G118700/Glyma.05G123200/Glyma.08G319300/Glyma.04G175300/Glyma.09G128800/Glyma.06G320700/Glyma.08G360600/Glyma.14G074300/Glyma.20G249600/Glyma.18G166800/Glyma.15G048600/Glyma.03G138000/Glyma.08G078200/Glyma.17G039800/Glyma.11G072100/Glyma.17G251000/Glyma.14G165700/Glyma.15G051600/Glyma.12G039400/Glyma.14G006800/Glyma.04G203200/Glyma.05G198700/Glyma.15G055100…	169
4 h	00194	Photosynthesis proteins	73/3771	142/14423	1.01308e-10	5.57195e-09	3.91014e-09	Glyma.15G130100/Glyma.14G008000/Glyma.07G047600/Glyma.12G202500/Glyma.12G199400/Glyma.02G309500/Glyma.15G016300/Glyma.18G241700/Glyma.16G205200/Glyma.11G245400/Glyma.03G262300/Glyma.04G112800/Glyma.06G277600/Glyma.10G177200/Glyma.03G114600/Glyma.06G067400/Glyma.20G144700/Glyma.15G179400/Glyma.16G016100/Glyma.05G172300/Glyma.08G304200/Glyma.06G020400/Glyma.06G321900/Glyma.14G003400/Glyma.18G028400…	73
4 h	00053	Ascorbate and aldarate metabolism	42/3771	74/14423	2.29641e-08	9.47268e-07	6.64749e-07	Glyma.08G243000/Glyma.01G057100/Glyma.13G057700/Glyma.02G292800/Glyma.06G183900/Glyma.U031121/Glyma.19G244600/Glyma.06G068200/Glyma.17G091000/Glyma.11G150243/Glyma.11G078400/Glyma.10G162000/Glyma.04G009800/Glyma.06G114400/Glyma.02G051500/Glyma.12G073100/Glyma.01G164700/Glyma.01G031500/Glyma.19G028500/Glyma.02G034000/Glyma.14G152100/Glyma.18G265100/Glyma.11G107200/Glyma.12G032300/Glyma.16G073100/G…	42
4 h	00195	Photosynthesis	55/3771	108/14423	3.06324e-08	1.01087e-06	7.09382e-07	Glyma.15G130100/Glyma.12G202500/Glyma.12G199400/Glyma.15G016300/Glyma.18G241700/Glyma.11G245400/Glyma.04G112800/Glyma.03G114600/Glyma.06G067400/Glyma.20G144700/Glyma.05G172300/Glyma.08G304200/Glyma.06G020400/Glyma.06G321900/Glyma.08G317100/Glyma.15G194300/Glyma.15G107900/Glyma.10G278900/Glyma.07G019700/Glyma.13G129400/Glyma.04G020300/Glyma.08G126800/Glyma.10G249000/Glyma.18G286500/Glyma.10G042100…	55
4 h	00630	Glyoxylate and dicarboxylate metabolism	57/3771	118/14423	1.83805e-07	5.05464e-06	3.54712e-06	Glyma.14G026400/Glyma.13G308700/Glyma.13G361400/Glyma.17G037900/Glyma.05G141400/Glyma.01G026700/Glyma.18G104400/Glyma.07G019900/Glyma.14G094700/Glyma.08G108900/Glyma.14G184500/Glyma.14G207700/Glyma.07G221300/Glyma.07G185400/Glyma.07G081900/Glyma.01G199700/Glyma.20G019600/Glyma.11G042200/Glyma.08G157700/Glyma.13G046200/Glyma.16G028700/Glyma.06G017900/Glyma.09G173200/Glyma.15G012500/Glyma.14G223500…	57
4 h	09106	Metabolism of other amino acids	138/3771	365/14423	4.9128e-07	1.12218e-05	7.87496e-06	Glyma.06G178400/Glyma.19G082300/Glyma.08G160500/Glyma.15G111500/Glyma.06G126700/Glyma.17G148000/Glyma.17G223900/Glyma.18G137100/Glyma.18G111200/Glyma.11G176400/Glyma.08G254500/Glyma.15G266700/Glyma.18G021100/Glyma.19G154100/Glyma.16G041200/Glyma.08G013900/Glyma.18G261600/Glyma.05G207100/Glyma.20G151500/Glyma.06G183900/Glyma.15G055500/Glyma.16G063200/Glyma.06G263100/Glyma.06G068200/Glyma.07G151500…	138
4 h	04016	MAPK signaling pathway - plant	87/3771	208/14423	5.44088e-07	1.12218e-05	7.87496e-06	Glyma.08G005100/Glyma.05G123200/Glyma.03G216700/Glyma.01G183500/Glyma.20G009600/Glyma.15G048600/Glyma.08G078200/Glyma.14G165700/Glyma.15G051600/Glyma.04G203200/Glyma.13G076700/Glyma.05G198700/Glyma.20G221800/Glyma.02G138800/Glyma.02G208500/Glyma.06G162300/Glyma.20G051500/Glyma.17G052500/Glyma.16G009300/Glyma.16G025900/Glyma.19G068300/Glyma.05G227100/Glyma.07G056900/Glyma.13G076800/Glyma.17G178800…	87
4 h	04031	GTP-binding proteins	74/3771	180/14423	7.84268e-06	0.000143782	0.0001009	Glyma.15G122300/Glyma.16G001700/Glyma.08G285600/Glyma.10G220100/Glyma.01G029800/Glyma.11G040400/Glyma.01G202500/Glyma.06G070700/Glyma.02G094100/Glyma.07G202900/Glyma.12G212400/Glyma.13G333500/Glyma.03G110200/Glyma.13G146600/Glyma.11G209354/Glyma.03G259200/Glyma.12G043900/Glyma.16G001800/Glyma.11G118800/Glyma.08G361000/Glyma.04G069300/Glyma.18G251300/Glyma.04G069200/Glyma.15G104200/Glyma.17G146100…	74
4 h	09191	Unclassified: metabolism	147/3771	415/14423	1.44236e-05	0.00023799	0.00016701	Glyma.07G066700/Glyma.19G007400/Glyma.08G059300/Glyma.06G175900/Glyma.11G220100/Glyma.13G258500/Glyma.08G149400/Glyma.04G166100/Glyma.14G023900/Glyma.13G096500/Glyma.17G123800/Glyma.05G138700/Glyma.01G013900/Glyma.13G212000/Glyma.18G244400/Glyma.18G097000/Glyma.08G319900/Glyma.05G042700/Glyma.13G113200/Glyma.12G024700/Glyma.16G151100/Glyma.10G187300/Glyma.15G100700/Glyma.09G008500/Glyma.08G286800…	147
4 h	99980	Enzymes with EC numbers	142/3771	402/14423	2.3514e-05	0.000352709	0.000247515	Glyma.19G007400/Glyma.08G059300/Glyma.06G175900/Glyma.11G220100/Glyma.13G258500/Glyma.08G149400/Glyma.04G166100/Glyma.14G023900/Glyma.13G096500/Glyma.17G123800/Glyma.05G138700/Glyma.01G013900/Glyma.13G212000/Glyma.18G244400/Glyma.18G097000/Glyma.05G042700/Glyma.13G113200/Glyma.12G024700/Glyma.16G151100/Glyma.15G100700/Glyma.09G008500/Glyma.08G286800/Glyma.08G283700/Glyma.05G006800/Glyma.07G222400…	142
4 h	00410	beta-Alanine metabolism	41/3771	89/14423	3.87044e-05	0.000532186	0.000373464	Glyma.06G178400/Glyma.15G111500/Glyma.06G183900/Glyma.15G055500/Glyma.07G151500/Glyma.09G168900/Glyma.09G227500/Glyma.17G091000/Glyma.05G180100/Glyma.08G307800/Glyma.16G080900/Glyma.18G109900/Glyma.02G051500/Glyma.01G031500/Glyma.02G034000/Glyma.14G152100/Glyma.18G043600/Glyma.14G036000/Glyma.16G218500/Glyma.08G303800/Glyma.20G145200/Glyma.02G038500/Glyma.18G116300/Glyma.14G211100/Glyma.14G209400…	41
4 h	00062	Fatty acid elongation	25/3771	46/14423	4.37327e-05	0.000555069	0.000389522	Glyma.17G118700/Glyma.14G074300/Glyma.11G245600/Glyma.09G260200/Glyma.17G251000/Glyma.18G011600/Glyma.18G232000/Glyma.01G207200/Glyma.07G071300/Glyma.03G260300/Glyma.08G279700/Glyma.08G261100/Glyma.04G149300/Glyma.18G011500/Glyma.18G146900/Glyma.10G179400/Glyma.20G115500/Glyma.11G144809/Glyma.15G042500/Glyma.04G057800/Glyma.20G210900/Glyma.10G291700/Glyma.10G274400/Glyma.10G001800/Glyma.02G001500	25
4 h	00520	Amino sugar and nucleotide sugar metabolism	96/3771	258/14423	5.31764e-05	0.000591609	0.000415165	Glyma.07G269900/Glyma.02G304500/Glyma.03G019700/Glyma.09G030300/Glyma.19G050100/Glyma.11G223700/Glyma.08G243000/Glyma.03G195900/Glyma.01G139500/Glyma.03G006900/Glyma.11G141200/Glyma.07G081600/Glyma.03G027300/Glyma.11G015800/Glyma.01G057100/Glyma.18G208900/Glyma.06G205900/Glyma.13G057700/Glyma.08G161900/Glyma.08G086700/Glyma.19G038000/Glyma.16G200600/Glyma.10G045800/Glyma.03G159200/Glyma.12G180300…	96
4 h	00903	Limonene and pinene degradation	13/3771	18/14423	5.65712e-05	0.000591609	0.000415165	Glyma.06G183900/Glyma.17G091000/Glyma.02G051500/Glyma.01G031500/Glyma.02G034000/Glyma.14G152100/Glyma.13G170600/Glyma.13G340000/Glyma.06G114300/Glyma.16G131700/Glyma.04G248500/Glyma.12G057400/Glyma.15G034400	13
4 h	00940	Phenylpropanoid biosynthesis	116/3771	323/14423	5.73682e-05	0.000591609	0.000415165	Glyma.19G013400/Glyma.15G003600/Glyma.07G260300/Glyma.15G059500/Glyma.10G209800/Glyma.11G176400/Glyma.12G241800/Glyma.10G262400/Glyma.15G090300/Glyma.09G156700/Glyma.06G263100/Glyma.06G137100/Glyma.20G128600/Glyma.15G001700/Glyma.04G227700/Glyma.03G070300/Glyma.20G169200/Glyma.20G180800/Glyma.01G232400/Glyma.07G258700/Glyma.01G192500/Glyma.09G189300/Glyma.09G002500/Glyma.10G058200/Glyma.12G054500…	116
4 h	00710	Carbon fixation in photosynthetic organisms	49/3771	116/14423	0.000114722	0.00111348	0.000781386	Glyma.10G197700/Glyma.07G045900/Glyma.10G205500/Glyma.03G246300/Glyma.13G270400/Glyma.19G088400/Glyma.10G268500/Glyma.12G161300/Glyma.16G013900/Glyma.16G059000/Glyma.05G025300/Glyma.01G010200/Glyma.20G192200/Glyma.01G026700/Glyma.19G243800/Glyma.16G044900/Glyma.20G243500/Glyma.07G142700/Glyma.03G191500/Glyma.07G074700/Glyma.19G106800/Glyma.07G185400/Glyma.10G059500/Glyma.08G067500/Glyma.07G253700…	49
4 h	00592	alpha-Linolenic acid metabolism	42/3771	98/14423	0.000234999	0.00215416	0.00151169	Glyma.20G077000/Glyma.10G124700/Glyma.01G002400/Glyma.07G151500/Glyma.20G009100/Glyma.17G050000/Glyma.05G180100/Glyma.11G122700/Glyma.12G191400/Glyma.02G099200/Glyma.07G039900/Glyma.14G156400/Glyma.18G280900/Glyma.16G008700/Glyma.04G240800/Glyma.17G246500/Glyma.13G239000/Glyma.14G223200/Glyma.01G235600/Glyma.14G223600/Glyma.07G162900/Glyma.12G054700/Glyma.19G263300/Glyma.17G209900/Glyma.11G035200…	42
4 h	00908	Zeatin biosynthesis	24/3771	48/14423	0.000338577	0.0028512	0.00200084	Glyma.04G055600/Glyma.10G062200/Glyma.08G365000/Glyma.02G184200/Glyma.20G116500/Glyma.18G297200/Glyma.19G187100/Glyma.12G011400/Glyma.19G135100/Glyma.14G099000/Glyma.03G186900/Glyma.15G170300/Glyma.09G063900/Glyma.07G256700/Glyma.03G134500/Glyma.03G187700/Glyma.03G151800/Glyma.03G187000/Glyma.02G148600/Glyma.09G225400/Glyma.10G025300/Glyma.13G104700/Glyma.15G103800/Glyma.19G187000	24
4 h	04146	Peroxisome	56/3771	142/14423	0.0003456	0.0028512	0.00200084	Glyma.11G254100/Glyma.17G089700/Glyma.15G109800/Glyma.08G160500/Glyma.15G111500/Glyma.03G250100/Glyma.13G229400/Glyma.07G219300/Glyma.20G077000/Glyma.17G009400/Glyma.10G124700/Glyma.15G266700/Glyma.15G213100/Glyma.20G004600/Glyma.08G203400/Glyma.05G141400/Glyma.10G183500/Glyma.19G236200/Glyma.13G346400/Glyma.15G083100/Glyma.03G119400/Glyma.07G151500/Glyma.20G009100/Glyma.14G207700/Glyma.04G076300…	56
4 h	00480	Glutathione metabolism	56/3771	144/14423	0.000521257	0.00409559	0.0028741	Glyma.19G082300/Glyma.08G160500/Glyma.06G126700/Glyma.17G223900/Glyma.18G137100/Glyma.18G111200/Glyma.08G254500/Glyma.15G266700/Glyma.18G021100/Glyma.19G154100/Glyma.08G013900/Glyma.05G207100/Glyma.16G063200/Glyma.06G068200/Glyma.01G106000/Glyma.17G092400/Glyma.18G190500/Glyma.19G177200/Glyma.14G211000/Glyma.11G150243/Glyma.11G078400/Glyma.15G251900/Glyma.02G241200/Glyma.07G140000/Glyma.10G192900…	56
4 h	00650	Butanoate metabolism	19/3771	36/14423	0.000587117	0.00440338	0.00309009	Glyma.11G096200/Glyma.17G132300/Glyma.01G215500/Glyma.09G168900/Glyma.16G200200/Glyma.11G027000/Glyma.16G028700/Glyma.06G254700/Glyma.07G235400/Glyma.07G059800/Glyma.20G043000/Glyma.18G043600/Glyma.16G218500/Glyma.14G211100/Glyma.14G036600/Glyma.08G091400/Glyma.02G277900/Glyma.11G213000/Glyma.05G136100	19
4 h	00190	Oxidative phosphorylation	80/3771	224/14423	0.000913735	0.00655506	0.00460004	Glyma.09G129000/Glyma.20G079400/Glyma.09G245700/Glyma.03G214500/Glyma.14G177100/Glyma.11G091800/Glyma.01G145000/Glyma.09G056300/Glyma.02G050200/Glyma.08G322900/Glyma.14G127600/Glyma.14G126300/Glyma.12G099000/Glyma.16G066200/Glyma.12G017800/Glyma.05G074400/Glyma.04G007500/Glyma.17G069400/Glyma.08G090500/Glyma.13G132400/Glyma.01G228400/Glyma.14G017500/Glyma.16G130300/Glyma.07G091500/Glyma.03G105300…	80
4 h	00260	Glycine, serine and threonine metabolism	47/3771	119/14423	0.000955856	0.00657151	0.00461159	Glyma.04G162700/Glyma.06G178400/Glyma.13G361400/Glyma.17G037900/Glyma.01G026700/Glyma.09G270500/Glyma.16G147300/Glyma.17G057700/Glyma.07G019900/Glyma.14G094700/Glyma.08G108900/Glyma.14G184500/Glyma.07G221300/Glyma.04G076300/Glyma.07G081900/Glyma.01G199700/Glyma.20G019600/Glyma.13G049500/Glyma.11G042200/Glyma.15G012500/Glyma.17G012000/Glyma.18G150000/Glyma.01G129400/Glyma.02G038100/Glyma.06G186300…	47
4 h	09109	Metabolism of terpenoids and polyketides	105/3771	309/14423	0.0012257	0.00808961	0.00567692	Glyma.02G273100/Glyma.11G253000/Glyma.06G049500/Glyma.17G174500/Glyma.09G015600/Glyma.18G118100/Glyma.17G132300/Glyma.03G128900/Glyma.16G113000/Glyma.16G141700/Glyma.20G227900/Glyma.15G243100/Glyma.06G183900/Glyma.09G198800/Glyma.13G262200/Glyma.02G059000/Glyma.19G236200/Glyma.08G093400/Glyma.01G215500/Glyma.11G252500/Glyma.20G243500/Glyma.10G086700/Glyma.06G038700/Glyma.05G050500/Glyma.16G200200…	105
4 h	00430	Taurine and hypotaurine metabolism	9/3771	13/14423	0.00139712	0.00886632	0.00622198	Glyma.18G021100/Glyma.09G168900/Glyma.18G043600/Glyma.16G218500/Glyma.07G126200/Glyma.14G211100/Glyma.08G091400/Glyma.11G213000/Glyma.05G136100	9
4 h	00196	Photosynthesis - antenna proteins	17/3771	33/14423	0.0016107	0.00984315	0.00690748	Glyma.14G008000/Glyma.07G047600/Glyma.02G309500/Glyma.16G205200/Glyma.03G262300/Glyma.10G177200/Glyma.15G179400/Glyma.16G016100/Glyma.14G003400/Glyma.18G028400/Glyma.06G194900/Glyma.02G064700/Glyma.04G167900/Glyma.11G228800/Glyma.17G262400/Glyma.09G071400/Glyma.06G039700	17
4 h	00591	Linoleic acid metabolism	21/3771	45/14423	0.00238114	0.0140317	0.0098468	Glyma.01G002400/Glyma.07G039900/Glyma.16G008700/Glyma.13G239000/Glyma.12G054700/Glyma.19G263300/Glyma.U039300/Glyma.07G034800/Glyma.11G130200/Glyma.13G030300/Glyma.20G144600/Glyma.07G034900/Glyma.15G026400/Glyma.10G249100/Glyma.07G007000/Glyma.15G026500/Glyma.07G196800/Glyma.07G006900/Glyma.11G130300/Glyma.03G264300/Glyma.13G347700	21
4 h	00280	Valine, leucine and isoleucine degradation	36/3771	91/14423	0.00344753	0.0196153	0.0137651	Glyma.05G063900/Glyma.17G037900/Glyma.20G077000/Glyma.17G132300/Glyma.10G028700/Glyma.10G124700/Glyma.06G183900/Glyma.01G215500/Glyma.20G009100/Glyma.16G200200/Glyma.06G120300/Glyma.01G196300/Glyma.11G154423/Glyma.11G027000/Glyma.01G103100/Glyma.17G091000/Glyma.08G307800/Glyma.16G080900/Glyma.07G235400/Glyma.18G109900/Glyma.02G051500/Glyma.01G129400/Glyma.01G031500/Glyma.02G034000/Glyma.20G043000…	36
4 h	00945	Stilbenoid, diarylheptanoid and gingerol biosynthesis	18/3771	38/14423	0.0039094	0.0215017	0.0150889	Glyma.18G103500/Glyma.10G060700/Glyma.03G122000/Glyma.02G236500/Glyma.20G114200/Glyma.07G021600/Glyma.18G104000/Glyma.19G126000/Glyma.14G205200/Glyma.07G214700/Glyma.08G311500/Glyma.08G220200/Glyma.13G371000/Glyma.01G187700/Glyma.02G103500/Glyma.17G171100/Glyma.11G054500/Glyma.18G113100	18
4 h	04040	Ion channels	35/3771	89/14423	0.00435913	0.0232018	0.016282	Glyma.12G204400/Glyma.13G096000/Glyma.11G048200/Glyma.14G161600/Glyma.07G056400/Glyma.09G168400/Glyma.06G126600/Glyma.01G193700/Glyma.18G263900/Glyma.12G099500/Glyma.06G077600/Glyma.09G168700/Glyma.01G157900/Glyma.02G299700/Glyma.16G208400/Glyma.13G296900/Glyma.05G077100/Glyma.19G221000/Glyma.07G022500/Glyma.08G241600/Glyma.14G014100/Glyma.03G257000/Glyma.19G089800/Glyma.16G025400/Glyma.19G255300…	35
4 h	04712	Circadian rhythm - plant	38/3771	99/14423	0.00495597	0.0255542	0.0179328	Glyma.17G163700/Glyma.05G104200/Glyma.16G017400/Glyma.06G196200/Glyma.07G058200/Glyma.04G050200/Glyma.14G174200/Glyma.05G025000/Glyma.01G192100/Glyma.11G050000/Glyma.06G103200/Glyma.04G228300/Glyma.13G089200/Glyma.06G136600/Glyma.20G209900/Glyma.19G260900/Glyma.16G027200/Glyma.03G261800/Glyma.11G011500/Glyma.05G067100/Glyma.16G018000/Glyma.08G197500/Glyma.17G149300/Glyma.08G110500/Glyma.03G225000…	38
4 h	01008	Polyketide biosynthesis proteins	11/3771	20/14423	0.0056906	0.028453	0.019967	Glyma.11G011500/Glyma.08G110500/Glyma.08G109400/Glyma.08G109500/Glyma.08G110300/Glyma.09G075200/Glyma.01G091400/Glyma.08G109200/Glyma.08G110460/Glyma.02G130400/Glyma.06G118550	11
4 h	00072	Synthesis and degradation of ketone bodies	8/3771	13/14423	0.00755425	0.0366603	0.0257265	Glyma.17G132300/Glyma.01G215500/Glyma.16G200200/Glyma.11G027000/Glyma.07G235400/Glyma.20G043000/Glyma.14G036600/Glyma.02G277900	8
4 h	00330	Arginine and proline metabolism	42/3771	115/14423	0.00892661	0.0420826	0.0295317	Glyma.04G007700/Glyma.01G071300/Glyma.20G248500/Glyma.06G126700/Glyma.17G131300/Glyma.18G137100/Glyma.04G020800/Glyma.05G104400/Glyma.06G183900/Glyma.13G066500/Glyma.07G253200/Glyma.03G129100/Glyma.10G297300/Glyma.08G106000/Glyma.09G227500/Glyma.17G092400/Glyma.17G091000/Glyma.06G007500/Glyma.08G255800/Glyma.02G128000/Glyma.17G021200/Glyma.18G278900/Glyma.02G051500/Glyma.05G029200/Glyma.01G031500…	42
8 h	01001	Protein kinases	195/3571	454/14423	5.40507e-18	5.74689e-16	4.26371e-16	Glyma.02G138800/Glyma.04G207900/Glyma.01G166400/Glyma.16G158700/Glyma.06G108900/Glyma.08G005100/Glyma.19G007300/Glyma.10G038400/Glyma.10G094500/Glyma.03G245500/Glyma.01G157800/Glyma.17G083100/Glyma.01G082700/Glyma.07G066800/Glyma.02G048300/Glyma.14G164400/Glyma.15G102500/Glyma.03G243500/Glyma.01G241300/Glyma.05G202000/Glyma.11G050000/Glyma.17G188300/Glyma.04G123500/Glyma.08G050900/Glyma.11G123500…	195
8 h	09159	Environmental adaptation	199/3571	467/14423	6.92397e-18	5.74689e-16	4.26371e-16	Glyma.02G138800/Glyma.06G108900/Glyma.01G171000/Glyma.04G157200/Glyma.02G048300/Glyma.06G223800/Glyma.01G224200/Glyma.05G212500/Glyma.11G050000/Glyma.11G148362/Glyma.07G051600/Glyma.08G317700/Glyma.07G003200/Glyma.04G204400/Glyma.04G166300/Glyma.17G039800/Glyma.13G106900/Glyma.06G196200/Glyma.08G360600/Glyma.03G084000/Glyma.04G050200/Glyma.15G051600/Glyma.08G180800/Glyma.06G103200/Glyma.17G052400…	199
8 h	04626	Plant-pathogen interaction	161/3571	368/14423	6.23103e-16	3.44784e-14	2.558e-14	Glyma.02G138800/Glyma.06G108900/Glyma.01G171000/Glyma.04G157200/Glyma.02G048300/Glyma.06G223800/Glyma.05G212500/Glyma.07G051600/Glyma.08G317700/Glyma.07G003200/Glyma.04G204400/Glyma.17G039800/Glyma.13G106900/Glyma.08G360600/Glyma.03G084000/Glyma.15G051600/Glyma.08G180800/Glyma.17G052400/Glyma.14G006800/Glyma.08G316500/Glyma.16G099600/Glyma.05G245600/Glyma.06G320700/Glyma.08G078200/Glyma.05G011100…	161
8 h	01003	Glycosyltransferases	131/3571	320/14423	9.31947e-11	3.86758e-09	2.86942e-09	Glyma.01G016400/Glyma.20G244900/Glyma.01G048500/Glyma.18G085100/Glyma.13G050600/Glyma.11G243000/Glyma.06G240600/Glyma.18G136200/Glyma.05G086900/Glyma.17G110300/Glyma.13G202500/Glyma.13G370500/Glyma.10G128800/Glyma.18G085200/Glyma.08G324800/Glyma.13G058100/Glyma.08G309900/Glyma.19G028100/Glyma.15G245800/Glyma.02G100600/Glyma.12G201500/Glyma.05G024800/Glyma.01G113000/Glyma.02G081000/Glyma.05G018500…	131
8 h	99980	Enzymes with EC numbers	155/3571	402/14423	3.82214e-10	1.26895e-08	9.41454e-09	Glyma.01G142300/Glyma.03G175200/Glyma.15G167500/Glyma.08G210900/Glyma.12G205800/Glyma.15G061100/Glyma.08G059300/Glyma.19G239400/Glyma.08G139100/Glyma.13G253800/Glyma.09G015400/Glyma.04G095500/Glyma.17G125500/Glyma.10G022700/Glyma.18G097000/Glyma.12G049500/Glyma.09G008500/Glyma.03G242000/Glyma.04G093600/Glyma.18G003200/Glyma.19G136400/Glyma.19G115400/Glyma.02G227700/Glyma.08G324700/Glyma.13G348200…	155
8 h	09191	Unclassified: metabolism	157/3571	415/14423	1.46269e-09	4.04677e-08	3.00236e-08	Glyma.01G142300/Glyma.03G175200/Glyma.15G167500/Glyma.08G210900/Glyma.12G205800/Glyma.15G061100/Glyma.08G059300/Glyma.19G239400/Glyma.07G066700/Glyma.08G139100/Glyma.13G253800/Glyma.09G015400/Glyma.04G095500/Glyma.17G125500/Glyma.10G022700/Glyma.18G097000/Glyma.12G049500/Glyma.09G008500/Glyma.03G242000/Glyma.04G093600/Glyma.18G003200/Glyma.19G136400/Glyma.19G115400/Glyma.02G227700/Glyma.08G324700…	157
8 h	04016	MAPK signaling pathway - plant	88/3571	208/14423	1.78603e-08	4.23544e-07	3.14234e-07	Glyma.02G138800/Glyma.02G250200/Glyma.06G108900/Glyma.08G005100/Glyma.03G181400/Glyma.09G052000/Glyma.05G212500/Glyma.10G058300/Glyma.07G056900/Glyma.19G191600/Glyma.14G066400/Glyma.20G009600/Glyma.03G216700/Glyma.07G003200/Glyma.12G241700/Glyma.14G223500/Glyma.02G165800/Glyma.15G051600/Glyma.08G180800/Glyma.13G076700/Glyma.14G145920/Glyma.14G108400/Glyma.08G078200/Glyma.04G017500/Glyma.03G191000…	88
8 h	00520	Amino sugar and nucleotide sugar metabolism	96/3571	258/14423	5.05571e-06	0.000104906	7.78313e-05	Glyma.11G141200/Glyma.05G132100/Glyma.13G133800/Glyma.01G167500/Glyma.13G050600/Glyma.03G006900/Glyma.09G030300/Glyma.05G222000/Glyma.13G058100/Glyma.08G309900/Glyma.19G028100/Glyma.12G201500/Glyma.08G243000/Glyma.19G124500/Glyma.18G229800/Glyma.05G018500/Glyma.19G257700/Glyma.11G141300/Glyma.03G259000/Glyma.11G015800/Glyma.08G161900/Glyma.05G152300/Glyma.12G180300/Glyma.10G045800/Glyma.11G127200…	96
8 h	00561	Glycerolipid metabolism	51/3571	117/14423	6.12786e-06	0.000113025	8.38549e-05	Glyma.06G183900/Glyma.05G022500/Glyma.01G113000/Glyma.06G039200/Glyma.17G077100/Glyma.09G263300/Glyma.06G220300/Glyma.13G134500/Glyma.09G207900/Glyma.19G175600/Glyma.09G160400/Glyma.13G085700/Glyma.18G197600/Glyma.12G045700/Glyma.03G174900/Glyma.10G046400/Glyma.15G012500/Glyma.14G077500/Glyma.01G113200/Glyma.03G008300/Glyma.13G093100/Glyma.19G132900/Glyma.17G248200/Glyma.05G196100/Glyma.13G101400…	51
8 h	00630	Glyoxylate and dicarboxylate metabolism	50/3571	118/14423	1.93406e-05	0.000316105	0.000234523	Glyma.14G207700/Glyma.08G311200/Glyma.08G108900/Glyma.15G016100/Glyma.13G097100/Glyma.14G026400/Glyma.14G223500/Glyma.05G141400/Glyma.13G308700/Glyma.04G017500/Glyma.19G046600/Glyma.12G098900/Glyma.14G094700/Glyma.15G250800/Glyma.12G193800/Glyma.16G028700/Glyma.08G157700/Glyma.17G012000/Glyma.15G012500/Glyma.06G017900/Glyma.19G046800/Glyma.09G247900/Glyma.09G015500/Glyma.02G038100/Glyma.03G128300…	50
8 h	00053	Ascorbate and aldarate metabolism	35/3571	74/14423	2.09467e-05	0.000316105	0.000234523	Glyma.06G183900/Glyma.08G243000/Glyma.19G061200/Glyma.18G092900/Glyma.11G150243/Glyma.06G068200/Glyma.04G009800/Glyma.05G224500/Glyma.02G292800/Glyma.10G162000/Glyma.06G114400/Glyma.07G266200/Glyma.12G032300/Glyma.16G073100/Glyma.13G076900/Glyma.20G224400/Glyma.13G057700/Glyma.05G022600/Glyma.11G107200/Glyma.14G152100/Glyma.18G265100/Glyma.19G028500/Glyma.05G002500/Glyma.13G170600/Glyma.02G034000…	35
8 h	00410	beta-Alanine metabolism	40/3571	89/14423	2.52027e-05	0.000321819	0.000238763	Glyma.09G168900/Glyma.06G183900/Glyma.08G276400/Glyma.09G007100/Glyma.14G032300/Glyma.02G282000/Glyma.03G117300/Glyma.08G282800/Glyma.15G055500/Glyma.08G307800/Glyma.15G111500/Glyma.05G180100/Glyma.16G218500/Glyma.16G080900/Glyma.09G227500/Glyma.01G062400/Glyma.18G109900/Glyma.14G152100/Glyma.11G035200/Glyma.02G278600/Glyma.18G116300/Glyma.18G043600/Glyma.08G303800/Glyma.14G211100/Glyma.13G170600…	40
8 h	04040	Ion channels	40/3571	89/14423	2.52027e-05	0.000321819	0.000238763	Glyma.06G016000/Glyma.04G157200/Glyma.06G223800/Glyma.12G194100/Glyma.13G308500/Glyma.01G193700/Glyma.13G141000/Glyma.09G168400/Glyma.05G029700/Glyma.14G161600/Glyma.16G218200/Glyma.18G263900/Glyma.16G111700/Glyma.13G308400/Glyma.05G077100/Glyma.13G161800/Glyma.12G204400/Glyma.10G053900/Glyma.07G056400/Glyma.06G126600/Glyma.19G221000/Glyma.02G299700/Glyma.06G077600/Glyma.12G099500/Glyma.19G089800…	40
8 h	01009	Protein phosphatases and associated proteins	152/3571	460/14423	3.01891e-05	0.000357957	0.000265573	Glyma.06G060800/Glyma.02G170500/Glyma.03G185200/Glyma.03G245500/Glyma.08G195200/Glyma.17G221100/Glyma.08G194900/Glyma.15G129300/Glyma.20G218400/Glyma.09G083800/Glyma.15G139500/Glyma.09G195800/Glyma.15G143000/Glyma.07G012000/Glyma.18G199400/Glyma.04G101400/Glyma.11G023700/Glyma.17G223800/Glyma.07G239000/Glyma.18G279500/Glyma.01G219800/Glyma.04G185200/Glyma.13G002100/Glyma.13G274800/Glyma.01G038800…	152
8 h	00591	Linoleic acid metabolism	24/3571	45/14423	3.58636e-05	0.000396891	0.000294459	Glyma.08G102900/Glyma.19G132900/Glyma.07G039900/Glyma.02G190000/Glyma.03G130900/Glyma.16G008700/Glyma.13G239000/Glyma.19G263300/Glyma.12G054700/Glyma.07G034800/Glyma.11G130200/Glyma.13G030300/Glyma.U039300/Glyma.20G144600/Glyma.10G249100/Glyma.15G026400/Glyma.07G007000/Glyma.15G026500/Glyma.07G196800/Glyma.03G264300/Glyma.07G034900/Glyma.13G347700/Glyma.11G130300/Glyma.07G006900	24
8 h	00903	Limonene and pinene degradation	12/3571	18/14423	0.000207335	0.0021511	0.00159593	Glyma.06G183900/Glyma.14G152100/Glyma.13G170600/Glyma.02G034000/Glyma.01G031500/Glyma.02G051500/Glyma.04G248500/Glyma.13G340000/Glyma.16G131700/Glyma.12G057400/Glyma.06G114300/Glyma.15G034400	12
8 h	00280	Valine, leucine and isoleucine degradation	38/3571	91/14423	0.000264787	0.00258557	0.00191827	Glyma.07G213500/Glyma.10G124700/Glyma.01G196300/Glyma.06G183900/Glyma.08G276400/Glyma.08G204300/Glyma.20G077000/Glyma.09G042000/Glyma.16G200200/Glyma.03G117300/Glyma.17G132300/Glyma.10G028700/Glyma.11G154423/Glyma.08G307800/Glyma.06G120300/Glyma.07G019100/Glyma.15G150900/Glyma.01G103100/Glyma.16G080900/Glyma.03G070200/Glyma.18G109900/Glyma.14G152100/Glyma.07G235400/Glyma.20G043000/Glyma.01G129400…	38
8 h	04146	Peroxisome	53/3571	142/14423	0.000565481	0.00521499	0.00386908	Glyma.03G250100/Glyma.03G018700/Glyma.10G124700/Glyma.08G203400/Glyma.14G207700/Glyma.11G254100/Glyma.19G236200/Glyma.15G266700/Glyma.15G083100/Glyma.05G005300/Glyma.09G007100/Glyma.12G221000/Glyma.20G004600/Glyma.07G080200/Glyma.15G034000/Glyma.20G077000/Glyma.17G089700/Glyma.11G017900/Glyma.14G223500/Glyma.10G249700/Glyma.11G122500/Glyma.02G241200/Glyma.13G340300/Glyma.05G141400/Glyma.15G111500…	53
8 h	00071	Fatty acid degradation	36/3571	89/14423	0.00077753	0.00671016	0.00497837	Glyma.10G124700/Glyma.06G183900/Glyma.11G254100/Glyma.14G156400/Glyma.12G015400/Glyma.20G077000/Glyma.11G017900/Glyma.09G042000/Glyma.10G249700/Glyma.11G122500/Glyma.15G150900/Glyma.04G240800/Glyma.20G143900/Glyma.09G161600/Glyma.05G180100/Glyma.05G151200/Glyma.14G152100/Glyma.11G035200/Glyma.14G042000/Glyma.12G015300/Glyma.20G060300/Glyma.11G175900/Glyma.07G149400/Glyma.13G170600/Glyma.07G161900…	36
8 h	00500	Starch and sucrose metabolism	80/3571	235/14423	0.000817361	0.00671016	0.00497837	Glyma.03G192300/Glyma.07G258600/Glyma.08G025500/Glyma.18G136200/Glyma.08G028400/Glyma.16G217900/Glyma.08G334000/Glyma.02G033500/Glyma.10G270800/Glyma.11G015800/Glyma.20G120300/Glyma.08G244900/Glyma.05G219200/Glyma.11G127200/Glyma.19G113600/Glyma.15G029800/Glyma.04G180900/Glyma.13G088300/Glyma.06G184200/Glyma.20G153600/Glyma.13G161600/Glyma.06G129400/Glyma.12G005200/Glyma.06G323700/Glyma.14G218800…	80
8 h	09106	Metabolism of other amino acids	117/3571	365/14423	0.00087147	0.00671016	0.00497837	Glyma.09G168900/Glyma.07G258600/Glyma.06G183900/Glyma.08G108900/Glyma.08G276400/Glyma.15G266700/Glyma.02G185300/Glyma.05G005300/Glyma.11G088200/Glyma.09G007100/Glyma.16G038300/Glyma.07G013800/Glyma.16G113100/Glyma.14G032300/Glyma.02G282000/Glyma.01G156600/Glyma.03G117300/Glyma.08G282800/Glyma.19G154100/Glyma.20G151500/Glyma.15G055500/Glyma.12G163700/Glyma.02G241200/Glyma.11G180900/Glyma.08G307800…	117
8 h	00564	Glycerophospholipid metabolism	61/3571	171/14423	0.000889298	0.00671016	0.00497837	Glyma.05G022500/Glyma.01G162100/Glyma.06G216800/Glyma.07G080800/Glyma.05G020500/Glyma.19G233400/Glyma.06G169100/Glyma.06G039200/Glyma.17G077100/Glyma.09G195000/Glyma.06G220300/Glyma.04G033600/Glyma.02G078500/Glyma.13G134500/Glyma.09G207900/Glyma.19G175600/Glyma.11G178400/Glyma.16G110900/Glyma.04G148300/Glyma.15G152100/Glyma.13G085700/Glyma.10G183200/Glyma.05G168300/Glyma.12G045700/Glyma.03G174900…	61
8 h	00592	alpha-Linolenic acid metabolism	38/3571	98/14423	0.00144637	0.010439	0.00774485	Glyma.10G124700/Glyma.11G122700/Glyma.14G156400/Glyma.20G077000/Glyma.08G102900/Glyma.17G050000/Glyma.07G162900/Glyma.04G240800/Glyma.05G180100/Glyma.19G132900/Glyma.07G039900/Glyma.17G246500/Glyma.01G235600/Glyma.11G035200/Glyma.14G223200/Glyma.12G191400/Glyma.02G190000/Glyma.19G044900/Glyma.13G047300/Glyma.03G130900/Glyma.16G008700/Glyma.13G239000/Glyma.17G209900/Glyma.14G223600/Glyma.02G054200…	38
8 h	00062	Fatty acid elongation	21/3571	46/14423	0.00160996	0.0106901	0.00793118	Glyma.09G260200/Glyma.18G232000/Glyma.11G245600/Glyma.05G011100/Glyma.03G260300/Glyma.06G058500/Glyma.01G207200/Glyma.08G279700/Glyma.18G011500/Glyma.18G146900/Glyma.20G115500/Glyma.04G057800/Glyma.12G075100/Glyma.08G261100/Glyma.11G144809/Glyma.20G210900/Glyma.10G274400/Glyma.10G179400/Glyma.10G291700/Glyma.02G001500/Glyma.10G001800	21
8 h	00565	Ether lipid metabolism	21/3571	46/14423	0.00160996	0.0106901	0.00793118	Glyma.01G162100/Glyma.07G080800/Glyma.06G169100/Glyma.04G033600/Glyma.11G178400/Glyma.15G152100/Glyma.05G168300/Glyma.06G033800/Glyma.01G215100/Glyma.02G093500/Glyma.06G061500/Glyma.19G132900/Glyma.20G238000/Glyma.02G190000/Glyma.03G130900/Glyma.06G020500/Glyma.16G081200/Glyma.18G288600/Glyma.18G265800/Glyma.13G364900/Glyma.03G092800	21
8 h	04712	Circadian rhythm - plant	38/3571	99/14423	0.00179548	0.0114635	0.00850491	Glyma.01G224200/Glyma.11G050000/Glyma.11G148362/Glyma.04G166300/Glyma.06G196200/Glyma.04G050200/Glyma.06G103200/Glyma.11G018700/Glyma.20G170000/Glyma.17G102200/Glyma.05G025000/Glyma.06G136600/Glyma.01G192100/Glyma.05G067100/Glyma.16G163200/Glyma.20G209900/Glyma.10G221500/Glyma.07G058200/Glyma.16G017400/Glyma.08G109400/Glyma.03G261800/Glyma.19G260900/Glyma.07G048500/Glyma.17G149300/Glyma.19G222000…	38
8 h	01004	Lipid biosynthesis proteins	54/3571	152/14423	0.00188494	0.0115889	0.00859798	Glyma.03G021000/Glyma.03G015500/Glyma.11G254100/Glyma.09G260200/Glyma.18G232000/Glyma.07G075500/Glyma.07G080800/Glyma.18G246900/Glyma.11G245600/Glyma.19G233400/Glyma.11G017900/Glyma.03G056700/Glyma.10G249700/Glyma.09G195000/Glyma.06G220300/Glyma.11G122500/Glyma.04G033600/Glyma.17G120400/Glyma.09G207900/Glyma.19G147400/Glyma.20G143900/Glyma.16G110900/Glyma.13G085700/Glyma.04G151600/Glyma.16G042000…	54
8 h	00945	Stilbenoid, diarylheptanoid and gingerol biosynthesis	18/3571	38/14423	0.00204785	0.0121408	0.00900745	Glyma.18G103500/Glyma.20G114200/Glyma.14G205200/Glyma.03G122000/Glyma.19G126000/Glyma.07G214700/Glyma.02G236500/Glyma.02G069100/Glyma.18G104000/Glyma.07G021600/Glyma.17G171100/Glyma.08G220200/Glyma.13G371000/Glyma.02G103500/Glyma.11G054500/Glyma.01G187700/Glyma.08G311500/Glyma.18G113100	18
8 h	00910	Nitrogen metabolism	25/3571	60/14423	0.00292357	0.0167349	0.0124159	Glyma.02G132100/Glyma.08G196200/Glyma.07G012500/Glyma.10G005200/Glyma.04G236900/Glyma.01G030500/Glyma.13G257200/Glyma.16G041200/Glyma.03G128300/Glyma.19G130800/Glyma.02G244000/Glyma.17G161900/Glyma.18G041100/Glyma.15G057700/Glyma.11G215500/Glyma.03G133600/Glyma.02G213700/Glyma.13G210800/Glyma.15G102000/Glyma.18G138400/Glyma.18G141900/Glyma.13G084000/Glyma.05G007100/Glyma.19G007700/Glyma.06G109200	25
8 h	00199	Cytochrome P450	35/3571	92/14423	0.00316596	0.0171682	0.0127374	Glyma.13G147500/Glyma.11G122700/Glyma.14G059900/Glyma.09G252800/Glyma.11G228900/Glyma.19G162100/Glyma.07G162900/Glyma.06G202300/Glyma.08G365000/Glyma.20G114200/Glyma.05G208900/Glyma.14G205200/Glyma.03G122000/Glyma.18G239900/Glyma.17G246500/Glyma.19G126000/Glyma.17G118100/Glyma.02G236500/Glyma.12G191400/Glyma.18G297200/Glyma.13G217400/Glyma.11G074100/Glyma.11G175900/Glyma.04G030100/Glyma.16G149300…	35
8 h	00330	Arginine and proline metabolism	42/3571	115/14423	0.00320612	0.0171682	0.0127374	Glyma.20G248500/Glyma.05G141900/Glyma.06G183900/Glyma.05G104400/Glyma.08G106000/Glyma.14G032300/Glyma.02G282000/Glyma.03G129100/Glyma.17G163900/Glyma.17G021200/Glyma.17G092400/Glyma.18G137100/Glyma.02G128000/Glyma.10G297300/Glyma.18G278800/Glyma.20G132000/Glyma.08G288100/Glyma.09G227500/Glyma.10G259100/Glyma.06G007500/Glyma.14G152100/Glyma.05G029200/Glyma.18G116300/Glyma.08G255800/Glyma.18G188000…	42
8 h	09108	Metabolism of cofactors and vitamins	137/3571	453/14423	0.00409985	0.021268	0.015779	Glyma.01G227400/Glyma.06G084100/Glyma.10G048200/Glyma.01G196300/Glyma.06G051100/Glyma.02G301700/Glyma.19G115900/Glyma.06G183900/Glyma.08G194900/Glyma.13G234000/Glyma.08G108900/Glyma.01G238400/Glyma.15G025600/Glyma.18G099900/Glyma.12G020100/Glyma.08G188200/Glyma.14G012500/Glyma.08G157800/Glyma.07G188200/Glyma.14G032300/Glyma.02G282000/Glyma.04G093600/Glyma.04G069600/Glyma.13G154600/Glyma.10G128400…	137
8 h	00130	Ubiquinone and other terpenoid-quinone biosynthesis	30/3571	78/14423	0.00500206	0.0251619	0.018668	Glyma.06G084100/Glyma.07G188200/Glyma.01G177600/Glyma.15G130500/Glyma.01G232400/Glyma.12G216900/Glyma.03G206500/Glyma.20G114200/Glyma.13G284200/Glyma.14G205200/Glyma.09G024500/Glyma.15G064700/Glyma.02G236500/Glyma.02G002000/Glyma.17G262200/Glyma.18G139700/Glyma.17G064600/Glyma.15G001700/Glyma.08G285500/Glyma.13G095600/Glyma.11G010500/Glyma.13G249600/Glyma.08G061200/Glyma.12G014300/Glyma.13G152780…	30
8 h	04070	Phosphatidylinositol signaling system	41/3571	115/14423	0.00579036	0.0282706	0.0209744	Glyma.06G152800/Glyma.05G169400/Glyma.05G022500/Glyma.08G156400/Glyma.08G186400/Glyma.10G060000/Glyma.17G077100/Glyma.07G216600/Glyma.04G088000/Glyma.06G109400/Glyma.07G045600/Glyma.13G065500/Glyma.04G213400/Glyma.14G059200/Glyma.04G253100/Glyma.04G009800/Glyma.20G013500/Glyma.20G173200/Glyma.10G183200/Glyma.18G027200/Glyma.14G059400/Glyma.18G255000/Glyma.05G197200/Glyma.07G266200/Glyma.13G093100…	41
8 h	00906	Carotenoid biosynthesis	21/3571	51/14423	0.00718691	0.0331396	0.0245868	Glyma.13G147500/Glyma.19G251000/Glyma.09G252800/Glyma.02G240200/Glyma.10G231200/Glyma.15G172200/Glyma.20G227900/Glyma.10G086700/Glyma.02G272200/Glyma.11G151700/Glyma.18G239900/Glyma.09G066200/Glyma.01G154900/Glyma.14G209700/Glyma.14G045100/Glyma.08G306200/Glyma.19G160300/Glyma.09G000600/Glyma.11G161947/Glyma.02G104300/Glyma.08G176300	21
8 h	99997	Function unknown	21/3571	51/14423	0.00718691	0.0331396	0.0245868	Glyma.17G054200/Glyma.07G271000/Glyma.10G177000/Glyma.05G213000/Glyma.13G107800/Glyma.13G111600/Glyma.11G082000/Glyma.06G293500/Glyma.12G191200/Glyma.20G213200/Glyma.17G051500/Glyma.01G161700/Glyma.11G131700/Glyma.12G036900/Glyma.20G164100/Glyma.13G113900/Glyma.20G247000/Glyma.17G045900/Glyma.10G229000/Glyma.11G110000/Glyma.07G273000	21
8 h	00562	Inositol phosphate metabolism	38/3571	107/14423	0.00825375	0.0370303	0.0274734	Glyma.06G152800/Glyma.05G169400/Glyma.08G156400/Glyma.08G276400/Glyma.08G186400/Glyma.10G060000/Glyma.06G169100/Glyma.07G216600/Glyma.04G088000/Glyma.06G109400/Glyma.07G045600/Glyma.04G213400/Glyma.11G178400/Glyma.14G059200/Glyma.04G253100/Glyma.04G009800/Glyma.20G013500/Glyma.20G173200/Glyma.05G224500/Glyma.18G027200/Glyma.14G059400/Glyma.05G197200/Glyma.07G266200/Glyma.02G257200/Glyma.08G127700…	38
12 h	09159	Environmental adaptation	189/3377	467/14423	5.97266e-17	9.91462e-15	7.41867e-15	Glyma.06G108900/Glyma.17G231600/Glyma.08G316500/Glyma.02G048300/Glyma.04G157200/Glyma.11G148362/Glyma.17G039800/Glyma.07G003200/Glyma.08G180800/Glyma.06G103200/Glyma.13G106900/Glyma.07G238700/Glyma.05G011100/Glyma.04G166300/Glyma.06G320700/Glyma.09G254800/Glyma.11G018700/Glyma.19G140800/Glyma.06G196200/Glyma.01G192100/Glyma.20G054500/Glyma.05G198700/Glyma.04G203200/Glyma.15G051600/Glyma.11G072100…	189
12 h	04626	Plant-pathogen interaction	154/3377	368/14423	1.63974e-15	1.36098e-13	1.01836e-13	Glyma.06G108900/Glyma.08G316500/Glyma.02G048300/Glyma.04G157200/Glyma.17G039800/Glyma.07G003200/Glyma.08G180800/Glyma.13G106900/Glyma.07G238700/Glyma.05G011100/Glyma.06G320700/Glyma.09G254800/Glyma.19G140800/Glyma.20G054500/Glyma.05G198700/Glyma.04G203200/Glyma.15G051600/Glyma.11G072100/Glyma.14G006800/Glyma.08G078200/Glyma.05G245600/Glyma.14G216300/Glyma.08G360600/Glyma.14G165700/Glyma.17G052400…	154
12 h	01001	Protein kinases	174/3377	454/14423	3.69529e-13	2.04473e-11	1.52998e-11	Glyma.11G002600/Glyma.05G244600/Glyma.10G005600/Glyma.10G038400/Glyma.05G016900/Glyma.20G208900/Glyma.20G219600/Glyma.10G181500/Glyma.17G229100/Glyma.17G178800/Glyma.14G028100/Glyma.17G053500/Glyma.02G180100/Glyma.06G108900/Glyma.04G029700/Glyma.16G088700/Glyma.03G069800/Glyma.14G164400/Glyma.17G188300/Glyma.20G229800/Glyma.07G125200/Glyma.08G316500/Glyma.17G083100/Glyma.05G157200/Glyma.02G048300…	174
12 h	04016	MAPK signaling pathway - plant	90/3377	208/14423	1.55859e-10	5.34549e-09	3.99979e-09	Glyma.10G058300/Glyma.17G178800/Glyma.06G108900/Glyma.02G250200/Glyma.03G216700/Glyma.14G223500/Glyma.16G009300/Glyma.07G003200/Glyma.08G180800/Glyma.07G238700/Glyma.04G017500/Glyma.03G191000/Glyma.09G254800/Glyma.13G151100/Glyma.02G165800/Glyma.14G066400/Glyma.05G198700/Glyma.04G203200/Glyma.15G051600/Glyma.08G078200/Glyma.13G145100/Glyma.13G229300/Glyma.20G221800/Glyma.13G076700/Glyma.14G165700…	90
12 h	99980	Enzymes with EC numbers	150/3377	402/14423	1.61009e-10	5.34549e-09	3.99979e-09	Glyma.07G174800/Glyma.10G022700/Glyma.12G205800/Glyma.04G093600/Glyma.19G061900/Glyma.04G045400/Glyma.06G175900/Glyma.19G136400/Glyma.04G095500/Glyma.08G236000/Glyma.03G069700/Glyma.08G286800/Glyma.08G210900/Glyma.03G242000/Glyma.05G015400/Glyma.13G348200/Glyma.09G015400/Glyma.18G097000/Glyma.17G125500/Glyma.20G019100/Glyma.14G182100/Glyma.08G059300/Glyma.07G189900/Glyma.01G013900/Glyma.12G107000…	150
12 h	09191	Unclassified: metabolism	152/3377	415/14423	5.73058e-10	1.58546e-08	1.18633e-08	Glyma.07G066700/Glyma.07G174800/Glyma.10G022700/Glyma.12G205800/Glyma.04G093600/Glyma.19G061900/Glyma.04G045400/Glyma.06G175900/Glyma.19G136400/Glyma.04G095500/Glyma.08G236000/Glyma.03G069700/Glyma.08G286800/Glyma.08G210900/Glyma.03G242000/Glyma.05G015400/Glyma.13G348200/Glyma.09G015400/Glyma.18G097000/Glyma.17G125500/Glyma.20G019100/Glyma.14G182100/Glyma.08G059300/Glyma.07G189900/Glyma.01G013900…	152
12 h	01003	Glycosyltransferases	121/3377	320/14423	3.84514e-09	9.11848e-08	6.82296e-08	Glyma.13G370500/Glyma.18G085100/Glyma.12G113302/Glyma.07G046500/Glyma.11G243000/Glyma.09G263300/Glyma.18G085200/Glyma.06G240600/Glyma.13G058100/Glyma.13G261000/Glyma.05G086900/Glyma.19G028100/Glyma.06G292500/Glyma.08G308700/Glyma.10G128800/Glyma.06G129400/Glyma.15G245800/Glyma.07G119300/Glyma.12G201500/Glyma.04G153700/Glyma.01G113000/Glyma.02G081000/Glyma.08G127200/Glyma.08G324800/Glyma.08G145600…	121
12 h	00410	beta-Alanine metabolism	41/3377	89/14423	2.16179e-06	4.48572e-05	3.35647e-05	Glyma.08G276400/Glyma.08G282800/Glyma.02G282000/Glyma.03G117300/Glyma.09G007100/Glyma.06G178400/Glyma.14G032300/Glyma.05G180100/Glyma.15G111500/Glyma.08G307800/Glyma.09G227500/Glyma.16G218500/Glyma.16G080900/Glyma.02G278600/Glyma.14G152100/Glyma.11G035200/Glyma.18G109900/Glyma.01G062400/Glyma.18G043600/Glyma.14G211100/Glyma.02G051500/Glyma.18G116300/Glyma.01G031500/Glyma.02G038500/Glyma.10G090700…	41
12 h	01009	Protein phosphatases and associated proteins	150/3377	460/14423	3.15209e-06	5.46019e-05	4.08562e-05	Glyma.09G195800/Glyma.20G003400/Glyma.15G139500/Glyma.06G078100/Glyma.17G097500/Glyma.09G142100/Glyma.19G077700/Glyma.03G185200/Glyma.11G023700/Glyma.03G146900/Glyma.08G195200/Glyma.08G029600/Glyma.01G219800/Glyma.09G023200/Glyma.07G148100/Glyma.08G194000/Glyma.14G017800/Glyma.13G348300/Glyma.17G120300/Glyma.02G170500/Glyma.13G145700/Glyma.15G143000/Glyma.01G038800/Glyma.15G072000/Glyma.04G101400…	150
12 h	00591	Linoleic acid metabolism	25/3377	45/14423	3.28927e-06	5.46019e-05	4.08562e-05	Glyma.08G102900/Glyma.07G039900/Glyma.02G190000/Glyma.08G189600/Glyma.19G132900/Glyma.16G008700/Glyma.13G239000/Glyma.03G130900/Glyma.12G054700/Glyma.13G030300/Glyma.19G263300/Glyma.11G130200/Glyma.07G034800/Glyma.U039300/Glyma.20G144600/Glyma.10G249100/Glyma.15G026400/Glyma.07G007000/Glyma.07G034900/Glyma.03G264300/Glyma.15G026500/Glyma.11G130300/Glyma.07G006900/Glyma.13G347700/Glyma.07G196800	25
12 h	04040	Ion channels	40/3377	89/14423	6.10122e-06	9.20729e-05	6.88941e-05	Glyma.06G016000/Glyma.12G194100/Glyma.13G308500/Glyma.04G157200/Glyma.01G193700/Glyma.13G308400/Glyma.16G111700/Glyma.16G218200/Glyma.18G263900/Glyma.13G161800/Glyma.14G161600/Glyma.09G168700/Glyma.07G056400/Glyma.05G029700/Glyma.12G204400/Glyma.05G077100/Glyma.06G126600/Glyma.10G053900/Glyma.02G299700/Glyma.14G014100/Glyma.13G296900/Glyma.19G221000/Glyma.19G089800/Glyma.01G157900/Glyma.16G208400…	40
12 h	00561	Glycerolipid metabolism	47/3377	117/14423	3.79179e-05	0.000524531	0.000392484	Glyma.17G077100/Glyma.09G263300/Glyma.01G113000/Glyma.06G039200/Glyma.13G101400/Glyma.09G160400/Glyma.15G012500/Glyma.09G207900/Glyma.02G190000/Glyma.13G134500/Glyma.12G045700/Glyma.18G197600/Glyma.03G008300/Glyma.19G175600/Glyma.14G077500/Glyma.10G046400/Glyma.13G093100/Glyma.17G248200/Glyma.14G152100/Glyma.05G196100/Glyma.19G132900/Glyma.06G299200/Glyma.12G200100/Glyma.03G174900/Glyma.02G051500…	47
12 h	00053	Ascorbate and aldarate metabolism	32/3377	74/14423	0.00012508	0.00159717	0.00119509	Glyma.13G057700/Glyma.18G092900/Glyma.11G150243/Glyma.19G061200/Glyma.06G068200/Glyma.04G009800/Glyma.06G114400/Glyma.13G076900/Glyma.12G032300/Glyma.02G292800/Glyma.05G022600/Glyma.10G162000/Glyma.11G107200/Glyma.05G224500/Glyma.14G152100/Glyma.18G265100/Glyma.19G028500/Glyma.20G224400/Glyma.16G073100/Glyma.02G051500/Glyma.01G031500/Glyma.13G170600/Glyma.02G034000/Glyma.05G002500/Glyma.04G248500…	32
12 h	04070	Phosphatidylinositol signaling system	44/3377	115/14423	0.000247234	0.00293149	0.00219351	Glyma.08G156400/Glyma.17G077100/Glyma.10G060000/Glyma.04G213400/Glyma.07G238700/Glyma.07G216600/Glyma.06G109400/Glyma.04G253100/Glyma.20G013500/Glyma.04G088000/Glyma.14G059200/Glyma.18G027200/Glyma.08G186400/Glyma.02G257200/Glyma.13G065500/Glyma.04G009800/Glyma.18G255000/Glyma.09G241100/Glyma.10G183200/Glyma.04G030000/Glyma.08G127700/Glyma.07G107000/Glyma.08G241500/Glyma.20G173200/Glyma.13G093100…	44
12 h	00520	Amino sugar and nucleotide sugar metabolism	85/3377	258/14423	0.000279475	0.00309285	0.00231425	Glyma.09G030300/Glyma.12G180300/Glyma.11G141300/Glyma.13G058100/Glyma.01G167500/Glyma.19G028100/Glyma.03G259000/Glyma.12G201500/Glyma.13G057700/Glyma.08G309900/Glyma.08G161900/Glyma.10G045800/Glyma.10G018400/Glyma.03G159200/Glyma.19G038000/Glyma.18G229800/Glyma.04G159700/Glyma.04G159200/Glyma.18G264700/Glyma.11G015800/Glyma.09G017000/Glyma.14G218800/Glyma.07G081600/Glyma.11G127200/Glyma.11G075700…	85
12 h	00564	Glycerophospholipid metabolism	60/3377	171/14423	0.00034712	0.00360137	0.00269475	Glyma.07G080800/Glyma.17G077100/Glyma.08G181200/Glyma.01G162100/Glyma.06G169100/Glyma.06G216800/Glyma.04G033600/Glyma.11G178400/Glyma.06G039200/Glyma.02G078500/Glyma.19G233400/Glyma.16G110900/Glyma.06G033800/Glyma.02G093500/Glyma.09G195000/Glyma.15G152100/Glyma.10G183200/Glyma.09G207900/Glyma.02G190000/Glyma.13G134500/Glyma.12G045700/Glyma.04G148300/Glyma.03G008300/Glyma.19G175600/Glyma.14G077500…	60
12 h	00630	Glyoxylate and dicarboxylate metabolism	44/3377	118/14423	0.000476325	0.00465118	0.00348027	Glyma.13G308700/Glyma.14G223500/Glyma.04G017500/Glyma.12G098900/Glyma.13G097100/Glyma.14G094700/Glyma.17G012000/Glyma.12G193800/Glyma.09G173200/Glyma.07G081900/Glyma.02G038100/Glyma.06G017900/Glyma.19G046600/Glyma.09G247900/Glyma.03G128300/Glyma.15G012500/Glyma.05G141400/Glyma.19G130800/Glyma.19G046800/Glyma.02G244000/Glyma.16G028700/Glyma.18G150000/Glyma.08G157700/Glyma.07G059800/Glyma.18G244900…	44
12 h	00903	Limonene and pinene degradation	11/3377	18/14423	0.000682368	0.00629295	0.00470874	Glyma.14G152100/Glyma.02G051500/Glyma.01G031500/Glyma.13G170600/Glyma.02G034000/Glyma.04G248500/Glyma.13G340000/Glyma.16G131700/Glyma.12G057400/Glyma.06G114300/Glyma.15G034400	11
12 h	99997	Function unknown	22/3377	51/14423	0.00142737	0.0124707	0.0093313	Glyma.07G271000/Glyma.17G054200/Glyma.13G113900/Glyma.13G107800/Glyma.13G111600/Glyma.05G213000/Glyma.03G066000/Glyma.01G161700/Glyma.10G177000/Glyma.11G082000/Glyma.11G131700/Glyma.17G051500/Glyma.20G213200/Glyma.12G191200/Glyma.17G002900/Glyma.17G045900/Glyma.20G247000/Glyma.20G164100/Glyma.11G110000/Glyma.12G036900/Glyma.10G229000/Glyma.07G273000	22
12 h	00562	Inositol phosphate metabolism	39/3377	107/14423	0.00159222	0.0131453	0.00983609	Glyma.08G156400/Glyma.10G060000/Glyma.06G169100/Glyma.08G276400/Glyma.04G213400/Glyma.11G178400/Glyma.07G216600/Glyma.06G109400/Glyma.04G253100/Glyma.13G146200/Glyma.20G013500/Glyma.04G088000/Glyma.14G059200/Glyma.18G027200/Glyma.08G186400/Glyma.02G257200/Glyma.04G009800/Glyma.04G030000/Glyma.08G127700/Glyma.07G107000/Glyma.08G241500/Glyma.20G173200/Glyma.11G230000/Glyma.05G224500/Glyma.14G059400…	39
12 h	09106	Metabolism of other amino acids	110/3377	365/14423	0.00166297	0.0131453	0.00983609	Glyma.07G258600/Glyma.11G180900/Glyma.01G156600/Glyma.16G000200/Glyma.05G005300/Glyma.08G276400/Glyma.16G113100/Glyma.19G114500/Glyma.11G088200/Glyma.08G282800/Glyma.02G282000/Glyma.03G117300/Glyma.18G137100/Glyma.02G185300/Glyma.14G086300/Glyma.09G007100/Glyma.06G178400/Glyma.14G032300/Glyma.12G163700/Glyma.05G180100/Glyma.14G211000/Glyma.05G161500/Glyma.11G150243/Glyma.15G111500/Glyma.08G307800…	110
12 h	00565	Ether lipid metabolism	20/3377	46/14423	0.00206429	0.015576	0.0116548	Glyma.07G080800/Glyma.01G162100/Glyma.06G169100/Glyma.04G033600/Glyma.11G178400/Glyma.06G033800/Glyma.02G093500/Glyma.15G152100/Glyma.02G190000/Glyma.01G215100/Glyma.05G168300/Glyma.19G132900/Glyma.20G238000/Glyma.06G061500/Glyma.18G288600/Glyma.03G130900/Glyma.06G020500/Glyma.16G081200/Glyma.13G364900/Glyma.03G092800	20
12 h	00071	Fatty acid degradation	33/3377	89/14423	0.00255298	0.0184258	0.0137873	Glyma.20G077000/Glyma.09G042000/Glyma.11G122500/Glyma.02G274100/Glyma.05G180100/Glyma.20G143900/Glyma.11G017900/Glyma.10G249700/Glyma.11G254100/Glyma.15G150900/Glyma.09G161600/Glyma.05G151200/Glyma.12G015400/Glyma.14G152100/Glyma.11G035200/Glyma.20G060300/Glyma.02G051500/Glyma.01G031500/Glyma.14G042000/Glyma.12G015300/Glyma.13G170600/Glyma.11G175900/Glyma.02G034000/Glyma.14G042200/Glyma.07G161900…	33
12 h	09194	Poorly characterized	25/3377	63/14423	0.00286119	0.0194223	0.0145329	Glyma.07G271000/Glyma.17G054200/Glyma.13G113900/Glyma.13G107800/Glyma.13G111600/Glyma.05G213000/Glyma.03G066000/Glyma.01G161700/Glyma.10G177000/Glyma.11G082000/Glyma.11G131700/Glyma.17G051500/Glyma.20G213200/Glyma.17G069700/Glyma.12G191200/Glyma.20G144800/Glyma.17G002900/Glyma.01G093200/Glyma.17G045900/Glyma.20G247000/Glyma.20G164100/Glyma.11G110000/Glyma.12G036900/Glyma.10G229000/Glyma.07G273000	25
12 h	00945	Stilbenoid, diarylheptanoid and gingerol biosynthesis	17/3377	38/14423	0.00303921	0.0194223	0.0145329	Glyma.03G122000/Glyma.20G114200/Glyma.19G126000/Glyma.14G205200/Glyma.02G236500/Glyma.07G214700/Glyma.07G021600/Glyma.18G104000/Glyma.08G220200/Glyma.02G103500/Glyma.01G187700/Glyma.02G069100/Glyma.17G171100/Glyma.13G371000/Glyma.08G311500/Glyma.11G054500/Glyma.18G113100	17
12 h	00910	Nitrogen metabolism	24/3377	60/14423	0.00304205	0.0194223	0.0145329	Glyma.08G196200/Glyma.04G236900/Glyma.07G012500/Glyma.09G173200/Glyma.10G005200/Glyma.16G041200/Glyma.03G128300/Glyma.19G130800/Glyma.02G244000/Glyma.13G257200/Glyma.17G161900/Glyma.18G041100/Glyma.11G215500/Glyma.15G057700/Glyma.13G210800/Glyma.18G141900/Glyma.02G213700/Glyma.03G133600/Glyma.15G102000/Glyma.18G138400/Glyma.13G084000/Glyma.05G007100/Glyma.06G109200/Glyma.19G007700	24
12 h	00330	Arginine and proline metabolism	40/3377	115/14423	0.00372056	0.0228745	0.017116	Glyma.01G071300/Glyma.04G007700/Glyma.20G248500/Glyma.08G106000/Glyma.02G282000/Glyma.18G137100/Glyma.17G163900/Glyma.14G032300/Glyma.05G104400/Glyma.17G021200/Glyma.10G297300/Glyma.09G227500/Glyma.17G092400/Glyma.02G128000/Glyma.10G259100/Glyma.18G278800/Glyma.14G152100/Glyma.08G288100/Glyma.06G007500/Glyma.02G051500/Glyma.18G116300/Glyma.05G029200/Glyma.08G255800/Glyma.01G099800/Glyma.03G028000…	40
12 h	00592	alpha-Linolenic acid metabolism	35/3377	98/14423	0.00394961	0.0234155	0.0175208	Glyma.20G077000/Glyma.05G180100/Glyma.17G050000/Glyma.07G162900/Glyma.08G102900/Glyma.07G039900/Glyma.02G190000/Glyma.17G246500/Glyma.12G191400/Glyma.14G223200/Glyma.11G035200/Glyma.19G132900/Glyma.13G047300/Glyma.16G008700/Glyma.14G223600/Glyma.13G239000/Glyma.19G044900/Glyma.01G235600/Glyma.03G130900/Glyma.12G054700/Glyma.17G209900/Glyma.13G109700/Glyma.17G049900/Glyma.13G030300/Glyma.19G263300…	35
12 h	04712	Circadian rhythm - plant	35/3377	99/14423	0.00475908	0.0272416	0.0203837	Glyma.17G231600/Glyma.11G148362/Glyma.06G103200/Glyma.04G166300/Glyma.11G018700/Glyma.06G196200/Glyma.01G192100/Glyma.20G209900/Glyma.20G170000/Glyma.04G050200/Glyma.17G102200/Glyma.07G058200/Glyma.10G221500/Glyma.16G163200/Glyma.06G136600/Glyma.16G017400/Glyma.03G261800/Glyma.19G260900/Glyma.05G025000/Glyma.05G067100/Glyma.07G048500/Glyma.13G089200/Glyma.14G174200/Glyma.03G225000/Glyma.04G228300…	35
12 h	00062	Fatty acid elongation	19/3377	46/14423	0.00526994	0.0291603	0.0218194	Glyma.18G232000/Glyma.11G245600/Glyma.05G011100/Glyma.03G260300/Glyma.01G207200/Glyma.08G279700/Glyma.18G011500/Glyma.06G058500/Glyma.20G115500/Glyma.18G146900/Glyma.08G261100/Glyma.04G057800/Glyma.11G144809/Glyma.10G001800/Glyma.02G001500/Glyma.10G179400/Glyma.10G274400/Glyma.20G210900/Glyma.10G291700	19
12 h	00500	Starch and sucrose metabolism	72/3377	235/14423	0.00628641	0.0336627	0.0251884	Glyma.08G334000/Glyma.08G028400/Glyma.07G258600/Glyma.08G244900/Glyma.11G111500/Glyma.06G129400/Glyma.16G217900/Glyma.05G219200/Glyma.12G005200/Glyma.13G161600/Glyma.11G015800/Glyma.14G218800/Glyma.15G182600/Glyma.06G184200/Glyma.11G127200/Glyma.15G029800/Glyma.20G153600/Glyma.17G109700/Glyma.05G056300/Glyma.02G033500/Glyma.14G222600/Glyma.08G028900/Glyma.06G323700/Glyma.02G018700/Glyma.08G137500…	72
12 h	00360	Phenylalanine metabolism	18/3377	44/14423	0.00734643	0.0371183	0.027774	Glyma.08G106000/Glyma.08G282800/Glyma.06G178400/Glyma.05G181000/Glyma.06G254700/Glyma.10G058200/Glyma.01G062400/Glyma.19G182300/Glyma.20G180800/Glyma.10G209800/Glyma.02G038500/Glyma.13G145000/Glyma.20G145200/Glyma.02G309300/Glyma.03G181600/Glyma.20G145300/Glyma.03G181700/Glyma.02G120600	18
12 h	00280	Valine, leucine and isoleucine degradation	32/3377	91/14423	0.00737894	0.0371183	0.027774	Glyma.20G077000/Glyma.09G042000/Glyma.07G019100/Glyma.08G276400/Glyma.11G154423/Glyma.03G117300/Glyma.16G200200/Glyma.17G132300/Glyma.10G028700/Glyma.08G204300/Glyma.08G307800/Glyma.15G150900/Glyma.06G120300/Glyma.03G070200/Glyma.07G235400/Glyma.16G080900/Glyma.01G129400/Glyma.14G152100/Glyma.18G109900/Glyma.20G043000/Glyma.02G051500/Glyma.01G031500/Glyma.14G036600/Glyma.13G170600/Glyma.02G277900…	32
12 h	00199	Cytochrome P450	32/3377	92/14423	0.00882629	0.043093	0.0322446	Glyma.03G122000/Glyma.11G228900/Glyma.13G147500/Glyma.20G114200/Glyma.19G126000/Glyma.14G059900/Glyma.07G162900/Glyma.14G205200/Glyma.05G208900/Glyma.08G365000/Glyma.02G236500/Glyma.05G021800/Glyma.17G246500/Glyma.18G239900/Glyma.12G191400/Glyma.17G118100/Glyma.11G074100/Glyma.18G297200/Glyma.13G217400/Glyma.02G051600/Glyma.16G149300/Glyma.11G175900/Glyma.05G021900/Glyma.04G035000/Glyma.16G089900…	32
16 h	09159	Environmental adaptation	193/3321	467/14423	2.79291e-19	4.66416e-17	3.41029e-17	Glyma.19G140800/Glyma.04G101500/Glyma.09G056100/Glyma.06G108900/Glyma.05G213200/Glyma.04G157200/Glyma.08G360600/Glyma.02G008500/Glyma.10G141400/Glyma.05G011100/Glyma.17G231600/Glyma.06G223800/Glyma.10G009100/Glyma.02G204300/Glyma.14G165700/Glyma.08G259000/Glyma.11G050000/Glyma.08G180800/Glyma.01G192100/Glyma.04G188700/Glyma.17G039800/Glyma.20G170000/Glyma.02G138800/Glyma.10G221500/Glyma.11G018700…	193
16 h	04626	Plant-pathogen interaction	155/3321	368/14423	1.37573e-16	1.14873e-14	8.39917e-15	Glyma.19G140800/Glyma.06G108900/Glyma.05G213200/Glyma.04G157200/Glyma.08G360600/Glyma.02G008500/Glyma.05G011100/Glyma.06G223800/Glyma.10G009100/Glyma.02G204300/Glyma.14G165700/Glyma.08G259000/Glyma.08G180800/Glyma.04G188700/Glyma.17G039800/Glyma.02G138800/Glyma.14G006800/Glyma.06G189600/Glyma.06G320700/Glyma.05G245600/Glyma.13G141000/Glyma.13G106900/Glyma.07G101100/Glyma.15G051600/Glyma.14G216300…	155
16 h	01001	Protein kinases	169/3321	454/14423	3.17234e-12	1.76594e-10	1.2912e-10	Glyma.19G140800/Glyma.10G009900/Glyma.06G108900/Glyma.05G213200/Glyma.13G105900/Glyma.13G274500/Glyma.08G360600/Glyma.05G145800/Glyma.17G188300/Glyma.02G008500/Glyma.16G158700/Glyma.14G094400/Glyma.17G229100/Glyma.03G069800/Glyma.03G191000/Glyma.10G124200/Glyma.05G195300/Glyma.03G243500/Glyma.15G171100/Glyma.09G079000/Glyma.10G009100/Glyma.10G212000/Glyma.20G179100/Glyma.11G058800/Glyma.11G087200…	169
16 h	09191	Unclassified: metabolism	153/3321	415/14423	7.94575e-11	3.00855e-09	2.19976e-09	Glyma.03G069700/Glyma.04G095500/Glyma.07G189900/Glyma.08G210900/Glyma.13G163400/Glyma.17G107500/Glyma.15G121200/Glyma.17G052700/Glyma.08G315900/Glyma.03G242000/Glyma.18G092500/Glyma.04G189600/Glyma.18G003200/Glyma.04G093600/Glyma.17G125500/Glyma.13G253800/Glyma.19G061900/Glyma.10G022700/Glyma.19G239400/Glyma.19G013800/Glyma.05G042700/Glyma.10G187300/Glyma.06G175900/Glyma.13G348200/Glyma.08G299900…	153
16 h	99980	Enzymes with EC numbers	149/3321	402/14423	9.00764e-11	3.00855e-09	2.19976e-09	Glyma.03G069700/Glyma.04G095500/Glyma.07G189900/Glyma.08G210900/Glyma.13G163400/Glyma.17G107500/Glyma.15G121200/Glyma.08G315900/Glyma.03G242000/Glyma.04G189600/Glyma.18G003200/Glyma.04G093600/Glyma.17G125500/Glyma.13G253800/Glyma.19G061900/Glyma.10G022700/Glyma.19G239400/Glyma.19G013800/Glyma.05G042700/Glyma.06G175900/Glyma.13G348200/Glyma.08G299900/Glyma.09G008500/Glyma.07G228300/Glyma.20G031600…	149
16 h	04016	MAPK signaling pathway - plant	87/3321	208/14423	1.01175e-09	2.81603e-08	2.05899e-08	Glyma.06G108900/Glyma.13G342500/Glyma.14G066400/Glyma.03G191000/Glyma.11G058800/Glyma.03G181400/Glyma.14G165700/Glyma.08G180800/Glyma.02G138800/Glyma.15G031800/Glyma.14G108400/Glyma.16G009300/Glyma.16G025900/Glyma.13G151100/Glyma.13G145100/Glyma.15G051600/Glyma.02G165800/Glyma.08G078200/Glyma.17G178800/Glyma.04G203200/Glyma.01G204200/Glyma.20G221800/Glyma.05G198700/Glyma.14G145920/Glyma.20G009600…	87
16 h	00053	Ascorbate and aldarate metabolism	37/3321	74/14423	3.55919e-07	8.43099e-06	6.16448e-06	Glyma.13G030400/Glyma.U031121/Glyma.18G092900/Glyma.17G091000/Glyma.13G076900/Glyma.13G057700/Glyma.04G009800/Glyma.06G068200/Glyma.19G061200/Glyma.02G051500/Glyma.02G292800/Glyma.19G028500/Glyma.06G183900/Glyma.18G265100/Glyma.07G013900/Glyma.20G224400/Glyma.06G114400/Glyma.10G162000/Glyma.07G266200/Glyma.12G032300/Glyma.14G152100/Glyma.05G022600/Glyma.11G107200/Glyma.16G073100/Glyma.05G224500/G…	37
16 h	00410	beta-Alanine metabolism	42/3321	89/14423	4.54365e-07	8.43099e-06	6.16448e-06	Glyma.13G030400/Glyma.02G282000/Glyma.09G168900/Glyma.08G276400/Glyma.12G120300/Glyma.03G117300/Glyma.15G055500/Glyma.09G007100/Glyma.08G307800/Glyma.15G111500/Glyma.17G091000/Glyma.18G116300/Glyma.08G282800/Glyma.16G080900/Glyma.09G227500/Glyma.02G051500/Glyma.06G183900/Glyma.18G109900/Glyma.16G218500/Glyma.14G152100/Glyma.14G211100/Glyma.11G035200/Glyma.05G180100/Glyma.08G303800/Glyma.01G062400…	42
16 h	04040	Ion channels	42/3321	89/14423	4.54365e-07	8.43099e-06	6.16448e-06	Glyma.04G157200/Glyma.01G193700/Glyma.06G223800/Glyma.02G204300/Glyma.06G016000/Glyma.13G141000/Glyma.13G308400/Glyma.16G218200/Glyma.16G111700/Glyma.13G308500/Glyma.12G194100/Glyma.14G014100/Glyma.09G168700/Glyma.12G099500/Glyma.18G263900/Glyma.13G161800/Glyma.06G077600/Glyma.14G161600/Glyma.13G324600/Glyma.05G077100/Glyma.12G204400/Glyma.06G126600/Glyma.03G223900/Glyma.07G056400/Glyma.19G221000…	42
16 h	00903	Limonene and pinene degradation	14/3321	18/14423	1.34771e-06	2.25068e-05	1.64563e-05	Glyma.13G030400/Glyma.17G091000/Glyma.02G051500/Glyma.06G183900/Glyma.14G152100/Glyma.01G031500/Glyma.13G170600/Glyma.02G034000/Glyma.13G340000/Glyma.04G248500/Glyma.16G131700/Glyma.06G114300/Glyma.12G057400/Glyma.15G034400	14
16 h	00280	Valine, leucine and isoleucine degradation	41/3321	91/14423	2.77701e-06	4.21601e-05	3.08261e-05	Glyma.01G196300/Glyma.19G128600/Glyma.13G030400/Glyma.08G276400/Glyma.09G042000/Glyma.03G117300/Glyma.01G103100/Glyma.08G307800/Glyma.07G019100/Glyma.10G124700/Glyma.17G091000/Glyma.16G200200/Glyma.20G077000/Glyma.07G213500/Glyma.15G150900/Glyma.10G028700/Glyma.02G145300/Glyma.16G080900/Glyma.17G132300/Glyma.11G154423/Glyma.02G051500/Glyma.07G235400/Glyma.03G070200/Glyma.06G183900/Glyma.18G109900…	41
16 h	00630	Glyoxylate and dicarboxylate metabolism	49/3321	118/14423	5.54121e-06	7.71151e-05	5.63842e-05	Glyma.14G207700/Glyma.19G107300/Glyma.13G097100/Glyma.14G184500/Glyma.12G193800/Glyma.05G141400/Glyma.07G081900/Glyma.01G026700/Glyma.15G012500/Glyma.14G223500/Glyma.09G015500/Glyma.14G026400/Glyma.07G185400/Glyma.12G098900/Glyma.08G157700/Glyma.19G130800/Glyma.04G017500/Glyma.19G046600/Glyma.03G128300/Glyma.17G012000/Glyma.02G244000/Glyma.16G028700/Glyma.09G173200/Glyma.06G017900/Glyma.18G041100…	49
16 h	00591	Linoleic acid metabolism	24/3321	45/14423	9.76663e-06	0.000125464	9.17351e-05	Glyma.07G039900/Glyma.08G102900/Glyma.13G239000/Glyma.16G008700/Glyma.02G190000/Glyma.19G132900/Glyma.19G263300/Glyma.20G144600/Glyma.10G249100/Glyma.03G130900/Glyma.07G034800/Glyma.12G054700/Glyma.U039300/Glyma.11G130200/Glyma.15G026400/Glyma.07G007000/Glyma.07G034900/Glyma.13G030300/Glyma.15G026500/Glyma.07G196800/Glyma.03G264300/Glyma.11G130300/Glyma.07G006900/Glyma.13G347700	24
16 h	01003	Glycosyltransferases	107/3321	320/14423	1.1474e-05	0.000136869	0.000100074	Glyma.02G080900/Glyma.06G240600/Glyma.07G081600/Glyma.12G237000/Glyma.05G187300/Glyma.02G081000/Glyma.12G201500/Glyma.10G032400/Glyma.20G167900/Glyma.08G127200/Glyma.18G136200/Glyma.12G113302/Glyma.10G224000/Glyma.16G165900/Glyma.10G062200/Glyma.03G202100/Glyma.06G129400/Glyma.09G103000/Glyma.19G254500/Glyma.18G264700/Glyma.08G309900/Glyma.19G038000/Glyma.09G263300/Glyma.08G242500/Glyma.08G324800…	107
16 h	00561	Glycerolipid metabolism	47/3321	117/14423	2.41274e-05	0.000268618	0.000196406	Glyma.13G030400/Glyma.17G077100/Glyma.06G039200/Glyma.03G202100/Glyma.13G134500/Glyma.09G263300/Glyma.06G220300/Glyma.10G046400/Glyma.17G091000/Glyma.01G113000/Glyma.15G012500/Glyma.13G101400/Glyma.03G008300/Glyma.05G196100/Glyma.02G051500/Glyma.17G248200/Glyma.18G197600/Glyma.06G183900/Glyma.07G069700/Glyma.14G077500/Glyma.13G093100/Glyma.19G175600/Glyma.14G152100/Glyma.09G207900/Glyma.06G299200…	47
16 h	00710	Carbon fixation in photosynthetic organisms	45/3321	116/14423	9.63395e-05	0.00100554	0.000735223	Glyma.16G168000/Glyma.15G019300/Glyma.13G097100/Glyma.19G106800/Glyma.16G013900/Glyma.18G030400/Glyma.05G025300/Glyma.09G210900/Glyma.06G087800/Glyma.08G067500/Glyma.13G270400/Glyma.20G192200/Glyma.12G161300/Glyma.01G010200/Glyma.20G122500/Glyma.01G026700/Glyma.07G185400/Glyma.06G015900/Glyma.04G015900/Glyma.07G074700/Glyma.10G205500/Glyma.19G046600/Glyma.07G142700/Glyma.20G125200/Glyma.16G077800…	45
16 h	99997	Function unknown	24/3321	51/14423	0.000136758	0.00134345	0.000982289	Glyma.13G310500/Glyma.17G054200/Glyma.01G161700/Glyma.08G019500/Glyma.08G300800/Glyma.13G107800/Glyma.13G111600/Glyma.13G113900/Glyma.06G293500/Glyma.05G213000/Glyma.07G271000/Glyma.11G082000/Glyma.12G191200/Glyma.11G131700/Glyma.20G164100/Glyma.17G051500/Glyma.20G213200/Glyma.17G045900/Glyma.20G247000/Glyma.10G177000/Glyma.11G110000/Glyma.10G229000/Glyma.12G036900/Glyma.07G273000	24
16 h	00592	alpha-Linolenic acid metabolism	38/3321	98/14423	0.000328682	0.00304944	0.00222965	Glyma.07G246300/Glyma.04G240800/Glyma.12G120300/Glyma.10G124700/Glyma.20G077000/Glyma.07G039900/Glyma.17G050000/Glyma.08G102900/Glyma.14G156400/Glyma.13G239000/Glyma.17G246500/Glyma.12G191400/Glyma.13G047300/Glyma.01G235600/Glyma.19G044900/Glyma.16G008700/Glyma.14G223200/Glyma.11G035200/Glyma.05G180100/Glyma.02G190000/Glyma.17G209900/Glyma.19G132900/Glyma.13G109700/Glyma.19G263300/Glyma.19G057500…	38
16 h	09194	Poorly characterized	27/3321	63/14423	0.000368732	0.00316182	0.00231183	Glyma.13G310500/Glyma.17G054200/Glyma.01G161700/Glyma.08G019500/Glyma.08G300800/Glyma.13G107800/Glyma.13G111600/Glyma.13G113900/Glyma.06G293500/Glyma.05G213000/Glyma.07G271000/Glyma.17G069700/Glyma.11G082000/Glyma.12G191200/Glyma.11G131700/Glyma.20G164100/Glyma.17G051500/Glyma.20G213200/Glyma.01G093200/Glyma.17G045900/Glyma.20G247000/Glyma.10G177000/Glyma.11G110000/Glyma.20G144800/Glyma.10G229000…	27
16 h	01009	Protein phosphatases and associated proteins	137/3321	460/14423	0.00039978	0.00316182	0.00231183	Glyma.08G126400/Glyma.04G059000/Glyma.18G279500/Glyma.09G195800/Glyma.19G077700/Glyma.20G218400/Glyma.13G145700/Glyma.07G148100/Glyma.15G129300/Glyma.19G082900/Glyma.08G195200/Glyma.03G146900/Glyma.15G143000/Glyma.01G219800/Glyma.13G130900/Glyma.01G038800/Glyma.13G165300/Glyma.14G017800/Glyma.03G091100/Glyma.13G002100/Glyma.09G282200/Glyma.06G039200/Glyma.02G235700/Glyma.02G170500/Glyma.15G236700…	137
16 h	00906	Carotenoid biosynthesis	23/3321	51/14423	0.000407821	0.00316182	0.00231183	Glyma.19G251000/Glyma.11G252500/Glyma.10G231200/Glyma.02G240200/Glyma.03G128900/Glyma.09G252800/Glyma.10G086700/Glyma.18G111900/Glyma.20G227900/Glyma.02G272200/Glyma.15G172200/Glyma.13G147500/Glyma.01G154900/Glyma.14G209700/Glyma.18G239900/Glyma.11G151700/Glyma.09G066200/Glyma.08G306200/Glyma.14G045100/Glyma.09G000600/Glyma.19G160300/Glyma.08G176300/Glyma.02G104300	23
16 h	04712	Circadian rhythm - plant	38/3321	99/14423	0.000416527	0.00316182	0.00231183	Glyma.04G101500/Glyma.09G056100/Glyma.10G141400/Glyma.17G231600/Glyma.11G050000/Glyma.01G192100/Glyma.20G170000/Glyma.10G221500/Glyma.11G018700/Glyma.16G163200/Glyma.06G103200/Glyma.07G058200/Glyma.04G166300/Glyma.06G196200/Glyma.05G067100/Glyma.20G209900/Glyma.16G017400/Glyma.17G102200/Glyma.05G025000/Glyma.04G050200/Glyma.19G260900/Glyma.04G228300/Glyma.13G089200/Glyma.06G136600/Glyma.19G222000…	38
16 h	04146	Peroxisome	50/3321	142/14423	0.000635454	0.00461395	0.00337358	Glyma.19G128600/Glyma.14G207700/Glyma.07G080200/Glyma.08G203400/Glyma.05G037400/Glyma.03G250100/Glyma.12G120300/Glyma.15G083100/Glyma.05G005300/Glyma.14G211000/Glyma.17G225600/Glyma.09G007100/Glyma.15G111500/Glyma.10G124700/Glyma.20G004600/Glyma.20G077000/Glyma.05G141400/Glyma.10G249700/Glyma.02G241200/Glyma.17G089700/Glyma.11G254100/Glyma.14G223500/Glyma.20G143900/Glyma.12G221000/Glyma.13G317600…	50
16 h	00071	Fatty acid degradation	34/3321	89/14423	0.000902118	0.00627724	0.00458972	Glyma.13G030400/Glyma.07G246300/Glyma.04G240800/Glyma.12G120300/Glyma.09G042000/Glyma.10G124700/Glyma.17G091000/Glyma.20G077000/Glyma.09G161600/Glyma.15G150900/Glyma.10G249700/Glyma.11G254100/Glyma.20G143900/Glyma.14G156400/Glyma.02G051500/Glyma.14G042000/Glyma.06G183900/Glyma.11G017900/Glyma.14G152100/Glyma.11G035200/Glyma.05G180100/Glyma.20G060300/Glyma.07G161900/Glyma.01G031500/Glyma.13G170600…	34
16 h	09109	Metabolism of terpenoids and polyketides	93/3321	309/14423	0.0022534	0.0150527	0.0110061	Glyma.13G030400/Glyma.19G251000/Glyma.11G252500/Glyma.07G252600/Glyma.12G173200/Glyma.04G237000/Glyma.13G326400/Glyma.06G038700/Glyma.10G062200/Glyma.10G231200/Glyma.11G228900/Glyma.02G240200/Glyma.02G273100/Glyma.03G128900/Glyma.17G091000/Glyma.01G156700/Glyma.13G262200/Glyma.16G200200/Glyma.09G252800/Glyma.15G093900/Glyma.10G086700/Glyma.14G059900/Glyma.18G111900/Glyma.20G227900/Glyma.02G272200…	93
16 h	00520	Amino sugar and nucleotide sugar metabolism	79/3321	258/14423	0.0027982	0.0177602	0.0129857	Glyma.05G152300/Glyma.07G081600/Glyma.01G226900/Glyma.12G201500/Glyma.03G259000/Glyma.10G032400/Glyma.11G141300/Glyma.19G257700/Glyma.11G075700/Glyma.03G027300/Glyma.01G139500/Glyma.18G264700/Glyma.10G018400/Glyma.08G309900/Glyma.19G038000/Glyma.09G030300/Glyma.08G242500/Glyma.11G015800/Glyma.19G124500/Glyma.03G159200/Glyma.14G218800/Glyma.08G348000/Glyma.15G051500/Glyma.15G029800/Glyma.06G205900…	79
16 h	09106	Metabolism of other amino acids	107/3321	365/14423	0.00287141	0.0177602	0.0129857	Glyma.05G221700/Glyma.16G000200/Glyma.13G030400/Glyma.16G063200/Glyma.02G282000/Glyma.11G088200/Glyma.02G141800/Glyma.12G163700/Glyma.09G168900/Glyma.08G276400/Glyma.12G120300/Glyma.05G005300/Glyma.18G190300/Glyma.01G040000/Glyma.14G211000/Glyma.03G117300/Glyma.16G113100/Glyma.07G013800/Glyma.15G055500/Glyma.09G007100/Glyma.08G307800/Glyma.15G111500/Glyma.17G091000/Glyma.14G184500/Glyma.18G116300…	107
16 h	09108	Metabolism of cofactors and vitamins	129/3321	453/14423	0.0035943	0.0208487	0.0152439	Glyma.01G196300/Glyma.13G030400/Glyma.18G158900/Glyma.03G176800/Glyma.13G225000/Glyma.02G282000/Glyma.17G089200/Glyma.03G060100/Glyma.06G113500/Glyma.07G188200/Glyma.07G252600/Glyma.12G020100/Glyma.04G050400/Glyma.04G210000/Glyma.19G177500/Glyma.08G330200/Glyma.11G235400/Glyma.01G226700/Glyma.04G093600/Glyma.08G188200/Glyma.16G042000/Glyma.15G055500/Glyma.10G128400/Glyma.06G159900/Glyma.01G227400…	129
16 h	00650	Butanoate metabolism	16/3321	36/14423	0.00362044	0.0208487	0.0152439	Glyma.19G128600/Glyma.09G168900/Glyma.11G096200/Glyma.16G200200/Glyma.17G132300/Glyma.07G235400/Glyma.06G254700/Glyma.16G028700/Glyma.07G059800/Glyma.16G218500/Glyma.20G043000/Glyma.14G211100/Glyma.18G043600/Glyma.14G036600/Glyma.02G277900/Glyma.11G213000	16
16 h	00500	Starch and sucrose metabolism	72/3321	235/14423	0.00411215	0.022891	0.0167372	Glyma.08G334000/Glyma.01G226900/Glyma.18G136200/Glyma.06G129400/Glyma.12G005200/Glyma.08G244900/Glyma.11G015800/Glyma.14G218800/Glyma.16G217900/Glyma.05G219200/Glyma.11G176400/Glyma.13G161600/Glyma.02G018700/Glyma.07G172000/Glyma.15G029800/Glyma.20G153600/Glyma.15G182600/Glyma.06G323700/Glyma.11G127200/Glyma.05G226600/Glyma.14G222600/Glyma.17G109700/Glyma.08G028900/Glyma.02G086200/Glyma.08G288600…	72
16 h	00562	Inositol phosphate metabolism	37/3321	107/14423	0.00428079	0.0230611	0.0168615	Glyma.07G216600/Glyma.06G109400/Glyma.08G276400/Glyma.07G045600/Glyma.10G060000/Glyma.15G046400/Glyma.04G088000/Glyma.20G013500/Glyma.07G107000/Glyma.14G059200/Glyma.20G173200/Glyma.04G009800/Glyma.08G186400/Glyma.11G178400/Glyma.18G027200/Glyma.05G197200/Glyma.02G257200/Glyma.07G013900/Glyma.11G230000/Glyma.08G127700/Glyma.06G089800/Glyma.07G266200/Glyma.14G059400/Glyma.13G146200/Glyma.10G218400…	37
16 h	00330	Arginine and proline metabolism	39/3321	115/14423	0.00499768	0.0252913	0.0184922	Glyma.05G141900/Glyma.13G030400/Glyma.02G282000/Glyma.17G163900/Glyma.17G021200/Glyma.08G106000/Glyma.17G091000/Glyma.18G278800/Glyma.18G116300/Glyma.10G297300/Glyma.02G128000/Glyma.17G092400/Glyma.08G288100/Glyma.18G137100/Glyma.09G227500/Glyma.02G051500/Glyma.03G129100/Glyma.10G259100/Glyma.06G007500/Glyma.06G183900/Glyma.05G029200/Glyma.14G152100/Glyma.05G029100/Glyma.08G303800/Glyma.01G099800…	39
16 h	04070	Phosphatidylinositol signaling system	39/3321	115/14423	0.00499768	0.0252913	0.0184922	Glyma.07G216600/Glyma.20G207000/Glyma.06G109400/Glyma.17G077100/Glyma.07G045600/Glyma.10G060000/Glyma.15G046400/Glyma.04G088000/Glyma.20G013500/Glyma.10G183200/Glyma.07G107000/Glyma.14G059200/Glyma.18G255000/Glyma.20G173200/Glyma.04G009800/Glyma.08G186400/Glyma.05G196100/Glyma.05G079700/Glyma.18G027200/Glyma.09G241100/Glyma.05G197200/Glyma.02G257200/Glyma.11G230000/Glyma.08G127700/Glyma.06G089800…	39
16 h	00910	Nitrogen metabolism	23/3321	60/14423	0.00548652	0.0264779	0.0193599	Glyma.08G196200/Glyma.13G257200/Glyma.07G012500/Glyma.01G030500/Glyma.10G005200/Glyma.07G212800/Glyma.02G132100/Glyma.19G130800/Glyma.03G128300/Glyma.02G244000/Glyma.09G173200/Glyma.18G041100/Glyma.16G041200/Glyma.11G215500/Glyma.15G057700/Glyma.17G161900/Glyma.03G133600/Glyma.13G210800/Glyma.15G102000/Glyma.18G138400/Glyma.02G213700/Glyma.13G084000/Glyma.06G109200	23
16 h	00770	Pantothenate and CoA biosynthesis	28/3321	77/14423	0.00554927	0.0264779	0.0193599	Glyma.01G196300/Glyma.13G030400/Glyma.02G282000/Glyma.17G089200/Glyma.15G055500/Glyma.17G091000/Glyma.18G116300/Glyma.01G173050/Glyma.02G164100/Glyma.02G051500/Glyma.18G139100/Glyma.08G285700/Glyma.08G028900/Glyma.06G183900/Glyma.14G152100/Glyma.08G303800/Glyma.02G278600/Glyma.01G031500/Glyma.13G170600/Glyma.14G209400/Glyma.02G034000/Glyma.14G036000/Glyma.13G340000/Glyma.04G248500/Glyma.16G131700…	28
16 h	04136	Autophagy - other	24/3321	64/14423	0.00635994	0.029503	0.0215717	Glyma.09G003900/Glyma.03G069800/Glyma.12G005700/Glyma.07G211600/Glyma.01G038800/Glyma.02G008800/Glyma.07G261000/Glyma.07G125200/Glyma.09G231000/Glyma.01G099600/Glyma.02G240700/Glyma.11G031800/Glyma.05G058300/Glyma.19G163500/Glyma.17G070200/Glyma.07G048400/Glyma.17G140700/Glyma.02G220700/Glyma.16G017300/Glyma.17G013000/Glyma.01G210200/Glyma.14G187000/Glyma.04G215500/Glyma.08G146700	24
16 h	00340	Histidine metabolism	16/3321	38/14423	0.00686654	0.0309922	0.0226606	Glyma.13G030400/Glyma.17G091000/Glyma.04G009800/Glyma.02G051500/Glyma.06G183900/Glyma.14G152100/Glyma.01G031500/Glyma.13G170600/Glyma.02G034000/Glyma.13G340000/Glyma.04G248500/Glyma.16G131700/Glyma.06G114300/Glyma.12G057400/Glyma.15G034400/Glyma.08G076400	16
16 h	00380	Tryptophan metabolism	25/3321	68/14423	0.00725187	0.0318701	0.0233024	Glyma.13G030400/Glyma.08G106000/Glyma.17G091000/Glyma.19G206200/Glyma.14G223500/Glyma.02G051500/Glyma.04G017500/Glyma.06G183900/Glyma.06G017900/Glyma.14G152100/Glyma.09G190700/Glyma.01G031500/Glyma.03G208900/Glyma.06G081300/Glyma.10G041800/Glyma.13G170600/Glyma.02G034000/Glyma.07G086200/Glyma.13G340000/Glyma.04G248500/Glyma.16G131700/Glyma.06G114300/Glyma.12G057400/Glyma.15G034400/Glyma.02G029900	25
16 h	00565	Ether lipid metabolism	18/3321	46/14423	0.0104179	0.0446099	0.0326174	Glyma.04G033600/Glyma.01G162100/Glyma.15G152100/Glyma.02G093500/Glyma.06G061500/Glyma.01G215100/Glyma.11G178400/Glyma.06G033800/Glyma.05G168300/Glyma.18G288600/Glyma.02G190000/Glyma.19G132900/Glyma.03G130900/Glyma.13G364900/Glyma.03G092800/Glyma.06G020500/Glyma.16G081200/Glyma.18G265800	18
20 h	09159	Environmental adaptation	205/3547	467/14423	1.51304e-20	2.51164e-18	1.86342e-18	Glyma.17G251000/Glyma.08G317700/Glyma.06G223800/Glyma.07G051600/Glyma.06G108900/Glyma.11G050000/Glyma.11G018700/Glyma.07G003200/Glyma.04G166300/Glyma.08G180800/Glyma.04G050200/Glyma.02G138800/Glyma.04G157200/Glyma.15G048600/Glyma.08G316500/Glyma.07G238700/Glyma.17G039800/Glyma.02G048300/Glyma.06G196200/Glyma.13G141000/Glyma.15G051600/Glyma.08G177600/Glyma.06G103200/Glyma.20G054500/Glyma.03G260300…	205
20 h	04626	Plant-pathogen interaction	170/3547	368/14423	5.98386e-20	4.96661e-18	3.6848e-18	Glyma.17G251000/Glyma.08G317700/Glyma.06G223800/Glyma.07G051600/Glyma.06G108900/Glyma.07G003200/Glyma.08G180800/Glyma.02G138800/Glyma.04G157200/Glyma.15G048600/Glyma.08G316500/Glyma.07G238700/Glyma.17G039800/Glyma.02G048300/Glyma.13G141000/Glyma.15G051600/Glyma.08G177600/Glyma.20G054500/Glyma.03G260300/Glyma.09G254800/Glyma.14G165700/Glyma.04G204400/Glyma.05G245600/Glyma.04G203200/Glyma.08G360600…	170
20 h	01001	Protein kinases	190/3547	454/14423	1.76354e-16	9.75828e-15	7.23981e-15	Glyma.10G181500/Glyma.10G009900/Glyma.01G149000/Glyma.03G243500/Glyma.07G051600/Glyma.02G286800/Glyma.11G147500/Glyma.07G066800/Glyma.08G150000/Glyma.20G208900/Glyma.17G188300/Glyma.18G240600/Glyma.16G158700/Glyma.06G108900/Glyma.15G102500/Glyma.11G050000/Glyma.16G088700/Glyma.10G038400/Glyma.01G082700/Glyma.20G219600/Glyma.07G003200/Glyma.10G094500/Glyma.08G180800/Glyma.03G191000/Glyma.04G207900…	190
20 h	04016	MAPK signaling pathway - plant	92/3547	208/14423	3.77256e-10	1.56561e-08	1.16155e-08	Glyma.16G025900/Glyma.06G108900/Glyma.12G241700/Glyma.07G003200/Glyma.08G180800/Glyma.03G191000/Glyma.03G216700/Glyma.02G138800/Glyma.15G048600/Glyma.08G005100/Glyma.14G223500/Glyma.07G238700/Glyma.02G250200/Glyma.19G191600/Glyma.16G009300/Glyma.15G051600/Glyma.13G041800/Glyma.04G017500/Glyma.13G145100/Glyma.13G076700/Glyma.02G165800/Glyma.09G254800/Glyma.14G165700/Glyma.04G203200/Glyma.05G198700…	92
20 h	99980	Enzymes with EC numbers	153/3547	402/14423	8.75445e-10	2.90648e-08	2.15636e-08	Glyma.08G299900/Glyma.08G149400/Glyma.10G022700/Glyma.09G015400/Glyma.19G061900/Glyma.18G220400/Glyma.05G138700/Glyma.04G093600/Glyma.13G348200/Glyma.02G129500/Glyma.09G008500/Glyma.14G182100/Glyma.10G167200/Glyma.06G175900/Glyma.08G286800/Glyma.13G253800/Glyma.07G189900/Glyma.15G061100/Glyma.12G132800/Glyma.07G174800/Glyma.08G059300/Glyma.14G099200/Glyma.19G239400/Glyma.19G175900/Glyma.08G359300…	153
20 h	09191	Unclassified: metabolism	156/3547	415/14423	1.67637e-09	4.63797e-08	3.44098e-08	Glyma.08G299900/Glyma.08G149400/Glyma.10G022700/Glyma.09G015400/Glyma.19G061900/Glyma.18G220400/Glyma.05G138700/Glyma.07G066700/Glyma.04G093600/Glyma.13G348200/Glyma.02G129500/Glyma.09G008500/Glyma.14G182100/Glyma.10G167200/Glyma.06G175900/Glyma.08G286800/Glyma.13G253800/Glyma.07G189900/Glyma.15G061100/Glyma.12G132800/Glyma.07G174800/Glyma.08G059300/Glyma.14G099200/Glyma.19G239400/Glyma.19G175900…	156
20 h	01003	Glycosyltransferases	119/3547	320/14423	2.78278e-07	6.59916e-06	4.89602e-06	Glyma.12G113302/Glyma.18G220200/Glyma.18G105900/Glyma.13G269200/Glyma.08G309900/Glyma.13G058100/Glyma.06G129400/Glyma.10G128800/Glyma.12G201500/Glyma.15G275000/Glyma.13G370500/Glyma.08G127200/Glyma.08G324800/Glyma.08G145600/Glyma.11G243000/Glyma.20G120300/Glyma.07G046500/Glyma.08G324900/Glyma.15G245800/Glyma.01G016400/Glyma.09G017000/Glyma.02G081000/Glyma.05G187300/Glyma.06G240600/Glyma.19G038000…	119
20 h	00410	beta-Alanine metabolism	44/3547	89/14423	3.3285e-07	6.90664e-06	5.12414e-06	Glyma.06G178400/Glyma.15G055500/Glyma.17G091000/Glyma.09G007100/Glyma.06G183900/Glyma.14G032300/Glyma.08G276400/Glyma.02G282000/Glyma.03G117300/Glyma.08G307800/Glyma.08G282800/Glyma.15G111500/Glyma.07G151500/Glyma.16G080900/Glyma.05G180100/Glyma.16G218500/Glyma.18G116300/Glyma.18G109900/Glyma.14G152100/Glyma.20G145200/Glyma.09G227500/Glyma.11G035200/Glyma.18G043600/Glyma.01G062400/Glyma.02G278600…	44
20 h	00591	Linoleic acid metabolism	25/3547	45/14423	8.42963e-06	0.00015548	0.000115353	Glyma.07G039900/Glyma.08G102900/Glyma.19G132900/Glyma.16G008700/Glyma.08G189600/Glyma.03G130900/Glyma.13G239000/Glyma.02G190000/Glyma.12G054700/Glyma.19G263300/Glyma.07G034800/Glyma.11G130200/Glyma.20G144600/Glyma.13G030300/Glyma.15G026400/Glyma.U039300/Glyma.07G007000/Glyma.10G249100/Glyma.07G034900/Glyma.03G264300/Glyma.11G130300/Glyma.07G196800/Glyma.15G026500/Glyma.07G006900/Glyma.13G347700	25
20 h	00520	Amino sugar and nucleotide sugar metabolism	94/3547	258/14423	1.27054e-05	0.00021091	0.000156477	Glyma.11G223700/Glyma.18G220200/Glyma.18G105900/Glyma.13G133800/Glyma.17G257800/Glyma.02G250800/Glyma.08G309900/Glyma.13G058100/Glyma.08G243000/Glyma.12G201500/Glyma.11G141200/Glyma.05G050500/Glyma.01G167500/Glyma.03G006900/Glyma.05G132100/Glyma.05G152300/Glyma.09G017000/Glyma.19G038000/Glyma.09G030300/Glyma.07G081600/Glyma.10G018400/Glyma.03G159200/Glyma.11G015800/Glyma.12G180300/Glyma.18G264700…	94
20 h	00053	Ascorbate and aldarate metabolism	35/3547	74/14423	1.79318e-05	0.000270608	0.000200768	Glyma.17G091000/Glyma.08G243000/Glyma.06G183900/Glyma.19G061200/Glyma.18G092900/Glyma.05G224500/Glyma.06G114400/Glyma.11G150243/Glyma.13G076900/Glyma.06G068200/Glyma.04G009800/Glyma.16G073100/Glyma.10G162000/Glyma.02G292800/Glyma.20G224400/Glyma.12G032300/Glyma.13G057700/Glyma.11G107200/Glyma.14G152100/Glyma.18G265100/Glyma.05G022600/Glyma.19G028500/Glyma.01G031500/Glyma.13G170600/Glyma.05G002500…	35
20 h	04040	Ion channels	40/3547	89/14423	2.13041e-05	0.000294707	0.000218647	Glyma.13G308500/Glyma.06G223800/Glyma.04G157200/Glyma.12G194100/Glyma.13G141000/Glyma.16G218200/Glyma.16G111700/Glyma.13G161800/Glyma.18G263900/Glyma.01G193700/Glyma.13G308400/Glyma.05G077100/Glyma.14G161600/Glyma.12G099500/Glyma.07G056400/Glyma.09G168700/Glyma.12G204400/Glyma.06G126600/Glyma.13G296900/Glyma.19G221000/Glyma.10G053900/Glyma.02G299700/Glyma.14G014100/Glyma.01G157900/Glyma.06G077600…	40
20 h	00561	Glycerolipid metabolism	49/3547	117/14423	2.79644e-05	0.00033181	0.000246175	Glyma.17G091000/Glyma.12G045700/Glyma.19G175600/Glyma.06G183900/Glyma.01G113000/Glyma.09G207900/Glyma.09G263300/Glyma.13G134500/Glyma.10G046400/Glyma.17G077100/Glyma.18G197600/Glyma.09G160400/Glyma.03G174900/Glyma.06G220300/Glyma.15G012500/Glyma.05G196100/Glyma.03G008300/Glyma.19G132900/Glyma.13G093100/Glyma.07G069700/Glyma.13G085700/Glyma.13G101400/Glyma.14G152100/Glyma.17G248200/Glyma.03G130900…	49
20 h	00903	Limonene and pinene degradation	13/3547	18/14423	2.7984e-05	0.00033181	0.000246175	Glyma.17G091000/Glyma.06G183900/Glyma.14G152100/Glyma.01G031500/Glyma.13G170600/Glyma.16G131700/Glyma.02G034000/Glyma.13G340000/Glyma.02G051500/Glyma.12G057400/Glyma.06G114300/Glyma.04G248500/Glyma.15G034400	13
20 h	01009	Protein phosphatases and associated proteins	149/3547	460/14423	7.62657e-05	0.000815519	0.000605046	Glyma.13G145700/Glyma.18G199400/Glyma.15G143000/Glyma.09G037900/Glyma.02G295600/Glyma.10G058900/Glyma.14G017800/Glyma.15G129300/Glyma.03G185200/Glyma.07G012000/Glyma.04G087200/Glyma.19G082900/Glyma.18G279500/Glyma.01G189500/Glyma.09G195800/Glyma.08G195200/Glyma.09G142100/Glyma.19G077700/Glyma.06G008000/Glyma.06G078100/Glyma.04G059000/Glyma.17G208400/Glyma.08G029600/Glyma.02G257400/Glyma.07G238700…	149
20 h	00630	Glyoxylate and dicarboxylate metabolism	48/3547	118/14423	8.10924e-05	0.000815519	0.000605046	Glyma.08G311200/Glyma.17G142800/Glyma.14G223500/Glyma.13G308700/Glyma.04G017500/Glyma.14G026400/Glyma.12G193800/Glyma.14G094700/Glyma.12G098900/Glyma.13G097100/Glyma.06G017900/Glyma.19G046600/Glyma.17G012000/Glyma.03G128300/Glyma.09G247900/Glyma.09G173200/Glyma.07G081900/Glyma.05G141400/Glyma.19G130800/Glyma.15G012500/Glyma.18G150000/Glyma.02G038100/Glyma.09G015500/Glyma.02G288500/Glyma.02G244000…	48
20 h	04070	Phosphatidylinositol signaling system	47/3547	115/14423	8.3517e-05	0.000815519	0.000605046	Glyma.08G186400/Glyma.06G096300/Glyma.06G218300/Glyma.08G156400/Glyma.01G189500/Glyma.10G060000/Glyma.07G238700/Glyma.07G216600/Glyma.20G173200/Glyma.04G213400/Glyma.14G059200/Glyma.04G030000/Glyma.06G109400/Glyma.04G253100/Glyma.04G088000/Glyma.10G255000/Glyma.17G077100/Glyma.10G183200/Glyma.13G065500/Glyma.18G255000/Glyma.20G013500/Glyma.18G027200/Glyma.07G107000/Glyma.09G241100/Glyma.08G241500…	47
20 h	99997	Function unknown	25/3547	51/14423	0.000134817	0.00124332	0.000922434	Glyma.13G078800/Glyma.05G213000/Glyma.08G019500/Glyma.06G293500/Glyma.13G111600/Glyma.13G107800/Glyma.07G271000/Glyma.03G066000/Glyma.17G051500/Glyma.17G054200/Glyma.13G113900/Glyma.11G082000/Glyma.12G191200/Glyma.11G131700/Glyma.10G177000/Glyma.01G161700/Glyma.20G213200/Glyma.17G045900/Glyma.11G110000/Glyma.20G164100/Glyma.17G002900/Glyma.20G247000/Glyma.10G229000/Glyma.12G036900/Glyma.07G273000	25
20 h	00562	Inositol phosphate metabolism	43/3547	107/14423	0.000256043	0.002237	0.00165967	Glyma.08G186400/Glyma.06G096300/Glyma.06G218300/Glyma.08G156400/Glyma.01G189500/Glyma.06G169100/Glyma.10G060000/Glyma.08G276400/Glyma.07G216600/Glyma.20G173200/Glyma.04G213400/Glyma.14G059200/Glyma.04G030000/Glyma.06G109400/Glyma.11G178400/Glyma.04G253100/Glyma.04G088000/Glyma.10G255000/Glyma.20G013500/Glyma.05G224500/Glyma.18G027200/Glyma.07G107000/Glyma.08G241500/Glyma.04G009800/Glyma.08G127700…	43
20 h	09106	Metabolism of other amino acids	119/3547	365/14423	0.000289989	0.00240691	0.00178572	Glyma.07G258600/Glyma.18G137100/Glyma.06G178400/Glyma.05G005300/Glyma.16G000200/Glyma.15G055500/Glyma.16G038300/Glyma.17G148000/Glyma.07G013800/Glyma.17G091000/Glyma.09G007100/Glyma.11G088200/Glyma.01G040000/Glyma.19G114500/Glyma.06G183900/Glyma.01G156600/Glyma.14G032300/Glyma.11G176400/Glyma.08G276400/Glyma.18G284600/Glyma.12G163700/Glyma.15G266700/Glyma.02G282000/Glyma.14G086300/Glyma.16G113100…	119
20 h	09194	Poorly characterized	28/3547	63/14423	0.000442591	0.00349858	0.00259565	Glyma.13G078800/Glyma.05G213000/Glyma.08G019500/Glyma.06G293500/Glyma.13G111600/Glyma.13G107800/Glyma.07G271000/Glyma.03G066000/Glyma.17G051500/Glyma.17G054200/Glyma.13G113900/Glyma.01G093200/Glyma.11G082000/Glyma.12G191200/Glyma.11G131700/Glyma.10G177000/Glyma.17G069700/Glyma.01G161700/Glyma.20G144800/Glyma.20G213200/Glyma.17G045900/Glyma.11G110000/Glyma.20G164100/Glyma.17G002900/Glyma.20G247000…	28
20 h	00280	Valine, leucine and isoleucine degradation	37/3547	91/14423	0.00051282	0.00375509	0.00278596	Glyma.09G042000/Glyma.17G091000/Glyma.08G204300/Glyma.20G077000/Glyma.10G028700/Glyma.16G200200/Glyma.06G183900/Glyma.07G019100/Glyma.11G154423/Glyma.08G276400/Glyma.10G124700/Glyma.06G120300/Glyma.03G117300/Glyma.08G307800/Glyma.15G150900/Glyma.17G132300/Glyma.01G129400/Glyma.01G103100/Glyma.16G080900/Glyma.03G070200/Glyma.07G235400/Glyma.18G109900/Glyma.14G152100/Glyma.20G043000/Glyma.14G036600…	37
20 h	00062	Fatty acid elongation	22/3547	46/14423	0.000520284	0.00375509	0.00278596	Glyma.17G251000/Glyma.09G260200/Glyma.03G260300/Glyma.18G232000/Glyma.11G245600/Glyma.04G149300/Glyma.01G207200/Glyma.08G279700/Glyma.18G146900/Glyma.20G115500/Glyma.18G011500/Glyma.06G058500/Glyma.08G261100/Glyma.04G057800/Glyma.15G042500/Glyma.20G210900/Glyma.11G144809/Glyma.10G179400/Glyma.10G274400/Glyma.10G291700/Glyma.02G001500/Glyma.10G001800	22
20 h	00071	Fatty acid degradation	36/3547	89/14423	0.000680279	0.00470527	0.00349091	Glyma.09G042000/Glyma.17G091000/Glyma.20G077000/Glyma.10G249700/Glyma.06G183900/Glyma.10G124700/Glyma.11G254100/Glyma.11G017900/Glyma.02G274100/Glyma.20G143900/Glyma.15G150900/Glyma.07G151500/Glyma.11G122500/Glyma.04G240800/Glyma.09G161600/Glyma.05G180100/Glyma.12G015300/Glyma.05G151200/Glyma.14G152100/Glyma.11G035200/Glyma.20G060300/Glyma.14G042000/Glyma.14G042200/Glyma.01G031500/Glyma.13G170600…	36
20 h	00592	alpha-Linolenic acid metabolism	38/3547	98/14423	0.00126669	0.00841083	0.00624012	Glyma.20G077000/Glyma.07G162900/Glyma.10G124700/Glyma.07G151500/Glyma.17G050000/Glyma.07G039900/Glyma.08G102900/Glyma.14G223600/Glyma.19G132900/Glyma.04G240800/Glyma.05G180100/Glyma.16G008700/Glyma.12G191400/Glyma.17G246500/Glyma.14G223200/Glyma.01G235600/Glyma.11G035200/Glyma.03G130900/Glyma.13G047300/Glyma.13G239000/Glyma.02G190000/Glyma.17G209900/Glyma.19G044900/Glyma.13G109700/Glyma.12G054700…	38
20 h	00199	Cytochrome P450	36/3547	92/14423	0.00138804	0.008711	0.00646282	Glyma.09G252800/Glyma.02G256800/Glyma.07G162900/Glyma.06G202300/Glyma.08G365000/Glyma.13G147500/Glyma.05G021800/Glyma.14G059900/Glyma.11G228900/Glyma.19G162100/Glyma.20G114200/Glyma.14G205200/Glyma.03G122000/Glyma.19G126000/Glyma.05G208900/Glyma.18G239900/Glyma.02G236500/Glyma.12G191400/Glyma.17G246500/Glyma.13G217400/Glyma.17G118100/Glyma.11G074100/Glyma.16G149300/Glyma.10G202400/Glyma.02G083200…	36
20 h	04136	Autophagy - other	27/3547	64/14423	0.00146484	0.008711	0.00646282	Glyma.12G005700/Glyma.06G096300/Glyma.02G008800/Glyma.07G211600/Glyma.15G108200/Glyma.17G070200/Glyma.05G058300/Glyma.07G261000/Glyma.02G240700/Glyma.01G038800/Glyma.09G231000/Glyma.02G207500/Glyma.16G007300/Glyma.03G069800/Glyma.19G163500/Glyma.09G244800/Glyma.03G097000/Glyma.11G031800/Glyma.17G013000/Glyma.17G140700/Glyma.02G220700/Glyma.16G017300/Glyma.04G215500/Glyma.08G146700/Glyma.07G124300…	27
20 h	00565	Ether lipid metabolism	21/3547	46/14423	0.00146932	0.008711	0.00646282	Glyma.07G080800/Glyma.01G162100/Glyma.06G169100/Glyma.04G033600/Glyma.02G093500/Glyma.15G152100/Glyma.11G178400/Glyma.01G215100/Glyma.06G033800/Glyma.20G238000/Glyma.19G132900/Glyma.05G168300/Glyma.06G061500/Glyma.03G130900/Glyma.18G288600/Glyma.16G081200/Glyma.02G190000/Glyma.18G265800/Glyma.06G020500/Glyma.13G364900/Glyma.03G092800	21
20 h	00945	Stilbenoid, diarylheptanoid and gingerol biosynthesis	18/3547	38/14423	0.00188738	0.0108036	0.00801535	Glyma.18G103500/Glyma.20G114200/Glyma.14G205200/Glyma.03G122000/Glyma.19G126000/Glyma.02G236500/Glyma.07G021600/Glyma.07G214700/Glyma.18G104000/Glyma.13G371000/Glyma.08G220200/Glyma.08G311500/Glyma.17G171100/Glyma.02G103500/Glyma.02G069100/Glyma.11G054500/Glyma.01G187700/Glyma.18G113100	18
20 h	00564	Glycerophospholipid metabolism	59/3547	171/14423	0.00221823	0.0122517	0.00908975	Glyma.07G080800/Glyma.20G056400/Glyma.01G162100/Glyma.12G045700/Glyma.06G169100/Glyma.09G195000/Glyma.04G033600/Glyma.19G175600/Glyma.19G233400/Glyma.06G216800/Glyma.02G093500/Glyma.15G152100/Glyma.09G207900/Glyma.11G178400/Glyma.13G134500/Glyma.10G046400/Glyma.17G077100/Glyma.10G183200/Glyma.19G136100/Glyma.03G174900/Glyma.04G148300/Glyma.06G220300/Glyma.02G078500/Glyma.01G215100/Glyma.06G033800…	59
20 h	09108	Metabolism of cofactors and vitamins	138/3547	453/14423	0.00228798	0.0122517	0.00908975	Glyma.10G211600/Glyma.12G020100/Glyma.14G012500/Glyma.06G113500/Glyma.15G055500/Glyma.01G227400/Glyma.17G150300/Glyma.10G112700/Glyma.17G142800/Glyma.04G093600/Glyma.17G091000/Glyma.01G238400/Glyma.10G048200/Glyma.06G051100/Glyma.08G188200/Glyma.08G029600/Glyma.03G206500/Glyma.06G159900/Glyma.15G025600/Glyma.10G105400/Glyma.03G010700/Glyma.14G154600/Glyma.06G183900/Glyma.03G203800/Glyma.14G032300…	138
20 h	00910	Nitrogen metabolism	25/3547	60/14423	0.00265106	0.0137524	0.0102031	Glyma.17G148000/Glyma.02G035000/Glyma.07G012500/Glyma.01G030500/Glyma.10G005200/Glyma.03G128300/Glyma.09G173200/Glyma.19G130800/Glyma.13G257200/Glyma.02G244000/Glyma.16G041200/Glyma.17G161900/Glyma.18G041100/Glyma.11G215500/Glyma.15G057700/Glyma.03G133600/Glyma.02G213700/Glyma.18G141900/Glyma.13G210800/Glyma.15G102000/Glyma.13G084000/Glyma.18G138400/Glyma.05G007100/Glyma.19G007700/Glyma.06G109200	25
20 h	04146	Peroxisome	50/3547	142/14423	0.00288482	0.0145115	0.0107663	Glyma.15G083100/Glyma.05G005300/Glyma.20G077000/Glyma.09G007100/Glyma.13G340300/Glyma.08G203400/Glyma.14G223500/Glyma.10G249700/Glyma.10G124700/Glyma.04G017500/Glyma.11G254100/Glyma.12G178800/Glyma.11G017900/Glyma.15G034000/Glyma.15G266700/Glyma.20G004600/Glyma.19G236200/Glyma.17G089700/Glyma.12G221000/Glyma.07G080200/Glyma.13G317600/Glyma.20G143900/Glyma.06G017900/Glyma.15G111500/Glyma.07G151500…	50
20 h	00360	Phenylalanine metabolism	19/3547	44/14423	0.0052166	0.0254693	0.018896	Glyma.08G138800/Glyma.06G178400/Glyma.06G254700/Glyma.08G282800/Glyma.08G106000/Glyma.05G181000/Glyma.10G058200/Glyma.20G145200/Glyma.01G062400/Glyma.20G180800/Glyma.19G182300/Glyma.10G209800/Glyma.02G309300/Glyma.02G038500/Glyma.13G145000/Glyma.03G181600/Glyma.03G181700/Glyma.20G145300/Glyma.02G120600	19
20 h	00500	Starch and sucrose metabolism	75/3547	235/14423	0.00634539	0.0300953	0.0223281	Glyma.07G258600/Glyma.17G257800/Glyma.06G129400/Glyma.08G244900/Glyma.20G120300/Glyma.11G176400/Glyma.16G217900/Glyma.05G219200/Glyma.06G318400/Glyma.06G184200/Glyma.11G015800/Glyma.14G218800/Glyma.13G161600/Glyma.06G323700/Glyma.17G109700/Glyma.06G104800/Glyma.05G179800/Glyma.04G119700/Glyma.11G127200/Glyma.05G226600/Glyma.11G116600/Glyma.15G182600/Glyma.15G029800/Glyma.12G005200/Glyma.08G028900…	75
20 h	00240	Pyrimidine metabolism	37/3547	103/14423	0.00658387	0.0303589	0.0225238	Glyma.16G058200/Glyma.08G333400/Glyma.15G055500/Glyma.01G238400/Glyma.02G014200/Glyma.01G047100/Glyma.19G108500/Glyma.09G011500/Glyma.03G069600/Glyma.08G086000/Glyma.15G025600/Glyma.16G043700/Glyma.16G009300/Glyma.13G277200/Glyma.05G131400/Glyma.12G004200/Glyma.08G029000/Glyma.02G069900/Glyma.03G195600/Glyma.14G136600/Glyma.01G099700/Glyma.02G107700/Glyma.03G193800/Glyma.08G028900/Glyma.12G041000…	37
20 h	01004	Lipid biosynthesis proteins	51/3547	152/14423	0.00783834	0.0351666	0.0260906	Glyma.09G260200/Glyma.07G080800/Glyma.04G204300/Glyma.12G045700/Glyma.10G249700/Glyma.09G195000/Glyma.04G033600/Glyma.07G075500/Glyma.17G120400/Glyma.11G254100/Glyma.19G233400/Glyma.11G017900/Glyma.03G056700/Glyma.18G232000/Glyma.03G021000/Glyma.11G245600/Glyma.09G207900/Glyma.18G246900/Glyma.20G143900/Glyma.06G220300/Glyma.11G122500/Glyma.06G033800/Glyma.03G144500/Glyma.01G207200/Glyma.08G279700…	51
20 h	00130	Ubiquinone and other terpenoid-quinone biosynthesis	29/3547	78/14423	0.00890737	0.0382905	0.0284083	Glyma.03G206500/Glyma.06G084100/Glyma.07G188200/Glyma.01G232400/Glyma.01G177600/Glyma.20G114200/Glyma.12G216900/Glyma.15G130500/Glyma.14G205200/Glyma.17G262200/Glyma.13G284200/Glyma.02G002000/Glyma.02G236500/Glyma.15G001700/Glyma.13G095600/Glyma.09G024500/Glyma.17G064600/Glyma.13G249600/Glyma.11G010500/Glyma.18G139700/Glyma.15G064700/Glyma.08G061200/Glyma.12G014300/Glyma.11G120200/Glyma.09G222800…	29
20 h	00330	Arginine and proline metabolism	40/3547	115/14423	0.00899595	0.0382905	0.0284083	Glyma.17G083400/Glyma.18G137100/Glyma.01G071300/Glyma.17G091000/Glyma.05G104400/Glyma.06G183900/Glyma.14G032300/Glyma.20G248500/Glyma.02G282000/Glyma.18G278800/Glyma.17G163900/Glyma.17G021200/Glyma.08G106000/Glyma.02G128000/Glyma.08G288100/Glyma.10G297300/Glyma.06G007500/Glyma.18G116300/Glyma.14G152100/Glyma.09G227500/Glyma.05G029200/Glyma.08G255800/Glyma.01G099800/Glyma.08G303800/Glyma.07G137300…	40
20 h	04712	Circadian rhythm - plant	35/3547	99/14423	0.0106049	0.0439561	0.0326117	Glyma.11G050000/Glyma.11G018700/Glyma.04G166300/Glyma.04G050200/Glyma.06G196200/Glyma.06G103200/Glyma.20G170000/Glyma.16G163200/Glyma.07G058200/Glyma.06G136600/Glyma.01G192100/Glyma.20G209900/Glyma.08G197500/Glyma.17G102200/Glyma.10G221500/Glyma.05G025000/Glyma.16G017400/Glyma.05G067100/Glyma.03G225000/Glyma.08G109400/Glyma.19G260900/Glyma.04G228300/Glyma.19G222000/Glyma.07G048500/Glyma.14G174200…	35
20 h	09109	Metabolism of terpenoids and polyketides	94/3547	309/14423	0.0108566	0.0439561	0.0326117	Glyma.01G156700/Glyma.06G049500/Glyma.18G229700/Glyma.02G273100/Glyma.09G252800/Glyma.19G251000/Glyma.17G091000/Glyma.10G231200/Glyma.05G050500/Glyma.02G059000/Glyma.02G256800/Glyma.04G237000/Glyma.16G200200/Glyma.06G183900/Glyma.02G240200/Glyma.04G055600/Glyma.08G365000/Glyma.19G236200/Glyma.10G062200/Glyma.04G069600/Glyma.15G243100/Glyma.13G147500/Glyma.20G227900/Glyma.18G274400/Glyma.14G059900…	94

## Sheet: OG10-Down
Cluster	ID	Description	GeneRatio	BgRatio	pvalue	p.adjust	qvalue	geneID	Count
0 h	09159	Environmental adaptation	210/3538	467/14423	9.87206e-23	1.63876e-20	1.17426e-20	Glyma.09G128800/Glyma.08G005900/Glyma.01G224200/Glyma.14G006800/Glyma.07G238700/Glyma.04G115500/Glyma.10G107500/Glyma.16G099600/Glyma.01G223200/Glyma.17G231600/Glyma.03G084000/Glyma.12G039400/Glyma.04G157200/Glyma.08G317700/Glyma.08G323200/Glyma.06G108900/Glyma.04G050200/Glyma.19G224200/Glyma.11G050000/Glyma.13G106900/Glyma.04G166300/Glyma.17G039800/Glyma.06G196200/Glyma.04G204400/Glyma.07G003200…	210		Down-regulated' means that gene expressions were decreased in seeds, compared to pod walls
0 h	04626	Plant-pathogen interaction	169/3538	368/14423	1.23437e-19	1.02452e-17	7.34123e-18	Glyma.09G128800/Glyma.08G005900/Glyma.14G006800/Glyma.07G238700/Glyma.04G115500/Glyma.10G107500/Glyma.16G099600/Glyma.01G223200/Glyma.03G084000/Glyma.12G039400/Glyma.04G157200/Glyma.08G317700/Glyma.08G323200/Glyma.06G108900/Glyma.13G106900/Glyma.17G039800/Glyma.04G204400/Glyma.07G003200/Glyma.04G188700/Glyma.02G138800/Glyma.06G223800/Glyma.14G074300/Glyma.16G218200/Glyma.18G263900/Glyma.08G180800…	169
0 h	01003	Glycosyltransferases	136/3538	320/14423	7.83382e-13	4.33471e-11	3.10604e-11	Glyma.08G309900/Glyma.18G085200/Glyma.08G308700/Glyma.13G058100/Glyma.05G018500/Glyma.08G127200/Glyma.08G324800/Glyma.20G244900/Glyma.02G086200/Glyma.20G167900/Glyma.18G136200/Glyma.20G174300/Glyma.18G220200/Glyma.07G172000/Glyma.06G240600/Glyma.13G202500/Glyma.01G063000/Glyma.05G086900/Glyma.11G243000/Glyma.02G100600/Glyma.03G019700/Glyma.02G033500/Glyma.13G050600/Glyma.13G162600/Glyma.18G264700…	136		The top 50 enriched KEGG pathways showed here.
0 h	01001	Protein kinases	175/3538	454/14423	1.25034e-11	5.18889e-10	3.7181e-10	Glyma.08G150000/Glyma.17G053500/Glyma.15G098000/Glyma.10G107500/Glyma.09G212900/Glyma.03G140100/Glyma.05G016900/Glyma.20G208900/Glyma.15G102500/Glyma.18G240600/Glyma.04G029700/Glyma.04G063600/Glyma.01G223200/Glyma.17G188300/Glyma.14G186700/Glyma.17G022800/Glyma.10G038400/Glyma.07G125200/Glyma.16G017300/Glyma.11G002600/Glyma.08G050900/Glyma.03G245500/Glyma.10G005600/Glyma.09G079000/Glyma.10G275400…	175
0 h	99980	Enzymes with EC numbers	154/3538	402/14423	3.67538e-10	1.22023e-08	8.74354e-09	Glyma.06G196400/Glyma.03G242000/Glyma.19G239400/Glyma.02G049400/Glyma.13G069100/Glyma.15G167500/Glyma.05G042700/Glyma.07G174800/Glyma.09G015400/Glyma.19G061900/Glyma.15G061100/Glyma.18G097000/Glyma.13G253800/Glyma.16G073600/Glyma.05G138700/Glyma.08G059300/Glyma.19G136400/Glyma.09G008500/Glyma.03G175200/Glyma.10G022700/Glyma.04G093600/Glyma.16G151100/Glyma.08G286800/Glyma.19G115400/Glyma.07G189900…	154
0 h	04016	MAPK signaling pathway - plant	91/3538	208/14423	8.14014e-10	2.25211e-08	1.61375e-08	Glyma.08G005900/Glyma.07G238700/Glyma.02G250200/Glyma.14G066400/Glyma.14G108400/Glyma.04G147000/Glyma.16G009300/Glyma.06G108900/Glyma.08G005100/Glyma.07G056900/Glyma.03G191000/Glyma.07G003200/Glyma.12G241700/Glyma.13G076700/Glyma.15G031800/Glyma.02G138800/Glyma.13G151100/Glyma.20G009600/Glyma.08G180800/Glyma.10G058300/Glyma.02G165800/Glyma.03G216700/Glyma.15G051600/Glyma.09G002600/Glyma.14G145920…	91
0 h	09191	Unclassified: metabolism	156/3538	415/14423	1.3833e-09	3.28039e-08	2.35057e-08	Glyma.06G196400/Glyma.03G242000/Glyma.18G092500/Glyma.19G239400/Glyma.02G049400/Glyma.13G069100/Glyma.15G167500/Glyma.05G042700/Glyma.07G174800/Glyma.09G015400/Glyma.19G061900/Glyma.15G061100/Glyma.18G097000/Glyma.13G253800/Glyma.16G073600/Glyma.05G138700/Glyma.08G059300/Glyma.19G136400/Glyma.09G008500/Glyma.03G175200/Glyma.10G022700/Glyma.04G093600/Glyma.16G151100/Glyma.08G286800/Glyma.19G115400…	156
0 h	00053	Ascorbate and aldarate metabolism	40/3538	74/14423	4.6268e-08	9.60061e-07	6.87932e-07	Glyma.19G244600/Glyma.01G057100/Glyma.20G051900/Glyma.17G091000/Glyma.05G224500/Glyma.18G092900/Glyma.U031121/Glyma.19G061200/Glyma.08G243000/Glyma.06G068200/Glyma.11G150243/Glyma.06G183900/Glyma.17G077000/Glyma.10G162000/Glyma.02G292800/Glyma.06G114400/Glyma.05G022600/Glyma.04G009800/Glyma.20G224400/Glyma.12G032300/Glyma.14G152100/Glyma.16G073100/Glyma.11G107200/Glyma.02G051500/Glyma.18G265100/G…	40
0 h	00520	Amino sugar and nucleotide sugar metabolism	102/3538	258/14423	5.55075e-08	1.0238e-06	7.33608e-07	Glyma.08G309900/Glyma.08G086700/Glyma.05G152300/Glyma.13G058100/Glyma.05G018500/Glyma.19G244600/Glyma.16G200600/Glyma.01G057100/Glyma.18G220200/Glyma.19G257700/Glyma.11G141200/Glyma.18G229800/Glyma.01G063000/Glyma.03G019700/Glyma.13G050600/Glyma.09G030300/Glyma.11G223700/Glyma.18G264700/Glyma.19G124500/Glyma.17G257800/Glyma.20G153900/Glyma.03G159200/Glyma.12G201500/Glyma.10G045800/Glyma.05G050500…	102
0 h	00500	Starch and sucrose metabolism	93/3538	235/14423	2.00249e-07	3.32413e-06	2.38191e-06	Glyma.08G025500/Glyma.03G192300/Glyma.14G045000/Glyma.02G272100/Glyma.18G232400/Glyma.02G086200/Glyma.18G136200/Glyma.16G200600/Glyma.07G172000/Glyma.02G033500/Glyma.12G129800/Glyma.08G334000/Glyma.11G111500/Glyma.13G114000/Glyma.06G129400/Glyma.08G244900/Glyma.17G257800/Glyma.08G028400/Glyma.20G153900/Glyma.11G176400/Glyma.05G219200/Glyma.16G217900/Glyma.19G113600/Glyma.10G270800/Glyma.14G218800…	93
0 h	00630	Glyoxylate and dicarboxylate metabolism	54/3538	118/14423	3.76382e-07	5.67995e-06	4.06997e-06	Glyma.05G141400/Glyma.19G107300/Glyma.14G207700/Glyma.01G026700/Glyma.07G081900/Glyma.17G228800/Glyma.08G311200/Glyma.14G184500/Glyma.12G098900/Glyma.14G026400/Glyma.13G097100/Glyma.09G015500/Glyma.08G108900/Glyma.06G107800/Glyma.02G244000/Glyma.14G223500/Glyma.19G046600/Glyma.17G012000/Glyma.04G017500/Glyma.02G288500/Glyma.19G046800/Glyma.03G128300/Glyma.13G308700/Glyma.12G193800/Glyma.15G012500…	54
0 h	00561	Glycerolipid metabolism	51/3538	117/14423	4.61295e-06	6.38124e-05	4.57248e-05	Glyma.13G162600/Glyma.09G160400/Glyma.05G022500/Glyma.17G091000/Glyma.17G077100/Glyma.06G220300/Glyma.03G008300/Glyma.10G046400/Glyma.01G113000/Glyma.13G085700/Glyma.14G077500/Glyma.09G263300/Glyma.06G183900/Glyma.19G175600/Glyma.18G197600/Glyma.19G132900/Glyma.09G207900/Glyma.15G012500/Glyma.12G045700/Glyma.14G152100/Glyma.13G093100/Glyma.05G196100/Glyma.07G069700/Glyma.13G134500/Glyma.17G248200…	51
0 h	09109	Metabolism of terpenoids and polyketides	110/3538	309/14423	7.27545e-06	8.91615e-05	6.38887e-05	Glyma.19G251000/Glyma.04G237000/Glyma.13G326400/Glyma.02G240200/Glyma.02G272200/Glyma.08G093400/Glyma.03G128900/Glyma.02G059000/Glyma.11G228900/Glyma.04G055600/Glyma.17G091000/Glyma.17G174500/Glyma.19G236200/Glyma.19G131400/Glyma.18G229700/Glyma.09G252800/Glyma.15G172200/Glyma.13G147500/Glyma.18G118100/Glyma.16G099800/Glyma.05G050500/Glyma.02G256800/Glyma.13G262200/Glyma.01G156700/Glyma.18G111900…	110
0 h	00410	beta-Alanine metabolism	41/3538	89/14423	7.51965e-06	8.91615e-05	6.38887e-05	Glyma.06G178400/Glyma.03G117300/Glyma.08G282800/Glyma.15G111500/Glyma.17G091000/Glyma.08G307800/Glyma.09G007100/Glyma.12G120300/Glyma.16G080900/Glyma.15G055500/Glyma.09G168900/Glyma.09G227500/Glyma.06G183900/Glyma.05G180100/Glyma.14G152100/Glyma.18G109900/Glyma.18G116300/Glyma.02G051500/Glyma.16G218500/Glyma.18G043600/Glyma.08G303800/Glyma.02G278600/Glyma.11G035200/Glyma.02G034000/Glyma.01G062400…	41
0 h	04040	Ion channels	40/3538	89/14423	1.99924e-05	0.00022125	0.000158537	Glyma.08G082200/Glyma.06G016000/Glyma.04G157200/Glyma.12G194100/Glyma.06G223800/Glyma.16G218200/Glyma.18G263900/Glyma.13G308500/Glyma.13G308400/Glyma.01G193700/Glyma.16G111700/Glyma.14G161600/Glyma.09G168700/Glyma.06G126600/Glyma.13G161800/Glyma.05G077100/Glyma.03G257000/Glyma.14G014100/Glyma.19G221000/Glyma.12G204400/Glyma.05G029700/Glyma.02G299700/Glyma.12G099500/Glyma.07G056400/Glyma.06G077600…	40
0 h	00903	Limonene and pinene degradation	13/3538	18/14423	2.71743e-05	0.000281934	0.00020202	Glyma.17G091000/Glyma.06G183900/Glyma.14G152100/Glyma.02G051500/Glyma.02G034000/Glyma.01G031500/Glyma.13G170600/Glyma.13G340000/Glyma.06G114300/Glyma.04G248500/Glyma.16G131700/Glyma.12G057400/Glyma.15G034400	13
0 h	00591	Linoleic acid metabolism	24/3538	45/14423	3.04379e-05	0.000297217	0.000212971	Glyma.08G102900/Glyma.19G132900/Glyma.03G130900/Glyma.07G039900/Glyma.02G190000/Glyma.19G263300/Glyma.16G008700/Glyma.13G239000/Glyma.12G054700/Glyma.10G249100/Glyma.07G034800/Glyma.07G034900/Glyma.20G144600/Glyma.13G030300/Glyma.11G130200/Glyma.15G026400/Glyma.07G007000/Glyma.U039300/Glyma.15G026500/Glyma.03G264300/Glyma.07G196800/Glyma.11G130300/Glyma.07G006900/Glyma.13G347700	24
0 h	00906	Carotenoid biosynthesis	26/3538	51/14423	4.04254e-05	0.000372812	0.000267138	Glyma.19G251000/Glyma.02G240200/Glyma.02G272200/Glyma.03G128900/Glyma.17G174500/Glyma.19G131400/Glyma.09G252800/Glyma.15G172200/Glyma.13G147500/Glyma.18G111900/Glyma.10G231200/Glyma.20G227900/Glyma.10G086700/Glyma.09G066200/Glyma.11G151700/Glyma.08G306200/Glyma.18G239900/Glyma.01G154900/Glyma.14G209700/Glyma.14G045100/Glyma.19G160300/Glyma.09G000600/Glyma.08G176300/Glyma.01G073200/Glyma.02G104300…	26
0 h	01009	Protein phosphatases and associated proteins	150/3538	460/14423	4.36135e-05	0.000381044	0.000273037	Glyma.08G194000/Glyma.07G238700/Glyma.03G146900/Glyma.09G023200/Glyma.17G223800/Glyma.11G246900/Glyma.01G189500/Glyma.09G083800/Glyma.11G023700/Glyma.19G147800/Glyma.03G185200/Glyma.19G077700/Glyma.16G114700/Glyma.15G129300/Glyma.01G219800/Glyma.20G218400/Glyma.18G282300/Glyma.03G245500/Glyma.18G145500/Glyma.04G059000/Glyma.18G010400/Glyma.06G008000/Glyma.07G012000/Glyma.01G038800/Glyma.15G192300…	150
0 h	09106	Metabolism of other amino acids	122/3538	365/14423	6.73134e-05	0.000558702	0.000400338	Glyma.06G178400/Glyma.14G045000/Glyma.02G272100/Glyma.03G195600/Glyma.03G117300/Glyma.02G185300/Glyma.08G282800/Glyma.18G021100/Glyma.15G111500/Glyma.07G013800/Glyma.01G040000/Glyma.16G038300/Glyma.12G163700/Glyma.17G091000/Glyma.15G266700/Glyma.08G307800/Glyma.18G137100/Glyma.20G151500/Glyma.16G063200/Glyma.18G284600/Glyma.11G180900/Glyma.02G187200/Glyma.09G007100/Glyma.12G120300/Glyma.11G176400…	122
0 h	04712	Circadian rhythm - plant	41/3538	99/14423	0.000154485	0.00122117	0.00087503	Glyma.01G224200/Glyma.17G231600/Glyma.04G050200/Glyma.19G224200/Glyma.11G050000/Glyma.04G166300/Glyma.06G196200/Glyma.20G170000/Glyma.06G136600/Glyma.06G103200/Glyma.01G192100/Glyma.04G228300/Glyma.11G018700/Glyma.17G102200/Glyma.16G017400/Glyma.16G163200/Glyma.07G058200/Glyma.10G221500/Glyma.20G209900/Glyma.05G067100/Glyma.19G260900/Glyma.05G025000/Glyma.07G048500/Glyma.08G197500/Glyma.17G149300…	41
0 h	04070	Phosphatidylinositol signaling system	46/3538	115/14423	0.000169648	0.00128007	0.000917234	Glyma.07G238700/Glyma.01G189500/Glyma.10G060000/Glyma.20G207000/Glyma.07G045600/Glyma.04G213400/Glyma.07G216600/Glyma.10G255000/Glyma.05G022500/Glyma.08G186400/Glyma.17G077100/Glyma.04G088000/Glyma.20G013500/Glyma.04G253100/Glyma.10G183200/Glyma.06G109400/Glyma.15G046400/Glyma.14G059200/Glyma.09G241100/Glyma.18G255000/Glyma.08G127700/Glyma.04G009800/Glyma.18G027200/Glyma.13G093100/Glyma.11G230000…	46
0 h	00908	Zeatin biosynthesis	23/3538	48/14423	0.000363097	0.00262061	0.0018778	Glyma.04G055600/Glyma.10G062200/Glyma.18G274400/Glyma.08G365000/Glyma.11G149100/Glyma.10G273500/Glyma.15G103800/Glyma.20G116500/Glyma.02G184200/Glyma.14G099000/Glyma.02G148600/Glyma.10G025300/Glyma.03G134500/Glyma.18G297200/Glyma.12G011400/Glyma.03G187700/Glyma.15G170300/Glyma.09G063900/Glyma.19G187100/Glyma.19G135100/Glyma.19G187000/Glyma.03G187000/Glyma.09G225400	23
0 h	00564	Glycerophospholipid metabolism	62/3538	171/14423	0.000384888	0.00266214	0.00190756	Glyma.07G080400/Glyma.18G064000/Glyma.02G078500/Glyma.04G033600/Glyma.02G165500/Glyma.20G207000/Glyma.09G195000/Glyma.05G022500/Glyma.07G080800/Glyma.06G216800/Glyma.17G077100/Glyma.15G152100/Glyma.06G220300/Glyma.03G008300/Glyma.10G046400/Glyma.05G168300/Glyma.01G215100/Glyma.19G233400/Glyma.10G183200/Glyma.13G085700/Glyma.05G020500/Glyma.14G077500/Glyma.06G169100/Glyma.04G148300/Glyma.06G176400…	62
0 h	00592	alpha-Linolenic acid metabolism	39/3538	98/14423	0.00057826	0.00381249	0.00273184	Glyma.17G050000/Glyma.08G102900/Glyma.12G120300/Glyma.10G124700/Glyma.11G122700/Glyma.20G077000/Glyma.07G162900/Glyma.19G132900/Glyma.08G256600/Glyma.05G180100/Glyma.04G240800/Glyma.03G130900/Glyma.07G039900/Glyma.17G246500/Glyma.17G209900/Glyma.12G191400/Glyma.01G235600/Glyma.14G223200/Glyma.02G190000/Glyma.19G263300/Glyma.13G047300/Glyma.11G035200/Glyma.16G008700/Glyma.13G109700/Glyma.13G239000…	39
0 h	00945	Stilbenoid, diarylheptanoid and gingerol biosynthesis	19/3538	38/14423	0.000597137	0.00381249	0.00273184	Glyma.18G103500/Glyma.10G060700/Glyma.20G114200/Glyma.14G205200/Glyma.03G122000/Glyma.07G021600/Glyma.19G126000/Glyma.02G236500/Glyma.07G214700/Glyma.08G220200/Glyma.17G171100/Glyma.13G371000/Glyma.18G104000/Glyma.02G069100/Glyma.02G103500/Glyma.01G187700/Glyma.08G311500/Glyma.11G054500/Glyma.18G113100	19
0 h	00199	Cytochrome P450	37/3538	92/14423	0.000624153	0.00383739	0.00274968	Glyma.11G228900/Glyma.09G252800/Glyma.13G147500/Glyma.06G202300/Glyma.02G256800/Glyma.07G110900/Glyma.11G122700/Glyma.20G114200/Glyma.14G059900/Glyma.08G365000/Glyma.14G205200/Glyma.07G162900/Glyma.05G208900/Glyma.03G122000/Glyma.05G021800/Glyma.19G162100/Glyma.19G126000/Glyma.17G246500/Glyma.02G236500/Glyma.12G191400/Glyma.18G239900/Glyma.13G217400/Glyma.11G074100/Glyma.16G089700/Glyma.16G149300…	37
0 h	00562	Inositol phosphate metabolism	41/3538	107/14423	0.0010391	0.00600607	0.00430365	Glyma.01G189500/Glyma.18G064000/Glyma.10G060000/Glyma.07G045600/Glyma.04G213400/Glyma.07G216600/Glyma.10G255000/Glyma.08G186400/Glyma.04G088000/Glyma.05G224500/Glyma.20G013500/Glyma.04G253100/Glyma.06G109400/Glyma.15G046400/Glyma.14G059200/Glyma.06G169100/Glyma.11G178400/Glyma.08G127700/Glyma.04G009800/Glyma.18G027200/Glyma.11G230000/Glyma.20G173200/Glyma.08G241500/Glyma.07G107000/Glyma.02G257200…	41
0 h	00280	Valine, leucine and isoleucine degradation	36/3538	91/14423	0.00104925	0.00600607	0.00430365	Glyma.03G117300/Glyma.01G196300/Glyma.15G150900/Glyma.07G019100/Glyma.07G213500/Glyma.09G042000/Glyma.10G028700/Glyma.11G154423/Glyma.17G091000/Glyma.08G307800/Glyma.16G080900/Glyma.08G204300/Glyma.10G124700/Glyma.20G077000/Glyma.17G132300/Glyma.06G183900/Glyma.01G103100/Glyma.01G129400/Glyma.07G235400/Glyma.14G152100/Glyma.18G109900/Glyma.03G070200/Glyma.02G051500/Glyma.20G043000/Glyma.02G277900…	36
0 h	00071	Fatty acid degradation	35/3538	89/14423	0.00138318	0.00736329	0.00527617	Glyma.15G150900/Glyma.11G122500/Glyma.09G042000/Glyma.10G249700/Glyma.09G161600/Glyma.17G091000/Glyma.12G120300/Glyma.11G254100/Glyma.10G124700/Glyma.02G274100/Glyma.20G143900/Glyma.20G077000/Glyma.11G017900/Glyma.06G183900/Glyma.05G151200/Glyma.05G180100/Glyma.14G152100/Glyma.04G240800/Glyma.20G060300/Glyma.02G051500/Glyma.14G042000/Glyma.07G149400/Glyma.11G035200/Glyma.02G034000/Glyma.07G161900…	35
0 h	00062	Fatty acid elongation	21/3538	46/14423	0.00141943	0.00736329	0.00527617	Glyma.18G011600/Glyma.14G074300/Glyma.11G245600/Glyma.17G251000/Glyma.08G279700/Glyma.05G011100/Glyma.01G207200/Glyma.03G260300/Glyma.04G149300/Glyma.18G146900/Glyma.06G058500/Glyma.20G115500/Glyma.18G011500/Glyma.04G057800/Glyma.20G210900/Glyma.10G179400/Glyma.08G261100/Glyma.10G274400/Glyma.10G001800/Glyma.10G291700/Glyma.02G001500	21
0 h	00565	Ether lipid metabolism	21/3538	46/14423	0.00141943	0.00736329	0.00527617	Glyma.07G080400/Glyma.18G064000/Glyma.04G033600/Glyma.07G080800/Glyma.15G152100/Glyma.05G168300/Glyma.01G215100/Glyma.06G169100/Glyma.06G061500/Glyma.06G033800/Glyma.02G093500/Glyma.19G132900/Glyma.11G178400/Glyma.03G130900/Glyma.02G190000/Glyma.18G288600/Glyma.16G081200/Glyma.13G364900/Glyma.03G092800/Glyma.06G020500/Glyma.18G265800	21
0 h	01004	Lipid biosynthesis proteins	53/3538	152/14423	0.0026412	0.013286	0.00952012	Glyma.18G011600/Glyma.04G204300/Glyma.19G107300/Glyma.04G033600/Glyma.11G122500/Glyma.02G203300/Glyma.03G056700/Glyma.10G249700/Glyma.09G195000/Glyma.19G147400/Glyma.07G080800/Glyma.11G245600/Glyma.06G220300/Glyma.03G008300/Glyma.11G254100/Glyma.19G233400/Glyma.17G120400/Glyma.18G246900/Glyma.07G205900/Glyma.13G085700/Glyma.20G143900/Glyma.11G017900/Glyma.14G077500/Glyma.03G144500/Glyma.08G279700…	53
0 h	00710	Carbon fixation in photosynthetic organisms	42/3538	116/14423	0.00320959	0.015512	0.0111151	Glyma.03G191500/Glyma.01G010200/Glyma.09G210900/Glyma.19G106800/Glyma.15G019300/Glyma.09G262900/Glyma.07G045900/Glyma.01G026700/Glyma.07G142700/Glyma.16G013900/Glyma.20G192200/Glyma.20G122500/Glyma.13G097100/Glyma.19G046600/Glyma.12G161300/Glyma.07G074700/Glyma.19G046800/Glyma.06G015900/Glyma.04G015900/Glyma.10G293500/Glyma.13G270400/Glyma.10G205500/Glyma.16G077800/Glyma.17G101700/Glyma.02G038100…	42
0 h	00940	Phenylpropanoid biosynthesis	101/3538	323/14423	0.0032706	0.015512	0.0111151	Glyma.14G045000/Glyma.02G272100/Glyma.10G262400/Glyma.04G227700/Glyma.09G156700/Glyma.10G058200/Glyma.20G128600/Glyma.18G103500/Glyma.19G013400/Glyma.11G176400/Glyma.19G113600/Glyma.09G002500/Glyma.03G070300/Glyma.10G060700/Glyma.20G114200/Glyma.20G026300/Glyma.07G263000/Glyma.14G205200/Glyma.13G369800/Glyma.15G001700/Glyma.06G263100/Glyma.01G232400/Glyma.03G122000/Glyma.10G209800/Glyma.11G049600…	101
0 h	00260	Glycine, serine and threonine metabolism	42/3538	119/14423	0.00542353	0.0250085	0.0179198	Glyma.06G178400/Glyma.16G147300/Glyma.12G085900/Glyma.08G282800/Glyma.19G102100/Glyma.01G026700/Glyma.17G132100/Glyma.07G081900/Glyma.17G228800/Glyma.14G184500/Glyma.08G108900/Glyma.05G180500/Glyma.06G107800/Glyma.09G270500/Glyma.17G012000/Glyma.01G129400/Glyma.03G250800/Glyma.15G012500/Glyma.02G038100/Glyma.18G150000/Glyma.13G087800/Glyma.06G186300/Glyma.05G050100/Glyma.08G302600/Glyma.14G094700…	42
0 h	00941	Flavonoid biosynthesis	32/3538	86/14423	0.00588705	0.0264122	0.0189257	Glyma.02G158700/Glyma.18G103500/Glyma.06G202300/Glyma.10G060700/Glyma.20G114200/Glyma.14G205200/Glyma.03G122000/Glyma.05G021800/Glyma.07G021600/Glyma.14G005700/Glyma.19G126000/Glyma.02G236500/Glyma.08G110460/Glyma.07G214700/Glyma.08G220200/Glyma.17G252200/Glyma.17G171100/Glyma.13G371000/Glyma.08G062000/Glyma.18G104000/Glyma.02G069100/Glyma.08G109500/Glyma.05G021900/Glyma.02G103500/Glyma.01G187700…	32
0 h	00460	Cyanoamino acid metabolism	32/3538	88/14423	0.00866177	0.0378383	0.027113	Glyma.14G045000/Glyma.02G272100/Glyma.18G021100/Glyma.11G180900/Glyma.11G176400/Glyma.14G184500/Glyma.19G113600/Glyma.08G108900/Glyma.06G107800/Glyma.20G026300/Glyma.12G092300/Glyma.06G263100/Glyma.17G161900/Glyma.18G150000/Glyma.02G018700/Glyma.19G113500/Glyma.12G054500/Glyma.11G130100/Glyma.13G343000/Glyma.07G126200/Glyma.11G197300/Glyma.08G274400/Glyma.11G197400/Glyma.15G106000/Glyma.12G222800…	32
4 h	00194	Photosynthesis proteins	75/3641	142/14423	1.58224e-12	2.3502e-10	1.74365e-10	Glyma.10G278900/Glyma.07G047600/Glyma.04G112800/Glyma.06G277600/Glyma.06G150300/Glyma.16G205200/Glyma.12G199400/Glyma.11G077600/Glyma.12G202500/Glyma.03G262300/Glyma.18G241700/Glyma.18G028400/Glyma.10G177200/Glyma.20G144700/Glyma.04G215800/Glyma.15G016300/Glyma.06G067400/Glyma.16G016100/Glyma.10G249000/Glyma.06G321900/Glyma.03G114600/Glyma.10G040600/Glyma.05G172300/Glyma.10G042100/Glyma.06G194900…	75
4 h	09159	Environmental adaptation	185/3641	467/14423	2.83157e-12	2.3502e-10	1.74365e-10	Glyma.06G223800/Glyma.17G039800/Glyma.15G048600/Glyma.07G058200/Glyma.08G360600/Glyma.18G166800/Glyma.05G123200/Glyma.05G198700/Glyma.17G163700/Glyma.02G138800/Glyma.11G072100/Glyma.11G113500/Glyma.06G103200/Glyma.04G203200/Glyma.15G055100/Glyma.17G102200/Glyma.17G251000/Glyma.11G018700/Glyma.03G084000/Glyma.06G196200/Glyma.06G320700/Glyma.14G074300/Glyma.04G175300/Glyma.18G263900/Glyma.05G011100…	185
4 h	04626	Plant-pathogen interaction	152/3641	368/14423	6.32784e-12	3.5014e-10	2.59774e-10	Glyma.06G223800/Glyma.17G039800/Glyma.15G048600/Glyma.08G360600/Glyma.18G166800/Glyma.05G123200/Glyma.05G198700/Glyma.02G138800/Glyma.11G072100/Glyma.11G113500/Glyma.04G203200/Glyma.15G055100/Glyma.17G251000/Glyma.03G084000/Glyma.06G320700/Glyma.14G074300/Glyma.04G175300/Glyma.18G263900/Glyma.05G011100/Glyma.08G078200/Glyma.12G039400/Glyma.19G068300/Glyma.08G177600/Glyma.04G188700/Glyma.13G106900…	152
4 h	00195	Photosynthesis	59/3641	108/14423	6.16718e-11	2.55938e-09	1.89884e-09	Glyma.10G278900/Glyma.04G112800/Glyma.06G150300/Glyma.12G199400/Glyma.11G077600/Glyma.12G202500/Glyma.18G241700/Glyma.20G144700/Glyma.04G215800/Glyma.15G016300/Glyma.06G067400/Glyma.10G249000/Glyma.06G321900/Glyma.03G114600/Glyma.10G040600/Glyma.05G172300/Glyma.10G042100/Glyma.13G129400/Glyma.07G019700/Glyma.15G107900/Glyma.15G194300/Glyma.08G126800/Glyma.10G042000/Glyma.06G020400/Glyma.04G020300…	59
4 h	99980	Enzymes with EC numbers	159/3641	402/14423	1.14139e-10	3.45605e-09	2.56409e-09	Glyma.19G175900/Glyma.19G239400/Glyma.09G015400/Glyma.04G093600/Glyma.05G138700/Glyma.19G061900/Glyma.08G268900/Glyma.04G189600/Glyma.02G049400/Glyma.08G299900/Glyma.08G149400/Glyma.15G100700/Glyma.04G166100/Glyma.08G210900/Glyma.08G089700/Glyma.18G244400/Glyma.13G113200/Glyma.07G174800/Glyma.20G031600/Glyma.01G013900/Glyma.14G023900/Glyma.09G008500/Glyma.08G315900/Glyma.13G096500/Glyma.11G220100…	159
4 h	09191	Unclassified: metabolism	163/3641	415/14423	1.24917e-10	3.45605e-09	2.56409e-09	Glyma.19G175900/Glyma.19G239400/Glyma.09G015400/Glyma.04G093600/Glyma.05G138700/Glyma.19G061900/Glyma.08G268900/Glyma.04G189600/Glyma.02G049400/Glyma.08G299900/Glyma.07G066700/Glyma.08G149400/Glyma.15G100700/Glyma.10G187300/Glyma.04G166100/Glyma.08G210900/Glyma.08G089700/Glyma.18G244400/Glyma.13G113200/Glyma.07G174800/Glyma.20G031600/Glyma.01G013900/Glyma.14G023900/Glyma.09G008500/Glyma.08G315900…	163
4 h	00630	Glyoxylate and dicarboxylate metabolism	57/3641	118/14423	5.01721e-08	1.1898e-06	8.82727e-07	Glyma.13G361400/Glyma.08G108900/Glyma.19G130800/Glyma.07G019900/Glyma.14G184500/Glyma.09G004700/Glyma.07G221300/Glyma.08G311200/Glyma.14G026400/Glyma.01G026700/Glyma.07G185400/Glyma.02G288500/Glyma.20G019600/Glyma.07G081900/Glyma.05G141400/Glyma.13G046200/Glyma.02G244000/Glyma.08G157700/Glyma.11G042200/Glyma.09G173200/Glyma.14G223500/Glyma.06G017900/Glyma.18G150000/Glyma.16G028700/Glyma.04G017500…	57
4 h	00053	Ascorbate and aldarate metabolism	38/3641	74/14423	1.23731e-06	2.56741e-05	1.9048e-05	Glyma.U031121/Glyma.13G057700/Glyma.17G091000/Glyma.19G061200/Glyma.11G150243/Glyma.12G073100/Glyma.02G292800/Glyma.06G068200/Glyma.06G183900/Glyma.10G162000/Glyma.05G022600/Glyma.11G078400/Glyma.02G051500/Glyma.14G152100/Glyma.06G114400/Glyma.19G028500/Glyma.20G224400/Glyma.18G265100/Glyma.04G009800/Glyma.13G076900/Glyma.01G031500/Glyma.12G032300/Glyma.17G077000/Glyma.16G073100/Glyma.11G107200/G…	38
4 h	00710	Carbon fixation in photosynthetic organisms	52/3641	116/14423	3.35885e-06	6.19521e-05	4.59632e-05	Glyma.16G168000/Glyma.03G191500/Glyma.07G045900/Glyma.05G025300/Glyma.16G013900/Glyma.07G182300/Glyma.10G268500/Glyma.03G246300/Glyma.12G161300/Glyma.10G059500/Glyma.19G243800/Glyma.07G074700/Glyma.13G270400/Glyma.09G210900/Glyma.18G030400/Glyma.20G192200/Glyma.01G026700/Glyma.16G044900/Glyma.07G185400/Glyma.08G067500/Glyma.10G205500/Glyma.07G142700/Glyma.19G106800/Glyma.01G010200/Glyma.13G046200…	52
4 h	99997	Function unknown	28/3641	51/14423	5.78104e-06	9.59653e-05	7.11981e-05	Glyma.08G019500/Glyma.13G310500/Glyma.12G026000/Glyma.20G249100/Glyma.01G161700/Glyma.13G107800/Glyma.05G213000/Glyma.11G082000/Glyma.11G131700/Glyma.17G051500/Glyma.03G066000/Glyma.16G205600/Glyma.08G300800/Glyma.13G111600/Glyma.06G293500/Glyma.17G054200/Glyma.17G002900/Glyma.12G191200/Glyma.08G022100/Glyma.20G247000/Glyma.20G164100/Glyma.10G177000/Glyma.11G110000/Glyma.12G036900/Glyma.20G213200…	28
4 h	04016	MAPK signaling pathway - plant	81/3641	208/14423	8.20458e-06	0.000123815	9.18599e-05	Glyma.15G048600/Glyma.17G211000/Glyma.20G221800/Glyma.05G123200/Glyma.13G076700/Glyma.05G198700/Glyma.03G216700/Glyma.02G138800/Glyma.04G203200/Glyma.20G009600/Glyma.13G041800/Glyma.08G078200/Glyma.02G208500/Glyma.19G068300/Glyma.14G145920/Glyma.16G009300/Glyma.05G132900/Glyma.02G135500/Glyma.20G051500/Glyma.13G076800/Glyma.17G178800/Glyma.05G066700/Glyma.06G162300/Glyma.17G052500/Glyma.19G121900…	81
4 h	00062	Fatty acid elongation	25/3641	46/14423	2.30179e-05	0.000318414	0.000236236	Glyma.09G260200/Glyma.17G251000/Glyma.14G074300/Glyma.18G011600/Glyma.05G011100/Glyma.02G273300/Glyma.01G207200/Glyma.18G232000/Glyma.11G245600/Glyma.06G058500/Glyma.03G260300/Glyma.08G279700/Glyma.20G115500/Glyma.18G146900/Glyma.18G011500/Glyma.04G057800/Glyma.08G261100/Glyma.15G042500/Glyma.11G144809/Glyma.10G179400/Glyma.20G210900/Glyma.10G001800/Glyma.10G291700/Glyma.10G274400/Glyma.02G001500	25
4 h	09194	Poorly characterized	31/3641	63/14423	3.47276e-05	0.000443445	0.000328998	Glyma.08G019500/Glyma.13G310500/Glyma.12G026000/Glyma.20G144800/Glyma.20G249100/Glyma.01G161700/Glyma.13G107800/Glyma.05G213000/Glyma.11G082000/Glyma.11G131700/Glyma.17G051500/Glyma.03G066000/Glyma.16G205600/Glyma.08G300800/Glyma.13G111600/Glyma.06G293500/Glyma.17G054200/Glyma.01G093200/Glyma.17G002900/Glyma.17G069700/Glyma.12G191200/Glyma.08G022100/Glyma.20G247000/Glyma.20G164100/Glyma.10G177000…	31
4 h	00903	Limonene and pinene degradation	13/3641	18/14423	3.78331e-05	0.000448593	0.000332818	Glyma.17G091000/Glyma.06G183900/Glyma.02G051500/Glyma.14G152100/Glyma.01G031500/Glyma.02G034000/Glyma.13G340000/Glyma.06G114300/Glyma.13G170600/Glyma.04G248500/Glyma.16G131700/Glyma.15G034400/Glyma.12G057400	13
4 h	00520	Amino sugar and nucleotide sugar metabolism	93/3641	258/14423	6.64478e-05	0.000690678	0.000512424	Glyma.06G030400/Glyma.11G015800/Glyma.19G038000/Glyma.03G159200/Glyma.18G208900/Glyma.11G223700/Glyma.09G280100/Glyma.08G309900/Glyma.09G262400/Glyma.17G257800/Glyma.08G086700/Glyma.04G159200/Glyma.10G045800/Glyma.10G032400/Glyma.09G030300/Glyma.05G222000/Glyma.01G139500/Glyma.01G063000/Glyma.20G153900/Glyma.11G141200/Glyma.03G006900/Glyma.10G018400/Glyma.06G205900/Glyma.18G229800/Glyma.09G017000…	93
4 h	04031	GTP-binding proteins	69/3641	180/14423	6.65714e-05	0.000690678	0.000512424	Glyma.06G023300/Glyma.15G122300/Glyma.11G040400/Glyma.02G094100/Glyma.11G241300/Glyma.06G070700/Glyma.12G212400/Glyma.04G069200/Glyma.04G069300/Glyma.01G202500/Glyma.16G001800/Glyma.15G040600/Glyma.05G064300/Glyma.17G146100/Glyma.18G251300/Glyma.17G151600/Glyma.10G178500/Glyma.11G178506/Glyma.11G135400/Glyma.02G244500/Glyma.20G211600/Glyma.12G044100/Glyma.13G208600/Glyma.02G289300/Glyma.13G146600…	69
4 h	00410	beta-Alanine metabolism	39/3641	89/14423	9.97915e-05	0.000974435	0.000722948	Glyma.07G183600/Glyma.15G055500/Glyma.18G116300/Glyma.03G117300/Glyma.08G307800/Glyma.09G168900/Glyma.17G091000/Glyma.09G227500/Glyma.16G080900/Glyma.06G183900/Glyma.02G051500/Glyma.14G152100/Glyma.18G109900/Glyma.18G043600/Glyma.01G031500/Glyma.05G180100/Glyma.10G090700/Glyma.08G303800/Glyma.11G035200/Glyma.16G218500/Glyma.02G038500/Glyma.02G034000/Glyma.14G211100/Glyma.02G278600/Glyma.20G145200…	39
4 h	09109	Metabolism of terpenoids and polyketides	107/3641	309/14423	0.000127578	0.00117656	0.000872904	Glyma.10G160500/Glyma.02G240200/Glyma.11G228900/Glyma.02G256800/Glyma.17G174500/Glyma.04G237000/Glyma.13G262200/Glyma.09G252800/Glyma.16G141700/Glyma.18G118100/Glyma.08G093400/Glyma.03G128900/Glyma.16G200200/Glyma.19G131400/Glyma.02G273100/Glyma.06G038700/Glyma.18G274400/Glyma.11G252500/Glyma.11G021400/Glyma.02G059000/Glyma.10G086700/Glyma.20G227900/Glyma.18G229700/Glyma.19G236200/Glyma.05G050500…	107
4 h	00591	Linoleic acid metabolism	23/3641	45/14423	0.000169215	0.00147841	0.00109685	Glyma.07G039900/Glyma.13G239000/Glyma.02G190000/Glyma.16G008700/Glyma.19G132900/Glyma.03G130900/Glyma.19G263300/Glyma.12G054700/Glyma.13G030300/Glyma.20G144600/Glyma.07G034900/Glyma.07G034800/Glyma.11G130200/Glyma.U039300/Glyma.15G026400/Glyma.10G249100/Glyma.07G007000/Glyma.15G026500/Glyma.03G264300/Glyma.07G006900/Glyma.11G130300/Glyma.07G196800/Glyma.13G347700	23
4 h	00906	Carotenoid biosynthesis	25/3641	51/14423	0.000210568	0.00174771	0.00129665	Glyma.10G160500/Glyma.02G240200/Glyma.17G174500/Glyma.09G252800/Glyma.03G128900/Glyma.19G131400/Glyma.11G252500/Glyma.10G086700/Glyma.20G227900/Glyma.10G231200/Glyma.15G172200/Glyma.08G306200/Glyma.02G143300/Glyma.14G045100/Glyma.11G151700/Glyma.18G239900/Glyma.09G066200/Glyma.01G154900/Glyma.14G209700/Glyma.09G000600/Glyma.02G104300/Glyma.19G160300/Glyma.01G073200/Glyma.08G176300/Glyma.11G161947	25
4 h	04146	Peroxisome	55/3641	142/14423	0.000256571	0.00202813	0.0015047	Glyma.15G109800/Glyma.17G089700/Glyma.03G250100/Glyma.10G249700/Glyma.19G128600/Glyma.17G225600/Glyma.08G160500/Glyma.11G122500/Glyma.03G018700/Glyma.08G237400/Glyma.04G076300/Glyma.20G077000/Glyma.17G009400/Glyma.13G346400/Glyma.15G266700/Glyma.15G083100/Glyma.20G004600/Glyma.20G143900/Glyma.05G151200/Glyma.03G119400/Glyma.15G213100/Glyma.19G236200/Glyma.10G124700/Glyma.09G281200/Glyma.14G211000…	55
4 h	00051	Fructose and mannose metabolism	48/3641	121/14423	0.000323728	0.00244267	0.00181226	Glyma.11G015800/Glyma.16G168000/Glyma.18G208900/Glyma.11G223700/Glyma.09G280100/Glyma.09G262400/Glyma.17G257800/Glyma.03G191500/Glyma.07G182300/Glyma.10G268500/Glyma.20G153900/Glyma.10G059500/Glyma.18G229800/Glyma.10G194300/Glyma.12G204700/Glyma.18G215600/Glyma.18G060600/Glyma.20G213300/Glyma.08G067500/Glyma.01G167500/Glyma.14G218800/Glyma.07G142700/Glyma.09G273500/Glyma.20G122500/Glyma.12G051800…	48
4 h	00280	Valine, leucine and isoleucine degradation	38/3641	91/14423	0.000401754	0.00289961	0.00215127	Glyma.05G063900/Glyma.19G128600/Glyma.07G183600/Glyma.07G213500/Glyma.08G204300/Glyma.20G077000/Glyma.01G196300/Glyma.10G028700/Glyma.16G200200/Glyma.06G120300/Glyma.03G117300/Glyma.08G307800/Glyma.10G124700/Glyma.01G129400/Glyma.17G091000/Glyma.17G132300/Glyma.02G131500/Glyma.16G080900/Glyma.01G103100/Glyma.06G183900/Glyma.07G235400/Glyma.02G051500/Glyma.14G152100/Glyma.11G154423/Glyma.18G109900…	38
4 h	00908	Zeatin biosynthesis	23/3641	48/14423	0.00056503	0.00390813	0.0028995	Glyma.18G274400/Glyma.04G055600/Glyma.10G062200/Glyma.11G149100/Glyma.08G365000/Glyma.12G011400/Glyma.03G134500/Glyma.14G099000/Glyma.18G297200/Glyma.20G116500/Glyma.03G186900/Glyma.03G151800/Glyma.10G025300/Glyma.03G187700/Glyma.19G187100/Glyma.15G103800/Glyma.15G170300/Glyma.19G187000/Glyma.09G063900/Glyma.02G148600/Glyma.09G225400/Glyma.19G135100/Glyma.03G187000	23
4 h	00592	alpha-Linolenic acid metabolism	39/3641	98/14423	0.00104838	0.00696123	0.00516464	Glyma.20G077000/Glyma.17G050000/Glyma.11G122700/Glyma.10G124700/Glyma.07G039900/Glyma.02G099200/Glyma.13G239000/Glyma.02G190000/Glyma.16G008700/Glyma.19G132900/Glyma.01G235600/Glyma.07G162900/Glyma.17G246500/Glyma.04G240800/Glyma.03G130900/Glyma.19G263300/Glyma.12G191400/Glyma.14G223200/Glyma.05G180100/Glyma.17G209900/Glyma.11G035200/Glyma.08G256600/Glyma.12G054700/Glyma.13G109700/Glyma.13G047300…	39
4 h	09106	Metabolism of other amino acids	118/3641	365/14423	0.00124864	0.00797211	0.00591463	Glyma.07G013800/Glyma.08G160500/Glyma.18G021100/Glyma.07G183600/Glyma.09G051200/Glyma.16G063200/Glyma.08G108900/Glyma.07G258700/Glyma.05G207100/Glyma.18G137100/Glyma.16G113100/Glyma.14G184500/Glyma.20G151500/Glyma.15G266700/Glyma.15G055500/Glyma.19G177200/Glyma.18G116300/Glyma.03G117300/Glyma.08G013900/Glyma.11G176400/Glyma.18G190300/Glyma.08G307800/Glyma.01G156600/Glyma.18G261600/Glyma.14G086300…	118
4 h	00260	Glycine, serine and threonine metabolism	44/3641	119/14423	0.00294267	0.018092	0.0134227	Glyma.13G361400/Glyma.08G108900/Glyma.13G049500/Glyma.04G076300/Glyma.07G019900/Glyma.14G184500/Glyma.09G004700/Glyma.07G221300/Glyma.05G080400/Glyma.01G026700/Glyma.17G132100/Glyma.09G270500/Glyma.01G129400/Glyma.20G019600/Glyma.07G081900/Glyma.11G042200/Glyma.18G150000/Glyma.03G250800/Glyma.15G016100/Glyma.06G186300/Glyma.14G094700/Glyma.01G199700/Glyma.02G038100/Glyma.17G012000/Glyma.13G087800…	44
4 h	00650	Butanoate metabolism	17/3641	36/14423	0.00351353	0.0208302	0.0154542	Glyma.19G128600/Glyma.11G096200/Glyma.16G200200/Glyma.09G168900/Glyma.17G132300/Glyma.16G028700/Glyma.07G235400/Glyma.18G043600/Glyma.06G254700/Glyma.07G059800/Glyma.20G043000/Glyma.14G036600/Glyma.16G218500/Glyma.14G211100/Glyma.02G277900/Glyma.11G213000/Glyma.08G091400	17
4 h	00561	Glycerolipid metabolism	43/3641	117/14423	0.0037082	0.0212262	0.0157481	Glyma.13G361400/Glyma.01G113000/Glyma.12G045700/Glyma.09G160400/Glyma.13G093100/Glyma.05G196100/Glyma.09G263300/Glyma.17G091000/Glyma.14G077500/Glyma.09G207900/Glyma.02G190000/Glyma.19G132900/Glyma.06G183900/Glyma.12G200100/Glyma.07G069700/Glyma.06G299200/Glyma.02G051500/Glyma.14G152100/Glyma.03G130900/Glyma.18G197600/Glyma.01G031500/Glyma.15G012500/Glyma.01G113200/Glyma.07G028600/Glyma.13G085700…	43
4 h	00199	Cytochrome P450	35/3641	92/14423	0.00443719	0.0245524	0.0182158	Glyma.11G228900/Glyma.02G256800/Glyma.09G252800/Glyma.06G202300/Glyma.07G110900/Glyma.11G122700/Glyma.20G114200/Glyma.14G059900/Glyma.11G067700/Glyma.07G162900/Glyma.17G246500/Glyma.14G205200/Glyma.08G365000/Glyma.17G118100/Glyma.03G122000/Glyma.18G239900/Glyma.12G191400/Glyma.02G236500/Glyma.13G217400/Glyma.19G126000/Glyma.11G074100/Glyma.16G089700/Glyma.16G149300/Glyma.05G021800/Glyma.19G162100…	35
4 h	04040	Ion channels	34/3641	89/14423	0.00462929	0.0247891	0.0183914	Glyma.06G223800/Glyma.08G082200/Glyma.13G308400/Glyma.18G263900/Glyma.11G048200/Glyma.12G204400/Glyma.13G161800/Glyma.06G126600/Glyma.12G099500/Glyma.01G193700/Glyma.14G161600/Glyma.05G077100/Glyma.07G056400/Glyma.13G324600/Glyma.03G257000/Glyma.19G221000/Glyma.19G255300/Glyma.05G029700/Glyma.13G296900/Glyma.01G157900/Glyma.02G299700/Glyma.06G077600/Glyma.08G241600/Glyma.14G014100/Glyma.11G087100…	34
4 h	00430	Taurine and hypotaurine metabolism	8/3641	13/14423	0.00600182	0.0310967	0.0230711	Glyma.18G021100/Glyma.09G168900/Glyma.18G043600/Glyma.16G218500/Glyma.07G126200/Glyma.14G211100/Glyma.11G213000/Glyma.08G091400	8
4 h	09108	Metabolism of cofactors and vitamins	138/3641	453/14423	0.00618188	0.0310967	0.0230711	Glyma.08G330200/Glyma.08G188200/Glyma.04G093600/Glyma.04G089800/Glyma.02G143700/Glyma.U031222/Glyma.18G099900/Glyma.14G150600/Glyma.01G238400/Glyma.04G177000/Glyma.10G048200/Glyma.06G159900/Glyma.08G108900/Glyma.13G154600/Glyma.08G194900/Glyma.01G196300/Glyma.05G197600/Glyma.19G115900/Glyma.14G154600/Glyma.14G184500/Glyma.09G004700/Glyma.03G212300/Glyma.08G157800/Glyma.19G123800/Glyma.08G005000/G…	138
4 h	00196	Photosynthesis - antenna proteins	15/3641	33/14423	0.00919671	0.0449016	0.0333132	Glyma.07G047600/Glyma.16G205200/Glyma.03G262300/Glyma.18G028400/Glyma.10G177200/Glyma.16G016100/Glyma.06G194900/Glyma.14G003400/Glyma.02G064700/Glyma.11G228800/Glyma.04G167900/Glyma.17G262400/Glyma.15G179400/Glyma.09G071400/Glyma.06G039700	15
8 h	01001	Protein kinases	191/3540	454/14423	6.15292e-17	1.02138e-14	7.44827e-15	Glyma.11G050000/Glyma.05G195300/Glyma.03G011000/Glyma.20G208900/Glyma.19G140800/Glyma.13G348100/Glyma.01G166400/Glyma.10G181500/Glyma.05G157200/Glyma.17G039800/Glyma.01G157800/Glyma.03G243500/Glyma.12G226300/Glyma.10G124200/Glyma.17G229100/Glyma.08G014100/Glyma.10G009100/Glyma.09G215000/Glyma.11G077000/Glyma.17G188300/Glyma.17G022800/Glyma.10G144600/Glyma.08G150000/Glyma.15G051600/Glyma.20G054500…	191
8 h	09159	Environmental adaptation	191/3540	467/14423	1.89768e-15	1.57507e-13	1.1486e-13	Glyma.11G050000/Glyma.09G056100/Glyma.17G062000/Glyma.20G090000/Glyma.19G140800/Glyma.10G048100/Glyma.17G039800/Glyma.17G231600/Glyma.10G009100/Glyma.15G051600/Glyma.20G054500/Glyma.07G051600/Glyma.14G006800/Glyma.17G118700/Glyma.08G180800/Glyma.02G124500/Glyma.04G157200/Glyma.13G106900/Glyma.17G175400/Glyma.06G196200/Glyma.19G260400/Glyma.01G224200/Glyma.03G084000/Glyma.11G077300/Glyma.06G223800…	191
8 h	04626	Plant-pathogen interaction	148/3540	368/14423	1.35953e-11	7.52271e-10	5.48581e-10	Glyma.19G140800/Glyma.17G039800/Glyma.10G009100/Glyma.15G051600/Glyma.20G054500/Glyma.07G051600/Glyma.14G006800/Glyma.17G118700/Glyma.08G180800/Glyma.02G124500/Glyma.04G157200/Glyma.13G106900/Glyma.17G175400/Glyma.03G084000/Glyma.11G077300/Glyma.06G223800/Glyma.17G052400/Glyma.01G068000/Glyma.14G165700/Glyma.03G138000/Glyma.09G224600/Glyma.05G245600/Glyma.06G320700/Glyma.08G360600/Glyma.08G078200…	148
8 h	99980	Enzymes with EC numbers	153/3540	402/14423	7.53782e-10	3.12819e-08	2.28118e-08	Glyma.13G163400/Glyma.13G348200/Glyma.09G015400/Glyma.07G189900/Glyma.06G160800/Glyma.06G196400/Glyma.03G069700/Glyma.09G008500/Glyma.07G174800/Glyma.03G242000/Glyma.19G239400/Glyma.03G175200/Glyma.13G069100/Glyma.12G205800/Glyma.06G175900/Glyma.04G093600/Glyma.08G139100/Glyma.19G115400/Glyma.17G125500/Glyma.19G136400/Glyma.04G095500/Glyma.14G182100/Glyma.20G019100/Glyma.10G022700/Glyma.08G324700…	153
8 h	09191	Unclassified: metabolism	154/3540	415/14423	5.18332e-09	1.72086e-07	1.25491e-07	Glyma.13G163400/Glyma.13G348200/Glyma.09G015400/Glyma.07G189900/Glyma.06G160800/Glyma.06G196400/Glyma.03G069700/Glyma.09G008500/Glyma.07G174800/Glyma.03G242000/Glyma.19G239400/Glyma.03G175200/Glyma.13G069100/Glyma.12G205800/Glyma.06G175900/Glyma.04G093600/Glyma.08G139100/Glyma.19G115400/Glyma.17G125500/Glyma.19G136400/Glyma.04G095500/Glyma.14G182100/Glyma.20G019100/Glyma.10G022700/Glyma.08G324700…	154
8 h	01003	Glycosyltransferases	121/3540	320/14423	6.86323e-08	1.89883e-06	1.38469e-06	Glyma.02G081000/Glyma.18G085200/Glyma.18G136200/Glyma.02G086200/Glyma.07G046500/Glyma.06G034800/Glyma.18G220200/Glyma.09G263300/Glyma.13G370500/Glyma.20G244900/Glyma.05G024800/Glyma.20G120300/Glyma.03G202100/Glyma.06G292500/Glyma.15G245800/Glyma.01G113000/Glyma.19G028100/Glyma.13G269200/Glyma.10G032400/Glyma.12G201500/Glyma.08G324900/Glyma.10G062200/Glyma.10G270800/Glyma.04G153700/Glyma.03G159200…	121
8 h	00053	Ascorbate and aldarate metabolism	39/3540	74/14423	1.69908e-07	4.02925e-06	2.93826e-06	Glyma.U031121/Glyma.17G091000/Glyma.14G021800/Glyma.18G092900/Glyma.06G183900/Glyma.19G244600/Glyma.11G150243/Glyma.19G061200/Glyma.04G009800/Glyma.13G057700/Glyma.06G068200/Glyma.12G032300/Glyma.18G265100/Glyma.10G162000/Glyma.05G224500/Glyma.13G076900/Glyma.02G051500/Glyma.17G077000/Glyma.02G292800/Glyma.06G114400/Glyma.16G073100/Glyma.07G266200/Glyma.20G224400/Glyma.14G152100/Glyma.11G107200/G…	39
8 h	00410	beta-Alanine metabolism	43/3540	89/14423	9.49168e-07	1.96952e-05	1.43624e-05	Glyma.11G209027/Glyma.09G168900/Glyma.15G055500/Glyma.17G091000/Glyma.08G282800/Glyma.08G307800/Glyma.02G282000/Glyma.03G117300/Glyma.14G032300/Glyma.08G276400/Glyma.06G183900/Glyma.09G007100/Glyma.15G111500/Glyma.16G080900/Glyma.18G116300/Glyma.06G178400/Glyma.18G109900/Glyma.16G218500/Glyma.02G051500/Glyma.09G227500/Glyma.11G035200/Glyma.14G152100/Glyma.01G062400/Glyma.14G036000/Glyma.18G043600…	43
8 h	00630	Glyoxylate and dicarboxylate metabolism	52/3540	118/14423	2.56618e-06	4.56611e-05	3.32976e-05	Glyma.02G244000/Glyma.08G108900/Glyma.07G185400/Glyma.01G026700/Glyma.14G223500/Glyma.14G026400/Glyma.15G016100/Glyma.06G052100/Glyma.09G015500/Glyma.17G228800/Glyma.13G308700/Glyma.12G098900/Glyma.05G141400/Glyma.07G081900/Glyma.09G173200/Glyma.12G193800/Glyma.19G046600/Glyma.04G017500/Glyma.17G012000/Glyma.15G012500/Glyma.15G250800/Glyma.08G157700/Glyma.03G128300/Glyma.14G184500/Glyma.06G017900…	52
8 h	04040	Ion channels	42/3540	89/14423	2.75067e-06	4.56611e-05	3.32976e-05	Glyma.06G016000/Glyma.04G157200/Glyma.13G308400/Glyma.06G223800/Glyma.01G193700/Glyma.12G194100/Glyma.13G308500/Glyma.16G218200/Glyma.16G111700/Glyma.09G168700/Glyma.18G263900/Glyma.12G099500/Glyma.14G161600/Glyma.19G221000/Glyma.02G299700/Glyma.09G197400/Glyma.12G204400/Glyma.06G126600/Glyma.13G161800/Glyma.09G168400/Glyma.14G014100/Glyma.04G174300/Glyma.05G077100/Glyma.07G022500/Glyma.07G056400…	42
8 h	00561	Glycerolipid metabolism	51/3540	117/14423	4.69369e-06	7.08321e-05	5.16531e-05	Glyma.06G039200/Glyma.09G263300/Glyma.17G091000/Glyma.03G202100/Glyma.01G113000/Glyma.17G077100/Glyma.19G132900/Glyma.06G220300/Glyma.06G183900/Glyma.09G160400/Glyma.19G175600/Glyma.13G085700/Glyma.12G045700/Glyma.13G093100/Glyma.15G012500/Glyma.18G197600/Glyma.02G051500/Glyma.13G101400/Glyma.13G134500/Glyma.03G008300/Glyma.05G196100/Glyma.03G130900/Glyma.09G207900/Glyma.10G046400/Glyma.14G077500…	51
8 h	00903	Limonene and pinene degradation	13/3540	18/14423	2.73524e-05	0.000361157	0.000263367	Glyma.17G091000/Glyma.06G183900/Glyma.02G051500/Glyma.14G152100/Glyma.01G031500/Glyma.13G170600/Glyma.02G034000/Glyma.06G114300/Glyma.16G131700/Glyma.13G340000/Glyma.04G248500/Glyma.12G057400/Glyma.15G034400	13
8 h	04712	Circadian rhythm - plant	43/3540	99/14423	2.82834e-05	0.000361157	0.000263367	Glyma.11G050000/Glyma.09G056100/Glyma.17G062000/Glyma.20G090000/Glyma.10G048100/Glyma.17G231600/Glyma.06G196200/Glyma.19G260400/Glyma.01G224200/Glyma.11G148362/Glyma.04G166300/Glyma.06G103200/Glyma.04G050200/Glyma.20G170000/Glyma.20G209900/Glyma.01G192100/Glyma.05G025000/Glyma.16G163200/Glyma.04G228300/Glyma.11G018700/Glyma.06G136600/Glyma.10G221500/Glyma.05G067100/Glyma.17G102200/Glyma.03G225000…	43
8 h	00591	Linoleic acid metabolism	24/3540	45/14423	3.0744e-05	0.000364536	0.000265831	Glyma.19G132900/Glyma.08G102900/Glyma.13G239000/Glyma.07G039900/Glyma.03G130900/Glyma.02G190000/Glyma.16G008700/Glyma.19G263300/Glyma.12G054700/Glyma.07G034800/Glyma.07G196800/Glyma.11G130200/Glyma.03G264300/Glyma.20G144600/Glyma.07G007000/Glyma.07G034900/Glyma.10G249100/Glyma.13G030300/Glyma.15G026400/Glyma.15G026500/Glyma.U039300/Glyma.11G130300/Glyma.07G006900/Glyma.13G347700	24
8 h	04070	Phosphatidylinositol signaling system	48/3540	115/14423	3.5333e-05	0.000372306	0.000271498	Glyma.05G191200/Glyma.04G088000/Glyma.06G152800/Glyma.08G156400/Glyma.10G060000/Glyma.04G213400/Glyma.07G045600/Glyma.06G096300/Glyma.17G077100/Glyma.04G030000/Glyma.14G059200/Glyma.18G027200/Glyma.08G186400/Glyma.15G046400/Glyma.07G216600/Glyma.10G183200/Glyma.06G109400/Glyma.04G009800/Glyma.08G127700/Glyma.04G253100/Glyma.11G230000/Glyma.13G065500/Glyma.20G013500/Glyma.18G255000/Glyma.13G093100…	48
8 h	04090	CD molecules	25/3540	48/14423	3.58849e-05	0.000372306	0.000271498	Glyma.10G290800/Glyma.06G128600/Glyma.02G094800/Glyma.03G183600/Glyma.13G029700/Glyma.18G286600/Glyma.01G047100/Glyma.04G236000/Glyma.09G206300/Glyma.18G021100/Glyma.01G016500/Glyma.08G342600/Glyma.02G107700/Glyma.19G184300/Glyma.10G137600/Glyma.02G008000/Glyma.08G028900/Glyma.08G270300/Glyma.19G016700/Glyma.13G119000/Glyma.17G259100/Glyma.03G224100/Glyma.19G016400/Glyma.14G220200/Glyma.19G016600	25
8 h	01009	Protein phosphatases and associated proteins	150/3540	460/14423	4.49498e-05	0.000438922	0.000320076	Glyma.15G022900/Glyma.10G243400/Glyma.15G139500/Glyma.06G039200/Glyma.09G034800/Glyma.03G185200/Glyma.11G140500/Glyma.15G129300/Glyma.09G023200/Glyma.08G195200/Glyma.09G083800/Glyma.13G274800/Glyma.02G170500/Glyma.19G082900/Glyma.04G059000/Glyma.07G148100/Glyma.09G037900/Glyma.02G257400/Glyma.15G236700/Glyma.14G101400/Glyma.15G143000/Glyma.06G088900/Glyma.18G279500/Glyma.19G077700/Glyma.16G114700…	150
8 h	04016	MAPK signaling pathway - plant	76/3540	208/14423	6.91215e-05	0.000637454	0.000464852	Glyma.10G058300/Glyma.07G056900/Glyma.15G051600/Glyma.12G241700/Glyma.08G180800/Glyma.14G223500/Glyma.03G191000/Glyma.13G151100/Glyma.03G216700/Glyma.14G165700/Glyma.20G009600/Glyma.19G191600/Glyma.02G165800/Glyma.08G078200/Glyma.14G108400/Glyma.13G041800/Glyma.02G135500/Glyma.05G066700/Glyma.09G002600/Glyma.01G204200/Glyma.05G198700/Glyma.13G076800/Glyma.13G145100/Glyma.17G218700/Glyma.20G051500…	76
8 h	00562	Inositol phosphate metabolism	44/3540	107/14423	0.000111553	0.000974625	0.000710728	Glyma.05G191200/Glyma.04G088000/Glyma.06G152800/Glyma.08G156400/Glyma.10G060000/Glyma.04G213400/Glyma.07G045600/Glyma.06G096300/Glyma.04G030000/Glyma.14G059200/Glyma.08G276400/Glyma.18G027200/Glyma.08G186400/Glyma.15G046400/Glyma.07G216600/Glyma.11G178400/Glyma.06G109400/Glyma.04G009800/Glyma.08G127700/Glyma.04G253100/Glyma.11G230000/Glyma.20G013500/Glyma.11G230100/Glyma.02G257200/Glyma.05G224500…	44
8 h	00520	Amino sugar and nucleotide sugar metabolism	88/3540	258/14423	0.000317855	0.0026382	0.00192386	Glyma.02G250800/Glyma.05G152300/Glyma.12G180300/Glyma.11G015800/Glyma.18G220200/Glyma.08G011800/Glyma.09G030300/Glyma.11G075700/Glyma.19G257700/Glyma.10G045800/Glyma.03G006900/Glyma.19G028100/Glyma.10G032400/Glyma.19G124500/Glyma.12G201500/Glyma.14G218800/Glyma.15G029800/Glyma.03G159200/Glyma.08G309900/Glyma.18G229800/Glyma.10G018400/Glyma.19G161500/Glyma.19G244600/Glyma.18G264700/Glyma.01G139500…	88
8 h	00564	Glycerophospholipid metabolism	62/3540	171/14423	0.000391123	0.00309173	0.00225459	Glyma.08G181200/Glyma.07G080400/Glyma.06G039200/Glyma.09G041400/Glyma.02G165500/Glyma.01G162100/Glyma.06G216800/Glyma.04G033600/Glyma.05G221700/Glyma.07G080800/Glyma.05G020500/Glyma.02G078500/Glyma.17G077100/Glyma.19G132900/Glyma.04G148300/Glyma.19G233400/Glyma.05G168300/Glyma.06G220300/Glyma.11G178400/Glyma.06G033800/Glyma.10G183200/Glyma.02G218700/Glyma.16G110900/Glyma.15G152100/Glyma.02G093500…	62
8 h	09109	Metabolism of terpenoids and polyketides	101/3540	309/14423	0.00067708	0.00510887	0.00372556	Glyma.04G069600/Glyma.12G173200/Glyma.03G128900/Glyma.02G256800/Glyma.09G252800/Glyma.04G237000/Glyma.19G251000/Glyma.13G326400/Glyma.02G240200/Glyma.17G091000/Glyma.13G262200/Glyma.15G093900/Glyma.04G055600/Glyma.08G365000/Glyma.10G062200/Glyma.02G272200/Glyma.11G027000/Glyma.18G118100/Glyma.18G274400/Glyma.15G172200/Glyma.02G273100/Glyma.18G111900/Glyma.11G151700/Glyma.06G183900/Glyma.17G132300…	101
8 h	00280	Valine, leucine and isoleucine degradation	36/3540	91/14423	0.00106079	0.00735165	0.00536107	Glyma.17G091000/Glyma.08G307800/Glyma.11G027000/Glyma.03G117300/Glyma.09G042000/Glyma.11G154423/Glyma.08G276400/Glyma.06G120300/Glyma.06G183900/Glyma.10G028700/Glyma.07G019100/Glyma.17G132300/Glyma.15G150900/Glyma.08G204300/Glyma.01G103100/Glyma.16G080900/Glyma.16G200200/Glyma.18G109900/Glyma.02G051500/Glyma.07G235400/Glyma.03G070200/Glyma.01G129400/Glyma.14G152100/Glyma.14G036600/Glyma.20G043000…	36
8 h	00906	Carotenoid biosynthesis	23/3540	51/14423	0.00106289	0.00735165	0.00536107	Glyma.03G128900/Glyma.09G252800/Glyma.19G251000/Glyma.02G240200/Glyma.02G272200/Glyma.15G172200/Glyma.18G111900/Glyma.11G151700/Glyma.20G227900/Glyma.10G086700/Glyma.13G147500/Glyma.17G174500/Glyma.18G239900/Glyma.14G045100/Glyma.08G306200/Glyma.01G154900/Glyma.09G066200/Glyma.14G209700/Glyma.09G000600/Glyma.19G160300/Glyma.02G104300/Glyma.11G161947/Glyma.08G176300	23
8 h	00062	Fatty acid elongation	21/3540	46/14423	0.00143039	0.00949777	0.00692608	Glyma.09G260200/Glyma.17G118700/Glyma.11G245600/Glyma.05G011100/Glyma.03G260300/Glyma.08G279700/Glyma.01G207200/Glyma.18G011500/Glyma.06G058500/Glyma.18G146900/Glyma.20G115500/Glyma.15G042500/Glyma.04G057800/Glyma.08G261100/Glyma.11G144809/Glyma.10G179400/Glyma.10G291700/Glyma.10G274400/Glyma.20G210900/Glyma.02G001500/Glyma.10G001800	21
8 h	00945	Stilbenoid, diarylheptanoid and gingerol biosynthesis	18/3540	38/14423	0.00184268	0.0117648	0.00857926	Glyma.18G103500/Glyma.14G205200/Glyma.03G122000/Glyma.02G236500/Glyma.19G126000/Glyma.07G214700/Glyma.07G021600/Glyma.08G220200/Glyma.02G103500/Glyma.10G060700/Glyma.18G104000/Glyma.13G371000/Glyma.17G171100/Glyma.02G069100/Glyma.01G187700/Glyma.11G054500/Glyma.08G311500/Glyma.18G113100	18
8 h	02010	ABC transporters	21/3540	48/14423	0.00273662	0.0162243	0.0118313	Glyma.10G290800/Glyma.02G094800/Glyma.03G183600/Glyma.18G286600/Glyma.03G136000/Glyma.20G165000/Glyma.09G206300/Glyma.01G016500/Glyma.08G342600/Glyma.19G184300/Glyma.10G137600/Glyma.16G172500/Glyma.02G008000/Glyma.08G270300/Glyma.19G016700/Glyma.13G119000/Glyma.17G259100/Glyma.03G224100/Glyma.19G016400/Glyma.14G220200/Glyma.19G016600	21
8 h	09131	Membrane transport	21/3540	48/14423	0.00273662	0.0162243	0.0118313	Glyma.10G290800/Glyma.02G094800/Glyma.03G183600/Glyma.18G286600/Glyma.03G136000/Glyma.20G165000/Glyma.09G206300/Glyma.01G016500/Glyma.08G342600/Glyma.19G184300/Glyma.10G137600/Glyma.16G172500/Glyma.02G008000/Glyma.08G270300/Glyma.19G016700/Glyma.13G119000/Glyma.17G259100/Glyma.03G224100/Glyma.19G016400/Glyma.14G220200/Glyma.19G016600	21
8 h	00260	Glycine, serine and threonine metabolism	43/3540	119/14423	0.00305059	0.017462	0.0127338	Glyma.16G147300/Glyma.08G108900/Glyma.01G026700/Glyma.08G282800/Glyma.12G085900/Glyma.09G270500/Glyma.15G016100/Glyma.17G057700/Glyma.06G052100/Glyma.17G228800/Glyma.03G250800/Glyma.07G081900/Glyma.06G178400/Glyma.17G012000/Glyma.19G102100/Glyma.15G012500/Glyma.14G184500/Glyma.02G038100/Glyma.06G186300/Glyma.01G129400/Glyma.07G082100/Glyma.01G062400/Glyma.08G302600/Glyma.18G150000/Glyma.14G094700…	43
8 h	00710	Carbon fixation in photosynthetic organisms	42/3540	116/14423	0.00324524	0.017957	0.0130948	Glyma.20G122500/Glyma.11G111400/Glyma.09G262900/Glyma.07G185400/Glyma.01G026700/Glyma.16G013900/Glyma.06G091500/Glyma.01G010200/Glyma.09G210900/Glyma.07G142700/Glyma.20G192200/Glyma.15G019300/Glyma.06G087800/Glyma.12G161300/Glyma.13G270400/Glyma.19G046600/Glyma.20G125200/Glyma.10G205500/Glyma.16G077800/Glyma.07G074700/Glyma.04G015900/Glyma.06G015900/Glyma.08G182300/Glyma.19G046800/Glyma.10G293500…	42
8 h	00565	Ether lipid metabolism	20/3540	46/14423	0.00373535	0.0200022	0.0145863	Glyma.07G080400/Glyma.09G041400/Glyma.01G162100/Glyma.04G033600/Glyma.07G080800/Glyma.19G132900/Glyma.05G168300/Glyma.11G178400/Glyma.06G033800/Glyma.15G152100/Glyma.02G093500/Glyma.06G061500/Glyma.03G130900/Glyma.02G190000/Glyma.16G081200/Glyma.20G238000/Glyma.18G288600/Glyma.13G364900/Glyma.03G092800/Glyma.06G020500	20
8 h	00500	Starch and sucrose metabolism	76/3540	235/14423	0.00396646	0.020576	0.0150047	Glyma.08G334000/Glyma.18G136200/Glyma.02G086200/Glyma.16G217900/Glyma.11G015800/Glyma.08G244900/Glyma.07G258600/Glyma.03G192300/Glyma.20G120300/Glyma.05G219200/Glyma.08G025500/Glyma.18G232400/Glyma.08G028400/Glyma.10G270800/Glyma.02G018700/Glyma.14G218800/Glyma.12G005200/Glyma.15G029800/Glyma.17G242400/Glyma.06G129400/Glyma.19G113600/Glyma.06G323700/Glyma.13G161600/Glyma.05G179800/Glyma.11G127200…	76
8 h	00330	Arginine and proline metabolism	41/3540	115/14423	0.00492944	0.0247966	0.0180825	Glyma.11G209027/Glyma.17G021200/Glyma.20G248500/Glyma.17G091000/Glyma.18G137100/Glyma.17G163900/Glyma.18G278800/Glyma.02G282000/Glyma.09G224600/Glyma.14G032300/Glyma.06G183900/Glyma.10G297300/Glyma.02G128000/Glyma.18G116300/Glyma.03G069400/Glyma.10G259100/Glyma.02G051500/Glyma.09G227500/Glyma.06G007500/Glyma.17G092400/Glyma.14G152100/Glyma.05G029100/Glyma.17G020300/Glyma.08G303800/Glyma.20G132000…	41
8 h	09106	Metabolism of other amino acids	111/3540	365/14423	0.00575193	0.0274552	0.0200212	Glyma.11G180900/Glyma.19G154100/Glyma.11G209027/Glyma.07G013800/Glyma.11G088200/Glyma.01G156600/Glyma.09G168900/Glyma.08G108900/Glyma.02G187200/Glyma.15G055500/Glyma.16G063200/Glyma.12G163700/Glyma.17G091000/Glyma.08G282800/Glyma.07G258600/Glyma.05G221700/Glyma.18G137100/Glyma.16G113100/Glyma.05G005300/Glyma.14G211000/Glyma.08G307800/Glyma.02G282000/Glyma.16G038300/Glyma.02G241200/Glyma.16G000200…	111
8 h	00910	Nitrogen metabolism	24/3540	60/14423	0.00578874	0.0274552	0.0200212	Glyma.02G244000/Glyma.08G196200/Glyma.02G132100/Glyma.07G012500/Glyma.04G236900/Glyma.09G173200/Glyma.16G041200/Glyma.03G128300/Glyma.17G161900/Glyma.13G257200/Glyma.19G130800/Glyma.18G041100/Glyma.11G215500/Glyma.03G133600/Glyma.10G059400/Glyma.18G141900/Glyma.13G210800/Glyma.15G057700/Glyma.15G102000/Glyma.02G213700/Glyma.18G138400/Glyma.06G109200/Glyma.19G007700/Glyma.05G007100	24
8 h	00908	Zeatin biosynthesis	20/3540	48/14423	0.00665904	0.0307056	0.0223915	Glyma.04G055600/Glyma.08G365000/Glyma.10G062200/Glyma.18G274400/Glyma.19G187500/Glyma.02G148600/Glyma.03G151800/Glyma.18G297200/Glyma.14G099000/Glyma.20G116500/Glyma.15G103800/Glyma.09G225400/Glyma.03G186900/Glyma.09G063900/Glyma.03G187700/Glyma.10G025300/Glyma.15G170300/Glyma.19G187100/Glyma.03G187000/Glyma.19G187000	20
8 h	00770	Pantothenate and CoA biosynthesis	29/3540	77/14423	0.00706299	0.031688	0.0231079	Glyma.11G209027/Glyma.06G182100/Glyma.15G055500/Glyma.17G091000/Glyma.02G282000/Glyma.15G117500/Glyma.14G032300/Glyma.13G154600/Glyma.06G183900/Glyma.18G116300/Glyma.08G285700/Glyma.18G139100/Glyma.02G051500/Glyma.01G173050/Glyma.14G152100/Glyma.14G036000/Glyma.08G028900/Glyma.02G278600/Glyma.08G303800/Glyma.01G031500/Glyma.13G170600/Glyma.02G034000/Glyma.06G114300/Glyma.14G209400/Glyma.16G131700…	29
8 h	01004	Lipid biosynthesis proteins	51/3540	152/14423	0.00753164	0.0329014	0.0239928	Glyma.09G260200/Glyma.11G122500/Glyma.03G056700/Glyma.04G033600/Glyma.17G120400/Glyma.07G080800/Glyma.11G245600/Glyma.10G249700/Glyma.03G021000/Glyma.02G139600/Glyma.16G042000/Glyma.11G254100/Glyma.18G246900/Glyma.19G233400/Glyma.06G220300/Glyma.06G033800/Glyma.19G147400/Glyma.11G017900/Glyma.16G110900/Glyma.20G143900/Glyma.07G151300/Glyma.13G085700/Glyma.12G045700/Glyma.01G120400/Glyma.05G218600…	51
8 h	00199	Cytochrome P450	33/3540	92/14423	0.00983989	0.0418826	0.0305422	Glyma.02G256800/Glyma.09G252800/Glyma.11G122700/Glyma.07G162900/Glyma.07G110900/Glyma.08G365000/Glyma.17G246500/Glyma.19G162100/Glyma.13G147500/Glyma.13G217400/Glyma.14G205200/Glyma.03G122000/Glyma.06G202300/Glyma.18G239900/Glyma.02G236500/Glyma.19G126000/Glyma.11G074100/Glyma.01G175500/Glyma.04G030100/Glyma.12G191400/Glyma.05G208900/Glyma.18G297200/Glyma.16G149300/Glyma.11G175900/Glyma.20G065100…	33
8 h	00071	Fatty acid degradation	32/3540	89/14423	0.0104974	0.0435643	0.0317685	Glyma.11G122500/Glyma.17G091000/Glyma.10G249700/Glyma.09G161600/Glyma.09G042000/Glyma.11G254100/Glyma.14G156400/Glyma.06G183900/Glyma.15G150900/Glyma.11G017900/Glyma.20G143900/Glyma.02G051500/Glyma.20G060300/Glyma.11G035200/Glyma.14G152100/Glyma.05G151200/Glyma.12G015300/Glyma.14G042000/Glyma.01G031500/Glyma.13G170600/Glyma.07G149400/Glyma.11G175900/Glyma.02G034000/Glyma.19G218300/Glyma.06G114300…	32
12 h	09159	Environmental adaptation	173/3440	467/14423	6.15138e-11	1.02728e-08	7.57592e-09	Glyma.02G048300/Glyma.06G103200/Glyma.15G051600/Glyma.17G231600/Glyma.11G148362/Glyma.17G039800/Glyma.06G223800/Glyma.07G051600/Glyma.11G077300/Glyma.20G054500/Glyma.01G166100/Glyma.17G251000/Glyma.10G009100/Glyma.05G245600/Glyma.11G018700/Glyma.04G166300/Glyma.11G050000/Glyma.06G320700/Glyma.13G106900/Glyma.06G196200/Glyma.14G006800/Glyma.16G218200/Glyma.07G003200/Glyma.04G050200/Glyma.20G209900…	173
12 h	99980	Enzymes with EC numbers	151/3440	402/14423	3.30965e-10	2.76356e-08	2.03805e-08	Glyma.12G205800/Glyma.04G078900/Glyma.16G073600/Glyma.10G022700/Glyma.05G015400/Glyma.15G056800/Glyma.04G189600/Glyma.19G013800/Glyma.03G069700/Glyma.08G059300/Glyma.04G093600/Glyma.18G097000/Glyma.12G049500/Glyma.15G061100/Glyma.09G015400/Glyma.07G228300/Glyma.08G210900/Glyma.19G061900/Glyma.08G149400/Glyma.20G031600/Glyma.06G175900/Glyma.07G174800/Glyma.09G008500/Glyma.14G182100/Glyma.04G045400…	151
12 h	09191	Unclassified: metabolism	154/3440	415/14423	6.10916e-10	3.40076e-08	2.50797e-08	Glyma.12G205800/Glyma.04G078900/Glyma.16G073600/Glyma.10G022700/Glyma.05G015400/Glyma.15G056800/Glyma.04G189600/Glyma.19G013800/Glyma.03G069700/Glyma.08G059300/Glyma.04G093600/Glyma.18G097000/Glyma.12G049500/Glyma.15G061100/Glyma.09G015400/Glyma.07G228300/Glyma.08G210900/Glyma.07G066700/Glyma.19G061900/Glyma.08G149400/Glyma.20G031600/Glyma.06G175900/Glyma.07G174800/Glyma.09G008500/Glyma.17G052700…	154
12 h	04626	Plant-pathogen interaction	137/3440	368/14423	4.28488e-09	1.78894e-07	1.31929e-07	Glyma.02G048300/Glyma.15G051600/Glyma.17G039800/Glyma.06G223800/Glyma.07G051600/Glyma.11G077300/Glyma.20G054500/Glyma.01G166100/Glyma.17G251000/Glyma.10G009100/Glyma.05G245600/Glyma.06G320700/Glyma.13G106900/Glyma.14G006800/Glyma.16G218200/Glyma.07G003200/Glyma.11G072100/Glyma.08G078200/Glyma.04G203200/Glyma.08G360600/Glyma.16G099600/Glyma.05G123200/Glyma.06G189600/Glyma.05G198700/Glyma.18G263900…	137
12 h	00630	Glyoxylate and dicarboxylate metabolism	54/3440	118/14423	1.42129e-07	4.7471e-06	3.50086e-06	Glyma.09G004700/Glyma.13G308700/Glyma.07G185400/Glyma.01G026700/Glyma.14G223500/Glyma.12G193800/Glyma.13G097100/Glyma.14G026400/Glyma.15G016100/Glyma.04G017500/Glyma.03G128300/Glyma.05G141400/Glyma.14G184500/Glyma.06G017900/Glyma.12G098900/Glyma.18G041100/Glyma.09G015500/Glyma.02G244000/Glyma.19G130800/Glyma.07G081900/Glyma.09G247900/Glyma.15G012500/Glyma.08G097300/Glyma.08G157700/Glyma.14G094700…	54
12 h	01003	Glycosyltransferases	113/3440	320/14423	2.06924e-06	5.75937e-05	4.24738e-05	Glyma.16G201600/Glyma.02G131900/Glyma.15G210100/Glyma.05G024800/Glyma.08G324800/Glyma.12G201500/Glyma.13G058100/Glyma.08G127200/Glyma.05G086900/Glyma.02G100600/Glyma.18G274400/Glyma.10G128800/Glyma.07G081600/Glyma.06G129400/Glyma.06G240600/Glyma.18G085200/Glyma.02G080900/Glyma.06G034800/Glyma.09G263300/Glyma.19G038000/Glyma.08G324900/Glyma.01G113000/Glyma.10G032400/Glyma.04G159200/Glyma.09G017000…	113
12 h	04016	MAPK signaling pathway - plant	78/3440	208/14423	6.55598e-06	0.000140009	0.000103252	Glyma.04G147000/Glyma.13G076700/Glyma.16G025900/Glyma.15G051600/Glyma.03G181400/Glyma.19G191600/Glyma.08G188300/Glyma.07G056900/Glyma.14G066400/Glyma.17G178800/Glyma.13G151100/Glyma.16G009300/Glyma.02G250200/Glyma.02G165800/Glyma.03G216700/Glyma.14G223500/Glyma.14G108400/Glyma.13G229300/Glyma.07G003200/Glyma.20G009600/Glyma.13G145100/Glyma.09G002600/Glyma.08G078200/Glyma.04G203200/Glyma.05G123200…	78
12 h	01001	Protein kinases	149/3440	454/14423	6.707e-06	0.000140009	0.000103252	Glyma.05G195300/Glyma.13G215200/Glyma.07G125200/Glyma.02G180100/Glyma.16G158700/Glyma.02G048300/Glyma.18G240600/Glyma.15G269800/Glyma.15G051600/Glyma.17G039800/Glyma.03G243500/Glyma.10G038400/Glyma.03G011000/Glyma.09G252000/Glyma.07G051600/Glyma.04G029700/Glyma.12G226300/Glyma.11G077300/Glyma.13G105900/Glyma.09G256000/Glyma.20G054500/Glyma.03G069800/Glyma.01G166100/Glyma.05G157200/Glyma.05G244600…	149
12 h	00053	Ascorbate and aldarate metabolism	35/3440	74/14423	8.77466e-06	0.000162819	0.000120074	Glyma.17G091000/Glyma.18G092900/Glyma.07G013900/Glyma.06G183900/Glyma.11G150243/Glyma.06G068200/Glyma.17G077000/Glyma.02G292800/Glyma.19G061200/Glyma.13G057700/Glyma.04G009800/Glyma.10G162000/Glyma.20G224400/Glyma.18G265100/Glyma.12G032300/Glyma.05G022600/Glyma.06G114400/Glyma.14G152100/Glyma.19G028500/Glyma.13G076900/Glyma.11G107200/Glyma.16G073100/Glyma.01G031500/Glyma.02G051500/Glyma.06G114300…	35
12 h	00591	Linoleic acid metabolism	24/3440	45/14423	1.84507e-05	0.000297954	0.000219733	Glyma.07G039900/Glyma.08G102900/Glyma.19G132900/Glyma.13G239000/Glyma.03G130900/Glyma.16G008700/Glyma.19G263300/Glyma.12G054700/Glyma.02G190000/Glyma.07G034800/Glyma.11G130200/Glyma.10G249100/Glyma.07G007000/Glyma.15G026400/Glyma.U039300/Glyma.07G034900/Glyma.20G144600/Glyma.13G030300/Glyma.15G026500/Glyma.11G130300/Glyma.03G264300/Glyma.07G196800/Glyma.13G347700/Glyma.07G006900	24
12 h	00903	Limonene and pinene degradation	13/3440	18/14423	1.96257e-05	0.000297954	0.000219733	Glyma.17G091000/Glyma.06G183900/Glyma.14G152100/Glyma.01G031500/Glyma.02G051500/Glyma.06G114300/Glyma.02G034000/Glyma.13G170600/Glyma.16G131700/Glyma.13G340000/Glyma.04G248500/Glyma.12G057400/Glyma.15G034400	13
12 h	00410	beta-Alanine metabolism	39/3440	89/14423	2.59138e-05	0.000351658	0.000259338	Glyma.08G276400/Glyma.14G032300/Glyma.06G178400/Glyma.15G055500/Glyma.15G111500/Glyma.17G091000/Glyma.18G116300/Glyma.09G168900/Glyma.03G117300/Glyma.06G183900/Glyma.05G180100/Glyma.09G007100/Glyma.08G307800/Glyma.16G080900/Glyma.18G109900/Glyma.09G227500/Glyma.16G218500/Glyma.11G035200/Glyma.14G152100/Glyma.02G278600/Glyma.18G043600/Glyma.14G211100/Glyma.01G031500/Glyma.02G051500/Glyma.08G303800…	39
12 h	00561	Glycerolipid metabolism	48/3440	117/14423	2.73746e-05	0.000351658	0.000259338	Glyma.17G077100/Glyma.09G263300/Glyma.17G091000/Glyma.01G113000/Glyma.13G134500/Glyma.06G183900/Glyma.06G220300/Glyma.13G093100/Glyma.10G046400/Glyma.05G196100/Glyma.18G197600/Glyma.13G101400/Glyma.17G248200/Glyma.19G132900/Glyma.13G085700/Glyma.15G012500/Glyma.14G077500/Glyma.09G160400/Glyma.03G008300/Glyma.09G207900/Glyma.03G130900/Glyma.14G152100/Glyma.06G299200/Glyma.07G069700/Glyma.07G028600…	48
12 h	99997	Function unknown	25/3440	51/14423	7.92787e-05	0.000945682	0.000697414	Glyma.12G026000/Glyma.13G310500/Glyma.07G271000/Glyma.13G107800/Glyma.06G293500/Glyma.05G213000/Glyma.13G111600/Glyma.03G066000/Glyma.01G161700/Glyma.08G019500/Glyma.17G054200/Glyma.17G051500/Glyma.12G191200/Glyma.11G131700/Glyma.17G045900/Glyma.11G082000/Glyma.20G213200/Glyma.10G177000/Glyma.17G002900/Glyma.20G247000/Glyma.20G164100/Glyma.11G110000/Glyma.12G036900/Glyma.10G229000/Glyma.07G273000	25
12 h	00062	Fatty acid elongation	22/3440	46/14423	0.000328796	0.00365137	0.00269278	Glyma.02G273300/Glyma.18G232000/Glyma.17G251000/Glyma.11G245600/Glyma.05G011100/Glyma.08G279700/Glyma.01G207200/Glyma.03G260300/Glyma.18G146900/Glyma.18G011500/Glyma.08G261100/Glyma.20G115500/Glyma.06G058500/Glyma.15G042500/Glyma.04G057800/Glyma.11G144809/Glyma.10G179400/Glyma.20G210900/Glyma.10G274400/Glyma.02G001500/Glyma.10G291700/Glyma.10G001800	22
12 h	00199	Cytochrome P450	37/3440	92/14423	0.000349832	0.00365137	0.00269278	Glyma.14G059900/Glyma.07G110900/Glyma.13G147500/Glyma.11G122700/Glyma.09G252800/Glyma.19G033900/Glyma.14G205200/Glyma.11G228900/Glyma.03G122000/Glyma.19G126000/Glyma.19G162100/Glyma.13G217400/Glyma.17G246500/Glyma.02G236500/Glyma.05G021800/Glyma.08G365000/Glyma.18G239900/Glyma.05G208900/Glyma.12G191400/Glyma.17G118100/Glyma.11G074100/Glyma.06G202300/Glyma.04G030100/Glyma.16G149300/Glyma.10G202400…	37
12 h	09108	Metabolism of cofactors and vitamins	138/3440	453/14423	0.00063939	0.00618638	0.00456229	Glyma.18G158900/Glyma.06G091600/Glyma.15G025600/Glyma.07G188200/Glyma.06G084100/Glyma.09G004700/Glyma.12G020100/Glyma.08G029600/Glyma.04G254600/Glyma.06G316900/Glyma.05G001000/Glyma.01G238400/Glyma.14G032300/Glyma.04G093600/Glyma.15G055500/Glyma.15G087200/Glyma.11G235400/Glyma.20G179400/Glyma.10G112700/Glyma.19G115900/Glyma.04G177000/Glyma.17G091000/Glyma.04G089800/Glyma.04G249400/Glyma.03G060100…	138
12 h	09194	Poorly characterized	27/3440	63/14423	0.000666796	0.00618638	0.00456229	Glyma.12G026000/Glyma.13G310500/Glyma.07G271000/Glyma.13G107800/Glyma.06G293500/Glyma.05G213000/Glyma.13G111600/Glyma.03G066000/Glyma.01G161700/Glyma.08G019500/Glyma.17G054200/Glyma.17G051500/Glyma.12G191200/Glyma.17G069700/Glyma.11G131700/Glyma.17G045900/Glyma.11G082000/Glyma.01G093200/Glyma.20G213200/Glyma.10G177000/Glyma.17G002900/Glyma.20G247000/Glyma.20G164100/Glyma.11G110000/Glyma.12G036900…	27
12 h	04040	Ion channels	35/3440	89/14423	0.000811894	0.00713612	0.00526269	Glyma.13G308500/Glyma.01G193700/Glyma.06G223800/Glyma.16G218200/Glyma.18G263900/Glyma.16G111700/Glyma.09G168700/Glyma.10G053900/Glyma.14G161600/Glyma.06G126600/Glyma.12G204400/Glyma.13G324600/Glyma.09G197400/Glyma.13G161800/Glyma.12G099500/Glyma.07G056400/Glyma.05G077100/Glyma.19G255300/Glyma.02G299700/Glyma.14G014100/Glyma.13G296900/Glyma.03G257000/Glyma.16G208400/Glyma.19G221000/Glyma.01G157900…	35
12 h	01009	Protein phosphatases and associated proteins	139/3440	460/14423	0.000882136	0.00736583	0.0054321	Glyma.17G097500/Glyma.15G129300/Glyma.09G023200/Glyma.01G219800/Glyma.04G059000/Glyma.15G139500/Glyma.08G195200/Glyma.19G077700/Glyma.14G101400/Glyma.08G029600/Glyma.03G185200/Glyma.14G049600/Glyma.10G058900/Glyma.04G101400/Glyma.15G125500/Glyma.08G257900/Glyma.20G228000/Glyma.19G082900/Glyma.14G017800/Glyma.13G274800/Glyma.17G120300/Glyma.05G152000/Glyma.02G295600/Glyma.13G002100/Glyma.17G221100…	139
12 h	00280	Valine, leucine and isoleucine degradation	35/3440	91/14423	0.00129284	0.0102162	0.00753417	Glyma.08G276400/Glyma.12G071100/Glyma.09G042000/Glyma.07G019100/Glyma.08G204300/Glyma.17G091000/Glyma.06G120300/Glyma.10G028700/Glyma.03G117300/Glyma.06G183900/Glyma.11G154423/Glyma.15G150900/Glyma.08G307800/Glyma.17G132300/Glyma.01G103100/Glyma.16G080900/Glyma.03G070200/Glyma.18G109900/Glyma.14G152100/Glyma.07G235400/Glyma.20G043000/Glyma.01G031500/Glyma.01G129400/Glyma.02G051500/Glyma.06G050100…	35
12 h	00520	Amino sugar and nucleotide sugar metabolism	83/3440	258/14423	0.00134585	0.0102162	0.00753417	Glyma.12G201500/Glyma.13G058100/Glyma.03G006900/Glyma.19G124500/Glyma.10G045800/Glyma.07G081600/Glyma.12G180300/Glyma.09G030300/Glyma.06G030400/Glyma.19G038000/Glyma.10G032400/Glyma.04G159200/Glyma.11G141300/Glyma.09G017000/Glyma.11G075700/Glyma.19G028100/Glyma.10G018400/Glyma.14G218800/Glyma.08G309900/Glyma.01G139500/Glyma.03G159200/Glyma.08G348000/Glyma.15G051500/Glyma.06G205900/Glyma.19G161500…	83
12 h	00330	Arginine and proline metabolism	42/3440	115/14423	0.00151255	0.0109824	0.00809923	Glyma.17G083400/Glyma.20G248500/Glyma.04G007700/Glyma.14G032300/Glyma.07G253200/Glyma.05G141900/Glyma.17G163900/Glyma.17G091000/Glyma.05G104400/Glyma.18G116300/Glyma.08G288100/Glyma.18G137100/Glyma.17G021200/Glyma.06G183900/Glyma.18G278800/Glyma.02G128000/Glyma.10G297300/Glyma.09G227500/Glyma.06G007500/Glyma.17G092400/Glyma.14G152100/Glyma.01G099800/Glyma.18G188000/Glyma.01G031500/Glyma.05G029200…	42
12 h	00071	Fatty acid degradation	34/3440	89/14423	0.00172144	0.0119783	0.00883369	Glyma.11G254100/Glyma.09G042000/Glyma.04G240800/Glyma.17G091000/Glyma.10G249700/Glyma.09G161600/Glyma.06G183900/Glyma.05G180100/Glyma.11G122500/Glyma.15G150900/Glyma.14G156400/Glyma.20G143900/Glyma.05G151200/Glyma.11G017900/Glyma.20G060300/Glyma.11G035200/Glyma.14G042000/Glyma.14G152100/Glyma.07G161900/Glyma.12G015300/Glyma.01G031500/Glyma.07G149400/Glyma.02G051500/Glyma.06G114300/Glyma.11G175900…	34
12 h	04146	Peroxisome	49/3440	142/14423	0.00260013	0.0173689	0.0128091	Glyma.11G254100/Glyma.07G080200/Glyma.03G119400/Glyma.12G221000/Glyma.08G203400/Glyma.20G004600/Glyma.17G009400/Glyma.05G005300/Glyma.15G111500/Glyma.19G236200/Glyma.18G030100/Glyma.17G089700/Glyma.14G223500/Glyma.15G083100/Glyma.10G249700/Glyma.14G211000/Glyma.15G266700/Glyma.05G180100/Glyma.11G122500/Glyma.09G007100/Glyma.04G017500/Glyma.11G125400/Glyma.05G141400/Glyma.06G017900/Glyma.20G143900…	49
12 h	00592	alpha-Linolenic acid metabolism	36/3440	98/14423	0.00282476	0.0181437	0.0133804	Glyma.04G240800/Glyma.11G122700/Glyma.07G039900/Glyma.17G050000/Glyma.08G102900/Glyma.05G180100/Glyma.14G156400/Glyma.17G246500/Glyma.19G132900/Glyma.14G223200/Glyma.01G235600/Glyma.13G239000/Glyma.13G047300/Glyma.11G035200/Glyma.03G130900/Glyma.16G008700/Glyma.19G044900/Glyma.12G191400/Glyma.19G263300/Glyma.17G209900/Glyma.13G070900/Glyma.14G223600/Glyma.13G109700/Glyma.19G057500/Glyma.12G054700…	36
12 h	09109	Metabolism of terpenoids and polyketides	95/3440	309/14423	0.00307444	0.019016	0.0140237	Glyma.14G059900/Glyma.04G237000/Glyma.06G038700/Glyma.18G274400/Glyma.02G240200/Glyma.19G236200/Glyma.17G091000/Glyma.13G147500/Glyma.02G059000/Glyma.10G231200/Glyma.09G252800/Glyma.19G251000/Glyma.19G033900/Glyma.06G049500/Glyma.15G243100/Glyma.20G227900/Glyma.11G151700/Glyma.06G183900/Glyma.11G228900/Glyma.10G062200/Glyma.18G118100/Glyma.01G156700/Glyma.02G273100/Glyma.15G093900/Glyma.17G132300…	95
12 h	00710	Carbon fixation in photosynthetic organisms	41/3440	116/14423	0.00342351	0.0197941	0.0145976	Glyma.15G019300/Glyma.09G210900/Glyma.07G185400/Glyma.16G013900/Glyma.01G010200/Glyma.01G026700/Glyma.09G262900/Glyma.20G192200/Glyma.07G142700/Glyma.10G205500/Glyma.13G097100/Glyma.20G122500/Glyma.12G161300/Glyma.07G074700/Glyma.13G270400/Glyma.20G125200/Glyma.04G015900/Glyma.10G293500/Glyma.06G087800/Glyma.06G015900/Glyma.16G077800/Glyma.20G243500/Glyma.13G146200/Glyma.19G046600/Glyma.17G020600…	41
12 h	04712	Circadian rhythm - plant	36/3440	99/14423	0.00343731	0.0197941	0.0145976	Glyma.06G103200/Glyma.17G231600/Glyma.11G148362/Glyma.11G018700/Glyma.04G166300/Glyma.11G050000/Glyma.06G196200/Glyma.04G050200/Glyma.20G209900/Glyma.01G192100/Glyma.16G163200/Glyma.20G170000/Glyma.07G058200/Glyma.10G221500/Glyma.19G260900/Glyma.17G102200/Glyma.05G025000/Glyma.05G067100/Glyma.16G017400/Glyma.07G048500/Glyma.14G174200/Glyma.13G089200/Glyma.03G261800/Glyma.06G136600/Glyma.04G228300…	36
12 h	00910	Nitrogen metabolism	24/3440	60/14423	0.00392832	0.0218677	0.0161268	Glyma.07G012500/Glyma.01G030500/Glyma.02G132100/Glyma.13G257200/Glyma.10G005200/Glyma.03G128300/Glyma.18G041100/Glyma.02G244000/Glyma.19G130800/Glyma.16G041200/Glyma.17G161900/Glyma.09G173200/Glyma.11G215500/Glyma.15G057700/Glyma.03G133600/Glyma.02G072200/Glyma.13G210800/Glyma.02G213700/Glyma.18G138400/Glyma.15G102000/Glyma.13G084000/Glyma.05G007100/Glyma.06G109200/Glyma.19G007700	24
12 h	00770	Pantothenate and CoA biosynthesis	29/3440	77/14423	0.00460473	0.0246812	0.0182017	Glyma.04G254600/Glyma.14G032300/Glyma.15G055500/Glyma.17G091000/Glyma.18G116300/Glyma.03G212300/Glyma.06G183900/Glyma.18G139100/Glyma.01G173050/Glyma.08G028900/Glyma.08G285700/Glyma.14G152100/Glyma.02G164100/Glyma.02G278600/Glyma.01G031500/Glyma.02G051500/Glyma.06G050100/Glyma.08G303800/Glyma.06G114300/Glyma.14G036000/Glyma.02G034000/Glyma.13G170600/Glyma.04G049200/Glyma.14G209400/Glyma.16G131700…	29
12 h	00908	Zeatin biosynthesis	20/3440	48/14423	0.00472933	0.0246812	0.0182017	Glyma.18G274400/Glyma.10G062200/Glyma.19G187500/Glyma.08G365000/Glyma.03G134500/Glyma.14G099000/Glyma.03G186900/Glyma.12G011400/Glyma.20G116500/Glyma.18G297200/Glyma.15G103800/Glyma.15G170300/Glyma.09G063900/Glyma.19G187100/Glyma.10G025300/Glyma.02G148600/Glyma.03G187700/Glyma.09G225400/Glyma.03G187000/Glyma.19G135100	20
12 h	01004	Lipid biosynthesis proteins	50/3440	152/14423	0.00692993	0.0350697	0.0258629	Glyma.11G254100/Glyma.02G273300/Glyma.03G056700/Glyma.07G080800/Glyma.18G232000/Glyma.03G015500/Glyma.04G204300/Glyma.04G033600/Glyma.17G120400/Glyma.18G246900/Glyma.09G195000/Glyma.10G249700/Glyma.19G147400/Glyma.19G233400/Glyma.16G042000/Glyma.06G220300/Glyma.01G120400/Glyma.11G245600/Glyma.11G122500/Glyma.07G205900/Glyma.06G033800/Glyma.20G143900/Glyma.05G151200/Glyma.07G075500/Glyma.07G151300…	50
12 h	00564	Glycerophospholipid metabolism	55/3440	171/14423	0.00799117	0.0392507	0.0289463	Glyma.09G051200/Glyma.17G077100/Glyma.07G080800/Glyma.02G093500/Glyma.02G078500/Glyma.06G169100/Glyma.05G221700/Glyma.15G152100/Glyma.04G033600/Glyma.09G195000/Glyma.13G134500/Glyma.06G176400/Glyma.19G233400/Glyma.08G209800/Glyma.06G220300/Glyma.06G061500/Glyma.13G093100/Glyma.06G033800/Glyma.10G183200/Glyma.10G046400/Glyma.04G148300/Glyma.05G196100/Glyma.01G215100/Glyma.19G136100/Glyma.17G248200…	55
12 h	00250	Alanine, aspartate and glutamate metabolism	33/3440	94/14423	0.00903367	0.0431035	0.0317876	Glyma.11G096200/Glyma.05G018300/Glyma.07G012500/Glyma.05G188500/Glyma.16G013900/Glyma.01G026700/Glyma.09G168900/Glyma.05G131400/Glyma.05G007600/Glyma.18G061100/Glyma.18G041100/Glyma.02G244000/Glyma.14G086300/Glyma.14G195000/Glyma.16G041200/Glyma.16G218500/Glyma.09G173200/Glyma.02G038100/Glyma.11G215500/Glyma.18G043600/Glyma.14G211100/Glyma.08G302600/Glyma.05G029200/Glyma.01G129400/Glyma.11G170300…	33
12 h	00340	Histidine metabolism	16/3440	38/14423	0.0097721	0.0433351	0.0319584	Glyma.09G025600/Glyma.17G091000/Glyma.06G183900/Glyma.04G009800/Glyma.14G152100/Glyma.01G031500/Glyma.02G051500/Glyma.06G114300/Glyma.02G034000/Glyma.13G170600/Glyma.16G131700/Glyma.13G340000/Glyma.04G248500/Glyma.12G057400/Glyma.15G034400/Glyma.08G076400	16
12 h	00945	Stilbenoid, diarylheptanoid and gingerol biosynthesis	16/3440	38/14423	0.0097721	0.0433351	0.0319584	Glyma.14G205200/Glyma.03G122000/Glyma.19G126000/Glyma.02G236500/Glyma.10G060700/Glyma.18G104000/Glyma.08G220200/Glyma.07G021600/Glyma.07G214700/Glyma.08G311500/Glyma.02G069100/Glyma.13G371000/Glyma.02G103500/Glyma.17G171100/Glyma.01G187700/Glyma.18G113100	16
12 h	00500	Starch and sucrose metabolism	72/3440	235/14423	0.00986067	0.0433351	0.0319584	Glyma.15G210100/Glyma.16G217900/Glyma.08G028400/Glyma.06G129400/Glyma.06G030400/Glyma.19G113600/Glyma.04G119700/Glyma.14G218800/Glyma.11G176400/Glyma.12G005200/Glyma.05G219200/Glyma.13G161600/Glyma.15G029800/Glyma.11G239300/Glyma.06G323700/Glyma.06G184200/Glyma.06G104800/Glyma.02G018700/Glyma.02G033500/Glyma.12G051800/Glyma.04G180900/Glyma.20G213300/Glyma.08G028900/Glyma.20G153600/Glyma.17G109700…	72
12 h	00906	Carotenoid biosynthesis	20/3440	51/14423	0.0103898	0.0444896	0.0328098	Glyma.02G240200/Glyma.13G147500/Glyma.10G231200/Glyma.09G252800/Glyma.19G251000/Glyma.20G227900/Glyma.11G151700/Glyma.10G086700/Glyma.15G172200/Glyma.18G111900/Glyma.09G066200/Glyma.18G239900/Glyma.01G154900/Glyma.14G045100/Glyma.08G306200/Glyma.14G209700/Glyma.09G000600/Glyma.11G161947/Glyma.02G104300/Glyma.08G176300	20
16 h	09159	Environmental adaptation	208/3421	467/14423	7.90036e-24	1.30356e-21	8.8983e-22	Glyma.08G180800/Glyma.07G003200/Glyma.16G218200/Glyma.20G249600/Glyma.01G171000/Glyma.05G011100/Glyma.14G216300/Glyma.14G006800/Glyma.03G260300/Glyma.18G096500/Glyma.08G177600/Glyma.20G170000/Glyma.06G196200/Glyma.04G166300/Glyma.14G074300/Glyma.05G198300/Glyma.16G163200/Glyma.04G188700/Glyma.15G051600/Glyma.08G323200/Glyma.06G320700/Glyma.19G068300/Glyma.20G054500/Glyma.11G018700/Glyma.17G039800…	208
16 h	04626	Plant-pathogen interaction	169/3421	368/14423	3.04083e-21	2.50869e-19	1.71247e-19	Glyma.08G180800/Glyma.07G003200/Glyma.16G218200/Glyma.20G249600/Glyma.01G171000/Glyma.05G011100/Glyma.14G216300/Glyma.14G006800/Glyma.03G260300/Glyma.18G096500/Glyma.08G177600/Glyma.14G074300/Glyma.05G198300/Glyma.04G188700/Glyma.15G051600/Glyma.08G323200/Glyma.06G320700/Glyma.19G068300/Glyma.20G054500/Glyma.17G039800/Glyma.04G204400/Glyma.09G224600/Glyma.02G138800/Glyma.06G189600/Glyma.16G099600…	169
16 h	01001	Protein kinases	170/3421	454/14423	2.08694e-11	1.14782e-09	7.83519e-10	Glyma.08G180800/Glyma.07G003200/Glyma.12G093800/Glyma.05G016900/Glyma.12G166100/Glyma.13G215200/Glyma.13G149200/Glyma.19G191600/Glyma.04G029700/Glyma.20G249600/Glyma.06G238000/Glyma.17G083100/Glyma.04G218300/Glyma.14G094400/Glyma.09G197000/Glyma.07G125200/Glyma.10G275400/Glyma.04G063600/Glyma.03G069800/Glyma.18G096500/Glyma.17G229100/Glyma.10G009900/Glyma.08G002900/Glyma.10G124200/Glyma.02G235700…	170
16 h	04016	MAPK signaling pathway - plant	92/3421	208/14423	4.8144e-11	1.98594e-09	1.35563e-09	Glyma.08G180800/Glyma.07G003200/Glyma.19G191600/Glyma.16G025900/Glyma.15G031800/Glyma.03G191000/Glyma.03G216700/Glyma.17G178800/Glyma.15G051600/Glyma.13G151100/Glyma.16G009300/Glyma.02G250200/Glyma.08G005100/Glyma.19G068300/Glyma.13G145100/Glyma.20G221800/Glyma.14G108400/Glyma.07G056900/Glyma.09G002600/Glyma.02G138800/Glyma.17G218700/Glyma.13G076700/Glyma.02G165800/Glyma.04G203200/Glyma.06G162300…	92
16 h	99980	Enzymes with EC numbers	151/3421	402/14423	2.16659e-10	7.14975e-09	4.88053e-09	Glyma.05G042700/Glyma.08G149400/Glyma.07G228300/Glyma.08G139100/Glyma.15G056800/Glyma.15G061100/Glyma.17G125500/Glyma.10G022700/Glyma.12G049500/Glyma.20G019100/Glyma.13G348200/Glyma.05G138700/Glyma.20G031600/Glyma.16G073600/Glyma.19G115400/Glyma.08G286800/Glyma.02G227700/Glyma.07G189900/Glyma.11G253900/Glyma.13G069100/Glyma.04G093600/Glyma.18G097000/Glyma.18G142500/Glyma.03G242000/Glyma.01G013900…	151
16 h	09191	Unclassified: metabolism	153/3421	415/14423	7.81044e-10	2.14787e-08	1.46617e-08	Glyma.05G042700/Glyma.08G149400/Glyma.07G228300/Glyma.08G139100/Glyma.15G056800/Glyma.15G061100/Glyma.18G092500/Glyma.17G125500/Glyma.10G022700/Glyma.12G049500/Glyma.20G019100/Glyma.13G348200/Glyma.05G138700/Glyma.20G031600/Glyma.16G073600/Glyma.19G115400/Glyma.08G286800/Glyma.02G227700/Glyma.07G189900/Glyma.11G253900/Glyma.13G069100/Glyma.04G093600/Glyma.18G097000/Glyma.18G142500/Glyma.03G242000…	153
16 h	00053	Ascorbate and aldarate metabolism	40/3421	74/14423	1.69565e-08	3.99688e-07	2.72833e-07	Glyma.18G092900/Glyma.01G057100/Glyma.02G292800/Glyma.11G150243/Glyma.U031121/Glyma.19G061200/Glyma.17G091000/Glyma.08G243000/Glyma.06G068200/Glyma.04G009800/Glyma.06G183900/Glyma.02G051500/Glyma.10G162000/Glyma.07G013900/Glyma.13G057700/Glyma.11G078400/Glyma.05G224500/Glyma.16G073100/Glyma.12G032300/Glyma.20G224400/Glyma.17G077000/Glyma.14G152100/Glyma.06G114400/Glyma.11G107200/Glyma.05G022600/G…	40
16 h	00630	Glyoxylate and dicarboxylate metabolism	54/3421	118/14423	1.17019e-07	2.41352e-06	1.6475e-06	Glyma.14G207700/Glyma.18G104400/Glyma.19G107300/Glyma.01G026700/Glyma.07G081900/Glyma.08G108900/Glyma.07G185400/Glyma.08G311200/Glyma.12G098900/Glyma.05G141400/Glyma.14G026400/Glyma.09G015500/Glyma.15G016100/Glyma.03G128300/Glyma.19G130800/Glyma.14G223500/Glyma.09G173200/Glyma.13G308700/Glyma.14G184500/Glyma.04G017500/Glyma.12G193800/Glyma.17G012000/Glyma.06G017900/Glyma.19G046600/Glyma.02G288500…	54
16 h	00500	Starch and sucrose metabolism	90/3421	235/14423	3.53527e-07	6.48134e-06	4.42426e-06	Glyma.08G334000/Glyma.02G086200/Glyma.15G210100/Glyma.18G136200/Glyma.16G200600/Glyma.10G270800/Glyma.11G015800/Glyma.08G033300/Glyma.12G005200/Glyma.08G028400/Glyma.07G172000/Glyma.08G025500/Glyma.11G176400/Glyma.11G111500/Glyma.20G120300/Glyma.17G257800/Glyma.06G129400/Glyma.05G219200/Glyma.16G217900/Glyma.08G244900/Glyma.13G161600/Glyma.19G113600/Glyma.04G119700/Glyma.06G184200/Glyma.06G323700…	90
16 h	01003	Glycosyltransferases	115/3421	320/14423	4.60702e-07	7.60158e-06	5.18896e-06	Glyma.18G085200/Glyma.02G086200/Glyma.05G024800/Glyma.08G309900/Glyma.15G210100/Glyma.18G136200/Glyma.17G110300/Glyma.10G270800/Glyma.10G128800/Glyma.07G172000/Glyma.19G028100/Glyma.05G086900/Glyma.07G046500/Glyma.05G187300/Glyma.15G275000/Glyma.08G145600/Glyma.20G120300/Glyma.06G240600/Glyma.12G113302/Glyma.03G159200/Glyma.06G129400/Glyma.04G159200/Glyma.18G264700/Glyma.09G263300/Glyma.07G081600…	115
16 h	00591	Linoleic acid metabolism	26/3421	45/14423	9.79668e-07	1.4695e-05	1.00311e-05	Glyma.08G102900/Glyma.13G239000/Glyma.08G189600/Glyma.07G039900/Glyma.02G190000/Glyma.19G132900/Glyma.16G008700/Glyma.03G130900/Glyma.03G091000/Glyma.19G263300/Glyma.07G034800/Glyma.12G054700/Glyma.07G034900/Glyma.20G144600/Glyma.11G130200/Glyma.03G264300/Glyma.10G249100/Glyma.13G030300/Glyma.07G007000/Glyma.U039300/Glyma.15G026400/Glyma.15G026500/Glyma.11G130300/Glyma.07G196800/Glyma.07G006900/G…	26
16 h	00520	Amino sugar and nucleotide sugar metabolism	95/3421	258/14423	1.34008e-06	1.84261e-05	1.2578e-05	Glyma.18G229800/Glyma.08G309900/Glyma.16G200600/Glyma.11G141200/Glyma.05G222000/Glyma.11G015800/Glyma.08G033300/Glyma.08G086700/Glyma.19G028100/Glyma.19G257700/Glyma.01G057100/Glyma.05G050500/Glyma.17G257800/Glyma.03G159200/Glyma.04G159200/Glyma.15G206800/Glyma.18G264700/Glyma.07G081600/Glyma.01G063000/Glyma.10G045800/Glyma.09G017000/Glyma.12G180300/Glyma.08G243000/Glyma.08G242500/Glyma.01G167500…	95
16 h	00592	alpha-Linolenic acid metabolism	44/3421	98/14423	3.18209e-06	4.0388e-05	2.75695e-05	Glyma.18G280900/Glyma.11G122700/Glyma.07G151500/Glyma.20G009100/Glyma.14G156400/Glyma.20G077000/Glyma.17G050000/Glyma.10G124700/Glyma.08G102900/Glyma.07G162900/Glyma.13G239000/Glyma.07G039900/Glyma.04G240800/Glyma.02G190000/Glyma.05G180100/Glyma.19G132900/Glyma.12G191400/Glyma.14G223200/Glyma.13G070900/Glyma.16G008700/Glyma.17G209900/Glyma.17G246500/Glyma.03G130900/Glyma.01G235600/Glyma.08G256600…	44
16 h	09106	Metabolism of other amino acids	123/3421	365/14423	7.95418e-06	9.37261e-05	6.39789e-05	Glyma.17G223900/Glyma.15G055500/Glyma.19G114500/Glyma.09G258000/Glyma.19G177200/Glyma.15G266700/Glyma.05G005300/Glyma.16G000200/Glyma.08G282800/Glyma.16G063200/Glyma.12G163700/Glyma.09G235400/Glyma.07G151500/Glyma.11G176400/Glyma.08G108900/Glyma.03G117300/Glyma.15G111500/Glyma.02G185300/Glyma.18G190300/Glyma.07G013800/Glyma.01G156600/Glyma.09G168900/Glyma.11G150243/Glyma.16G113100/Glyma.09G227500…	123
16 h	00410	beta-Alanine metabolism	40/3421	89/14423	8.52055e-06	9.37261e-05	6.39789e-05	Glyma.15G055500/Glyma.08G282800/Glyma.07G151500/Glyma.03G117300/Glyma.15G111500/Glyma.09G168900/Glyma.09G227500/Glyma.08G307800/Glyma.06G178400/Glyma.17G091000/Glyma.16G080900/Glyma.06G183900/Glyma.02G051500/Glyma.18G109900/Glyma.14G152100/Glyma.05G180100/Glyma.18G116300/Glyma.16G218500/Glyma.18G043600/Glyma.11G035200/Glyma.01G031500/Glyma.01G062400/Glyma.02G278600/Glyma.08G303800/Glyma.14G211100…	40
16 h	00903	Limonene and pinene degradation	13/3421	18/14423	1.84028e-05	0.000189779	0.000129546	Glyma.17G091000/Glyma.06G183900/Glyma.02G051500/Glyma.14G152100/Glyma.01G031500/Glyma.13G170600/Glyma.02G034000/Glyma.13G340000/Glyma.04G248500/Glyma.16G131700/Glyma.06G114300/Glyma.12G057400/Glyma.15G034400	13
16 h	00280	Valine, leucine and isoleucine degradation	39/3421	91/14423	4.18084e-05	0.000405787	0.000276997	Glyma.09G042000/Glyma.05G063900/Glyma.07G019100/Glyma.20G009100/Glyma.11G027000/Glyma.03G117300/Glyma.02G131500/Glyma.07G213500/Glyma.10G028700/Glyma.16G200200/Glyma.15G150900/Glyma.20G077000/Glyma.17G132300/Glyma.11G154423/Glyma.10G124700/Glyma.08G307800/Glyma.17G091000/Glyma.16G080900/Glyma.07G235400/Glyma.08G204300/Glyma.06G183900/Glyma.02G051500/Glyma.01G103100/Glyma.20G043000/Glyma.18G109900…	39
16 h	04040	Ion channels	37/3421	89/14423	0.000140294	0.00128603	0.000877864	Glyma.08G082200/Glyma.16G218200/Glyma.12G194100/Glyma.13G308500/Glyma.16G111700/Glyma.06G016000/Glyma.13G308400/Glyma.14G161600/Glyma.18G263900/Glyma.01G193700/Glyma.13G161800/Glyma.19G221000/Glyma.06G126600/Glyma.12G204400/Glyma.07G056400/Glyma.05G077100/Glyma.13G324600/Glyma.02G299700/Glyma.14G014100/Glyma.06G077600/Glyma.13G296900/Glyma.12G099500/Glyma.03G257000/Glyma.16G025400/Glyma.10G053900…	37
16 h	00199	Cytochrome P450	37/3421	92/14423	0.00031149	0.00270504	0.00184651	Glyma.02G256800/Glyma.13G120500/Glyma.09G252800/Glyma.20G114200/Glyma.11G122700/Glyma.07G110900/Glyma.11G228900/Glyma.03G122000/Glyma.13G147500/Glyma.14G205200/Glyma.07G162900/Glyma.14G059900/Glyma.02G236500/Glyma.05G021800/Glyma.02G051600/Glyma.08G365000/Glyma.13G217400/Glyma.19G126000/Glyma.18G239900/Glyma.12G191400/Glyma.11G074100/Glyma.17G246500/Glyma.10G202400/Glyma.18G297200/Glyma.16G149300…	37
16 h	04712	Circadian rhythm - plant	39/3421	99/14423	0.000358992	0.00296168	0.00202169	Glyma.20G170000/Glyma.06G196200/Glyma.04G166300/Glyma.16G163200/Glyma.11G018700/Glyma.11G050000/Glyma.10G221500/Glyma.04G050200/Glyma.07G058200/Glyma.01G192100/Glyma.06G103200/Glyma.16G017400/Glyma.07G048500/Glyma.20G209900/Glyma.05G025000/Glyma.03G261800/Glyma.17G102200/Glyma.04G228300/Glyma.19G260900/Glyma.16G018000/Glyma.08G110500/Glyma.05G067100/Glyma.06G136600/Glyma.14G174200/Glyma.13G089200…	39
16 h	00561	Glycerolipid metabolism	44/3421	117/14423	0.000517265	0.00406423	0.0027743	Glyma.12G045700/Glyma.09G263300/Glyma.01G113000/Glyma.09G207900/Glyma.17G091000/Glyma.19G175600/Glyma.10G046400/Glyma.13G134500/Glyma.14G077500/Glyma.13G101400/Glyma.18G197600/Glyma.06G183900/Glyma.13G085700/Glyma.13G093100/Glyma.02G051500/Glyma.07G069700/Glyma.15G012500/Glyma.05G196100/Glyma.01G113200/Glyma.14G152100/Glyma.02G190000/Glyma.19G132900/Glyma.06G299200/Glyma.12G200100/Glyma.03G130900…	44
16 h	09109	Metabolism of terpenoids and polyketides	98/3421	309/14423	0.000738221	0.00553666	0.00377941	Glyma.08G093400/Glyma.04G237000/Glyma.02G256800/Glyma.16G099800/Glyma.19G236200/Glyma.09G252800/Glyma.17G174500/Glyma.02G273100/Glyma.02G272200/Glyma.03G128900/Glyma.16G113000/Glyma.11G027000/Glyma.05G050500/Glyma.02G240200/Glyma.11G021400/Glyma.13G262200/Glyma.11G228900/Glyma.16G200200/Glyma.06G049500/Glyma.18G229700/Glyma.17G132300/Glyma.13G147500/Glyma.18G118100/Glyma.01G156700/Glyma.20G227900…	98
16 h	00710	Carbon fixation in photosynthetic organisms	43/3421	116/14423	0.000840879	0.00603239	0.0041178	Glyma.19G106800/Glyma.09G210900/Glyma.18G030400/Glyma.01G010200/Glyma.01G026700/Glyma.07G185400/Glyma.07G142700/Glyma.09G262900/Glyma.16G013900/Glyma.07G045900/Glyma.20G192200/Glyma.20G122500/Glyma.10G205500/Glyma.12G161300/Glyma.04G015900/Glyma.06G015900/Glyma.10G293500/Glyma.13G270400/Glyma.19G046600/Glyma.07G074700/Glyma.02G038100/Glyma.19G046800/Glyma.14G010900/Glyma.16G077800/Glyma.13G097100…	43
16 h	00062	Fatty acid elongation	21/3421	46/14423	0.000893445	0.00614243	0.00419292	Glyma.05G011100/Glyma.03G260300/Glyma.09G260200/Glyma.14G074300/Glyma.18G232000/Glyma.08G279700/Glyma.06G058500/Glyma.01G207200/Glyma.04G149300/Glyma.18G146900/Glyma.18G011500/Glyma.20G115500/Glyma.04G057800/Glyma.11G144809/Glyma.08G261100/Glyma.02G001500/Glyma.10G274400/Glyma.10G179400/Glyma.10G291700/Glyma.20G210900/Glyma.10G001800	21
16 h	04146	Peroxisome	50/3421	142/14423	0.00127966	0.00844577	0.00576522	Glyma.08G203400/Glyma.15G266700/Glyma.14G207700/Glyma.03G018700/Glyma.05G005300/Glyma.19G236200/Glyma.07G080200/Glyma.07G151500/Glyma.10G249700/Glyma.20G009100/Glyma.03G119400/Glyma.15G111500/Glyma.13G340300/Glyma.11G254100/Glyma.20G004600/Glyma.12G221000/Glyma.20G077000/Glyma.05G141400/Glyma.12G178800/Glyma.10G124700/Glyma.15G083100/Glyma.20G143900/Glyma.13G317600/Glyma.14G223500/Glyma.14G211000…	50
16 h	09108	Metabolism of cofactors and vitamins	135/3421	453/14423	0.00149135	0.00946436	0.00646052	Glyma.18G099900/Glyma.02G301700/Glyma.15G025600/Glyma.15G055500/Glyma.01G197100/Glyma.01G226700/Glyma.11G235400/Glyma.02G218300/Glyma.14G154600/Glyma.18G158900/Glyma.20G114200/Glyma.08G188200/Glyma.09G002300/Glyma.08G330200/Glyma.06G051100/Glyma.08G108900/Glyma.13G234000/Glyma.10G048200/Glyma.10G003200/Glyma.15G130500/Glyma.08G195100/Glyma.04G089800/Glyma.07G188200/Glyma.10G128400/Glyma.19G148100…	135
16 h	00071	Fatty acid degradation	34/3421	89/14423	0.00155757	0.00951847	0.00649746	Glyma.09G042000/Glyma.07G151500/Glyma.10G249700/Glyma.20G009100/Glyma.11G254100/Glyma.14G156400/Glyma.15G150900/Glyma.20G077000/Glyma.10G124700/Glyma.20G143900/Glyma.17G091000/Glyma.11G017900/Glyma.02G274100/Glyma.05G151200/Glyma.06G183900/Glyma.02G051500/Glyma.04G240800/Glyma.20G060300/Glyma.14G042000/Glyma.14G152100/Glyma.05G180100/Glyma.07G161900/Glyma.11G035200/Glyma.01G031500/Glyma.07G149400…	34
16 h	00906	Carotenoid biosynthesis	22/3421	51/14423	0.00170765	0.00977438	0.00667214	Glyma.09G252800/Glyma.17G174500/Glyma.02G272200/Glyma.03G128900/Glyma.02G240200/Glyma.13G147500/Glyma.20G227900/Glyma.10G231200/Glyma.11G151700/Glyma.15G172200/Glyma.10G086700/Glyma.18G239900/Glyma.01G154900/Glyma.08G306200/Glyma.14G209700/Glyma.09G066200/Glyma.14G045100/Glyma.09G000600/Glyma.19G160300/Glyma.11G161947/Glyma.02G104300/Glyma.08G176300	22
16 h	00650	Butanoate metabolism	17/3421	36/14423	0.00171792	0.00977438	0.00667214	Glyma.11G027000/Glyma.11G096200/Glyma.16G200200/Glyma.09G168900/Glyma.17G132300/Glyma.07G235400/Glyma.06G254700/Glyma.07G059800/Glyma.20G043000/Glyma.16G028700/Glyma.16G218500/Glyma.18G043600/Glyma.14G211100/Glyma.14G036600/Glyma.11G213000/Glyma.02G277900/Glyma.08G091400	17
16 h	01009	Protein phosphatases and associated proteins	135/3421	460/14423	0.00278571	0.0153214	0.0104586	Glyma.15G129300/Glyma.15G192300/Glyma.04G087200/Glyma.10G058900/Glyma.11G140500/Glyma.08G257900/Glyma.08G194000/Glyma.18G282300/Glyma.02G235700/Glyma.04G059000/Glyma.03G251500/Glyma.01G168200/Glyma.16G114700/Glyma.17G223800/Glyma.13G002100/Glyma.14G101400/Glyma.02G229600/Glyma.04G185200/Glyma.19G068300/Glyma.03G245500/Glyma.05G073300/Glyma.02G257400/Glyma.08G195100/Glyma.17G120300/Glyma.20G145800…	135
16 h	00945	Stilbenoid, diarylheptanoid and gingerol biosynthesis	17/3421	38/14423	0.00351342	0.0187005	0.0127652	Glyma.20G114200/Glyma.03G122000/Glyma.14G205200/Glyma.18G103500/Glyma.02G236500/Glyma.02G069100/Glyma.07G021600/Glyma.19G126000/Glyma.07G214700/Glyma.08G220200/Glyma.13G371000/Glyma.02G103500/Glyma.01G187700/Glyma.17G171100/Glyma.08G311500/Glyma.18G104000/Glyma.18G113100	17
16 h	00910	Nitrogen metabolism	24/3421	60/14423	0.00364025	0.01877	0.0128127	Glyma.07G012500/Glyma.02G132100/Glyma.01G030500/Glyma.13G257200/Glyma.10G005200/Glyma.03G128300/Glyma.19G130800/Glyma.09G173200/Glyma.16G041200/Glyma.18G041100/Glyma.02G244000/Glyma.17G161900/Glyma.11G215500/Glyma.15G057700/Glyma.02G213700/Glyma.13G210800/Glyma.14G165000/Glyma.15G102000/Glyma.18G141900/Glyma.18G138400/Glyma.19G007700/Glyma.13G084000/Glyma.05G007100/Glyma.06G109200	24
16 h	99997	Function unknown	21/3421	51/14423	0.00423524	0.0211762	0.0144552	Glyma.13G107800/Glyma.03G066000/Glyma.12G191200/Glyma.11G082000/Glyma.01G161700/Glyma.07G271000/Glyma.17G054200/Glyma.05G213000/Glyma.11G131700/Glyma.17G045900/Glyma.06G293500/Glyma.17G051500/Glyma.20G213200/Glyma.10G177000/Glyma.20G247000/Glyma.17G002900/Glyma.11G110000/Glyma.20G164100/Glyma.10G229000/Glyma.12G036900/Glyma.07G273000	21
16 h	00130	Ubiquinone and other terpenoid-quinone biosynthesis	29/3421	78/14423	0.00523766	0.025418	0.0173507	Glyma.20G114200/Glyma.15G130500/Glyma.07G188200/Glyma.15G001700/Glyma.03G206500/Glyma.14G205200/Glyma.01G177600/Glyma.12G216900/Glyma.02G236500/Glyma.02G002000/Glyma.01G232400/Glyma.18G139700/Glyma.13G095600/Glyma.13G284200/Glyma.17G064600/Glyma.11G010500/Glyma.09G024500/Glyma.15G064700/Glyma.08G285500/Glyma.08G061200/Glyma.12G014300/Glyma.12G045300/Glyma.13G372000/Glyma.13G152780/Glyma.13G249600…	29
16 h	00565	Ether lipid metabolism	19/3421	46/14423	0.00611704	0.0288375	0.0196849	Glyma.06G169100/Glyma.02G093500/Glyma.15G152100/Glyma.20G238000/Glyma.11G178400/Glyma.06G061500/Glyma.06G033800/Glyma.05G168300/Glyma.01G215100/Glyma.18G288600/Glyma.02G190000/Glyma.19G132900/Glyma.06G068700/Glyma.03G130900/Glyma.06G020500/Glyma.13G364900/Glyma.16G081200/Glyma.18G265800/Glyma.03G092800	19
16 h	00564	Glycerophospholipid metabolism	55/3421	171/14423	0.00711248	0.0317686	0.0216858	Glyma.02G165500/Glyma.06G169100/Glyma.02G093500/Glyma.05G020500/Glyma.09G195000/Glyma.12G045700/Glyma.15G152100/Glyma.02G078500/Glyma.10G183200/Glyma.20G238000/Glyma.11G178400/Glyma.06G216800/Glyma.09G207900/Glyma.19G233400/Glyma.04G148300/Glyma.19G175600/Glyma.10G046400/Glyma.13G134500/Glyma.06G061500/Glyma.14G077500/Glyma.06G033800/Glyma.16G110900/Glyma.05G168300/Glyma.19G136100/Glyma.13G085700…	55
16 h	00051	Fructose and mannose metabolism	41/3421	121/14423	0.00712387	0.0317686	0.0216858	Glyma.18G229800/Glyma.16G200600/Glyma.11G015800/Glyma.08G033300/Glyma.19G257700/Glyma.07G142700/Glyma.17G257800/Glyma.16G220300/Glyma.20G122500/Glyma.18G060600/Glyma.01G167500/Glyma.14G072600/Glyma.12G204700/Glyma.05G226600/Glyma.15G029800/Glyma.11G075700/Glyma.14G218800/Glyma.14G010900/Glyma.09G273500/Glyma.13G296600/Glyma.20G213300/Glyma.11G127200/Glyma.08G031700/Glyma.13G353400/Glyma.07G126400…	41
16 h	09194	Poorly characterized	24/3421	63/14423	0.00747866	0.0324731	0.0221667	Glyma.13G107800/Glyma.03G066000/Glyma.12G191200/Glyma.01G093200/Glyma.11G082000/Glyma.01G161700/Glyma.07G271000/Glyma.17G054200/Glyma.05G213000/Glyma.11G131700/Glyma.17G045900/Glyma.17G069700/Glyma.06G293500/Glyma.17G051500/Glyma.20G213200/Glyma.10G177000/Glyma.20G247000/Glyma.17G002900/Glyma.11G110000/Glyma.20G164100/Glyma.10G229000/Glyma.12G036900/Glyma.20G144800/Glyma.07G273000	24
16 h	00052	Galactose metabolism	37/3421	109/14423	0.00989271	0.0417956	0.0285303	Glyma.11G015800/Glyma.08G033300/Glyma.09G239800/Glyma.17G257800/Glyma.05G003900/Glyma.02G303300/Glyma.20G153600/Glyma.05G226600/Glyma.14G218800/Glyma.17G111400/Glyma.08G011800/Glyma.08G031700/Glyma.13G353400/Glyma.07G271200/Glyma.07G126400/Glyma.05G056300/Glyma.19G020700/Glyma.01G005400/Glyma.15G020900/Glyma.16G209800/Glyma.13G160100/Glyma.15G133700/Glyma.01G211000/Glyma.14G096600/Glyma.05G224900…	37
16 h	00940	Phenylpropanoid biosynthesis	95/3421	323/14423	0.0101323	0.0417956	0.0285303	Glyma.10G262400/Glyma.05G231900/Glyma.04G227700/Glyma.20G128600/Glyma.20G114200/Glyma.11G176400/Glyma.10G058200/Glyma.09G002500/Glyma.15G090300/Glyma.15G001700/Glyma.03G122000/Glyma.14G205200/Glyma.10G209800/Glyma.19G113600/Glyma.18G103500/Glyma.06G263100/Glyma.03G070300/Glyma.13G101400/Glyma.07G151800/Glyma.02G236500/Glyma.20G180800/Glyma.13G307000/Glyma.11G049600/Glyma.01G232400/Glyma.13G369800…	95
20 h	09159	Environmental adaptation	178/3344	467/14423	1.36983e-13	2.23283e-11	1.65822e-11	Glyma.04G166300/Glyma.19G068300/Glyma.03G223100/Glyma.06G103200/Glyma.06G196200/Glyma.03G084000/Glyma.12G039400/Glyma.16G218200/Glyma.10G221500/Glyma.08G177600/Glyma.11G072100/Glyma.05G198700/Glyma.11G018700/Glyma.18G166800/Glyma.15G048600/Glyma.16G163200/Glyma.20G054500/Glyma.19G121900/Glyma.13G141000/Glyma.06G320700/Glyma.02G138800/Glyma.11G077300/Glyma.07G238700/Glyma.08G319300/Glyma.04G203200…	178
20 h	04626	Plant-pathogen interaction	145/3344	368/14423	1.42785e-12	1.1637e-10	8.64228e-11	Glyma.19G068300/Glyma.03G223100/Glyma.03G084000/Glyma.12G039400/Glyma.16G218200/Glyma.08G177600/Glyma.11G072100/Glyma.05G198700/Glyma.18G166800/Glyma.15G048600/Glyma.20G054500/Glyma.19G121900/Glyma.13G141000/Glyma.06G320700/Glyma.02G138800/Glyma.11G077300/Glyma.07G238700/Glyma.08G319300/Glyma.04G203200/Glyma.08G078200/Glyma.08G316500/Glyma.05G011100/Glyma.10G009100/Glyma.07G003200/Glyma.06G189600…	145
20 h	09191	Unclassified: metabolism	153/3344	415/14423	1.36343e-10	6.23603e-09	4.63121e-09	Glyma.14G182100/Glyma.11G220100/Glyma.02G290800/Glyma.03G069700/Glyma.03G242000/Glyma.19G061900/Glyma.08G315900/Glyma.07G189900/Glyma.18G142500/Glyma.08G059300/Glyma.08G149400/Glyma.08G210900/Glyma.08G268900/Glyma.05G015400/Glyma.04G045400/Glyma.19G175900/Glyma.06G175900/Glyma.08G319900/Glyma.15G056800/Glyma.19G239400/Glyma.16G073600/Glyma.07G066700/Glyma.17G125500/Glyma.05G042700/Glyma.08G058000…	153
20 h	99980	Enzymes with EC numbers	149/3344	402/14423	1.53031e-10	6.23603e-09	4.63121e-09	Glyma.14G182100/Glyma.11G220100/Glyma.02G290800/Glyma.03G069700/Glyma.03G242000/Glyma.19G061900/Glyma.08G315900/Glyma.07G189900/Glyma.18G142500/Glyma.08G059300/Glyma.08G149400/Glyma.08G210900/Glyma.08G268900/Glyma.05G015400/Glyma.04G045400/Glyma.19G175900/Glyma.06G175900/Glyma.15G056800/Glyma.19G239400/Glyma.16G073600/Glyma.17G125500/Glyma.05G042700/Glyma.08G058000/Glyma.09G008500/Glyma.18G097000…	149
20 h	00053	Ascorbate and aldarate metabolism	38/3344	74/14423	1.22174e-07	3.98289e-06	2.95791e-06	Glyma.13G030400/Glyma.12G073100/Glyma.18G092900/Glyma.19G244600/Glyma.17G091000/Glyma.19G061200/Glyma.11G150243/Glyma.06G114400/Glyma.02G292800/Glyma.13G057700/Glyma.17G077000/Glyma.06G068200/Glyma.13G076900/Glyma.06G183900/Glyma.20G224400/Glyma.04G009800/Glyma.14G152100/Glyma.10G162000/Glyma.18G265100/Glyma.12G032300/Glyma.16G073100/Glyma.19G028500/Glyma.11G107200/Glyma.11G078400/Glyma.01G031500…	38
20 h	00630	Glyoxylate and dicarboxylate metabolism	53/3344	118/14423	1.47781e-07	4.01473e-06	2.98155e-06	Glyma.12G193800/Glyma.14G223500/Glyma.09G004700/Glyma.01G026700/Glyma.11G043900/Glyma.03G128300/Glyma.15G016100/Glyma.13G046200/Glyma.07G081900/Glyma.04G017500/Glyma.07G185400/Glyma.14G026400/Glyma.05G141400/Glyma.14G184500/Glyma.19G130800/Glyma.06G017900/Glyma.12G098900/Glyma.09G015500/Glyma.13G097100/Glyma.17G012000/Glyma.08G157700/Glyma.17G161900/Glyma.15G012500/Glyma.14G094700/Glyma.09G173200…	53
20 h	04016	MAPK signaling pathway - plant	81/3344	208/14423	2.23228e-07	5.19802e-06	3.86033e-06	Glyma.03G216700/Glyma.02G165800/Glyma.13G076700/Glyma.19G068300/Glyma.13G145100/Glyma.14G223500/Glyma.16G009300/Glyma.14G108400/Glyma.05G198700/Glyma.15G048600/Glyma.17G178800/Glyma.16G025900/Glyma.19G121900/Glyma.02G250200/Glyma.07G056900/Glyma.02G138800/Glyma.07G238700/Glyma.13G229300/Glyma.04G203200/Glyma.08G078200/Glyma.07G003200/Glyma.14G066400/Glyma.05G123200/Glyma.13G041800/Glyma.20G051500…	81
20 h	00903	Limonene and pinene degradation	14/3344	18/14423	1.47354e-06	3.00233e-05	2.22969e-05	Glyma.13G030400/Glyma.17G091000/Glyma.06G183900/Glyma.14G152100/Glyma.01G031500/Glyma.02G034000/Glyma.02G051500/Glyma.13G170600/Glyma.13G340000/Glyma.16G131700/Glyma.06G114300/Glyma.04G248500/Glyma.12G057400/Glyma.15G034400	14
20 h	01001	Protein kinases	145/3344	454/14423	9.08916e-06	0.000164615	0.000122252	Glyma.13G002100/Glyma.06G238000/Glyma.02G165800/Glyma.09G030000/Glyma.14G186700/Glyma.16G088700/Glyma.10G158800/Glyma.03G140100/Glyma.05G016900/Glyma.02G180100/Glyma.04G029700/Glyma.03G223100/Glyma.17G022800/Glyma.16G104600/Glyma.03G243500/Glyma.15G269800/Glyma.07G066800/Glyma.09G178500/Glyma.13G215200/Glyma.14G139800/Glyma.18G043300/Glyma.03G011000/Glyma.08G050900/Glyma.03G069800/Glyma.17G242000…	145
20 h	00591	Linoleic acid metabolism	24/3344	45/14423	1.10721e-05	0.000180475	0.00013403	Glyma.08G102900/Glyma.19G132900/Glyma.07G039900/Glyma.19G263300/Glyma.13G239000/Glyma.03G130900/Glyma.16G008700/Glyma.02G190000/Glyma.07G034800/Glyma.12G054700/Glyma.11G130200/Glyma.U039300/Glyma.15G026400/Glyma.13G030300/Glyma.07G007000/Glyma.07G034900/Glyma.20G144600/Glyma.03G264300/Glyma.10G249100/Glyma.07G196800/Glyma.15G026500/Glyma.07G006900/Glyma.11G130300/Glyma.13G347700	24
20 h	99997	Function unknown	25/3344	51/14423	4.81476e-05	0.00071346	0.000529854	Glyma.11G248300/Glyma.17G051500/Glyma.07G271000/Glyma.08G019500/Glyma.12G026000/Glyma.11G131700/Glyma.16G205600/Glyma.13G111600/Glyma.17G054200/Glyma.03G066000/Glyma.13G107800/Glyma.12G191200/Glyma.17G045900/Glyma.01G161700/Glyma.05G213000/Glyma.17G002900/Glyma.11G082000/Glyma.20G213200/Glyma.10G177000/Glyma.20G247000/Glyma.20G164100/Glyma.12G036900/Glyma.11G110000/Glyma.10G229000/Glyma.07G273000	25
20 h	00561	Glycerolipid metabolism	46/3344	117/14423	6.60058e-05	0.000896578	0.000665848	Glyma.13G030400/Glyma.19G142500/Glyma.12G045700/Glyma.17G091000/Glyma.19G175600/Glyma.01G113000/Glyma.09G263300/Glyma.19G132900/Glyma.13G093100/Glyma.05G196100/Glyma.06G220300/Glyma.14G077500/Glyma.18G197600/Glyma.03G008300/Glyma.09G207900/Glyma.07G069700/Glyma.03G130900/Glyma.06G183900/Glyma.14G152100/Glyma.15G012500/Glyma.13G101400/Glyma.06G299200/Glyma.13G085700/Glyma.07G028600/Glyma.02G190000…	46
20 h	00410	beta-Alanine metabolism	37/3344	89/14423	8.48495e-05	0.00106388	0.000790096	Glyma.14G032300/Glyma.13G030400/Glyma.08G282800/Glyma.17G091000/Glyma.15G111500/Glyma.09G168900/Glyma.05G180100/Glyma.18G116300/Glyma.03G117300/Glyma.08G307800/Glyma.16G080900/Glyma.11G035200/Glyma.02G278600/Glyma.06G183900/Glyma.14G152100/Glyma.16G218500/Glyma.09G227500/Glyma.18G043600/Glyma.18G109900/Glyma.14G211100/Glyma.08G303800/Glyma.01G031500/Glyma.14G036000/Glyma.02G034000/Glyma.02G038500…	37
20 h	09194	Poorly characterized	28/3344	63/14423	0.00015471	0.00180127	0.00133772	Glyma.11G248300/Glyma.17G051500/Glyma.07G271000/Glyma.08G019500/Glyma.12G026000/Glyma.11G131700/Glyma.16G205600/Glyma.13G111600/Glyma.17G054200/Glyma.03G066000/Glyma.13G107800/Glyma.12G191200/Glyma.17G045900/Glyma.01G161700/Glyma.05G213000/Glyma.20G144800/Glyma.17G002900/Glyma.01G093200/Glyma.17G069700/Glyma.11G082000/Glyma.20G213200/Glyma.10G177000/Glyma.20G247000/Glyma.20G164100/Glyma.12G036900…	28
20 h	00280	Valine, leucine and isoleucine degradation	36/3344	91/14423	0.000340976	0.00370527	0.00275173	Glyma.13G030400/Glyma.09G042000/Glyma.07G019100/Glyma.07G213500/Glyma.20G077000/Glyma.10G124700/Glyma.15G150900/Glyma.17G091000/Glyma.10G028700/Glyma.03G117300/Glyma.06G120300/Glyma.08G307800/Glyma.17G132300/Glyma.11G154423/Glyma.01G103100/Glyma.16G080900/Glyma.06G183900/Glyma.14G152100/Glyma.03G070200/Glyma.20G043000/Glyma.07G235400/Glyma.14G036600/Glyma.18G109900/Glyma.01G129400/Glyma.01G031500…	36
20 h	04040	Ion channels	35/3344	89/14423	0.000467138	0.00475897	0.00353427	Glyma.16G218200/Glyma.13G141000/Glyma.16G111700/Glyma.01G193700/Glyma.13G161800/Glyma.18G263900/Glyma.09G168700/Glyma.14G161600/Glyma.05G077100/Glyma.12G204400/Glyma.06G126600/Glyma.03G257000/Glyma.05G029700/Glyma.19G221000/Glyma.12G099500/Glyma.02G299700/Glyma.13G296900/Glyma.04G174300/Glyma.07G056400/Glyma.13G324600/Glyma.01G157900/Glyma.10G053900/Glyma.11G087100/Glyma.19G255300/Glyma.14G014100…	35
20 h	00520	Amino sugar and nucleotide sugar metabolism	83/3344	258/14423	0.000546818	0.00524302	0.00389375	Glyma.12G064600/Glyma.13G133800/Glyma.10G018400/Glyma.19G244600/Glyma.12G201500/Glyma.10G032400/Glyma.10G045800/Glyma.07G081600/Glyma.11G075700/Glyma.08G242500/Glyma.19G038000/Glyma.03G159200/Glyma.12G180300/Glyma.17G194400/Glyma.11G141200/Glyma.15G051500/Glyma.19G161500/Glyma.05G050500/Glyma.09G030300/Glyma.03G006900/Glyma.03G027300/Glyma.06G205900/Glyma.18G229800/Glyma.14G218800/Glyma.15G122600…	83
20 h	00710	Carbon fixation in photosynthetic organisms	42/3344	116/14423	0.00101991	0.00923585	0.00685905	Glyma.15G019300/Glyma.18G030400/Glyma.01G026700/Glyma.11G043900/Glyma.12G161300/Glyma.09G210900/Glyma.07G142700/Glyma.20G122500/Glyma.01G010200/Glyma.10G205500/Glyma.13G046200/Glyma.20G166400/Glyma.07G185400/Glyma.07G074700/Glyma.16G077800/Glyma.20G192200/Glyma.13G270400/Glyma.04G015900/Glyma.06G015900/Glyma.20G125200/Glyma.10G293500/Glyma.13G097100/Glyma.20G243500/Glyma.17G020600/Glyma.12G210600…	42
20 h	04136	Autophagy - other	26/3344	64/14423	0.00137816	0.0118231	0.0087805	Glyma.12G005700/Glyma.09G003900/Glyma.02G008800/Glyma.02G207500/Glyma.06G306300/Glyma.10G009300/Glyma.03G069800/Glyma.09G231000/Glyma.05G058300/Glyma.15G108200/Glyma.03G097000/Glyma.17G070200/Glyma.02G240700/Glyma.09G244800/Glyma.01G038800/Glyma.16G007300/Glyma.02G220700/Glyma.11G031800/Glyma.17G013000/Glyma.17G140700/Glyma.07G261000/Glyma.08G146700/Glyma.07G124300/Glyma.01G210200/Glyma.04G215500…	26
20 h	00330	Arginine and proline metabolism	41/3344	115/14423	0.00163593	0.012698	0.0094302	Glyma.14G032300/Glyma.13G030400/Glyma.06G126700/Glyma.07G253200/Glyma.01G071300/Glyma.17G083400/Glyma.17G091000/Glyma.05G104400/Glyma.05G141900/Glyma.18G116300/Glyma.20G248500/Glyma.18G278800/Glyma.17G163900/Glyma.10G297300/Glyma.18G137100/Glyma.17G021200/Glyma.08G288100/Glyma.06G007500/Glyma.02G128000/Glyma.06G183900/Glyma.14G152100/Glyma.09G227500/Glyma.10G259100/Glyma.05G029200/Glyma.08G255800…	41
20 h	04070	Phosphatidylinositol signaling system	41/3344	115/14423	0.00163593	0.012698	0.0094302	Glyma.19G068300/Glyma.20G207000/Glyma.10G060000/Glyma.15G046400/Glyma.06G109400/Glyma.19G121900/Glyma.04G253100/Glyma.18G255000/Glyma.07G238700/Glyma.14G059200/Glyma.04G030000/Glyma.09G241100/Glyma.20G173200/Glyma.08G127700/Glyma.13G093100/Glyma.18G027200/Glyma.04G088000/Glyma.05G196100/Glyma.10G183200/Glyma.10G255000/Glyma.11G230000/Glyma.14G059400/Glyma.02G257200/Glyma.05G197200/Glyma.08G241500…	41
20 h	00062	Fatty acid elongation	20/3344	46/14423	0.00181972	0.0134825	0.0100128	Glyma.09G260200/Glyma.18G232000/Glyma.11G245600/Glyma.05G011100/Glyma.03G260300/Glyma.01G207200/Glyma.08G279700/Glyma.18G011500/Glyma.06G058500/Glyma.18G146900/Glyma.20G115500/Glyma.04G057800/Glyma.08G261100/Glyma.11G144809/Glyma.10G179400/Glyma.20G210900/Glyma.10G274400/Glyma.10G291700/Glyma.02G001500/Glyma.10G001800	20
20 h	04031	GTP-binding proteins	59/3344	180/14423	0.00199221	0.0141187	0.0104853	Glyma.11G107700/Glyma.13G208600/Glyma.13G289300/Glyma.06G023300/Glyma.09G243300/Glyma.11G135400/Glyma.12G044100/Glyma.10G171600/Glyma.03G153300/Glyma.17G146100/Glyma.20G211600/Glyma.11G178506/Glyma.12G065600/Glyma.15G104200/Glyma.05G191800/Glyma.13G333500/Glyma.15G040600/Glyma.13G146600/Glyma.19G006400/Glyma.09G038200/Glyma.19G052300/Glyma.02G244500/Glyma.11G040400/Glyma.05G105800/Glyma.01G202500…	59
20 h	04146	Peroxisome	48/3344	142/14423	0.0025001	0.0169799	0.0126102	Glyma.15G109800/Glyma.20G004600/Glyma.18G030100/Glyma.14G223500/Glyma.08G203400/Glyma.20G077000/Glyma.03G119400/Glyma.11G254100/Glyma.10G124700/Glyma.17G009400/Glyma.07G080200/Glyma.12G221000/Glyma.12G178800/Glyma.11G122500/Glyma.15G111500/Glyma.19G236200/Glyma.05G180100/Glyma.17G089700/Glyma.10G249700/Glyma.15G266700/Glyma.09G281200/Glyma.04G017500/Glyma.13G317600/Glyma.14G211000/Glyma.05G141400…	48
20 h	00910	Nitrogen metabolism	24/3344	60/14423	0.00265104	0.0172848	0.0128366	Glyma.07G012500/Glyma.02G132100/Glyma.02G035000/Glyma.03G128300/Glyma.01G030500/Glyma.19G130800/Glyma.10G005200/Glyma.17G161900/Glyma.16G041200/Glyma.13G257200/Glyma.09G173200/Glyma.02G244000/Glyma.18G041100/Glyma.03G133600/Glyma.11G215500/Glyma.15G057700/Glyma.15G102000/Glyma.13G210800/Glyma.02G213700/Glyma.18G138400/Glyma.13G084000/Glyma.05G007100/Glyma.06G109200/Glyma.19G007700	24
20 h	00770	Pantothenate and CoA biosynthesis	29/3344	77/14423	0.00297641	0.0186598	0.0138578	Glyma.14G032300/Glyma.13G030400/Glyma.03G020900/Glyma.04G254600/Glyma.17G091000/Glyma.13G154600/Glyma.18G116300/Glyma.02G164100/Glyma.03G212300/Glyma.08G028900/Glyma.02G278600/Glyma.06G183900/Glyma.08G285700/Glyma.14G152100/Glyma.18G139100/Glyma.01G173050/Glyma.08G303800/Glyma.01G031500/Glyma.14G036000/Glyma.02G034000/Glyma.02G051500/Glyma.14G209400/Glyma.13G170600/Glyma.13G340000/Glyma.16G131700…	29
20 h	00906	Carotenoid biosynthesis	21/3344	51/14423	0.003174	0.0191616	0.0142304	Glyma.09G252800/Glyma.02G240200/Glyma.03G128900/Glyma.10G231200/Glyma.13G147500/Glyma.19G251000/Glyma.20G227900/Glyma.17G174500/Glyma.10G086700/Glyma.15G172200/Glyma.11G151700/Glyma.01G154900/Glyma.18G239900/Glyma.09G066200/Glyma.14G209700/Glyma.14G045100/Glyma.08G306200/Glyma.09G000600/Glyma.08G176300/Glyma.02G104300/Glyma.11G161947	21
20 h	01004	Lipid biosynthesis proteins	50/3344	152/14423	0.0038667	0.0225097	0.016717	Glyma.03G056700/Glyma.19G142500/Glyma.09G260200/Glyma.18G232000/Glyma.11G254100/Glyma.09G195000/Glyma.11G245600/Glyma.12G045700/Glyma.04G033600/Glyma.01G120400/Glyma.19G233400/Glyma.18G246900/Glyma.11G122500/Glyma.04G204300/Glyma.06G033800/Glyma.10G249700/Glyma.17G120400/Glyma.18G202600/Glyma.03G015500/Glyma.06G220300/Glyma.04G151600/Glyma.14G077500/Glyma.03G144500/Glyma.07G075500/Glyma.20G143900…	50
20 h	00071	Fatty acid degradation	32/3344	89/14423	0.0043319	0.0243483	0.0180823	Glyma.13G030400/Glyma.09G042000/Glyma.20G077000/Glyma.11G254100/Glyma.10G124700/Glyma.04G240800/Glyma.15G150900/Glyma.17G091000/Glyma.11G122500/Glyma.05G180100/Glyma.10G249700/Glyma.09G161600/Glyma.20G143900/Glyma.11G035200/Glyma.11G017900/Glyma.06G183900/Glyma.14G152100/Glyma.20G060300/Glyma.14G042000/Glyma.01G031500/Glyma.02G034000/Glyma.07G149400/Glyma.02G051500/Glyma.07G161900/Glyma.13G170600…	32
20 h	09108	Metabolism of cofactors and vitamins	129/3344	453/14423	0.00460767	0.025035	0.0185923	Glyma.14G032300/Glyma.13G030400/Glyma.13G225000/Glyma.08G188200/Glyma.03G020900/Glyma.06G051100/Glyma.04G249400/Glyma.09G004700/Glyma.10G048200/Glyma.18G099900/Glyma.01G238400/Glyma.14G003200/Glyma.20G179400/Glyma.03G060100/Glyma.04G254600/Glyma.17G091000/Glyma.13G154600/Glyma.09G191200/Glyma.04G050400/Glyma.14G154600/Glyma.05G094000/Glyma.19G115900/Glyma.06G159900/Glyma.04G177000/Glyma.01G227400…	129
20 h	09106	Metabolism of other amino acids	106/3344	365/14423	0.00512765	0.0269615	0.0200231	Glyma.14G032300/Glyma.13G030400/Glyma.19G177200/Glyma.05G018300/Glyma.08G282800/Glyma.12G073100/Glyma.05G221700/Glyma.20G151500/Glyma.06G126700/Glyma.16G063200/Glyma.17G091000/Glyma.01G156600/Glyma.07G013800/Glyma.05G207100/Glyma.20G026300/Glyma.15G111500/Glyma.11G176400/Glyma.09G168900/Glyma.05G180100/Glyma.18G116300/Glyma.03G117300/Glyma.02G185300/Glyma.15G266700/Glyma.08G307800/Glyma.11G088200…	106
20 h	00564	Glycerophospholipid metabolism	54/3344	171/14423	0.007075	0.035302	0.0262172	Glyma.05G221700/Glyma.11G178400/Glyma.20G207000/Glyma.19G142500/Glyma.09G195000/Glyma.10G294500/Glyma.12G045700/Glyma.05G020500/Glyma.04G033600/Glyma.06G216800/Glyma.02G078500/Glyma.19G233400/Glyma.19G175600/Glyma.04G148300/Glyma.06G033800/Glyma.05G168300/Glyma.06G061500/Glyma.19G132900/Glyma.13G093100/Glyma.05G196100/Glyma.06G220300/Glyma.10G183200/Glyma.20G238000/Glyma.14G077500/Glyma.03G008300…	54
20 h	00340	Histidine metabolism	16/3344	38/14423	0.0073636	0.035302	0.0262172	Glyma.13G030400/Glyma.17G091000/Glyma.06G183900/Glyma.04G009800/Glyma.14G152100/Glyma.01G031500/Glyma.02G034000/Glyma.02G051500/Glyma.13G170600/Glyma.13G340000/Glyma.16G131700/Glyma.06G114300/Glyma.04G248500/Glyma.12G057400/Glyma.15G034400/Glyma.08G076400	16
20 h	00945	Stilbenoid, diarylheptanoid and gingerol biosynthesis	16/3344	38/14423	0.0073636	0.035302	0.0262172	Glyma.03G122000/Glyma.14G205200/Glyma.02G236500/Glyma.19G126000/Glyma.18G104000/Glyma.08G220200/Glyma.07G021600/Glyma.07G214700/Glyma.02G069100/Glyma.13G371000/Glyma.02G103500/Glyma.17G171100/Glyma.11G054500/Glyma.01G187700/Glyma.08G311500/Glyma.18G113100	16
20 h	01009	Protein phosphatases and associated proteins	129/3344	460/14423	0.00795769	0.0370601	0.0275228	Glyma.13G002100/Glyma.19G185200/Glyma.03G185200/Glyma.10G260500/Glyma.08G108800/Glyma.15G006300/Glyma.13G096400/Glyma.19G068300/Glyma.10G288800/Glyma.13G256700/Glyma.04G162700/Glyma.06G008000/Glyma.13G274800/Glyma.08G194000/Glyma.02G257400/Glyma.02G235700/Glyma.04G059000/Glyma.14G101400/Glyma.19G121900/Glyma.14G017800/Glyma.07G238700/Glyma.11G112700/Glyma.17G221100/Glyma.02G295600/Glyma.06G078100…	129
20 h	00250	Alanine, aspartate and glutamate metabolism	32/3344	94/14423	0.0107551	0.0486966	0.0361648	Glyma.07G012500/Glyma.05G018300/Glyma.11G096200/Glyma.01G026700/Glyma.08G086000/Glyma.09G168900/Glyma.05G188500/Glyma.05G007600/Glyma.18G061100/Glyma.14G195000/Glyma.16G041200/Glyma.05G131400/Glyma.09G173200/Glyma.02G244000/Glyma.18G041100/Glyma.14G086300/Glyma.16G218500/Glyma.02G038100/Glyma.18G043600/Glyma.01G129400/Glyma.05G029200/Glyma.11G215500/Glyma.14G211100/Glyma.08G302600/Glyma.05G029100…	32
