# Supplementary material for: GRF5 mediates circadian clock to gate seed quality in soybean
Source: Research Square preprint supplement (doi:10.21203/rs.3.rs-5535877/v1), 2025-03-05
Supplement: Supplementary file 4 [file 987b29d0d5dbe8216396196d.xlsx]

## Sheet: Sheet1
Name	Modified characters	Notes: Promoter sequence or reference	列1	列2	列3	列4	列5	列6	列7	列8	列9	列10	列11	列12	列13	列14	列15	列16	列17	列18	列19	列20	列21	列22	列23	列24	列25	列26	列27	列28	列29	列30	列31	列32	列33	列34	列35	列36	列37	列38	列39	列40	列41	列42	列43	列44	列45	列46	列47
OG-1	GFP-fused GmGRF5a overaxpression plant driven by GmGRF5a promoter(~3kb upstream of the start codon) under the genetic background of Williams 82. Line 1	TTTCAACACACTATGCGAGAAGGAAATTTGTATGGAGATTTTCTAGTAAAGAAAGGCTCTTCGTCTCAACATGTCTTTACTGTTTTCTTCTCTTGTCCAGAGGCCTTAGTTCATACTTTTGCTGCATATGAATGAGGCACCCTCTTTACTCGTTTGTAATCTCGCCTTTACTTTTCATACTCAATAAAAAAAAACTACCCAACCTAACCTTAATCAGCTTGATTTGCTTTGGGTTGTTTACAAAAAACAACATATTTTACCCAACCCAACTCAATTCTATTTTATTAGGTTGGATCATAAAATAGACGAAATCTGACTTACTCGTGCCCCTGACATCTATTGTAGCTGTGATGCAATTAAGTATATCATAAAAAAATTGATGTTGCAACTTTAATTGTG…
OG-9	GFP-fused GmGRF5a overaxpression plant driven by GmGRF5a promoter(~3kb upstream of the start codon) under the genetic background of Williams 82. Line 9	TTTCAACACACTATGCGAGAAGGAAATTTGTATGGAGATTTTCTAGTAAAGAAAGGCTCTTCGTCTCAACATGTCTTTACTGTTTTCTTCTCTTGTCCAGAGGCCTTAGTTCATACTTTTGCTGCATATGAATGAGGCACCCTCTTTACTCGTTTGTAATCTCGCCTTTACTTTTCATACTCAATAAAAAAAAACTACCCAACCTAACCTTAATCAGCTTGATTTGCTTTGGGTTGTTTACAAAAAACAACATATTTTACCCAACCCAACTCAATTCTATTTTATTAGGTTGGATCATAAAATAGACGAAATCTGACTTACTCGTGCCCCTGACATCTATTGTAGCTGTGATGCAATTAAGTATATCATAAAAAAATTGATGTTGCAACTTTAATTGTG…
OG-10	GFP-fused GmGRF5a overaxpression plant driven by GmGRF5a promoter(~3kb upstream of the start codon) under the genetic background of Williams 82. Line 10	TTTCAACACACTATGCGAGAAGGAAATTTGTATGGAGATTTTCTAGTAAAGAAAGGCTCTTCGTCTCAACATGTCTTTACTGTTTTCTTCTCTTGTCCAGAGGCCTTAGTTCATACTTTTGCTGCATATGAATGAGGCACCCTCTTTACTCGTTTGTAATCTCGCCTTTACTTTTCATACTCAATAAAAAAAAACTACCCAACCTAACCTTAATCAGCTTGATTTGCTTTGGGTTGTTTACAAAAAACAACATATTTTACCCAACCCAACTCAATTCTATTTTATTAGGTTGGATCATAAAATAGACGAAATCTGACTTACTCGTGCCCCTGACATCTATTGTAGCTGTGATGCAATTAAGTATATCATAAAAAAATTGATGTTGCAACTTTAATTGTG…
OG-11	GFP-fused GmGRF5a overaxpression plant driven by GmGRF5a promoter(~3kb upstream of the start codon) under the genetic background of Williams 82. Line 11	TTTCAACACACTATGCGAGAAGGAAATTTGTATGGAGATTTTCTAGTAAAGAAAGGCTCTTCGTCTCAACATGTCTTTACTGTTTTCTTCTCTTGTCCAGAGGCCTTAGTTCATACTTTTGCTGCATATGAATGAGGCACCCTCTTTACTCGTTTGTAATCTCGCCTTTACTTTTCATACTCAATAAAAAAAAACTACCCAACCTAACCTTAATCAGCTTGATTTGCTTTGGGTTGTTTACAAAAAACAACATATTTTACCCAACCCAACTCAATTCTATTTTATTAGGTTGGATCATAAAATAGACGAAATCTGACTTACTCGTGCCCCTGACATCTATTGTAGCTGTGATGCAATTAAGTATATCATAAAAAAATTGATGTTGCAACTTTAATTGTG…
OC-5	GFP-fused GmGRF5a overaxpression plant driven by GmCAB3 promoter(a constitutive promoter) under the genetic background of Williams 82. Line 5	gaattcctcgagagctagtggactagagacTGCCACATaagaatagtaaacgttaaaaccaaaatctcaaaaatCCAATgagtaaagagatatagattacttcatagataacaaacgttactcgcaattttccctcgagagctagtggactagagacTGCCACATaagaatagtaaacgttaaaaccaaaatctcaaaaatCCAATgagtaaagagatatagattacttcatagataacaaacgttactcgcaattttccctgcagCACAATCCCACTATCCTTCGCAAGACCCTTCCTCTATATAAGGAAGTTCATTTCATTTGGAGAGaagctt. Red is the sequence of CAB3, green is the sequence of mini 35…
OC-6	GFP-fused GmGRF5a overaxpression plant driven by GmCAB3 promoter(a constitutive promoter) under the genetic background of Williams 82. Line 10	gaattcctcgagagctagtggactagagacTGCCACATaagaatagtaaacgttaaaaccaaaatctcaaaaatCCAATgagtaaagagatatagattacttcatagataacaaacgttactcgcaattttccctcgagagctagtggactagagacTGCCACATaagaatagtaaacgttaaaaccaaaatctcaaaaatCCAATgagtaaagagatatagattacttcatagataacaaacgttactcgcaattttccctgcagCACAATCCCACTATCCTTCGCAAGACCCTTCCTCTATATAAGGAAGTTCATTTCATTTGGAGAGaagctt. Red is the sequence of CAB3, green is the sequence of mini 35…
OC-8	GFP-fused GmGRF5a overaxpression plant driven by GmCAB3 promoter(a constitutive promoter) under the genetic background of Williams 82. Line 8	gaattcctcgagagctagtggactagagacTGCCACATaagaatagtaaacgttaaaaccaaaatctcaaaaatCCAATgagtaaagagatatagattacttcatagataacaaacgttactcgcaattttccctcgagagctagtggactagagacTGCCACATaagaatagtaaacgttaaaaccaaaatctcaaaaatCCAATgagtaaagagatatagattacttcatagataacaaacgttactcgcaattttccctgcagCACAATCCCACTATCCTTCGCAAGACCCTTCCTCTATATAAGGAAGTTCATTTCATTTGGAGAGaagctt. Red is the sequence of CAB3, green is the sequence of mini 35…
OC-10	GFP-fused GmGRF5a overaxpression plant driven by GmCAB3 promoter(a constitutive promoter) under the genetic background of Williams 82. Line 10	gaattcctcgagagctagtggactagagacTGCCACATaagaatagtaaacgttaaaaccaaaatctcaaaaatCCAATgagtaaagagatatagattacttcatagataacaaacgttactcgcaattttccctcgagagctagtggactagagacTGCCACATaagaatagtaaacgttaaaaccaaaatctcaaaaatCCAATgagtaaagagatatagattacttcatagataacaaacgttactcgcaattttccctgcagCACAATCCCACTATCCTTCGCAAGACCCTTCCTCTATATAAGGAAGTTCATTTCATTTGGAGAGaagctt. Red is the sequence of CAB3, green is the sequence of mini 35…
G2 or 35S:GmGRF5a-MYC-2	3×MYC fused GmGRF5a overaxpression plant driven by CaMV 35S promoter under the genetic background of Tianlong1. Line 2	GAGACTTTTCAACAAAGGGTAATATCCGGAAACCTCCTCGGATTCCATTGCCCAGCTATCTGTCACTTTATTGTGAAGATAGTGGAAAAGGAAGGTGGCTCCTACAAATGCCATCATTGCGATAAAGGAAAGGCCATCGTTGAAGATGCCTCTGCCGACAGTGGTCCCAAAGATGGACCCCCACCCACGAGGAGCATCGTGGAAAAAGAAGACGTTCCAACCACGTCTTCAAAGCAAGTGGATTGATGTGATATCTCCACTGACGTAAGGGATGACGCACAATCCCACTATCCTTCGCAAGACCCTTCCTCTATATAAGGAAGTTCATTTCATTTGGAGAGAACA
G3 or 35S:GmGRF5a-MYC-3	3×MYC fused GmGRF5a overaxpression plant driven by CaMV 35S promoter under the genetic background of Tianlong1. Line 3	GAGACTTTTCAACAAAGGGTAATATCCGGAAACCTCCTCGGATTCCATTGCCCAGCTATCTGTCACTTTATTGTGAAGATAGTGGAAAAGGAAGGTGGCTCCTACAAATGCCATCATTGCGATAAAGGAAAGGCCATCGTTGAAGATGCCTCTGCCGACAGTGGTCCCAAAGATGGACCCCCACCCACGAGGAGCATCGTGGAAAAAGAAGACGTTCCAACCACGTCTTCAAAGCAAGTGGATTGATGTGATATCTCCACTGACGTAAGGGATGACGCACAATCCCACTATCCTTCGCAAGACCCTTCCTCTATATAAGGAAGTTCATTTCATTTGGAGAGAACA
35S:GmGRF5b-FLAG-1	3×FLAG fused GmGRF5b overaxpression plant driven by CaMV 35S promoter under the genetic background of Tianlong1. Line 1	GAGACTTTTCAACAAAGGGTAATATCCGGAAACCTCCTCGGATTCCATTGCCCAGCTATCTGTCACTTTATTGTGAAGATAGTGGAAAAGGAAGGTGGCTCCTACAAATGCCATCATTGCGATAAAGGAAAGGCCATCGTTGAAGATGCCTCTGCCGACAGTGGTCCCAAAGATGGACCCCCACCCACGAGGAGCATCGTGGAAAAAGAAGACGTTCCAACCACGTCTTCAAAGCAAGTGGATTGATGTGATATCTCCACTGACGTAAGGGATGACGCACAATCCCACTATCCTTCGCAAGACCCTTCCTCTATATAAGGAAGTTCATTTCATTTGGAGAGAACA
35S:GmGRF5b-FLAG-2	3×FLAG fused GmGRF5b overaxpression plant driven by CaMV 35S promoter under the genetic background of Tianlong1. Line 2	GAGACTTTTCAACAAAGGGTAATATCCGGAAACCTCCTCGGATTCCATTGCCCAGCTATCTGTCACTTTATTGTGAAGATAGTGGAAAAGGAAGGTGGCTCCTACAAATGCCATCATTGCGATAAAGGAAAGGCCATCGTTGAAGATGCCTCTGCCGACAGTGGTCCCAAAGATGGACCCCCACCCACGAGGAGCATCGTGGAAAAAGAAGACGTTCCAACCACGTCTTCAAAGCAAGTGGATTGATGTGATATCTCCACTGACGTAAGGGATGACGCACAATCCCACTATCCTTCGCAAGACCCTTCCTCTATATAAGGAAGTTCATTTCATTTGGAGAGAACA
Gmgrf5aD	GmGRF5a knockout single mutant by CRISPR/Cas9 under the genetic background of Williams 82	Ref to Fig. S2
Gmgrf5a-1	GmGRF5a knockout single mutant by CRISPR/Cas9 under the genetic background of Williams 82	Ref to Fig. S2
Gmgrf5b-1	GmGRF5b knockout single mutant by CRISPR/Cas9 under the genetic background of Williams 82	Ref to Fig. S2
Gmgrf5b-2	GmGRF5b knockout single mutant by CRISPR/Cas9 under the genetic background of Williams 82	Ref to Fig. S2
Gmgrf5a-2 Gmgrf5b-3	GmGRF5a andGmGRF5b knockout double mutant by CRISPR/Cas9 under the genetic background of Williams 82	Ref to Fig. S2
Gmgrf5a-3 Gmgrf5b-4	GmGRF5a andGmGRF5b knockout double mutant by CRISPR/Cas9 under the genetic background of Williams 82	Ref to Fig. S2
Gmgrf5a-5 Gmgrf5b-5	GmGRF5a andGmGRF5b knockout double mutant by CRISPR/Cas9 under the genetic background of Williams 82	Ref to Fig. S2
Gmlhy1a1b2a2b	GmLHY1a, GmLHY1b, GmLHY2a, and GmLHY2b knockout quadruple mutant by CRISPR/Cas9 under the genetic background of Williams 82	Lu et al., 2017; Cheng et al., 2019; Bu et al., 2021
Gmj1j2j3	GmELF3a, GmELF3b-1, and GmELF3b-2 knockout triple mutant by CRISPR/Cas9 under the genetic background of Williams 82	Lu et al., 2017; Cheng et al., 2019; Bu et al., 2021
Gmlux1 lux2	GmLUX1and GmLUX2 knockout double mutant by CRISPR/Cas9 under the genetic background of Williams 82	Lu et al., 2017; Cheng et al., 2019; Bu et al., 2021
[truncated: 5,000 more columns]
