# Supplementary material for: GRF5 mediates circadian clock to gate seed quality in soybean
Source: Research Square preprint supplement (doi:10.21203/rs.3.rs-5535877/v1), 2025-03-05
Supplement: Supplementary file 5 [file 9db6f10f12eb978faee35b56.xlsx]

## Sheet: Sheet1
Primer name	Seuqence 5'--3'	Function
GmGRF5a/b-T1-F	GATTAGCACATTAGAGAAATAGAG	Cas9 for knocking out GmGRF5a/GmGRF5b
GmGRF5a/b-T1-R	AAACCTCTATTTCTCTAATGTGCT	Cas9 for knocking out GmGRF5a/GmGRF5b
GmGRF5a/b-T2-F	ATTTGTGAAAGACACATGCACAG	Cas9 for knocking out GmGRF5a/GmGRF5b
GmGRF5a/b-T2-R	AACCTGTGCATGTGTCTTTCACA	Cas9 for knocking out GmGRF5a/GmGRF5b
GmGRF5a/b-T3-F	GTGGCCACTCCCCAAAGAAAGT	Cas9 for knocking out GmGRF5a/GmGRF5b
GmGRF5a/b-T3-R	TTTCTTTGGGGAGTGGCCACaa	Cas9 for knocking out GmGRF5a/GmGRF5b
GmGRF5a-cr-F	GAGACAAGGGCAGCAACAAA	Screening and identification of Cas9 mutants
GmGRF5a-cr-R	CCACCAGCTCACAATAATAACTATTG	Screening and identification of Cas9 mutants
GmGRF5a1707-cr-F	CAAGGCTCTTCCCACATCAT	Screening and identification of Cas9 mutants
GmGRF5b-cr-F	GCAACCAGTAGTATTCCTGG	Screening and identification of Cas9 mutants
GmGRF5b-cr-R	CTCTCTCTCTCTCTCTTGGC	Screening and identification of Cas9 mutants
GmGRF5b1199-cr-F	GGCTCTTCCCACATCATC	Screening and identification of Cas9 mutants
gGmGRF5a-F	CTTTAGATCTtctagaGAATCAGTAGCACCCGTACGTATG	GmGRF5a genomic gene clone to create overexpression plants
gGmGRF5a-R	cgacGGTACCggatccTTCATCTGCCAAGGATAAAGGAGACTACA	GmGRF5a genomic gene clone to create overexpression plants
GmGRF5aTer-F	GGCAGATGAAggatccTGTTTTTTCAATAGTTATTATTGTGAGCTGGTGGA	GmGRF5a terminator clone to create overexpression plants
GmGRF5aTer-R	cgacGGTACCggatcTACTACTCAAATGCACCCCAAATAAGATAAAGT	GmGRF5a terminator clone to create overexpression plants
gGmGRF5b-F	CTTTAGATCTtctagaCTTGAGTTGAAGCGGTCTATTTG	GmGRF5b genomic gene clone to create overexpression plants
gGmGRF5b-R	cgacGGTACCggatccTTCATCTGCCAAGGATAAAGGAGACTACA	GmGRF5b genomic gene clone to create overexpression plants
GmGRF5bTer-F	GGCAGATGAAggatccTGTTTTTTTTCTAGTTATTATTATGAGCTGGTGCATACG	GmGRF5b terminator clone to create overexpression plants
GmGRF5bTer-R	cgacGGTACCggatcGAAGTGCCAGCCTGAAAGACTT	GmGRF5b terminator clone to create overexpression plants
GmGRF5apro-F	ggtcgacatgcatgaattcCAACACATTTTATAAATACAGAGGC	The promoter cloning for Dual-Luciferase assay
GmGRF5apro-R	ccgcaagcttggatccTTTGAGACAACAAAAGGAAGGAAGAG	The promoter cloning for Dual-Luciferase assay
GmCupin1apro-F	ggtcgacatgcatgaattcGGTCGTGAATACCCCTAT	The promoter cloning for Dual-Luciferase assay
GmCupin1apro-R	ccgcaagcttggatccAGTATATATATTATTGGACG	The promoter cloning for Dual-Luciferase assay
GmCupin1-5pro-F	ggtcgacatgcatgaattcTACAAAGTAATATGATACAA	The promoter cloning for Dual-Luciferase assay
GmCupin1-5pro-R	ccgcaagcttggatccAGTATATCTTAAATTCTTTA	The promoter cloning for Dual-Luciferase assay
GmMYC3apro-F	ggtcgacatgcatgaattcTTGACCAGTAGTTCAGTGC	The promoter cloning for Dual-Luciferase assay
GmMYC3apro-R	ccgcaagcttggatccCGACGTTGTAAGATGTATCAC	The promoter cloning for Dual-Luciferase assay
GmMYC3bpro-F	ggtcgacatgcatgaattcCACGTGAAGTGGAGAACA	The promoter cloning for Dual-Luciferase assay
GmMYC3bpro-R	ccgcaagcttggatccCTGCTTGAGTTGATGATTAGG	The promoter cloning for Dual-Luciferase assay
GmRPS4pro-F	ggtcgacatgcatgaattcGCCCGATTTGACACATAGAC	The promoter cloning for Dual-Luciferase assay
GmRPS4pro-R	ccgcaagcttggatccGGTCCATGATAGAACTCCACC	The promoter cloning for Dual-Luciferase assay
GmGOGAT2pro-F	ggtcgacatgcatgaattcCATGCATGCTAGTATTACGT	The promoter cloning for Dual-Luciferase assay
GmGOGAT2pro-R	ccgcaagcttggatccGTTTTTTCCGTTTGGCGATG	The promoter cloning for Dual-Luciferase assay
GmTPA10pro-F	ggtcgacatgcatgaattcCAGGTTCTTGAAATGGATGG	The promoter cloning for Dual-Luciferase assay
GmTPA10pro-R	ccgcaagcttggatccACCGACCGAAGAAGAATATC	The promoter cloning for Dual-Luciferase assay
GmKCS5pro-F	ggtcgacatgcatgaattcGAGGTATTGAGCTGTAAGAAC	The promoter cloning for Dual-Luciferase assay
GmKCS5pro-R	ccgcaagcttggatcAGAGAAGAAGGTGCTTGAAT	The promoter cloning for Dual-Luciferase assay
GmMGD1pro-F	ggtcgacatgcatgaattcCGGCTAGAAGATAATGTTGGA	The promoter cloning for Dual-Luciferase assay
GmMGD1pro-R	ccgcaagcttggatcCTTTCTGTACTTGCCTTTGG	The promoter cloning for Dual-Luciferase assay
GmPXA1pro-F	ggtcgacatgcatgaattcTCGTGATTCGTCATTCTTG	The promoter cloning for Dual-Luciferase assay
GmPXA1pro-R	ccgcaagcttggatcTATCATTAACCATGCTCCAG	The promoter cloning for Dual-Luciferase assay
GmPEX16pro-F	ggtcgacatgcatgaattcGGACCACCATCATAGAAGG	The promoter cloning for Dual-Luciferase assay
GmPEX16pro-R	ccgcaagcttggatcAATCTGAAGGTATTGGAAGC	The promoter cloning for Dual-Luciferase assay
GmUKN2-qF	AGACTAAGGAGCTTGAATTC	RT-qPCR
GmUKN2-qR	GCTGACTTGACCTCTTC	RT-qPCR
GmPP2A-qF	TATTAGCAAGTCAATTGGGGGT	RT-qPCR
GmPP2A-qR	TCGAATGAACCTTGTCCTGTAA	RT-qPCR
GmLHY1a-qF	AAAGAAAATAAGGATGAGAACCACG	RT-qPCR
GmLHY1a-qR	TCCCAGTGGCACAGACATTG	RT-qPCR
GmLHY1b-qF	TTGAAGCTTTGAAACTACACGG	RT-qPCR
GmLHY1b-qR	ACTATGTAATGATGCGCTACCA	RT-qPCR
GmLHY2a-qF	CGAGCTTAGTAATCGTCGTAGT	RT-qPCR
GmLHY2a-qR	GAGTAGGTGAAAAGCTTTGTGG	RT-qPCR
GmLHY2b-qF	CACTGGACTTGGAGAAAGAACC	RT-qPCR
GmLHY2b-qR	GGGTGCCTCTTGGATAATGG	RT-qPCR
GmLUX1-qF	TGAATGACCTTCAAATACGGGA	RT-qPCR
GmLUX1-qR	AGATACTTCAAGCTCGGAACAA	RT-qPCR
GmLUX2-qF	GCCGACTCCTATTGACTCAATA	RT-qPCR
GmLUX2-qR	ATCCGATAAAACTGCAACATCG	RT-qPCR
GmTOC1a-qF	AAACTGTCATGCTTGTTCTCAC	RT-qPCR
GmTOC1a-qR	CATCACCAAAATCCAAGTCTGG	RT-qPCR
GmTOC1b-qF	CACTAAAACTGTCGTGTTGAGG	RT-qPCR
GmTOC1b-qR	GAGTGACGGATCATTCTTTTGG	RT-qPCR
GmTOC1-3-qF	CTTTACTCACTTTCCTTGTCGC	RT-qPCR
GmTOC1-3-qR	CTGAAACTGAAACTGAAACGGT	RT-qPCR
GmTOC1-4-qF	AATGGTCATGGTCATGGGCA	RT-qPCR
GmTOC1-4-qR	ATGATGGTGATGGCTGACCT	RT-qPCR
GmELF3a-qF	CGTGCCTCATAACCGAAGAT	RT-qPCR
GmELF3a-qR	CTCGTTACATGACATACTCC	RT-qPCR
GmELF3ba-qF	TGTGTAGAGATATGTCGTAGTG	RT-qPCR
GmELF3ba-qR	GAAGAATAAGAAGGAGGAGTTG	RT-qPCR
GmELF3bb-qF	GGAGCCGATTTTAACACTCATC	RT-qPCR
GmELF3bb-qR	TTTCAACAGCGTGAAGAGAAAG	RT-qPCR
GmELF4a-qF	CGTGTCTGTGTCTATTGTC	RT-qPCR
GmELF4a-qR	GCAGAGAAAGAAGTAAAGAGG	RT-qPCR
GmELF4b-qF	CACAGCAGAAATCAGAACTCAC	RT-qPCR
GmELF4b-qR	ATGGTAGGACGCGACAATATAG	RT-qPCR
GmCupin1a-qF	AGTGTTACGGTCTACCAGA	RT-qPCR
GmCupin1a-qR	CAACAACGTGATACCTCTTAG	RT-qPCR
GmCupin1-5-qF	CTTCAGAATCTCCGAGACTACC	RT-qPCR
GmCupin1-5-qR	TTGAAGGTTGTAAGAGTCTCGG	RT-qPCR
GmMYC3a-qF	CTCACTCGTTCTGTCCCTAAAA	RT-qPCR
GmMYC3a-qR	GATTCATTCGCTGACTGAGTTG	RT-qPCR
GmMYC3b-qF	CCATATCTTACATCACGGAGCT	RT-qPCR
GmMYC3b-qR	AACTACTACTATTACCCGCGTG	RT-qPCR
GmRPS4-qF	CGCGTCTGCTATATTCATGAAG	RT-qPCR
GmRPS4-qR	CGGCAAAAACCAACTCTTAAGT	RT-qPCR
GmGOGAT2-qF	ATCTAAGGGTGCAAGGTTA	RT-qPCR
GmGOGAT2-qR	TCATTCCACACAATGCCA	RT-qPCR
GmTPA10-qF	CAGTACATGCAACGTATCGATG	RT-qPCR
GmTPA10-qR	AAGAGTGGGGAGTTCTTGTAAG	RT-qPCR
GmKCS5-qF	TTTGTGCAACATGTACGTAAGG	RT-qPCR
GmKCS5-qR	GCACTTCATTTTGGTCATGCTA	RT-qPCR
GmMGD1-qF	TCCAAAGTCCGAGATTGAATCA	RT-qPCR
GmMGD1-qR	CATAATCTTTGGCGTCTTGGTC	RT-qPCR
GmPXA1-qF	AGATGAAACTCTCAAGAGTCAC	RT-qPCR
GmPXA1-qR	GTCGGGTCACAACGCTAA	RT-qPCR
GmPEX16-qF	CGTTGAGTTTCTGAAGCTATCG	RT-qPCR
GmPEX16-qR	CAGAAAACCGTTCAGGAAGAAG	RT-qPCR
GmWRI1a-qF	CCGTTGTCGAAAGAAGAAA	RT-qPCR
GmWRI1a-qR	CCCAAGAATAGGAATGGTTT	RT-qPCR
GmWRI1b-qF	CTGGTCACAATTATGGAGCATG	RT-qPCR
GmWRI1b-qR	AGCCAAGTTTGGATCTTGAAAC	RT-qPCR
GmCGI-58a-qF	AAGAGATAACCAAGAACGACGT	RT-qPCR
GmCGI-58a-qR	TGAACATAACCAGTCTTGACGA	RT-qPCR
GmCGI-58b-qF	CAGAAGACATTGGGAAAAGCAA	RT-qPCR
GmCGI-58b-qR	GCGTTTTTCAGCATTGATGATG	RT-qPCR
GmOLE1c-qF	GAGGCAAGGGATGTAAAGAGAA	RT-qPCR
GmOLE1c-qR	ACAACAACACATTAATGCTCCC	RT-qPCR
GmGRF5a-qF	AGCTAGGAGCTACACTGAATC	RT-qPCR
GmGRF5a-qR	CTCTGACCCGTAGCTGTCT	RT-qPCR
GmGRF5b-qF	ACATAACACCACCACCAC	RT-qPCR
GmGRF5b-qR	AATAAGAGCCAGCAGAGTC	RT-qPCR
GmCupin1a-P1-qF	GAATCTTAGAGAACCGTTAGAG	ChIP-qPCR
GmCupin1a-P1-qR	CCAACTGTGAATAACTCATCC	ChIP-qPCR
GmCupin1a-P2-qF	TGAATCAGGAGGGAGAGG	ChIP-qPCR
GmCupin1a-P2-qR	GGCTTAAAGGAGCACTCA	ChIP-qPCR
GmCupin1-5-P3-qF	CGCACTGCATCTGTTGAG	ChIP-qPCR
GmCupin1-5-P3-qR	AGCGAGACCACTTATCACT	ChIP-qPCR
GmCupin1-5-P4-qF	AAGTGACTCCTGGGTTGGC	ChIP-qPCR
GmCupin1-5-P4-qR	TGTATCAACTTCTTGCGACAGT	ChIP-qPCR
GmCupin1-5-P5-qF	GTAACAGTCCGTACTAATCAG	ChIP-qPCR
GmCupin1-5-P5-qR	TGCAAAGGATACTCTCATTG	ChIP-qPCR
GmTPA10-P6-qF	CAGCCTCTAGTATCATAGCA	ChIP-qPCR
GmTPA10-P6-qR	GCGTAAACCCTAAGACATAA	ChIP-qPCR
GmTPA10-P7-qF	CATCATGGTTCTCAGAATTG	ChIP-qPCR
GmTPA10-P7-qR	GGGATTAAACTGACTAGACA	ChIP-qPCR
GmGOGAT2-P8-qF	CGTCGTTATTGATACCTCAT	ChIP-qPCR
GmGOGAT2-P8-qR	CCCAAGTATTTGTTGTCAGA	ChIP-qPCR
GmGOGAT2-P9-qF	CAAATTCCACCATAACTTCC	ChIP-qPCR
GmGOGAT2-P9-qR	CGATAACCACATTCTTAGGA	ChIP-qPCR
GmMYC3a-P10-qF	ATCCATTTCGCTTGTAAACC	ChIP-qPCR
GmMYC3a-P10-qR	GGCGATTGTGTCTATACTCT	ChIP-qPCR
GmMYC3a-P11-qF	GTGGCTTTGACAGGGAAA	ChIP-qPCR
GmMYC3a-P11-qR	TATTGCGTGATTACGAAACC	ChIP-qPCR
GmMYC3a-P12-qF	CTTTATTGCCACTCGTAACA	ChIP-qPCR
GmMYC3a-P12-qR	GATGGTTGTGATCAAGTCAG	ChIP-qPCR
GmMYC3b-P13-qF	CATAGACTCATCGTGGTACAT	ChIP-qPCR
GmMYC3b-P13-qR	CCTACAGGTTAGTGAAATTGTG	ChIP-qPCR
GmMYC3b-P14-qF	TTATCACTAGGTGTCCTGTG	ChIP-qPCR
GmMYC3b-P14-qR	AGCAACATATCAAGTCACTG	ChIP-qPCR
GmRPS4-P15-qF	AATACGCTTGGTGGTAGTC	ChIP-qPCR
GmRPS4-P15-qR	GGGAATGACAATAGTAATGTCC	ChIP-qPCR
GmRPS4-P16-qF	ATACCTGACCCTAACCTTGA	ChIP-qPCR
GmRPS4-P16-qR	GGATACATCTTAGCCTTGACT	ChIP-qPCR
GmGRF5acds-F	atgggtcgcggatccgaattcATGAGTGCAAGTGCAAGA	The GmGRF5a's CDS cloning for EMSA
GmGRF5acds-R	tggtggtggtggtgctcgagTTCATCGGTTTGGATTCTG	The GmGRF5a's CDS cloning for EMSA
GmLHY1a/1bcds-F	atgggtcgcggatccgaattcATGGACGCATACTCCTCC	The GmLHY1a's or GmLHY1b's CDS cloning for EMSA
GmLHY1a/1bcds-R	tggtggtggtggtgctcgagAGTCGAAGTCTCCCCTTC	The GmLHY1a's or GmLHY1b's CDS cloning for EMSA
GmLHY2acds-F	atgggtcgcggatccgaattcATGCATGATCGCACCTTC	The GmLHY2a's CDS cloning for EMSA
GmLHY2acds-R	tggtggtggtggtgctcgagAGTTGAAGCCTCCCCATT	The GmLHY2a's CDS cloning for EMSA
GmLHY2bcds-F	atgggtcgcggatccgaattcATGGACGCCGACTCCTCT	The GmLHY2b's CDS cloning for EMSA
GmLHY2bcds-R	tggtggtggtggtgctcgagAGTTGAAGCCTCCCCATT	The GmLHY2b's CDS cloning for EMSA
GmLUX1/2cds-F	atgggtcgcggatccgaattcATGGGGGAAGAGGTGAAG	The GmLUX1's or GmLUX2's CDS cloning for EMSA
GmLUX1/2cds-R	tggtggtggtggtgctcgagTTTATCATTAGGAGCAAGGTGA	The GmLUX1's or GmLUX2's CDS cloning for EMSA
BioGmGRF5-1-LUXbs-F	GTACGTATGCAGCAATCATGAACAGGATTCGTTTTTAAGCAAATGCTTTGACAATT	Biotin-labeled probe for combining GmLUX1/GmLUX2 proteins in EMSA
UnbioGmGRF5-1-LUXbs-F	GTACGTATGCAGCAATCATGAACAGGATTCGTTTTTAAGCAAATGCTTTGACAATT	Unbiotin-labeled probe for combining GmLUX1/GmLUX2 proteins in EMSA
UnbioGmGRF5-1-LUXbs-R	AATTGTCAAAGCATTTGCTTAAAAACGAATCCTGTTCATGATTGCTGCATACGTAC	Unbiotin-labeled probe for combining GmLUX1/GmLUX2 proteins in EMSA
BioGmGRF5-1-EEbs-F	AGTAAAGACTAAAGAGGCTCCCAGGTGATATTTTGAAGCCTGCACCCAGTCAGCCAGC	Biotin-labeled probe for combining GmLUX1/GmLUX2 proteins in EMSA
UnbioGmGRF5-1-EEbs-F	AGTAAAGACTAAAGAGGCTCCCAGGTGATATTTTGAAGCCTGCACCCAGTCAGCCAGC	Unbiotin-labeled probe for combining GmLUX1/GmLUX2 proteins in EMSA
UnbioGmGRF5-1-EEbs-R	GCTGGCTGACTGGGTGCAGGCTTCAAAATATCACCTGGGAGCCTCTTTAGTCTTTACT	Unbiotin-labeled probe for combining GmLUX1/GmLUX2 proteins in EMSA
BioGmGRF5-1-CCA1bs-F	AACGTTATGTAATTTAATTTTATCGAAAAAATCTACAAAATTGATAAAATAAGATATTT	Biotin-labeled probe for combining GmLHY1a/GmLHY1b/GmLHY2a/GmLHY2b proteins in EMSA
UnbioGmGRF5-1-CCA1bs-F	AACGTTATGTAATTTAATTTTATCGAAAAAATCTACAAAATTGATAAAATAAGATATTT	Unbiotin-labeled probe for combining GmLHY1a/GmLHY1b/GmLHY2a/GmLHY2b proteins in EMSA
UnbioGmGRF5-1-CCA1bs-R	AAATATCTTATTTTATCAATTTTGTAGATTTTTTCGATAAAATTAAATTACATAACGTT	Unbiotin-labeled probe for combining GmLHY1a/GmLHY1b/GmLHY2a/GmLHY2b proteins in EMSA
BioGmCupin1-1-F	CTAAGCGCCTCAGGGTGGTTTTTCACTGACATGGTACCACATTGCATATAGGATT	Biotin-labeled probe for combining GmGRF5a proteins in EMSA
UnbioGmCupin1-1-F	CTAAGCGCCTCAGGGTGGTTTTTCACTGACATGGTACCACATTGCATATAGGATT	Unbiotin-labeled probe for combining GmGRF5a proteins in EMSA
UnbioGmCupin1-1-R	AATCCTATATGCAATGTGGTACCATGTCAGTGAAAAACCACCCTGAGGCGCTTAG	Unbiotin-labeled probe for combining GmGRF5a proteins in EMSA
BioGmCupin1-5-F	ATTAATCTTGGTAGTCTCGAATGCCACAACACTGACTAGTCTCTTGGATCATAAG	Biotin-labeled probe for combining GmGRF5a proteins in EMSA
UnbioGmCupin1-5-F	ATTAATCTTGGTAGTCTCGAATGCCACAACACTGACTAGTCTCTTGGATCATAAG	Unbiotin-labeled probe for combining GmGRF5a proteins in EMSA
UnbioGmCupin1-5-R	CTTATGATCCAAGAGACTAGTCAGTGTTGTGGCATTCGAGACTACCAAGATTAAT	Unbiotin-labeled probe for combining GmGRF5a proteins in EMSA
BioGmTPA10-F	TTGAACTTTTTCAGAAGTATGTCTAGTCAGTTTAATCCCAAAATCGATGTACAAT	Biotin-labeled probe for combining GmGRF5a proteins in EMSA
UnbioGmTPA10-F	TTGAACTTTTTCAGAAGTATGTCTAGTCAGTTTAATCCCAAAATCGATGTACAAT	Unbiotin-labeled probe for combining GmGRF5a proteins in EMSA
UnbioGmTPA10-R	ATTGTACATCGATTTTGGGATTAAACTGACTAGACATACTTCTGAAAAAGTTCAA	Unbiotin-labeled probe for combining GmGRF5a proteins in EMSA
BioGmMYC3-1-F	AATTTTTTTTATCCTATGAATATTGCTGACTTGATCACAACCATCTTTTTTAAAC	Biotin-labeled probe for combining GmGRF5a proteins in EMSA
UnbioGmMYC3-1-F	AATTTTTTTTATCCTATGAATATTGCTGACTTGATCACAACCATCTTTTTTAAAC	Unbiotin-labeled probe for combining GmGRF5a proteins in EMSA
UnbioGmMYC3-1-R	GTTTAAAAAAGATGGTTGTGATCAAGTCAGCAATATTCATAGGATAAAAAAAATT	Unbiotin-labeled probe for combining GmGRF5a proteins in EMSA
BioGmMYC3-2-F	GTAATTTTTTAAGTATACTATACCAGTGACTTGATATGTTGCTTATATTATAAAT	Biotin-labeled probe for combining GmGRF5a proteins in EMSA
UnbioGmMYC3-2-F	GTAATTTTTTAAGTATACTATACCAGTGACTTGATATGTTGCTTATATTATAAAT	Unbiotin-labeled probe for combining GmGRF5a proteins in EMSA
UnbioGmMYC3-2-R	ATTTATAATATAAGCAACATATCAAGTCACTGGTATAGTATACTTAAAAAATTAC	Unbiotin-labeled probe for combining GmGRF5a proteins in EMSA
BioGmRPS4-F	GGGGTCGTGGCATGAAATGGCATACCTGACCCTAACCTTGACCTCACTTTTTTGA	Biotin-labeled probe for combining GmGRF5a proteins in EMSA
UnbioGmRPS4-F	GGGGTCGTGGCATGAAATGGCATACCTGACCCTAACCTTGACCTCACTTTTTTGA	Unbiotin-labeled probe for combining GmGRF5a proteins in EMSA
UnbioGmRPS4-R	TCAAAAAAGTGAGGTCAAGGTTAGGGTCAGGTATGCCATTTCATGCCACGACCCC	Unbiotin-labeled probe for combining GmGRF5a proteins in EMSA
BioGmGOGAT2-F	ATCCAACGAAAGTAAATTGAACAAGCTGACTTAAACATAAAAGCTAGCAAAAGCT	Biotin-labeled probe for combining GmGRF5a proteins in EMSA
UnbioGmGOGAT2-F	ATCCAACGAAAGTAAATTGAACAAGCTGACTTAAACATAAAAGCTAGCAAAAGCT	Unbiotin-labeled probe for combining GmGRF5a proteins in EMSA
UnbioGmGOGAT2-R	AGCTTTTGCTAGCTTTTATGTTTAAGTCAGCTTGTTCAATTTACTTTCGTTGGAT	Unbiotin-labeled probe for combining GmGRF5a proteins in EMSA
