# Supplementary material for: GRF5 mediates circadian clock to gate seed quality in soybean
Source: Research Square preprint supplement (doi:10.21203/rs.3.rs-5535877/v1), 2025-03-05
Supplement: Supplementary file 6 [file d43c421ea47383f2a949cdca.xlsx]

## Sheet: Sheet1
	Score from DAP-seq	Arabidopsis ID	Annotation from website
Glyma.19G063400	8.73	NA	Oleosin_family_protein
Glyma.18G242100	6.32	NA	Putative_adipose-regulatory_protein_(Seipin)
Glyma.08G167100	3.67	ATMST1,ATRDH1,MST1,ST1,STR1	mercaptopyruvate_sulfurtransferase_1
Glyma.15G260300	9.03	ATMST1,ATRDH1,MST1,ST1,STR1	mercaptopyruvate_sulfurtransferase_1
Glyma.03G260900	6.92	NA	60S_acidic_ribosomal_protein_family
Glyma.02G255500	6.92	NA	Ribosomal_protein_L10_family_protein
Glyma.06G138400	5.42	PGY2	Ribosomal_protein_L6_family
Glyma.07G060000	11.66	OLI7,RPL5B	ribosomal_protein_L5_B
Glyma.20G168100	9.63	ARP1,emb2207,RP1,RPL3A	ribosomal_protein_1
Glyma.05G067400	5.77	NA	Zinc-binding_ribosomal_protein_family_protein
Glyma.10G291500	8.43	NA	Ribosomal_L29_family_protein_
Glyma.08G114100	5.72	NA	Ribosomal_protein_L32e
Glyma.08G030900	9.93	NA	Ribosomal_protein_L31e_family_protein
Glyma.02G002300	2.71	NA	Ribosomal_protein_L7Ae/L30e/S12e/Gadd45_family_protein
Glyma.02G038700	10.54	NA	Ribosomal_protein_L18e/L15_superfamily_protein
Glyma.13G243100	7.81	NA	Translation_protein_SH3-like_family_protein
Glyma.10G039900	8.47	emb2171	Ribosomal_protein_L14p/L23e_family_protein
Glyma.13G126400	7.53	NA	Ribosomal_protein_L14p/L23e_family_protein
Glyma.11G249700	6.92	NA	Ribosomal_protein_L22p/L17e_family_protein
Glyma.05G146800	8.13	NA	Ribosomal_protein_L22p/L17e_family_protein
Glyma.17G143200	17.46	NA	Ribosomal_protein_L23/L15e_family_protein
Glyma.16G106300	7.83	ATBBC1,BBC1,RSU2	breast_basic_conserved_1
Glyma.04G122700	6.92	ATBBC1,BBC1,RSU2	breast_basic_conserved_1
Glyma.04G224000	6.02	RPL10B	Ribosomal_protein_L16p/L10e_family_protein
Glyma.16G127500	8.73	NA	Ribosomal_protein_S4_(RPS4A)_family_protein
Glyma.13G300200	2.71	NA	Nucleic_acid-binding,_OB-fold-like_protein
Glyma.16G148500	5.72	ARS27A,RS27A	ribosomal_protein_S27
Glyma.06G011000	4.69	NA	Ribosomal_protein_S25_family_protein
Glyma.03G142300	6.32	NA	Ribosomal_protein_S10p/S20e_family_protein
Glyma.03G241100	8.13	NA	Ribosomal_protein_S11_family_protein
Glyma.08G217700	9.33	NA	Ribosomal_protein_L7Ae/L30e/S12e/Gadd45_family_protein
Glyma.17G105900	6.92	RPS11-BETA	ribosomal_protein_S11-beta
Glyma.14G196700	7.12	NA	Ribosomal_protein_L7Ae/L30e/S12e/Gadd45_family_protein
Glyma.07G092900	9.63	NA	Ribosomal_protein_S7e_family_protein
Glyma.09G183300	8.43	NA	Ribosomal_protein_S7e_family_protein
Glyma.19G049200	12.34	NA	Ribosomal_protein_S7e_family_protein
Glyma.20G084000	6.32	RUXF	small_nuclear_ribonucleoprotein_F
Glyma.05G146000	8.73	URE	urease
Glyma.09G044200	7.22	TCTP	translationally_controlled_tumor_protein
Glyma.04G165500	6.32	ATELF5A-1,EIF-5A,EIF5A,ELF5A-1	eukaryotic_elongation_factor_5A-1
Glyma.02G187100	6.62	ATEIF3E-1,ATINT6,EIF3E,INT-6,INT6,TIF3E1	eukaryotic_translation_initiation_factor_3E
Glyma.10G106100	2.89	ATEIF3E-1,ATINT6,EIF3E,INT-6,INT6,TIF3E1	eukaryotic_translation_initiation_factor_3E
Glyma.04G186000	8.43	NA	ATPase,_AAA-type,_CDC48_protein
Glyma.06G180000	5.72	NA	ATPase,_AAA-type,_CDC48_protein
Glyma.08G342300	4.69	ATKTI1,KTI1	kunitz_trypsin_inhibitor_1
Glyma.12G210000	6.92	NA	ketol-acid_reductoisomerase
Glyma.13G291300	9.33	NA	ketol-acid_reductoisomerase
Glyma.12G122900	6.92	NA	ketol-acid_reductoisomerase
Glyma.04G024300	6.92	NA	ER_lumen_protein_retaining_receptor_family_protein
Glyma.17G186600	3.47	NA	GTP_binding_Elongation_factor_Tu_family_protein
Glyma.09G155500	5.72	NA	Kunitz_family_trypsin_and_protease_inhibitor_protein
Glyma.16G206300	5.42	NA	NA
Glyma.20G045500	6.02	ATCYS6,ATCYSB,CYSB	cystatin_B
Glyma.10G241900	7.83	PRH75	DEAD_box_RNA_helicase_(PRH75)
Glyma.17G137800	22.88	BETA-VPE,BETAVPE	beta_vacuolar_processing_enzyme
Glyma.04G104600	9.93	SAH7	Pollen_Ole_e_1_allergen_and_extensin_family_protein
Glyma.06G105700	10.84	SAH7	Pollen_Ole_e_1_allergen_and_extensin_family_protein
Glyma.13G240600	6.32	ALN,ATALN	allantoinase
Glyma.05G152000	8.43	ATSAHH1,EMB1395,HOG1,MEE58,SAHH1	S-adenosyl-L-homocysteine_hydrolase
Glyma.11G117300	3.47	ATGRP7,CCR2,GR-RBP7,GRP7	cold,_circadian_rhythm,_and_rna_binding_2
Glyma.12G043000	6.62	ATGRP8,CCR1,GR-RBP8,GRP8	cold,_circadian_rhythm,_and_RNA_binding_1
Glyma.12G168500	5.42	NA	secE/sec61-gamma_protein_transport_protein
Glyma.13G268600	4.07	NA	SecY_protein_transport_family_protein
Glyma.12G230900	8.73	NA	SecY_protein_transport_family_protein
Glyma.02G141700	7.58	PSBW	photosystem_II_reaction_center_W
Glyma.10G032200	9.33	PSBW	photosystem_II_reaction_center_W
Glyma.01G180800	2.71	OEC33,PSBO-2,PSBO2	photosystem_II_subunit_O-2
Glyma.15G275600	6.32	NA	Photosystem_II_5_kD_protein
Glyma.11G181100	6.02	PSAO	photosystem_I_subunit_O
Glyma.03G109500	7.22	NDPK1	Nucleoside_diphosphate_kinase_family_protein
Glyma.11G099500	6.92	NA	NA
Glyma.02G005500	9.33	NA	Lactate/malate_dehydrogenase_family_protein
Glyma.03G262300	6.97	LHCA2	photosystem_I_light_harvesting_complex_gene_2
Glyma.11G192700	8.73	CSD2,CZSOD2	copper/zinc_superoxide_dismutase_2
Glyma.09G214500	10.24	ACBP,ACBP6	acyl-CoA-binding_protein_6
Glyma.19G120400	6.92	IMS1,IPMS2,MAML-3	2-isopropylmalate_synthase_1
Glyma.06G172600	8.73	GAPC-2,GAPC2	glyceraldehyde-3-phosphate_dehydrogenase_C2
Glyma.04G202900	8.73	ATCNX1,CNX1	calnexin_1
Glyma.14G040600	5.12	ACAM-2,CAM5	calmodulin_5
Glyma.20G226500	7.83	AN3,ATGIF1,GIF,GIF1	SSXT_family_protein
Glyma.09G171600	5.42	ANN5,ANNAT5	annexin_5
Glyma.03G185900	8.43	GAMMA-TIP,GAMMA-TIP1,TIP1;1	gamma_tonoplast_intrinsic_protein
Glyma.20G179700	4.07	PIP2;5,PIP2D	plasma_membrane_intrinsic_protein_2;5
Glyma.14G061500	6.89	PIP1;4,PIP1E,TMP-C	plasma_membrane_intrinsic_protein_1;4
Glyma.13G221100	7.22	UBL5	ubiquitin-like_protein_5
Glyma.06G110100	6.62	NA	NA
Glyma.13G270800	2.71	UBC13A,UBC35	ubiquitin-conjugating_enzyme_35
Glyma.11G140900	6.92	ATUBC7,UBC7	ubiquitin_carrier_protein_7
Glyma.18G216000	8.13	UBC28	ubiquitin-conjugating_enzyme_28
Glyma.06G190900	9.33	ATUBC2,UBC2	ubiquiting-conjugating_enzyme_2
Glyma.03G124400	2.71	TUB6	beta-6_tubulin
Glyma.04G088500	3.27	TUA2	tubulin_alpha-2_chain
Glyma.05G157300	7.53	TUA5	tubulin_alpha-5
Glyma.20G159200	5.55	TUB8	tubulin_beta_8
Glyma.19G210600	5.12	NA	HSP20-like_chaperones_superfamily_protein
Glyma.16G075400	2.8	ATSYP22,ATVAM3,SGR3,SYP22,VAM3	Syntaxin/t-SNARE_family_protein
Glyma.08G181000	5.72	NA	UDP-Glycosyltransferase_superfamily_protein
Glyma.08G320500	2.71	ATSUMO2,SUM2,SUMO_2,SUMO2	small_ubiquitin-like_modifier_2
Glyma.02G158200	10.54	NA	Proteinase_inhibitor,_propeptide
Glyma.19G098500	7.83	SRG3	senescence-related_gene_3
Glyma.06G276300	7.53	ATMBF1B,MBF1B	multiprotein_bridging_factor_1B
Glyma.08G042700	7.53	NA	NA
Glyma.01G186800	6.62	RALFL34	ralf-like_34
Glyma.10G097900	10.84	NA	NA
Glyma.02G134400	9.93	ATRBP47B,RBP47B	RNA-binding_protein_47B
Glyma.15G106900	8.43	ATRBP45B,RBP45B	RNA-binding_(RRM/RBD/RNP_motifs)_family_protein
Glyma.17G240400	7.83	ATPAB2,PAB2,PABP2	poly(A)_binding_protein_2
Glyma.11G176200	6.32	PY,THIC	thiaminC
Glyma.17G047600	10.24	UBP1B	oligouridylate_binding_protein_1B
Glyma.17G005600	13.25	L1L,NF-YB6	nuclear_factor_Y,_subunit_B6
Glyma.08G027900	8.13	NA	Mitochondrial_outer_membrane_translocase_complex,_subunit_Tom7
Glyma.13G116300	7.22	NA	Transmembrane_proteins_14C
Glyma.17G043500	2.89	NA	Transmembrane_proteins_14C
Glyma.07G260300	6.32	PRXR1	Peroxidase_superfamily_protein
Glyma.12G036700	11.74	NA	NAD(P)-linked_oxidoreductase_superfamily_protein
Glyma.01G242000	4.28	MGT4,MRS2-3	magnesium_transporter_4
Glyma.12G073100	15.35	APX1,ATAPX01,ATAPX1,CS1,MEE6	ascorbate_peroxidase_1
Glyma.11G241700	12.04	NA	Histone_superfamily_protein
Glyma.15G050600	4.07	emb1075	Pyridoxal_phosphate_(PLP)-dependent_transferases_superfamily_protein
Glyma.08G181700	10.84	emb1075	Pyridoxal_phosphate_(PLP)-dependent_transferases_superfamily_protein
Glyma.18G074100	7.22	AtHsp90.4,Hsp81.4	HEAT_SHOCK_PROTEIN_81.4
Glyma.07G049900	6.32	NA	UDP-Glycosyltransferase_superfamily_protein
Glyma.13G135500	7.53	GSTL3	Glutathione_S-transferase_family_protein
Glyma.10G291100	7.53	DHAR2	dehydroascorbate_reductase_2
Glyma.09G238300	13.85	GASA4	GAST1_protein_homolog_4
Glyma.05G026200	6.02	NA	Pyridine_nucleotide-disulphide_oxidoreductase_family_protein
Glyma.20G189600	5.33	CYP76C4	cytochrome_P450,_family_76,_subfamily_C,_polypeptide_4
Glyma.20G123600	7.83	NA	ATP_synthase_alpha/beta_family_protein
Glyma.03G096300	13.25	NA	FRIGIDA-like_protein
Glyma.20G146100	6.62	NA	FRIGIDA-like_protein
Glyma.10G293800	6.62	THFS	10-formyltetrahydrofolate_synthetase
Glyma.20G243700	6.02	THFS	10-formyltetrahydrofolate_synthetase
Glyma.06G120600	12.94	SKP2A	F-box/RNI-like_superfamily_protein
Glyma.11G154900	6.02	NA	NA
Glyma.06G044400	9.03	NA	Gibberellin-regulated_family_protein
Glyma.14G219700	8.43	AtHsp90-7,AtHsp90.7,HSP90.7,SHD	Chaperone_protein_htpG_family_protein
Glyma.15G008800	6.62	NA	Embryo-specific_protein_3,_(ATS3)
Glyma.U018200	6.02	ATRAB28,RAB28	responsive_to_abscisic_acid_28
Glyma.07G110200	7.22	ATJ2,J2	DNAJ_homologue_2
Glyma.03G116600	8.73	ATJ2,J2	DNAJ_homologue_2
Glyma.13G138200	49.34	NA	S1FA-like_DNA-binding_protein
Glyma.11G150300	7.53	NA	Disease_resistance-responsive_(dirigent-like_protein)_family_protein
Glyma.15G136100	4.9	NA	Coatomer_epsilon_subunit
Glyma.08G259200	8.73	ATCTL1,CTL1,ELP,ELP1,ERH2,HOT2,POM1	Chitinase_family_protein
Glyma.08G175900	9.63	NA	TCP-1/cpn60_chaperonin_family_protein
Glyma.06G091700	2.89	IAA8	indoleacetic_acid-induced_protein_8
Glyma.14G086300	5.72	NA	N-terminal_nucleophile_aminohydrolases_(Ntn_hydrolases)_superfamily_protein
Glyma.16G048100	4.07	NA	Glycosyl_hydrolase_family_38_protein
Glyma.19G028400	5.72	NA	Glycosyl_transferase,_family_35
Glyma.05G182600	8.13	AGT2	alanine:glyoxylate_aminotransferase_2
Glyma.06G150100	3.08	ACT7	actin_7
Glyma.04G215900	7.22	ACT7	actin_7
Glyma.08G146500	6.02	ACT7	actin_7
Glyma.18G289000	2.89	NA	ACT_domain-containing_protein
Glyma.13G271200	9.63	NA	Class_I_glutamine_amidotransferase-like_superfamily_protein
Glyma.06G236100	4.9	NA	ARM_repeat_superfamily_protein
Glyma.20G242600	2.71	NA	NA
Glyma.09G164000	38.35	NA	NA
Glyma.05G204700	6.92	ATUGE1,UGE1	UDP-D-glucose/UDP-D-galactose_4-epimerase_1
Glyma.20G206400	4.69	DAL,DAL1	differentiation_and_greening-like_1
Glyma.15G115000	7.83	NA	NA
Glyma.18G063700	5.12	NA	NA
Glyma.U012100	6.62	ATJ2,J2	DNAJ_homologue_2
Glyma.11G141000	9.33	NA	NA
Glyma.19G242200	7.83	PBG1	20S_proteasome_beta_subunit_G1
Glyma.01G067200	9.33	NA	GDSL-like_Lipase/Acylhydrolase_superfamily_protein
Glyma.08G342200	6.92	NA	Kunitz_family_trypsin_and_protease_inhibitor_protein
Glyma.12G107500	7.35	NA	NA
Glyma.15G003700	6.62	NA	Ribosomal_protein_L7Ae/L30e/S12e/Gadd45_family_protein
Glyma.06G138600	3.27	PGY2	Ribosomal_protein_L6_family
Glyma.03G206400	3.47	ATEIF3C-1,ATTIF3C1,EIF3C,EIF3C-1,TIF3C1	eukaryotic_translation_initiation_factor_3C
Glyma.03G163600	8.43	NA	ENTH/VHS/GAT_family_protein
Glyma.19G124600	7.83	ARAF,ARAF1,ASD1,ATASD1	alpha-L-arabinofuranosidase_1
Glyma.18G139400	9.03	ARFA1F,ATARFA1F	ADP-ribosylation_factor_A1F
Glyma.10G106400	7.83	NA	Calcium-binding_EF-hand_family_protein
Glyma.14G065900	6.62	CYT1,EMB101,GMP1,SOZ1,VTC1	Glucose-1-phosphate_adenylyltransferase_family_protein
Glyma.12G241100	15.65	NA	GroES-like_zinc-binding_alcohol_dehydrogenase_family_protein
Glyma.04G112800	6.92	PSAG	photosystem_I_subunit_G
Glyma.18G061500	3.47	NA	PHF5-like_protein
Glyma.12G181400	6.98	HD2C,HDT3	histone_deacetylase_2C
Glyma.05G247800	7.83	ATPAP3,PAP3	purple_acid_phosphatase_3
Glyma.07G160500	7.22	NA	Phosphofructokinase_family_protein
Glyma.07G012800	4.28	NA	Ribosomal_L28e_protein_family
Glyma.15G095300	6.92	NA	Ribosomal_protein_S11_family_protein
Glyma.06G310200	5.77	NA	Peptidase_S24/S26A/S26B/S26C_family_protein
Glyma.12G192200	10.84	NA	alpha/beta-Hydrolases_superfamily_protein
Glyma.15G111800	10.54	DECOY	decoy
Glyma.03G035600	3.47	ATLTP1,LP1,LTP1	lipid_transfer_protein_1
Glyma.02G097300	6.62	TIF3H1	translation_initiation_factor_3_subunit_H1
Glyma.04G257100	6.92	AGL11,STK	K-box_region_and_MADS-box_transcription_factor_family_protein_
Glyma.11G111400	6.62	FBA2	fructose-bisphosphate_aldolase_2
Glyma.09G093400	8.73	NA	NA
Glyma.16G182500	3.27	TPP2	tripeptidyl_peptidase_ii
Glyma.17G231000	2.71	NA	NA
Glyma.16G151800	8.09	NA	Dynein_light_chain_type_1_family_protein
Glyma.18G035500	5.42	NA	Protein_of_unknown_function_(DUF1644)
Glyma.08G092100	12.64	NA	Endomembrane_protein_70_protein_family
Glyma.02G165400	3.08	NA	P-loop_containing_nucleoside_triphosphate_hydrolases_superfamily_protein
Glyma.11G143200	8.73	NA	NA
Glyma.13G352100	12.34	NA	Ribosomal_L28e_protein_family
Glyma.09G223700	11.44	ATPS3,PS3	phosphate_starvation-induced_gene_3
Glyma.13G217600	9.03	NA	RNA-binding_protein
Glyma.01G234200	6.62	NA	NA
Glyma.02G237700	10.54	NA	Cytochrome_b-c1_complex,_subunit_8_protein
Glyma.15G106600	6.32	DER2.2	DERLIN-2.2
Glyma.06G185100	9.93	NA	NA
Glyma.04G179700	6.32	NA	NA
Glyma.08G115800	10.54	GF14_MU,GRF9	general_regulatory_factor_9
Glyma.09G061200	2.89	ACA8,AT-ACA8	autoinhibited_Ca2+_-ATPase,_isoform_8
Glyma.09G156600	5.72	NA	Ribosomal_protein_S3_family_protein
Glyma.05G213800	9.03	VHA-E3	vacuolar_H+-ATPase_subunit_E_isoform_3
Glyma.19G195100	6.92	SNRNP-G	probable_small_nuclear_ribonucleoprotein_G
Glyma.15G040200	9.33	HTA12	histone_H2A_12
Glyma.13G262400	2.71	NA	Carbohydrate-binding_X8_domain_superfamily_protein
Glyma.08G125400	9.03	NA	Protein_of_Unknown_Function_(DUF239)
Glyma.12G066300	3.27	NA	NA
Glyma.10G035300	5.42	NA	HR-like_lesion-inducing_protein-related
Glyma.13G057800	7.83	NA	Glycosyl_transferase,_family_35
Glyma.20G007400	11.14	NA	Phosphofructokinase_family_protein
Glyma.05G088100	5.72	ATFLS1,FLS,FLS1	flavonol_synthase_1
Glyma.07G078300	7.22	ATRSP41	RNA-binding_(RRM/RBD/RNP_motifs)_family_protein
Glyma.13G155200	3.27	ATTIL,TIL	temperature-induced_lipocalin
Glyma.08G159500	10.54	ATHEX3,HEXO2	beta-hexosaminidase_2
Glyma.05G113700	3.08	NA	NA
Glyma.12G031700	6.62	ADF5,ATADF5	actin_depolymerizing_factor_5
Glyma.20G110800	7.22	ATFD3,FD3	ferredoxin_3
Glyma.18G159800	7.22	NA	wound-responsive_protein-related
Glyma.14G014800	6.92	PBB2	20S_proteasome_beta_subunit_PBB2
Glyma.15G094800	7.83	NA	RNA-binding_protein
Glyma.20G108500	6.92	NA	NADH-ubiquinone_oxidoreductase_B18_subunit,_putative
Glyma.07G254600	7.22	NA	UDP-Glycosyltransferase_superfamily_protein
Glyma.17G100600	9.93	MDH	malate_dehydrogenase
Glyma.11G101500	9.95	ATNUC-L2,NUC-L2,PARLL1	nucleolin_like_2
Glyma.09G013700	3.08	NA	Heavy_metal_transport/detoxification_superfamily_protein_
Glyma.02G208900	8.13	ATCOX6B2,COX6B	cytochrome_C_oxidase_6B
Glyma.06G231500	3.67	mMDH1	Lactate/malate_dehydrogenase_family_protein
Glyma.08G142700	8.13	ATCPISCA,CPISCA	chloroplast-localized_ISCA-like_protein
Glyma.08G285900	5.55	NA	DC1_domain-containing_protein
Glyma.19G260800	8.73	NA	NA
Glyma.15G263400	10.24	NA	LEM3_(ligand-effect_modulator_3)_family_protein_/_CDC50_family_protein
Glyma.06G295100	7.22	NA	alpha/beta-Hydrolases_superfamily_protein
Glyma.19G143200	7.53	NA	A20/AN1-like_zinc_finger_family_protein
Glyma.06G062900	9.93	AtSDF2,ATSDL,SDF2	stromal_cell-derived_factor_2-like_protein_precursor
Glyma.20G167500	7.83	NA	NA
Glyma.08G246400	3.87	AFP3	ABI_five_binding_protein_3
Glyma.19G071800	3.47	AT-SO,AtSO,SOX	sulfite_oxidase
Glyma.01G030600	2.71	NA	Nucleic_acid-binding,_OB-fold-like_protein
Glyma.14G176900	7.22	14-3-3OMEGA,GF14_OMEGA,GRF2	general_regulatory_factor_2
Glyma.08G006400	2.71	AtTudor1,TSN1,Tudor1	TUDOR-SN_protein_1
Glyma.08G232600	8.83	NA	CTP_synthase_family_protein
Glyma.19G209700	8.43	NA	Amino_acid_dehydrogenase_family_protein
Glyma.13G045000	7.53	GLT1,PGLCT	plastidic_GLC_translocator
Glyma.13G237800	2.71	EMB3010,RPS6B	Ribosomal_protein_S6e
Glyma.15G040300	2.89	HTA12	histone_H2A_12
Glyma.09G170500	6.32	AtHB31,HB31	homeobox_protein_31
Glyma.19G121600	3.08	NA	NA
Glyma.09G126300	5.12	PKP-BETA1,PKP1,PKP2	plastidic_pyruvate_kinase_beta_subunit_1
Glyma.06G028200	9.03	ATPAP1,ATPAP12,PAP1,PAP12	purple_acid_phosphatase_12
Glyma.18G069900	9.03	NA	NA
Glyma.10G262400	10.54	ATCAD4,CAD,CAD-C,CAD4	GroES-like_zinc-binding_alcohol_dehydrogenase_family_protein
Glyma.09G240600	5.72	ATVDAC1,VDAC1	voltage_dependent_anion_channel_1
Glyma.04G066900	7.22	EBF1,FBL6	EIN3-binding_F_box_protein_1
Glyma.04G149200	6.02	HTA9	histone_H2A_protein_9
Glyma.06G064800	2.71	ATSK21,BIN2,DWF12,SK21,UCU1	Protein_kinase_superfamily_protein
Glyma.07G201300	6.32	APE2,TPT	Glucose-6-phosphate/phosphate_translocator-related
Glyma.20G111200	6.32	NA	clathrin_adaptor_complexes_medium_subunit_family_protein
Glyma.18G152400	4.69	NA	Bifunctional_inhibitor/lipid-transfer_protein/seed_storage_2S_albumin_superfamily_protein
Glyma.05G079000	5.55	PAG1	20S_proteasome_alpha_subunit_G1
Glyma.17G152700	7.83	NA	S-adenosyl-L-methionine-dependent_methyltransferases_superfamily_protein
Glyma.03G027500	7.22	NA	Transketolase
Glyma.20G015600	5.72	scpl50	serine_carboxypeptidase-like_50
Glyma.05G188800	6.62	ACT7	actin_7
Glyma.14G163200	8.73	NA	glycine-rich_protein
Glyma.04G015300	2.71	NA	Ribophorin_I
Glyma.08G324600	3.67	SVL1	SHV3-like_1
Glyma.03G110300	6.92	NA	Hyaluronan_/_mRNA_binding_family
Glyma.04G155900	3.47	scpl29	serine_carboxypeptidase-like_29
Glyma.10G033100	10.54	NA	winged-helix_DNA-binding_transcription_factor_family_protein
Glyma.06G063000	2.89	NA	ARM_repeat_superfamily_protein
Glyma.06G133500	3.67	EMB2024,PGL3	NagB/RpiA/CoA_transferase-like_superfamily_protein
Glyma.15G098500	6.32	ACP4	acyl_carrier_protein_4
Glyma.09G131800	3.27	ATQC,QC,QCT	glutaminyl_cyclase
Glyma.18G100500	7.22	ATR4,CYP83B1,RED1,RNT1,SUR2	cytochrome_P450,_family_83,_subfamily_B,_polypeptide_1
Glyma.13G202300	7.53	NF-YA9	nuclear_factor_Y,_subunit_A9
Glyma.06G132500	6.32	NA	Major_facilitator_superfamily_protein
Glyma.15G006400	5.72	NA	NADH-ubiquinone_oxidoreductase_24_kDa_subunit,_putative
Glyma.09G111400	7.53	NA	RNA-binding_(RRM/RBD/RNP_motifs)_family_protein
Glyma.06G171200	12.64	NA	N-terminal_nucleophile_aminohydrolases_(Ntn_hydrolases)_superfamily_protein
Glyma.19G154100	10.84	ATGPX4,GPX4	glutathione_peroxidase_4
Glyma.12G089200	3.71	ATFD3,FD3	ferredoxin_3
Glyma.11G111100	3.87	FBA2	fructose-bisphosphate_aldolase_2
Glyma.06G078500	4.28	PBA1	N-terminal_nucleophile_aminohydrolases_(Ntn_hydrolases)_superfamily_protein
Glyma.20G022200	8.13	ATVAMP726,VAMP726	vesicle-associated_membrane_protein_726
Glyma.18G291500	7.35	NA	O-Glycosyl_hydrolases_family_17_protein
Glyma.09G234700	5.63	ATVTI12,VTI12,VTI1B	Vesicle_transport_v-SNARE_family_protein
Glyma.20G126900	5.42	NA	Cyclase_family_protein
Glyma.04G063600	2.89	ATSK21,BIN2,DWF12,SK21,UCU1	Protein_kinase_superfamily_protein
Glyma.03G096400	10.84	NA	FRIGIDA-like_protein
Glyma.09G025700	8.43	PMP	putative_type_1_membrane_protein
Glyma.02G267000	3.47	NA	NA
Glyma.04G207800	6.32	AtFAAH,FAAH	fatty_acid_amide_hydrolase
Glyma.17G073800	6.32	NA	Cytosol_aminopeptidase_family_protein
Glyma.11G239400	7.22	NA	Lipase/lipooxygenase,_PLAT/LH2_family_protein
Glyma.03G258500	2.71	NA	NA
Glyma.12G020500	7.83	NA	NA
Glyma.10G128100	5.72	NA	GRIM-19_protein
Glyma.18G018600	5.12	ATIPS2,ATMIPS2,MIPS2	myo-inositol-1-phosphate_synthase_2
Glyma.12G169700	9.93	AtTMN1,TMN1	transmembrane_nine_1
Glyma.18G241900	7.53	NA	zinc_finger_(C2H2_type)_family_protein
Glyma.11G146800	6.92	ATPDI2,ATPDIL1-4,PDI2,PDIL1-4	PDI-like_1-4
Glyma.12G201900	8.13	ATRPS5B,RPS5B	ribosomal_protein_5B
Glyma.04G215800	6.44	PSAN	photosystem_I_reaction_center_subunit_PSI-N,_chloroplast,_putative_/_PSI-N,_putative_(PSAN)
Glyma.13G127400	11.14	NA	NAD(P)-binding_Rossmann-fold_superfamily_protein
Glyma.15G263500	8.13	ALDH5F1,SSADH,SSADH1	aldehyde_dehydrogenase_5F1
Glyma.01G030800	6.02	NA	Nucleic_acid-binding,_OB-fold-like_protein
Glyma.11G213800	6.02	NA	NA
Glyma.11G067800	6.62	SDH1-1	succinate_dehydrogenase_1-1
Glyma.04G229500	2.89	CID11	CTC-interacting_domain_11
Glyma.12G240700	6.92	emb2444	RNA-binding_(RRM/RBD/RNP_motifs)_family_protein
Glyma.14G126300	6.02	NA	Cytochrome_bd_ubiquinol_oxidase,_14kDa_subunit
Glyma.08G083700	6.92	NA	NA
Glyma.13G031200	6.62	PBC1	proteasome_beta_subunit_C1
Glyma.19G008700	3.08	NA	Oxidoreductase,_zinc-binding_dehydrogenase_family_protein
Glyma.05G008100	2.71	NA	FAD/NAD(P)-binding_oxidoreductase
Glyma.13G241300	3.87	NA	Clathrin_light_chain_protein
Glyma.12G188200	5.42	ATHDA8,HDA08,HDA8	histone_deacetylase_8
Glyma.17G132500	7.22	NRS/ER,UER1	nucleotide-rhamnose_synthase/epimerase-reductase
Glyma.02G101700	5.72	DCP5	decapping_5
Glyma.03G046400	6.02	PRA1.B4	prenylated_RAB_acceptor_1.B4
Glyma.16G143600	7.53	OEC33,PSBO-2,PSBO2	photosystem_II_subunit_O-2
Glyma.12G215500	2.71	HTA10	histone_H2A_10
Glyma.05G186600	7.22	EMB2107,MSA,RPN5A	26S_proteasome_regulatory_subunit,_putative_(RPN5)
Glyma.02G236700	3.08	EIF2_BETA,EMB1401	eukaryotic_translation_initiation_factor_2_beta_subunit
Glyma.15G100300	8.13	NA	NA
Glyma.06G144100	13.25	NA	Melibiase_family_protein
Glyma.08G056400	7.81	ATACP5,ATPAP17,PAP17	purple_acid_phosphatase_17
Glyma.15G003600	5.42	ATCCR1,CCR1,IRX4	cinnamoyl_coa_reductase_1
Glyma.06G184800	10.24	NA	Xanthine/uracil_permease_family_protein
Glyma.08G345100	2.71	EPFL9,STOMAGEN	stomagen
Glyma.14G127600	7.53	NA	ATPase,_F0/V0_complex,_subunit_C_protein
Glyma.15G259200	15.05	ATRUB1,NEDD8,RUB1	related_to_ubiquitin_1
Glyma.08G084300	12.64	KAS_I,KAS1	3-ketoacyl-acyl_carrier_protein_synthase_I
Glyma.05G045900	2.9	MLS	malate_synthase
Glyma.10G184900	3.08	ATAAH-2,UAH	ureidoglycolate_amidohydrolase
Glyma.05G145700	7.22	NA	Remorin_family_protein
Glyma.08G016600	3.67	NA	PLAC8_family_protein
Glyma.19G197200	6.44	ABA2,ATABA2,ATSDR1,GIN1,ISI4,SDR1,SIS4,SRE1	NAD(P)-binding_Rossmann-fold_superfamily_protein
Glyma.12G065500	7.22	NA	NA
Glyma.02G077800	3.27	NA	NA
Glyma.19G176700	3.47	NA	NA
Glyma.14G194500	2.71	NA	Selenoprotein,_Rdx_type
Glyma.07G046200	8.43	UBC34	ubiquitin-conjugating_enzyme_34
Glyma.08G330400	13.25	NOI	RPM1-interacting_protein_4_(RIN4)_family_protein
Glyma.15G199800	6.32	NA	NA
Glyma.17G148400	6.62	UGLYAH	ureidoglycine_aminohydrolase
Glyma.18G245500	5.33	NA	NA
Glyma.09G215400	2.89	NA	Ankyrin_repeat_family_protein
Glyma.20G117100	9.44	OVA9	glutamine-tRNA_ligase,_putative_/_glutaminyl-tRNA_synthetase,_putative_/_GlnRS,_putative
Glyma.20G150700	6.02	NA	emp24/gp25L/p24_family/GOLD_family_protein
Glyma.17G149500	3.35	CKB4	casein_kinase_II__beta_subunit_4
Glyma.03G128800	6.92	NA	SEC14_cytosolic_factor_family_protein_/_phosphoglyceride_transfer_family_protein
Glyma.13G065000	6.02	ATHIR1,HIR1	SPFH/Band_7/PHB_domain-containing_membrane-associated_protein_family
Glyma.20G216100	11.14	ALPHA-TIP,TIP3;1	Aquaporin-like_superfamily_protein
Glyma.09G043100	3.08	NA	Dynein_light_chain_type_1_family_protein
Glyma.17G183500	6.02	NA	NA
Glyma.04G196900	4.07	NA	NA
Glyma.09G210000	6.92	NA	Proteasome_component_(PCI)_domain_protein
Glyma.08G150200	7.22	NA	ankyrin_repeat_family_protein
Glyma.15G031100	18.06	ARI7,ATARI7	IBR_domain-containing_protein
Glyma.11G090900	4.36	ATRLI2,RLI2	RNAse_l_inhibitor_protein_2
Glyma.09G015400	6.32	D6PKL2,PK5	D6_protein_kinase_like_2
Glyma.04G025000	6.32	AtGH9B7,GH9B7	glycosyl_hydrolase_9B7
Glyma.02G174400	6.92	NA	NA
Glyma.08G048800	6.62	NA	26S_proteasome_regulatory_complex,_non-ATPase_subcomplex,_Rpn2/Psmd1_subunit
Glyma.12G165300	9.63	ATFP8,ATRABD1,RABD1	Ras-related_small_GTP-binding_family_protein
Glyma.05G020900	6.92	GR-RBP3	glycine-rich_RNA-binding_protein_3
Glyma.18G092900	5.12	VTC2	mannose-1-phosphate_guanylyltransferase_(GDP)s;GDP-galactose:mannose-1-phosphate_guanylyltransferases;GDP-galactose:glucose-1-phosphate_guanylyltransferases;GDP-galactose:myoinositol-1-phosphate_guanylyltransferases;glucose-1-phosphate_guanylyltransferase
Glyma.07G268100	10.54	L1L,NF-YB6	nuclear_factor_Y,_subunit_B6
Glyma.05G059200	7.53	EMB2769	Cwf15_/_Cwc15_cell_cycle_control_family_protein
Glyma.19G126900	11.74	NA	Single-stranded_nucleic_acid_binding_R3H_protein
Glyma.07G049400	6.15	APRR5,PRR5	pseudo-response_regulator_5
Glyma.12G228400	5.42	NA	cobalt_ion_binding
Glyma.07G049600	4.07	PDH-E1_ALPHA	pyruvate_dehydrogenase_E1_alpha
Glyma.17G128100	15.65	MLS	malate_synthase
Glyma.15G019300	9.33	ATNADP-ME4,NADP-ME4	NADP-malic_enzyme_4
Glyma.04G030500	7.22	OTC	ornithine_carbamoyltransferase
Glyma.11G211500	6.32	NA	NA
Glyma.17G009100	2.89	SOBER1	carboxylesterases
Glyma.18G267200	5.82	AFP3	ABI_five_binding_protein_3
Glyma.20G130400	3.35	FUC95A	1,2-alpha-L-fucosidases
Glyma.08G018100	8.29	NA	D111/G-patch_domain-containing_protein
Glyma.05G026300	7.22	MDH	malate_dehydrogenase
Glyma.06G135300	8.73	CID11	CTC-interacting_domain_11
Glyma.19G197500	3.47	MMZ3,UEV1C	MMS_ZWEI_homologue_3
Glyma.17G106000	9.93	NA	Ubiquitin-like_superfamily_protein
Glyma.01G105500	6.02	PAB1	proteasome_subunit_PAB1
Glyma.04G023900	6.92	TUB1	tubulin_beta-1_chain
Glyma.07G260200	11.14	CPK21	calcium-dependent_protein_kinase_21
Glyma.10G151000	7.22	NA	Dormancy/auxin_associated_family_protein
Glyma.17G239000	8.73	RD21,RD21A	Granulin_repeat_cysteine_protease_family_protein
Glyma.01G026700	10.54	AOAT2,GGT2	alanine-2-oxoglutarate_aminotransferase_2
Glyma.02G205600	6.02	Hsp70b	heat_shock_protein_70B
Glyma.17G261700	6.62	CAT2	catalase_2
Glyma.06G265700	3.27	NA	NAD(P)-binding_Rossmann-fold_superfamily_protein
Glyma.06G081900	7.22	ATSPP,SPP	signal_peptide_peptidase
Glyma.02G247900	9.33	NA	Calcium-dependent_lipid-binding_(CaLB_domain)_family_protein
Glyma.16G107300	5.67	NA	Pectinacetylesterase_family_protein
Glyma.10G261800	3.08	ATTIC21,CIA5,PIC1,TIC21	translocon_at_inner_membrane_of_chloroplasts_21
Glyma.06G082500	8.73	NA	RNA_polymerase_I-associated_factor_PAF67
Glyma.01G115000	6.32	NA	Carbohydrate-binding-like_fold
Glyma.06G220500	6.92	NA	signal_recognition_particle_receptor_alpha_subunit_family_protein
Glyma.16G043100	7.53	NA	hydroxyproline-rich_glycoprotein_family_protein
Glyma.01G020900	3.27	ATCAD7,CAD7,ELI3,ELI3-1	elicitor-activated_gene_3-1
Glyma.07G070900	5.55	NA	NA
Glyma.19G002400	8.73	NA	Class_I_glutamine_amidotransferase-like_superfamily_protein
Glyma.11G134200	6.62	NA	HSP20-like_chaperones_superfamily_protein
Glyma.16G112800	9.93	NA	RNA_polymerase_I_specific_transcription_initiation_factor_RRN3_protein
Glyma.02G296700	14.75	NA	Mitochondrial_import_inner_membrane_translocase_subunit_Tim17/Tim22/Tim23_family_protein
Glyma.06G255200	8.43	NA	Adenine_nucleotide_alpha_hydrolases-like_superfamily_protein
Glyma.15G026100	10.24	EIF4A-2	eif4a-2
Glyma.10G297600	2.71	NA	Bifunctional_inhibitor/lipid-transfer_protein/seed_storage_2S_albumin_superfamily_protein
Glyma.11G145400	10.54	GATA11	GATA_transcription_factor_11
Glyma.05G172300	6.98	PSBY,YCF32	photosystem_II_BY
Glyma.07G134200	6.02	NA	Protein_of_unknown_function_(PD694200)
Glyma.17G061300	7.22	NA	Galactose_mutarotase-like_superfamily_protein
Glyma.20G063200	6.62	NA	Clathrin_adaptor_complex_small_chain_family_protein
Glyma.09G030300	15.05	HSR8,MUR4,UXE1	NAD(P)-binding_Rossmann-fold_superfamily_protein
Glyma.16G126200	2.89	PAD2	proteasome_alpha_subunit_D2
Glyma.15G143700	4.69	ATBXL1,BXL1	beta-xylosidase_1
Glyma.05G030000	7.83	ATHB-1,ATHB1,HAT5,HB-1,HD-ZIP-1	homeobox_1
Glyma.03G175600	6.62	RSZ32	RNA-binding_(RRM/RBD/RNP_motifs)_family_protein_with_retrovirus_zinc_finger-like_domain
Glyma.06G214900	6.92	HTA9	histone_H2A_protein_9
Glyma.05G106100	12.64	FRO1	NADH-ubiquinone_oxidoreductase-related
Glyma.14G068500	6.62	SCL30	SC35-like_splicing_factor_30
Glyma.07G183600	8.43	ALDH6B2	aldehyde_dehydrogenase__6B2
Glyma.12G228600	7.22	NA	Class_I_glutamine_amidotransferase-like_superfamily_protein
Glyma.17G047000	6.02	ATKAS2,FAB1,KAS2	fatty_acid_biosynthesis_1
Glyma.02G202700	6.62	NA	Cytochrome_c_oxidase,_subunit_Vib_family_protein
Glyma.11G043300	8.13	NA	Peptidase_M20/M25/M40_family_protein
Glyma.02G016000	3.47	NA	Ribosomal_protein_L19e_family_protein
Glyma.18G220700	9.93	NA	Transducin/WD40_repeat-like_superfamily_protein
Glyma.08G008100	6.32	ARF1-BP,ARF2,HSS,ORE14	auxin_response_factor_2
Glyma.10G096200	24.38	UBC10	ubiquitin-conjugating_enzyme_10
Glyma.05G041600	2.89	NA	ubiquitin-associated_(UBA)/TS-N_domain-containing_protein_/_octicosapeptide/Phox/Bemp1_(PB1)_domain-containing_protein
Glyma.07G175000	5.72	ASB1,TRP4,WEI7	anthranilate_synthase_beta_subunit_1
Glyma.03G175400	5.72	RSZ32	RNA-binding_(RRM/RBD/RNP_motifs)_family_protein_with_retrovirus_zinc_finger-like_domain
Glyma.07G001500	8.43	AtVHP2;2,VHP2;2	Inorganic_H_pyrophosphatase_family_protein
Glyma.04G142300	5.12	NA	Acyl-CoA_N-acyltransferases_(NAT)_superfamily_protein
Glyma.05G175600	5.42	ATHB-16,ATHB16,HB16	homeobox_protein_16
Glyma.05G140600	5.42	NA	NA
Glyma.03G238100	6.62	NA	glycoside_hydrolase_family_2_protein
Glyma.09G245700	6.62	NA	ATPase,_V1_complex,_subunit_B_protein
Glyma.10G241000	9.03	ATPGMP,PGM,PGM1,STF1	phosphoglucomutase
Glyma.04G248300	10.24	TAPX	thylakoidal_ascorbate_peroxidase
Glyma.15G116500	3.67	NA	NA
Glyma.13G261500	3.08	NA	Ribosomal_protein_L18ae_family
Glyma.19G020000	3.08	ATHIR1,HIR1	SPFH/Band_7/PHB_domain-containing_membrane-associated_protein_family
Glyma.11G039100	8.43	CKB1	casein_kinase_II__beta_chain_1
Glyma.13G112100	7.83	UBP1B	oligouridylate_binding_protein_1B
Glyma.07G155700	6.02	PAC1	20S_proteasome_alpha_subunit_C1
Glyma.08G154900	7.53	AAC2	ADP/ATP_carrier_2
Glyma.16G213300	3.87	STT3B	staurosporin_and_temperature_sensitive_3-like_b
Glyma.17G074200	10.54	UBP23	ubiquitin-specific_protease_23
Glyma.09G068400	6.92	ATHAP2C,HAP2C,NF-YA3	nuclear_factor_Y,_subunit_A3
Glyma.06G289400	6.02	ATRPN1A,RPN1A	26S_proteasome_regulatory_subunit_S2_1A
Glyma.12G044100	16.74	ATRAB7B,ATRABG3F,RAB71,RAB7B,RABG3F	RAB_GTPase_homolog_G3F
Glyma.08G082000	8.43	RPN12a	regulatory_particle_non-ATPase_12A
Glyma.06G100600	5.72	ATISA3,ISA3	isoamylase_3
Glyma.14G176600	4.28	NA	Class-II_DAHP_synthetase_family_protein
Glyma.02G269400	9.93	AtGH9B8,GH9B8	glycosyl_hydrolase_9B8
Glyma.08G224200	3.67	7RED,DWF5,LE,PA,ST7R	Ergosterol_biosynthesis_ERG4/ERG24_family
Glyma.06G270200	5.42	ATPDI7,ATPDIL5-4,PDI7,PDIL5-4	PDI-like_5-4
Glyma.19G125200	12.34	NA	Peroxisomal_membrane_22_kDa_(Mpv17/PMP22)_family_protein
Glyma.14G093100	6.02	ATMT-1,ATMT-K,MT2A	metallothionein_2A
Glyma.20G221000	5.72	SEC	Tetratricopeptide_repeat_(TPR)-like_superfamily_protein
Glyma.02G034800	9.33	NA	Nucleic_acid-binding,_OB-fold-like_protein
Glyma.06G306400	5.72	NA	NA
Glyma.07G053600	5.77	NA	ORMDL_family_protein
Glyma.03G056400	6.33	ACX4,ATG6,ATSCX	acyl-CoA_oxidase_4
Glyma.15G215600	2.89	NA	Leucine-rich_repeat_protein_kinase_family_protein
Glyma.18G091500	6.92	NA	NAD(P)-binding_Rossmann-fold_superfamily_protein
Glyma.08G254500	6.92	NA	6-phosphogluconate_dehydrogenase_family_protein
Glyma.03G159100	11.14	PSBW	photosystem_II_reaction_center_W
Glyma.03G244800	3.67	ATCYS-3A,CYTACS1,OASA1,OLD3	O-acetylserine_(thiol)_lyase_(OAS-TL)_isoform_A1
Glyma.05G180700	7.83	NA	NA
Glyma.20G173300	7.22	NA	Trm112p-like_protein
Glyma.07G002000	3.87	NA	Protein_of_unknown_function_(DUF1666)
Glyma.03G142500	6.62	NA	Calcium-dependent_lipid-binding_(CaLB_domain)_plant_phosphoribosyltransferase_family_protein
Glyma.18G228100	5.42	ATUTR2,UTR2	UDP-galactose_transporter_2
Glyma.05G148800	6.92	AGL9,SEP3	K-box_region_and_MADS-box_transcription_factor_family_protein_
Glyma.11G112000	3.27	ERG9,SQS1	squalene_synthase_1
Glyma.07G084000	16.56	ATRPABC24.3,NRPB5,NRPD5,RPB5A	Eukaryotic_rpb5_RNA_polymerase_subunit_family_protein
Glyma.09G234800	7.22	ATPME31,PME31	pectin_methylesterase_31
Glyma.04G057000	7.83	COPT5	copper_transporter_5
Glyma.19G126800	7.22	BZIP17	Basic-leucine_zipper_(bZIP)_transcription_factor_family_protein
Glyma.11G122300	6.02	TOM6	translocase_of_the_outer_mitochondrial_membrane_6
Glyma.01G245700	6.62	NA	DNAJ_heat_shock_N-terminal_domain-containing_protein
Glyma.16G155800	6.21	ATHPA1,EMB2196,HISN6A,HPA1	histidinol_phosphate_aminotransferase_1
Glyma.14G103800	5.42	NA	NA
Glyma.08G168200	8.73	ATRUB1,NEDD8,RUB1	related_to_ubiquitin_1
Glyma.20G180300	6.92	NA	Ribophorin_I
Glyma.16G155500	3.68	NA	Uncharacterised_protein_family_(UPF0497)
Glyma.16G155700	3.08	ATGR1,GR1	glutathione-disulfide_reductase
Glyma.20G110400	9.33	NA	ACT_domain-containing_protein
Glyma.12G166100	6.02	ATSK41,SK41	shaggy-like_protein_kinase_41
Glyma.13G004600	3.65	NA	Clathrin_adaptor_complex_small_chain_family_protein
Glyma.02G205500	6.02	eIFiso4G1	MIF4G_domain-containing_protein_/_MA3_domain-containing_protein
Glyma.18G219900	7.22	NA	Protein_kinase_superfamily_protein
Glyma.01G003700	54.44	NA	NA
Glyma.19G168300	8.43	NA	Tetratricopeptide_repeat_(TPR)-like_superfamily_protein
Glyma.01G032500	6.02	NA	Threonyl-tRNA_synthetase
Glyma.13G308100	7.53	ATRBX1,HRT1,RBX1,ROC1	RING-box_1
Glyma.14G112600	6.02	NA	NA
Glyma.14G039000	7.22	RHC1A	RING-H2_finger_C1A
Glyma.16G046900	8.43	AT-IE,HISN2	histidine_biosynthesis_bifunctional_protein_(HISIE)
Glyma.18G096400	7.83	NA	Translation_initiation_factor_SUI1_family_protein
Glyma.13G131300	3.19	AGD7,ASP1	ARF-GAP_domain_7
Glyma.08G025100	6.92	NA	Nodulin_MtN3_family_protein
Glyma.11G118600	5.72	NA	coatomer_gamma-2_subunit,_putative_/_gamma-2_coat_protein,_putative_/_gamma-2_COP,_putative
Glyma.10G025400	2.71	NA	NA
Glyma.11G216200	6.62	ALY4	ALWAYS_EARLY_4
Glyma.11G240200	4.48	ASN3	asparagine_synthetase_3
Glyma.12G005300	2.71	ATBAG7,BAG7	BCL-2-associated_athanogene_7
Glyma.04G080200	8.43	ATSPP,SPP	signal_peptide_peptidase
Glyma.17G141500	7.53	EMB2769	Cwf15_/_Cwc15_cell_cycle_control_family_protein
Glyma.02G293500	6.92	PYRB	PYRIMIDINE_B
Glyma.08G213300	6.62	NA	Ubiquitin_system_component_Cue_protein
Glyma.14G142100	2.89	ATSPP,SPP	signal_peptide_peptidase
Glyma.13G194300	2.71	NA	NA
Glyma.17G252100	6.02	ARS5,ATPSM30,PAF1	proteasome_alpha_subunit_F1
Glyma.17G009400	7.53	IBR1,SDRA	indole-3-butyric_acid_response_1
Glyma.09G105000	6.62	PP2A-4	protein_phosphatase_2A-4
Glyma.08G188400	5.72	AtTMN1,TMN1	transmembrane_nine_1
Glyma.04G234900	36.46	TAP46	2A_phosphatase_associated_protein_of_46_kD
Glyma.10G199300	6.32	NA	Coatomer,_alpha_subunit
Glyma.20G103200	3.87	ASA2,ATHANSYNAB	anthranilate_synthase_2
Glyma.10G153900	4.48	ATLOX1,LOX1	lipoxygenase_1
Glyma.07G085200	3.08	AIM1	Enoyl-CoA_hydratase/isomerase_family
Glyma.13G209400	6.32	NA	Serinc-domain_containing_serine_and_sphingolipid_biosynthesis_protein
Glyma.16G015500	8.13	RPT1A	regulatory_particle_triple-A_1A
Glyma.14G079100	26.79	NA	AP2/B3-like_transcriptional_factor_family_protein
Glyma.05G156300	11.44	ACD1-LIKE,PTC52,TIC55-IV	ACD1-like
Glyma.06G293700	6.02	NA	Tetraspanin_family_protein
Glyma.04G221600	6.62	ATKT2,ATKUP2,KT2,KUP2,SHY3,TRK2	potassium_transporter_2
Glyma.10G276300	6.92	NA	Uncharacterized_protein_family_(UPF0016)
Glyma.08G336000	9.33	NA	translocation_protein-related
Glyma.07G031600	7.22	NA	Alba_DNA/RNA-binding_protein
Glyma.06G182600	10.24	ATPEX14,PED2,PEX14	peroxin_14
Glyma.08G209100	6.02	ATNTT1,NTT1	nucleotide_transporter_1
Glyma.10G071500	3.47	NA	alpha/beta-Hydrolases_superfamily_protein
Glyma.11G120900	10.54	CLB6,HDR,ISPH	4-hydroxy-3-methylbut-2-enyl_diphosphate_reductase
Glyma.16G095700	8.73	NA	Calcium-binding_EF-hand_family_protein
Glyma.12G103900	8.13	NA	Outer_arm_dynein_light_chain_1_protein
Glyma.01G225200	6.32	LACS4	AMP-dependent_synthetase_and_ligase_family_protein
Glyma.03G014300	6.62	NA	NAD(P)-binding_Rossmann-fold_superfamily_protein
Glyma.16G175400	6.92	UGT88A1	UDP-glucosyl_transferase_88A1
Glyma.16G165000	11.14	PTB3	polypyrimidine_tract-binding_protein_3
Glyma.20G025500	8.43	NA	Nuclear_transport_factor_2_(NTF2)_family_protein_with_RNA_binding_(RRM-RBD-RNP_motifs)_domain
Glyma.17G164800	6.62	AGP18,ATAGP18	arabinogalactan_protein__18
Glyma.03G006900	6.02	ATCBR,CBR,CBR1	NADH:cytochrome_B5_reductase_1
Glyma.10G204800	9.93	NA	NAD(P)-binding_Rossmann-fold_superfamily_protein
Glyma.15G150000	10.54	NA	Dynein_light_chain_type_1_family_protein
Glyma.10G086600	6.92	NA	Sucrose-6F-phosphate_phosphohydrolase_family_protein
Glyma.02G216100	8.73	NA	transcription_initiation_factor_IIA_gamma_chain_/_TFIIA-gamma_(TFIIA-S)
Glyma.01G145000	5.72	NA	Cox19-like_CHCH_family_protein
Glyma.18G215000	4.01	NA	NA
Glyma.20G244100	9.33	NA	peptidase_M1_family_protein
Glyma.12G037000	9.63	ATPLT5,ATPMT5,PMT5	polyol/monosaccharide_transporter_5
Glyma.U017400	6.32	BGLU42	beta_glucosidase_42
Glyma.05G001900	9.93	MAP2B	methionine_aminopeptidase_2B
Glyma.08G218500	8.13	NA	vacuolar_ATP_synthase_subunit_D_(VATD)_/_V-ATPase_D_subunit_/_vacuolar_proton_pump_D_subunit_(VATPD)
Glyma.08G322900	15.05	NA	ATPase,_V0_complex,_subunit_E
Glyma.04G067900	6.32	AtCESA1,CESA1,RSW1	cellulose_synthase_1
Glyma.12G030200	7.22	NA	glycine-rich_protein
Glyma.02G106300	6.32	NA	Fatty_acid/sphingolipid_desaturase
Glyma.08G157600	16.26	NA	NA
Glyma.01G089900	5.12	DCP5	decapping_5
Glyma.17G012300	7.83	sks4	SKU5__similar_4
Glyma.10G014300	3.47	PAE2	20S_proteasome_alpha_subunit_E2
Glyma.13G299300	3.08	NA	Protein_phosphatase_2C_family_protein
Glyma.18G055300	9.93	NA	Peroxidase_superfamily_protein
Glyma.08G211900	8.43	NA	NA
Glyma.02G165000	2.71	NA	Pyruvate_kinase_family_protein
Glyma.05G168500	4.98	AtTMN1,TMN1	transmembrane_nine_1
Glyma.04G199200	7.53	UBC27	ubiquitin-conjugating_enzyme_27
Glyma.18G019700	7.83	NA	SAP_domain-containing_protein
Glyma.10G109000	8.43	NA	Acyl-CoA_N-acyltransferases_(NAT)_superfamily_protein
Glyma.18G133400	6.32	ATEIF3G1,EIF3G1	eukaryotic_translation_initiation_factor_3G1
Glyma.14G182100	8.73	AR1,ATR1	P450_reductase_1
Glyma.06G030600	6.92	OTC	ornithine_carbamoyltransferase
Glyma.11G102100	6.92	ACD,ALATS	Alanyl-tRNA_synthetase
Glyma.09G137200	5.12	TPP2	tripeptidyl_peptidase_ii
Glyma.19G249000	7.22	ROC2	rotamase_cyclophilin_2
Glyma.01G148500	17.46	NA	Mob1/phocein_family_protein
Glyma.05G208200	6.32	NA	NA
Glyma.03G154800	21.47	NA	Acyl-CoA_N-acyltransferases_(NAT)_superfamily_protein
Glyma.05G165500	8.13	ATTCP-1,TCP-1	T-complex_protein_1_alpha_subunit
Glyma.02G013600	9.03	PAE2	20S_proteasome_alpha_subunit_E2
Glyma.03G214400	3.87	ATSRP34,SR1,SRP34	RNA-binding_(RRM/RBD/RNP_motifs)_family_protein
Glyma.06G191200	7.83	IQD31	IQ-domain_31
Glyma.16G022300	3.27	ATRSP31,RSP31	RNA-binding_(RRM/RBD/RNP_motifs)_family_protein
Glyma.14G118200	11.44	SKP2A	F-box/RNI-like_superfamily_protein
Glyma.15G112000	7.53	PUX4	plant_UBX_domain_containing_protein_4
Glyma.05G241500	6.92	NA	26S_proteasome_regulatory_complex,_non-ATPase_subcomplex,_Rpn2/Psmd1_subunit
Glyma.08G063400	4.07	NA	CBS_domain-containing_protein_with_a_domain_of_unknown_function_(DUF21)
Glyma.07G272800	9.33	ARF1	auxin_response_factor_1
Glyma.16G049300	7.83	AK,AK-LYS1,AK1	aspartate_kinase_1
Glyma.18G193900	8.43	NA	Concanavalin_A-like_lectin_family_protein
Glyma.15G169800	8.73	ACG1,ATMSI4,FVE,MSI4,NFC04,NFC4	Transducin_family_protein_/_WD-40_repeat_family_protein
Glyma.09G197100	6.02	ATGLR3.6,GLR3.6	glutamate_receptor_3.6
Glyma.16G037700	6.62	NA	Transducin/WD40_repeat-like_superfamily_protein
Glyma.11G138800	9.93	ORP3C	OSBP(oxysterol_binding_protein)-related_protein_3C
Glyma.09G033400	7.83	NA	Rab5-interacting_family_protein
Glyma.02G258200	5.72	NA	Clathrin,_heavy_chain
Glyma.13G197100	8.13	PFD1	PREFOLDIN_1
Glyma.17G114700	16.26	ATSPX2,SPX2	SPX_domain_gene_2
Glyma.08G153200	5.72	NA	A20/AN1-like_zinc_finger_family_protein
Glyma.09G237300	6.02	AAR3	Domain_of_unknown_function_(DUF298)
Glyma.06G050700	8.13	GAMMA-VPE,GAMMAVPE	gamma_vacuolar_processing_enzyme
Glyma.12G074500	6.92	NA	Histone_superfamily_protein
Glyma.12G067700	9.63	ATPDI2,ATPDIL1-4,PDI2,PDIL1-4	PDI-like_1-4
Glyma.19G088000	8.13	NA	P-loop_containing_nucleoside_triphosphate_hydrolases_superfamily_protein
Glyma.03G050300	6.21	NA	Ribosomal_protein_S4_(RPS4A)_family_protein
Glyma.15G099100	7.53	NA	RING/U-box_superfamily_protein
Glyma.03G218700	2.71	ATBXL2,BXL2	beta-xylosidase_2
Glyma.13G130700	6.92	SLT1	HSP20-like_chaperones_superfamily_protein
Glyma.04G154100	6.02	eIFiso4G1	MIF4G_domain-containing_protein_/_MA3_domain-containing_protein
Glyma.12G099000	3.47	SDH3-2	succinate_dehydrogenase_3-2
Glyma.20G112800	2.89	KTF1,SPT5L	kow_domain-containing_transcription_factor_1
Glyma.15G273000	6.62	NA	zinc_finger_(CCCH-type/C3HC4-type_RING_finger)_family_protein
Glyma.01G080700	6.66	NA	NAD(P)-binding_Rossmann-fold_superfamily_protein
Glyma.02G044500	10.44	GLP4	germin-like_protein_4
Glyma.05G055100	8.73	NA	Bifunctional_inhibitor/lipid-transfer_protein/seed_storage_2S_albumin_superfamily_protein
Glyma.02G262100	8.73	TBL33	TRICHOME_BIREFRINGENCE-LIKE_33
Glyma.15G084400	8.43	ATSK21,BIN2,DWF12,SK21,UCU1	Protein_kinase_superfamily_protein
Glyma.12G096200	10.54	NA	ATPase,_F0_complex,_subunit_A_protein
Glyma.16G005200	6.02	NA	Mitochondrial_substrate_carrier_family_protein
Glyma.07G185800	9.03	NA	CBS_domain-containing_protein_with_a_domain_of_unknown_function_(DUF21)
Glyma.06G070300	7.22	NA	Cyclophilin-like_peptidyl-prolyl_cis-trans_isomerase_family_protein
Glyma.12G040200	3.87	NA	NOP56-like_pre_RNA_processing_ribonucleoprotein
Glyma.04G253700	10.54	NA	NA
Glyma.06G172000	3.08	NA	Zn-dependent_exopeptidases_superfamily_protein
Glyma.05G132100	6.02	GlcNAc1pUT1	N-acetylglucosamine-1-phosphate_uridylyltransferase_1
Glyma.14G044100	6.02	NA	Ribosomal_protein_S10p/S20e_family_protein
Glyma.17G109500	4.9	ATSYTE,NTMC2T2.1,NTMC2TYPE2.1,SYT5,SYTE	Calcium-dependent_lipid-binding_(CaLB_domain)_family_protein
Glyma.06G083700	5.72	NA	catalytics
Glyma.06G128000	6.62	BOB1	HSP20-like_chaperones_superfamily_protein
Glyma.07G180100	7.83	KAT2,PED1,PKT3	peroxisomal_3-ketoacyl-CoA_thiolase_3
Glyma.05G172800	8.43	NA	NA
Glyma.01G238600	8.33	HSP70T-2	heat-shock_protein_70T-2
Glyma.13G064900	9.63	ATVDAC1,VDAC1	voltage_dependent_anion_channel_1
Glyma.03G176200	7.53	NA	NA
Glyma.08G152600	2.71	NA	SWAP_(Suppressor-of-White-APricot)/surp_domain-containing_protein_/_D111/G-patch_domain-containing_protein
Glyma.20G245400	6.92	NA	TMPIT-like_protein
Glyma.14G131300	6.62	NA	O-Glycosyl_hydrolases_family_17_protein
Glyma.07G004100	7.22	NA	Coatomer,_beta_subunit
Glyma.12G159600	8.43	NA	RNA-binding_(RRM/RBD/RNP_motifs)_family_protein
Glyma.01G058000	37.84	GF14_IOTA,GRF12	general_regulatory_factor_12
Glyma.03G115300	10.24	CYP51,CYP51A2,CYP51G1,EMB1738	CYTOCHROME_P450_51G1
Glyma.10G091000	3.47	CYL1,NAGLU	alpha-N-acetylglucosaminidase_family_/_NAGLU_family
Glyma.18G078700	6.02	NA	Ribosomal_protein_L19_family_protein
Glyma.08G025600	2.71	NA	ARM_repeat_superfamily_protein
Glyma.15G272300	7.83	NA	A20/AN1-like_zinc_finger_family_protein
Glyma.13G230600	6.21	NA	Ribosomal_protein_L34
Glyma.03G218300	2.89	ATERDJ3B,ERDJ3B	DNAJ_heat_shock_family_protein
Glyma.02G090800	6.02	NA	Translation_initiation_factor_IF2/IF5
Glyma.01G124900	8.43	PAC1	20S_proteasome_alpha_subunit_C1
Glyma.01G159800	5.42	PSAT	phosphoserine_aminotransferase
Glyma.11G244600	6.62	ORP1D	OSBP(oxysterol_binding_protein)-related_protein_1D
Glyma.10G179700	6.62	NA	Protein_of_unknown_function_(DUF1012)
Glyma.07G046800	5.42	SRF6	STRUBBELIG-receptor_family_6
Glyma.11G210700	6.32	ATKRS-1	lysyl-tRNA_synthetase_1
Glyma.18G213400	6.32	ATELP,ATELP1,ATVSR1,BP-80,BP80,BP80-1;1,BP80B,GFS1,VSR1,VSR1;1	vacuolar_sorting_receptor_homolog_1
Glyma.14G098900	8.52	SLOMO	F-box_family_protein
Glyma.09G218500	46.06	NA	Adaptin_family_protein
Glyma.12G026700	9.03	PPAN	PETER_PAN-like_protein
Glyma.08G145600	6.32	CESA6,E112,IXR2,PRC1	cellulose_synthase_6
Glyma.08G064100	7.22	NA	NAD(P)-linked_oxidoreductase_superfamily_protein
Glyma.10G104300	8.73	CPY,SCPL49	SERINE_CARBOXYPEPTIDASE-LIKE_49
Glyma.05G165300	12.04	NA	Kinase-related_protein_of_unknown_function_(DUF1296)
Glyma.11G011300	6.02	NA	RING/U-box_superfamily_protein
Glyma.09G098800	6.32	NA	Protein_of_unknown_function_(DUF1068)
Glyma.04G030800	4.69	GAMMA_CA1	gamma_carbonic_anhydrase_1
Glyma.06G225800	3.36	NA	Uncharacterised_BCR,_YbaB_family_COG0718
Glyma.13G167800	7.83	NA	Ribosomal_protein_L7Ae/L30e/S12e/Gadd45_family_protein
Glyma.08G232000	5.55	ATPHB3,PHB3	prohibitin_3
Glyma.20G048700	29.29	NA	plastid-encoded_CLP_P
Glyma.12G026000	7.53	NA	Metal-dependent_phosphohydrolase
Glyma.19G190100	6.02	NA	Pyruvate_kinase_family_protein
Glyma.17G083700	3.08	NA	tRNA_synthetase_beta_subunit_family_protein
Glyma.20G209900	7.83	AT-PHH1,ATCRY2,CRY2,FHA,PHH1	cryptochrome_2
Glyma.06G081600	6.02	NA	adaptin_family_protein
Glyma.02G144700	6.92	NA	Bax_inhibitor-1_family_protein
Glyma.17G150200	11.14	NA	NA
Glyma.12G165000	7.22	NA	NA
Glyma.11G031800	7.83	ATG8F	Ubiquitin-like_superfamily_protein
Glyma.05G116900	7.53	ATTOM1,TOM1	tobamovirus_multiplication_1
Glyma.07G019900	4.28	NA	D-isomer_specific_2-hydroxyacid_dehydrogenase_family_protein
Glyma.07G250200	7.53	EMB40,FASS,FASS_2,FS1,GDO,TON2	tonneau_2_(TON2)
Glyma.14G145000	7.83	NA	appr-1-p_processing_enzyme_family_protein
Glyma.19G119000	6.32	ATCBR,CBR,CBR1	NADH:cytochrome_B5_reductase_1
Glyma.01G007200	8.13	ATHXK2,HXK2	hexokinase_2
Glyma.10G038000	3.87	HAP6	ribophorin_II_(RPN2)_family_protein
Glyma.09G103100	7.22	NA	NA
Glyma.19G125800	8.13	DPE2	disproportionating_enzyme_2
Glyma.18G173100	3.08	NA	Alba_DNA/RNA-binding_protein
Glyma.02G169200	7.22	PP2A-4	protein_phosphatase_2A-4
Glyma.20G161800	2.89	EMB1691	Methyltransferase_MT-A70_family_protein
Glyma.04G068700	12.64	NA	Cyclophilin-like_peptidyl-prolyl_cis-trans_isomerase_family_protein
Glyma.17G194300	6.92	NA	Exostosin_family_protein
Glyma.07G143000	3.67	NA	Concanavalin_A-like_lectin_family_protein
Glyma.09G085700	8.13	NA	NA
Glyma.15G083700	5.72	NA	Protein_of_unknown_function_(DUF1637)
Glyma.17G225800	8.73	SLOMO	F-box_family_protein
Glyma.04G036200	6.92	NA	Serine_protease_inhibitor_(SERPIN)_family_protein
Glyma.17G035800	6.32	GAL1,GALK	Mevalonate/galactokinase_family_protein
Glyma.16G020400	6.62	GIF3	GRF1-interacting_factor_3
Glyma.19G072100	6.62	PAG1	20S_proteasome_alpha_subunit_G1
Glyma.20G018600	7.83	CYP89A6	cytochrome_P450,_family_87,_subfamily_A,_polypeptide_6
Glyma.20G136200	2.71	PKP-ALPHA,PKP1	Pyruvate_kinase_family_protein
Glyma.16G009700	10.54	NA	Lung_seven_transmembrane_receptor_family_protein
Glyma.15G205900	7.53	ATTIL,TIL	temperature-induced_lipocalin
Glyma.10G270200	20.47	NA	Octicosapeptide/Phox/Bem1p_family_protein
Glyma.11G108700	4.07	NA	NA
Glyma.20G184400	7.53	NA	Cyclophilin-like_peptidyl-prolyl_cis-trans_isomerase_family_protein
Glyma.20G130500	9.17	NA	NA
Glyma.10G274600	4.48	NA	Integrase-type_DNA-binding_superfamily_protein
Glyma.07G004300	6.92	ACA9,ATACA9	autoinhibited_Ca(2+)-ATPase_9
Glyma.18G101800	8.13	NA	NA
Glyma.02G196900	7.83	NA	Ribosomal_protein_S8e_family_protein
Glyma.04G000200	3.81	ATHD1,ATHDA19,HD1,HDA1,HDA19,RPD3A	histone_deacetylase_1
Glyma.01G139600	6.02	NA	RNA_3prime-terminal_phosphate_cyclase_or_enolpyruvate_transferase,_alpha_or_beta
Glyma.02G294500	6.32	MAB1	Transketolase_family_protein
Glyma.11G075700	9.33	GMD1	GDP-D-mannose_4,6-dehydratase_1
Glyma.02G241100	8.43	AtUGP2,UGP2	UDP-glucose_pyrophosphorylase_2
Glyma.20G072400	7.22	NA	uricase_/_urate_oxidase_/_nodulin_35,_putative
Glyma.07G228100	4.48	NA	emp24/gp25L/p24_family/GOLD_family_protein
Glyma.01G008000	7.53	ATCB5LP,B5_5,CB5LP	cytochrome_B5-like_protein
Glyma.04G055900	8.43	NA	ferredoxin-related
Glyma.05G060300	10.24	ATG2484-1,G2484-1	G2484-1_protein
Glyma.10G059500	3.08	PDTPI,TIM	triosephosphate_isomerase
Glyma.01G178800	7.22	NA	PQ-loop_repeat_family_protein_/_transmembrane_family_protein
Glyma.13G317300	2.71	ATSKD1,SKD1,VPS4	AAA-type_ATPase_family_protein
Glyma.07G232900	5.72	mtLPD2	lipoamide_dehydrogenase_2
Glyma.04G255700	6.32	ATU2AF65A	U2_snRNP_auxilliary_factor,_large_subunit,_splicing_factor
Glyma.14G067000	9.03	RCA	rubisco_activase
Glyma.18G058900	5.12	ATUBA1,MOS5,UBA1	ubiquitin-activating_enzyme_1
Glyma.13G070500	5.33	NA	BAH_domain_;TFIIS_helical_bundle-like_domain
Glyma.18G071100	8.52	NA	translocation_protein-related
Glyma.19G046100	12.94	NA	Regulator_of_chromosome_condensation_(RCC1)_family_protein
Glyma.14G072200	4.9	ATIPK1,IPK1	inositol-pentakisphosphate_2-kinase_1
Glyma.08G329200	2.89	NA	DEK_domain-containing_chromatin_associated_protein
Glyma.04G007400	3.08	NA	FMN-linked_oxidoreductases_superfamily_protein
Glyma.03G229200	7.53	ATSK11,SK_11	shaggy-related_kinase_11
Glyma.16G007600	5.72	AtGRF5,GRF5	growth-regulating_factor_5
Glyma.07G001900	6.32	NA	Reticulon_family_protein
Glyma.13G135900	4.9	APRR7,PRR7	pseudo-response_regulator_7
Glyma.19G192800	5.42	BE3,SBE2.1	starch_branching_enzyme_2.1
Glyma.12G231900	9.59	NA	ATPase,_F0_complex,_subunit_B/Bprime,_bacterial/chloroplast
Glyma.18G034700	7.22	ATBPM3,BPM3	BTB/POZ/MATH-domains_containing_protein
Glyma.07G038400	6.62	AtGRF5,GRF5	growth-regulating_factor_5
Glyma.19G168100	9.63	PRP39	Tetratricopeptide_repeat_(TPR)-like_superfamily_protein
Glyma.07G253200	12.04	NA	2-oxoglutarate_(2OG)_and_Fe(II)-dependent_oxygenase_superfamily_protein
Glyma.12G078500	6.32	NA	P-loop_containing_nucleoside_triphosphate_hydrolases_superfamily_protein
Glyma.17G013000	9.33	ATG8C	Ubiquitin-like_superfamily_protein
Glyma.15G008100	7.22	NA	NA
Glyma.09G227200	6.92	NA	Ribosomal_protein_L1p/L10e_family
Glyma.05G207500	5.72	TUB6	beta-6_tubulin
Glyma.08G329100	67.43	NA	DEK_domain-containing_chromatin_associated_protein
Glyma.10G133700	7.83	MAC3B	MOS4-associated__complex_3B
Glyma.09G065300	7.53	ABX45,AS11,ATDGAT,DGAT1,RDS1,TAG1	membrane_bound_O-acyl_transferase_(MBOAT)_family_protein
Glyma.15G203300	17.16	STP7	sugar_transporter_protein_7
Glyma.13G076700	7.53	AtEIN3,EIN3	Ethylene_insensitive_3_family_protein
Glyma.19G236400	4.07	HAP5C,NF-YC9	nuclear_factor_Y,_subunit_C9
Glyma.03G262800	5.42	RPT1A	regulatory_particle_triple-A_1A
Glyma.10G272800	7.22	OVA9	glutamine-tRNA_ligase,_putative_/_glutaminyl-tRNA_synthetase,_putative_/_GlnRS,_putative
Glyma.06G112800	6.15	NA	EamA-like_transporter_family_protein
Glyma.19G222600	3.67	ROC4	rotamase_CYP_4
Glyma.06G142500	3.47	NA	Leucine-rich_repeat_protein_kinase_family_protein
Glyma.08G017800	8.13	MDAR6	monodehydroascorbate_reductase_6
Glyma.03G172200	10.24	ATEIF3A-1,ATTIF3A1,EIF3A,EIF3A-1,TIF3A1	eukaryotic_translation_initiation_factor_3A
Glyma.05G197400	3.57	NA	GroES-like_zinc-binding_alcohol_dehydrogenase_family_protein
Glyma.08G059800	3.27	NA	PapD-like_superfamily_protein
Glyma.08G113700	10.54	CIN4,COP10,EMB144,FUS9	Ubiquitin-conjugating_enzyme_family_protein
Glyma.02G301300	6.62	ATCSLE1,CSLE1	cellulose_synthase_like_E1
Glyma.01G198500	5.42	NA	NA
Glyma.01G131500	5.72	CIPK10,PKS2,SIP1,SNRK3.8	SOS3-interacting_protein_1
Glyma.01G138800	5.72	NA	Plant_protein_of_unknown_function_(DUF641)
Glyma.12G013200	7.83	ATPS3,PS3	phosphate_starvation-induced_gene_3
Glyma.08G190800	5.72	NA	SNARE-like_superfamily_protein
Glyma.11G184100	6.32	NA	NAD+_ADP-ribosyltransferases;NAD+_ADP-ribosyltransferases
Glyma.15G165200	6.89	NA	proteasome_inhibitor-related
Glyma.02G206800	11.74	NA	NA
Glyma.01G178000	9.93	BZR1	Brassinosteroid_signalling_positive_regulator_(BZR1)_family_protein
Glyma.13G362300	7.53	ATNTT1,NTT1	nucleotide_transporter_1
Glyma.02G053300	6.62	PLP3b	phosducin-like_protein_3_homolog
Glyma.15G183400	3.08	ATERDJ2A	DnaJ_/_Sec63_Brl_domains-containing_protein
Glyma.12G019400	3.08	SIR	sulfite_reductase
Glyma.03G031100	14.45	NA	ribosomal_protein_S2
Glyma.20G106300	6.92	ATTRN1,TRN1	transportin_1
Glyma.20G129100	3.47	ATTIC21,CIA5,PIC1,TIC21	translocon_at_inner_membrane_of_chloroplasts_21
Glyma.06G026100	6.62	ATBPC6,BBR/BPC6,BPC6	basic_pentacysteine_6
Glyma.13G259900	4.69	TOM2B,TTM1	tobamovirus_multiplication_2B
Glyma.05G244200	9.63	NA	NA
Glyma.07G107300	3.47	ATBPC1,BBR,BPC1	basic_pentacysteine1
Glyma.20G170000	5.12	FB,GI	gigantea_protein_(GI)
Glyma.09G043800	12.04	PRL1	pleiotropic_regulatory_locus_1
Glyma.06G171000	8.43	NA	AAA-type_ATPase_family_protein
Glyma.20G160100	8.43	ATSPPL1,SPPL1	SIGNAL_PEPTIDE_PEPTIDASE-LIKE_1
Glyma.15G123800	5.72	NA	Eukaryotic_aspartyl_protease_family_protein
Glyma.20G190900	5.42	NA	Coatomer,_alpha_subunit
Glyma.09G185700	5.12	PDF1,PP2AA2,PR_65	protein_phosphatase_2A__subunit_A2
Glyma.14G161400	8.43	NA	Protein_phosphatase_2C_family_protein
Glyma.17G128400	8.13	NOP56	homolog_of_nucleolar_protein_NOP56
Glyma.01G015400	7.53	NA	NA
Glyma.06G000500	8.43	NA	NA
Glyma.09G285400	9.27	NA	NA
Glyma.18G158900	8.13	NA	GTP_cyclohydrolase_I
Glyma.20G150900	5.72	NA	Aluminium_induced_protein_with_YGL_and_LRDR_motifs
Glyma.15G119800	5.42	NA	Bifunctional_inhibitor/lipid-transfer_protein/seed_storage_2S_albumin_superfamily_protein
Glyma.16G100600	3.67	NA	Sterile_alpha_motif_(SAM)_domain-containing_protein
Glyma.12G032400	7.53	ATSYTB,NTMC2T1.2,NTMC2TYPE1.2,SYT2,SYTB	Calcium-dependent_lipid-binding_(CaLB_domain)_family_protein
Glyma.13G047900	2.89	NA	NA
Glyma.18G164800	16.26	ERD2B	endoplasmic_reticulum_retention_defective_2B
Glyma.10G298000	2.89	ATGWD3,OK1,PWD	catalytics;carbohydrate_kinases;phosphoglucan,_water_dikinases
Glyma.10G298800	3.87	NA	NA
Glyma.05G044300	6.66	NA	Zinc_finger_C-x8-C-x5-C-x3-H_type_family_protein
Glyma.05G200600	6.02	NA	signal_recognition_particle-related_/_SRP-related
Glyma.01G009700	9.03	NA	NA
Glyma.09G209900	8.13	XLG3	extra-large_GTP-binding_protein_3
Glyma.13G072500	6.92	atnudt3,NUDT3	nudix_hydrolase_homolog_3
Glyma.01G128500	7.83	NA	NA
Glyma.06G077900	4.48	UBP1B	oligouridylate_binding_protein_1B
Glyma.12G111700	8.13	NA	Tetraspanin_family_protein
Glyma.04G030600	5.42	NA	pfkB-like_carbohydrate_kinase_family_protein
Glyma.06G111200	3.08	NA	YbaK/aminoacyl-tRNA_synthetase-associated_domain
Glyma.09G016700	5.33	AT-RAB2,ATRAB-B1B,ATRAB2A,ATRABB1C,RAB-B1B,RAB2A,RABB1C	RAB_GTPase_homolog_B1C
Glyma.10G047400	7.83	NA	NA
Glyma.01G200700	6.32	TOM2A	tobamovirus_multiplication_2A
Glyma.20G109000	2.72	NA	Sec23/Sec24_protein_transport_family_protein
Glyma.20G177400	2.71	NA	NA
Glyma.10G234200	13.55	ATSPPL1,SPPL1	SIGNAL_PEPTIDE_PEPTIDASE-LIKE_1
Glyma.15G124700	5.42	ATFRO7,FRO7	ferric_reduction_oxidase_7
Glyma.02G037700	5.72	HAP13	Clathrin_adaptor_complexes_medium_subunit_family_protein
Glyma.12G081900	9.03	AAPT1,ATAAPT1	aminoalcoholphosphotransferase_1
Glyma.17G223900	3.47	ATGPX7,GPX7	glutathione_peroxidase_7
Glyma.13G263200	6.08	NA	O-methyltransferase_family_protein
Glyma.09G132500	6.62	NA	NA
Glyma.20G233700	9.03	emb2473,MIRO1	MIRO-related_GTP-ase_1
Glyma.18G003500	2.89	NA	Sec23/Sec24_protein_transport_family_protein
Glyma.18G159500	8.43	GAUT8,QUA1	Nucleotide-diphospho-sugar_transferases_superfamily_protein
Glyma.03G073300	18.66	PAB1	proteasome_subunit_PAB1
Glyma.08G257600	6.62	AGD3,SFC,VAN3	ARF_GTPase-activating_protein
Glyma.15G108900	10.68	NA	O-Glycosyl_hydrolases_family_17_protein
Glyma.05G119100	9.63	NA	Bifunctional_inhibitor/lipid-transfer_protein/seed_storage_2S_albumin_superfamily_protein
Glyma.12G182000	4.7	NA	Ribosomal_protein_L24e_family_protein
Glyma.02G244000	6.92	ATGLN1;1,ATGSR1,GLN1;1,GSR_1	glutamine_synthase_clone_R1
Glyma.02G039700	6.62	NA	NA
Glyma.12G033600	5.42	NA	high-affinity_nickel-transport_family_protein
Glyma.17G071900	2.71	NA	Calcium-binding_EF-hand_family_protein
Glyma.17G222100	3.87	NA	NA
Glyma.13G349600	12.34	BGAL17	beta-galactosidase_17
Glyma.03G205500	8.73	NA	FAD-linked_oxidases_family_protein
Glyma.18G286200	7.83	ATHEX2,HEXO1	beta-hexosaminidase_1
Glyma.04G054100	9.03	NA	S-adenosyl-L-methionine-dependent_methyltransferases_superfamily_protein
Glyma.09G041500	10.54	ATEBP,EBP,ERF72,RAP2.3	ethylene-responsive_element_binding_protein
Glyma.09G068700	17.26	AtGRF5,GRF5	growth-regulating_factor_5
Glyma.20G040700	8.13	SMG7	Telomerase_activating_protein_Est1
Glyma.10G034800	7.46	ATBET11,ATBS14A,BET11,BS14A	BET1P/SFT1P-like_protein_14A
Glyma.02G123700	5.72	ATPI4K_GAMMA_7,PI4K_GAMMA_7,UBDK_GAMMA_7	phosphoinositide_4-kinase_gamma_7
Glyma.07G246500	6.62	NA	NA
Glyma.14G098600	6.62	ER,QRP1	Leucine-rich_receptor-like_protein_kinase_family_protein
Glyma.13G163400	9.33	TIP1	Ankyrin_repeat_family_protein_with_DHHC_zinc_finger_domain
Glyma.10G146900	11.14	NA	Uncharacterized_protein
Glyma.20G175300	9.03	NA	Ribosomal_protein_L21
Glyma.05G200000	6.02	NA	Sec14p-like_phosphatidylinositol_transfer_family_protein
Glyma.10G295100	5.26	ATGSL10,CALS9,gsl10	glucan_synthase-like_10
Glyma.09G090300	16.56	NA	NA
Glyma.05G131300	3.47	NA	NA
Glyma.07G021900	8.43	NA	NA
Glyma.08G222300	3.08	NA	O-fucosyltransferase_family_protein
Glyma.05G133700	4.28	LYM2	lysm_domain_GPI-anchored_protein_2_precursor
Glyma.12G018400	6.62	NA	methionine--tRNA_ligase,_putative_/_methionyl-tRNA_synthetase,_putative_/_MetRS,_putative
Glyma.05G232700	10.54	NA	alpha/beta-Hydrolases_superfamily_protein
Glyma.20G224000	6.66	NA	Duplicated_homeodomain-like_superfamily_protein
Glyma.20G025100	14.45	PUR_ALPHA-1	purin-rich_alpha_1
Glyma.09G234000	4.48	NA	cobalt_ion_binding
Glyma.11G022100	6.02	NA	Protein_of_unknown_function_(DUF604)
Glyma.08G328700	6.02	NA	NA
Glyma.08G255000	6.32	NA	Ribosomal_RNA_processing_Brix_domain_protein
Glyma.14G172600	5.42	NA	Major_facilitator_superfamily_protein
Glyma.05G218100	9.03	KELP	transcriptional_coactivator_p15_(PC4)_family_protein_(KELP)
Glyma.01G169700	6.32	UBC16	ubiquitin-conjugating_enzyme_16
Glyma.12G084700	10.24	HD2C,HDT3	histone_deacetylase_2C
Glyma.16G043900	7.53	NA	Protein_of_unknown_function_DUF106,_transmembrane
Glyma.10G005500	10.24	CI51	51_kDa_subunit_of_complex_I
Glyma.11G018300	7.22	SEH1H	Transducin/WD40_repeat-like_superfamily_protein
Glyma.07G002800	3.47	RAD23,RAD23B	Rad23_UV_excision_repair_protein_family
Glyma.05G001800	3.65	GAUT3	galacturonosyltransferase_3
Glyma.17G246600	9.03	SEC3A	exocyst_complex_component_sec3A
Glyma.02G303500	8.43	AAP7	amino_acid_permease_7
Glyma.20G189300	6.02	NA	Pyruvate_kinase_family_protein
Glyma.15G127700	7.83	NA	Root_hair_defective_3_GTP-binding_protein_(RHD3)
Glyma.02G271500	6.02	UBP12	ubiquitin-specific_protease_12
Glyma.16G113000	6.62	HMG1,HMGR1	hydroxy_methylglutaryl_CoA_reductase_1
Glyma.02G158700	6.62	DFR,M318,TT3	dihydroflavonol_4-reductase
Glyma.19G017300	8.13	NA	Leucine-rich_repeat_protein_kinase_family_protein
Glyma.04G236900	6.62	GLT1	NADH-dependent_glutamate_synthase_1
Glyma.15G255900	6.02	EIF2_GAMMA	eukaryotic_translation_initiation_factor_2_gamma_subunit
Glyma.17G111500	13.41	NA	BED_zinc_finger_;hAT_family_dimerisation_domain
Glyma.02G143100	11.44	NA	Protein_of_unknown_function_(DUF506)_
Glyma.02G032800	6.62	NA	Threonyl-tRNA_synthetase
Glyma.11G017600	15.35	NA	NA
Glyma.13G003700	6.4	NA	heat_shock_protein_70_(Hsp_70)_family_protein
Glyma.09G210800	7.22	NA	SCAMP_family_protein
Glyma.05G014200	5.63	NA	Nucleic_acid-binding,_OB-fold-like_protein
Glyma.12G240400	8.43	NA	Emsy_N_Terminus_(ENT)/_plant_Tudor-like_domains-containing_protein
Glyma.13G275400	3.12	ALF5	MATE_efflux_family_protein
Glyma.18G140800	8.13	TBL2	Plant_protein_of_unknown_function_(DUF828)
Glyma.12G232000	9.42	NA	ATP_synthase_subunit_alpha
Glyma.12G009500	7.83	NA	NA
Glyma.02G096000	11.44	NA	Small_nuclear_ribonucleoprotein_family_protein
Glyma.02G259800	7.53	NA	NA
Glyma.14G090400	3.08	SQE1,XF1	FAD/NAD(P)-binding_oxidoreductase_family_protein
Glyma.08G163700	8.43	ALDH5F1,SSADH,SSADH1	aldehyde_dehydrogenase_5F1
Glyma.02G203800	6.62	ATWRKY32,WRKY32	WRKY_DNA-binding_protein_32
Glyma.13G325400	3.27	NA	SIT4_phosphatase-associated_family_protein
Glyma.19G111000	5.42	GDH1	glutamate_dehydrogenase_1
Glyma.12G181300	4.48	ATU2AF35B,U2AF35B	Zinc_finger_C-x8-C-x5-C-x3-H_type_family_protein
Glyma.11G078100	18.66	ATMCB1,MBP1,MCB1,RPN10	regulatory_particle_non-ATPase_10
Glyma.16G027100	8.13	ADNT1	adenine_nucleotide_transporter_1
Glyma.18G184900	6.62	NA	2-oxoglutarate_(2OG)_and_Fe(II)-dependent_oxygenase_superfamily_protein
Glyma.19G145400	12.34	NA	Calcium-dependent_lipid-binding_(CaLB_domain)_plant_phosphoribosyltransferase_family_protein
Glyma.15G133000	3.08	NA	NA
Glyma.02G220800	2.95	SCL30A	SC35-like_splicing_factor_30A
Glyma.11G014000	10.54	NA	esterase/lipase/thioesterase_family_protein
Glyma.13G116000	8.73	NA	Ankyrin_repeat_family_protein
Glyma.13G284600	3.27	DFL1,GH3.6	Auxin-responsive_GH3_family_protein
Glyma.03G151500	20.47	ATGPX4,GPX4	glutathione_peroxidase_4
Glyma.14G043500	7.53	ATTSC13,CER10,ECR,TSC13	3-oxo-5-alpha-steroid_4-dehydrogenase_family_protein
Glyma.05G078000	6.32	NA	Ribosomal_protein_S24e_family_protein
Glyma.18G131200	12.94	NA	NA
Glyma.12G167500	9.33	NA	Protein_of_unknown_function_(DUF1682)
Glyma.15G170200	9.23	NA	Translation_initiation_factor_SUI1_family_protein
Glyma.06G061100	14.15	NA	Sas10/Utp3/C1D_family
Glyma.17G225200	5.72	AL5	alfin-like_5
Glyma.07G008000	2.89	NA	SNARE-like_superfamily_protein
Glyma.08G334100	8.73	NA	RNA-binding_(RRM/RBD/RNP_motifs)_family_protein
Glyma.15G212800	6.32	SPK1	guanyl-nucleotide_exchange_factors;GTPase_binding;GTP_binding
Glyma.08G348000	7.83	GAUT8,QUA1	Nucleotide-diphospho-sugar_transferases_superfamily_protein
Glyma.07G243600	5.42	MLP423	MLP-like_protein_423
Glyma.05G203800	7.83	NA	tubulin_folding_cofactor_B
Glyma.13G163100	6.92	NA	NA
Glyma.16G131800	7.83	BGAL3	beta-galactosidase_3
Glyma.03G157900	7.83	NA	Cyclophilin-like_peptidyl-prolyl_cis-trans_isomerase_family_protein
Glyma.19G075700	3.87	COP13,CSN3,FUS11	Proteasome_component_(PCI)_domain_protein
Glyma.08G005900	7.83	ATRBOHC,RBOHC,RHD2	NADPH/respiratory_burst_oxidase_protein_D
Glyma.13G185100	6.02	SC3	secretory_carrier_3
Glyma.19G160800	7.53	NA	Aldolase-type_TIM_barrel_family_protein
Glyma.11G064300	4.07	BZR1	Brassinosteroid_signalling_positive_regulator_(BZR1)_family_protein
Glyma.06G155700	20.47	FCLY	farnesylcysteine_lyase
Glyma.16G118400	10.24	DSK2	ubiquitin_family_protein
Glyma.14G151400	6.02	AVA-P4	vacuolar_H+-pumping_ATPase_16_kDa_proteolipid_subunit_4
Glyma.01G015100	12.34	NA	Plastid-lipid_associated_protein_PAP_/_fibrillin_family_protein
Glyma.18G104600	4.48	PAPP5,PP5,PP5.2	protein_phosphatase_5.2
Glyma.10G170500	46.06	UCH2	Peptidase_C12,_ubiquitin_carboxyl-terminal_hydrolase_1
Glyma.20G247200	6.66	NA	Nse4,_component_of_Smc5/6_DNA_repair_complex
Glyma.13G062700	6.32	AtSS2,SS2	starch_synthase_2
Glyma.10G012000	5.42	NA	Protein_kinase_superfamily_protein
Glyma.06G169600	4.28	ATHAP5A,HAP5A,NF-YC1	nuclear_factor_Y,_subunit_C1
Glyma.17G237500	4.07	WPP1	WPP_domain_protein_1
Glyma.11G141500	10.84	NA	RNA-binding_(RRM/RBD/RNP_motifs)_family_protein
Glyma.19G006700	5.72	NA	Adenine_nucleotide_alpha_hydrolases-like_superfamily_protein
Glyma.20G100400	5.12	NA	Prolyl_oligopeptidase_family_protein
Glyma.06G162900	9.63	NA	NA
Glyma.08G173500	7.53	emb1507	U5_small_nuclear_ribonucleoprotein_helicase,_putative
Glyma.06G051000	3.08	NA	NA
Glyma.02G120200	14.15	PGL1	6-phosphogluconolactonase_1
Glyma.09G050700	6.92	NA	Haloacid_dehalogenase-like_hydrolase_(HAD)_superfamily_protein
Glyma.08G126900	8.13	AtTMN1,TMN1	transmembrane_nine_1
Glyma.09G264400	6.92	NA	Ribosomal_protein_L22p/L17e_family_protein
Glyma.11G126500	6.02	SKIP16	SKP1/ASK-interacting_protein_16
Glyma.18G156500	2.89	MPPBETA	Insulinase_(Peptidase_family_M16)_protein
Glyma.14G041500	5.42	AtEIN3,EIN3	Ethylene_insensitive_3_family_protein
Glyma.15G272000	7.83	NA	SWAP_(Suppressor-of-White-APricot)/surp_domain-containing_protein_/_D111/G-patch_domain-containing_protein
Glyma.20G106800	6.92	NA	Protein_phosphatase_2C_family_protein
Glyma.U031300	8.43	ATSAT32,SAT32	interferon-related_developmental_regulator_family_protein_/_IFRD_protein_family
Glyma.16G168000	9.93	NA	Inositol_monophosphatase_family_protein
Glyma.01G236300	7.83	ATTSO1,TSO1	Tesmin/TSO1-like_CXC_domain-containing_protein
Glyma.07G216900	7.83	NA	hydroxyproline-rich_glycoprotein_family_protein
Glyma.07G224600	6.92	PSL4	calmodulin-binding_protein
Glyma.01G100900	11.14	NA	Metal-dependent_protein_hydrolase
Glyma.19G176200	10.24	RSZ32	RNA-binding_(RRM/RBD/RNP_motifs)_family_protein_with_retrovirus_zinc_finger-like_domain
Glyma.10G022000	5.72	FIE,FIE1,FIS3	Transducin/WD40_repeat-like_superfamily_protein
Glyma.17G021800	6.32	CLA,CLA1,DEF,DXPS2,DXS	Deoxyxylulose-5-phosphate_synthase
Glyma.03G083100	5.42	NA	UDP-Glycosyltransferase_superfamily_protein
Glyma.20G113400	9.33	NA	Uncharacterized_protein_family_(UPF0016)
Glyma.05G090900	7.22	CRK	CDPK-related_kinase
Glyma.18G188700	5.33	PRA1.A1	prenylated_RAB_acceptor_1.A1
Glyma.08G354400	5.72	PRT1	proteolysis_1
Glyma.09G124800	6.92	MMZ1,UEV1A	MMS_ZWEI_homologue_1
Glyma.16G215500	5.72	NA	Translation_initiation_factor_eIF3_subunit
Glyma.02G282400	7.53	NA	Reticulon_family_protein
Glyma.19G248000	5.72	NA	Ankyrin_repeat_family_protein
Glyma.08G186800	3.87	CDC48C,emb1354	cell_division_cycle_48C
Glyma.18G183900	8.43	SMP1	Pre-mRNA_splicing_Prp18-interacting_factor
Glyma.06G275700	13.85	ASP1	aspartate_aminotransferase_1
Glyma.11G192500	3.27	RPL9	ribosomal_protein_L9
Glyma.10G038600	5.72	CKL6,PAPK1	casein_kinase_I-like_6
Glyma.03G159000	8.43	NA	alpha/beta-Hydrolases_superfamily_protein
Glyma.07G002500	6.02	NA	NA
Glyma.20G227900	11.44	PDE181,SPC1,ZDS	zeta-carotene_desaturase
Glyma.14G010200	5.12	NA	CCCH-type_zinc_fingerfamily_protein_with_RNA-binding_domain
Glyma.05G240800	2.89	NA	Small_nuclear_ribonucleoprotein_family_protein
Glyma.19G012300	4.07	NA	BAH_domain_;TFIIS_helical_bundle-like_domain
Glyma.01G008500	5.12	ATNADP-ME4,NADP-ME4	NADP-malic_enzyme_4
Glyma.06G150900	8.73	NA	Protein_of_unknown_function_(DUF167)
Glyma.04G080400	2.71	NA	NA
Glyma.19G261700	7.83	SRF6	STRUBBELIG-receptor_family_6
Glyma.20G214100	3.08	NA	RING/FYVE/PHD_zinc_finger_superfamily_protein
Glyma.13G150900	11.14	ELL1,FK,HYD2	Ergosterol_biosynthesis_ERG4/ERG24_family
Glyma.09G007900	7.53	NA	Phosphofructokinase_family_protein
Glyma.07G267700	9.33	NA	Heavy_metal_transport/detoxification_superfamily_protein_
Glyma.02G275500	7.18	AKINBETA1	5prime-AMP-activated_protein_kinase_beta-2_subunit_protein
Glyma.09G035500	6.62	HY3,OOP1,PHYB	phytochrome_B
Glyma.15G130100	6.32	ATRFNR1,RFNR1	root_FNR_1
Glyma.08G333100	2.89	NA	Got1/Sft2-like_vescicle_transport_protein_family
Glyma.17G165200	5.72	ATNRAMP3,NRAMP3	natural_resistance-associated_macrophage_protein_3
Glyma.02G012100	13.85	EZA1,SDG10,SWN	SET_domain-containing_protein
Glyma.04G256100	7.53	MTHFR2	methylenetetrahydrofolate_reductase_2
Glyma.11G244500	10.2	NA	ARM_repeat_superfamily_protein
Glyma.08G101100	6.32	NA	SRP72_RNA-binding_domain
Glyma.14G023900	174.6	PMSR4	peptide_met_sulfoxide_reductase_4
Glyma.19G082500	4.71	emb1220	pre-mRNA_processing_ribonucleoprotein_binding_region-containing_protein
Glyma.11G141200	9.33	UXS6	UDP-XYL_synthase_6
Glyma.03G137000	7.53	ABAR,CCH,CCH1,CHLH,GUN5	magnesium-chelatase_subunit_chlH,_chloroplast,_putative_/_Mg-protoporphyrin_IX_chelatase,_putative_(CHLH)
Glyma.08G195900	10.24	ATUBP6,UBP6	ubiquitin-specific_protease_6
Glyma.18G262500	10.84	ATPME31,PME31	pectin_methylesterase_31
Glyma.08G200500	7.22	PAPS2	poly(A)_polymerase_2
Glyma.13G171000	11.44	NA	NA
Glyma.01G125100	7.53	NA	Nucleic_acid-binding,_OB-fold-like_protein
Glyma.08G071300	9.03	EXL2	EXORDIUM_like_2
Glyma.11G228300	6.62	AUX1,MAP1,PIR1,WAV5	Transmembrane_amino_acid_transporter_family_protein
Glyma.20G210500	5.72	ATAUX2-11,IAA4	AUX/IAA_transcriptional_regulator_family_protein
Glyma.08G360900	8.43	ATSPPL3,SPPL3	SIGNAL_PEPTIDE_PEPTIDASE-LIKE_3
Glyma.16G063200	8.73	G6PD6	glucose-6-phosphate_dehydrogenase_6
Glyma.02G220400	6.62	NA	Transducin/WD40_repeat-like_superfamily_protein
Glyma.20G054600	6.62	UBP13	ubiquitin-specific_protease_13
Glyma.12G122700	10.24	MENG	S-adenosyl-L-methionine-dependent_methyltransferases_superfamily_protein
Glyma.13G104300	12.34	NA	Protein_kinase_superfamily_protein
Glyma.18G211900	3.47	NA	saposin_B_domain-containing_protein
Glyma.10G089500	3.27	PSBTN	photosystem_II_subunit_T
Glyma.02G047600	5.72	ATLFNR1,FNR1	ferredoxin-NADP(+)-oxidoreductase_1
Glyma.01G170200	6.92	BGAL3	beta-galactosidase_3
Glyma.07G111900	6.32	NA	Plant_protein_of_unknown_function_(DUF247)
Glyma.10G141000	5.42	NA	Protein_of_unknown_function_(DUF300)
Glyma.05G133900	8.13	NA	NAD(P)-binding_Rossmann-fold_superfamily_protein
Glyma.18G284700	2.71	ACR4	ACT_domain_repeat_4
Glyma.01G200000	2.71	NA	NA
Glyma.17G058000	2.71	NA	NA
Glyma.12G206400	5.55	ATCBP20,CBP20	CAP-binding_protein_20
Glyma.06G209000	8.43	NF-YB13	nuclear_factor_Y,_subunit_B13
Glyma.01G020300	7.22	NA	Zincin-like_metalloproteases_family_protein
Glyma.19G125600	6.62	GTB1	global_transcription_factor_group_B1
Glyma.20G144400	8.43	TIC	time_for_coffee
Glyma.13G242000	8.73	NA	NA
Glyma.07G042800	3.47	NA	sequence-specific_DNA_binding_transcription_factors
Glyma.12G033500	6.32	ATPIS,ATPIS1,PIS1	phosphatidylinositol_synthase_1
Glyma.15G260000	6.89	PAB1	proteasome_subunit_PAB1
Glyma.14G000600	6.92	NA	Nucleotide-sugar_transporter_family_protein
Glyma.10G102200	5.12	NA	NA
Glyma.16G004400	7.53	NA	Dihydrolipoamide_acetyltransferase,_long_form_protein
Glyma.20G121100	2.87	NA	Octicosapeptide/Phox/Bem1p_family_protein
Glyma.18G038600	3.47	ATSOS4,SOS4	pfkB-like_carbohydrate_kinase_family_protein
Glyma.03G167000	2.89	PRP39	Tetratricopeptide_repeat_(TPR)-like_superfamily_protein
Glyma.20G241500	4.42	A11,CFI,TT5	Chalcone-flavanone_isomerase_family_protein
Glyma.08G335900	7.22	ATHAP2A,EMB2220,HAP2A,NF-YA1	nuclear_factor_Y,_subunit_A1
Glyma.03G248500	6.51	NA	NAD(P)-linked_oxidoreductase_superfamily_protein
Glyma.09G225200	7.22	UBP24	ubiquitin-specific_protease_24
Glyma.19G143300	6.62	NA	Leucine-rich_repeat_receptor-like_protein_kinase_family_protein
Glyma.17G002000	6.02	ATCAND1,CAND1,ETA2,HVE,TIP120	cullin-associated_and_neddylation_dissociated
Glyma.20G024400	7.83	NA	antitermination_NusB_domain-containing_protein
Glyma.10G249300	9.93	TIC	time_for_coffee
Glyma.13G027800	6.02	UBP13	ubiquitin-specific_protease_13
Glyma.13G194600	5.33	NA	Disease_resistance_protein_(TIR-NBS-LRR_class)_family
Glyma.17G045400	5.72	NA	Phosphoinositide_phosphatase_family_protein
Glyma.13G274100	6.62	ATERF-4,ATERF4,ERF4,RAP2.5	ethylene_responsive_element_binding_factor_4
Glyma.11G141100	3.27	NA	SEC14_cytosolic_factor_family_protein_/_phosphoglyceride_transfer_family_protein
Glyma.17G112500	5.72	TPR4,WSIP2	WUS-interacting_protein_2
Glyma.09G067700	2.71	PSBX	photosystem_II_subunit_X
Glyma.19G036900	3.08	NA	cyclin-dependent_kinase-activating_kinase_assembly_factor-related_/_CDK-activating_kinase_assembly_factor-related
Glyma.15G198300	5.72	NA	ubiquitin-associated_(UBA)/TS-N_domain-containing_protein
Glyma.13G000800	4.9	NA	NA
Glyma.14G190300	3.08	XERICO	RING/U-box_superfamily_protein
Glyma.05G015100	10.54	NF-YB13	nuclear_factor_Y,_subunit_B13
Glyma.06G076100	7.22	AHA5,HA5	H(+)-ATPase_5
Glyma.06G139900	3.27	NA	Transducin/WD40_repeat-like_superfamily_protein
Glyma.05G062200	8.43	ACX1,ATACX1	acyl-CoA_oxidase_1
Glyma.17G219600	2.89	CID7	CTC-interacting_domain_7
Glyma.08G066600	3.67	ALDH6B2	aldehyde_dehydrogenase__6B2
Glyma.17G130200	6.62	NA	NAD(P)-binding_Rossmann-fold_superfamily_protein
Glyma.20G210600	7.83	NA	Protein_of_unknown_function_(DUF2361)
Glyma.18G036300	5.12	PUR4	purine_biosynthesis_4
Glyma.14G078100	6.62	RPS9,TWN3	ribosomal_protein_S9
Glyma.14G068900	6.92	NA	ARM_repeat_superfamily_protein
Glyma.10G293500	10.84	NA	Transketolase
Glyma.06G130700	8.73	NA	RNA-binding_KH_domain-containing_protein
Glyma.01G047100	9.03	NA	GDA1/CD39_nucleoside_phosphatase_family_protein
Glyma.12G113200	10.24	NA	Protein_of_unknown_function_(DUF1421)
Glyma.U033300	7.53	NA	NA
Glyma.08G043000	6.62	JAI3,JAZ3,TIFY6B	jasmonate-zim-domain_protein_3
Glyma.01G054200	2.89	ARC12,ATMINE1,MINE1	homologue_of_bacterial_MinE_1
Glyma.03G158400	15.65	NA	Aldolase-type_TIM_barrel_family_protein
Glyma.08G351200	3.47	ERD2B	endoplasmic_reticulum_retention_defective_2B
Glyma.07G250900	9.33	NA	CHY-type/CTCHY-type/RING-type_Zinc_finger_protein
Glyma.17G047200	8.13	ATCPN21,CHCPN10,CPN10,CPN20,CPN21	chaperonin_20
Glyma.14G223500	6.35	CAT2	catalase_2
Glyma.07G131900	8.13	NA	NA
Glyma.18G227100	7.83	NA	F-box_family_protein
Glyma.05G053600	6.21	CLP2,CLPR2,NCLPP2	CLP_protease_proteolytic_subunit_2
Glyma.19G107300	6.32	ACS	acetyl-CoA_synthetase
Glyma.01G119400	4.9	ATEBP1,ATG2,EBP1	metallopeptidase_M24_family_protein
Glyma.02G057800	3.08	NA	Leucine-rich_repeat_(LRR)_family_protein
Glyma.08G043800	6.32	NA	Plant_invertase/pectin_methylesterase_inhibitor_superfamily_protein
Glyma.07G014500	10.24	NA	HAD_superfamily,_subfamily_IIIB_acid_phosphatase_
Glyma.18G166600	2.71	NA	GPI_transamidase_component_PIG-S-related
Glyma.04G019700	10.24	NA	Prolyl_oligopeptidase_family_protein
Glyma.07G214600	14.15	NA	RING/U-box_superfamily_protein
Glyma.19G246600	3.08	AN3,ATGIF1,GIF,GIF1	SSXT_family_protein
Glyma.13G240200	2.89	SDE5	silencing_defective_5
Glyma.08G207800	6.62	EMB2753	tetratricopeptide_repeat_(TPR)-containing_protein
Glyma.12G053200	2.89	NA	NA
Glyma.07G058400	6.62	AFH1,AHF1,ATFH1,FH1	formin_homology_1
Glyma.05G053100	8.13	KEU	Sec1/munc18-like_(SM)_proteins_superfamily
Glyma.15G100700	7.53	MSRB2	methionine_sulfoxide_reductase_B_2
Glyma.08G107800	6.02	AK-HSDH,AK-HSDH_II	aspartate_kinase-homoserine_dehydrogenase_ii
Glyma.15G006300	7.22	NA	Calcium-binding_EF-hand_family_protein
Glyma.11G034100	6.02	NA	ATP_binding;leucine-tRNA_ligases;aminoacyl-tRNA_ligases;nucleotide_binding;ATP_binding;aminoacyl-tRNA_ligases
Glyma.06G314400	10.54	AREB3,DPBF3	ABA-responsive_element_binding_protein_3
Glyma.15G172100	6.32	EMB1989,NRPB2,RPB2	DNA-directed_RNA_polymerase_family_protein
Glyma.15G188500	7.22	ATPDHK,PDK	pyruvate_dehydrogenase_kinase
Glyma.04G125800	7.53	VPS26A	vacuolar_protein_sorting_26A
Glyma.12G074600	6.62	HERK1	hercules_receptor_kinase_1
Glyma.20G074000	3.34	URED	urease_accessory_protein_D
Glyma.19G242300	20.47	ATCYS-3A,CYTACS1,OASA1,OLD3	O-acetylserine_(thiol)_lyase_(OAS-TL)_isoform_A1
Glyma.01G177300	7.83	HVA22K	HVA22-like_protein_K
Glyma.01G159500	5.72	DSK2	ubiquitin_family_protein
Glyma.10G191400	9.03	NA	RNA-binding_(RRM/RBD/RNP_motifs)_family_protein
Glyma.19G132800	10.54	NA	Calcium-binding_EF-hand_family_protein
Glyma.08G038700	7.22	NA	Regulator_of_Vps4_activity_in_the_MVB_pathway_protein
Glyma.17G040000	6.92	NA	Protein_kinase_superfamily_protein
Glyma.15G137800	4.69	NA	Chaperone_DnaJ-domain_superfamily_protein
Glyma.18G300700	27.69	ATSPPL3,SPPL3	SIGNAL_PEPTIDE_PEPTIDASE-LIKE_3
Glyma.15G139100	3.08	PFD3	prefoldin_3
Glyma.07G256500	7.83	NA	CBS_domain-containing_protein_with_a_domain_of_unknown_function_(DUF21)
Glyma.03G250100	3.47	APM4,ATPEX12,PEX12	peroxin-12
Glyma.14G085900	5.12	NA	Mannose-P-dolichol_utilization_defect_1_protein
Glyma.08G206900	8.43	HSP91	heat_shock_protein_91
Glyma.01G123300	7.83	ATBAG4,BAG4	BCL-2-associated_athanogene_4
Glyma.14G025900	3.87	NA	Small_nuclear_ribonucleoprotein_family_protein
Glyma.07G128900	3.27	NA	NA
Glyma.06G041000	8.13	NA	RING/U-box_superfamily_protein
Glyma.02G091200	12.34	CLPP3,NCLPP3	CLP_protease_proteolytic_subunit_3
Glyma.11G190600	12.04	NA	GDSL-like_Lipase/Acylhydrolase_superfamily_protein
Glyma.13G246700	7.22	NA	ARM_repeat_superfamily_protein
Glyma.13G213500	2.89	CLA,CLA1,DEF,DXPS2,DXS	Deoxyxylulose-5-phosphate_synthase
Glyma.04G070200	6.32	LUG,RON2	LisH_dimerisation_motif;WD40/YVTN_repeat-like-containing_domain
Glyma.12G009700	3.03	NA	Protein_of_unknown_function_(DUF3411)
Glyma.19G120000	8.43	NA	GDSL-like_Lipase/Acylhydrolase_superfamily_protein
Glyma.12G146600	2.9	ATUBP14,PER1,TTN6,UBP14	ubiquitin-specific_protease_14
Glyma.05G118500	3.35	NA	Endoplasmic_reticulum_vesicle_transporter_protein
Glyma.01G208100	3.67	NA	ATP_binding;leucine-tRNA_ligases;aminoacyl-tRNA_ligases;nucleotide_binding;ATP_binding;aminoacyl-tRNA_ligases
Glyma.01G144900	25.89	AtGRF9,GRF9	growth-regulating_factor_9
Glyma.11G181900	6.66	ATVAMP714,VAMP714	vesicle-associated_membrane_protein_714
Glyma.20G245600	6.92	NA	Protein_kinase_superfamily_protein
Glyma.08G327500	7.12	NA	Ribosomal_protein_S10p/S20e_family_protein
Glyma.17G143000	2.71	NA	NA
Glyma.04G209100	8.43	AAP2	amino_acid_permease_2
Glyma.07G035000	5.54	NA	Dihydrolipoamide_acetyltransferase,_long_form_protein
Glyma.09G019700	6.92	NA	Kinase-related_protein_of_unknown_function_(DUF1296)
Glyma.13G235000	6.92	HSL1	HAESA-like_1
Glyma.09G123600	3.51	JAI3,JAZ3,TIFY6B	jasmonate-zim-domain_protein_3
Glyma.08G361700	16.86	NA	Protein_kinase_family_protein
Glyma.09G233200	3.08	NA	nucleotide-sensitive_chloride_conductance_regulator_(ICln)_family_protein
Glyma.14G213300	6.92	ATGLN1;1,ATGSR1,GLN1;1,GSR_1	glutamine_synthase_clone_R1
Glyma.11G021000	4.69	ATSGT1B,EDM1,ETA3,RPR1,SGT1B	phosphatase-related
Glyma.06G217900	22.32	NA	photosystem_II_reaction_center_protein_D
Glyma.13G289600	7.53	NA	DNAJ_heat_shock_N-terminal_domain-containing_protein
Glyma.10G051100	3.67	UBQ4	ubiquitin_4
Glyma.17G168200	4.48	ATRER1A	Rer1_family_protein
Glyma.02G036200	3.47	NA	signal_recognition_particle_binding
Glyma.07G268500	6.32	NA	Thiolase_family_protein
Glyma.15G032300	3.87	NA	Histone_superfamily_protein
Glyma.02G251700	7.22	NA	nucleotide_binding;protein_binding
Glyma.09G015100	3.08	NA	Sec14p-like_phosphatidylinositol_transfer_family_protein
Glyma.13G075700	15.35	NA	Bifunctional_inhibitor/lipid-transfer_protein/seed_storage_2S_albumin_superfamily_protein
Glyma.02G156800	9.63	NA	Concanavalin_A-like_lectin_protein_kinase_family_protein
Glyma.12G109500	8.43	NA	Protein_phosphatase_2C_family_protein
Glyma.14G017800	7.53	PPX-2,PPX2	protein_phosphatase_X_2
Glyma.11G034600	3.47	ATMSH4,MSH4	MUTS-like_protein_4
Glyma.03G180000	10.54	ATFLA11,FLA11	FASCICLIN-like_arabinogalactan-protein_11
Glyma.10G107400	7.22	NA	NA
Glyma.19G033600	5.55	COBL4,IRX6	COBRA-like_extracellular_glycosyl-phosphatidyl_inositol-anchored_protein_family
Glyma.05G124500	5.42	NA	Protein_with_RING/U-box_and_TRAF-like_domains
Glyma.14G184500	6.62	SHM2	serine_hydroxymethyltransferase_2
Glyma.11G107200	7.83	APX3	ascorbate_peroxidase_3
Glyma.07G130900	25.76	NA	G10_family_protein
Glyma.15G029800	12.34	NA	pfkB-like_carbohydrate_kinase_family_protein
Glyma.17G254100	7.53	BGAL5	beta-galactosidase_5
Glyma.20G195200	7.83	NA	NA
Glyma.15G176500	5.12	AtGRF5,GRF5	growth-regulating_factor_5
Glyma.10G205500	2.89	ATPPC4,PPC4	phosphoenolpyruvate_carboxylase_4
Glyma.03G076900	2.71	DEX1	defective_in_exine_formation_protein_(DEX1)
Glyma.04G149900	7.22	NA	alpha/beta-Hydrolases_superfamily_protein
Glyma.11G189600	6.62	ATCSLA02,ATCSLA2,CSLA02,CSLA2	cellulose_synthase-like_A02
Glyma.15G057800	8.43	NA	Chaperone_DnaJ-domain_superfamily_protein
Glyma.17G257100	7.12	AtXRN3,XRN3	5prime-3prime_exoribonuclease_3
Glyma.U027900	7.53	AtIPCS1	Arabidopsis_Inositol_phosphorylceramide_synthase_1
Glyma.15G196800	6.32	AML5,ML5	MEI2-like_protein_5
Glyma.17G176300	6.92	NA	Transducin/WD40_repeat-like_superfamily_protein
Glyma.14G106500	4.07	CID7	CTC-interacting_domain_7
Glyma.08G109000	7.83	AIR3	Subtilisin-like_serine_endopeptidase_family_protein
Glyma.01G119500	3.08	ATAMPD,FAC1	AMP_deaminase,_putative_/_myoadenylate_deaminase,_putative
Glyma.14G001000	2.71	DMR1,HSK	homoserine_kinase
Glyma.09G225600	8.43	NA	Zinc_finger_(CCCH-type)_family_protein_/_RNA_recognition_motif_(RRM)-containing_protein
Glyma.11G016200	6.32	CYP97B3	cytochrome_P450,_family_97,_subfamily_B,_polypeptide_3
Glyma.10G197600	7.53	anac078,NAC2	NAC_domain_containing_protein_2
Glyma.13G256800	5.77	NA	Cysteine_proteinases_superfamily_protein
Glyma.15G126000	5.42	NA	Kinase-related_protein_of_unknown_function_(DUF1296)
Glyma.05G208900	7.53	CYP86A8,LCR	cytochrome_P450,_family_86,_subfamily_A,_polypeptide_8
Glyma.10G291200	4.48	PTAC17	plastid_transcriptionally_active_17
Glyma.11G194700	7.53	ATGCN1,GCN1	ABC_transporter_family_protein
Glyma.12G107600	6.62	NA	NA
Glyma.20G216500	7.53	NA	Endosomal_targeting_BRO1-like_domain-containing_protein
Glyma.17G161800	6.66	NA	Protein_kinase_superfamily_protein
Glyma.06G165400	6.32	SCPL45	serine_carboxypeptidase-like_45
Glyma.06G223800	2.71	ATCNGC17,CNGC17	cyclic_nucleotide-gated_channel_17
Glyma.10G263500	7.53	CYCD3,CYCD3;1	CYCLIN_D3;1
Glyma.04G019600	6.02	ATECH2,ECH2	enoyl-CoA_hydratase_2
Glyma.04G023100	4.9	NA	RING/FYVE/PHD_zinc_finger_superfamily_protein
Glyma.06G260300	6.68	ATB2	NAD(P)-linked_oxidoreductase_superfamily_protein
Glyma.16G198200	7.35	SLK2	SEUSS-like_2
Glyma.13G249900	80.07	NA	plastid_developmental_protein_DAG,_putative
Glyma.15G025800	5.42	NA	ATPase_E1-E2_type_family_protein_/_haloacid_dehalogenase-like_hydrolase_family_protein
Glyma.11G118100	4.07	NA	BTB/POZ_domain-containing_protein
Glyma.18G071500	4.07	PA200	proteasome_activating_protein_200
Glyma.19G112600	7.22	NA	Protein_of_unknown_function_(DUF1639)
Glyma.09G195300	4.28	NA	NA
Glyma.16G000300	6.92	ARF1	auxin_response_factor_1
Glyma.08G171800	6.11	NA	NA
Glyma.06G072200	6.92	LUG,RON2	LisH_dimerisation_motif;WD40/YVTN_repeat-like-containing_domain
Glyma.05G209900	15.35	NA	PLAC8_family_protein
Glyma.05G155100	7.83	NA	P-loop_containing_nucleoside_triphosphate_hydrolases_superfamily_protein
Glyma.04G230800	6.02	NA	NA
Glyma.01G245100	8.13	ATHD1,ATHDA19,HD1,HDA1,HDA19,RPD3A	histone_deacetylase_1
Glyma.19G166100	6.32	CKL6,PAPK1	casein_kinase_I-like_6
Glyma.03G216700	7.53	ERS,ERS1	ethylene_response_sensor_1
Glyma.04G213300	6.32	anac082,NAC082,VNI1	NAC_domain_containing_protein_82
Glyma.13G066500	5.83	NA	Oxoglutarate/iron-dependent_oxygenase
Glyma.18G160200	7.22	NA	SMAD/FHA_domain-containing_protein_
Glyma.15G148800	7.83	ATKINESIN-13A,KINESIN-13A	P-loop_containing_nucleoside_triphosphate_hydrolases_superfamily_protein
Glyma.03G239300	6.02	NA	NA
Glyma.08G329500	14.75	NA	RNA-binding_(RRM/RBD/RNP_motifs)_family_protein
Glyma.17G157100	11.44	NA	NA
Glyma.02G259000	7.53	NA	Aldolase-type_TIM_barrel_family_protein
Glyma.18G074600	7.22	NA	RING/U-box_superfamily_protein
Glyma.17G125500	2.71	AFC2,AME1,FC2	FUS3-complementing_gene_2
Glyma.02G054800	6.62	APG10,HISN3	Aldolase-type_TIM_barrel_family_protein
Glyma.20G023500	5.72	NA	Cyclin_family_protein
Glyma.05G032200	3.67	NA	Homeodomain-like_superfamily_protein
Glyma.15G035600	6.32	MAR1,TOC75-III	translocon_at_the_outer_envelope_membrane_of_chloroplasts_75-III
Glyma.11G157000	6.62	NA	Eukaryotic_aspartyl_protease_family_protein
Glyma.16G090500	6.32	NA	nuclear_transport_factor_2_(NTF2)_family_protein_/_RNA_recognition_motif_(RRM)-containing_protein
Glyma.06G230400	6.32	TTL1	tetratricopetide-repeat_thioredoxin-like_1
Glyma.11G145700	6.02	NA	Uncharacterised_protein_family_(UPF0497)
Glyma.16G080900	8.73	CHY1	beta-hydroxyisobutyryl-CoA_hydrolase_1
Glyma.12G077300	6.02	NCRK	Protein_kinase_superfamily_protein
Glyma.18G262700	7.18	NA	NAD(P)H_dehydrogenase_subunit_H
Glyma.18G058200	7.22	TAF15b	TBP-associated_factor_15B
Glyma.04G099100	6.92	NA	Mitochondrial_ribosomal_protein_L27
Glyma.07G036600	7.83	NA	Kinase-related_protein_of_unknown_function_(DUF1296)
Glyma.12G174000	7.22	NA	SIT4_phosphatase-associated_family_protein
Glyma.17G257800	8.73	HXK3	hexokinase_3
Glyma.13G284200	9.03	FQR1	flavodoxin-like_quinone_reductase_1
Glyma.20G233300	7.53	NA	seryl-tRNA_synthetase_/_serine--tRNA_ligase
Glyma.10G263000	9.33	44440	stress_enhanced_protein_1
Glyma.11G194300	8.13	NA	lactoylglutathione_lyase_family_protein_/_glyoxalase_I_family_protein
Glyma.08G314800	5.77	ATPAP18,PAP18	purple_acid_phosphatase_18
Glyma.08G148300	6.02	SPK1	guanyl-nucleotide_exchange_factors;GTPase_binding;GTP_binding
Glyma.04G111900	7.53	NA	RNA-binding_KH_domain-containing_protein
Glyma.13G186500	11.44	ZIFL1	zinc_induced_facilitator-like_1
Glyma.11G004100	4.89	ATCHR12	Homeotic_gene_regulator
Glyma.02G050200	6.92	ATVHA-C1,AVA-P1,VHA-C1	ATPase,_F0/V0_complex,_subunit_C_protein
Glyma.20G244900	3.47	ATGSL10,CALS9,gsl10	glucan_synthase-like_10
Glyma.19G226200	7.83	ERMO2,SEC24A	Sec23/Sec24_protein_transport_family_protein
Glyma.20G210300	2.87	ATMGT9,MGT9,MRS2-2	magnesium_transporter_9
Glyma.13G115800	6.62	ATMIN7,BEN1	HOPM_interactor_7
Glyma.09G277700	2.89	NA	NA
Glyma.12G022300	2.89	GABA-T,HER1,POP2	Pyridoxal_phosphate_(PLP)-dependent_transferases_superfamily_protein
Glyma.12G050700	8.43	AtCRT3,CRT3,EBS2,PSL1	calreticulin_3
Glyma.06G054200	7.53	NA	AGC_(cAMP-dependent,_cGMP-dependent_and_protein_kinase_C)_kinase_family_protein
Glyma.09G002700	8.52	NA	indigoidine_synthase_A_family_protein
Glyma.18G297400	10.54	RAD23D	Rad23_UV_excision_repair_protein_family
Glyma.20G223300	8.73	ATCDC5,ATMYBCDC5,CDC5	cell_division_cycle_5
Glyma.14G177300	6.02	NA	O-fucosyltransferase_family_protein
Glyma.18G171100	8.43	LUH	LEUNIG_homolog
Glyma.06G325300	2.72	MTHFR2	methylenetetrahydrofolate_reductase_2
Glyma.01G167500	2.89	GMD2,MUR1,MUR_1	NAD(P)-binding_Rossmann-fold_superfamily_protein
Glyma.18G268600	9.33	NA	HXXXD-type_acyl-transferase_family_protein
Glyma.17G180900	8.13	NA	NA
Glyma.13G166800	2.72	ATSPX2,SPX2	SPX_domain_gene_2
Glyma.09G171000	6.62	EDA7	embryo_sac_development_arrest_7
Glyma.10G108600	5.42	NA	Cyclin-like_family_protein
Glyma.11G106400	12.34	NA	Cyclophilin-like_peptidyl-prolyl_cis-trans_isomerase_family_protein
Glyma.13G192900	8.13	NA	Protein_of_unknown_function_(DUF810)
Glyma.05G014600	4.9	NA	RNI-like_superfamily_protein
Glyma.04G066800	7.22	NA	TPX2_(targeting_protein_for_Xklp2)_protein_family
Glyma.06G003400	8.43	NA	high-affinity_nickel-transport_family_protein
Glyma.02G253000	6.62	NA	RING/FYVE/PHD_zinc_finger_superfamily_protein
Glyma.13G055200	2.89	NA	Proteasome_component_(PCI)_domain_protein
Glyma.05G115200	6.62	NA	Pentatricopeptide_repeat_(PPR)_superfamily_protein
Glyma.13G161600	2.71	ATSPS1F,SPS1F	sucrose_phosphate_synthase_1F
Glyma.05G183500	3.08	44441	stress_enhanced_protein_2
Glyma.18G279800	9.33	TBL19	TRICHOME_BIREFRINGENCE-LIKE_19
Glyma.06G229000	6.57	NA	ATP_synthase_subunit_C_family_protein
Glyma.03G260500	6.62	NA	RNA-binding_(RRM/RBD/RNP_motifs)_family_protein
Glyma.10G200100	11.14	ATPTPKIS1,ATSEX4,DSP4,SEX4	dual_specificity_protein_phosphatase_(DsPTP1)_family_protein
Glyma.07G005500	4.07	NA	NA
Glyma.03G180100	4.28	NA	Transducin/WD40_repeat-like_superfamily_protein
Glyma.13G367300	7.53	TPR1	TOPLESS-related_1
Glyma.06G161300	5.72	INH3	inhibitor-3
Glyma.06G320100	4.9	ATPEX5,PEX5	peroxin_5
Glyma.15G121600	7.22	NA	SMAD/FHA_domain-containing_protein_
Glyma.15G262500	9.03	ATCYSD1,CYSD1	cysteine_synthase_D1
Glyma.15G248200	3.27	UBP15	ubiquitin-specific_protease_15
Glyma.20G188900	2.89	NA	NA
Glyma.12G094500	11.44	LHW	transcription_factor-related
Glyma.13G334200	7.83	NA	RNA-binding_(RRM/RBD/RNP_motifs)_family_protein
Glyma.11G199400	7.83	UBC28	ubiquitin-conjugating_enzyme_28
Glyma.03G252000	5.72	ATVPS52,POK,TTD8	Vps52_/_Sac2_family_
Glyma.16G051500	5.42	NA	NA
Glyma.13G195500	7.53	NA	NA
Glyma.04G057400	9.63	ATDCL3,DCL3	dicer-like_3
Glyma.04G192300	8.43	ATGSL08,ATGSL8,CHOR,GSL08,GSL8	glucan_synthase-like_8
Glyma.19G050500	3.87	BUL1,DWF7,STE1	sterol_1
Glyma.U015000	5.02	NA	Uncharacterised_conserved_protein_UCP022280
Glyma.09G112400	3.08	NA	NA
Glyma.10G249800	3.67	NA	Cyclin_family_protein
Glyma.12G060500	9.03	NA	Peptidase_S24/S26A/S26B/S26C_family_protein
Glyma.17G027200	13.55	ATKINESIN-13A,KINESIN-13A	P-loop_containing_nucleoside_triphosphate_hydrolases_superfamily_protein
Glyma.05G203400	6.02	ATHSD1,HSD1	hydroxysteroid_dehydrogenase_1
Glyma.13G314500	13.85	NA	NA
Glyma.10G102400	10.24	LUH	LEUNIG_homolog
Glyma.09G211000	8.43	NA	early-responsive_to_dehydration_stress_protein_(ERD4)
Glyma.19G178100	24.08	NA	Ribosomal_protein_L4/L1_family
Glyma.13G155700	6.92	NA	Calcineurin-like_metallo-phosphoesterase_superfamily_protein
Glyma.18G299500	8.73	NA	ENTH/VHS_family_protein
Glyma.06G225900	54.35	NA	DNA-directed_RNA_polymerase_family_protein
Glyma.18G034200	8.43	ATDFB,DFB	DHFS-FPGS_homolog_B
Glyma.20G050200	7.53	NA	CCCH-type_zinc_fingerfamily_protein_with_RNA-binding_domain
Glyma.08G069400	14.15	OXP1	oxoprolinase_1
Glyma.20G026800	4.73	NA	Purple_acid_phosphatases_superfamily_protein
Glyma.08G085500	6.32	NA	P-loop_containing_nucleoside_triphosphate_hydrolases_superfamily_protein
Glyma.07G012000	3.47	ATB_BETA	Protein_phosphatase_2A,_regulatory_subunit_PR55
Glyma.18G228200	4.69	ATVIT1,VIT1	vacuolar_iron_transporter_1
Glyma.18G012500	9.03	ORP1D	OSBP(oxysterol_binding_protein)-related_protein_1D
Glyma.18G101700	8.13	NA	NA
Glyma.18G213500	13.25	NA	Transmembrane_proteins_14C
Glyma.08G111000	4.24	BGAL9	beta_galactosidase_9
Glyma.19G213700	7.22	ATNDT1,NDT1	NAD+_transporter_1
Glyma.04G058900	7.53	ATCOL4,COL4	CONSTANS-like_4
Glyma.18G280200	6.02	NA	Protein_kinase_superfamily_protein
Glyma.18G070800	6.62	NA	NA
Glyma.03G137100	4.9	NA	Insulinase_(Peptidase_family_M16)_family_protein
Glyma.17G228100	9.93	ftsh4	FTSH_protease_4
Glyma.19G196300	6.92	ATDCP1,DCP1	decapping_1
Glyma.06G100800	2.71	NA	Mitochondrial_ribosomal_protein_L27
Glyma.19G257600	7.83	NA	NC_domain-containing_protein-related
Glyma.09G203800	5.55	NA	Major_facilitator_superfamily_protein
Glyma.09G200700	5.72	NA	Exostosin_family_protein
Glyma.12G062900	6.32	APK1,APK1A	Protein_kinase_superfamily_protein
Glyma.12G215800	16.86	NA	NAD(P)-binding_Rossmann-fold_superfamily_protein
Glyma.01G150700	7.22	FEI1	Leucine-rich_repeat_protein_kinase_family_protein
Glyma.06G003900	7.22	ADF5,ATADF5	actin_depolymerizing_factor_5
Glyma.16G084800	7.83	ATRPB15.9,NRPB4,RPB15.9,RPB15.9.9	RNA_polymerase_II,_Rpb4,_core_protein
Glyma.11G179000	4.25	LHW	transcription_factor-related
Glyma.17G001900	7.22	NA	nucleic_acid_binding;RNA_binding
Glyma.17G207100	3.27	HTA9	histone_H2A_protein_9
Glyma.09G224300	9.33	NA	PLAC8_family_protein
Glyma.07G056500	6.92	NA	Plant_protein_1589_of_unknown_function
Glyma.05G137100	7.53	ATBPC1,BBR,BPC1	basic_pentacysteine1
Glyma.08G094200	2.71	ZFP4	zinc_finger_protein_4
Glyma.08G279200	4.28	ATNIC1,NIC1	nicotinamidase_1
Glyma.08G028400	3.47	ATISA1,ISA1	isoamylase_1
Glyma.03G177700	9.63	NF-YB8	nuclear_factor_Y,_subunit_B8
Glyma.08G095700	6.92	NA	Protein_of_unknown_function_(DUF3317)
Glyma.16G035500	10.54	UNE7	Core-2/I-branching_beta-1,6-N-acetylglucosaminyltransferase_family_protein
Glyma.08G065100	6.62	HSC70-5,MTHSC70-2	mitochondrial_HSO70_2
Glyma.15G255200	2.71	NA	NA
Glyma.15G035900	14.94	APUM2,PUM2	pumilio_2
Glyma.11G027000	7.83	EMB2778,FKP1,HMGS,MVA1	hydroxymethylglutaryl-CoA_synthase_/_HMG-CoA_synthase_/_3-hydroxy-3-methylglutaryl_coenzyme_A_synthase
Glyma.18G251300	8.13	ARA-5,ARA5,ATRAB1B,ATRABD2A,RA-5,RABD2A	RAS_5
Glyma.06G170200	11.44	NA	NA
Glyma.12G071300	4.07	ATSIZ1,SIZ1	DNA-binding_protein_with_MIZ/SP-RING_zinc_finger,_PHD-finger_and_SAP_domain
Glyma.08G327900	6.02	NA	agenet_domain-containing_protein_/_bromo-adjacent_homology_(BAH)_domain-containing_protein
Glyma.10G065900	6.02	DML1,ROS1	demeter-like_1
Glyma.20G238700	2.71	NA	Protein_phosphatase_2C_family_protein
Glyma.08G014300	6.62	ATECS1,CAD2,GSH1,GSHA,PAD2,RML1	glutamate-cysteine_ligase
Glyma.04G255100	4	NA	Coatomer,_alpha_subunit
Glyma.01G136100	6.02	ATHMG,HMG,NFD,SSRP1	high_mobility_group
Glyma.11G199100	6.62	NA	DEA(D/H)-box_RNA_helicase_family_protein
Glyma.07G198500	9.63	NA	Ribosomal_protein_S5_family_protein
Glyma.13G369800	8.43	ATCCR2,CCR2	cinnamoyl_coa_reductase
Glyma.19G012000	4.48	NA	RNA_ligase/cyclic_nucleotide_phosphodiesterase_family_protein
Glyma.09G234500	9.33	SGR2	shoot_gravitropism_2_(SGR2)
Glyma.03G080200	5.42	NA	NA
Glyma.02G184600	5.72	ATVLN2,VLN2	villin_2
Glyma.18G258600	3.08	NA	RNA-binding_(RRM/RBD/RNP_motifs)_family_protein
Glyma.09G285900	5.12	URH2	uridine-ribohydrolase__2
Glyma.07G195900	6.02	NSF	AAA-type_ATPase_family_protein
Glyma.05G090500	2.71	NA	Transducin/WD40_repeat-like_superfamily_protein
Glyma.14G035400	5.33	NA	Rho_GTPase_activation_protein_(RhoGAP)_with_PH_domain
Glyma.03G227700	6.32	ATMYB61,MYB61	myb_domain_protein_61
Glyma.07G127300	6.02	SNF7.1	SNF7_family_protein
Glyma.16G102400	7.22	NA	Sec14p-like_phosphatidylinositol_transfer_family_protein
Glyma.09G243300	3.03	ARA-5,ARA5,ATRAB1B,ATRABD2A,RA-5,RABD2A	RAS_5
Glyma.17G261600	6.62	NA	Ubiquitin-like_superfamily_protein
Glyma.02G276400	7.22	UREF	urease_accessory_protein_F
Glyma.04G073200	6.92	NA	Protein_of_unknown_function_(DUF581)
Glyma.03G181800	9.63	CHR4,PKR1	chromatin_remodeling_4
Glyma.07G143100	11.42	NA	chaperone_protein_dnaJ-related
Glyma.16G006000	5.99	NA	Kinase-related_protein_of_unknown_function_(DUF1296)
Glyma.13G180900	3.08	NA	RING/U-box_superfamily_protein
Glyma.10G285900	12.04	NA	TCP_family_transcription_factor_
Glyma.18G150000	8.73	SHM1,SHMT1,STM	serine_transhydroxymethyltransferase_1
Glyma.15G163900	9.63	APUM5,PUM5	pumilio_5
Glyma.04G094500	6.62	ATVPS34,PI3K,VPS34	vacuolar_protein_sorting_34
Glyma.14G144700	6.62	AAP8,ATAAP8	amino_acid_permease_8
Glyma.14G121200	6.92	ADH,ADH1,ATADH,ATADH1	alcohol_dehydrogenase_1
Glyma.03G200300	11.14	NA	alpha/beta-Hydrolases_superfamily_protein
Glyma.08G220400	10.54	NA	NA
Glyma.15G222400	13.85	AREB3,DPBF3	ABA-responsive_element_binding_protein_3
Glyma.12G074100	2.89	JK224,NPH1,PHOT1,RPT1	phototropin_1
Glyma.04G033600	3.47	NA	Phospholipid/glycerol_acyltransferase_family_protein
Glyma.13G160000	7.22	NA	BED_zinc_finger_;hAT_family_dimerisation_domain
Glyma.09G019900	6.62	NA	SBP_(S-ribonuclease_binding_protein)_family_protein
Glyma.14G075400	9.63	NA	NA
Glyma.05G096900	5.33	ATRER1A	Rer1_family_protein
Glyma.15G165600	7.53	NA	NA
Glyma.10G201100	5.55	NA	Pyruvate_kinase_family_protein
Glyma.08G336400	7.22	PA200	proteasome_activating_protein_200
Glyma.14G119800	17.16	SEU	SEUSS_transcriptional_co-regulator
Glyma.10G023600	8.05	MBD4	methyl-CPG-binding_domain_4
Glyma.13G222800	8.13	NA	subtilase_family_protein
Glyma.03G169700	6.62	NA	Protein_of_unknown_function_(DUF3741)
Glyma.02G310900	9.93	NA	Patched_family_protein
Glyma.11G091900	10.24	ATDPB,DPB	Transcription_factor_DP
Glyma.02G193700	6.02	NA	NA
Glyma.04G229300	4.9	SRp34a	SER/ARG-rich_protein_34A
Glyma.20G182800	2.89	ATSEC8,SEC8	subunit_of_exocyst_complex_8
Glyma.07G046100	9.03	SEC10	exocyst_complex_component_sec10
Glyma.18G237500	6.02	NA	NA
Glyma.10G266600	2.71	NA	Endosomal_targeting_BRO1-like_domain-containing_protein
Glyma.16G105300	9.71	NA	S-adenosyl-L-methionine-dependent_methyltransferases_superfamily_protein
Glyma.09G212100	4.48	EDR2	ENHANCED_DISEASE_RESISTANCE_2
Glyma.20G246100	7.22	ATUTR6,UTR6	UDP-galactose_transporter_6
Glyma.12G190700	8.13	FLA17	FASCICLIN-like_arabinogalactan_protein_17_precursor
Glyma.13G294500	7.58	ATCBP20,CBP20	CAP-binding_protein_20
Glyma.01G087800	6.62	GATL3	galacturonosyltransferase-like_3
Glyma.17G073500	6.62	ATCNGC5,CNGC5	cyclic_nucleotide_gated_channel_5
Glyma.08G187500	5.12	EBS1,PSL2,UGGT	UDP-glucose:glycoprotein_glucosyltransferases;transferases,_transferring_hexosyl_groups;transferases,_transferring_glycosyl_groups
Glyma.09G057800	6.62	APUM5,PUM5	pumilio_5
Glyma.17G032500	7.53	NA	zinc_knuckle_(CCHC-type)_family_protein
Glyma.20G209000	6.62	NA	S-adenosyl-L-methionine-dependent_methyltransferases_superfamily_protein
Glyma.06G213100	5.42	RGA,RGA1	GRAS_family_transcription_factor_family_protein
Glyma.04G018100	7.53	NA	NA
Glyma.02G293600	5.72	CNX5,SIR1	co-factor_for_nitrate,_reductase_and_xanthine_dehydrogenase_5
Glyma.17G231600	9.93	ELF3,PYK20	hydroxyproline-rich_glycoprotein_family_protein
Glyma.10G017500	6.62	NA	Protein_of_unknown_function,_DUF538
Glyma.15G010000	6.32	NA	Nucleoporin_interacting_component_(Nup93/Nic96-like)_family_protein
Glyma.18G211200	6.92	NA	NA
Glyma.04G157200	5.72	ATCNGC17,CNGC17	cyclic_nucleotide-gated_channel_17
Glyma.11G098800	4.07	NA	Peptidyl-tRNA_hydrolase_II_(PTH2)_family_protein
Glyma.09G280000	4.28	NA	NA
Glyma.03G111200	6.02	NA	Protein_kinase_superfamily_protein
Glyma.09G077600	5.42	NA	Ribosomal_L18p/L5e_family_protein
Glyma.19G018100	6.02	NA	Oxoglutarate/iron-dependent_oxygenase
Glyma.16G221700	6.02	NA	hydrolases,_acting_on_acid_anhydrides,_in_phosphorus-containing_anhydrides;ATP-dependent_helicases;nucleic_acid_binding;ATP_binding;RNA_binding;helicases
Glyma.08G205900	11.44	NA	NA
Glyma.03G129900	7.22	NA	Plant_protein_1589_of_unknown_function
Glyma.07G046000	2.71	ATPME3,PME3	pectin_methylesterase_3
Glyma.15G184100	6.92	NA	Plant_invertase/pectin_methylesterase_inhibitor_superfamily
Glyma.15G212200	10.54	NA	NA
Glyma.18G200800	5.12	NA	LMBR1-like_membrane_protein
Glyma.10G173300	4.48	NA	UBX_domain-containing_protein
Glyma.09G146200	12.94	SLK2	SEUSS-like_2
Glyma.02G268700	3.03	NA	NA
Glyma.09G181300	3.67	NA	Protein_of_unknown_function_(DUF789)
Glyma.04G240900	6.92	GTA02,GTA2	global_transcription_factor_group_A2
Glyma.03G122400	14.45	ATUBP5,PDE323,UBP5	ubiquitin-specific_protease_5
Glyma.19G120800	7.35	NA	ribosomal_protein_L2
Glyma.08G199800	5.72	PFK3	phosphofructokinase_3
Glyma.08G362600	7.22	NA	Got1/Sft2-like_vescicle_transport_protein_family
Glyma.05G006700	5.12	NA	Protein_kinase_superfamily_protein
Glyma.02G124500	6.92	AtHsp90.5,CR88,EMB1956,Hsp88.1,HSP90.5	Chaperone_protein_htpG_family_protein
Glyma.12G045800	8.13	NA	transducin_family_protein_/_WD-40_repeat_family_protein
Glyma.18G268500	7.53	NA	HXXXD-type_acyl-transferase_family_protein
Glyma.20G166300	6.89	NA	ubiquitin_interaction_motif-containing_protein
Glyma.05G140400	4.48	RGA,RGA1	GRAS_family_transcription_factor_family_protein
Glyma.18G034300	19.27	P5CS2	delta_1-pyrroline-5-carboxylate_synthase_2
Glyma.19G095300	3.27	AT-TCP20,ATTCP20,PCF1,TCP20	TEOSINTE_BRANCHED_1,_cycloidea,_PCF_(TCP)-domain_family_protein_20
Glyma.20G088600	10.24	bHLH104	basic_helix-loop-helix_(bHLH)_DNA-binding_superfamily_protein
Glyma.06G142300	11.74	ARR17,RR17	response_regulator_17
Glyma.06G188000	15.05	5-FCL	5-formyltetrahydrofolate_cycloligase
Glyma.20G082000	10.54	NA	NA
Glyma.04G147600	3.27	ATSPX2,SPX2	SPX_domain_gene_2
Glyma.12G073900	7.83	APRR7,PRR7	pseudo-response_regulator_7
Glyma.01G162900	6.62	NA	RING/U-box_superfamily_protein
Glyma.07G021400	12.04	NA	NA
Glyma.02G025000	3.08	NA	Galactosyltransferase_family_protein
Glyma.06G050400	8.13	NA	Protein_of_Unknown_Function_(DUF239)
Glyma.06G222100	3.87	NA	Protein_of_unknown_function_(DUF3414)
Glyma.05G123500	3.27	CDC2,CDC2A,CDC2AAT,CDK2,CDKA1,CDKA;1	cell_division_control_2
Glyma.13G265200	6.32	NA	Protein_of_unknown_function_DUF92,_transmembrane
Glyma.07G034300	6.92	EMB2753	tetratricopeptide_repeat_(TPR)-containing_protein
Glyma.14G025800	6.97	ATGPT1,GPT1	glucose_6-phosphate/phosphate_translocator_1
Glyma.10G191200	6.32	NA	Haloacid_dehalogenase-like_hydrolase_(HAD)_superfamily_protein
Glyma.13G334800	3.8	ATUBC7,UBC7	ubiquitin_carrier_protein_7
Glyma.07G084700	6.62	COV1	Protein_of_unknown_function_(DUF502)
Glyma.17G220500	4.28	AIP2	RING/U-box_superfamily_protein
Glyma.12G043900	5.77	AGB1,ATAGB1,ELK4	GTP_binding_protein_beta_1
Glyma.15G098200	2.71	AtTLP3,TLP3	tubby_like_protein_3
Glyma.07G210600	8.13	CRK	CDPK-related_kinase
Glyma.13G216100	2.71	NA	Protein_kinase_superfamily_protein
Glyma.17G193800	4.48	NA	NA
Glyma.02G250400	7.22	NA	S-adenosyl-L-methionine-dependent_methyltransferases_superfamily_protein
Glyma.13G350800	6.92	NA	NA
Glyma.19G077100	3.27	NA	Mitochondrial_ribosomal_protein_L37
Glyma.08G042600	6.92	PDLP6	plasmodesmata-located_protein_6
Glyma.07G099900	7.53	NA	MATE_efflux_family_protein
Glyma.17G191000	6.92	NA	ENTH/VHS/GAT_family_protein
Glyma.03G167100	9.03	NA	Nuclear_transport_factor_2_(NTF2)_family_protein_with_RNA_binding_(RRM-RBD-RNP_motifs)_domain
Glyma.04G113700	5.42	WIP1	WPP_domain_interacting_protein_1
Glyma.17G175500	8.13	NA	AP2/B3-like_transcriptional_factor_family_protein
Glyma.02G015700	9.03	FUM1	fumarase_1
Glyma.10G144800	3.08	NA	Peptidase_C15,_pyroglutamyl_peptidase_I-like
Glyma.06G046300	2.89	ATSAT32,SAT32	interferon-related_developmental_regulator_family_protein_/_IFRD_protein_family
Glyma.09G032800	3.67	NA	Chaperone_DnaJ-domain_superfamily_protein
Glyma.13G126600	11.74	SDG18,SUVR2	SET-domain_containing_protein_lysine_methyltransferase_family_protein
Glyma.12G167700	8.73	ATCNFU2,NFU2	NIFU-like_protein_2
Glyma.14G060000	7.53	NA	Yippee_family_putative_zinc-binding_protein
Glyma.06G177900	9.33	NA	NA
Glyma.02G133500	6.92	NQR	ARP_protein_(REF)
Glyma.13G138100	8.73	NA	NA
Glyma.09G213200	3.47	NA	NA
Glyma.20G176900	6.62	NA	alpha/beta-Hydrolases_superfamily_protein
Glyma.07G270600	7.22	ATGH9A1,DEC,GH9A1,IRX2,KOR,KOR1,RSW2,TSD1	glycosyl_hydrolase_9A1
Glyma.20G202100	8.13	NA	TRAF-like_superfamily_protein
Glyma.08G150000	9.03	NA	Protein_kinase_superfamily_protein
Glyma.11G081500	6.02	ATPLDDELTA,PLDDELTA	phospholipase_D_delta
Glyma.17G136200	6.62	AHL1,ATAHL1	AT-hook_motif_nuclear-localized_protein_1
Glyma.14G053500	6.32	NA	NA
Glyma.12G058900	92.72	ATRAB-A2B,ATRABA2B,RAB-A2B,RABA2b	RAB_GTPase_homolog_A2B
Glyma.04G133800	2.71	AtHPR1,AtTHO1,HPR1,THO1	nuclear_matrix_protein-related
Glyma.04G077700	7.83	NA	NA
Glyma.07G233200	5.42	NA	S-adenosyl-L-methionine-dependent_methyltransferases_superfamily_protein
Glyma.04G074900	7.83	NA	NA
Glyma.08G326800	6.62	NA	NA
Glyma.03G128300	5.77	FD-GOGAT,GLS1,GLU1,GLUS	glutamate_synthase_1
Glyma.02G276700	11.74	RHC1A	RING-H2_finger_C1A
Glyma.17G002100	6.32	EMB1879,RUS6	Protein_of_unknown_function,_DUF647
Glyma.14G095400	7.53	NA	Fatty_acid/sphingolipid_desaturase
Glyma.04G236800	6.92	ATO	splicing_factor-related
Glyma.03G055900	14.75	ATAMPD,FAC1	AMP_deaminase,_putative_/_myoadenylate_deaminase,_putative
Glyma.10G094000	3.47	NA	Transmembrane_amino_acid_transporter_family_protein
Glyma.06G175700	6.62	RGLG2	RING_domain_ligase2
Glyma.16G122200	3.03	NA	Protein_phosphatase_2C_family_protein
Glyma.04G122400	6.32	NA	DCD_(Development_and_Cell_Death)_domain_protein
Glyma.12G119800	4.07	NA	MAK16_protein-related
Glyma.06G187500	6.92	NA	ARM_repeat_superfamily_protein
Glyma.12G212400	6.02	ARA-2,ARA2,ATRAB11E,ATRABA1A	Ras-related_small_GTP-binding_family_protein
Glyma.05G148600	8.13	NA	NA
Glyma.20G075100	8.19	U2Aprime	U2_small_nuclear_ribonucleoprotein_A
Glyma.07G061000	6.92	ATPOB1,POB1	POZ/BTB_containin_G-protein_1
Glyma.15G202000	3.35	NA	Protein_kinase_superfamily_protein_with_octicosapeptide/Phox/Bem1p_domain
Glyma.02G004400	2.89	NA	Tetratricopeptide_repeat_(TPR)-like_superfamily_protein
Glyma.01G143100	6.16	AHL1,ATAHL1	AT-hook_motif_nuclear-localized_protein_1
Glyma.13G040600	9.03	NA	myosin_heavy_chain-related
Glyma.18G237800	6.02	AN	NAD(P)-binding_Rossmann-fold_superfamily_protein
Glyma.11G059700	9.03	NA	hydroxyproline-rich_glycoprotein_family_protein
Glyma.18G132900	2.71	NA	NA
Glyma.02G005000	6.62	NA	NA
Glyma.10G210700	5.72	NA	phosphoglucosamine_mutase_family_protein
Glyma.12G162800	6.92	NA	Yippee_family_putative_zinc-binding_protein
Glyma.20G192200	3.47	NA	lactate/malate_dehydrogenase_family_protein
Glyma.04G119600	6.02	SKS1	SKU5_similar_1
Glyma.02G095200	7.53	ATHEX2,HEXO1	beta-hexosaminidase_1
Glyma.03G122300	7.83	CYP94D2	cytochrome_P450,_family_94,_subfamily_D,_polypeptide_2
Glyma.05G003500	3.27	EMB3012	embryo_defective_3012
Glyma.07G025200	10.54	atgos11,GOS11	golgi_snare_11
Glyma.11G221100	6.32	PUR4	purine_biosynthesis_4
Glyma.18G288000	13.41	ATWOX13,HB-4,WOX13	WUSCHEL_related_homeobox_13
Glyma.06G082600	6.32	NA	NA
Glyma.03G229000	8.13	ERMO2,SEC24A	Sec23/Sec24_protein_transport_family_protein
Glyma.08G221800	11.74	GATA28,TIFY2A,ZML2	ZIM-LIKE_2
Glyma.18G301600	8.13	NA	hydroxyproline-rich_glycoprotein_family_protein
Glyma.08G046500	3.08	ADO3,FKF1	flavin-binding,_kelch_repeat,_f_box_1
Glyma.04G156300	5.72	NA	NA
Glyma.07G062200	13.85	ABIL1	ABI-1-like_1
Glyma.14G051400	8.01	NA	lipid-binding_serum_glycoprotein_family_protein
Glyma.10G027800	8.73	NA	NA
Glyma.01G224300	6.32	NA	crooked_neck_protein,_putative_/_cell_cycle_protein,_putative
Glyma.20G040600	3.87	NPC2	non-specific_phospholipase_C2
Glyma.07G101700	5.42	NA	NA
Glyma.07G077100	9.33	ATFUS6,ATSK31,COP11,CSN1,EMB78,FUS6,SK31	26S_proteasome,_regulatory_subunit_Rpn7;Proteasome_component_(PCI)_domain
Glyma.19G052300	4.48	ATGB2,ATRAB2C,ATRABB1B,GB2	GTP-binding_2
Glyma.08G267900	2.71	NA	UBX_domain-containing_protein
Glyma.10G215400	3.27	EMB3003	2-oxoacid_dehydrogenases_acyltransferase_family_protein
Glyma.02G207700	4.89	NA	Protein_of_unknown_function_(DUF788)
Glyma.07G222900	2.89	NA	ZPR1_zinc-finger_domain_protein
Glyma.13G347800	2.9	ATLOX1,LOX1	lipoxygenase_1
Glyma.07G267800	5.42	ATOPT3,OPT3	oligopeptide_transporter
Glyma.14G092800	7.83	GAMMA-VPE,GAMMAVPE	gamma_vacuolar_processing_enzyme
Glyma.05G231700	2.71	NA	FRIGIDA-like_protein
Glyma.20G053500	14.75	FRS3	FAR1-related_sequence_3
Glyma.12G117500	2.89	NA	NA
Glyma.02G252700	3.08	NA	NA
Glyma.03G251500	2.71	TOPP4	type_one_serine/threonine_protein_phosphatase_4
Glyma.09G002400	8.73	NA	Protein_kinase_family_protein_with_ARM_repeat_domain
Glyma.13G326900	6.32	ATSNAK1,GRIK2	geminivirus_rep_interacting_kinase_2
Glyma.17G148200	4.07	NA	tRNA/rRNA_methyltransferase_(SpoU)_family_protein
Glyma.01G070400	3.27	NA	transferases;folic_acid_binding
Glyma.08G221900	6.02	MANIB,MNS1	alpha-mannosidase_1
Glyma.15G005500	3.87	NA	NA
Glyma.05G118600	9.63	NA	Polymerase/histidinol_phosphatase-like
Glyma.10G101200	6.78	NA	S-adenosyl-L-methionine-dependent_methyltransferases_superfamily_protein
Glyma.U020600	5.33	ATRNL,RNL	RNAligase
Glyma.07G271300	7.22	NA	GTP_binding;GTP_binding
Glyma.01G126000	6.02	NA	Tautomerase/MIF_superfamily_protein
Glyma.08G283400	2.89	HAP13	Clathrin_adaptor_complexes_medium_subunit_family_protein
Glyma.12G189900	6.02	IQD5	IQ-domain_5
Glyma.13G112200	4.29	NA	Protein_of_unknown_function_(DUF581)
Glyma.19G145500	5.72	NA	Tubulin_binding_cofactor_C_domain-containing_protein
Glyma.07G126400	6.92	PFK3	phosphofructokinase_3
Glyma.06G055100	8.13	NA	Nitrilase/cyanide_hydratase_and_apolipoprotein_N-acyltransferase_family_protein
Glyma.02G169700	6.62	NA	DNAse_I-like_superfamily_protein
Glyma.15G111700	7.83	NA	Ribosomal_protein_L4/L1_family
Glyma.05G139000	6.02	ZFP4	zinc_finger_protein_4
Glyma.09G213800	7.22	CLPP4,NCLPP4	CLP_protease_P4
Glyma.03G233400	5.72	TPR3	TOPLESS-related_3
Glyma.10G207500	2.71	GEM1,MOR1	ARM_repeat_superfamily_protein
Glyma.08G360000	8.43	NA	NA
Glyma.07G069900	9.33	ATSPPL4,SPPL4	SIGNAL_PEPTIDE_PEPTIDASE-LIKE_4
Glyma.01G011200	2.71	XLG3	extra-large_GTP-binding_protein_3
Glyma.06G127500	4.07	ATO	splicing_factor-related
Glyma.08G219900	4.65	NA	NA
Glyma.02G074200	8.73	ATGR1,GR1	glutathione-disulfide_reductase
Glyma.11G048200	7.22	ATVDAC2,VDAC2	voltage_dependent_anion_channel_2
Glyma.03G076600	3.27	NA	Cysteine_proteinases_superfamily_protein
Glyma.11G138700	8.13	TRFL2	TRF-like_2
Glyma.19G201500	6.62	NA	TPX2_(targeting_protein_for_Xklp2)_protein_family
Glyma.04G116700	5.99	ATPEX5,PEX5	peroxin_5
Glyma.16G199400	18.06	PEPKR1	phosphoenolpyruvate_carboxylase-related_kinase_1
Glyma.18G202100	6.32	CPK13	calcium-dependent_protein_kinase_13
Glyma.05G154200	18.56	NA	ubiquitin-associated_(UBA)/TS-N_domain-containing_protein
Glyma.17G023400	7.22	NA	CHY-type/CTCHY-type/RING-type_Zinc_finger_protein
Glyma.03G263500	8.43	NA	Eukaryotic_translation_initiation_factor_2B_(eIF-2B)_family_protein
Glyma.05G228700	11.44	ckl3	casein_kinase_I-like_3
Glyma.17G167900	4.95	SDN3	small_RNA_degrading_nuclease_3
Glyma.16G198300	9.63	SLK2	SEUSS-like_2
Glyma.14G202400	4.69	NA	Exostosin_family_protein
Glyma.13G137300	2.71	NA	alpha/beta-Hydrolases_superfamily_protein
Glyma.U034000	3.67	NRPC1	nuclear_RNA_polymerase_C1
Glyma.06G018400	6.62	NA	NA
Glyma.08G051900	6.02	NA	transducin_family_protein_/_WD-40_repeat_family_protein
Glyma.01G183500	5.12	SNRK2-3,SNRK2.3,SRK2I	sucrose_nonfermenting_1(SNF1)-related_protein_kinase_2.3
Glyma.09G242200	7.81	ARABIDILLO-1	ARABIDILLO-1
Glyma.03G102900	11.14	NAD-ME1	NAD-dependent_malic_enzyme_1
Glyma.10G209000	6.02	APUM4,PUM4	pumilio_4
Glyma.17G028100	7.53	NA	Fumarylacetoacetate_(FAA)_hydrolase_family
Glyma.16G049600	6.92	ABH1,ATCBP80,CBP80,ENS	ARM_repeat_superfamily_protein
Glyma.10G001100	3.87	NA	acylaminoacyl-peptidase-related
Glyma.16G003600	3.87	NA	Protein_of_unknown_function_(DUF1682)
Glyma.08G007100	2.71	NA	NA
Glyma.19G204000	5.12	ATRBL15,RBL15	RHOMBOID-like_protein_15
Glyma.07G088500	3.08	NIG	NSP_(nuclear_shuttle_protein)-interacting_GTPase
Glyma.07G136500	8.13	NA	Regulator_of_chromosome_condensation_(RCC1)_family_protein
Glyma.06G108200	3.91	ATVPS9A,VPS9,VPS9A	Vacuolar_sorting_protein_9_(VPS9)_domain
Glyma.11G074900	6.62	NA	B-box_type_zinc_finger_family_protein
Glyma.14G018200	10.24	NA	hydroxyproline-rich_glycoprotein_family_protein
Glyma.01G161600	6.62	NA	ACT-like_protein_tyrosine_kinase_family_protein
Glyma.13G117200	2.89	BSH,CHE1	transcription_regulatory_protein_SNF5,_putative_(BSH)
Glyma.18G238500	3.67	NA	Diacylglycerol_kinase_family_protein
Glyma.20G194500	9.93	VPS60.1	SNF7_family_protein
Glyma.10G111100	2.89	NA	NA
Glyma.01G232300	6.66	NA	RNA-binding_(RRM/RBD/RNP_motifs)_family_protein
Glyma.01G234700	6.62	NA	Polyketide_cyclase/dehydrase_and_lipid_transport_superfamily_protein
Glyma.16G077600	6.62	NA	Translation_elongation__factor_EF1B/ribosomal_protein_S6_family_protein
Glyma.04G101100	7.53	APRL4,ATAPRL4	APR-like_4
Glyma.15G140900	4.48	ALDH22A1	aldehyde_dehydrogenase_22A1
Glyma.13G076800	2.89	AtEIN3,EIN3	Ethylene_insensitive_3_family_protein
Glyma.10G212700	8.13	NA	NA
Glyma.03G056500	9.03	SELT	SELT-like_protein_precursor
Glyma.13G164300	7.83	NA	serine-rich_protein-related
Glyma.04G188000	3.27	PIRL9	plant_intracellular_ras_group-related_LRR_9
Glyma.01G061500	7.87	SIK1	Protein_kinase_superfamily_protein
Glyma.03G263200	8.73	APUM23,PUM23	pumilio_23
Glyma.06G081500	7.83	NA	P-loop_containing_nucleoside_triphosphate_hydrolases_superfamily_protein
Glyma.07G212300	6.02	NA	Vacuolar_import/degradation,_Vid27-related_protein
Glyma.18G149700	6.66	NA	UDP-Glycosyltransferase_superfamily_protein
Glyma.03G190900	5.72	NA	NA
Glyma.02G271900	7.22	SMC3,TTN7	Structural_maintenance_of_chromosomes_(SMC)_family_protein
Glyma.06G202500	4.9	NA	U5_small_nuclear_ribonucleoprotein_helicase
Glyma.13G305400	3.08	NA	proline-rich_family_protein
Glyma.07G028200	53.58	NA	CemA-like_proton_extrusion_protein-related
Glyma.14G049700	3.87	ATCOP1,COP1,DET340,EMB168,FUS1	Transducin/WD40_repeat-like_superfamily_protein
Glyma.14G011000	5.72	UKL4	uridine_kinase-like_4
Glyma.11G013900	2.89	NA	KH_domain-containing_protein
Glyma.02G021400	8.73	ATHIR1,HIR1	SPFH/Band_7/PHB_domain-containing_membrane-associated_protein_family
Glyma.09G212800	3.08	BRX,NLM9	DZC_(Disease_resistance/zinc_finger/chromosome_condensation-like_region)_domain_containing_protein
Glyma.10G073300	6.62	NA	Ubiquitin_C-terminal_hydrolases_superfamily_protein
Glyma.01G067600	2.71	ATSTP1,STP1	sugar_transporter_1
Glyma.02G057000	8.13	NA	Putative_methyltransferase_family_protein
Glyma.03G036800	8.73	ATTBP2,TBP2	TATA_binding_protein_2
Glyma.01G079500	4.14	ATHAM3,HAM3	GRAS_family_transcription_factor
Glyma.13G123800	6.32	NA	Peptidase_S24/S26A/S26B/S26C_family_protein
Glyma.01G196300	6.02	ATBCAT-3,BCAT3	branched-chain_aminotransferase_3
Glyma.15G250800	2.71	NA	Aldolase-type_TIM_barrel_family_protein
Glyma.04G225900	6.92	NA	NA
Glyma.11G080100	9.33	NA	winged-helix_DNA-binding_transcription_factor_family_protein
Glyma.15G210300	8.43	ATRHM1,RHM1,ROL1	rhamnose_biosynthesis_1
Glyma.17G164600	7.22	SRFR1	Tetratricopeptide_repeat_(TPR)-like_superfamily_protein
Glyma.19G016300	7.53	SNL2	SIN3-like_2
Glyma.01G068000	8.43	AtHsp90.5,CR88,EMB1956,Hsp88.1,HSP90.5	Chaperone_protein_htpG_family_protein
Glyma.13G193700	11.91	BZIP45,TGA6	TGACG_motif-binding_factor_6
Glyma.18G211400	9.93	KAS_III	3-ketoacyl-acyl_carrier_protein_synthase_III
Glyma.08G023900	4.07	NA	FtsH_extracellular_protease_family
Glyma.04G219500	4.9	DPE1	disproportionating_enzyme
Glyma.20G143800	6.62	CYCT1;4	Cyclin_family_protein
Glyma.06G314900	5.42	SE	C2H2_zinc-finger_protein_SERRATE_(SE)
Glyma.02G307400	9.93	NA	NA
Glyma.03G199500	7.53	NA	NA
Glyma.17G094100	6.62	NA	ARM_repeat_superfamily_protein
Glyma.06G192800	5.42	NA	NA
Glyma.07G062100	12.64	NA	glycosyl_transferase_family_1_protein
Glyma.02G276800	6.02	NA	Ubiquitin-associated/translation_elongation_factor_EF1B_protein
Glyma.18G173200	6.62	NA	Galactose_oxidase/kelch_repeat_superfamily_protein
Glyma.07G204400	6.02	NA	Nucleotide-diphospho-sugar_transferases_superfamily_protein
Glyma.04G062500	7.22	ARR12,RR12	response_regulator_12
Glyma.19G139800	5.72	NA	Insulinase_(Peptidase_family_M16)_family_protein
Glyma.10G188600	9.33	NA	TRAF-like_superfamily_protein
Glyma.05G135800	3.27	NA	CCCH-type_zinc_finger_family_protein
Glyma.05G101700	7.53	ATNRAMP3,NRAMP3	natural_resistance-associated_macrophage_protein_3
Glyma.19G260600	2.89	PSAP,PSI-P,PTAC8,TMP14	photosystem_I_P_subunit
Glyma.08G016400	8.13	ATXPB1,XPB1	homolog_of_xeroderma_pigmentosum_complementation_group_B_1
Glyma.04G046700	3.27	ATECA3,ECA3	endoplasmic_reticulum-type_calcium-transporting_ATPase_3
Glyma.08G133700	9.93	NA	S-adenosyl-L-methionine-dependent_methyltransferases_superfamily_protein
Glyma.09G007300	6.66	NA	Ribosomal_protein_L4/L1_family
Glyma.14G147800	5.42	NA	emp24/gp25L/p24_family/GOLD_family_protein
Glyma.20G105000	8.13	NA	F-box/RNI-like_superfamily_protein
Glyma.18G166700	5.42	NA	B-cell_receptor-associated_protein_31-like_
Glyma.11G032200	6.32	NA	Eukaryotic_aspartyl_protease_family_protein
Glyma.01G113000	7.22	SQD2	sulfoquinovosyldiacylglycerol_2
Glyma.06G266500	6.62	ATK3,KATC	kinesin_3
Glyma.11G156500	7.22	TRX_P,TRX_z	Thioredoxin_z
Glyma.06G141500	14.75	NA	Nucleic_acid-binding,_OB-fold-like_protein
Glyma.10G032100	3.08	ATGR2,EMB2360,GR	glutathione_reductase
Glyma.15G112300	9.63	NA	Phosphofructokinase_family_protein
Glyma.11G004300	5.72	ARIA	ARM_repeat_protein_interacting_with__ABF2
Glyma.08G282800	6.92	NA	Copper_amine_oxidase_family_protein
Glyma.08G197100	6.92	IAR3,JR3	peptidase_M20/M25/M40_family_protein
Glyma.13G062200	2.71	NA	RNA-binding_KH_domain-containing_protein
Glyma.06G263200	7.53	NA	RNA-binding_(RRM/RBD/RNP_motifs)_family_protein
Glyma.05G075600	5.72	NA	Mitochondrial_transcription_termination_factor_family_protein
Glyma.15G086500	10.24	NA	Eukaryotic_protein_of_unknown_function_(DUF872)
Glyma.18G243300	8.73	NA	glutamine-fructose-6-phosphate_transaminase_(isomerizing)s;sugar_binding;transaminases
Glyma.14G129600	5.72	NA	Enhancer_of_polycomb-like_transcription_factor_protein
Glyma.11G124000	6.32	NA	AP2/B3-like_transcriptional_factor_family_protein
Glyma.20G179100	3.47	ATATH8	Protein_kinase_superfamily_protein
Glyma.18G166800	7.53	RIN4	RPM1_interacting_protein_4
Glyma.11G002700	8.13	NA	NA
Glyma.15G035200	7.22	NA	myosin_heavy_chain-related
Glyma.20G084200	40.64	NA	NAD(P)H_dehydrogenase_subunit_H
Glyma.04G162100	9.93	AFP3	ABI_five_binding_protein_3
Glyma.11G002600	2.71	TOR	target_of_rapamycin
Glyma.12G242300	6.92	ADL3,CF1,DL3,DRP2B	dynamin-like_3
Glyma.15G157500	19.35	ATCCT1,CCT1	phosphorylcholine_cytidylyltransferase
Glyma.11G024900	7.83	NA	Fcf2_pre-rRNA_processing_protein
Glyma.02G311300	13.25	NA	Calcium-binding_EF_hand_family_protein
Glyma.01G102400	6.92	NA	Uncharacterised_protein_family_(UPF0497)
Glyma.20G208500	3.08	NA	Calcium-binding_EF-hand_family_protein
Glyma.04G021900	6.62	NA	winged-helix_DNA-binding_transcription_factor_family_protein
Glyma.06G213000	5.42	NA	NA
Glyma.18G143100	9.03	HAP13	Clathrin_adaptor_complexes_medium_subunit_family_protein
Glyma.01G075400	6.02	NA	Translation_elongation_factor_EFG/EF2_protein
Glyma.19G032900	9.03	NA	PLC-like_phosphodiesterases_superfamily_protein
Glyma.17G120500	6.89	GRV2,KAM2	DNAJ_heat_shock_N-terminal_domain-containing_protein
Glyma.18G266700	6.02	scpl25	serine_carboxypeptidase-like_25
Glyma.18G133800	5.99	NA	RNA-processing,_Lsm_domain
Glyma.06G073900	13.55	ATSYP32,SYP32	syntaxin_of_plants__32
Glyma.07G073500	3.11	NA	NA
Glyma.19G045500	5.77	ATRPAC14,ATRPC14,RPC14	RNApolymerase_14_kDa_subunit
Glyma.08G052100	5.33	NA	NA
Glyma.05G029200	7.83	ALDH12A1,ATP5CDH,P5CDH	aldehyde_dehydrogenase_12A1
Glyma.08G158600	6.32	NA	Major_facilitator_superfamily_protein
Glyma.07G130300	6.62	ATMBD2,MBD02,MBD2	methyl-CPG-binding_domain_protein_02
Glyma.08G113500	26.18	NA	transferases;nucleotidyltransferases
Glyma.08G234600	7.22	NA	LEM3_(ligand-effect_modulator_3)_family_protein_/_CDC50_family_protein
Glyma.18G183600	10.84	FHY1,FRY1,PAT3	far-red_elongated_hypocotyl_1
Glyma.10G024500	4.28	NA	Tudor/PWWP/MBT_domain-containing_protein
Glyma.09G002100	9.93	ADL3,CF1,DL3,DRP2B	dynamin-like_3
Glyma.03G014600	6.62	NAD-ME2	NAD-dependent_malic_enzyme_2
Glyma.12G240900	9.33	ATIPK2BETA,IPK2B,IPK2BETA	inositol_polyphosphate_kinase_2_beta
Glyma.13G282700	7.22	NA	Met-10+_like_family_protein
Glyma.17G090600	11.44	NA	Protein_kinase_superfamily_protein
Glyma.05G148300	7.22	NA	Calmodulin-binding_transcription_activator_protein_with_CG-1_and_Ankyrin_domains
Glyma.03G051600	4.69	ATBAG4,BAG4	BCL-2-associated_athanogene_4
Glyma.10G262300	10.24	NA	UNC-50_family_protein
Glyma.05G126000	6.92	ATFAH1,FAH1	fatty_acid_hydroxylase_1
Glyma.14G210500	6.62	ATEXP13,ATEXPA13,ATHEXP_ALPHA_1.22,EXP13,EXPA13	expansin_A13
Glyma.13G010500	12.41	NA	Rubisco_methyltransferase_family_protein
Glyma.05G151100	5.42	AK-HSDH,AK-HSDH_II	aspartate_kinase-homoserine_dehydrogenase_ii
Glyma.20G167800	11.14	NA	Sphingomyelin_synthetase_family_protein
Glyma.06G254900	6.92	ATDGK5,DGK5	diacylglycerol_kinase_5
Glyma.09G017200	4.07	NA	Zinc_finger_(C3HC4-type_RING_finger)_family_protein
Glyma.02G206900	7.22	NA	Transducin/WD40_repeat-like_superfamily_protein
Glyma.02G231800	2.71	SNX2b	sorting_nexin_2B
Glyma.13G219900	6.62	TCP2	TEOSINTE_BRANCHED_1,_cycloidea_and_PCF_transcription_factor_2
Glyma.05G021400	9.03	ATHDA5,HDA05,HDA5	histone_deacetylase_5
Glyma.06G102100	11.74	EXO	Phosphate-responsive_1_family_protein
Glyma.09G166500	5.72	NA	NA
Glyma.05G112400	7.53	ATEYA,EYA	EYES_ABSENT_homolog
Glyma.03G253000	7.22	ATSRA1,KLK,PIR,PIR121,PIRP,SRA1	transcription_activators
Glyma.13G137700	12.34	IMPA-9	importin_alpha_isoform_9
Glyma.16G129200	5.42	NA	NA
Glyma.17G131300	7.53	NA	arginase
Glyma.06G158000	5.72	AtFAAH,FAAH	fatty_acid_amide_hydrolase
Glyma.01G216400	14.45	NA	NA
Glyma.05G048800	9.03	NA	Zinc_finger,_C3HC4_type_(RING_finger)_family_protein
Glyma.14G092600	9.23	NA	Protein_of_unknown_function_(DUF1639)
Glyma.08G324000	5.77	NA	SWIB_complex_BAF60b_domain-containing_protein
Glyma.15G219100	7.22	AtMC4,MC4	metacaspase_4
Glyma.10G170200	8.13	PEL1	Eukaryotic_release_factor_1_(eRF1)_family_protein
Glyma.13G031300	12.04	ATSWI3C,CHB4,SWI3C	SWITCH/sucrose_nonfermenting_3C
Glyma.18G230100	2.83	ATKEA2,KEA2	K+_efflux_antiporter_2
Glyma.03G076800	7.22	NA	mRNA_capping_enzyme_family_protein
Glyma.20G107700	9.03	NA	GCIP-interacting_family_protein
Glyma.11G253900	16.86	XTH16	xyloglucan_endotransglucosylase/hydrolase_16
Glyma.02G104200	8.13	CDCP2,LEJ2	Cystathionine_beta-synthase_(CBS)_family_protein
Glyma.03G073400	5.42	NA	NA
Glyma.18G267100	7.53	NA	glycosyl_hydrolase_family_81_protein
Glyma.U018000	11.14	AGL15	AGAMOUS-like_15
Glyma.05G031300	4.07	NA	DDT_domain_superfamily
Glyma.09G143000	6.62	NA	NA
Glyma.11G218000	7.22	DegP7	DegP_protease_7
Glyma.10G141800	7.53	NA	5prime-3prime_exonuclease_family_protein
Glyma.06G309900	6.32	NA	DCD_(Development_and_Cell_Death)_domain_protein
Glyma.08G045800	6.02	NA	ARM_repeat_superfamily_protein
Glyma.14G152100	2.71	ALDH3H1,ALDH4	aldehyde_dehydrogenase_3H1
Glyma.06G117900	12.64	NA	Protein_kinase_protein_with_adenine_nucleotide_alpha_hydrolases-like_domain
Glyma.04G089700	3.87	PCK1,PEPCK	phosphoenolpyruvate_carboxykinase_1
Glyma.16G167600	8.13	AT-GT2,GT2	Duplicated_homeodomain-like_superfamily_protein
Glyma.15G161200	3.08	NA	Protein_kinase_superfamily_protein
Glyma.06G217200	6.32	NA	Peptidase_C13_family
Glyma.01G186000	7.22	NA	NA
Glyma.12G002200	8.13	NA	NA
Glyma.03G084300	5.42	NA	nuclear_transport_factor_2_(NTF2)_family_protein_/_RNA_recognition_motif_(RRM)-containing_protein
Glyma.15G253800	5.54	emb1507	U5_small_nuclear_ribonucleoprotein_helicase,_putative
Glyma.11G030400	7.53	NA	NA
Glyma.02G049400	11.74	NA	Peptide_methionine_sulfoxide_reductase_family_protein
Glyma.19G260400	12.34	APRR5,PRR5	pseudo-response_regulator_5
Glyma.20G121500	7.53	BAT1	bidirectional_amino_acid_transporter_1
Glyma.19G129500	10.24	NA	Ubiquitin-associated_(UBA)_protein
Glyma.04G012400	9.03	RD2	Adenine_nucleotide_alpha_hydrolases-like_superfamily_protein
Glyma.05G192800	10.24	NA	NA
Glyma.05G080100	7.53	NA	histidine_acid_phosphatase_family_protein
Glyma.16G035100	8.13	ATBRM,BRM,CHA2,CHR2	transcription_regulatory_protein_SNF2,_putative
Glyma.12G173600	7.83	ATSNAK2,GRIK1	geminivirus_rep_interacting_kinase_1
Glyma.17G074800	7.83	ATCIPK6,CIPK6,SIP3,SNRK3.14	SOS3-interacting_protein_3
Glyma.16G040100	8.73	TUA5	tubulin_alpha-5
Glyma.06G089800	12.64	NA	Inositol_1,3,4-trisphosphate_5/6-kinase_family_protein
Glyma.18G103800	6.92	ARPC1,ARPC1B	actin-related_protein_C1B
Glyma.18G292600	6.32	NA	FKBP-like_peptidyl-prolyl_cis-trans_isomerase_family_protein
Glyma.17G076700	6.32	NA	NA
Glyma.11G015600	4.69	NA	CCCH-type_zinc_fingerfamily_protein_with_RNA-binding_domain
Glyma.02G217600	4.48	NA	Phosphoglycerate_mutase_family_protein
Glyma.20G105800	9.33	NA	Zim17-type_zinc_finger_protein
Glyma.04G081900	6.32	NA	ARM_repeat_superfamily_protein
Glyma.03G068700	2.71	NA	Metal-dependent_protein_hydrolase
Glyma.01G084700	5.12	NA	Ribosomal_protein_L12/_ATP-dependent_Clp_protease_adaptor_protein_ClpS_family_protein
Glyma.14G128300	8.43	LUG,RON2	LisH_dimerisation_motif;WD40/YVTN_repeat-like-containing_domain
Glyma.06G211400	9.03	VPS24.1	SNF7_family_protein
Glyma.04G174800	7.22	AHA11,HA11	H(+)-ATPase_11
Glyma.15G163700	12.94	ATVLN4,VLN4	villin_4
Glyma.11G000800	4.28	NA	Cyclase_family_protein
Glyma.20G242400	8.13	NA	NA
Glyma.03G253300	9.33	U1A	spliceosomal_protein_U1A
Glyma.10G296700	7.53	NA	KH_domain-containing_protein_/_zinc_finger_(CCCH_type)_family_protein
Glyma.10G064200	5.72	NA	Exostosin_family_protein
Glyma.06G119700	7.22	NA	Target_of_Myb_protein_1
Glyma.13G114900	6.62	NA	sec34-like_family_protein
Glyma.06G095300	35.22	FIP1	FH_interacting_protein_1
Glyma.08G137200	6.62	NA	Thioredoxin_superfamily_protein
Glyma.02G041700	3.08	DSK2	ubiquitin_family_protein
Glyma.14G201500	8.73	ATTIC110,TIC110	translocon_at_the_inner_envelope_membrane_of_chloroplasts_110
Glyma.U038300	3.47	SQE1,XF1	FAD/NAD(P)-binding_oxidoreductase_family_protein
Glyma.14G060700	6.02	AUX1,MAP1,PIR1,WAV5	Transmembrane_amino_acid_transporter_family_protein
Glyma.14G093900	7.53	ATKEA6,KEA6	K+_efflux_antiporter_6
Glyma.05G098200	9.93	ATMYB73,MYB73	myb_domain_protein_73
Glyma.13G198800	8.13	NA	Protein_with_RING/U-box_and_TRAF-like_domains
Glyma.12G216900	7.83	FQR1	flavodoxin-like_quinone_reductase_1
Glyma.07G235800	5.72	UPL6	ubiquitin_protein_ligase_6
Glyma.16G121300	6.02	NA	RNA-binding_(RRM/RBD/RNP_motifs)_family_protein
Glyma.13G099600	11.74	ATHMA2,HMA2	heavy_metal_atpase_2
Glyma.11G253100	7.74	NA	DNA_topoisomerase,_type_IA,_core
Glyma.02G309600	6.62	NA	Acyl-CoA_N-acyltransferases_(NAT)_superfamily_protein
Glyma.17G023300	6.92	NA	NA
Glyma.03G021900	8.01	AtGRF9,GRF9	growth-regulating_factor_9
Glyma.20G162000	6.32	ATDTX35,DTX35,FFT	detoxifying_efflux_carrier_35
Glyma.03G143400	7.83	NA	RNA-binding_(RRM/RBD/RNP_motifs)_family_protein
Glyma.13G094600	8.73	NA	FGGY_family_of_carbohydrate_kinase
Glyma.19G076300	7.22	NA	Rubisco_methyltransferase_family_protein
Glyma.19G249900	6.62	ILA	ILITYHIA
Glyma.20G122600	8.43	NA	DEA(D/H)-box_RNA_helicase_family_protein
Glyma.03G097900	10.24	ATERS,ERS,OVA3	glutamate_tRNA_synthetase
Glyma.13G159800	6.66	NA	BED_zinc_finger_;hAT_family_dimerisation_domain
Glyma.18G158800	6.92	NA	P-loop_containing_nucleoside_triphosphate_hydrolases_superfamily_protein
Glyma.19G210500	8.43	NA	Transducin/WD40_repeat-like_superfamily_protein
Glyma.07G089600	2.71	AtCASP,CASP	CCAAT-displacement_protein_alternatively_spliced_product
Glyma.06G050300	7.83	NA	CCCH-type_zinc_finger_family_protein
Glyma.19G064200	6.89	NA	NA
Glyma.08G286700	6.92	BETA_CA2,CA18,CA2	carbonic_anhydrase_2
Glyma.03G014900	7.22	NA	DEA(D/H)-box_RNA_helicase_family_protein
Glyma.14G046900	7.83	PUX5	serine/threonine_protein_phosphatase_2A_55_kDa_regulatory_subunit_B_prime_gamma
Glyma.02G078600	14.15	NA	NAD(P)-binding_Rossmann-fold_superfamily_protein
Glyma.07G002100	8.43	NA	Plastid-lipid_associated_protein_PAP_/_fibrillin_family_protein
Glyma.02G078100	8.13	RH39	RH39
Glyma.13G240700	6.92	DES-1-LIKE	fatty_acid_desaturase_family_protein
Glyma.04G004300	14.45	NA	Cyclophilin-like_peptidyl-prolyl_cis-trans_isomerase_family_protein
Glyma.14G206800	8.43	NA	RNA-binding_KH_domain-containing_protein
Glyma.04G095500	10.84	AR1,ATR1	P450_reductase_1
Glyma.02G110400	8.73	NA	NA
Glyma.04G004000	7.83	KAK,UPL3	HEAT_repeat_;HECT-domain_(ubiquitin-transferase)
Glyma.17G240900	11.14	NA	RING/U-box_superfamily_protein
Glyma.19G215400	8.13	NA	Heat_shock_protein_DnaJ_with_tetratricopeptide_repeat
Glyma.07G010200	5.72	NA	Root_hair_defective_3_GTP-binding_protein_(RHD3)
Glyma.10G192200	2.89	NA	Transducin/WD40_repeat-like_superfamily_protein
Glyma.10G292100	6.92	NA	NA
Glyma.13G307600	6.32	ATSYP131,SYP131	syntaxin_of_plants_131
Glyma.07G231800	7.83	SMG7	Telomerase_activating_protein_Est1
Glyma.05G000600	2.89	NA	Transducin/WD40_repeat-like_superfamily_protein
Glyma.06G015300	8.73	NA	NA
Glyma.09G193300	6.32	emb2726	elongation_factor_Ts_family_protein
Glyma.09G044700	9.03	ATPRMT4B,PRMT4B	protein_arginine_methyltransferase_4B
Glyma.17G107400	7.81	NA	Leucine-rich_repeat_family_protein
Glyma.09G156800	7.53	NA	Got1/Sft2-like_vescicle_transport_protein_family
Glyma.11G110300	7.83	NA	3-oxo-5-alpha-steroid_4-dehydrogenase_family_protein
Glyma.16G164700	3.87	TXR1	Protein_Transporter,_Pam16
Glyma.08G227300	6.62	SE	C2H2_zinc-finger_protein_SERRATE_(SE)
Glyma.20G021900	3.47	NA	ZPR1_zinc-finger_domain_protein
Glyma.13G355300	3.27	NA	mitotic_phosphoprotein_Nprime_end_(MPPN)_family_protein
Glyma.11G126400	6.62	FPA	RNA_binding
Glyma.03G250400	12.64	NA	Ankyrin_repeat_family_protein
Glyma.05G181700	8.13	NA	NA
Glyma.08G321100	5.72	NA	Eukaryotic_aspartyl_protease_family_protein
Glyma.19G046300	2.89	LBD41	LOB_domain-containing_protein_41
Glyma.06G056300	6.92	ATHMA8,HMA8,PAA2	P-type_ATPase_of_Arabidopsis_2
Glyma.15G271500	5.72	GFA2	gametophytic_factor_2
Glyma.07G245900	5.33	NA	Fumarylacetoacetate_(FAA)_hydrolase_family
Glyma.04G154500	4.48	MBD10	methyl-CPG-binding_domain_10
Glyma.10G292400	3.47	NA	NA
Glyma.10G212600	5.42	NA	Duplicated_homeodomain-like_superfamily_protein
Glyma.17G047800	8.73	NA	Pectin_lyase-like_superfamily_protein
Glyma.13G327500	2.89	AtIDD2,IDD2	indeterminate(ID)-domain_2
Glyma.07G021100	10.84	CDKB1;2	cyclin-dependent_kinase_B1;2
Glyma.07G246800	9.63	ATKINESIN-13A,KINESIN-13A	P-loop_containing_nucleoside_triphosphate_hydrolases_superfamily_protein
Glyma.06G086200	6.21	NA	Peptidyl-tRNA_hydrolase_II_(PTH2)_family_protein
Glyma.02G108300	3.47	NA	RING/U-box_superfamily_protein
Glyma.19G250600	2.89	ATSRA1,KLK,PIR,PIR121,PIRP,SRA1	transcription_activators
Glyma.13G304100	3.08	FLA21	FASCICLIN-like_arabinogalactan_protein_21_precursor
Glyma.17G161000	4.07	NA	NA
Glyma.15G136400	3.67	ECT7	evolutionarily_conserved_C-terminal_region_7
Glyma.11G000300	4.28	ATHD1,ATHDA19,HD1,HDA1,HDA19,RPD3A	histone_deacetylase_1
Glyma.09G007700	3.08	NA	SWAP_(Suppressor-of-White-APricot)/surp_domain-containing_protein_/_ubiquitin_family_protein
Glyma.16G093600	11.44	NA	Alcohol_dehydrogenase_transcription_factor_Myb/SANT-like_family_protein
Glyma.04G192600	4.69	NA	Galactose_oxidase/kelch_repeat_superfamily_protein
Glyma.14G130900	8.13	NA	NA
Glyma.13G150200	9.93	KDTA	KDO_transferase_A
Glyma.20G219600	5.26	NA	Protein_kinase_family_protein_with_ARM_repeat_domain
Glyma.09G044300	4.69	ATKINESIN-13A,KINESIN-13A	P-loop_containing_nucleoside_triphosphate_hydrolases_superfamily_protein
Glyma.18G106900	6.92	AML5,ML5	MEI2-like_protein_5
Glyma.02G116200	3.08	NA	alpha/beta-Hydrolases_superfamily_protein
Glyma.03G207600	6.08	ATSCC3,SCC3	sister-chromatid_cohesion_protein_3
Glyma.16G030200	8.43	ABIL1	ABI-1-like_1
Glyma.19G033700	2.78	NA	N2,N2-dimethylguanosine_tRNA_methyltransferase
Glyma.14G193600	6.62	NA	NA
Glyma.19G043200	9.23	NA	glycosyl_hydrolase_family_81_protein
Glyma.14G028100	8.13	ATMPK20,MPK20	MAP_kinase_20
Glyma.04G221900	4.01	EMB2763	ribonuclease_II_family_protein
[truncated: 7,237 more rows]
