# Supplementary material for: GRF5 mediates circadian clock to gate seed quality in soybean
Source: Research Square preprint supplement (doi:10.21203/rs.3.rs-5535877/v1), 2025-03-05
Supplement: Supplementary file 7 [file dd43b65502ff1e7b74159bd2.xlsx]

## Sheet: Sheet1
GeneID	variable_id	r	pvalue	Descritpion	Compound.name	superclass	class	subclass
Glyma.04G001600	M106T70_POS	-0.503428	0.0331848	alanyl-tRNA synthetase (AARS, alaS)	L-Serine	Organic acids and derivatives	Carboxylic acids and derivatives	Amino acids, peptides, and analogues
Glyma.04G001600	M120T460_NEG	0.504625	0.0327012	alanyl-tRNA synthetase (AARS, alaS)	L-Cysteine	Organic acids and derivatives	Carboxylic acids and derivatives	Amino acids, peptides, and analogues
Glyma.04G001600	M124T986_POS	-0.520412	0.0268208	alanyl-tRNA synthetase (AARS, alaS)	Nicotinate	Organoheterocyclic compounds	Pyridines and derivatives	Pyridinecarboxylic acids and derivatives
Glyma.04G001600	M130T68_POS	-0.546919	0.0188314	alanyl-tRNA synthetase (AARS, alaS)	5-Oxoproline	Organic acids and derivatives	Carboxylic acids and derivatives	Amino acids, peptides, and analogues
Glyma.04G001600	M151T762_POS	-0.529853	0.0237199	alanyl-tRNA synthetase (AARS, alaS)	Thymol	Lipids and lipid-like molecules	Prenol lipids	Monoterpenoids
Glyma.04G001600	M169T761_POS	-0.506153	0.0320923	alanyl-tRNA synthetase (AARS, alaS)	6-Hydroxy-2,6-dimethyl-2,7-octadien-4-one	Lipids and lipid-like molecules	Prenol lipids	Monoterpenoids
Glyma.04G001600	M177T695_POS	-0.531829	0.0231078	alanyl-tRNA synthetase (AARS, alaS)	4-deoxy-L-threo-hex-4-enopyranuronate
Glyma.04G001600	M191T595_POS	-0.549987	0.018044	alanyl-tRNA synthetase (AARS, alaS)	beta-Damascenone	Organic oxygen compounds	Organooxygen compounds	Carbonyl compounds
Glyma.04G001600	M193T806_POS	-0.56138	0.015344	alanyl-tRNA synthetase (AARS, alaS)	Vitispirane	Organoheterocyclic compounds	Tetrahydrofurans
Glyma.04G001600	M201T74_POS	-0.624464	0.00560047	alanyl-tRNA synthetase (AARS, alaS)	D-erythrose 4-phosphate
Glyma.04G001600	M209T604_POS	-0.574134	0.0127124	alanyl-tRNA synthetase (AARS, alaS)	alpha-Asarone	Benzenoids	Phenol ethers	Anisoles
Glyma.04G001600	M215T194_POS	-0.540812	0.0204798	alanyl-tRNA synthetase (AARS, alaS)	Dethiobiotin	Lipids and lipid-like molecules	Fatty Acyls	Fatty acids and conjugates
Glyma.04G001600	M235T732_POS	-0.502073	0.0337384	alanyl-tRNA synthetase (AARS, alaS)	Germacrene A acid	Lipids and lipid-like molecules	Prenol lipids	Sesquiterpenoids
Glyma.04G001600	M237T724_POS	-0.591586	0.00970815	alanyl-tRNA synthetase (AARS, alaS)	Aubergenone	Lipids and lipid-like molecules	Prenol lipids	Sesquiterpenoids
Glyma.04G001600	M252T98_POS	-0.536019	0.0218509	alanyl-tRNA synthetase (AARS, alaS)	Deoxyadenosine	Nucleosides, nucleotides, and analogues	Purine nucleosides	Purine 2'-deoxyribonucleosides
Glyma.04G001600	M273T639_POS	-0.544806	0.0193896	alanyl-tRNA synthetase (AARS, alaS)	Naringenin chalcone	Phenylpropanoids and polyketides	Linear 1,3-diarylpropanoids	Chalcones and dihydrochalcones
Glyma.04G001600	M277T796_POS	-0.554825	0.016855	alanyl-tRNA synthetase (AARS, alaS)	Dehydrocrepenynic acid	Lipids and lipid-like molecules	Fatty Acyls	Fatty acids and conjugates
Glyma.04G001600	M279T781_POS	-0.531999	0.0230558	alanyl-tRNA synthetase (AARS, alaS)	?-linolenic acid	Lipids and lipid-like molecules	Fatty Acyls	Lineolic acids and derivatives
Glyma.04G001600	M287T811_POS	-0.599327	0.00857297	alanyl-tRNA synthetase (AARS, alaS)	Retinol	Lipids and lipid-like molecules	Prenol lipids	Retinoids
Glyma.04G001600	M288T742_POS	-0.531431	0.0232301	alanyl-tRNA synthetase (AARS, alaS)	Lauryl diethanolamide	Lipids and lipid-like molecules	Fatty Acyls	Fatty amides
Glyma.04G001600	M295T796_POS	-0.548109	0.0185227	alanyl-tRNA synthetase (AARS, alaS)	Colneleic acid	Lipids and lipid-like molecules	Fatty Acyls	Fatty acids and conjugates
Glyma.04G001600	M298T830_POS	-0.564538	0.0146554	alanyl-tRNA synthetase (AARS, alaS)	N7-methylguanosine
Glyma.04G001600	M303T888_POS	-0.530903	0.023393	alanyl-tRNA synthetase (AARS, alaS)	(3R,4R)-3-(6-hydroxy-1,3-benzodioxol-5-yl)-3,4-dihydro-2H-chromene-4,7-diol
Glyma.04G001600	M329T783_POS	-0.503747	0.0330555	alanyl-tRNA synthetase (AARS, alaS)	(4Z,7Z,10Z,13Z,16Z,19Z)-Docosahexaenoic acid	Lipids and lipid-like molecules	Fatty Acyls	Fatty acids and conjugates
Glyma.04G001600	M332T229_NEG	0.5501	0.0180154	alanyl-tRNA synthetase (AARS, alaS)	Glucocapparin	Organic oxygen compounds	Organooxygen compounds	Carbohydrates and carbohydrate conjugates
Glyma.04G001600	M347T786_POS	-0.611268	0.00703341	alanyl-tRNA synthetase (AARS, alaS)	Corticosterone	Lipids and lipid-like molecules	Steroids and steroid derivatives	Hydroxysteroids
Glyma.04G001600	M363T922_NEG	-0.619559	0.00610239	alanyl-tRNA synthetase (AARS, alaS)	XMP
Glyma.04G001600	M391T699_NEG	-0.562385	0.0151221	alanyl-tRNA synthetase (AARS, alaS)	5-O-Demethylnobiletin
Glyma.04G001600	M426T439_NEG	-0.616418	0.00644257	alanyl-tRNA synthetase (AARS, alaS)	ADP group
Glyma.04G001600	M457T870_POS	-0.602946	0.00808024	alanyl-tRNA synthetase (AARS, alaS)	Oleanolic acid	Lipids and lipid-like molecules	Prenol lipids	Triterpenoids
Glyma.04G001600	M490T337_NEG	0.50021	0.0345118	alanyl-tRNA synthetase (AARS, alaS)	Demethylalangiside	Organic oxygen compounds	Organooxygen compounds	Carbohydrates and carbohydrate conjugates
Glyma.04G001600	M640T413_POS	-0.635144	0.00462306	alanyl-tRNA synthetase (AARS, alaS)	Demethyl-desacetyl-rifamycin S	Phenylpropanoids and polyketides	Macrolactams	NA
Glyma.06G001100	M120T460_NEG	0.594291	0.00929853	alanyl-tRNA synthetase (AARS, alaS)	L-Cysteine	Organic acids and derivatives	Carboxylic acids and derivatives	Amino acids, peptides, and analogues
Glyma.06G001100	M120T69_POS	-0.508036	0.0313536	alanyl-tRNA synthetase (AARS, alaS)	Threonine	Organic acids and derivatives	Carboxylic acids and derivatives	Amino acids, peptides, and analogues
Glyma.06G001100	M124T986_POS	-0.594727	0.00923382	alanyl-tRNA synthetase (AARS, alaS)	Nicotinate	Organoheterocyclic compounds	Pyridines and derivatives	Pyridinecarboxylic acids and derivatives
Glyma.06G001100	M130T68_POS	-0.561603	0.0152944	alanyl-tRNA synthetase (AARS, alaS)	5-Oxoproline	Organic acids and derivatives	Carboxylic acids and derivatives	Amino acids, peptides, and analogues
Glyma.06G001100	M162T384_POS	0.540573	0.0205463	alanyl-tRNA synthetase (AARS, alaS)	Indole-3-ethanol	Organoheterocyclic compounds	Indoles and derivatives	Indoles
Glyma.06G001100	M162T73_POS	-0.505938	0.0321773	alanyl-tRNA synthetase (AARS, alaS)	D-2-Aminoadipic acid	Organic acids and derivatives	Carboxylic acids and derivatives	Amino acids, peptides, and analogues
Glyma.06G001100	M177T695_POS	-0.50426	0.0328482	alanyl-tRNA synthetase (AARS, alaS)	4-deoxy-L-threo-hex-4-enopyranuronate
Glyma.06G001100	M201T74_POS	-0.554054	0.0170402	alanyl-tRNA synthetase (AARS, alaS)	D-erythrose 4-phosphate
Glyma.06G001100	M237T724_POS	-0.523469	0.0257841	alanyl-tRNA synthetase (AARS, alaS)	Aubergenone	Lipids and lipid-like molecules	Prenol lipids	Sesquiterpenoids
Glyma.06G001100	M287T811_POS	-0.542389	0.0200436	alanyl-tRNA synthetase (AARS, alaS)	Retinol	Lipids and lipid-like molecules	Prenol lipids	Retinoids
Glyma.06G001100	M288T742_POS	-0.53287	0.0227904	alanyl-tRNA synthetase (AARS, alaS)	Lauryl diethanolamide	Lipids and lipid-like molecules	Fatty Acyls	Fatty amides
Glyma.06G001100	M298T830_POS	-0.584612	0.0108315	alanyl-tRNA synthetase (AARS, alaS)	N7-methylguanosine
Glyma.06G001100	M303T888_POS	-0.522861	0.0259877	alanyl-tRNA synthetase (AARS, alaS)	(3R,4R)-3-(6-hydroxy-1,3-benzodioxol-5-yl)-3,4-dihydro-2H-chromene-4,7-diol
Glyma.06G001100	M332T229_NEG	0.640172	0.00421371	alanyl-tRNA synthetase (AARS, alaS)	Glucocapparin	Organic oxygen compounds	Organooxygen compounds	Carbohydrates and carbohydrate conjugates
Glyma.06G001100	M426T439_NEG	-0.571316	0.0132604	alanyl-tRNA synthetase (AARS, alaS)	ADP group
Glyma.06G001100	M433T374_POS	-0.50281	0.0334366	alanyl-tRNA synthetase (AARS, alaS)	Apigenin-7-O-glucoside	Phenylpropanoids and polyketides	Flavonoids	Flavonoid glycosides
Glyma.06G001100	M457T870_POS	-0.502561	0.0335385	alanyl-tRNA synthetase (AARS, alaS)	Oleanolic acid	Lipids and lipid-like molecules	Prenol lipids	Triterpenoids
Glyma.06G001100	M640T413_POS	-0.546707	0.0188869	alanyl-tRNA synthetase (AARS, alaS)	Demethyl-desacetyl-rifamycin S	Phenylpropanoids and polyketides	Macrolactams	NA
Glyma.11G102100	M106T70_POS	-0.516568	0.0281702	alanyl-tRNA synthetase (AARS, alaS)	L-Serine	Organic acids and derivatives	Carboxylic acids and derivatives	Amino acids, peptides, and analogues
Glyma.11G102100	M146T206_POS	-0.503502	0.0331548	alanyl-tRNA synthetase (AARS, alaS)	2-hydroxy-5-oxoproline
Glyma.11G102100	M169T761_POS	-0.501584	0.0339401	alanyl-tRNA synthetase (AARS, alaS)	6-Hydroxy-2,6-dimethyl-2,7-octadien-4-one	Lipids and lipid-like molecules	Prenol lipids	Monoterpenoids
Glyma.11G102100	M191T595_POS	-0.563046	0.0149776	alanyl-tRNA synthetase (AARS, alaS)	beta-Damascenone	Organic oxygen compounds	Organooxygen compounds	Carbonyl compounds
Glyma.11G102100	M223T934_POS	0.601711	0.00824574	alanyl-tRNA synthetase (AARS, alaS)	1,2-Diphenyl-2-buten-1-one	Phenylpropanoids and polyketides	Stilbenes
Glyma.11G102100	M237T724_POS	-0.532887	0.0227853	alanyl-tRNA synthetase (AARS, alaS)	Aubergenone	Lipids and lipid-like molecules	Prenol lipids	Sesquiterpenoids
Glyma.11G102100	M238T70_POS	-0.502495	0.0335653	alanyl-tRNA synthetase (AARS, alaS)	S-succinylcysteine	Organic acids and derivatives	Carboxylic acids and derivatives	Amino acids, peptides, and analogues
Glyma.11G102100	M258T660_POS	-0.515825	0.0284372	alanyl-tRNA synthetase (AARS, alaS)	Norcraugsodine	Benzenoids	Phenols	Benzenediols
Glyma.11G102100	M279T781_POS	-0.526768	0.0247006	alanyl-tRNA synthetase (AARS, alaS)	?-linolenic acid	Lipids and lipid-like molecules	Fatty Acyls	Lineolic acids and derivatives
Glyma.11G102100	M279T839_POS	-0.518605	0.0274488	alanyl-tRNA synthetase (AARS, alaS)	Di-n-butyl phthalate	Benzenoids	Benzene and substituted derivatives	Benzoic acids and derivatives
Glyma.11G102100	M287T811_POS	-0.667557	0.00246954	alanyl-tRNA synthetase (AARS, alaS)	Retinol	Lipids and lipid-like molecules	Prenol lipids	Retinoids
Glyma.11G102100	M288T742_POS	-0.547128	0.018777	alanyl-tRNA synthetase (AARS, alaS)	Lauryl diethanolamide	Lipids and lipid-like molecules	Fatty Acyls	Fatty amides
Glyma.11G102100	M298T830_POS	-0.531681	0.0231534	alanyl-tRNA synthetase (AARS, alaS)	N7-methylguanosine
Glyma.11G102100	M300T916_POS	-0.534982	0.0221568	alanyl-tRNA synthetase (AARS, alaS)	D-erythro-sphingosine	Organic nitrogen compounds	Organonitrogen compounds	Amines
Glyma.11G102100	M303T888_POS	-0.556404	0.0164808	alanyl-tRNA synthetase (AARS, alaS)	(3R,4R)-3-(6-hydroxy-1,3-benzodioxol-5-yl)-3,4-dihydro-2H-chromene-4,7-diol
Glyma.11G102100	M338T700_POS	-0.500714	0.0343014	alanyl-tRNA synthetase (AARS, alaS)	5-Hydroxymethyldeoxycytidylate	Nucleosides, nucleotides, and analogues	Pyrimidine nucleotides	Pyrimidine deoxyribonucleotides
Glyma.11G102100	M347T786_POS	-0.572317	0.0130636	alanyl-tRNA synthetase (AARS, alaS)	Corticosterone	Lipids and lipid-like molecules	Steroids and steroid derivatives	Hydroxysteroids
Glyma.11G102100	M363T910_POS	-0.509688	0.0307164	alanyl-tRNA synthetase (AARS, alaS)	3,6,9,12-Tetraoxatetracosan-1-ol	Organic oxygen compounds	Organooxygen compounds	Ethers
Glyma.11G102100	M363T922_NEG	-0.702681	0.00114553	alanyl-tRNA synthetase (AARS, alaS)	XMP
Glyma.11G102100	M391T699_NEG	-0.562206	0.0151614	alanyl-tRNA synthetase (AARS, alaS)	5-O-Demethylnobiletin
Glyma.11G102100	M640T413_POS	-0.534028	0.0224414	alanyl-tRNA synthetase (AARS, alaS)	Demethyl-desacetyl-rifamycin S	Phenylpropanoids and polyketides	Macrolactams	NA
Glyma.11G102100	M793T393_2_POS	0.594853	0.00921516	alanyl-tRNA synthetase (AARS, alaS)	Betavulgaroside II	Lipids and lipid-like molecules	Prenol lipids	Triterpenoids
Glyma.11G102100	M93T125_POS	-0.521984	0.0262838	alanyl-tRNA synthetase (AARS, alaS)	1,5-Heptadien-3-yne	Hydrocarbons	Unsaturated hydrocarbons	Enynes
Glyma.01G006100	M1028T698_NEG	-0.531913	0.0230821	arginyl-tRNA synthetase (RARS, argS)	3-(4'O-Malonyl)Rha(1-2)Gal(1-2)GluA-Soyasaponenol B	Lipids and lipid-like molecules	Prenol lipids	Terpene glycosides
Glyma.01G006100	M1030T697_NEG	-0.554357	0.0169672	arginyl-tRNA synthetase (RARS, argS)	Solasodoside A	Lipids and lipid-like molecules	Steroids and steroid derivatives	Steroidal glycosides
Glyma.01G006100	M1031T697_NEG	-0.535036	0.0221409	arginyl-tRNA synthetase (RARS, argS)	Dehydrotomatine	Lipids and lipid-like molecules	Steroids and steroid derivatives	Steroidal glycosides
Glyma.01G006100	M106T70_POS	-0.548486	0.0184259	arginyl-tRNA synthetase (RARS, argS)	L-Serine	Organic acids and derivatives	Carboxylic acids and derivatives	Amino acids, peptides, and analogues
Glyma.01G006100	M110T938_POS	-0.554379	0.0169619	arginyl-tRNA synthetase (RARS, argS)	(S)-2-chloropropanoate
Glyma.01G006100	M114T73_POS	0.57875	0.0118542	arginyl-tRNA synthetase (RARS, argS)	(S)-1-Pyrroline-5-carboxylate	Organic acids and derivatives	Carboxylic acids and derivatives	Amino acids, peptides, and analogues
Glyma.01G006100	M125T937_POS	0.686483	0.00165332	arginyl-tRNA synthetase (RARS, argS)	3-chloro-L-alanine
Glyma.01G006100	M135T69_POS	-0.552255	0.0174785	arginyl-tRNA synthetase (RARS, argS)	(R)-2,3-Dihydroxy-3-methylbutanoate	Lipids and lipid-like molecules	Fatty Acyls	Fatty acids and conjugates
Glyma.01G006100	M138T295_POS	-0.607279	0.0075206	arginyl-tRNA synthetase (RARS, argS)	4-Aminobenzoate	Benzenoids	Benzene and substituted derivatives	Benzoic acids and derivatives
Glyma.01G006100	M148T929_NEG	0.507027	0.0317476	arginyl-tRNA synthetase (RARS, argS)	Benzyl isothiocyanate	Benzenoids	Benzene and substituted derivatives
Glyma.01G006100	M151T762_POS	-0.637252	0.00444765	arginyl-tRNA synthetase (RARS, argS)	Thymol	Lipids and lipid-like molecules	Prenol lipids	Monoterpenoids
Glyma.01G006100	M157T938_POS	-0.581581	0.011351	arginyl-tRNA synthetase (RARS, argS)	2-Phosphoglycolate	Organic acids and derivatives	Organic phosphoric acids and derivatives	Phosphate esters
Glyma.01G006100	M169T761_POS	-0.693588	0.00141152	arginyl-tRNA synthetase (RARS, argS)	6-Hydroxy-2,6-dimethyl-2,7-octadien-4-one	Lipids and lipid-like molecules	Prenol lipids	Monoterpenoids
Glyma.01G006100	M185T66_POS	-0.605594	0.00773437	arginyl-tRNA synthetase (RARS, argS)	5-Hydroxyisourate	Organoheterocyclic compounds	Imidazopyrimidines	Purines and purine derivatives
Glyma.01G006100	M186T66_POS	-0.523374	0.0258158	arginyl-tRNA synthetase (RARS, argS)	2-Amino-3-carboxymuconate semialdehyde	Organic acids and derivatives	Carboxylic acids and derivatives	Amino acids, peptides, and analogues
Glyma.01G006100	M187T69_POS	-0.56893	0.0137387	arginyl-tRNA synthetase (RARS, argS)	3-maleylpyruvate
Glyma.01G006100	M191T595_POS	-0.670248	0.00233656	arginyl-tRNA synthetase (RARS, argS)	beta-Damascenone	Organic oxygen compounds	Organooxygen compounds	Carbonyl compounds
Glyma.01G006100	M193T806_POS	-0.634801	0.00465214	arginyl-tRNA synthetase (RARS, argS)	Vitispirane	Organoheterocyclic compounds	Tetrahydrofurans
Glyma.01G006100	M199T446_POS	-0.579192	0.0117745	arginyl-tRNA synthetase (RARS, argS)	Hercynine	Organic acids and derivatives	Carboxylic acids and derivatives	Amino acids, peptides, and analogues
Glyma.01G006100	M201T74_POS	-0.65131	0.00341167	arginyl-tRNA synthetase (RARS, argS)	D-erythrose 4-phosphate
Glyma.01G006100	M205T928_NEG	0.624444	0.00560243	arginyl-tRNA synthetase (RARS, argS)	3-Oxalomalate	Organic acids and derivatives	Carboxylic acids and derivatives	Tricarboxylic acids and derivatives
Glyma.01G006100	M207T711_POS	-0.54012	0.0206733	arginyl-tRNA synthetase (RARS, argS)	Etrogol	Benzenoids	Phenols	Tyrosols and derivatives
Glyma.01G006100	M209T604_POS	-0.68533	0.00169562	arginyl-tRNA synthetase (RARS, argS)	alpha-Asarone	Benzenoids	Phenol ethers	Anisoles
Glyma.01G006100	M215T194_POS	-0.675927	0.00207517	arginyl-tRNA synthetase (RARS, argS)	Dethiobiotin	Lipids and lipid-like molecules	Fatty Acyls	Fatty acids and conjugates
Glyma.01G006100	M237T723_NEG	-0.552476	0.0174242	arginyl-tRNA synthetase (RARS, argS)	OPC-4:0	Organic oxygen compounds	Organooxygen compounds	Carbonyl compounds
Glyma.01G006100	M237T724_POS	-0.587672	0.0103265	arginyl-tRNA synthetase (RARS, argS)	Aubergenone	Lipids and lipid-like molecules	Prenol lipids	Sesquiterpenoids
Glyma.01G006100	M238T70_POS	-0.676696	0.0020417	arginyl-tRNA synthetase (RARS, argS)	S-succinylcysteine	Organic acids and derivatives	Carboxylic acids and derivatives	Amino acids, peptides, and analogues
Glyma.01G006100	M252T98_POS	-0.562606	0.0150737	arginyl-tRNA synthetase (RARS, argS)	Deoxyadenosine	Nucleosides, nucleotides, and analogues	Purine nucleosides	Purine 2'-deoxyribonucleosides
Glyma.01G006100	M258T660_POS	-0.532892	0.0227838	arginyl-tRNA synthetase (RARS, argS)	Norcraugsodine	Benzenoids	Phenols	Benzenediols
Glyma.01G006100	M269T389_NEG	-0.545919	0.0190938	arginyl-tRNA synthetase (RARS, argS)	4',6,7-Trihydroxyisoflavone	Phenylpropanoids and polyketides	Isoflavonoids	Isoflav-2-enes
Glyma.01G006100	M273T639_POS	-0.550794	0.0178411	arginyl-tRNA synthetase (RARS, argS)	Naringenin chalcone	Phenylpropanoids and polyketides	Linear 1,3-diarylpropanoids	Chalcones and dihydrochalcones
Glyma.01G006100	M277T796_POS	-0.662723	0.0027241	arginyl-tRNA synthetase (RARS, argS)	Dehydrocrepenynic acid	Lipids and lipid-like molecules	Fatty Acyls	Fatty acids and conjugates
Glyma.01G006100	M279T781_POS	-0.674155	0.002154	arginyl-tRNA synthetase (RARS, argS)	?-linolenic acid	Lipids and lipid-like molecules	Fatty Acyls	Lineolic acids and derivatives
Glyma.01G006100	M287T811_POS	-0.641437	0.00411557	arginyl-tRNA synthetase (RARS, argS)	Retinol	Lipids and lipid-like molecules	Prenol lipids	Retinoids
Glyma.01G006100	M291T743_POS	-0.679827	0.00191001	arginyl-tRNA synthetase (RARS, argS)	Deoxy phytoprostane J1	Lipids and lipid-like molecules	Fatty Acyls	Eicosanoids
Glyma.01G006100	M295T796_POS	-0.646601	0.00373392	arginyl-tRNA synthetase (RARS, argS)	Colneleic acid	Lipids and lipid-like molecules	Fatty Acyls	Fatty acids and conjugates
Glyma.01G006100	M298T830_POS	-0.527371	0.0245065	arginyl-tRNA synthetase (RARS, argS)	N7-methylguanosine
Glyma.01G006100	M302T722_POS	-0.515229	0.0286527	arginyl-tRNA synthetase (RARS, argS)	CIF 3
Glyma.01G006100	M303T499_3_POS	0.560259	0.0155943	arginyl-tRNA synthetase (RARS, argS)	Abietic acid	Lipids and lipid-like molecules	Prenol lipids	Diterpenoids
Glyma.01G006100	M303T840_NEG	0.60369	0.00798179	arginyl-tRNA synthetase (RARS, argS)	Discadenine	Organic acids and derivatives	Carboxylic acids and derivatives	Amino acids, peptides, and analogues
Glyma.01G006100	M303T888_POS	-0.545062	0.0193212	arginyl-tRNA synthetase (RARS, argS)	(3R,4R)-3-(6-hydroxy-1,3-benzodioxol-5-yl)-3,4-dihydro-2H-chromene-4,7-diol
Glyma.01G006100	M305T814_POS	-0.747521	0.000362398	arginyl-tRNA synthetase (RARS, argS)	3-Acetoxy-9-heptadecene-4,6-diyn-8-ol.	Lipids and lipid-like molecules	Fatty Acyls	Fatty alcohol esters
Glyma.01G006100	M313T734_NEG	-0.731641	0.000558645	arginyl-tRNA synthetase (RARS, argS)	12,13-DHOME	Lipids and lipid-like molecules	Fatty Acyls	Fatty acids and conjugates
Glyma.01G006100	M319T495_2_POS	-0.564756	0.0146088	arginyl-tRNA synthetase (RARS, argS)	myricetin
Glyma.01G006100	M321T870_POS	-0.621732	0.0058757	arginyl-tRNA synthetase (RARS, argS)	Anomallotusin
Glyma.01G006100	M322T702_NEG	-0.525301	0.0251781	arginyl-tRNA synthetase (RARS, argS)	(-)-Jasmonoyl-L-isoleucine	Organic acids and derivatives	Carboxylic acids and derivatives	Amino acids, peptides, and analogues
Glyma.01G006100	M329T783_POS	-0.652906	0.00330773	arginyl-tRNA synthetase (RARS, argS)	(4Z,7Z,10Z,13Z,16Z,19Z)-Docosahexaenoic acid	Lipids and lipid-like molecules	Fatty Acyls	Fatty acids and conjugates
Glyma.01G006100	M331T724_POS	-0.697683	0.00128601	arginyl-tRNA synthetase (RARS, argS)	(7Z,10Z,13Z,16Z,19Z)-Docosapentaenoic acid	Lipids and lipid-like molecules	Fatty Acyls	Fatty acids and conjugates
Glyma.01G006100	M338T700_POS	-0.668753	0.00240969	arginyl-tRNA synthetase (RARS, argS)	5-Hydroxymethyldeoxycytidylate	Nucleosides, nucleotides, and analogues	Pyrimidine nucleotides	Pyrimidine deoxyribonucleotides
Glyma.01G006100	M339T419_POS	0.5159	0.02841	arginyl-tRNA synthetase (RARS, argS)	1-Caffeoyl-4-deoxyquinic acid	Phenylpropanoids and polyketides	Cinnamic acids and derivatives	Hydroxycinnamic acids and derivatives
Glyma.01G006100	M345T861_POS	-0.513398	0.0293223	arginyl-tRNA synthetase (RARS, argS)	SB 205607	Organoheterocyclic compounds	Quinolines and derivatives	Phenylquinolines
Glyma.01G006100	M347T786_POS	-0.838088	1.41004e-05	arginyl-tRNA synthetase (RARS, argS)	Corticosterone	Lipids and lipid-like molecules	Steroids and steroid derivatives	Hydroxysteroids
Glyma.01G006100	M349T687_POS	-0.558718	0.015944	arginyl-tRNA synthetase (RARS, argS)	Gibberellin A111	Lipids and lipid-like molecules	Prenol lipids	Diterpenoids
Glyma.01G006100	M350T742_POS	-0.622102	0.00583783	arginyl-tRNA synthetase (RARS, argS)	1-(2-carboxyphenylamino)-1-deoxy-D-ribulose 5-phosphate
Glyma.01G006100	M353T693_POS	-0.553874	0.0170835	arginyl-tRNA synthetase (RARS, argS)	Anileridine	Organoheterocyclic compounds	Piperidines	Phenylpiperidines
Glyma.01G006100	M363T910_POS	-0.503869	0.0330058	arginyl-tRNA synthetase (RARS, argS)	3,6,9,12-Tetraoxatetracosan-1-ol	Organic oxygen compounds	Organooxygen compounds	Ethers
Glyma.01G006100	M363T922_NEG	-0.721263	0.000729777	arginyl-tRNA synthetase (RARS, argS)	XMP
Glyma.01G006100	M391T699_NEG	-0.695645	0.00134725	arginyl-tRNA synthetase (RARS, argS)	5-O-Demethylnobiletin
Glyma.01G006100	M413T465_2_POS	0.538339	0.0211786	arginyl-tRNA synthetase (RARS, argS)	Valenciachrome	Lipids and lipid-like molecules	Prenol lipids	Diterpenoids
Glyma.01G006100	M426T439_NEG	-0.632044	0.00489122	arginyl-tRNA synthetase (RARS, argS)	ADP group
Glyma.01G006100	M430T906_POS	-0.513059	0.0294476	arginyl-tRNA synthetase (RARS, argS)	15alpha-Hydroxysolasodine	Lipids and lipid-like molecules	Steroids and steroid derivatives	Steroidal alkaloids
Glyma.01G006100	M457T870_POS	-0.645329	0.00382511	arginyl-tRNA synthetase (RARS, argS)	Oleanolic acid	Lipids and lipid-like molecules	Prenol lipids	Triterpenoids
Glyma.01G006100	M462T445_POS	0.552633	0.0173857	arginyl-tRNA synthetase (RARS, argS)	D-Glucosylsphingosine	Lipids and lipid-like molecules	Sphingolipids	Glycosphingolipids
Glyma.01G006100	M471T243_NEG	-0.53704	0.021553	arginyl-tRNA synthetase (RARS, argS)	Hassmarin	Phenylpropanoids and polyketides	Coumarins and derivatives	Pyranocoumarins
Glyma.01G006100	M472T499_POS	0.539937	0.0207249	arginyl-tRNA synthetase (RARS, argS)	Terfenadine	Benzenoids	Benzene and substituted derivatives	Diphenylmethanes
Glyma.01G006100	M483T518_POS	0.501525	0.0339646	arginyl-tRNA synthetase (RARS, argS)	Gentamicin X2	Organic oxygen compounds	Organooxygen compounds	Carbohydrates and carbohydrate conjugates
Glyma.01G006100	M567T517_2_POS	0.537538	0.0214088	arginyl-tRNA synthetase (RARS, argS)	3-hydroxyechinenone	Lipids and lipid-like molecules	Prenol lipids	Tetraterpenoids
Glyma.01G006100	M575T466_POS	0.581027	0.011448	arginyl-tRNA synthetase (RARS, argS)	Stigmasterol-3-O-beta-D-glucopyranoside	Lipids and lipid-like molecules	Steroids and steroid derivatives	Stigmastanes and derivatives
Glyma.01G006100	M578T517_POS	0.588319	0.0102221	arginyl-tRNA synthetase (RARS, argS)	C37-phenolphthiocerol A
Glyma.01G006100	M629T490_NEG	-0.522897	0.0259758	arginyl-tRNA synthetase (RARS, argS)	GDP-4-acetamido-4,6-dideoxy-alpha-D-mannose	Nucleosides, nucleotides, and analogues	Purine nucleotides	Purine nucleotide sugars
Glyma.01G006100	M640T413_POS	-0.634454	0.00468164	arginyl-tRNA synthetase (RARS, argS)	Demethyl-desacetyl-rifamycin S	Phenylpropanoids and polyketides	Macrolactams	NA
Glyma.01G006100	M663T414_NEG	-0.505998	0.0321536	arginyl-tRNA synthetase (RARS, argS)	NAD+	Nucleosides, nucleotides, and analogues	(5'->5')-dinucleotides	NA
Glyma.01G006100	M663T682_POS	0.645934	0.00378149	arginyl-tRNA synthetase (RARS, argS)	Prosapogenin	Lipids and lipid-like molecules	Prenol lipids	Terpene glycosides
Glyma.01G006100	M883T701_NEG	-0.571129	0.0132973	arginyl-tRNA synthetase (RARS, argS)	Pennogenin 3-O-beta-chacotrioside	Lipids and lipid-like molecules	Steroids and steroid derivatives	Steroidal glycosides
Glyma.01G006100	M894T716_POS	0.504472	0.0327629	arginyl-tRNA synthetase (RARS, argS)	chlorophyll a
Glyma.01G006100	M913T695_NEG	-0.508838	0.031043	arginyl-tRNA synthetase (RARS, argS)	Abutiloside H	Lipids and lipid-like molecules	Steroids and steroid derivatives	Steroidal glycosides
Glyma.01G006100	M915T695_NEG	-0.592287	0.00960067	arginyl-tRNA synthetase (RARS, argS)	Abutiloside B	Lipids and lipid-like molecules	Steroids and steroid derivatives	Steroidal glycosides
Glyma.01G006100	M974T533_3_POS	-0.739083	0.000457801	arginyl-tRNA synthetase (RARS, argS)	Sinapoyl-CoA	Lipids and lipid-like molecules	Fatty Acyls	Fatty acyl thioesters
Glyma.01G006400	M183T520_POS	0.539604	0.0208186	arginyl-tRNA synthetase (RARS, argS)	Triethylphosphate	Organic acids and derivatives	Organic phosphoric acids and derivatives	Phosphate esters
Glyma.01G006400	M220T282_POS	0.549725	0.0181102	arginyl-tRNA synthetase (RARS, argS)	Pentahomomethionine	Organic acids and derivatives	Carboxylic acids and derivatives	Amino acids, peptides, and analogues
Glyma.01G006400	M223T934_POS	0.60933	0.00726676	arginyl-tRNA synthetase (RARS, argS)	1,2-Diphenyl-2-buten-1-one	Phenylpropanoids and polyketides	Stilbenes
Glyma.01G006400	M247T932_POS	-0.589682	0.0100052	arginyl-tRNA synthetase (RARS, argS)	Geranylhydroquinone	Lipids and lipid-like molecules	Prenol lipids	Quinone and hydroquinone lipids
Glyma.01G006400	M279T839_POS	-0.67297	0.00220807	arginyl-tRNA synthetase (RARS, argS)	Di-n-butyl phthalate	Benzenoids	Benzene and substituted derivatives	Benzoic acids and derivatives
Glyma.01G006400	M287T811_POS	-0.542111	0.02012	arginyl-tRNA synthetase (RARS, argS)	Retinol	Lipids and lipid-like molecules	Prenol lipids	Retinoids
Glyma.01G006400	M293T902_POS	0.566398	0.0142615	arginyl-tRNA synthetase (RARS, argS)	Methyl (9Z,12Z,15Z)-9,12,15-octadecatrienoate	Lipids and lipid-like molecules	Fatty Acyls	Lineolic acids and derivatives
Glyma.01G006400	M300T916_POS	-0.610719	0.00709887	arginyl-tRNA synthetase (RARS, argS)	D-erythro-sphingosine	Organic nitrogen compounds	Organonitrogen compounds	Amines
Glyma.01G006400	M363T922_NEG	-0.547844	0.0185913	arginyl-tRNA synthetase (RARS, argS)	XMP
Glyma.01G006400	M373T732_POS	0.504553	0.0327304	arginyl-tRNA synthetase (RARS, argS)	5,7,2',3',4'-Pentamethoxyflavone	Phenylpropanoids and polyketides	Flavonoids	O-methylated flavonoids
Glyma.07G125400	M138T295_POS	-0.609868	0.0072014	arginyl-tRNA synthetase (RARS, argS)	4-Aminobenzoate	Benzenoids	Benzene and substituted derivatives	Benzoic acids and derivatives
Glyma.07G125400	M169T761_POS	-0.556784	0.0163916	arginyl-tRNA synthetase (RARS, argS)	6-Hydroxy-2,6-dimethyl-2,7-octadien-4-one	Lipids and lipid-like molecules	Prenol lipids	Monoterpenoids
Glyma.07G125400	M191T595_POS	-0.530661	0.023468	arginyl-tRNA synthetase (RARS, argS)	beta-Damascenone	Organic oxygen compounds	Organooxygen compounds	Carbonyl compounds
Glyma.07G125400	M193T806_POS	-0.59027	0.00991259	arginyl-tRNA synthetase (RARS, argS)	Vitispirane	Organoheterocyclic compounds	Tetrahydrofurans
Glyma.07G125400	M199T446_POS	-0.502492	0.0335665	arginyl-tRNA synthetase (RARS, argS)	Hercynine	Organic acids and derivatives	Carboxylic acids and derivatives	Amino acids, peptides, and analogues
Glyma.07G125400	M221T67_POS	0.500983	0.0341893	arginyl-tRNA synthetase (RARS, argS)	(5R)-Albaflavenol	Lipids and lipid-like molecules	Prenol lipids	Sesquiterpenoids
Glyma.07G125400	M223T482_NEG	0.529003	0.023987	arginyl-tRNA synthetase (RARS, argS)	Sinapic acid	Phenylpropanoids and polyketides	Cinnamic acids and derivatives	Hydroxycinnamic acids and derivatives
Glyma.07G125400	M223T934_POS	0.50648	0.0319631	arginyl-tRNA synthetase (RARS, argS)	1,2-Diphenyl-2-buten-1-one	Phenylpropanoids and polyketides	Stilbenes
Glyma.07G125400	M247T932_POS	-0.624147	0.00563192	arginyl-tRNA synthetase (RARS, argS)	Geranylhydroquinone	Lipids and lipid-like molecules	Prenol lipids	Quinone and hydroquinone lipids
Glyma.07G125400	M252T98_POS	-0.55216	0.0175019	arginyl-tRNA synthetase (RARS, argS)	Deoxyadenosine	Nucleosides, nucleotides, and analogues	Purine nucleosides	Purine 2'-deoxyribonucleosides
Glyma.07G125400	M258T660_POS	-0.588668	0.0101661	arginyl-tRNA synthetase (RARS, argS)	Norcraugsodine	Benzenoids	Phenols	Benzenediols
Glyma.07G125400	M273T639_POS	-0.517215	0.0279396	arginyl-tRNA synthetase (RARS, argS)	Naringenin chalcone	Phenylpropanoids and polyketides	Linear 1,3-diarylpropanoids	Chalcones and dihydrochalcones
Glyma.07G125400	M281T367_NEG	0.558339	0.0160311	arginyl-tRNA synthetase (RARS, argS)	Dihydrophaseic acid	Lipids and lipid-like molecules	Prenol lipids	Sesquiterpenoids
Glyma.07G125400	M287T811_POS	-0.596462	0.00897995	arginyl-tRNA synthetase (RARS, argS)	Retinol	Lipids and lipid-like molecules	Prenol lipids	Retinoids
Glyma.07G125400	M291T743_POS	-0.518732	0.0274042	arginyl-tRNA synthetase (RARS, argS)	Deoxy phytoprostane J1	Lipids and lipid-like molecules	Fatty Acyls	Eicosanoids
Glyma.07G125400	M298T830_POS	-0.53981	0.0207606	arginyl-tRNA synthetase (RARS, argS)	N7-methylguanosine
Glyma.07G125400	M300T916_POS	-0.644076	0.00391675	arginyl-tRNA synthetase (RARS, argS)	D-erythro-sphingosine	Organic nitrogen compounds	Organonitrogen compounds	Amines
Glyma.07G125400	M306T216_NEG	0.521272	0.0265261	arginyl-tRNA synthetase (RARS, argS)	Lividamine	Organic oxygen compounds	Organooxygen compounds	Carbohydrates and carbohydrate conjugates
Glyma.07G125400	M321T870_POS	-0.563821	0.0148096	arginyl-tRNA synthetase (RARS, argS)	Anomallotusin
Glyma.07G125400	M347T786_POS	-0.500454	0.0344096	arginyl-tRNA synthetase (RARS, argS)	Corticosterone	Lipids and lipid-like molecules	Steroids and steroid derivatives	Hydroxysteroids
Glyma.07G125400	M363T922_NEG	-0.603318	0.00803083	arginyl-tRNA synthetase (RARS, argS)	XMP
Glyma.07G125400	M377T346_POS	-0.550343	0.0179543	arginyl-tRNA synthetase (RARS, argS)	Riboflavin	Organoheterocyclic compounds	Pteridines and derivatives	Alloxazines and isoalloxazines
Glyma.07G125400	M391T699_NEG	-0.505067	0.0325241	arginyl-tRNA synthetase (RARS, argS)	5-O-Demethylnobiletin
Glyma.07G125400	M793T393_2_POS	0.533506	0.0225982	arginyl-tRNA synthetase (RARS, argS)	Betavulgaroside II	Lipids and lipid-like molecules	Prenol lipids	Triterpenoids
Glyma.03G089300	M102T71_POS	0.658499	0.00296386	ASPARTYL/LYSYL-TRNA SYNTHETASE // ASPARAGINE--TRNA LIGASE, CYTOPLASMIC 2	1-Aminocyclopropane-1-carboxylate	Organic acids and derivatives	Carboxylic acids and derivatives	Amino acids, peptides, and analogues
Glyma.03G089300	M104T65_NEG	0.624584	0.00558862	ASPARTYL/LYSYL-TRNA SYNTHETASE // ASPARAGINE--TRNA LIGASE, CYTOPLASMIC 2	Serine	Organic acids and derivatives	Carboxylic acids and derivatives	Amino acids, peptides, and analogues
Glyma.03G089300	M105T714_POS	0.679836	0.00190968	ASPARTYL/LYSYL-TRNA SYNTHETASE // ASPARAGINE--TRNA LIGASE, CYTOPLASMIC 2	Styrene	Benzenoids	Benzene and substituted derivatives	Styrenes
Glyma.03G089300	M106T70_POS	0.56837	0.013853	ASPARTYL/LYSYL-TRNA SYNTHETASE // ASPARAGINE--TRNA LIGASE, CYTOPLASMIC 2	L-Serine	Organic acids and derivatives	Carboxylic acids and derivatives	Amino acids, peptides, and analogues
Glyma.03G089300	M113T68_NEG	0.637675	0.00441315	ASPARTYL/LYSYL-TRNA SYNTHETASE // ASPARAGINE--TRNA LIGASE, CYTOPLASMIC 2	2-Hydroxy-2,4-pentadienoate	Lipids and lipid-like molecules	Fatty Acyls	Fatty acids and conjugates
Glyma.03G089300	M116T69_POS	0.524209	0.025538	ASPARTYL/LYSYL-TRNA SYNTHETASE // ASPARAGINE--TRNA LIGASE, CYTOPLASMIC 2	L-Proline	Organic acids and derivatives	Carboxylic acids and derivatives	Amino acids, peptides, and analogues
Glyma.03G089300	M118T66_NEG	0.662214	0.00275215	ASPARTYL/LYSYL-TRNA SYNTHETASE // ASPARAGINE--TRNA LIGASE, CYTOPLASMIC 2	L-Allothreonine	Organic acids and derivatives	Carboxylic acids and derivatives	Amino acids, peptides, and analogues
Glyma.03G089300	M118T73_POS	0.756158	0.00028263	ASPARTYL/LYSYL-TRNA SYNTHETASE // ASPARAGINE--TRNA LIGASE, CYTOPLASMIC 2	VALINE	Organic acids and derivatives	Carboxylic acids and derivatives	Amino acids, peptides, and analogues
Glyma.03G089300	M120T69_POS	0.644689	0.00387172	ASPARTYL/LYSYL-TRNA SYNTHETASE // ASPARAGINE--TRNA LIGASE, CYTOPLASMIC 2	Threonine	Organic acids and derivatives	Carboxylic acids and derivatives	Amino acids, peptides, and analogues
Glyma.03G089300	M124T986_POS	0.504271	0.0328437	ASPARTYL/LYSYL-TRNA SYNTHETASE // ASPARAGINE--TRNA LIGASE, CYTOPLASMIC 2	Nicotinate	Organoheterocyclic compounds	Pyridines and derivatives	Pyridinecarboxylic acids and derivatives
Glyma.03G089300	M125T71_POS	0.606792	0.00758188	ASPARTYL/LYSYL-TRNA SYNTHETASE // ASPARAGINE--TRNA LIGASE, CYTOPLASMIC 2	Methylimidazole acetaldehyde	Organoheterocyclic compounds	Azoles	Imidazoles
Glyma.03G089300	M130T68_POS	0.760019	0.00025209	ASPARTYL/LYSYL-TRNA SYNTHETASE // ASPARAGINE--TRNA LIGASE, CYTOPLASMIC 2	5-Oxoproline	Organic acids and derivatives	Carboxylic acids and derivatives	Amino acids, peptides, and analogues
Glyma.03G089300	M132T98_2_POS	0.737407	0.000479061	ASPARTYL/LYSYL-TRNA SYNTHETASE // ASPARAGINE--TRNA LIGASE, CYTOPLASMIC 2	L-Isoleucine	Organic acids and derivatives	Carboxylic acids and derivatives	Amino acids, peptides, and analogues
Glyma.03G089300	M133T905_POS	0.542607	0.019984	ASPARTYL/LYSYL-TRNA SYNTHETASE // ASPARAGINE--TRNA LIGASE, CYTOPLASMIC 2	o-Isopropenyl toluene	Benzenoids	Benzene and substituted derivatives	Phenylpropenes
Glyma.03G089300	M136T410_NEG	-0.574865	0.0125733	ASPARTYL/LYSYL-TRNA SYNTHETASE // ASPARAGINE--TRNA LIGASE, CYTOPLASMIC 2	4-Aminobenzoic acid	Benzenoids	Benzene and substituted derivatives	Benzoic acids and derivatives
Glyma.03G089300	M142T67_POS	0.533803	0.0225089	ASPARTYL/LYSYL-TRNA SYNTHETASE // ASPARAGINE--TRNA LIGASE, CYTOPLASMIC 2	carbamoyl phosphate
Glyma.03G089300	M144T70_POS	0.702723	0.00114442	ASPARTYL/LYSYL-TRNA SYNTHETASE // ASPARAGINE--TRNA LIGASE, CYTOPLASMIC 2	3-(Methoxymethylene)-2-pyrrolidinethione	Organoheterocyclic compounds	Oxazepines	1,3-oxazepines
Glyma.03G089300	M147T69_POS	0.57914	0.0117838	ASPARTYL/LYSYL-TRNA SYNTHETASE // ASPARAGINE--TRNA LIGASE, CYTOPLASMIC 2	L-Glutamine	Organic acids and derivatives	Carboxylic acids and derivatives	Amino acids, peptides, and analogues
Glyma.03G089300	M149T695_POS	0.561197	0.0153846	ASPARTYL/LYSYL-TRNA SYNTHETASE // ASPARAGINE--TRNA LIGASE, CYTOPLASMIC 2	1,3,5,7-Undecatetraene	Hydrocarbons	Unsaturated hydrocarbons	Olefins
Glyma.03G089300	M158T107_NEG	0.613726	0.00674619	ASPARTYL/LYSYL-TRNA SYNTHETASE // ASPARAGINE--TRNA LIGASE, CYTOPLASMIC 2	5-Acetamidopentanoate	Lipids and lipid-like molecules	Fatty Acyls	Fatty acids and conjugates
Glyma.03G089300	M158T114_POS	0.549425	0.0181861	ASPARTYL/LYSYL-TRNA SYNTHETASE // ASPARAGINE--TRNA LIGASE, CYTOPLASMIC 2	N-Acetyl-L-proline	Organic acids and derivatives	Carboxylic acids and derivatives	Amino acids, peptides, and analogues
Glyma.03G089300	M159T709_POS	0.502593	0.0335252	ASPARTYL/LYSYL-TRNA SYNTHETASE // ASPARAGINE--TRNA LIGASE, CYTOPLASMIC 2	2-isopropylmaleate
Glyma.03G089300	M170T147_POS	0.58456	0.0108403	ASPARTYL/LYSYL-TRNA SYNTHETASE // ASPARAGINE--TRNA LIGASE, CYTOPLASMIC 2	Noradrenaline	Benzenoids	Phenols	Benzenediols
Glyma.03G089300	M172T298_POS	0.824258	2.59388e-05	ASPARTYL/LYSYL-TRNA SYNTHETASE // ASPARAGINE--TRNA LIGASE, CYTOPLASMIC 2	N-Butanoylhomoserine lactone	Organic acids and derivatives	Carboxylic acids and derivatives	Amino acids, peptides, and analogues
Glyma.03G089300	M177T695_POS	0.554659	0.0168946	ASPARTYL/LYSYL-TRNA SYNTHETASE // ASPARAGINE--TRNA LIGASE, CYTOPLASMIC 2	4-deoxy-L-threo-hex-4-enopyranuronate
Glyma.03G089300	M182T152_POS	0.559811	0.0156954	ASPARTYL/LYSYL-TRNA SYNTHETASE // ASPARAGINE--TRNA LIGASE, CYTOPLASMIC 2	L-Phosphinothricin	Organic acids and derivatives	Carboxylic acids and derivatives	Amino acids, peptides, and analogues
Glyma.03G089300	M185T66_POS	0.595694	0.00909164	ASPARTYL/LYSYL-TRNA SYNTHETASE // ASPARAGINE--TRNA LIGASE, CYTOPLASMIC 2	5-Hydroxyisourate	Organoheterocyclic compounds	Imidazopyrimidines	Purines and purine derivatives
Glyma.03G089300	M186T107_POS	0.638104	0.00437835	ASPARTYL/LYSYL-TRNA SYNTHETASE // ASPARAGINE--TRNA LIGASE, CYTOPLASMIC 2	O-phospho-L-serine
Glyma.03G089300	M186T417_POS	0.546871	0.018844	ASPARTYL/LYSYL-TRNA SYNTHETASE // ASPARAGINE--TRNA LIGASE, CYTOPLASMIC 2	Ecgonine	Alkaloids and derivatives	Tropane alkaloids	NA
Glyma.03G089300	M186T66_POS	0.638581	0.00433992	ASPARTYL/LYSYL-TRNA SYNTHETASE // ASPARAGINE--TRNA LIGASE, CYTOPLASMIC 2	2-Amino-3-carboxymuconate semialdehyde	Organic acids and derivatives	Carboxylic acids and derivatives	Amino acids, peptides, and analogues
Glyma.03G089300	M190T75_POS	0.796849	7.53991e-05	ASPARTYL/LYSYL-TRNA SYNTHETASE // ASPARAGINE--TRNA LIGASE, CYTOPLASMIC 2	N-Acetyl-DL-glutamic acid	Organic acids and derivatives	Carboxylic acids and derivatives	Amino acids, peptides, and analogues
Glyma.03G089300	M191T197_POS	0.529922	0.0236983	ASPARTYL/LYSYL-TRNA SYNTHETASE // ASPARAGINE--TRNA LIGASE, CYTOPLASMIC 2	(R)-3-((R)-3-Hydroxybutanoyloxy)butanoate	Organic acids and derivatives	Hydroxy acids and derivatives	Beta hydroxy acids and derivatives
Glyma.03G089300	M195T488_POS	0.615985	0.00649063	ASPARTYL/LYSYL-TRNA SYNTHETASE // ASPARAGINE--TRNA LIGASE, CYTOPLASMIC 2	Ferulate	Phenylpropanoids and polyketides	Cinnamic acids and derivatives	Hydroxycinnamic acids and derivatives
Glyma.03G089300	M201T74_POS	0.749238	0.000345192	ASPARTYL/LYSYL-TRNA SYNTHETASE // ASPARAGINE--TRNA LIGASE, CYTOPLASMIC 2	D-erythrose 4-phosphate
Glyma.03G089300	M203T107_NEG	0.725981	0.000647226	ASPARTYL/LYSYL-TRNA SYNTHETASE // ASPARAGINE--TRNA LIGASE, CYTOPLASMIC 2	D-Trp	Organoheterocyclic compounds	Indoles and derivatives	Indolyl carboxylic acids and derivatives
Glyma.03G089300	M205T107_POS	0.69068	0.00150668	ASPARTYL/LYSYL-TRNA SYNTHETASE // ASPARAGINE--TRNA LIGASE, CYTOPLASMIC 2	2-Oxo-8-methylthiooctanoic acid	Organic acids and derivatives	Keto acids and derivatives	Medium-chain keto acids and derivatives
Glyma.03G089300	M207T711_POS	0.51584	0.0284317	ASPARTYL/LYSYL-TRNA SYNTHETASE // ASPARAGINE--TRNA LIGASE, CYTOPLASMIC 2	Etrogol	Benzenoids	Phenols	Tyrosols and derivatives
Glyma.03G089300	M208T410_NEG	-0.565505	0.0144494	ASPARTYL/LYSYL-TRNA SYNTHETASE // ASPARAGINE--TRNA LIGASE, CYTOPLASMIC 2	p-Hydroxyphenylacetylglycine	Organic acids and derivatives	Carboxylic acids and derivatives	Amino acids, peptides, and analogues
Glyma.03G089300	M209T604_POS	0.507866	0.0314196	ASPARTYL/LYSYL-TRNA SYNTHETASE // ASPARAGINE--TRNA LIGASE, CYTOPLASMIC 2	alpha-Asarone	Benzenoids	Phenol ethers	Anisoles
Glyma.03G089300	M213T695_POS	0.5012	0.0340991	ASPARTYL/LYSYL-TRNA SYNTHETASE // ASPARAGINE--TRNA LIGASE, CYTOPLASMIC 2	Cucurbic acid	Lipids and lipid-like molecules	Fatty Acyls	Lineolic acids and derivatives
Glyma.03G089300	M217T931_POS	0.515445	0.0285745	ASPARTYL/LYSYL-TRNA SYNTHETASE // ASPARAGINE--TRNA LIGASE, CYTOPLASMIC 2	Lycoperodine 1	Organoheterocyclic compounds	Indoles and derivatives	Pyridoindoles
Glyma.03G089300	M217T97_POS	0.566571	0.0142253	ASPARTYL/LYSYL-TRNA SYNTHETASE // ASPARAGINE--TRNA LIGASE, CYTOPLASMIC 2	gamma-Glutamyl-gamma-aminobutyraldehyde	Organic acids and derivatives	Carboxylic acids and derivatives	Amino acids, peptides, and analogues
Glyma.03G089300	M222T717_NEG	0.500535	0.0343759	ASPARTYL/LYSYL-TRNA SYNTHETASE // ASPARAGINE--TRNA LIGASE, CYTOPLASMIC 2	Tigloidine	Alkaloids and derivatives	Tropane alkaloids
Glyma.03G089300	M227T102_NEG	0.719195	0.000768637	ASPARTYL/LYSYL-TRNA SYNTHETASE // ASPARAGINE--TRNA LIGASE, CYTOPLASMIC 2	(R)-2-(Phosphonomethyl)malate	Organic acids and derivatives	Hydroxy acids and derivatives	Short-chain hydroxy acids and derivatives
Glyma.03G089300	M233T424_POS	-0.695334	0.00135681	ASPARTYL/LYSYL-TRNA SYNTHETASE // ASPARAGINE--TRNA LIGASE, CYTOPLASMIC 2	Melampolide	Lipids and lipid-like molecules	Prenol lipids	Terpene lactones
Glyma.03G089300	M235T732_POS	0.571519	0.0132203	ASPARTYL/LYSYL-TRNA SYNTHETASE // ASPARAGINE--TRNA LIGASE, CYTOPLASMIC 2	Germacrene A acid	Lipids and lipid-like molecules	Prenol lipids	Sesquiterpenoids
Glyma.03G089300	M237T724_POS	0.589071	0.0101019	ASPARTYL/LYSYL-TRNA SYNTHETASE // ASPARAGINE--TRNA LIGASE, CYTOPLASMIC 2	Aubergenone	Lipids and lipid-like molecules	Prenol lipids	Sesquiterpenoids
Glyma.03G089300	M243T253_POS	0.549829	0.0180839	ASPARTYL/LYSYL-TRNA SYNTHETASE // ASPARAGINE--TRNA LIGASE, CYTOPLASMIC 2	Lumichrome	Organoheterocyclic compounds	Pteridines and derivatives	Alloxazines and isoalloxazines
Glyma.03G089300	M252T410_2_NEG	-0.602722	0.00810996	ASPARTYL/LYSYL-TRNA SYNTHETASE // ASPARAGINE--TRNA LIGASE, CYTOPLASMIC 2	N-Salicyloylaspartic acid	Organic acids and derivatives	Carboxylic acids and derivatives	Amino acids, peptides, and analogues
Glyma.03G089300	M253T410_NEG	-0.589316	0.010063	ASPARTYL/LYSYL-TRNA SYNTHETASE // ASPARAGINE--TRNA LIGASE, CYTOPLASMIC 2	5,7-Dihydroxyisoflavone	Phenylpropanoids and polyketides	Isoflavonoids	Isoflav-2-enes
Glyma.03G089300	M288T742_POS	0.602349	0.00815982	ASPARTYL/LYSYL-TRNA SYNTHETASE // ASPARAGINE--TRNA LIGASE, CYTOPLASMIC 2	Lauryl diethanolamide	Lipids and lipid-like molecules	Fatty Acyls	Fatty amides
Glyma.03G089300	M294T718_NEG	0.526804	0.0246891	ASPARTYL/LYSYL-TRNA SYNTHETASE // ASPARAGINE--TRNA LIGASE, CYTOPLASMIC 2	5-amino-1-(5-phospho-beta-D-ribosyl)imidazole
Glyma.03G089300	M303T888_POS	0.521509	0.0264451	ASPARTYL/LYSYL-TRNA SYNTHETASE // ASPARAGINE--TRNA LIGASE, CYTOPLASMIC 2	(3R,4R)-3-(6-hydroxy-1,3-benzodioxol-5-yl)-3,4-dihydro-2H-chromene-4,7-diol
Glyma.03G089300	M307T108_NEG	0.511098	0.0301806	ASPARTYL/LYSYL-TRNA SYNTHETASE // ASPARAGINE--TRNA LIGASE, CYTOPLASMIC 2	(R)-5-Diphosphomevalonate	Organic oxygen compounds	Organic oxoanionic compounds	Organic pyrophosphates
Glyma.03G089300	M311T736_NEG	0.56281	0.015029	ASPARTYL/LYSYL-TRNA SYNTHETASE // ASPARAGINE--TRNA LIGASE, CYTOPLASMIC 2	13-Hydroperoxyoctadecadienoic acid	Lipids and lipid-like molecules	Fatty Acyls	Lineolic acids and derivatives
Glyma.03G089300	M316T132_NEG	-0.604919	0.00782139	ASPARTYL/LYSYL-TRNA SYNTHETASE // ASPARAGINE--TRNA LIGASE, CYTOPLASMIC 2	Citramine	Organoheterocyclic compounds	Quinolines and derivatives	Benzoquinolines
Glyma.03G089300	M321T787_POS	0.581896	0.0112961	ASPARTYL/LYSYL-TRNA SYNTHETASE // ASPARAGINE--TRNA LIGASE, CYTOPLASMIC 2	(15S)-15-Hydroxy-5,8,11-cis-13-trans-eicosatetraenoate	Lipids and lipid-like molecules	Fatty Acyls	Eicosanoids
Glyma.03G089300	M336T913_POS	0.572424	0.0130427	ASPARTYL/LYSYL-TRNA SYNTHETASE // ASPARAGINE--TRNA LIGASE, CYTOPLASMIC 2	N4-(beta-N-acetyl-D-glucosaminyl)-L-asparagine
Glyma.03G089300	M338T700_POS	0.5353	0.0220627	ASPARTYL/LYSYL-TRNA SYNTHETASE // ASPARAGINE--TRNA LIGASE, CYTOPLASMIC 2	5-Hydroxymethyldeoxycytidylate	Nucleosides, nucleotides, and analogues	Pyrimidine nucleotides	Pyrimidine deoxyribonucleotides
Glyma.03G089300	M347T615_POS	0.552858	0.0173308	ASPARTYL/LYSYL-TRNA SYNTHETASE // ASPARAGINE--TRNA LIGASE, CYTOPLASMIC 2	Taxa-4(20),11(12)-dien-5alpha-acetoxy-10beta-ol	Lipids and lipid-like molecules	Prenol lipids	Diterpenoids
Glyma.03G089300	M347T786_POS	0.504795	0.0326332	ASPARTYL/LYSYL-TRNA SYNTHETASE // ASPARAGINE--TRNA LIGASE, CYTOPLASMIC 2	Corticosterone	Lipids and lipid-like molecules	Steroids and steroid derivatives	Hydroxysteroids
Glyma.03G089300	M349T370_NEG	0.502193	0.0336894	ASPARTYL/LYSYL-TRNA SYNTHETASE // ASPARAGINE--TRNA LIGASE, CYTOPLASMIC 2	Polyneuridine aldehyde
Glyma.03G089300	M363T910_POS	0.555808	0.0166212	ASPARTYL/LYSYL-TRNA SYNTHETASE // ASPARAGINE--TRNA LIGASE, CYTOPLASMIC 2	3,6,9,12-Tetraoxatetracosan-1-ol	Organic oxygen compounds	Organooxygen compounds	Ethers
Glyma.03G089300	M385T468_NEG	0.507518	0.0315553	ASPARTYL/LYSYL-TRNA SYNTHETASE // ASPARAGINE--TRNA LIGASE, CYTOPLASMIC 2	(13S,14R)-1,13-Dihydroxy-N-methylcanadine	Alkaloids and derivatives	Protoberberine alkaloids and derivatives	NA
Glyma.03G089300	M387T351_POS	0.649256	0.00354927	ASPARTYL/LYSYL-TRNA SYNTHETASE // ASPARAGINE--TRNA LIGASE, CYTOPLASMIC 2	Citroside A	Lipids and lipid-like molecules	Prenol lipids	Terpene glycosides
Glyma.03G089300	M391T699_NEG	0.603165	0.00805111	ASPARTYL/LYSYL-TRNA SYNTHETASE // ASPARAGINE--TRNA LIGASE, CYTOPLASMIC 2	5-O-Demethylnobiletin
Glyma.03G089300	M399T68_POS	0.5227	0.026042	ASPARTYL/LYSYL-TRNA SYNTHETASE // ASPARAGINE--TRNA LIGASE, CYTOPLASMIC 2	S-Adenosyl-L-methionine	Nucleosides, nucleotides, and analogues	5'-deoxyribonucleosides	5'-deoxy-5'-thionucleosides
Glyma.03G089300	M401T614_POS	0.517709	0.0277644	ASPARTYL/LYSYL-TRNA SYNTHETASE // ASPARAGINE--TRNA LIGASE, CYTOPLASMIC 2	Citrusoside A	Lipids and lipid-like molecules	Saccharolipids
Glyma.03G089300	M415T144_POS	0.532206	0.0229926	ASPARTYL/LYSYL-TRNA SYNTHETASE // ASPARAGINE--TRNA LIGASE, CYTOPLASMIC 2	Deacetylvindoline	Alkaloids and derivatives	Plumeran-type alkaloids	NA
Glyma.03G089300	M430T906_POS	0.541121	0.0203936	ASPARTYL/LYSYL-TRNA SYNTHETASE // ASPARAGINE--TRNA LIGASE, CYTOPLASMIC 2	15alpha-Hydroxysolasodine	Lipids and lipid-like molecules	Steroids and steroid derivatives	Steroidal alkaloids
Glyma.03G089300	M471T243_NEG	0.543188	0.0198255	ASPARTYL/LYSYL-TRNA SYNTHETASE // ASPARAGINE--TRNA LIGASE, CYTOPLASMIC 2	Hassmarin	Phenylpropanoids and polyketides	Coumarins and derivatives	Pyranocoumarins
Glyma.03G089300	M484T489_POS	0.513829	0.0291634	ASPARTYL/LYSYL-TRNA SYNTHETASE // ASPARAGINE--TRNA LIGASE, CYTOPLASMIC 2	Kanamycin B	Organic oxygen compounds	Organooxygen compounds	Carbohydrates and carbohydrate conjugates
Glyma.03G089300	M508T465_POS	0.614636	0.00664227	ASPARTYL/LYSYL-TRNA SYNTHETASE // ASPARAGINE--TRNA LIGASE, CYTOPLASMIC 2	2-hydroxy-dATP
Glyma.03G089300	M511T409_POS	0.651497	0.00339933	ASPARTYL/LYSYL-TRNA SYNTHETASE // ASPARAGINE--TRNA LIGASE, CYTOPLASMIC 2	Lactoside B	Organoheterocyclic compounds	Naphthopyrans
Glyma.03G089300	M527T188_1_POS	-0.513013	0.0294647	ASPARTYL/LYSYL-TRNA SYNTHETASE // ASPARAGINE--TRNA LIGASE, CYTOPLASMIC 2	N6-acetylkanamycin-B
Glyma.03G089300	M609T490_NEG	0.544405	0.0194968	ASPARTYL/LYSYL-TRNA SYNTHETASE // ASPARAGINE--TRNA LIGASE, CYTOPLASMIC 2	Gallocatechin-(4alpha->6)-gallocatechin	Phenylpropanoids and polyketides	Flavonoids	Biflavonoids and polyflavonoids
Glyma.03G089300	M611T637_POS	0.588627	0.0101728	ASPARTYL/LYSYL-TRNA SYNTHETASE // ASPARAGINE--TRNA LIGASE, CYTOPLASMIC 2	Divinylprotochlorophyllide
Glyma.03G089300	M640T413_POS	0.600059	0.00847139	ASPARTYL/LYSYL-TRNA SYNTHETASE // ASPARAGINE--TRNA LIGASE, CYTOPLASMIC 2	Demethyl-desacetyl-rifamycin S	Phenylpropanoids and polyketides	Macrolactams	NA
Glyma.03G089300	M719T612_NEG	-0.607623	0.0074775	ASPARTYL/LYSYL-TRNA SYNTHETASE // ASPARAGINE--TRNA LIGASE, CYTOPLASMIC 2	Arvenin I	Lipids and lipid-like molecules	Steroids and steroid derivatives	Steroidal glycosides
Glyma.03G089300	M86T98_POS	0.734641	0.000515953	ASPARTYL/LYSYL-TRNA SYNTHETASE // ASPARAGINE--TRNA LIGASE, CYTOPLASMIC 2	N-Methylpyrrolidine	Organoheterocyclic compounds	Pyrrolidines	N-alkylpyrrolidines
Glyma.03G089300	M88T67_NEG	0.663256	0.00269504	ASPARTYL/LYSYL-TRNA SYNTHETASE // ASPARAGINE--TRNA LIGASE, CYTOPLASMIC 2	L-Alanine	Organic acids and derivatives	Carboxylic acids and derivatives	Amino acids, peptides, and analogues
Glyma.03G109000	M1046T649_NEG	-0.686086	0.0016678	ASPARTYL/LYSYL-TRNA SYNTHETASE // LYSINE--TRNA LIGASE	Solanigroside H	Lipids and lipid-like molecules	Steroids and steroid derivatives	Steroidal glycosides
Glyma.03G109000	M105T714_POS	-0.68006	0.00190054	ASPARTYL/LYSYL-TRNA SYNTHETASE // LYSINE--TRNA LIGASE	Styrene	Benzenoids	Benzene and substituted derivatives	Styrenes
Glyma.03G109000	M111T68_NEG	-0.608586	0.007358	ASPARTYL/LYSYL-TRNA SYNTHETASE // LYSINE--TRNA LIGASE	Hydroxymethylphosphonate	Organic acids and derivatives	Organic phosphonic acids and derivatives	Organic phosphonic acids
Glyma.03G109000	M123T168_POS	-0.569518	0.0136197	ASPARTYL/LYSYL-TRNA SYNTHETASE // LYSINE--TRNA LIGASE	Benzoic acid	Benzenoids	Benzene and substituted derivatives	Benzoic acids and derivatives
Glyma.03G109000	M130T73_2_POS	-0.638226	0.00436846	ASPARTYL/LYSYL-TRNA SYNTHETASE // LYSINE--TRNA LIGASE	DL-Pipecolinic acid	Organic acids and derivatives	Carboxylic acids and derivatives	Amino acids, peptides, and analogues
Glyma.03G109000	M135T527_POS	-0.50334	0.0332207	ASPARTYL/LYSYL-TRNA SYNTHETASE // LYSINE--TRNA LIGASE	2,6-Dimethyl-1,3,5,7-octatetraenene	Hydrocarbons	Unsaturated hydrocarbons	Olefins
Glyma.03G109000	M138T295_POS	-0.606428	0.00762795	ASPARTYL/LYSYL-TRNA SYNTHETASE // LYSINE--TRNA LIGASE	4-Aminobenzoate	Benzenoids	Benzene and substituted derivatives	Benzoic acids and derivatives
Glyma.03G109000	M147T190_POS	-0.576807	0.0122095	ASPARTYL/LYSYL-TRNA SYNTHETASE // LYSINE--TRNA LIGASE	Coumarin	Phenylpropanoids and polyketides	Coumarins and derivatives
Glyma.03G109000	M151T119_NEG	-0.528589	0.024118	ASPARTYL/LYSYL-TRNA SYNTHETASE // LYSINE--TRNA LIGASE	Vanillin	Benzenoids	Phenols	Methoxyphenols
Glyma.03G109000	M165T216_POS	-0.545636	0.0191687	ASPARTYL/LYSYL-TRNA SYNTHETASE // LYSINE--TRNA LIGASE	4-Coumarate	Phenylpropanoids and polyketides	Cinnamic acids and derivatives	Hydroxycinnamic acids and derivatives
Glyma.03G109000	M168T96_POS	-0.668682	0.0024132	ASPARTYL/LYSYL-TRNA SYNTHETASE // LYSINE--TRNA LIGASE	Pyridoxal hydrochrolide	Organoheterocyclic compounds	Pyridines and derivatives	Pyridine carboxaldehydes
Glyma.03G109000	M169T761_POS	-0.57722	0.0121332	ASPARTYL/LYSYL-TRNA SYNTHETASE // LYSINE--TRNA LIGASE	6-Hydroxy-2,6-dimethyl-2,7-octadien-4-one	Lipids and lipid-like molecules	Prenol lipids	Monoterpenoids
Glyma.03G109000	M191T595_POS	-0.587532	0.0103491	ASPARTYL/LYSYL-TRNA SYNTHETASE // LYSINE--TRNA LIGASE	beta-Damascenone	Organic oxygen compounds	Organooxygen compounds	Carbonyl compounds
Glyma.03G109000	M193T806_POS	-0.574788	0.012588	ASPARTYL/LYSYL-TRNA SYNTHETASE // LYSINE--TRNA LIGASE	Vitispirane	Organoheterocyclic compounds	Tetrahydrofurans
Glyma.03G109000	M197T116_POS	-0.670015	0.0023478	ASPARTYL/LYSYL-TRNA SYNTHETASE // LYSINE--TRNA LIGASE	3-(3,4-Dihydroxyphenyl)pyruvate	Benzenoids	Benzene and substituted derivatives	Phenylpyruvic acid derivatives
Glyma.03G109000	M199T446_POS	-0.639492	0.00426726	ASPARTYL/LYSYL-TRNA SYNTHETASE // LYSINE--TRNA LIGASE	Hercynine	Organic acids and derivatives	Carboxylic acids and derivatives	Amino acids, peptides, and analogues
Glyma.03G109000	M207T711_POS	-0.501587	0.0339389	ASPARTYL/LYSYL-TRNA SYNTHETASE // LYSINE--TRNA LIGASE	Etrogol	Benzenoids	Phenols	Tyrosols and derivatives
Glyma.03G109000	M209T604_POS	-0.547074	0.0187909	ASPARTYL/LYSYL-TRNA SYNTHETASE // LYSINE--TRNA LIGASE	alpha-Asarone	Benzenoids	Phenol ethers	Anisoles
Glyma.03G109000	M227T102_NEG	-0.617026	0.00637552	ASPARTYL/LYSYL-TRNA SYNTHETASE // LYSINE--TRNA LIGASE	(R)-2-(Phosphonomethyl)malate	Organic acids and derivatives	Hydroxy acids and derivatives	Short-chain hydroxy acids and derivatives
Glyma.03G109000	M227T108_POS	-0.532903	0.0227805	ASPARTYL/LYSYL-TRNA SYNTHETASE // LYSINE--TRNA LIGASE	Chorismate	Organic acids and derivatives	Carboxylic acids and derivatives	Dicarboxylic acids and derivatives
Glyma.03G109000	M245T359_POS	-0.532904	0.0227802	ASPARTYL/LYSYL-TRNA SYNTHETASE // LYSINE--TRNA LIGASE	(-)-Falcarinol	Lipids and lipid-like molecules	Fatty Acyls	Fatty alcohols
Glyma.03G109000	M247T932_POS	-0.577687	0.0120475	ASPARTYL/LYSYL-TRNA SYNTHETASE // LYSINE--TRNA LIGASE	Geranylhydroquinone	Lipids and lipid-like molecules	Prenol lipids	Quinone and hydroquinone lipids
Glyma.03G109000	M251T361_POS	-0.502608	0.0335192	ASPARTYL/LYSYL-TRNA SYNTHETASE // LYSINE--TRNA LIGASE	Samin	Organoheterocyclic compounds	Benzodioxoles
Glyma.03G109000	M252T98_POS	-0.641979	0.00407402	ASPARTYL/LYSYL-TRNA SYNTHETASE // LYSINE--TRNA LIGASE	Deoxyadenosine	Nucleosides, nucleotides, and analogues	Purine nucleosides	Purine 2'-deoxyribonucleosides
Glyma.03G109000	M256T599_POS	-0.57613	0.0123354	ASPARTYL/LYSYL-TRNA SYNTHETASE // LYSINE--TRNA LIGASE	L-Pyrrolysine	Organic acids and derivatives	Carboxylic acids and derivatives	Amino acids, peptides, and analogues
Glyma.03G109000	M257T148_NEG	-0.507071	0.0317306	ASPARTYL/LYSYL-TRNA SYNTHETASE // LYSINE--TRNA LIGASE	Northienamycin	Organoheterocyclic compounds	Lactams	Beta lactams
Glyma.03G109000	M257T69_2_POS	-0.586759	0.0104751	ASPARTYL/LYSYL-TRNA SYNTHETASE // LYSINE--TRNA LIGASE	Isoliquiritigenin	Phenylpropanoids and polyketides	Linear 1,3-diarylpropanoids	Chalcones and dihydrochalcones
Glyma.03G109000	M258T660_POS	-0.53362	0.0225638	ASPARTYL/LYSYL-TRNA SYNTHETASE // LYSINE--TRNA LIGASE	Norcraugsodine	Benzenoids	Phenols	Benzenediols
Glyma.03G109000	M261T70_NEG	-0.628879	0.0051779	ASPARTYL/LYSYL-TRNA SYNTHETASE // LYSINE--TRNA LIGASE	D-Mannitol 1-phosphate	Organic oxygen compounds	Organooxygen compounds	Carbohydrates and carbohydrate conjugates
Glyma.03G109000	M273T328_POS	0.602695	0.00811366	ASPARTYL/LYSYL-TRNA SYNTHETASE // LYSINE--TRNA LIGASE	Butein	Phenylpropanoids and polyketides	Linear 1,3-diarylpropanoids	Chalcones and dihydrochalcones
Glyma.03G109000	M273T639_POS	-0.556787	0.0163909	ASPARTYL/LYSYL-TRNA SYNTHETASE // LYSINE--TRNA LIGASE	Naringenin chalcone	Phenylpropanoids and polyketides	Linear 1,3-diarylpropanoids	Chalcones and dihydrochalcones
Glyma.03G109000	M291T743_POS	-0.555734	0.0166386	ASPARTYL/LYSYL-TRNA SYNTHETASE // LYSINE--TRNA LIGASE	Deoxy phytoprostane J1	Lipids and lipid-like molecules	Fatty Acyls	Eicosanoids
Glyma.03G109000	M306T151_POS	-0.559076	0.0158622	ASPARTYL/LYSYL-TRNA SYNTHETASE // LYSINE--TRNA LIGASE	6'-Oxolividamine	Organic oxygen compounds	Organooxygen compounds	Carbohydrates and carbohydrate conjugates
Glyma.03G109000	M309T220_NEG	-0.66217	0.00275457	ASPARTYL/LYSYL-TRNA SYNTHETASE // LYSINE--TRNA LIGASE	Feruloylmalic acid	Phenylpropanoids and polyketides	Cinnamic acids and derivatives	Hydroxycinnamic acids and derivatives
Glyma.03G109000	M319T453_POS	-0.590435	0.00988681	ASPARTYL/LYSYL-TRNA SYNTHETASE // LYSINE--TRNA LIGASE	[3aR-(3aalpha,4alpha,9aalpha,9bbeta)]-4-(Acetyloxy)-3,3a,4,5,9a,9b-hexahydro-9-(hydroxymethyl)-6-methyl-3-methylene-azuleno[4,5-b]furan-2,7-dione	Organoheterocyclic compounds	Lactones	Gamma butyrolactones
Glyma.03G109000	M319T495_2_POS	-0.597755	0.0087943	ASPARTYL/LYSYL-TRNA SYNTHETASE // LYSINE--TRNA LIGASE	myricetin
Glyma.03G109000	M321T683_POS	-0.518237	0.0275782	ASPARTYL/LYSYL-TRNA SYNTHETASE // LYSINE--TRNA LIGASE	MMV687706	Benzenoids	Benzene and substituted derivatives	Diphenylethers
Glyma.03G109000	M321T870_POS	-0.559234	0.0158262	ASPARTYL/LYSYL-TRNA SYNTHETASE // LYSINE--TRNA LIGASE	Anomallotusin
Glyma.03G109000	M323T538_POS	-0.513969	0.0291122	ASPARTYL/LYSYL-TRNA SYNTHETASE // LYSINE--TRNA LIGASE	N-((R)-Pantothenoyl)-L-cysteine	Organic acids and derivatives	Peptidomimetics	Hybrid peptides
Glyma.03G109000	M329T510_NEG	-0.505374	0.0324015	ASPARTYL/LYSYL-TRNA SYNTHETASE // LYSINE--TRNA LIGASE	Jasminoside A	Organic oxygen compounds	Organooxygen compounds	Carbohydrates and carbohydrate conjugates
Glyma.03G109000	M329T653_POS	-0.551265	0.0177236	ASPARTYL/LYSYL-TRNA SYNTHETASE // LYSINE--TRNA LIGASE	2,3-Dinor-8-iso prostaglandin F1alpha	Lipids and lipid-like molecules	Fatty Acyls	Eicosanoids
Glyma.03G109000	M329T783_POS	-0.524056	0.0255886	ASPARTYL/LYSYL-TRNA SYNTHETASE // LYSINE--TRNA LIGASE	(4Z,7Z,10Z,13Z,16Z,19Z)-Docosahexaenoic acid	Lipids and lipid-like molecules	Fatty Acyls	Fatty acids and conjugates
Glyma.03G109000	M330T168_NEG	-0.582695	0.0111577	ASPARTYL/LYSYL-TRNA SYNTHETASE // LYSINE--TRNA LIGASE	Atalafoline	Organoheterocyclic compounds	Quinolines and derivatives	Benzoquinolines
Glyma.03G109000	M331T724_POS	-0.537846	0.0213199	ASPARTYL/LYSYL-TRNA SYNTHETASE // LYSINE--TRNA LIGASE	(7Z,10Z,13Z,16Z,19Z)-Docosapentaenoic acid	Lipids and lipid-like molecules	Fatty Acyls	Fatty acids and conjugates
Glyma.03G109000	M341T538_POS	-0.50359	0.0331191	ASPARTYL/LYSYL-TRNA SYNTHETASE // LYSINE--TRNA LIGASE	Desmethylxanthohumol	Phenylpropanoids and polyketides	Linear 1,3-diarylpropanoids	Chalcones and dihydrochalcones
Glyma.03G109000	M345T861_POS	-0.666462	0.00252543	ASPARTYL/LYSYL-TRNA SYNTHETASE // LYSINE--TRNA LIGASE	SB 205607	Organoheterocyclic compounds	Quinolines and derivatives	Phenylquinolines
Glyma.03G109000	M346T860_POS	-0.62437	0.00560978	ASPARTYL/LYSYL-TRNA SYNTHETASE // LYSINE--TRNA LIGASE	cyclic pyranopterin phosphate
Glyma.03G109000	M347T786_POS	-0.565801	0.0143869	ASPARTYL/LYSYL-TRNA SYNTHETASE // LYSINE--TRNA LIGASE	Corticosterone	Lipids and lipid-like molecules	Steroids and steroid derivatives	Hydroxysteroids
Glyma.03G109000	M357T217_POS	-0.644073	0.00391691	ASPARTYL/LYSYL-TRNA SYNTHETASE // LYSINE--TRNA LIGASE	5-Amino-6-(5'-phospho-D-ribitylamino)uracil	Organic oxygen compounds	Organooxygen compounds	Carbohydrates and carbohydrate conjugates
Glyma.03G109000	M357T481_POS	-0.507204	0.0316782	ASPARTYL/LYSYL-TRNA SYNTHETASE // LYSINE--TRNA LIGASE	Norsolorinic acid anthrone	Benzenoids	Anthracenes	NA
Glyma.03G109000	M357T605_POS	-0.550598	0.0178902	ASPARTYL/LYSYL-TRNA SYNTHETASE // LYSINE--TRNA LIGASE	Pluviatilol	Lignans, neolignans and related compounds	Furanoid lignans
Glyma.03G109000	M370T364_POS	-0.56768	0.0139948	ASPARTYL/LYSYL-TRNA SYNTHETASE // LYSINE--TRNA LIGASE	Grandisinine	Organoheterocyclic compounds	Quinolines and derivatives	Benzoquinolines
Glyma.03G109000	M371T539_NEG	-0.54035	0.0206089	ASPARTYL/LYSYL-TRNA SYNTHETASE // LYSINE--TRNA LIGASE	Biocytin	Organoheterocyclic compounds	Biotin and derivatives	NA
Glyma.03G109000	M374T190_POS	-0.579808	0.011664	ASPARTYL/LYSYL-TRNA SYNTHETASE // LYSINE--TRNA LIGASE	DIMBOA glucoside	Organic oxygen compounds	Organooxygen compounds	Carbohydrates and carbohydrate conjugates
Glyma.03G109000	M377T346_POS	-0.621959	0.00585243	ASPARTYL/LYSYL-TRNA SYNTHETASE // LYSINE--TRNA LIGASE	Riboflavin	Organoheterocyclic compounds	Pteridines and derivatives	Alloxazines and isoalloxazines
Glyma.03G109000	M427T460_POS	-0.551261	0.0177247	ASPARTYL/LYSYL-TRNA SYNTHETASE // LYSINE--TRNA LIGASE	dZDP
Glyma.03G109000	M435T443_NEG	-0.584054	0.0109256	ASPARTYL/LYSYL-TRNA SYNTHETASE // LYSINE--TRNA LIGASE	Homomangiferin	Organoheterocyclic compounds	Benzopyrans	1-benzopyrans
Glyma.03G109000	M458T565_NEG	-0.612892	0.00684251	ASPARTYL/LYSYL-TRNA SYNTHETASE // LYSINE--TRNA LIGASE	Deoxytubulosine	Alkaloids and derivatives	Harmala alkaloids	NA
Glyma.03G109000	M459T515_POS	-0.629344	0.0051349	ASPARTYL/LYSYL-TRNA SYNTHETASE // LYSINE--TRNA LIGASE	Gallocatechin 3-O-gallate	Phenylpropanoids and polyketides	Flavonoids	Flavans
Glyma.03G109000	M463T486_POS	-0.513866	0.02915	ASPARTYL/LYSYL-TRNA SYNTHETASE // LYSINE--TRNA LIGASE	Peonidin-3-O-beta-galactoside	Phenylpropanoids and polyketides	Flavonoids	Flavonoid glycosides
Glyma.03G109000	M519T598_POS	-0.526137	0.0249051	ASPARTYL/LYSYL-TRNA SYNTHETASE // LYSINE--TRNA LIGASE	Gossypol	Lipids and lipid-like molecules	Prenol lipids	Sesquiterpenoids
Glyma.03G109000	M545T512_POS	-0.556049	0.0165643	ASPARTYL/LYSYL-TRNA SYNTHETASE // LYSINE--TRNA LIGASE	10-Deacetylbaccatin III	Lipids and lipid-like molecules	Prenol lipids	Diterpenoids
Glyma.03G109000	M576T701_NEG	0.505086	0.0325167	ASPARTYL/LYSYL-TRNA SYNTHETASE // LYSINE--TRNA LIGASE	phosphoribulosylformimino-AICAR-phosphate
Glyma.03G109000	M595T512_POS	-0.536282	0.0217739	ASPARTYL/LYSYL-TRNA SYNTHETASE // LYSINE--TRNA LIGASE	Didymin	Phenylpropanoids and polyketides	Flavonoids	Flavonoid glycosides
Glyma.03G109000	M626T516_NEG	-0.633565	0.00475813	ASPARTYL/LYSYL-TRNA SYNTHETASE // LYSINE--TRNA LIGASE	Delphin
Glyma.03G109000	M627T658_POS	-0.550677	0.0178704	ASPARTYL/LYSYL-TRNA SYNTHETASE // LYSINE--TRNA LIGASE	Red chlorophyll catabolite	Organoheterocyclic compounds	Tetrapyrroles and derivatives	NA
Glyma.03G109000	M711T219_NEG	-0.638111	0.00437775	ASPARTYL/LYSYL-TRNA SYNTHETASE // LYSINE--TRNA LIGASE	Quercetin 3-(6''-malonylglucoside)-7-glucoside	Phenylpropanoids and polyketides	Flavonoids	Flavonoid glycosides
Glyma.03G109000	M723T627_NEG	-0.558069	0.0160931	ASPARTYL/LYSYL-TRNA SYNTHETASE // LYSINE--TRNA LIGASE	Torvonin A	Lipids and lipid-like molecules	Steroids and steroid derivatives	Steroidal glycosides
Glyma.03G109000	M754T503_NEG	-0.502522	0.0335541	ASPARTYL/LYSYL-TRNA SYNTHETASE // LYSINE--TRNA LIGASE	Rifamycin B	Phenylpropanoids and polyketides	Macrolactams	NA
Glyma.03G109000	M899T565_NEG	-0.593823	0.00936837	ASPARTYL/LYSYL-TRNA SYNTHETASE // LYSINE--TRNA LIGASE	Lyconoside Ib	Lipids and lipid-like molecules	Steroids and steroid derivatives	Steroidal glycosides
Glyma.03G109000	M911T711_POS	-0.502067	0.0337409	ASPARTYL/LYSYL-TRNA SYNTHETASE // LYSINE--TRNA LIGASE	Soyasaponin Bg	Lipids and lipid-like molecules	Prenol lipids	Terpene glycosides
Glyma.03G109000	M913T695_NEG	-0.564285	0.0147096	ASPARTYL/LYSYL-TRNA SYNTHETASE // LYSINE--TRNA LIGASE	Abutiloside H	Lipids and lipid-like molecules	Steroids and steroid derivatives	Steroidal glycosides
Glyma.03G109000	M955T622_NEG	-0.509401	0.0308264	ASPARTYL/LYSYL-TRNA SYNTHETASE // LYSINE--TRNA LIGASE	Betavulgaroside III	Lipids and lipid-like molecules	Prenol lipids	Terpene glycosides
Glyma.05G059500	M110T938_POS	-0.516587	0.0281634	ASPARAGINE--TRNA LIGASE, MITOCHONDRIAL	(S)-2-chloropropanoate
Glyma.05G059500	M151T762_POS	-0.555963	0.0165845	ASPARAGINE--TRNA LIGASE, MITOCHONDRIAL	Thymol	Lipids and lipid-like molecules	Prenol lipids	Monoterpenoids
Glyma.05G059500	M157T938_POS	-0.613608	0.0067598	ASPARAGINE--TRNA LIGASE, MITOCHONDRIAL	2-Phosphoglycolate	Organic acids and derivatives	Organic phosphoric acids and derivatives	Phosphate esters
Glyma.05G059500	M169T761_POS	-0.584145	0.0109103	ASPARAGINE--TRNA LIGASE, MITOCHONDRIAL	6-Hydroxy-2,6-dimethyl-2,7-octadien-4-one	Lipids and lipid-like molecules	Prenol lipids	Monoterpenoids
Glyma.05G059500	M191T595_POS	-0.741332	0.000430527	ASPARAGINE--TRNA LIGASE, MITOCHONDRIAL	beta-Damascenone	Organic oxygen compounds	Organooxygen compounds	Carbonyl compounds
Glyma.05G059500	M193T806_POS	-0.730108	0.000581558	ASPARAGINE--TRNA LIGASE, MITOCHONDRIAL	Vitispirane	Organoheterocyclic compounds	Tetrahydrofurans
Glyma.05G059500	M199T446_POS	-0.628599	0.0052039	ASPARAGINE--TRNA LIGASE, MITOCHONDRIAL	Hercynine	Organic acids and derivatives	Carboxylic acids and derivatives	Amino acids, peptides, and analogues
Glyma.05G059500	M209T604_POS	-0.627081	0.00534679	ASPARAGINE--TRNA LIGASE, MITOCHONDRIAL	alpha-Asarone	Benzenoids	Phenol ethers	Anisoles
Glyma.05G059500	M252T98_POS	-0.536342	0.0217564	ASPARAGINE--TRNA LIGASE, MITOCHONDRIAL	Deoxyadenosine	Nucleosides, nucleotides, and analogues	Purine nucleosides	Purine 2'-deoxyribonucleosides
Glyma.05G059500	M258T660_POS	-0.616018	0.00648696	ASPARAGINE--TRNA LIGASE, MITOCHONDRIAL	Norcraugsodine	Benzenoids	Phenols	Benzenediols
Glyma.05G059500	M269T661_POS	-0.532512	0.0228992	ASPARAGINE--TRNA LIGASE, MITOCHONDRIAL	1-Hydroxytorilolone	Lipids and lipid-like molecules	Prenol lipids	Sesquiterpenoids
Glyma.05G059500	M273T328_POS	0.506279	0.0320424	ASPARAGINE--TRNA LIGASE, MITOCHONDRIAL	Butein	Phenylpropanoids and polyketides	Linear 1,3-diarylpropanoids	Chalcones and dihydrochalcones
Glyma.05G059500	M273T639_POS	-0.616514	0.00643194	ASPARAGINE--TRNA LIGASE, MITOCHONDRIAL	Naringenin chalcone	Phenylpropanoids and polyketides	Linear 1,3-diarylpropanoids	Chalcones and dihydrochalcones
Glyma.05G059500	M277T796_POS	-0.507572	0.0315344	ASPARAGINE--TRNA LIGASE, MITOCHONDRIAL	Dehydrocrepenynic acid	Lipids and lipid-like molecules	Fatty Acyls	Fatty acids and conjugates
Glyma.05G059500	M291T743_POS	-0.581733	0.0113246	ASPARAGINE--TRNA LIGASE, MITOCHONDRIAL	Deoxy phytoprostane J1	Lipids and lipid-like molecules	Fatty Acyls	Eicosanoids
Glyma.05G059500	M303T840_NEG	0.553743	0.0171153	ASPARAGINE--TRNA LIGASE, MITOCHONDRIAL	Discadenine	Organic acids and derivatives	Carboxylic acids and derivatives	Amino acids, peptides, and analogues
Glyma.05G059500	M305T814_POS	-0.52891	0.0240163	ASPARAGINE--TRNA LIGASE, MITOCHONDRIAL	3-Acetoxy-9-heptadecene-4,6-diyn-8-ol.	Lipids and lipid-like molecules	Fatty Acyls	Fatty alcohol esters
Glyma.05G059500	M319T495_2_POS	-0.564699	0.0146209	ASPARAGINE--TRNA LIGASE, MITOCHONDRIAL	myricetin
Glyma.05G059500	M321T683_POS	-0.515272	0.0286371	ASPARAGINE--TRNA LIGASE, MITOCHONDRIAL	MMV687706	Benzenoids	Benzene and substituted derivatives	Diphenylethers
Glyma.05G059500	M329T783_POS	-0.507797	0.0314465	ASPARAGINE--TRNA LIGASE, MITOCHONDRIAL	(4Z,7Z,10Z,13Z,16Z,19Z)-Docosahexaenoic acid	Lipids and lipid-like molecules	Fatty Acyls	Fatty acids and conjugates
Glyma.05G059500	M331T724_POS	-0.600878	0.00835883	ASPARAGINE--TRNA LIGASE, MITOCHONDRIAL	(7Z,10Z,13Z,16Z,19Z)-Docosapentaenoic acid	Lipids and lipid-like molecules	Fatty Acyls	Fatty acids and conjugates
Glyma.05G059500	M345T861_POS	-0.534869	0.0221904	ASPARAGINE--TRNA LIGASE, MITOCHONDRIAL	SB 205607	Organoheterocyclic compounds	Quinolines and derivatives	Phenylquinolines
Glyma.05G059500	M347T786_POS	-0.661994	0.00276431	ASPARAGINE--TRNA LIGASE, MITOCHONDRIAL	Corticosterone	Lipids and lipid-like molecules	Steroids and steroid derivatives	Hydroxysteroids
Glyma.05G059500	M350T742_POS	-0.519229	0.0272306	ASPARAGINE--TRNA LIGASE, MITOCHONDRIAL	1-(2-carboxyphenylamino)-1-deoxy-D-ribulose 5-phosphate
Glyma.05G059500	M352T442_POS	-0.521744	0.0263653	ASPARAGINE--TRNA LIGASE, MITOCHONDRIAL	Rhizocticin A	Organic acids and derivatives	Carboxylic acids and derivatives	Amino acids, peptides, and analogues
Glyma.05G059500	M363T922_NEG	-0.655385	0.0031515	ASPARAGINE--TRNA LIGASE, MITOCHONDRIAL	XMP
Glyma.05G059500	M391T699_NEG	-0.538738	0.0210646	ASPARAGINE--TRNA LIGASE, MITOCHONDRIAL	5-O-Demethylnobiletin
Glyma.05G059500	M417T438_POS	-0.517022	0.0280081	ASPARAGINE--TRNA LIGASE, MITOCHONDRIAL	Daidzein-8-C-glucoside	Phenylpropanoids and polyketides	Isoflavonoids	Isoflavonoid C-glycosides
Glyma.05G059500	M426T439_NEG	-0.522526	0.0261004	ASPARAGINE--TRNA LIGASE, MITOCHONDRIAL	ADP group
Glyma.05G059500	M456T345_NEG	0.5742	0.0126998	ASPARAGINE--TRNA LIGASE, MITOCHONDRIAL	Amygdalin	Organic oxygen compounds	Organooxygen compounds	Carbohydrates and carbohydrate conjugates
Glyma.05G059500	M663T414_NEG	-0.539028	0.0209818	ASPARAGINE--TRNA LIGASE, MITOCHONDRIAL	NAD+	Nucleosides, nucleotides, and analogues	(5'->5')-dinucleotides	NA
Glyma.05G224000	M1028T698_NEG	-0.561015	0.0154252	ASPARAGINE--TRNA LIGASE, MITOCHONDRIAL-RELATED	3-(4'O-Malonyl)Rha(1-2)Gal(1-2)GluA-Soyasaponenol B	Lipids and lipid-like molecules	Prenol lipids	Terpene glycosides
Glyma.05G224000	M1030T697_NEG	-0.563857	0.0148017	ASPARAGINE--TRNA LIGASE, MITOCHONDRIAL-RELATED	Solasodoside A	Lipids and lipid-like molecules	Steroids and steroid derivatives	Steroidal glycosides
Glyma.05G224000	M1031T697_NEG	-0.539715	0.0207873	ASPARAGINE--TRNA LIGASE, MITOCHONDRIAL-RELATED	Dehydrotomatine	Lipids and lipid-like molecules	Steroids and steroid derivatives	Steroidal glycosides
Glyma.05G224000	M1050T685_NEG	-0.507882	0.0314136	ASPARAGINE--TRNA LIGASE, MITOCHONDRIAL-RELATED	Solanigroside G	Lipids and lipid-like molecules	Steroids and steroid derivatives	Steroidal glycosides
Glyma.05G224000	M114T73_POS	0.586585	0.0105036	ASPARAGINE--TRNA LIGASE, MITOCHONDRIAL-RELATED	(S)-1-Pyrroline-5-carboxylate	Organic acids and derivatives	Carboxylic acids and derivatives	Amino acids, peptides, and analogues
Glyma.05G224000	M125T937_POS	0.557936	0.0161237	ASPARAGINE--TRNA LIGASE, MITOCHONDRIAL-RELATED	3-chloro-L-alanine
Glyma.05G224000	M138T295_POS	-0.691633	0.00147492	ASPARAGINE--TRNA LIGASE, MITOCHONDRIAL-RELATED	4-Aminobenzoate	Benzenoids	Benzene and substituted derivatives	Benzoic acids and derivatives
Glyma.05G224000	M151T762_POS	-0.633237	0.00478652	ASPARAGINE--TRNA LIGASE, MITOCHONDRIAL-RELATED	Thymol	Lipids and lipid-like molecules	Prenol lipids	Monoterpenoids
Glyma.05G224000	M169T761_POS	-0.676634	0.0020444	ASPARAGINE--TRNA LIGASE, MITOCHONDRIAL-RELATED	6-Hydroxy-2,6-dimethyl-2,7-octadien-4-one	Lipids and lipid-like molecules	Prenol lipids	Monoterpenoids
Glyma.05G224000	M171T390_NEG	-0.580062	0.0116187	ASPARAGINE--TRNA LIGASE, MITOCHONDRIAL-RELATED	1,4-Cyclohexanedicarboxylic acid	Organic acids and derivatives	Carboxylic acids and derivatives	Dicarboxylic acids and derivatives
Glyma.05G224000	M172T390_NEG	-0.585112	0.0107477	ASPARAGINE--TRNA LIGASE, MITOCHONDRIAL-RELATED	5-Guanidino-2-oxopentanoate	Organic acids and derivatives	Keto acids and derivatives	Short-chain keto acids and derivatives
Glyma.05G224000	M183T653_NEG	-0.525191	0.025214	ASPARAGINE--TRNA LIGASE, MITOCHONDRIAL-RELATED	3-Nonen-1-yl acetate	Lipids and lipid-like molecules	Fatty Acyls	Fatty alcohol esters
Glyma.05G224000	M187T1029_POS	0.640757	0.00416805	ASPARAGINE--TRNA LIGASE, MITOCHONDRIAL-RELATED	iodoacetate
Glyma.05G224000	M191T595_POS	-0.566897	0.0141573	ASPARAGINE--TRNA LIGASE, MITOCHONDRIAL-RELATED	beta-Damascenone	Organic oxygen compounds	Organooxygen compounds	Carbonyl compounds
Glyma.05G224000	M193T806_POS	-0.686169	0.00166478	ASPARAGINE--TRNA LIGASE, MITOCHONDRIAL-RELATED	Vitispirane	Organoheterocyclic compounds	Tetrahydrofurans
Glyma.05G224000	M199T446_POS	-0.668452	0.00242465	ASPARAGINE--TRNA LIGASE, MITOCHONDRIAL-RELATED	Hercynine	Organic acids and derivatives	Carboxylic acids and derivatives	Amino acids, peptides, and analogues
Glyma.05G224000	M201T74_POS	-0.508147	0.0313104	ASPARAGINE--TRNA LIGASE, MITOCHONDRIAL-RELATED	D-erythrose 4-phosphate
Glyma.05G224000	M207T711_POS	-0.664436	0.00263155	ASPARAGINE--TRNA LIGASE, MITOCHONDRIAL-RELATED	Etrogol	Benzenoids	Phenols	Tyrosols and derivatives
Glyma.05G224000	M209T604_POS	-0.537258	0.0214897	ASPARAGINE--TRNA LIGASE, MITOCHONDRIAL-RELATED	alpha-Asarone	Benzenoids	Phenol ethers	Anisoles
Glyma.05G224000	M221T67_POS	0.589695	0.010003	ASPARAGINE--TRNA LIGASE, MITOCHONDRIAL-RELATED	(5R)-Albaflavenol	Lipids and lipid-like molecules	Prenol lipids	Sesquiterpenoids
Glyma.05G224000	M223T710_NEG	-0.544395	0.0194994	ASPARAGINE--TRNA LIGASE, MITOCHONDRIAL-RELATED	(+)-7-Isomethyljasmonate	Lipids and lipid-like molecules	Fatty Acyls	Lineolic acids and derivatives
Glyma.05G224000	M232T70_NEG	-0.536454	0.0217237	ASPARAGINE--TRNA LIGASE, MITOCHONDRIAL-RELATED	2,3-Dihydro-3-hydroxy-3-methylthiazolo[3,2-a]indole-9-carboxaldehyde	Organoheterocyclic compounds	Indoles and derivatives	Indoles
Glyma.05G224000	M237T723_NEG	-0.500632	0.0343354	ASPARAGINE--TRNA LIGASE, MITOCHONDRIAL-RELATED	OPC-4:0	Organic oxygen compounds	Organooxygen compounds	Carbonyl compounds
Glyma.05G224000	M237T724_POS	-0.56256	0.0150836	ASPARAGINE--TRNA LIGASE, MITOCHONDRIAL-RELATED	Aubergenone	Lipids and lipid-like molecules	Prenol lipids	Sesquiterpenoids
Glyma.05G224000	M238T70_POS	-0.547942	0.0185658	ASPARAGINE--TRNA LIGASE, MITOCHONDRIAL-RELATED	S-succinylcysteine	Organic acids and derivatives	Carboxylic acids and derivatives	Amino acids, peptides, and analogues
Glyma.05G224000	M249T727_NEG	-0.52551	0.0251094	ASPARAGINE--TRNA LIGASE, MITOCHONDRIAL-RELATED	Viscic acid	Lipids and lipid-like molecules	Prenol lipids	Sesquiterpenoids
Glyma.05G224000	M252T98_POS	-0.697101	0.00130327	ASPARAGINE--TRNA LIGASE, MITOCHONDRIAL-RELATED	Deoxyadenosine	Nucleosides, nucleotides, and analogues	Purine nucleosides	Purine 2'-deoxyribonucleosides
Glyma.05G224000	M258T660_POS	-0.616776	0.00640305	ASPARAGINE--TRNA LIGASE, MITOCHONDRIAL-RELATED	Norcraugsodine	Benzenoids	Phenols	Benzenediols
Glyma.05G224000	M269T389_NEG	-0.595745	0.00908411	ASPARAGINE--TRNA LIGASE, MITOCHONDRIAL-RELATED	4',6,7-Trihydroxyisoflavone	Phenylpropanoids and polyketides	Isoflavonoids	Isoflav-2-enes
Glyma.05G224000	M273T639_POS	-0.591795	0.0096761	ASPARAGINE--TRNA LIGASE, MITOCHONDRIAL-RELATED	Naringenin chalcone	Phenylpropanoids and polyketides	Linear 1,3-diarylpropanoids	Chalcones and dihydrochalcones
Glyma.05G224000	M277T796_POS	-0.586573	0.0105057	ASPARAGINE--TRNA LIGASE, MITOCHONDRIAL-RELATED	Dehydrocrepenynic acid	Lipids and lipid-like molecules	Fatty Acyls	Fatty acids and conjugates
Glyma.05G224000	M287T811_POS	-0.644915	0.00385516	ASPARAGINE--TRNA LIGASE, MITOCHONDRIAL-RELATED	Retinol	Lipids and lipid-like molecules	Prenol lipids	Retinoids
Glyma.05G224000	M291T743_POS	-0.599256	0.00858283	ASPARAGINE--TRNA LIGASE, MITOCHONDRIAL-RELATED	Deoxy phytoprostane J1	Lipids and lipid-like molecules	Fatty Acyls	Eicosanoids
Glyma.05G224000	M293T661_POS	-0.50964	0.0307348	ASPARAGINE--TRNA LIGASE, MITOCHONDRIAL-RELATED	(9Z,15Z)-(13S)-12,13-Epoxyoctadeca-9,11,15-trienoic acid	Lipids and lipid-like molecules	Fatty Acyls	Fatty acids and conjugates
Glyma.05G224000	M295T796_POS	-0.579584	0.0117041	ASPARAGINE--TRNA LIGASE, MITOCHONDRIAL-RELATED	Colneleic acid	Lipids and lipid-like molecules	Fatty Acyls	Fatty acids and conjugates
Glyma.05G224000	M298T830_POS	-0.631988	0.00489614	ASPARAGINE--TRNA LIGASE, MITOCHONDRIAL-RELATED	N7-methylguanosine
Glyma.05G224000	M305T814_POS	-0.650061	0.0034948	ASPARAGINE--TRNA LIGASE, MITOCHONDRIAL-RELATED	3-Acetoxy-9-heptadecene-4,6-diyn-8-ol.	Lipids and lipid-like molecules	Fatty Acyls	Fatty alcohol esters
Glyma.05G224000	M313T734_NEG	-0.627885	0.00527065	ASPARAGINE--TRNA LIGASE, MITOCHONDRIAL-RELATED	12,13-DHOME	Lipids and lipid-like molecules	Fatty Acyls	Fatty acids and conjugates
Glyma.05G224000	M319T495_2_POS	-0.519187	0.0272452	ASPARAGINE--TRNA LIGASE, MITOCHONDRIAL-RELATED	myricetin
Glyma.05G224000	M321T683_POS	-0.548766	0.0183542	ASPARAGINE--TRNA LIGASE, MITOCHONDRIAL-RELATED	MMV687706	Benzenoids	Benzene and substituted derivatives	Diphenylethers
Glyma.05G224000	M321T870_POS	-0.561154	0.0153941	ASPARAGINE--TRNA LIGASE, MITOCHONDRIAL-RELATED	Anomallotusin
Glyma.05G224000	M322T702_NEG	-0.61653	0.00643019	ASPARAGINE--TRNA LIGASE, MITOCHONDRIAL-RELATED	(-)-Jasmonoyl-L-isoleucine	Organic acids and derivatives	Carboxylic acids and derivatives	Amino acids, peptides, and analogues
Glyma.05G224000	M329T653_POS	-0.573651	0.012805	ASPARAGINE--TRNA LIGASE, MITOCHONDRIAL-RELATED	2,3-Dinor-8-iso prostaglandin F1alpha	Lipids and lipid-like molecules	Fatty Acyls	Eicosanoids
Glyma.05G224000	M329T783_POS	-0.610632	0.00710933	ASPARAGINE--TRNA LIGASE, MITOCHONDRIAL-RELATED	(4Z,7Z,10Z,13Z,16Z,19Z)-Docosahexaenoic acid	Lipids and lipid-like molecules	Fatty Acyls	Fatty acids and conjugates
Glyma.05G224000	M331T724_POS	-0.742748	0.000414063	ASPARAGINE--TRNA LIGASE, MITOCHONDRIAL-RELATED	(7Z,10Z,13Z,16Z,19Z)-Docosapentaenoic acid	Lipids and lipid-like molecules	Fatty Acyls	Fatty acids and conjugates
Glyma.05G224000	M338T700_POS	-0.590947	0.00980703	ASPARAGINE--TRNA LIGASE, MITOCHONDRIAL-RELATED	5-Hydroxymethyldeoxycytidylate	Nucleosides, nucleotides, and analogues	Pyrimidine nucleotides	Pyrimidine deoxyribonucleotides
Glyma.05G224000	M345T861_POS	-0.595703	0.00909033	ASPARAGINE--TRNA LIGASE, MITOCHONDRIAL-RELATED	SB 205607	Organoheterocyclic compounds	Quinolines and derivatives	Phenylquinolines
Glyma.05G224000	M346T860_POS	-0.51549	0.0285581	ASPARAGINE--TRNA LIGASE, MITOCHONDRIAL-RELATED	cyclic pyranopterin phosphate
Glyma.05G224000	M347T786_POS	-0.756877	0.00027672	ASPARAGINE--TRNA LIGASE, MITOCHONDRIAL-RELATED	Corticosterone	Lipids and lipid-like molecules	Steroids and steroid derivatives	Hydroxysteroids
Glyma.05G224000	M349T687_POS	-0.623806	0.00566581	ASPARAGINE--TRNA LIGASE, MITOCHONDRIAL-RELATED	Gibberellin A111	Lipids and lipid-like molecules	Prenol lipids	Diterpenoids
Glyma.05G224000	M350T742_POS	-0.513647	0.0292305	ASPARAGINE--TRNA LIGASE, MITOCHONDRIAL-RELATED	1-(2-carboxyphenylamino)-1-deoxy-D-ribulose 5-phosphate
Glyma.05G224000	M363T922_NEG	-0.65535	0.00315364	ASPARAGINE--TRNA LIGASE, MITOCHONDRIAL-RELATED	XMP
Glyma.05G224000	M365T646_NEG	-0.528327	0.0242011	ASPARAGINE--TRNA LIGASE, MITOCHONDRIAL-RELATED	Ferulenol
Glyma.05G224000	M384T368_NEG	0.638443	0.00435099	ASPARAGINE--TRNA LIGASE, MITOCHONDRIAL-RELATED	Buntanmine A	Organoheterocyclic compounds	Quinolines and derivatives	Benzoquinolines
Glyma.05G224000	M391T699_NEG	-0.605075	0.00780119	ASPARAGINE--TRNA LIGASE, MITOCHONDRIAL-RELATED	5-O-Demethylnobiletin
Glyma.05G224000	M402T364_POS	0.548374	0.0184546	ASPARAGINE--TRNA LIGASE, MITOCHONDRIAL-RELATED	Moxifloxacin	Organoheterocyclic compounds	Quinolines and derivatives	Quinoline carboxylic acids
Glyma.05G224000	M457T870_POS	-0.585445	0.010692	ASPARAGINE--TRNA LIGASE, MITOCHONDRIAL-RELATED	Oleanolic acid	Lipids and lipid-like molecules	Prenol lipids	Triterpenoids
Glyma.05G224000	M479T363_NEG	-0.513145	0.0294158	ASPARAGINE--TRNA LIGASE, MITOCHONDRIAL-RELATED	Gossypetin 8-glucoside	Phenylpropanoids and polyketides	Flavonoids	Flavonoid glycosides
Glyma.05G224000	M613T608_NEG	-0.55348	0.0171791	ASPARAGINE--TRNA LIGASE, MITOCHONDRIAL-RELATED	Neomycin B	Organic oxygen compounds	Organooxygen compounds	Carbohydrates and carbohydrate conjugates
Glyma.05G224000	M640T413_POS	-0.505198	0.0324717	ASPARAGINE--TRNA LIGASE, MITOCHONDRIAL-RELATED	Demethyl-desacetyl-rifamycin S	Phenylpropanoids and polyketides	Macrolactams	NA
Glyma.05G224000	M663T682_POS	0.665282	0.00258677	ASPARAGINE--TRNA LIGASE, MITOCHONDRIAL-RELATED	Prosapogenin	Lipids and lipid-like molecules	Prenol lipids	Terpene glycosides
Glyma.05G224000	M883T701_NEG	-0.546781	0.0188676	ASPARAGINE--TRNA LIGASE, MITOCHONDRIAL-RELATED	Pennogenin 3-O-beta-chacotrioside	Lipids and lipid-like molecules	Steroids and steroid derivatives	Steroidal glycosides
Glyma.05G224000	M913T695_NEG	-0.577726	0.0120404	ASPARAGINE--TRNA LIGASE, MITOCHONDRIAL-RELATED	Abutiloside H	Lipids and lipid-like molecules	Steroids and steroid derivatives	Steroidal glycosides
Glyma.05G224000	M915T695_NEG	-0.561068	0.0154134	ASPARAGINE--TRNA LIGASE, MITOCHONDRIAL-RELATED	Abutiloside B	Lipids and lipid-like molecules	Steroids and steroid derivatives	Steroidal glycosides
Glyma.05G224000	M974T533_3_POS	-0.607466	0.0074971	ASPARAGINE--TRNA LIGASE, MITOCHONDRIAL-RELATED	Sinapoyl-CoA	Lipids and lipid-like molecules	Fatty Acyls	Fatty acyl thioesters
Glyma.05G236700	M104T65_NEG	-0.564704	0.01462	Aspartate--tRNA ligase / Aspartyl-tRNA synthetase	Serine	Organic acids and derivatives	Carboxylic acids and derivatives	Amino acids, peptides, and analogues
Glyma.05G236700	M106T70_POS	-0.637799	0.00440305	Aspartate--tRNA ligase / Aspartyl-tRNA synthetase	L-Serine	Organic acids and derivatives	Carboxylic acids and derivatives	Amino acids, peptides, and analogues
Glyma.05G236700	M113T68_NEG	-0.505001	0.0325504	Aspartate--tRNA ligase / Aspartyl-tRNA synthetase	2-Hydroxy-2,4-pentadienoate	Lipids and lipid-like molecules	Fatty Acyls	Fatty acids and conjugates
Glyma.05G236700	M130T68_POS	-0.546539	0.0189309	Aspartate--tRNA ligase / Aspartyl-tRNA synthetase	5-Oxoproline	Organic acids and derivatives	Carboxylic acids and derivatives	Amino acids, peptides, and analogues
Glyma.05G236700	M138T295_POS	-0.511557	0.0300079	Aspartate--tRNA ligase / Aspartyl-tRNA synthetase	4-Aminobenzoate	Benzenoids	Benzene and substituted derivatives	Benzoic acids and derivatives
Glyma.05G236700	M158T107_NEG	-0.564596	0.0146429	Aspartate--tRNA ligase / Aspartyl-tRNA synthetase	5-Acetamidopentanoate	Lipids and lipid-like molecules	Fatty Acyls	Fatty acids and conjugates
Glyma.05G236700	M169T761_POS	-0.566459	0.0142486	Aspartate--tRNA ligase / Aspartyl-tRNA synthetase	6-Hydroxy-2,6-dimethyl-2,7-octadien-4-one	Lipids and lipid-like molecules	Prenol lipids	Monoterpenoids
Glyma.05G236700	M185T66_POS	-0.564009	0.0147689	Aspartate--tRNA ligase / Aspartyl-tRNA synthetase	5-Hydroxyisourate	Organoheterocyclic compounds	Imidazopyrimidines	Purines and purine derivatives
Glyma.05G236700	M186T66_POS	-0.554719	0.0168802	Aspartate--tRNA ligase / Aspartyl-tRNA synthetase	2-Amino-3-carboxymuconate semialdehyde	Organic acids and derivatives	Carboxylic acids and derivatives	Amino acids, peptides, and analogues
Glyma.05G236700	M187T69_POS	-0.57632	0.0123	Aspartate--tRNA ligase / Aspartyl-tRNA synthetase	3-maleylpyruvate
Glyma.05G236700	M191T595_POS	-0.712428	0.0009081	Aspartate--tRNA ligase / Aspartyl-tRNA synthetase	beta-Damascenone	Organic oxygen compounds	Organooxygen compounds	Carbonyl compounds
Glyma.05G236700	M193T806_POS	-0.582861	0.0111292	Aspartate--tRNA ligase / Aspartyl-tRNA synthetase	Vitispirane	Organoheterocyclic compounds	Tetrahydrofurans
Glyma.05G236700	M199T446_POS	-0.507216	0.0316737	Aspartate--tRNA ligase / Aspartyl-tRNA synthetase	Hercynine	Organic acids and derivatives	Carboxylic acids and derivatives	Amino acids, peptides, and analogues
Glyma.05G236700	M201T74_POS	-0.696362	0.00132544	Aspartate--tRNA ligase / Aspartyl-tRNA synthetase	D-erythrose 4-phosphate
Glyma.05G236700	M205T928_NEG	0.565351	0.0144822	Aspartate--tRNA ligase / Aspartyl-tRNA synthetase	3-Oxalomalate	Organic acids and derivatives	Carboxylic acids and derivatives	Tricarboxylic acids and derivatives
Glyma.05G236700	M207T711_POS	-0.54554	0.0191942	Aspartate--tRNA ligase / Aspartyl-tRNA synthetase	Etrogol	Benzenoids	Phenols	Tyrosols and derivatives
Glyma.05G236700	M209T604_POS	-0.581298	0.0114005	Aspartate--tRNA ligase / Aspartyl-tRNA synthetase	alpha-Asarone	Benzenoids	Phenol ethers	Anisoles
Glyma.05G236700	M215T194_POS	-0.567034	0.0141288	Aspartate--tRNA ligase / Aspartyl-tRNA synthetase	Dethiobiotin	Lipids and lipid-like molecules	Fatty Acyls	Fatty acids and conjugates
Glyma.05G236700	M237T724_POS	-0.623902	0.00565629	Aspartate--tRNA ligase / Aspartyl-tRNA synthetase	Aubergenone	Lipids and lipid-like molecules	Prenol lipids	Sesquiterpenoids
Glyma.05G236700	M238T70_POS	-0.654874	0.00318323	Aspartate--tRNA ligase / Aspartyl-tRNA synthetase	S-succinylcysteine	Organic acids and derivatives	Carboxylic acids and derivatives	Amino acids, peptides, and analogues
Glyma.05G236700	M252T98_POS	-0.556181	0.0165331	Aspartate--tRNA ligase / Aspartyl-tRNA synthetase	Deoxyadenosine	Nucleosides, nucleotides, and analogues	Purine nucleosides	Purine 2'-deoxyribonucleosides
Glyma.05G236700	M258T660_POS	-0.591984	0.00964696	Aspartate--tRNA ligase / Aspartyl-tRNA synthetase	Norcraugsodine	Benzenoids	Phenols	Benzenediols
Glyma.05G236700	M269T389_NEG	-0.503209	0.0332737	Aspartate--tRNA ligase / Aspartyl-tRNA synthetase	4',6,7-Trihydroxyisoflavone	Phenylpropanoids and polyketides	Isoflavonoids	Isoflav-2-enes
Glyma.05G236700	M273T639_POS	-0.52813	0.0242636	Aspartate--tRNA ligase / Aspartyl-tRNA synthetase	Naringenin chalcone	Phenylpropanoids and polyketides	Linear 1,3-diarylpropanoids	Chalcones and dihydrochalcones
Glyma.05G236700	M277T796_POS	-0.553255	0.0172337	Aspartate--tRNA ligase / Aspartyl-tRNA synthetase	Dehydrocrepenynic acid	Lipids and lipid-like molecules	Fatty Acyls	Fatty acids and conjugates
Glyma.05G236700	M279T781_POS	-0.574291	0.0126825	Aspartate--tRNA ligase / Aspartyl-tRNA synthetase	?-linolenic acid	Lipids and lipid-like molecules	Fatty Acyls	Lineolic acids and derivatives
Glyma.05G236700	M287T811_POS	-0.593293	0.00944809	Aspartate--tRNA ligase / Aspartyl-tRNA synthetase	Retinol	Lipids and lipid-like molecules	Prenol lipids	Retinoids
Glyma.05G236700	M288T742_POS	-0.55511	0.0167869	Aspartate--tRNA ligase / Aspartyl-tRNA synthetase	Lauryl diethanolamide	Lipids and lipid-like molecules	Fatty Acyls	Fatty amides
Glyma.05G236700	M291T743_POS	-0.525188	0.0252149	Aspartate--tRNA ligase / Aspartyl-tRNA synthetase	Deoxy phytoprostane J1	Lipids and lipid-like molecules	Fatty Acyls	Eicosanoids
Glyma.05G236700	M295T796_POS	-0.542491	0.0200156	Aspartate--tRNA ligase / Aspartyl-tRNA synthetase	Colneleic acid	Lipids and lipid-like molecules	Fatty Acyls	Fatty acids and conjugates
Glyma.05G236700	M298T830_POS	-0.501119	0.0341328	Aspartate--tRNA ligase / Aspartyl-tRNA synthetase	N7-methylguanosine
Glyma.05G236700	M303T888_POS	-0.598468	0.00869329	Aspartate--tRNA ligase / Aspartyl-tRNA synthetase	(3R,4R)-3-(6-hydroxy-1,3-benzodioxol-5-yl)-3,4-dihydro-2H-chromene-4,7-diol
Glyma.05G236700	M305T814_POS	-0.618122	0.00625624	Aspartate--tRNA ligase / Aspartyl-tRNA synthetase	3-Acetoxy-9-heptadecene-4,6-diyn-8-ol.	Lipids and lipid-like molecules	Fatty Acyls	Fatty alcohol esters
Glyma.05G236700	M313T734_NEG	-0.559792	0.0156996	Aspartate--tRNA ligase / Aspartyl-tRNA synthetase	12,13-DHOME	Lipids and lipid-like molecules	Fatty Acyls	Fatty acids and conjugates
Glyma.05G236700	M321T683_POS	-0.507985	0.0313736	Aspartate--tRNA ligase / Aspartyl-tRNA synthetase	MMV687706	Benzenoids	Benzene and substituted derivatives	Diphenylethers
Glyma.05G236700	M321T870_POS	-0.581395	0.0113835	Aspartate--tRNA ligase / Aspartyl-tRNA synthetase	Anomallotusin
Glyma.05G236700	M322T702_NEG	-0.521597	0.0264152	Aspartate--tRNA ligase / Aspartyl-tRNA synthetase	(-)-Jasmonoyl-L-isoleucine	Organic acids and derivatives	Carboxylic acids and derivatives	Amino acids, peptides, and analogues
Glyma.05G236700	M329T783_POS	-0.52168	0.026387	Aspartate--tRNA ligase / Aspartyl-tRNA synthetase	(4Z,7Z,10Z,13Z,16Z,19Z)-Docosahexaenoic acid	Lipids and lipid-like molecules	Fatty Acyls	Fatty acids and conjugates
Glyma.05G236700	M331T724_POS	-0.570547	0.013413	Aspartate--tRNA ligase / Aspartyl-tRNA synthetase	(7Z,10Z,13Z,16Z,19Z)-Docosapentaenoic acid	Lipids and lipid-like molecules	Fatty Acyls	Fatty acids and conjugates
Glyma.05G236700	M336T913_POS	-0.581115	0.0114326	Aspartate--tRNA ligase / Aspartyl-tRNA synthetase	N4-(beta-N-acetyl-D-glucosaminyl)-L-asparagine
Glyma.05G236700	M338T700_POS	-0.658804	0.00294598	Aspartate--tRNA ligase / Aspartyl-tRNA synthetase	5-Hydroxymethyldeoxycytidylate	Nucleosides, nucleotides, and analogues	Pyrimidine nucleotides	Pyrimidine deoxyribonucleotides
Glyma.05G236700	M347T786_POS	-0.78977	9.68135e-05	Aspartate--tRNA ligase / Aspartyl-tRNA synthetase	Corticosterone	Lipids and lipid-like molecules	Steroids and steroid derivatives	Hydroxysteroids
Glyma.05G236700	M363T910_POS	-0.594953	0.00920047	Aspartate--tRNA ligase / Aspartyl-tRNA synthetase	3,6,9,12-Tetraoxatetracosan-1-ol	Organic oxygen compounds	Organooxygen compounds	Ethers
Glyma.05G236700	M363T922_NEG	-0.777603	0.000145676	Aspartate--tRNA ligase / Aspartyl-tRNA synthetase	XMP
Glyma.05G236700	M391T699_NEG	-0.709111	0.000983784	Aspartate--tRNA ligase / Aspartyl-tRNA synthetase	5-O-Demethylnobiletin
Glyma.05G236700	M430T906_POS	-0.601821	0.00823091	Aspartate--tRNA ligase / Aspartyl-tRNA synthetase	15alpha-Hydroxysolasodine	Lipids and lipid-like molecules	Steroids and steroid derivatives	Steroidal alkaloids
Glyma.05G236700	M461T439_NEG	-0.536197	0.0217987	Aspartate--tRNA ligase / Aspartyl-tRNA synthetase	gamma-L-Glutamyl-S-(hercyn-2-yl)-L-cysteine S-oxide	Organic acids and derivatives	Carboxylic acids and derivatives	Amino acids, peptides, and analogues
Glyma.05G236700	M471T243_NEG	-0.606871	0.00757188	Aspartate--tRNA ligase / Aspartyl-tRNA synthetase	Hassmarin	Phenylpropanoids and polyketides	Coumarins and derivatives	Pyranocoumarins
Glyma.05G236700	M613T608_NEG	-0.501414	0.0340103	Aspartate--tRNA ligase / Aspartyl-tRNA synthetase	Neomycin B	Organic oxygen compounds	Organooxygen compounds	Carbohydrates and carbohydrate conjugates
Glyma.05G236700	M640T413_POS	-0.644375	0.0038947	Aspartate--tRNA ligase / Aspartyl-tRNA synthetase	Demethyl-desacetyl-rifamycin S	Phenylpropanoids and polyketides	Macrolactams	NA
Glyma.05G236700	M663T414_NEG	-0.561781	0.015255	Aspartate--tRNA ligase / Aspartyl-tRNA synthetase	NAD+	Nucleosides, nucleotides, and analogues	(5'->5')-dinucleotides	NA
Glyma.05G236700	M663T682_POS	0.519236	0.0272282	Aspartate--tRNA ligase / Aspartyl-tRNA synthetase	Prosapogenin	Lipids and lipid-like molecules	Prenol lipids	Terpene glycosides
Glyma.05G236700	M90T68_POS	-0.532596	0.0228737	Aspartate--tRNA ligase / Aspartyl-tRNA synthetase	beta-Alanine	Organic acids and derivatives	Carboxylic acids and derivatives	Amino acids, peptides, and analogues
Glyma.05G236700	M974T533_3_POS	-0.649337	0.00354381	Aspartate--tRNA ligase / Aspartyl-tRNA synthetase	Sinapoyl-CoA	Lipids and lipid-like molecules	Fatty Acyls	Fatty acyl thioesters
Glyma.05G240000	M104T65_NEG	-0.521931	0.0263017	aspartyl-tRNA(Asn)/glutamyl-tRNA(Gln) amidotransferase subunit B (gatB, PET112)	Serine	Organic acids and derivatives	Carboxylic acids and derivatives	Amino acids, peptides, and analogues
Glyma.05G240000	M106T70_POS	-0.551086	0.0177681	aspartyl-tRNA(Asn)/glutamyl-tRNA(Gln) amidotransferase subunit B (gatB, PET112)	L-Serine	Organic acids and derivatives	Carboxylic acids and derivatives	Amino acids, peptides, and analogues
Glyma.05G240000	M130T68_POS	-0.535129	0.0221134	aspartyl-tRNA(Asn)/glutamyl-tRNA(Gln) amidotransferase subunit B (gatB, PET112)	5-Oxoproline	Organic acids and derivatives	Carboxylic acids and derivatives	Amino acids, peptides, and analogues
Glyma.05G240000	M142T389_POS	-0.528605	0.0241128	aspartyl-tRNA(Asn)/glutamyl-tRNA(Gln) amidotransferase subunit B (gatB, PET112)	Pseudotropine	Alkaloids and derivatives	Tropane alkaloids
Glyma.05G240000	M142T67_POS	-0.508304	0.0312497	aspartyl-tRNA(Asn)/glutamyl-tRNA(Gln) amidotransferase subunit B (gatB, PET112)	carbamoyl phosphate
Glyma.05G240000	M165T662_POS	-0.522648	0.0260593	aspartyl-tRNA(Asn)/glutamyl-tRNA(Gln) amidotransferase subunit B (gatB, PET112)	(6Z,8E)-6,8,10-Undecatrien-3-one	Organic oxygen compounds	Organooxygen compounds	Carbonyl compounds
Glyma.05G240000	M166T660_POS	-0.5187	0.0274156	aspartyl-tRNA(Asn)/glutamyl-tRNA(Gln) amidotransferase subunit B (gatB, PET112)	Hordenine	Benzenoids	Benzene and substituted derivatives	Phenethylamines
Glyma.05G240000	M170T389_POS	-0.551145	0.0177534	aspartyl-tRNA(Asn)/glutamyl-tRNA(Gln) amidotransferase subunit B (gatB, PET112)	N-dimethylethanolamine phosphate
Glyma.05G240000	M170T72_POS	-0.509202	0.0309029	aspartyl-tRNA(Asn)/glutamyl-tRNA(Gln) amidotransferase subunit B (gatB, PET112)	L-Noradrenaline	Benzenoids	Phenols	Benzenediols
Glyma.05G240000	M174T296_POS	-0.508981	0.0309881	aspartyl-tRNA(Asn)/glutamyl-tRNA(Gln) amidotransferase subunit B (gatB, PET112)	Swainsonine	Organoheterocyclic compounds	Indolizidines	NA
Glyma.05G240000	M177T695_POS	-0.527452	0.0244804	aspartyl-tRNA(Asn)/glutamyl-tRNA(Gln) amidotransferase subunit B (gatB, PET112)	4-deoxy-L-threo-hex-4-enopyranuronate
Glyma.05G240000	M183T662_POS	-0.508949	0.0310003	aspartyl-tRNA(Asn)/glutamyl-tRNA(Gln) amidotransferase subunit B (gatB, PET112)	Methyl geranate	Lipids and lipid-like molecules	Prenol lipids	Monoterpenoids
Glyma.05G240000	M184T463_POS	-0.58572	0.0106464	aspartyl-tRNA(Asn)/glutamyl-tRNA(Gln) amidotransferase subunit B (gatB, PET112)	Acetylpseudotropine	Alkaloids and derivatives	Tropane alkaloids	NA
Glyma.05G240000	M186T66_POS	-0.520077	0.0269363	aspartyl-tRNA(Asn)/glutamyl-tRNA(Gln) amidotransferase subunit B (gatB, PET112)	2-Amino-3-carboxymuconate semialdehyde	Organic acids and derivatives	Carboxylic acids and derivatives	Amino acids, peptides, and analogues
Glyma.05G240000	M187T69_POS	-0.633138	0.00479512	aspartyl-tRNA(Asn)/glutamyl-tRNA(Gln) amidotransferase subunit B (gatB, PET112)	3-maleylpyruvate
Glyma.05G240000	M191T595_POS	-0.564271	0.0147126	aspartyl-tRNA(Asn)/glutamyl-tRNA(Gln) amidotransferase subunit B (gatB, PET112)	beta-Damascenone	Organic oxygen compounds	Organooxygen compounds	Carbonyl compounds
Glyma.05G240000	M201T74_POS	-0.613934	0.00672229	aspartyl-tRNA(Asn)/glutamyl-tRNA(Gln) amidotransferase subunit B (gatB, PET112)	D-erythrose 4-phosphate
Glyma.05G240000	M207T711_POS	-0.564061	0.0147578	aspartyl-tRNA(Asn)/glutamyl-tRNA(Gln) amidotransferase subunit B (gatB, PET112)	Etrogol	Benzenoids	Phenols	Tyrosols and derivatives
Glyma.05G240000	M216T376_NEG	-0.599541	0.00854314	aspartyl-tRNA(Asn)/glutamyl-tRNA(Gln) amidotransferase subunit B (gatB, PET112)	N-Acetyl-L-citrulline	Organic acids and derivatives	Carboxylic acids and derivatives	Amino acids, peptides, and analogues
Glyma.05G240000	M217T97_POS	-0.512078	0.0298124	aspartyl-tRNA(Asn)/glutamyl-tRNA(Gln) amidotransferase subunit B (gatB, PET112)	gamma-Glutamyl-gamma-aminobutyraldehyde	Organic acids and derivatives	Carboxylic acids and derivatives	Amino acids, peptides, and analogues
Glyma.05G240000	M220T282_POS	0.568361	0.0138549	aspartyl-tRNA(Asn)/glutamyl-tRNA(Gln) amidotransferase subunit B (gatB, PET112)	Pentahomomethionine	Organic acids and derivatives	Carboxylic acids and derivatives	Amino acids, peptides, and analogues
Glyma.05G240000	M235T732_POS	-0.687612	0.00161276	aspartyl-tRNA(Asn)/glutamyl-tRNA(Gln) amidotransferase subunit B (gatB, PET112)	Germacrene A acid	Lipids and lipid-like molecules	Prenol lipids	Sesquiterpenoids
Glyma.05G240000	M237T724_POS	-0.732141	0.000551323	aspartyl-tRNA(Asn)/glutamyl-tRNA(Gln) amidotransferase subunit B (gatB, PET112)	Aubergenone	Lipids and lipid-like molecules	Prenol lipids	Sesquiterpenoids
Glyma.05G240000	M238T70_POS	-0.58466	0.0108234	aspartyl-tRNA(Asn)/glutamyl-tRNA(Gln) amidotransferase subunit B (gatB, PET112)	S-succinylcysteine	Organic acids and derivatives	Carboxylic acids and derivatives	Amino acids, peptides, and analogues
Glyma.05G240000	M258T660_POS	-0.638833	0.00431972	aspartyl-tRNA(Asn)/glutamyl-tRNA(Gln) amidotransferase subunit B (gatB, PET112)	Norcraugsodine	Benzenoids	Phenols	Benzenediols
Glyma.05G240000	M273T349_POS	-0.519024	0.0273021	aspartyl-tRNA(Asn)/glutamyl-tRNA(Gln) amidotransferase subunit B (gatB, PET112)	Galaxolidone	Organoheterocyclic compounds	Benzopyrans	2-benzopyrans
Glyma.05G240000	M277T796_POS	-0.508724	0.0310871	aspartyl-tRNA(Asn)/glutamyl-tRNA(Gln) amidotransferase subunit B (gatB, PET112)	Dehydrocrepenynic acid	Lipids and lipid-like molecules	Fatty Acyls	Fatty acids and conjugates
Glyma.05G240000	M287T811_POS	-0.612756	0.00685833	aspartyl-tRNA(Asn)/glutamyl-tRNA(Gln) amidotransferase subunit B (gatB, PET112)	Retinol	Lipids and lipid-like molecules	Prenol lipids	Retinoids
Glyma.05G240000	M288T742_POS	-0.633253	0.00478514	aspartyl-tRNA(Asn)/glutamyl-tRNA(Gln) amidotransferase subunit B (gatB, PET112)	Lauryl diethanolamide	Lipids and lipid-like molecules	Fatty Acyls	Fatty amides
Glyma.05G240000	M293T661_POS	-0.503127	0.033307	aspartyl-tRNA(Asn)/glutamyl-tRNA(Gln) amidotransferase subunit B (gatB, PET112)	(9Z,15Z)-(13S)-12,13-Epoxyoctadeca-9,11,15-trienoic acid	Lipids and lipid-like molecules	Fatty Acyls	Fatty acids and conjugates
Glyma.05G240000	M298T830_POS	-0.715396	0.000844548	aspartyl-tRNA(Asn)/glutamyl-tRNA(Gln) amidotransferase subunit B (gatB, PET112)	N7-methylguanosine
Glyma.05G240000	M303T888_POS	-0.533651	0.0225545	aspartyl-tRNA(Asn)/glutamyl-tRNA(Gln) amidotransferase subunit B (gatB, PET112)	(3R,4R)-3-(6-hydroxy-1,3-benzodioxol-5-yl)-3,4-dihydro-2H-chromene-4,7-diol
Glyma.05G240000	M305T814_POS	-0.502437	0.033589	aspartyl-tRNA(Asn)/glutamyl-tRNA(Gln) amidotransferase subunit B (gatB, PET112)	3-Acetoxy-9-heptadecene-4,6-diyn-8-ol.	Lipids and lipid-like molecules	Fatty Acyls	Fatty alcohol esters
Glyma.05G240000	M307T108_NEG	-0.574721	0.0126006	aspartyl-tRNA(Asn)/glutamyl-tRNA(Gln) amidotransferase subunit B (gatB, PET112)	(R)-5-Diphosphomevalonate	Organic oxygen compounds	Organic oxoanionic compounds	Organic pyrophosphates
Glyma.05G240000	M334T267_POS	0.561856	0.0152386	aspartyl-tRNA(Asn)/glutamyl-tRNA(Gln) amidotransferase subunit B (gatB, PET112)	Oryzamutaic acid B	Organoheterocyclic compounds	Diazanaphthalenes	Naphthyridines
Glyma.05G240000	M336T913_POS	-0.51951	0.027133	aspartyl-tRNA(Asn)/glutamyl-tRNA(Gln) amidotransferase subunit B (gatB, PET112)	N4-(beta-N-acetyl-D-glucosaminyl)-L-asparagine
Glyma.05G240000	M347T786_POS	-0.665837	0.00255778	aspartyl-tRNA(Asn)/glutamyl-tRNA(Gln) amidotransferase subunit B (gatB, PET112)	Corticosterone	Lipids and lipid-like molecules	Steroids and steroid derivatives	Hydroxysteroids
Glyma.05G240000	M363T910_POS	-0.538624	0.021097	aspartyl-tRNA(Asn)/glutamyl-tRNA(Gln) amidotransferase subunit B (gatB, PET112)	3,6,9,12-Tetraoxatetracosan-1-ol	Organic oxygen compounds	Organooxygen compounds	Ethers
Glyma.05G240000	M363T922_NEG	-0.710881	0.000942776	aspartyl-tRNA(Asn)/glutamyl-tRNA(Gln) amidotransferase subunit B (gatB, PET112)	XMP
Glyma.05G240000	M374T151_POS	-0.526838	0.0246782	aspartyl-tRNA(Asn)/glutamyl-tRNA(Gln) amidotransferase subunit B (gatB, PET112)	N-Acetylmuramic acid 6-phosphate	Organic oxygen compounds	Organooxygen compounds	Carbohydrates and carbohydrate conjugates
Glyma.05G240000	M383T829_POS	-0.560651	0.0155064	aspartyl-tRNA(Asn)/glutamyl-tRNA(Gln) amidotransferase subunit B (gatB, PET112)	Histamine-trifluoromethyltoluide	Benzenoids	Benzene and substituted derivatives	Trifluoromethylbenzenes
Glyma.05G240000	M391T699_NEG	-0.507266	0.0316541	aspartyl-tRNA(Asn)/glutamyl-tRNA(Gln) amidotransferase subunit B (gatB, PET112)	5-O-Demethylnobiletin
Glyma.05G240000	M405T811_POS	-0.512511	0.0296509	aspartyl-tRNA(Asn)/glutamyl-tRNA(Gln) amidotransferase subunit B (gatB, PET112)	5?-CHOLANIC ACID-3?-OL-6_7-DIONE	Lipids and lipid-like molecules	Steroids and steroid derivatives	Bile acids, alcohols and derivatives
Glyma.05G240000	M426T439_NEG	-0.540551	0.0205526	aspartyl-tRNA(Asn)/glutamyl-tRNA(Gln) amidotransferase subunit B (gatB, PET112)	ADP group
Glyma.05G240000	M430T906_POS	-0.511624	0.0299828	aspartyl-tRNA(Asn)/glutamyl-tRNA(Gln) amidotransferase subunit B (gatB, PET112)	15alpha-Hydroxysolasodine	Lipids and lipid-like molecules	Steroids and steroid derivatives	Steroidal alkaloids
Glyma.05G240000	M433T374_POS	-0.538426	0.0211535	aspartyl-tRNA(Asn)/glutamyl-tRNA(Gln) amidotransferase subunit B (gatB, PET112)	Apigenin-7-O-glucoside	Phenylpropanoids and polyketides	Flavonoids	Flavonoid glycosides
Glyma.05G240000	M471T243_NEG	-0.510327	0.0304729	aspartyl-tRNA(Asn)/glutamyl-tRNA(Gln) amidotransferase subunit B (gatB, PET112)	Hassmarin	Phenylpropanoids and polyketides	Coumarins and derivatives	Pyranocoumarins
Glyma.05G240000	M640T413_POS	-0.58234	0.0112191	aspartyl-tRNA(Asn)/glutamyl-tRNA(Gln) amidotransferase subunit B (gatB, PET112)	Demethyl-desacetyl-rifamycin S	Phenylpropanoids and polyketides	Macrolactams	NA
Glyma.05G240000	M90T68_POS	-0.600892	0.00835698	aspartyl-tRNA(Asn)/glutamyl-tRNA(Gln) amidotransferase subunit B (gatB, PET112)	beta-Alanine	Organic acids and derivatives	Carboxylic acids and derivatives	Amino acids, peptides, and analogues
Glyma.08G031100	M1046T649_NEG	-0.544449	0.0194851	ASPARAGINE--TRNA LIGASE, MITOCHONDRIAL-RELATED	Solanigroside H	Lipids and lipid-like molecules	Steroids and steroid derivatives	Steroidal glycosides
Glyma.08G031100	M123T168_POS	-0.686051	0.00166906	ASPARAGINE--TRNA LIGASE, MITOCHONDRIAL-RELATED	Benzoic acid	Benzenoids	Benzene and substituted derivatives	Benzoic acids and derivatives
Glyma.08G031100	M127T62_POS	-0.511739	0.0299395	ASPARAGINE--TRNA LIGASE, MITOCHONDRIAL-RELATED	thymine
Glyma.08G031100	M130T73_2_POS	-0.550071	0.0180226	ASPARAGINE--TRNA LIGASE, MITOCHONDRIAL-RELATED	DL-Pipecolinic acid	Organic acids and derivatives	Carboxylic acids and derivatives	Amino acids, peptides, and analogues
Glyma.08G031100	M137T538_POS	-0.52221	0.0262072	ASPARAGINE--TRNA LIGASE, MITOCHONDRIAL-RELATED	3,4-Dihydroxystyrene	Benzenoids	Phenols	Benzenediols
Glyma.08G031100	M151T119_NEG	-0.503094	0.0333205	ASPARAGINE--TRNA LIGASE, MITOCHONDRIAL-RELATED	Vanillin	Benzenoids	Phenols	Methoxyphenols
Glyma.08G031100	M165T216_POS	-0.562948	0.0149988	ASPARAGINE--TRNA LIGASE, MITOCHONDRIAL-RELATED	4-Coumarate	Phenylpropanoids and polyketides	Cinnamic acids and derivatives	Hydroxycinnamic acids and derivatives
Glyma.08G031100	M197T116_POS	-0.587838	0.0102996	ASPARAGINE--TRNA LIGASE, MITOCHONDRIAL-RELATED	3-(3,4-Dihydroxyphenyl)pyruvate	Benzenoids	Benzene and substituted derivatives	Phenylpyruvic acid derivatives
Glyma.08G031100	M218T408_NEG	-0.502361	0.0336202	ASPARAGINE--TRNA LIGASE, MITOCHONDRIAL-RELATED	4-amino-2-methyl-5-(phosphooxymethyl)pyrimidine
Glyma.08G031100	M221T67_POS	0.511361	0.0300817	ASPARAGINE--TRNA LIGASE, MITOCHONDRIAL-RELATED	(5R)-Albaflavenol	Lipids and lipid-like molecules	Prenol lipids	Sesquiterpenoids
Glyma.08G031100	M223T482_NEG	0.539547	0.0208349	ASPARAGINE--TRNA LIGASE, MITOCHONDRIAL-RELATED	Sinapic acid	Phenylpropanoids and polyketides	Cinnamic acids and derivatives	Hydroxycinnamic acids and derivatives
Glyma.08G031100	M227T102_NEG	-0.547615	0.0186505	ASPARAGINE--TRNA LIGASE, MITOCHONDRIAL-RELATED	(R)-2-(Phosphonomethyl)malate	Organic acids and derivatives	Hydroxy acids and derivatives	Short-chain hydroxy acids and derivatives
Glyma.08G031100	M247T932_POS	-0.624428	0.00560408	ASPARAGINE--TRNA LIGASE, MITOCHONDRIAL-RELATED	Geranylhydroquinone	Lipids and lipid-like molecules	Prenol lipids	Quinone and hydroquinone lipids
Glyma.08G031100	M251T361_POS	-0.521489	0.0264522	ASPARAGINE--TRNA LIGASE, MITOCHONDRIAL-RELATED	Samin	Organoheterocyclic compounds	Benzodioxoles
Glyma.08G031100	M261T70_NEG	-0.581265	0.0114063	ASPARAGINE--TRNA LIGASE, MITOCHONDRIAL-RELATED	D-Mannitol 1-phosphate	Organic oxygen compounds	Organooxygen compounds	Carbohydrates and carbohydrate conjugates
Glyma.08G031100	M289T360_NEG	-0.592049	0.009637	ASPARAGINE--TRNA LIGASE, MITOCHONDRIAL-RELATED	(+)-Epicatechin	Phenylpropanoids and polyketides	Flavonoids	Flavans
Glyma.08G031100	M295T417_NEG	-0.584413	0.0108649	ASPARAGINE--TRNA LIGASE, MITOCHONDRIAL-RELATED	Dehypoxanthine futalosine	Organic oxygen compounds	Organooxygen compounds	Carbonyl compounds
Glyma.08G031100	M296T64_POS	-0.554381	0.0169616	ASPARAGINE--TRNA LIGASE, MITOCHONDRIAL-RELATED	Aminoimidazole ribotide	Organic oxygen compounds	Organooxygen compounds	Carbohydrates and carbohydrate conjugates
Glyma.08G031100	M298T403_NEG	-0.528312	0.024206	ASPARAGINE--TRNA LIGASE, MITOCHONDRIAL-RELATED	Caffeoyl tyramine	Phenylpropanoids and polyketides	Cinnamic acids and derivatives	Hydroxycinnamic acids and derivatives
Glyma.08G031100	M300T916_POS	-0.573766	0.012783	ASPARAGINE--TRNA LIGASE, MITOCHONDRIAL-RELATED	D-erythro-sphingosine	Organic nitrogen compounds	Organonitrogen compounds	Amines
Glyma.08G031100	M306T216_NEG	0.637216	0.00445062	ASPARAGINE--TRNA LIGASE, MITOCHONDRIAL-RELATED	Lividamine	Organic oxygen compounds	Organooxygen compounds	Carbohydrates and carbohydrate conjugates
Glyma.08G031100	M309T220_NEG	-0.539706	0.02079	ASPARAGINE--TRNA LIGASE, MITOCHONDRIAL-RELATED	Feruloylmalic acid	Phenylpropanoids and polyketides	Cinnamic acids and derivatives	Hydroxycinnamic acids and derivatives
Glyma.08G031100	M319T453_POS	-0.578816	0.0118421	ASPARAGINE--TRNA LIGASE, MITOCHONDRIAL-RELATED	[3aR-(3aalpha,4alpha,9aalpha,9bbeta)]-4-(Acetyloxy)-3,3a,4,5,9a,9b-hexahydro-9-(hydroxymethyl)-6-methyl-3-methylene-azuleno[4,5-b]furan-2,7-dione	Organoheterocyclic compounds	Lactones	Gamma butyrolactones
Glyma.08G031100	M323T538_POS	-0.590265	0.00991351	ASPARAGINE--TRNA LIGASE, MITOCHONDRIAL-RELATED	N-((R)-Pantothenoyl)-L-cysteine	Organic acids and derivatives	Peptidomimetics	Hybrid peptides
Glyma.08G031100	M329T510_NEG	-0.606137	0.00766496	ASPARAGINE--TRNA LIGASE, MITOCHONDRIAL-RELATED	Jasminoside A	Organic oxygen compounds	Organooxygen compounds	Carbohydrates and carbohydrate conjugates
Glyma.08G031100	M330T168_NEG	-0.595647	0.00909849	ASPARAGINE--TRNA LIGASE, MITOCHONDRIAL-RELATED	Atalafoline	Organoheterocyclic compounds	Quinolines and derivatives	Benzoquinolines
Glyma.08G031100	M341T444_POS	-0.513776	0.0291831	ASPARAGINE--TRNA LIGASE, MITOCHONDRIAL-RELATED	Glyceollidin I	Phenylpropanoids and polyketides	Isoflavonoids	Furanoisoflavonoids
Glyma.08G031100	M341T538_POS	-0.596548	0.0089674	ASPARAGINE--TRNA LIGASE, MITOCHONDRIAL-RELATED	Desmethylxanthohumol	Phenylpropanoids and polyketides	Linear 1,3-diarylpropanoids	Chalcones and dihydrochalcones
Glyma.08G031100	M355T451_NEG	-0.51246	0.0296702	ASPARAGINE--TRNA LIGASE, MITOCHONDRIAL-RELATED	Gentiopicrin	Organic oxygen compounds	Organooxygen compounds	Carbohydrates and carbohydrate conjugates
Glyma.08G031100	M357T217_POS	-0.502478	0.0335725	ASPARAGINE--TRNA LIGASE, MITOCHONDRIAL-RELATED	5-Amino-6-(5'-phospho-D-ribitylamino)uracil	Organic oxygen compounds	Organooxygen compounds	Carbohydrates and carbohydrate conjugates
Glyma.08G031100	M357T455_NEG	-0.506004	0.032151	ASPARAGINE--TRNA LIGASE, MITOCHONDRIAL-RELATED	Dehydrodiconiferyl alcohol	Phenylpropanoids and polyketides	2-arylbenzofuran flavonoids
Glyma.08G031100	M357T481_POS	-0.571246	0.0132742	ASPARAGINE--TRNA LIGASE, MITOCHONDRIAL-RELATED	Norsolorinic acid anthrone	Benzenoids	Anthracenes	NA
Glyma.08G031100	M357T605_POS	-0.587917	0.0102869	ASPARAGINE--TRNA LIGASE, MITOCHONDRIAL-RELATED	Pluviatilol	Lignans, neolignans and related compounds	Furanoid lignans
Glyma.08G031100	M358T537_POS	-0.511018	0.0302108	ASPARAGINE--TRNA LIGASE, MITOCHONDRIAL-RELATED	p-chloromercuribenzoate
Glyma.08G031100	M359T442_POS	-0.519914	0.0269929	ASPARAGINE--TRNA LIGASE, MITOCHONDRIAL-RELATED	Matairesinol	Lignans, neolignans and related compounds	Furanoid lignans	Tetrahydrofuran lignans
Glyma.08G031100	M369T551_POS	-0.507776	0.0314549	ASPARAGINE--TRNA LIGASE, MITOCHONDRIAL-RELATED	9-O-Methylglyceofuran	Phenylpropanoids and polyketides	Isoflavonoids	Furanoisoflavonoids
Glyma.08G031100	M370T364_POS	-0.551905	0.0175648	ASPARAGINE--TRNA LIGASE, MITOCHONDRIAL-RELATED	Grandisinine	Organoheterocyclic compounds	Quinolines and derivatives	Benzoquinolines
Glyma.08G031100	M371T539_NEG	-0.628126	0.00524806	ASPARAGINE--TRNA LIGASE, MITOCHONDRIAL-RELATED	Biocytin	Organoheterocyclic compounds	Biotin and derivatives	NA
Glyma.08G031100	M375T507_POS	-0.556194	0.0165302	ASPARAGINE--TRNA LIGASE, MITOCHONDRIAL-RELATED	5,7,2',3',4'-Pentamethoxyflavanone	Phenylpropanoids and polyketides	Flavonoids	O-methylated flavonoids
Glyma.08G031100	M377T346_POS	-0.570251	0.0134723	ASPARAGINE--TRNA LIGASE, MITOCHONDRIAL-RELATED	Riboflavin	Organoheterocyclic compounds	Pteridines and derivatives	Alloxazines and isoalloxazines
Glyma.08G031100	M384T434_POS	-0.699073	0.00124559	ASPARAGINE--TRNA LIGASE, MITOCHONDRIAL-RELATED	Tolfenpyrad	Benzenoids	Benzene and substituted derivatives	Diphenylethers
Glyma.08G031100	M386T608_POS	-0.508808	0.0310546	ASPARAGINE--TRNA LIGASE, MITOCHONDRIAL-RELATED	Nocardicin G	Organic acids and derivatives	Carboxylic acids and derivatives	Amino acids, peptides, and analogues
Glyma.08G031100	M399T441_POS	-0.532863	0.0227926	ASPARAGINE--TRNA LIGASE, MITOCHONDRIAL-RELATED	S-(5'-Adenosyl)-L-methionine chloride	Nucleosides, nucleotides, and analogues	5'-deoxyribonucleosides	5'-deoxy-5'-thionucleosides
Glyma.08G031100	M400T186_POS	-0.516735	0.0281105	ASPARAGINE--TRNA LIGASE, MITOCHONDRIAL-RELATED	Colchicine	Hydrocarbon derivatives	Tropones	NA
Glyma.08G031100	M400T436_POS	-0.593808	0.00937057	ASPARAGINE--TRNA LIGASE, MITOCHONDRIAL-RELATED	Narcotoline	Alkaloids and derivatives	Phthalide isoquinolines	NA
Glyma.08G031100	M411T115_POS	-0.518331	0.027545	ASPARAGINE--TRNA LIGASE, MITOCHONDRIAL-RELATED	N1-p-Coumaroyl-N4-feruloylputrescine	Phenylpropanoids and polyketides	Cinnamic acids and derivatives	Hydroxycinnamic acids and derivatives
Glyma.08G031100	M421T437_NEG	-0.53134	0.023258	ASPARAGINE--TRNA LIGASE, MITOCHONDRIAL-RELATED	Crepidiaside A	Organic oxygen compounds	Organooxygen compounds	Carbohydrates and carbohydrate conjugates
Glyma.08G031100	M421T621_POS	-0.520342	0.0268449	ASPARAGINE--TRNA LIGASE, MITOCHONDRIAL-RELATED	Sesamoside	Organic oxygen compounds	Organooxygen compounds	Carbohydrates and carbohydrate conjugates
Glyma.08G031100	M427T380_NEG	-0.508746	0.0310787	ASPARAGINE--TRNA LIGASE, MITOCHONDRIAL-RELATED	(13S,14R)-1-Hydroxy-13-O-acetyl-N-methylcanadine	Alkaloids and derivatives	Protoberberine alkaloids and derivatives	NA
Glyma.08G031100	M459T515_POS	-0.561328	0.0153555	ASPARAGINE--TRNA LIGASE, MITOCHONDRIAL-RELATED	Gallocatechin 3-O-gallate	Phenylpropanoids and polyketides	Flavonoids	Flavans
Glyma.08G031100	M466T243_NEG	0.544336	0.0195152	ASPARAGINE--TRNA LIGASE, MITOCHONDRIAL-RELATED	dCTP
Glyma.08G031100	M476T408_NEG	-0.503068	0.0333312	ASPARAGINE--TRNA LIGASE, MITOCHONDRIAL-RELATED	19-Chloroproansamitocin	Phenylpropanoids and polyketides	Macrolactams	NA
Glyma.08G031100	M484T526_POS	-0.523253	0.0258564	ASPARAGINE--TRNA LIGASE, MITOCHONDRIAL-RELATED	Acrimarine M	Organoheterocyclic compounds	Quinolines and derivatives	Benzoquinolines
Glyma.08G031100	M511T438_POS	-0.543314	0.0197912	ASPARAGINE--TRNA LIGASE, MITOCHONDRIAL-RELATED	6',7'-Dihydroxybergamottin decanal acetal	Phenylpropanoids and polyketides	Coumarins and derivatives	Furanocoumarins
Glyma.08G031100	M517T555_NEG	-0.727857	0.000616649	ASPARAGINE--TRNA LIGASE, MITOCHONDRIAL-RELATED	Ciceritol	Organic oxygen compounds	Organooxygen compounds	Carbohydrates and carbohydrate conjugates
Glyma.08G031100	M519T598_POS	-0.552067	0.0175248	ASPARAGINE--TRNA LIGASE, MITOCHONDRIAL-RELATED	Gossypol	Lipids and lipid-like molecules	Prenol lipids	Sesquiterpenoids
Glyma.08G031100	M521T341_POS	-0.549382	0.0181972	ASPARAGINE--TRNA LIGASE, MITOCHONDRIAL-RELATED	Ichanexic acid	Lipids and lipid-like molecules	Prenol lipids	Terpene lactones
Glyma.08G031100	M533T523_NEG	-0.58902	0.0101101	ASPARAGINE--TRNA LIGASE, MITOCHONDRIAL-RELATED	N-Demethyl-desepoxymaytansinol	Phenylpropanoids and polyketides	Macrolactams	NA
Glyma.08G031100	M545T512_POS	-0.73677	0.000487359	ASPARAGINE--TRNA LIGASE, MITOCHONDRIAL-RELATED	10-Deacetylbaccatin III	Lipids and lipid-like molecules	Prenol lipids	Diterpenoids
Glyma.08G031100	M573T774_NEG	-0.532319	0.022958	ASPARAGINE--TRNA LIGASE, MITOCHONDRIAL-RELATED	Cucurbitacin A	Lipids and lipid-like molecules	Steroids and steroid derivatives	Cucurbitacins
Glyma.08G031100	M583T604_NEG	-0.533528	0.0225916	ASPARAGINE--TRNA LIGASE, MITOCHONDRIAL-RELATED	Magnesium protoporphyrin	Organoheterocyclic compounds	Tetrapyrroles and derivatives	Metallotetrapyrroles
Glyma.08G031100	M585T556_NEG	-0.576394	0.0122863	ASPARAGINE--TRNA LIGASE, MITOCHONDRIAL-RELATED	Baccatin III	Lipids and lipid-like molecules	Prenol lipids	Diterpenoids
Glyma.08G031100	M629T566_NEG	-0.528956	0.0240018	ASPARAGINE--TRNA LIGASE, MITOCHONDRIAL-RELATED	7(1)-Hydroxychlorophyllide a	Organoheterocyclic compounds	Tetrapyrroles and derivatives	Chlorins
Glyma.08G031100	M637T693_POS	-0.588502	0.0101927	ASPARAGINE--TRNA LIGASE, MITOCHONDRIAL-RELATED	Lanceolitol B7	Organic oxygen compounds	Organooxygen compounds	Carbohydrates and carbohydrate conjugates
Glyma.08G031100	M711T219_NEG	-0.573116	0.0129082	ASPARAGINE--TRNA LIGASE, MITOCHONDRIAL-RELATED	Quercetin 3-(6''-malonylglucoside)-7-glucoside	Phenylpropanoids and polyketides	Flavonoids	Flavonoid glycosides
Glyma.08G031100	M723T627_NEG	-0.531279	0.0232769	ASPARAGINE--TRNA LIGASE, MITOCHONDRIAL-RELATED	Torvonin A	Lipids and lipid-like molecules	Steroids and steroid derivatives	Steroidal glycosides
Glyma.08G031100	M754T503_NEG	-0.569617	0.0135998	ASPARAGINE--TRNA LIGASE, MITOCHONDRIAL-RELATED	Rifamycin B	Phenylpropanoids and polyketides	Macrolactams	NA
Glyma.08G031100	M807T369_POS	0.592259	0.00960493	ASPARAGINE--TRNA LIGASE, MITOCHONDRIAL-RELATED	Orizalanosterolide B	Lipids and lipid-like molecules	Prenol lipids	Terpene glycosides
Glyma.08G031100	M899T565_NEG	-0.510491	0.0304105	ASPARAGINE--TRNA LIGASE, MITOCHONDRIAL-RELATED	Lyconoside Ib	Lipids and lipid-like molecules	Steroids and steroid derivatives	Steroidal glycosides
Glyma.08G043900	M104T65_NEG	-0.584095	0.0109187	Aspartate--tRNA ligase / Aspartyl-tRNA synthetase	Serine	Organic acids and derivatives	Carboxylic acids and derivatives	Amino acids, peptides, and analogues
Glyma.08G043900	M105T714_POS	-0.500629	0.0343367	Aspartate--tRNA ligase / Aspartyl-tRNA synthetase	Styrene	Benzenoids	Benzene and substituted derivatives	Styrenes
Glyma.08G043900	M106T70_POS	-0.643328	0.00397222	Aspartate--tRNA ligase / Aspartyl-tRNA synthetase	L-Serine	Organic acids and derivatives	Carboxylic acids and derivatives	Amino acids, peptides, and analogues
Glyma.08G043900	M113T68_NEG	-0.545038	0.0193275	Aspartate--tRNA ligase / Aspartyl-tRNA synthetase	2-Hydroxy-2,4-pentadienoate	Lipids and lipid-like molecules	Fatty Acyls	Fatty acids and conjugates
Glyma.08G043900	M120T69_POS	-0.59573	0.00908626	Aspartate--tRNA ligase / Aspartyl-tRNA synthetase	Threonine	Organic acids and derivatives	Carboxylic acids and derivatives	Amino acids, peptides, and analogues
Glyma.08G043900	M123T63_POS	0.523787	0.025678	Aspartate--tRNA ligase / Aspartyl-tRNA synthetase	Polysulfide
Glyma.08G043900	M124T986_POS	-0.549651	0.0181289	Aspartate--tRNA ligase / Aspartyl-tRNA synthetase	Nicotinate	Organoheterocyclic compounds	Pyridines and derivatives	Pyridinecarboxylic acids and derivatives
Glyma.08G043900	M130T68_POS	-0.629452	0.00512499	Aspartate--tRNA ligase / Aspartyl-tRNA synthetase	5-Oxoproline	Organic acids and derivatives	Carboxylic acids and derivatives	Amino acids, peptides, and analogues
Glyma.08G043900	M138T295_POS	-0.535497	0.0220047	Aspartate--tRNA ligase / Aspartyl-tRNA synthetase	4-Aminobenzoate	Benzenoids	Benzene and substituted derivatives	Benzoic acids and derivatives
Glyma.08G043900	M147T69_POS	-0.517931	0.027686	Aspartate--tRNA ligase / Aspartyl-tRNA synthetase	L-Glutamine	Organic acids and derivatives	Carboxylic acids and derivatives	Amino acids, peptides, and analogues
Glyma.08G043900	M151T762_POS	-0.565099	0.0145357	Aspartate--tRNA ligase / Aspartyl-tRNA synthetase	Thymol	Lipids and lipid-like molecules	Prenol lipids	Monoterpenoids
Glyma.08G043900	M158T107_NEG	-0.598627	0.00867089	Aspartate--tRNA ligase / Aspartyl-tRNA synthetase	5-Acetamidopentanoate	Lipids and lipid-like molecules	Fatty Acyls	Fatty acids and conjugates
Glyma.08G043900	M169T761_POS	-0.628498	0.00521332	Aspartate--tRNA ligase / Aspartyl-tRNA synthetase	6-Hydroxy-2,6-dimethyl-2,7-octadien-4-one	Lipids and lipid-like molecules	Prenol lipids	Monoterpenoids
Glyma.08G043900	M171T390_NEG	-0.507174	0.0316903	Aspartate--tRNA ligase / Aspartyl-tRNA synthetase	1,4-Cyclohexanedicarboxylic acid	Organic acids and derivatives	Carboxylic acids and derivatives	Dicarboxylic acids and derivatives
Glyma.08G043900	M172T390_NEG	-0.529507	0.0238282	Aspartate--tRNA ligase / Aspartyl-tRNA synthetase	5-Guanidino-2-oxopentanoate	Organic acids and derivatives	Keto acids and derivatives	Short-chain keto acids and derivatives
Glyma.08G043900	M185T66_POS	-0.646902	0.00371258	Aspartate--tRNA ligase / Aspartyl-tRNA synthetase	5-Hydroxyisourate	Organoheterocyclic compounds	Imidazopyrimidines	Purines and purine derivatives
Glyma.08G043900	M186T66_POS	-0.663535	0.00267991	Aspartate--tRNA ligase / Aspartyl-tRNA synthetase	2-Amino-3-carboxymuconate semialdehyde	Organic acids and derivatives	Carboxylic acids and derivatives	Amino acids, peptides, and analogues
Glyma.08G043900	M187T69_POS	-0.587475	0.0103584	Aspartate--tRNA ligase / Aspartyl-tRNA synthetase	3-maleylpyruvate
Glyma.08G043900	M191T595_POS	-0.713519	0.000884284	Aspartate--tRNA ligase / Aspartyl-tRNA synthetase	beta-Damascenone	Organic oxygen compounds	Organooxygen compounds	Carbonyl compounds
Glyma.08G043900	M193T806_POS	-0.633002	0.00480699	Aspartate--tRNA ligase / Aspartyl-tRNA synthetase	Vitispirane	Organoheterocyclic compounds	Tetrahydrofurans
Glyma.08G043900	M199T446_POS	-0.549658	0.0181272	Aspartate--tRNA ligase / Aspartyl-tRNA synthetase	Hercynine	Organic acids and derivatives	Carboxylic acids and derivatives	Amino acids, peptides, and analogues
Glyma.08G043900	M201T74_POS	-0.802067	6.23217e-05	Aspartate--tRNA ligase / Aspartyl-tRNA synthetase	D-erythrose 4-phosphate
Glyma.08G043900	M207T711_POS	-0.643662	0.00394735	Aspartate--tRNA ligase / Aspartyl-tRNA synthetase	Etrogol	Benzenoids	Phenols	Tyrosols and derivatives
Glyma.08G043900	M209T604_POS	-0.68775	0.00160787	Aspartate--tRNA ligase / Aspartyl-tRNA synthetase	alpha-Asarone	Benzenoids	Phenol ethers	Anisoles
Glyma.08G043900	M215T194_POS	-0.599622	0.0085318	Aspartate--tRNA ligase / Aspartyl-tRNA synthetase	Dethiobiotin	Lipids and lipid-like molecules	Fatty Acyls	Fatty acids and conjugates
Glyma.08G043900	M217T97_POS	-0.529524	0.023823	Aspartate--tRNA ligase / Aspartyl-tRNA synthetase	gamma-Glutamyl-gamma-aminobutyraldehyde	Organic acids and derivatives	Carboxylic acids and derivatives	Amino acids, peptides, and analogues
Glyma.08G043900	M235T732_POS	-0.559591	0.0157453	Aspartate--tRNA ligase / Aspartyl-tRNA synthetase	Germacrene A acid	Lipids and lipid-like molecules	Prenol lipids	Sesquiterpenoids
Glyma.08G043900	M237T723_NEG	-0.516241	0.0282875	Aspartate--tRNA ligase / Aspartyl-tRNA synthetase	OPC-4:0	Organic oxygen compounds	Organooxygen compounds	Carbonyl compounds
Glyma.08G043900	M237T724_POS	-0.665056	0.00259868	Aspartate--tRNA ligase / Aspartyl-tRNA synthetase	Aubergenone	Lipids and lipid-like molecules	Prenol lipids	Sesquiterpenoids
Glyma.08G043900	M238T70_POS	-0.616704	0.00641096	Aspartate--tRNA ligase / Aspartyl-tRNA synthetase	S-succinylcysteine	Organic acids and derivatives	Carboxylic acids and derivatives	Amino acids, peptides, and analogues
Glyma.08G043900	M252T98_POS	-0.649731	0.00351709	Aspartate--tRNA ligase / Aspartyl-tRNA synthetase	Deoxyadenosine	Nucleosides, nucleotides, and analogues	Purine nucleosides	Purine 2'-deoxyribonucleosides
Glyma.08G043900	M258T660_POS	-0.611121	0.00705086	Aspartate--tRNA ligase / Aspartyl-tRNA synthetase	Norcraugsodine	Benzenoids	Phenols	Benzenediols
Glyma.08G043900	M269T389_NEG	-0.567058	0.0141237	Aspartate--tRNA ligase / Aspartyl-tRNA synthetase	4',6,7-Trihydroxyisoflavone	Phenylpropanoids and polyketides	Isoflavonoids	Isoflav-2-enes
Glyma.08G043900	M269T661_POS	-0.57581	0.0123952	Aspartate--tRNA ligase / Aspartyl-tRNA synthetase	1-Hydroxytorilolone	Lipids and lipid-like molecules	Prenol lipids	Sesquiterpenoids
Glyma.08G043900	M273T639_POS	-0.570834	0.0133558	Aspartate--tRNA ligase / Aspartyl-tRNA synthetase	Naringenin chalcone	Phenylpropanoids and polyketides	Linear 1,3-diarylpropanoids	Chalcones and dihydrochalcones
Glyma.08G043900	M277T796_POS	-0.629843	0.00508913	Aspartate--tRNA ligase / Aspartyl-tRNA synthetase	Dehydrocrepenynic acid	Lipids and lipid-like molecules	Fatty Acyls	Fatty acids and conjugates
Glyma.08G043900	M279T781_POS	-0.585189	0.0107348	Aspartate--tRNA ligase / Aspartyl-tRNA synthetase	?-linolenic acid	Lipids and lipid-like molecules	Fatty Acyls	Lineolic acids and derivatives
Glyma.08G043900	M287T811_POS	-0.570321	0.0134581	Aspartate--tRNA ligase / Aspartyl-tRNA synthetase	Retinol	Lipids and lipid-like molecules	Prenol lipids	Retinoids
Glyma.08G043900	M288T742_POS	-0.653296	0.00328276	Aspartate--tRNA ligase / Aspartyl-tRNA synthetase	Lauryl diethanolamide	Lipids and lipid-like molecules	Fatty Acyls	Fatty amides
Glyma.08G043900	M291T743_POS	-0.582826	0.0111353	Aspartate--tRNA ligase / Aspartyl-tRNA synthetase	Deoxy phytoprostane J1	Lipids and lipid-like molecules	Fatty Acyls	Eicosanoids
Glyma.08G043900	M295T796_POS	-0.603856	0.00795992	Aspartate--tRNA ligase / Aspartyl-tRNA synthetase	Colneleic acid	Lipids and lipid-like molecules	Fatty Acyls	Fatty acids and conjugates
Glyma.08G043900	M298T830_POS	-0.549216	0.0182394	Aspartate--tRNA ligase / Aspartyl-tRNA synthetase	N7-methylguanosine
Glyma.08G043900	M303T888_POS	-0.641834	0.0040851	Aspartate--tRNA ligase / Aspartyl-tRNA synthetase	(3R,4R)-3-(6-hydroxy-1,3-benzodioxol-5-yl)-3,4-dihydro-2H-chromene-4,7-diol
Glyma.08G043900	M305T814_POS	-0.660611	0.00284191	Aspartate--tRNA ligase / Aspartyl-tRNA synthetase	3-Acetoxy-9-heptadecene-4,6-diyn-8-ol.	Lipids and lipid-like molecules	Fatty Acyls	Fatty alcohol esters
Glyma.08G043900	M311T736_NEG	-0.501747	0.0338728	Aspartate--tRNA ligase / Aspartyl-tRNA synthetase	13-Hydroperoxyoctadecadienoic acid	Lipids and lipid-like molecules	Fatty Acyls	Lineolic acids and derivatives
Glyma.08G043900	M313T734_NEG	-0.537669	0.0213711	Aspartate--tRNA ligase / Aspartyl-tRNA synthetase	12,13-DHOME	Lipids and lipid-like molecules	Fatty Acyls	Fatty acids and conjugates
Glyma.08G043900	M321T683_POS	-0.590891	0.00981578	Aspartate--tRNA ligase / Aspartyl-tRNA synthetase	MMV687706	Benzenoids	Benzene and substituted derivatives	Diphenylethers
Glyma.08G043900	M321T870_POS	-0.536989	0.0215678	Aspartate--tRNA ligase / Aspartyl-tRNA synthetase	Anomallotusin
Glyma.08G043900	M322T702_NEG	-0.567188	0.0140967	Aspartate--tRNA ligase / Aspartyl-tRNA synthetase	(-)-Jasmonoyl-L-isoleucine	Organic acids and derivatives	Carboxylic acids and derivatives	Amino acids, peptides, and analogues
Glyma.08G043900	M329T783_POS	-0.640083	0.00422067	Aspartate--tRNA ligase / Aspartyl-tRNA synthetase	(4Z,7Z,10Z,13Z,16Z,19Z)-Docosahexaenoic acid	Lipids and lipid-like molecules	Fatty Acyls	Fatty acids and conjugates
Glyma.08G043900	M331T724_POS	-0.657164	0.00304319	Aspartate--tRNA ligase / Aspartyl-tRNA synthetase	(7Z,10Z,13Z,16Z,19Z)-Docosapentaenoic acid	Lipids and lipid-like molecules	Fatty Acyls	Fatty acids and conjugates
Glyma.08G043900	M336T913_POS	-0.618911	0.00617144	Aspartate--tRNA ligase / Aspartyl-tRNA synthetase	N4-(beta-N-acetyl-D-glucosaminyl)-L-asparagine
Glyma.08G043900	M338T700_POS	-0.700973	0.00119203	Aspartate--tRNA ligase / Aspartyl-tRNA synthetase	5-Hydroxymethyldeoxycytidylate	Nucleosides, nucleotides, and analogues	Pyrimidine nucleotides	Pyrimidine deoxyribonucleotides
Glyma.08G043900	M345T861_POS	-0.618331	0.00623368	Aspartate--tRNA ligase / Aspartyl-tRNA synthetase	SB 205607	Organoheterocyclic compounds	Quinolines and derivatives	Phenylquinolines
Glyma.08G043900	M347T786_POS	-0.851821	7.26268e-06	Aspartate--tRNA ligase / Aspartyl-tRNA synthetase	Corticosterone	Lipids and lipid-like molecules	Steroids and steroid derivatives	Hydroxysteroids
Glyma.08G043900	M350T742_POS	-0.530742	0.0234431	Aspartate--tRNA ligase / Aspartyl-tRNA synthetase	1-(2-carboxyphenylamino)-1-deoxy-D-ribulose 5-phosphate
Glyma.08G043900	M363T910_POS	-0.622057	0.00584247	Aspartate--tRNA ligase / Aspartyl-tRNA synthetase	3,6,9,12-Tetraoxatetracosan-1-ol	Organic oxygen compounds	Organooxygen compounds	Ethers
Glyma.08G043900	M363T922_NEG	-0.725187	0.000660542	Aspartate--tRNA ligase / Aspartyl-tRNA synthetase	XMP
Glyma.08G043900	M391T699_NEG	-0.726198	0.000643634	Aspartate--tRNA ligase / Aspartyl-tRNA synthetase	5-O-Demethylnobiletin
Glyma.08G043900	M426T439_NEG	-0.516708	0.0281203	Aspartate--tRNA ligase / Aspartyl-tRNA synthetase	ADP group
Glyma.08G043900	M430T906_POS	-0.616589	0.00642365	Aspartate--tRNA ligase / Aspartyl-tRNA synthetase	15alpha-Hydroxysolasodine	Lipids and lipid-like molecules	Steroids and steroid derivatives	Steroidal alkaloids
Glyma.08G043900	M433T374_POS	-0.520926	0.0266445	Aspartate--tRNA ligase / Aspartyl-tRNA synthetase	Apigenin-7-O-glucoside	Phenylpropanoids and polyketides	Flavonoids	Flavonoid glycosides
Glyma.08G043900	M471T243_NEG	-0.627633	0.00529447	Aspartate--tRNA ligase / Aspartyl-tRNA synthetase	Hassmarin	Phenylpropanoids and polyketides	Coumarins and derivatives	Pyranocoumarins
Glyma.08G043900	M484T489_POS	-0.53625	0.0217834	Aspartate--tRNA ligase / Aspartyl-tRNA synthetase	Kanamycin B	Organic oxygen compounds	Organooxygen compounds	Carbohydrates and carbohydrate conjugates
Glyma.08G043900	M613T608_NEG	-0.589682	0.0100051	Aspartate--tRNA ligase / Aspartyl-tRNA synthetase	Neomycin B	Organic oxygen compounds	Organooxygen compounds	Carbohydrates and carbohydrate conjugates
Glyma.08G043900	M629T490_NEG	-0.503145	0.0332998	Aspartate--tRNA ligase / Aspartyl-tRNA synthetase	GDP-4-acetamido-4,6-dideoxy-alpha-D-mannose	Nucleosides, nucleotides, and analogues	Purine nucleotides	Purine nucleotide sugars
Glyma.08G043900	M640T413_POS	-0.708566	0.000996712	Aspartate--tRNA ligase / Aspartyl-tRNA synthetase	Demethyl-desacetyl-rifamycin S	Phenylpropanoids and polyketides	Macrolactams	NA
Glyma.08G043900	M663T414_NEG	-0.541788	0.0202089	Aspartate--tRNA ligase / Aspartyl-tRNA synthetase	NAD+	Nucleosides, nucleotides, and analogues	(5'->5')-dinucleotides	NA
Glyma.08G043900	M88T67_NEG	-0.557702	0.0161779	Aspartate--tRNA ligase / Aspartyl-tRNA synthetase	L-Alanine	Organic acids and derivatives	Carboxylic acids and derivatives	Amino acids, peptides, and analogues
Glyma.08G043900	M90T68_POS	-0.542469	0.0200216	Aspartate--tRNA ligase / Aspartyl-tRNA synthetase	beta-Alanine	Organic acids and derivatives	Carboxylic acids and derivatives	Amino acids, peptides, and analogues
Glyma.08G043900	M974T533_3_POS	-0.594932	0.00920352	Aspartate--tRNA ligase / Aspartyl-tRNA synthetase	Sinapoyl-CoA	Lipids and lipid-like molecules	Fatty Acyls	Fatty acyl thioesters
Glyma.08G047100	M104T65_NEG	-0.559186	0.0158372	aspartyl-tRNA(Asn)/glutamyl-tRNA(Gln) amidotransferase subunit B (gatB, PET112)	Serine	Organic acids and derivatives	Carboxylic acids and derivatives	Amino acids, peptides, and analogues
Glyma.08G047100	M106T70_POS	-0.638491	0.00434714	aspartyl-tRNA(Asn)/glutamyl-tRNA(Gln) amidotransferase subunit B (gatB, PET112)	L-Serine	Organic acids and derivatives	Carboxylic acids and derivatives	Amino acids, peptides, and analogues
Glyma.08G047100	M113T68_NEG	-0.564339	0.0146981	aspartyl-tRNA(Asn)/glutamyl-tRNA(Gln) amidotransferase subunit B (gatB, PET112)	2-Hydroxy-2,4-pentadienoate	Lipids and lipid-like molecules	Fatty Acyls	Fatty acids and conjugates
Glyma.08G047100	M120T69_POS	-0.508508	0.0311705	aspartyl-tRNA(Asn)/glutamyl-tRNA(Gln) amidotransferase subunit B (gatB, PET112)	Threonine	Organic acids and derivatives	Carboxylic acids and derivatives	Amino acids, peptides, and analogues
Glyma.08G047100	M124T986_POS	-0.5257	0.0250473	aspartyl-tRNA(Asn)/glutamyl-tRNA(Gln) amidotransferase subunit B (gatB, PET112)	Nicotinate	Organoheterocyclic compounds	Pyridines and derivatives	Pyridinecarboxylic acids and derivatives
Glyma.08G047100	M130T68_POS	-0.620337	0.00602043	aspartyl-tRNA(Asn)/glutamyl-tRNA(Gln) amidotransferase subunit B (gatB, PET112)	5-Oxoproline	Organic acids and derivatives	Carboxylic acids and derivatives	Amino acids, peptides, and analogues
Glyma.08G047100	M138T295_POS	-0.602583	0.00812853	aspartyl-tRNA(Asn)/glutamyl-tRNA(Gln) amidotransferase subunit B (gatB, PET112)	4-Aminobenzoate	Benzenoids	Benzene and substituted derivatives	Benzoic acids and derivatives
Glyma.08G047100	M147T69_POS	-0.514888	0.0287765	aspartyl-tRNA(Asn)/glutamyl-tRNA(Gln) amidotransferase subunit B (gatB, PET112)	L-Glutamine	Organic acids and derivatives	Carboxylic acids and derivatives	Amino acids, peptides, and analogues
Glyma.08G047100	M151T762_POS	-0.624776	0.00556971	aspartyl-tRNA(Asn)/glutamyl-tRNA(Gln) amidotransferase subunit B (gatB, PET112)	Thymol	Lipids and lipid-like molecules	Prenol lipids	Monoterpenoids
Glyma.08G047100	M158T107_NEG	-0.518438	0.0275076	aspartyl-tRNA(Asn)/glutamyl-tRNA(Gln) amidotransferase subunit B (gatB, PET112)	5-Acetamidopentanoate	Lipids and lipid-like molecules	Fatty Acyls	Fatty acids and conjugates
Glyma.08G047100	M166T660_POS	-0.500921	0.0342152	aspartyl-tRNA(Asn)/glutamyl-tRNA(Gln) amidotransferase subunit B (gatB, PET112)	Hordenine	Benzenoids	Benzene and substituted derivatives	Phenethylamines
Glyma.08G047100	M169T761_POS	-0.640893	0.00415753	aspartyl-tRNA(Asn)/glutamyl-tRNA(Gln) amidotransferase subunit B (gatB, PET112)	6-Hydroxy-2,6-dimethyl-2,7-octadien-4-one	Lipids and lipid-like molecules	Prenol lipids	Monoterpenoids
Glyma.08G047100	M177T695_POS	-0.590502	0.00987636	aspartyl-tRNA(Asn)/glutamyl-tRNA(Gln) amidotransferase subunit B (gatB, PET112)	4-deoxy-L-threo-hex-4-enopyranuronate
Glyma.08G047100	M185T66_POS	-0.585529	0.0106781	aspartyl-tRNA(Asn)/glutamyl-tRNA(Gln) amidotransferase subunit B (gatB, PET112)	5-Hydroxyisourate	Organoheterocyclic compounds	Imidazopyrimidines	Purines and purine derivatives
Glyma.08G047100	M186T66_POS	-0.586879	0.0104554	aspartyl-tRNA(Asn)/glutamyl-tRNA(Gln) amidotransferase subunit B (gatB, PET112)	2-Amino-3-carboxymuconate semialdehyde	Organic acids and derivatives	Carboxylic acids and derivatives	Amino acids, peptides, and analogues
Glyma.08G047100	M187T69_POS	-0.562747	0.0150428	aspartyl-tRNA(Asn)/glutamyl-tRNA(Gln) amidotransferase subunit B (gatB, PET112)	3-maleylpyruvate
Glyma.08G047100	M191T595_POS	-0.7558	0.00028562	aspartyl-tRNA(Asn)/glutamyl-tRNA(Gln) amidotransferase subunit B (gatB, PET112)	beta-Damascenone	Organic oxygen compounds	Organooxygen compounds	Carbonyl compounds
Glyma.08G047100	M193T806_POS	-0.691676	0.0014735	aspartyl-tRNA(Asn)/glutamyl-tRNA(Gln) amidotransferase subunit B (gatB, PET112)	Vitispirane	Organoheterocyclic compounds	Tetrahydrofurans
Glyma.08G047100	M199T446_POS	-0.578426	0.0119129	aspartyl-tRNA(Asn)/glutamyl-tRNA(Gln) amidotransferase subunit B (gatB, PET112)	Hercynine	Organic acids and derivatives	Carboxylic acids and derivatives	Amino acids, peptides, and analogues
Glyma.08G047100	M201T74_POS	-0.720472	0.000744443	aspartyl-tRNA(Asn)/glutamyl-tRNA(Gln) amidotransferase subunit B (gatB, PET112)	D-erythrose 4-phosphate
Glyma.08G047100	M207T711_POS	-0.631294	0.00495792	aspartyl-tRNA(Asn)/glutamyl-tRNA(Gln) amidotransferase subunit B (gatB, PET112)	Etrogol	Benzenoids	Phenols	Tyrosols and derivatives
Glyma.08G047100	M209T604_POS	-0.637166	0.00445472	aspartyl-tRNA(Asn)/glutamyl-tRNA(Gln) amidotransferase subunit B (gatB, PET112)	alpha-Asarone	Benzenoids	Phenol ethers	Anisoles
Glyma.08G047100	M215T194_POS	-0.602123	0.00819025	aspartyl-tRNA(Asn)/glutamyl-tRNA(Gln) amidotransferase subunit B (gatB, PET112)	Dethiobiotin	Lipids and lipid-like molecules	Fatty Acyls	Fatty acids and conjugates
Glyma.08G047100	M223T934_POS	0.530349	0.023565	aspartyl-tRNA(Asn)/glutamyl-tRNA(Gln) amidotransferase subunit B (gatB, PET112)	1,2-Diphenyl-2-buten-1-one	Phenylpropanoids and polyketides	Stilbenes
Glyma.08G047100	M235T732_POS	-0.60579	0.00770927	aspartyl-tRNA(Asn)/glutamyl-tRNA(Gln) amidotransferase subunit B (gatB, PET112)	Germacrene A acid	Lipids and lipid-like molecules	Prenol lipids	Sesquiterpenoids
Glyma.08G047100	M237T723_NEG	-0.532056	0.0230383	aspartyl-tRNA(Asn)/glutamyl-tRNA(Gln) amidotransferase subunit B (gatB, PET112)	OPC-4:0	Organic oxygen compounds	Organooxygen compounds	Carbonyl compounds
Glyma.08G047100	M237T724_POS	-0.717091	0.000809943	aspartyl-tRNA(Asn)/glutamyl-tRNA(Gln) amidotransferase subunit B (gatB, PET112)	Aubergenone	Lipids and lipid-like molecules	Prenol lipids	Sesquiterpenoids
Glyma.08G047100	M238T70_POS	-0.564832	0.0145926	aspartyl-tRNA(Asn)/glutamyl-tRNA(Gln) amidotransferase subunit B (gatB, PET112)	S-succinylcysteine	Organic acids and derivatives	Carboxylic acids and derivatives	Amino acids, peptides, and analogues
Glyma.08G047100	M252T98_POS	-0.658406	0.00296937	aspartyl-tRNA(Asn)/glutamyl-tRNA(Gln) amidotransferase subunit B (gatB, PET112)	Deoxyadenosine	Nucleosides, nucleotides, and analogues	Purine nucleosides	Purine 2'-deoxyribonucleosides
Glyma.08G047100	M258T660_POS	-0.625836	0.00546632	aspartyl-tRNA(Asn)/glutamyl-tRNA(Gln) amidotransferase subunit B (gatB, PET112)	Norcraugsodine	Benzenoids	Phenols	Benzenediols
Glyma.08G047100	M269T389_NEG	-0.525814	0.0250103	aspartyl-tRNA(Asn)/glutamyl-tRNA(Gln) amidotransferase subunit B (gatB, PET112)	4',6,7-Trihydroxyisoflavone	Phenylpropanoids and polyketides	Isoflavonoids	Isoflav-2-enes
Glyma.08G047100	M269T661_POS	-0.564378	0.0146897	aspartyl-tRNA(Asn)/glutamyl-tRNA(Gln) amidotransferase subunit B (gatB, PET112)	1-Hydroxytorilolone	Lipids and lipid-like molecules	Prenol lipids	Sesquiterpenoids
Glyma.08G047100	M273T639_POS	-0.688563	0.00157924	aspartyl-tRNA(Asn)/glutamyl-tRNA(Gln) amidotransferase subunit B (gatB, PET112)	Naringenin chalcone	Phenylpropanoids and polyketides	Linear 1,3-diarylpropanoids	Chalcones and dihydrochalcones
Glyma.08G047100	M277T796_POS	-0.641044	0.00414584	aspartyl-tRNA(Asn)/glutamyl-tRNA(Gln) amidotransferase subunit B (gatB, PET112)	Dehydrocrepenynic acid	Lipids and lipid-like molecules	Fatty Acyls	Fatty acids and conjugates
Glyma.08G047100	M279T781_POS	-0.607902	0.00744269	aspartyl-tRNA(Asn)/glutamyl-tRNA(Gln) amidotransferase subunit B (gatB, PET112)	?-linolenic acid	Lipids and lipid-like molecules	Fatty Acyls	Lineolic acids and derivatives
Glyma.08G047100	M287T811_POS	-0.614149	0.00669772	aspartyl-tRNA(Asn)/glutamyl-tRNA(Gln) amidotransferase subunit B (gatB, PET112)	Retinol	Lipids and lipid-like molecules	Prenol lipids	Retinoids
Glyma.08G047100	M288T742_POS	-0.654173	0.00322714	aspartyl-tRNA(Asn)/glutamyl-tRNA(Gln) amidotransferase subunit B (gatB, PET112)	Lauryl diethanolamide	Lipids and lipid-like molecules	Fatty Acyls	Fatty amides
Glyma.08G047100	M291T743_POS	-0.564047	0.0147608	aspartyl-tRNA(Asn)/glutamyl-tRNA(Gln) amidotransferase subunit B (gatB, PET112)	Deoxy phytoprostane J1	Lipids and lipid-like molecules	Fatty Acyls	Eicosanoids
Glyma.08G047100	M295T796_POS	-0.627565	0.00530086	aspartyl-tRNA(Asn)/glutamyl-tRNA(Gln) amidotransferase subunit B (gatB, PET112)	Colneleic acid	Lipids and lipid-like molecules	Fatty Acyls	Fatty acids and conjugates
Glyma.08G047100	M298T830_POS	-0.62198	0.00585034	aspartyl-tRNA(Asn)/glutamyl-tRNA(Gln) amidotransferase subunit B (gatB, PET112)	N7-methylguanosine
Glyma.08G047100	M303T888_POS	-0.671043	0.00229838	aspartyl-tRNA(Asn)/glutamyl-tRNA(Gln) amidotransferase subunit B (gatB, PET112)	(3R,4R)-3-(6-hydroxy-1,3-benzodioxol-5-yl)-3,4-dihydro-2H-chromene-4,7-diol
Glyma.08G047100	M305T814_POS	-0.606778	0.00758363	aspartyl-tRNA(Asn)/glutamyl-tRNA(Gln) amidotransferase subunit B (gatB, PET112)	3-Acetoxy-9-heptadecene-4,6-diyn-8-ol.	Lipids and lipid-like molecules	Fatty Acyls	Fatty alcohol esters
Glyma.08G047100	M313T734_NEG	-0.565153	0.0145242	aspartyl-tRNA(Asn)/glutamyl-tRNA(Gln) amidotransferase subunit B (gatB, PET112)	12,13-DHOME	Lipids and lipid-like molecules	Fatty Acyls	Fatty acids and conjugates
Glyma.08G047100	M321T683_POS	-0.57436	0.0126693	aspartyl-tRNA(Asn)/glutamyl-tRNA(Gln) amidotransferase subunit B (gatB, PET112)	MMV687706	Benzenoids	Benzene and substituted derivatives	Diphenylethers
Glyma.08G047100	M329T653_POS	-0.551767	0.0175989	aspartyl-tRNA(Asn)/glutamyl-tRNA(Gln) amidotransferase subunit B (gatB, PET112)	2,3-Dinor-8-iso prostaglandin F1alpha	Lipids and lipid-like molecules	Fatty Acyls	Eicosanoids
Glyma.08G047100	M329T783_POS	-0.609856	0.00720281	aspartyl-tRNA(Asn)/glutamyl-tRNA(Gln) amidotransferase subunit B (gatB, PET112)	(4Z,7Z,10Z,13Z,16Z,19Z)-Docosahexaenoic acid	Lipids and lipid-like molecules	Fatty Acyls	Fatty acids and conjugates
Glyma.08G047100	M331T724_POS	-0.663693	0.00267139	aspartyl-tRNA(Asn)/glutamyl-tRNA(Gln) amidotransferase subunit B (gatB, PET112)	(7Z,10Z,13Z,16Z,19Z)-Docosapentaenoic acid	Lipids and lipid-like molecules	Fatty Acyls	Fatty acids and conjugates
Glyma.08G047100	M336T913_POS	-0.598092	0.00874656	aspartyl-tRNA(Asn)/glutamyl-tRNA(Gln) amidotransferase subunit B (gatB, PET112)	N4-(beta-N-acetyl-D-glucosaminyl)-L-asparagine
Glyma.08G047100	M338T700_POS	-0.65611	0.00310697	aspartyl-tRNA(Asn)/glutamyl-tRNA(Gln) amidotransferase subunit B (gatB, PET112)	5-Hydroxymethyldeoxycytidylate	Nucleosides, nucleotides, and analogues	Pyrimidine nucleotides	Pyrimidine deoxyribonucleotides
Glyma.08G047100	M345T861_POS	-0.513453	0.0293019	aspartyl-tRNA(Asn)/glutamyl-tRNA(Gln) amidotransferase subunit B (gatB, PET112)	SB 205607	Organoheterocyclic compounds	Quinolines and derivatives	Phenylquinolines
Glyma.08G047100	M347T786_POS	-0.804315	5.73119e-05	aspartyl-tRNA(Asn)/glutamyl-tRNA(Gln) amidotransferase subunit B (gatB, PET112)	Corticosterone	Lipids and lipid-like molecules	Steroids and steroid derivatives	Hydroxysteroids
Glyma.08G047100	M350T742_POS	-0.534803	0.02221	aspartyl-tRNA(Asn)/glutamyl-tRNA(Gln) amidotransferase subunit B (gatB, PET112)	1-(2-carboxyphenylamino)-1-deoxy-D-ribulose 5-phosphate
Glyma.08G047100	M363T910_POS	-0.619046	0.006157	aspartyl-tRNA(Asn)/glutamyl-tRNA(Gln) amidotransferase subunit B (gatB, PET112)	3,6,9,12-Tetraoxatetracosan-1-ol	Organic oxygen compounds	Organooxygen compounds	Ethers
Glyma.08G047100	M363T922_NEG	-0.787462	0.000104822	aspartyl-tRNA(Asn)/glutamyl-tRNA(Gln) amidotransferase subunit B (gatB, PET112)	XMP
Glyma.08G047100	M391T699_NEG	-0.736661	0.000488787	aspartyl-tRNA(Asn)/glutamyl-tRNA(Gln) amidotransferase subunit B (gatB, PET112)	5-O-Demethylnobiletin
Glyma.08G047100	M417T438_POS	-0.515501	0.0285542	aspartyl-tRNA(Asn)/glutamyl-tRNA(Gln) amidotransferase subunit B (gatB, PET112)	Daidzein-8-C-glucoside	Phenylpropanoids and polyketides	Isoflavonoids	Isoflavonoid C-glycosides
Glyma.08G047100	M426T439_NEG	-0.509749	0.0306933	aspartyl-tRNA(Asn)/glutamyl-tRNA(Gln) amidotransferase subunit B (gatB, PET112)	ADP group
Glyma.08G047100	M430T906_POS	-0.608827	0.00732843	aspartyl-tRNA(Asn)/glutamyl-tRNA(Gln) amidotransferase subunit B (gatB, PET112)	15alpha-Hydroxysolasodine	Lipids and lipid-like molecules	Steroids and steroid derivatives	Steroidal alkaloids
Glyma.08G047100	M433T374_POS	-0.515242	0.0286478	aspartyl-tRNA(Asn)/glutamyl-tRNA(Gln) amidotransferase subunit B (gatB, PET112)	Apigenin-7-O-glucoside	Phenylpropanoids and polyketides	Flavonoids	Flavonoid glycosides
Glyma.08G047100	M457T870_POS	-0.624231	0.00562355	aspartyl-tRNA(Asn)/glutamyl-tRNA(Gln) amidotransferase subunit B (gatB, PET112)	Oleanolic acid	Lipids and lipid-like molecules	Prenol lipids	Triterpenoids
Glyma.08G047100	M471T243_NEG	-0.615911	0.00649891	aspartyl-tRNA(Asn)/glutamyl-tRNA(Gln) amidotransferase subunit B (gatB, PET112)	Hassmarin	Phenylpropanoids and polyketides	Coumarins and derivatives	Pyranocoumarins
Glyma.08G047100	M613T608_NEG	-0.503231	0.0332648	aspartyl-tRNA(Asn)/glutamyl-tRNA(Gln) amidotransferase subunit B (gatB, PET112)	Neomycin B	Organic oxygen compounds	Organooxygen compounds	Carbohydrates and carbohydrate conjugates
Glyma.08G047100	M629T490_NEG	-0.527933	0.0243266	aspartyl-tRNA(Asn)/glutamyl-tRNA(Gln) amidotransferase subunit B (gatB, PET112)	GDP-4-acetamido-4,6-dideoxy-alpha-D-mannose	Nucleosides, nucleotides, and analogues	Purine nucleotides	Purine nucleotide sugars
Glyma.08G047100	M640T413_POS	-0.748531	0.00035219	aspartyl-tRNA(Asn)/glutamyl-tRNA(Gln) amidotransferase subunit B (gatB, PET112)	Demethyl-desacetyl-rifamycin S	Phenylpropanoids and polyketides	Macrolactams	NA
Glyma.08G047100	M663T414_NEG	-0.507838	0.0314305	aspartyl-tRNA(Asn)/glutamyl-tRNA(Gln) amidotransferase subunit B (gatB, PET112)	NAD+	Nucleosides, nucleotides, and analogues	(5'->5')-dinucleotides	NA
Glyma.08G047100	M74T103_POS	-0.503642	0.0330979	aspartyl-tRNA(Asn)/glutamyl-tRNA(Gln) amidotransferase subunit B (gatB, PET112)	N,N-Dimethylformamide	Organic acids and derivatives	Carboxylic acids and derivatives	Carboxylic acid derivatives
Glyma.08G047100	M793T393_2_POS	0.51297	0.0294806	aspartyl-tRNA(Asn)/glutamyl-tRNA(Gln) amidotransferase subunit B (gatB, PET112)	Betavulgaroside II	Lipids and lipid-like molecules	Prenol lipids	Triterpenoids
Glyma.08G047100	M90T68_POS	-0.5272	0.0245614	aspartyl-tRNA(Asn)/glutamyl-tRNA(Gln) amidotransferase subunit B (gatB, PET112)	beta-Alanine	Organic acids and derivatives	Carboxylic acids and derivatives	Amino acids, peptides, and analogues
Glyma.08G047100	M974T533_3_POS	-0.546768	0.018871	aspartyl-tRNA(Asn)/glutamyl-tRNA(Gln) amidotransferase subunit B (gatB, PET112)	Sinapoyl-CoA	Lipids and lipid-like molecules	Fatty Acyls	Fatty acyl thioesters
Glyma.08G311400	M105T714_POS	-0.569004	0.0137237	aspartyl-tRNA(Asn)/glutamyl-tRNA(Gln) amidotransferase subunit A (gatA, QRSL1)	Styrene	Benzenoids	Benzene and substituted derivatives	Styrenes
Glyma.08G311400	M138T295_POS	-0.593696	0.00938742	aspartyl-tRNA(Asn)/glutamyl-tRNA(Gln) amidotransferase subunit A (gatA, QRSL1)	4-Aminobenzoate	Benzenoids	Benzene and substituted derivatives	Benzoic acids and derivatives
Glyma.08G311400	M142T82_POS	-0.539178	0.0209392	aspartyl-tRNA(Asn)/glutamyl-tRNA(Gln) amidotransferase subunit A (gatA, QRSL1)	2-Aminomuconate semialdehyde	Organic acids and derivatives	Carboxylic acids and derivatives	Amino acids, peptides, and analogues
Glyma.08G311400	M151T762_POS	-0.532585	0.022877	aspartyl-tRNA(Asn)/glutamyl-tRNA(Gln) amidotransferase subunit A (gatA, QRSL1)	Thymol	Lipids and lipid-like molecules	Prenol lipids	Monoterpenoids
Glyma.08G311400	M157T938_POS	-0.506475	0.0319649	aspartyl-tRNA(Asn)/glutamyl-tRNA(Gln) amidotransferase subunit A (gatA, QRSL1)	2-Phosphoglycolate	Organic acids and derivatives	Organic phosphoric acids and derivatives	Phosphate esters
Glyma.08G311400	M169T761_POS	-0.591939	0.00965396	aspartyl-tRNA(Asn)/glutamyl-tRNA(Gln) amidotransferase subunit A (gatA, QRSL1)	6-Hydroxy-2,6-dimethyl-2,7-octadien-4-one	Lipids and lipid-like molecules	Prenol lipids	Monoterpenoids
Glyma.08G311400	M186T66_POS	-0.53224	0.0229823	aspartyl-tRNA(Asn)/glutamyl-tRNA(Gln) amidotransferase subunit A (gatA, QRSL1)	2-Amino-3-carboxymuconate semialdehyde	Organic acids and derivatives	Carboxylic acids and derivatives	Amino acids, peptides, and analogues
Glyma.08G311400	M187T69_POS	-0.512732	0.0295689	aspartyl-tRNA(Asn)/glutamyl-tRNA(Gln) amidotransferase subunit A (gatA, QRSL1)	3-maleylpyruvate
Glyma.08G311400	M191T595_POS	-0.708639	0.000994968	aspartyl-tRNA(Asn)/glutamyl-tRNA(Gln) amidotransferase subunit A (gatA, QRSL1)	beta-Damascenone	Organic oxygen compounds	Organooxygen compounds	Carbonyl compounds
Glyma.08G311400	M193T806_POS	-0.602616	0.0081242	aspartyl-tRNA(Asn)/glutamyl-tRNA(Gln) amidotransferase subunit A (gatA, QRSL1)	Vitispirane	Organoheterocyclic compounds	Tetrahydrofurans
Glyma.08G311400	M199T446_POS	-0.597126	0.00888418	aspartyl-tRNA(Asn)/glutamyl-tRNA(Gln) amidotransferase subunit A (gatA, QRSL1)	Hercynine	Organic acids and derivatives	Carboxylic acids and derivatives	Amino acids, peptides, and analogues
Glyma.08G311400	M201T74_POS	-0.52327	0.0258505	aspartyl-tRNA(Asn)/glutamyl-tRNA(Gln) amidotransferase subunit A (gatA, QRSL1)	D-erythrose 4-phosphate
Glyma.08G311400	M207T711_POS	-0.546299	0.0189938	aspartyl-tRNA(Asn)/glutamyl-tRNA(Gln) amidotransferase subunit A (gatA, QRSL1)	Etrogol	Benzenoids	Phenols	Tyrosols and derivatives
Glyma.08G311400	M223T934_POS	0.702828	0.00114161	aspartyl-tRNA(Asn)/glutamyl-tRNA(Gln) amidotransferase subunit A (gatA, QRSL1)	1,2-Diphenyl-2-buten-1-one	Phenylpropanoids and polyketides	Stilbenes
Glyma.08G311400	M235T732_POS	-0.52317	0.0258842	aspartyl-tRNA(Asn)/glutamyl-tRNA(Gln) amidotransferase subunit A (gatA, QRSL1)	Germacrene A acid	Lipids and lipid-like molecules	Prenol lipids	Sesquiterpenoids
Glyma.08G311400	M237T724_POS	-0.589383	0.0100524	aspartyl-tRNA(Asn)/glutamyl-tRNA(Gln) amidotransferase subunit A (gatA, QRSL1)	Aubergenone	Lipids and lipid-like molecules	Prenol lipids	Sesquiterpenoids
Glyma.08G311400	M258T660_POS	-0.638445	0.00435084	aspartyl-tRNA(Asn)/glutamyl-tRNA(Gln) amidotransferase subunit A (gatA, QRSL1)	Norcraugsodine	Benzenoids	Phenols	Benzenediols
Glyma.08G311400	M258T98_POS	-0.506045	0.0321348	aspartyl-tRNA(Asn)/glutamyl-tRNA(Gln) amidotransferase subunit A (gatA, QRSL1)	N-Methylatanine	Organoheterocyclic compounds	Quinolines and derivatives	Quinolones and derivatives
Glyma.08G311400	M269T661_POS	-0.556267	0.0165129	aspartyl-tRNA(Asn)/glutamyl-tRNA(Gln) amidotransferase subunit A (gatA, QRSL1)	1-Hydroxytorilolone	Lipids and lipid-like molecules	Prenol lipids	Sesquiterpenoids
Glyma.08G311400	M273T639_POS	-0.576169	0.0123282	aspartyl-tRNA(Asn)/glutamyl-tRNA(Gln) amidotransferase subunit A (gatA, QRSL1)	Naringenin chalcone	Phenylpropanoids and polyketides	Linear 1,3-diarylpropanoids	Chalcones and dihydrochalcones
Glyma.08G311400	M277T796_POS	-0.53072	0.0234497	aspartyl-tRNA(Asn)/glutamyl-tRNA(Gln) amidotransferase subunit A (gatA, QRSL1)	Dehydrocrepenynic acid	Lipids and lipid-like molecules	Fatty Acyls	Fatty acids and conjugates
Glyma.08G311400	M287T811_POS	-0.651088	0.00342628	aspartyl-tRNA(Asn)/glutamyl-tRNA(Gln) amidotransferase subunit A (gatA, QRSL1)	Retinol	Lipids and lipid-like molecules	Prenol lipids	Retinoids
Glyma.08G311400	M288T742_POS	-0.650898	0.0034389	aspartyl-tRNA(Asn)/glutamyl-tRNA(Gln) amidotransferase subunit A (gatA, QRSL1)	Lauryl diethanolamide	Lipids and lipid-like molecules	Fatty Acyls	Fatty amides
Glyma.08G311400	M291T743_POS	-0.527631	0.0244231	aspartyl-tRNA(Asn)/glutamyl-tRNA(Gln) amidotransferase subunit A (gatA, QRSL1)	Deoxy phytoprostane J1	Lipids and lipid-like molecules	Fatty Acyls	Eicosanoids
Glyma.08G311400	M295T796_POS	-0.52754	0.0244523	aspartyl-tRNA(Asn)/glutamyl-tRNA(Gln) amidotransferase subunit A (gatA, QRSL1)	Colneleic acid	Lipids and lipid-like molecules	Fatty Acyls	Fatty acids and conjugates
Glyma.08G311400	M298T830_POS	-0.539087	0.0209653	aspartyl-tRNA(Asn)/glutamyl-tRNA(Gln) amidotransferase subunit A (gatA, QRSL1)	N7-methylguanosine
Glyma.08G311400	M302T722_POS	-0.518966	0.0273225	aspartyl-tRNA(Asn)/glutamyl-tRNA(Gln) amidotransferase subunit A (gatA, QRSL1)	CIF 3
Glyma.08G311400	M303T888_POS	-0.546171	0.0190275	aspartyl-tRNA(Asn)/glutamyl-tRNA(Gln) amidotransferase subunit A (gatA, QRSL1)	(3R,4R)-3-(6-hydroxy-1,3-benzodioxol-5-yl)-3,4-dihydro-2H-chromene-4,7-diol
Glyma.08G311400	M305T814_POS	-0.536098	0.0218277	aspartyl-tRNA(Asn)/glutamyl-tRNA(Gln) amidotransferase subunit A (gatA, QRSL1)	3-Acetoxy-9-heptadecene-4,6-diyn-8-ol.	Lipids and lipid-like molecules	Fatty Acyls	Fatty alcohol esters
Glyma.08G311400	M321T683_POS	-0.514611	0.0288773	aspartyl-tRNA(Asn)/glutamyl-tRNA(Gln) amidotransferase subunit A (gatA, QRSL1)	MMV687706	Benzenoids	Benzene and substituted derivatives	Diphenylethers
Glyma.08G311400	M329T783_POS	-0.526202	0.0248839	aspartyl-tRNA(Asn)/glutamyl-tRNA(Gln) amidotransferase subunit A (gatA, QRSL1)	(4Z,7Z,10Z,13Z,16Z,19Z)-Docosahexaenoic acid	Lipids and lipid-like molecules	Fatty Acyls	Fatty acids and conjugates
Glyma.08G311400	M331T724_POS	-0.511054	0.0301972	aspartyl-tRNA(Asn)/glutamyl-tRNA(Gln) amidotransferase subunit A (gatA, QRSL1)	(7Z,10Z,13Z,16Z,19Z)-Docosapentaenoic acid	Lipids and lipid-like molecules	Fatty Acyls	Fatty acids and conjugates
Glyma.08G311400	M336T913_POS	-0.556002	0.0165754	aspartyl-tRNA(Asn)/glutamyl-tRNA(Gln) amidotransferase subunit A (gatA, QRSL1)	N4-(beta-N-acetyl-D-glucosaminyl)-L-asparagine
Glyma.08G311400	M338T700_POS	-0.59885	0.0086396	aspartyl-tRNA(Asn)/glutamyl-tRNA(Gln) amidotransferase subunit A (gatA, QRSL1)	5-Hydroxymethyldeoxycytidylate	Nucleosides, nucleotides, and analogues	Pyrimidine nucleotides	Pyrimidine deoxyribonucleotides
Glyma.08G311400	M345T861_POS	-0.503948	0.032974	aspartyl-tRNA(Asn)/glutamyl-tRNA(Gln) amidotransferase subunit A (gatA, QRSL1)	SB 205607	Organoheterocyclic compounds	Quinolines and derivatives	Phenylquinolines
Glyma.08G311400	M347T786_POS	-0.721462	0.00072613	aspartyl-tRNA(Asn)/glutamyl-tRNA(Gln) amidotransferase subunit A (gatA, QRSL1)	Corticosterone	Lipids and lipid-like molecules	Steroids and steroid derivatives	Hydroxysteroids
Glyma.08G311400	M363T910_POS	-0.561692	0.0152749	aspartyl-tRNA(Asn)/glutamyl-tRNA(Gln) amidotransferase subunit A (gatA, QRSL1)	3,6,9,12-Tetraoxatetracosan-1-ol	Organic oxygen compounds	Organooxygen compounds	Ethers
Glyma.08G311400	M363T922_NEG	-0.738314	0.00046746	aspartyl-tRNA(Asn)/glutamyl-tRNA(Gln) amidotransferase subunit A (gatA, QRSL1)	XMP
Glyma.08G311400	M377T346_POS	-0.501979	0.0337772	aspartyl-tRNA(Asn)/glutamyl-tRNA(Gln) amidotransferase subunit A (gatA, QRSL1)	Riboflavin	Organoheterocyclic compounds	Pteridines and derivatives	Alloxazines and isoalloxazines
Glyma.08G311400	M391T699_NEG	-0.57395	0.0127477	aspartyl-tRNA(Asn)/glutamyl-tRNA(Gln) amidotransferase subunit A (gatA, QRSL1)	5-O-Demethylnobiletin
Glyma.08G311400	M426T439_NEG	-0.525396	0.0251469	aspartyl-tRNA(Asn)/glutamyl-tRNA(Gln) amidotransferase subunit A (gatA, QRSL1)	ADP group
Glyma.08G311400	M430T906_POS	-0.55019	0.0179928	aspartyl-tRNA(Asn)/glutamyl-tRNA(Gln) amidotransferase subunit A (gatA, QRSL1)	15alpha-Hydroxysolasodine	Lipids and lipid-like molecules	Steroids and steroid derivatives	Steroidal alkaloids
Glyma.08G311400	M439T710_POS	-0.558233	0.0160554	aspartyl-tRNA(Asn)/glutamyl-tRNA(Gln) amidotransferase subunit A (gatA, QRSL1)	Demethylphylloquinol	Lipids and lipid-like molecules	Prenol lipids	Diterpenoids
Glyma.08G311400	M457T870_POS	-0.582038	0.0112715	aspartyl-tRNA(Asn)/glutamyl-tRNA(Gln) amidotransferase subunit A (gatA, QRSL1)	Oleanolic acid	Lipids and lipid-like molecules	Prenol lipids	Triterpenoids
Glyma.08G311400	M471T243_NEG	-0.531791	0.0231195	aspartyl-tRNA(Asn)/glutamyl-tRNA(Gln) amidotransferase subunit A (gatA, QRSL1)	Hassmarin	Phenylpropanoids and polyketides	Coumarins and derivatives	Pyranocoumarins
Glyma.08G311400	M600T447_2_POS	-0.547961	0.0185611	aspartyl-tRNA(Asn)/glutamyl-tRNA(Gln) amidotransferase subunit A (gatA, QRSL1)	5'''-epi-Lividomycin B	Organic oxygen compounds	Organooxygen compounds	Carbohydrates and carbohydrate conjugates
Glyma.08G311400	M663T414_NEG	-0.516759	0.0281021	aspartyl-tRNA(Asn)/glutamyl-tRNA(Gln) amidotransferase subunit A (gatA, QRSL1)	NAD+	Nucleosides, nucleotides, and analogues	(5'->5')-dinucleotides	NA
Glyma.08G311400	M74T103_POS	-0.55541	0.0167154	aspartyl-tRNA(Asn)/glutamyl-tRNA(Gln) amidotransferase subunit A (gatA, QRSL1)	N,N-Dimethylformamide	Organic acids and derivatives	Carboxylic acids and derivatives	Carboxylic acid derivatives
Glyma.08G311400	M793T393_2_POS	0.588863	0.010135	aspartyl-tRNA(Asn)/glutamyl-tRNA(Gln) amidotransferase subunit A (gatA, QRSL1)	Betavulgaroside II	Lipids and lipid-like molecules	Prenol lipids	Triterpenoids
Glyma.08G311400	M911T711_POS	-0.526936	0.0246465	aspartyl-tRNA(Asn)/glutamyl-tRNA(Gln) amidotransferase subunit A (gatA, QRSL1)	Soyasaponin Bg	Lipids and lipid-like molecules	Prenol lipids	Terpene glycosides
Glyma.10G214200	M142T225_POS	-0.640064	0.00422217	aspartyl-tRNA(Asn)/glutamyl-tRNA(Gln) amidotransferase subunit C (gatC, GATC)	O-phosphoethanolamine
Glyma.10G214200	M142T82_POS	0.51849	0.0274891	aspartyl-tRNA(Asn)/glutamyl-tRNA(Gln) amidotransferase subunit C (gatC, GATC)	2-Aminomuconate semialdehyde	Organic acids and derivatives	Carboxylic acids and derivatives	Amino acids, peptides, and analogues
Glyma.10G214200	M166T709_NEG	0.506234	0.0320601	aspartyl-tRNA(Asn)/glutamyl-tRNA(Gln) amidotransferase subunit C (gatC, GATC)	Quinolinate	Organoheterocyclic compounds	Pyridines and derivatives	Pyridinecarboxylic acids and derivatives
Glyma.10G214200	M167T929_NEG	0.50338	0.0332044	aspartyl-tRNA(Asn)/glutamyl-tRNA(Gln) amidotransferase subunit C (gatC, GATC)	Butanoylphosphate	Organic acids and derivatives	Organic phosphoric acids and derivatives	Phosphate esters
Glyma.10G214200	M171T165_POS	0.509537	0.0307742	aspartyl-tRNA(Asn)/glutamyl-tRNA(Gln) amidotransferase subunit C (gatC, GATC)	D-glyceraldehyde 3-phosphate
Glyma.10G214200	M173T928_NEG	0.581852	0.0113038	aspartyl-tRNA(Asn)/glutamyl-tRNA(Gln) amidotransferase subunit C (gatC, GATC)	cis-Aconitic acid	Organic acids and derivatives	Carboxylic acids and derivatives	Tricarboxylic acids and derivatives
Glyma.10G214200	M179T343_POS	0.51382	0.0291668	aspartyl-tRNA(Asn)/glutamyl-tRNA(Gln) amidotransferase subunit C (gatC, GATC)	Methylisoeugenol	Benzenoids	Benzene and substituted derivatives	Methoxybenzenes
Glyma.10G214200	M183T520_POS	-0.819415	3.17201e-05	aspartyl-tRNA(Asn)/glutamyl-tRNA(Gln) amidotransferase subunit C (gatC, GATC)	Triethylphosphate	Organic acids and derivatives	Organic phosphoric acids and derivatives	Phosphate esters
Glyma.10G214200	M183T622_NEG	-0.589747	0.00999484	aspartyl-tRNA(Asn)/glutamyl-tRNA(Gln) amidotransferase subunit C (gatC, GATC)	3-phosphooxypyruvate
Glyma.10G214200	M196T784_POS	0.590022	0.00995156	aspartyl-tRNA(Asn)/glutamyl-tRNA(Gln) amidotransferase subunit C (gatC, GATC)	D,L-alpha-methylphosphinothricin
Glyma.10G214200	M203T330_NEG	-0.543056	0.0198615	aspartyl-tRNA(Asn)/glutamyl-tRNA(Gln) amidotransferase subunit C (gatC, GATC)	Solsodomine A	Organoheterocyclic compounds	Pyrroles	Substituted pyrroles
Glyma.10G214200	M204T126_NEG	-0.562688	0.0150556	aspartyl-tRNA(Asn)/glutamyl-tRNA(Gln) amidotransferase subunit C (gatC, GATC)	Pantothenol	Lipids and lipid-like molecules	Fatty Acyls	Fatty amides
Glyma.10G214200	M205T228_NEG	-0.552205	0.0174909	aspartyl-tRNA(Asn)/glutamyl-tRNA(Gln) amidotransferase subunit C (gatC, GATC)	(2S,3R)-3-Hydroxybutane-1,2,3-tricarboxylate	Organic acids and derivatives	Carboxylic acids and derivatives	Tricarboxylic acids and derivatives
Glyma.10G214200	M206T126_POS	-0.500061	0.0345743	aspartyl-tRNA(Asn)/glutamyl-tRNA(Gln) amidotransferase subunit C (gatC, GATC)	Panthenol	Lipids and lipid-like molecules	Fatty Acyls	Fatty amides
Glyma.10G214200	M217T931_POS	0.668276	0.00243342	aspartyl-tRNA(Asn)/glutamyl-tRNA(Gln) amidotransferase subunit C (gatC, GATC)	Lycoperodine 1	Organoheterocyclic compounds	Indoles and derivatives	Pyridoindoles
Glyma.10G214200	M220T74_POS	0.548505	0.0184209	aspartyl-tRNA(Asn)/glutamyl-tRNA(Gln) amidotransferase subunit C (gatC, GATC)	O-Succinyl-L-homoserine	Organic acids and derivatives	Carboxylic acids and derivatives	Amino acids, peptides, and analogues
Glyma.10G214200	M223T934_POS	-0.602576	0.00812947	aspartyl-tRNA(Asn)/glutamyl-tRNA(Gln) amidotransferase subunit C (gatC, GATC)	1,2-Diphenyl-2-buten-1-one	Phenylpropanoids and polyketides	Stilbenes
Glyma.10G214200	M225T351_POS	0.562168	0.0151697	aspartyl-tRNA(Asn)/glutamyl-tRNA(Gln) amidotransferase subunit C (gatC, GATC)	Methyl jasmonate	Lipids and lipid-like molecules	Fatty Acyls	Lineolic acids and derivatives
Glyma.10G214200	M232T226_POS	-0.547523	0.0186742	aspartyl-tRNA(Asn)/glutamyl-tRNA(Gln) amidotransferase subunit C (gatC, GATC)	N-Acetyl-L-2-amino-6-oxopimelate	Organic acids and derivatives	Carboxylic acids and derivatives	Amino acids, peptides, and analogues
Glyma.10G214200	M247T796_NEG	0.529917	0.0237	aspartyl-tRNA(Asn)/glutamyl-tRNA(Gln) amidotransferase subunit C (gatC, GATC)	pyridoxamine 5-phosphate
Glyma.10G214200	M259T824_POS	0.621209	0.00592964	aspartyl-tRNA(Asn)/glutamyl-tRNA(Gln) amidotransferase subunit C (gatC, GATC)	Tetradecanedioic acid	Lipids and lipid-like molecules	Fatty Acyls	Fatty acids and conjugates
Glyma.10G214200	M261T380_POS	-0.712146	0.00091433	aspartyl-tRNA(Asn)/glutamyl-tRNA(Gln) amidotransferase subunit C (gatC, GATC)	S-Methyl-5-thio-D-ribose 1-phosphate	Organic oxygen compounds	Organooxygen compounds	Carbohydrates and carbohydrate conjugates
Glyma.10G214200	M277T769_NEG	-0.511299	0.0301051	aspartyl-tRNA(Asn)/glutamyl-tRNA(Gln) amidotransferase subunit C (gatC, GATC)	(+)-Methyl abscisate	Lipids and lipid-like molecules	Prenol lipids	Sesquiterpenoids
Glyma.10G214200	M288T70_POS	0.518623	0.0274424	aspartyl-tRNA(Asn)/glutamyl-tRNA(Gln) amidotransferase subunit C (gatC, GATC)	(S)-Norlaudanosoline	Organoheterocyclic compounds	Isoquinolines and derivatives	Benzylisoquinolines
Glyma.10G214200	M301T753_POS	0.635539	0.00458978	aspartyl-tRNA(Asn)/glutamyl-tRNA(Gln) amidotransferase subunit C (gatC, GATC)	Oryzalexin C	Lipids and lipid-like molecules	Prenol lipids	Diterpenoids
Glyma.10G214200	M308T421_POS	0.520987	0.0266234	aspartyl-tRNA(Asn)/glutamyl-tRNA(Gln) amidotransferase subunit C (gatC, GATC)	Dihydroascorbigen	Organoheterocyclic compounds	Indoles and derivatives	Indoles
Glyma.10G214200	M314T150_NEG	0.502382	0.0336118	aspartyl-tRNA(Asn)/glutamyl-tRNA(Gln) amidotransferase subunit C (gatC, GATC)	Citpressine II	Organoheterocyclic compounds	Quinolines and derivatives	Benzoquinolines
Glyma.10G214200	M321T508_POS	0.504815	0.0326253	aspartyl-tRNA(Asn)/glutamyl-tRNA(Gln) amidotransferase subunit C (gatC, GATC)	Dihydromyricetin	Phenylpropanoids and polyketides	Flavonoids	Flavans
Glyma.10G214200	M326T442_POS	-0.620339	0.00602025	aspartyl-tRNA(Asn)/glutamyl-tRNA(Gln) amidotransferase subunit C (gatC, GATC)	Farnesylcysteine	Lipids and lipid-like molecules	Prenol lipids	Sesquiterpenoids
Glyma.10G214200	M337T69_POS	0.534869	0.0221906	aspartyl-tRNA(Asn)/glutamyl-tRNA(Gln) amidotransferase subunit C (gatC, GATC)	5-O-Caffeoylshikimic acid	Phenylpropanoids and polyketides	Cinnamic acids and derivatives	Hydroxycinnamic acids and derivatives
Glyma.10G214200	M353T150_POS	0.567595	0.0140124	aspartyl-tRNA(Asn)/glutamyl-tRNA(Gln) amidotransferase subunit C (gatC, GATC)	Arbutin 6-phosphate	Organic oxygen compounds	Organooxygen compounds	Carbohydrates and carbohydrate conjugates
Glyma.10G214200	M353T649_1_POS	0.556169	0.016536	aspartyl-tRNA(Asn)/glutamyl-tRNA(Gln) amidotransferase subunit C (gatC, GATC)	Citrusinol	Phenylpropanoids and polyketides	Flavonoids	Pyranoflavonoids
Glyma.10G214200	M355T329_NEG	-0.572236	0.0130795	aspartyl-tRNA(Asn)/glutamyl-tRNA(Gln) amidotransferase subunit C (gatC, GATC)	5-amino-6-(5-phospho-D-ribitylamino)uracil
Glyma.10G214200	M371T648_POS	0.595936	0.00905626	aspartyl-tRNA(Asn)/glutamyl-tRNA(Gln) amidotransferase subunit C (gatC, GATC)	4,4'-Bis(2-carboxyvinyl)-3,3'-dimethoxydiphenyl ether	Benzenoids	Benzene and substituted derivatives	Diphenylethers
Glyma.10G214200	M375T511_POS	0.511246	0.0301249	aspartyl-tRNA(Asn)/glutamyl-tRNA(Gln) amidotransferase subunit C (gatC, GATC)	Deoxyloganin	Lipids and lipid-like molecules	Prenol lipids	Terpene glycosides
Glyma.10G214200	M398T511_POS	0.572875	0.012955	aspartyl-tRNA(Asn)/glutamyl-tRNA(Gln) amidotransferase subunit C (gatC, GATC)	2-Methylthioribosyl-trans-zeatin	Nucleosides, nucleotides, and analogues	Purine nucleosides
Glyma.10G214200	M419T480_POS	-0.514686	0.02885	aspartyl-tRNA(Asn)/glutamyl-tRNA(Gln) amidotransferase subunit C (gatC, GATC)	(+)-Lirioresinol B	Lignans, neolignans and related compounds	Furanoid lignans
Glyma.10G214200	M429T236_POS	-0.632117	0.00488476	aspartyl-tRNA(Asn)/glutamyl-tRNA(Gln) amidotransferase subunit C (gatC, GATC)	IDP
Glyma.10G214200	M435T293_POS	-0.558902	0.015902	aspartyl-tRNA(Asn)/glutamyl-tRNA(Gln) amidotransferase subunit C (gatC, GATC)	Naringenin 5-O-glucoside	Phenylpropanoids and polyketides	Flavonoids	Flavonoid glycosides
Glyma.10G214200	M444T605_POS	-0.515548	0.028537	aspartyl-tRNA(Asn)/glutamyl-tRNA(Gln) amidotransferase subunit C (gatC, GATC)	Proansamitocin	Phenylpropanoids and polyketides	Macrolactams	NA
Glyma.10G214200	M482T944_NEG	0.634805	0.00465182	aspartyl-tRNA(Asn)/glutamyl-tRNA(Gln) amidotransferase subunit C (gatC, GATC)	C31-phthiodiolone A
Glyma.10G214200	M484T944_NEG	0.645028	0.00384697	aspartyl-tRNA(Asn)/glutamyl-tRNA(Gln) amidotransferase subunit C (gatC, GATC)	C31-phthiotriol
Glyma.10G214200	M505T68_NEG	-0.502777	0.03345	aspartyl-tRNA(Asn)/glutamyl-tRNA(Gln) amidotransferase subunit C (gatC, GATC)	2-Decarboxybetanin	Organic oxygen compounds	Organooxygen compounds	Carbohydrates and carbohydrate conjugates
Glyma.10G214200	M508T508_POS	0.521624	0.0264061	aspartyl-tRNA(Asn)/glutamyl-tRNA(Gln) amidotransferase subunit C (gatC, GATC)	Delphinidin 3-(6''-acetylglucoside)	Phenylpropanoids and polyketides	Flavonoids	Flavonoid glycosides
Glyma.10G214200	M522T522_POS	-0.614594	0.00664708	aspartyl-tRNA(Asn)/glutamyl-tRNA(Gln) amidotransferase subunit C (gatC, GATC)	Petunidin 3-(6''-acetylglucoside)
Glyma.10G214200	M543T526_POS	0.543922	0.0196268	aspartyl-tRNA(Asn)/glutamyl-tRNA(Gln) amidotransferase subunit C (gatC, GATC)	Chaetoglobosin N	Alkaloids and derivatives	Cytochalasans	Chaetoglobosins
Glyma.10G214200	M632T309_2_POS	-0.609728	0.00721831	aspartyl-tRNA(Asn)/glutamyl-tRNA(Gln) amidotransferase subunit C (gatC, GATC)	3,4-dihydroxy-5-all-trans-heptaprenylbenzoate
Glyma.10G214200	M653T439_NEG	-0.510698	0.0303321	aspartyl-tRNA(Asn)/glutamyl-tRNA(Gln) amidotransferase subunit C (gatC, GATC)	Campneoside I	Phenylpropanoids and polyketides	Cinnamic acids and derivatives	Hydroxycinnamic acids and derivatives
Glyma.10G214200	M682T453_NEG	-0.606382	0.00763372	aspartyl-tRNA(Asn)/glutamyl-tRNA(Gln) amidotransferase subunit C (gatC, GATC)	27-O-Demethylrifamycin SV	Phenylpropanoids and polyketides	Macrolactams	NA
Glyma.10G214200	M723T405_3_POS	-0.593048	0.009485	aspartyl-tRNA(Asn)/glutamyl-tRNA(Gln) amidotransferase subunit C (gatC, GATC)	trypanothione
Glyma.10G214200	M767T702_POS	0.525303	0.0251773	aspartyl-tRNA(Asn)/glutamyl-tRNA(Gln) amidotransferase subunit C (gatC, GATC)	Soyasaponin IV	Lipids and lipid-like molecules	Prenol lipids	Terpene glycosides
Glyma.10G214200	M793T393_2_POS	-0.579318	0.0117517	aspartyl-tRNA(Asn)/glutamyl-tRNA(Gln) amidotransferase subunit C (gatC, GATC)	Betavulgaroside II	Lipids and lipid-like molecules	Prenol lipids	Triterpenoids
Glyma.10G214200	M908T548_POS	-0.573558	0.0128228	aspartyl-tRNA(Asn)/glutamyl-tRNA(Gln) amidotransferase subunit C (gatC, GATC)	Chlorophyll b
Glyma.14G101500	M1028T698_NEG	0.607497	0.00749329	ASPARTYL/LYSYL-TRNA SYNTHETASE // ASPARTATE--TRNA LIGASE, CYTOPLASMIC	3-(4'O-Malonyl)Rha(1-2)Gal(1-2)GluA-Soyasaponenol B	Lipids and lipid-like molecules	Prenol lipids	Terpene glycosides
Glyma.14G101500	M1030T697_NEG	0.598026	0.00875581	ASPARTYL/LYSYL-TRNA SYNTHETASE // ASPARTATE--TRNA LIGASE, CYTOPLASMIC	Solasodoside A	Lipids and lipid-like molecules	Steroids and steroid derivatives	Steroidal glycosides
Glyma.14G101500	M1031T697_NEG	0.588763	0.010151	ASPARTYL/LYSYL-TRNA SYNTHETASE // ASPARTATE--TRNA LIGASE, CYTOPLASMIC	Dehydrotomatine	Lipids and lipid-like molecules	Steroids and steroid derivatives	Steroidal glycosides
Glyma.14G101500	M1050T685_NEG	0.533692	0.0225423	ASPARTYL/LYSYL-TRNA SYNTHETASE // ASPARTATE--TRNA LIGASE, CYTOPLASMIC	Solanigroside G	Lipids and lipid-like molecules	Steroids and steroid derivatives	Steroidal glycosides
Glyma.14G101500	M108T165_POS	-0.508005	0.0313656	ASPARTYL/LYSYL-TRNA SYNTHETASE // ASPARTATE--TRNA LIGASE, CYTOPLASMIC	o-Toluidine	Benzenoids	Benzene and substituted derivatives	Toluenes
Glyma.14G101500	M114T73_POS	-0.638331	0.00436005	ASPARTYL/LYSYL-TRNA SYNTHETASE // ASPARTATE--TRNA LIGASE, CYTOPLASMIC	(S)-1-Pyrroline-5-carboxylate	Organic acids and derivatives	Carboxylic acids and derivatives	Amino acids, peptides, and analogues
Glyma.14G101500	M115T75_NEG	-0.647888	0.00364344	ASPARTYL/LYSYL-TRNA SYNTHETASE // ASPARTATE--TRNA LIGASE, CYTOPLASMIC	Maleic acid	Organic acids and derivatives	Carboxylic acids and derivatives	Dicarboxylic acids and derivatives
Glyma.14G101500	M120T938_POS	0.578297	0.0119362	ASPARTYL/LYSYL-TRNA SYNTHETASE // ASPARTATE--TRNA LIGASE, CYTOPLASMIC	N-Carboxyglycine	Organic acids and derivatives	Carboxylic acids and derivatives	Amino acids, peptides, and analogues
Glyma.14G101500	M125T937_POS	-0.505779	0.0322404	ASPARTYL/LYSYL-TRNA SYNTHETASE // ASPARTATE--TRNA LIGASE, CYTOPLASMIC	3-chloro-L-alanine
Glyma.14G101500	M129T909_POS	-0.585088	0.0107517	ASPARTYL/LYSYL-TRNA SYNTHETASE // ASPARTATE--TRNA LIGASE, CYTOPLASMIC	3-Octanone	Organic oxygen compounds	Organooxygen compounds	Carbonyl compounds
Glyma.14G101500	M136T97_POS	-0.505511	0.0323471	ASPARTYL/LYSYL-TRNA SYNTHETASE // ASPARTATE--TRNA LIGASE, CYTOPLASMIC	2-Phenylacetamide	Benzenoids	Benzene and substituted derivatives	Phenylacetamides
Glyma.14G101500	M142T225_POS	0.564931	0.0145713	ASPARTYL/LYSYL-TRNA SYNTHETASE // ASPARTATE--TRNA LIGASE, CYTOPLASMIC	O-phosphoethanolamine
Glyma.14G101500	M143T615_POS	-0.56668	0.0142025	ASPARTYL/LYSYL-TRNA SYNTHETASE // ASPARTATE--TRNA LIGASE, CYTOPLASMIC	Nonadienal	Organic oxygen compounds	Organooxygen compounds	Carbonyl compounds
Glyma.14G101500	M148T929_NEG	-0.673626	0.00217799	ASPARTYL/LYSYL-TRNA SYNTHETASE // ASPARTATE--TRNA LIGASE, CYTOPLASMIC	Benzyl isothiocyanate	Benzenoids	Benzene and substituted derivatives
Glyma.14G101500	M151T74_POS	-0.592712	0.00953586	ASPARTYL/LYSYL-TRNA SYNTHETASE // ASPARTATE--TRNA LIGASE, CYTOPLASMIC	Bis(1-methylethyl) disulfide	Organosulfur compounds	Organic disulfides	Dialkyldisulfides
Glyma.14G101500	M162T842_POS	-0.616823	0.00639789	ASPARTYL/LYSYL-TRNA SYNTHETASE // ASPARTATE--TRNA LIGASE, CYTOPLASMIC	N-Formyl-L-aspartate	Organic acids and derivatives	Carboxylic acids and derivatives	Amino acids, peptides, and analogues
Glyma.14G101500	M166T709_NEG	-0.542047	0.0201375	ASPARTYL/LYSYL-TRNA SYNTHETASE // ASPARTATE--TRNA LIGASE, CYTOPLASMIC	Quinolinate	Organoheterocyclic compounds	Pyridines and derivatives	Pyridinecarboxylic acids and derivatives
Glyma.14G101500	M167T929_NEG	-0.709896	0.000965411	ASPARTYL/LYSYL-TRNA SYNTHETASE // ASPARTATE--TRNA LIGASE, CYTOPLASMIC	Butanoylphosphate	Organic acids and derivatives	Organic phosphoric acids and derivatives	Phosphate esters
Glyma.14G101500	M170T685_POS	-0.520745	0.0267066	ASPARTYL/LYSYL-TRNA SYNTHETASE // ASPARTATE--TRNA LIGASE, CYTOPLASMIC	L-cysteate
Glyma.14G101500	M173T928_NEG	-0.586359	0.0105407	ASPARTYL/LYSYL-TRNA SYNTHETASE // ASPARTATE--TRNA LIGASE, CYTOPLASMIC	cis-Aconitic acid	Organic acids and derivatives	Carboxylic acids and derivatives	Tricarboxylic acids and derivatives
Glyma.14G101500	M176T586_POS	-0.599626	0.00853128	ASPARTYL/LYSYL-TRNA SYNTHETASE // ASPARTATE--TRNA LIGASE, CYTOPLASMIC	Sulforaphene	Organosulfur compounds	Sulfoxides
Glyma.14G101500	M183T520_POS	0.783036	0.000121761	ASPARTYL/LYSYL-TRNA SYNTHETASE // ASPARTATE--TRNA LIGASE, CYTOPLASMIC	Triethylphosphate	Organic acids and derivatives	Organic phosphoric acids and derivatives	Phosphate esters
Glyma.14G101500	M183T622_NEG	0.651542	0.00339636	ASPARTYL/LYSYL-TRNA SYNTHETASE // ASPARTATE--TRNA LIGASE, CYTOPLASMIC	3-phosphooxypyruvate
Glyma.14G101500	M183T653_NEG	0.514608	0.0288784	ASPARTYL/LYSYL-TRNA SYNTHETASE // ASPARTATE--TRNA LIGASE, CYTOPLASMIC	3-Nonen-1-yl acetate	Lipids and lipid-like molecules	Fatty Acyls	Fatty alcohol esters
Glyma.14G101500	M183T78_POS	-0.634969	0.00463784	ASPARTYL/LYSYL-TRNA SYNTHETASE // ASPARTATE--TRNA LIGASE, CYTOPLASMIC	2-Oxo-4-phosphonobutanoate	Organic acids and derivatives	Keto acids and derivatives	Short-chain keto acids and derivatives
Glyma.14G101500	M187T1029_POS	-0.604163	0.00791971	ASPARTYL/LYSYL-TRNA SYNTHETASE // ASPARTATE--TRNA LIGASE, CYTOPLASMIC	iodoacetate
Glyma.14G101500	M193T430_POS	-0.749451	0.000343109	ASPARTYL/LYSYL-TRNA SYNTHETASE // ASPARTATE--TRNA LIGASE, CYTOPLASMIC	Coumaryl acetate	Benzenoids	Benzene and substituted derivatives	Styrenes
Glyma.14G101500	M196T784_POS	-0.514535	0.028905	ASPARTYL/LYSYL-TRNA SYNTHETASE // ASPARTATE--TRNA LIGASE, CYTOPLASMIC	D,L-alpha-methylphosphinothricin
Glyma.14G101500	M199T909_POS	-0.561192	0.0153857	ASPARTYL/LYSYL-TRNA SYNTHETASE // ASPARTATE--TRNA LIGASE, CYTOPLASMIC	Citronellyl acetate	Lipids and lipid-like molecules	Fatty Acyls	Fatty alcohol esters
Glyma.14G101500	M204T126_NEG	0.501179	0.0341079	ASPARTYL/LYSYL-TRNA SYNTHETASE // ASPARTATE--TRNA LIGASE, CYTOPLASMIC	Pantothenol	Lipids and lipid-like molecules	Fatty Acyls	Fatty amides
Glyma.14G101500	M205T228_NEG	0.651779	0.00338084	ASPARTYL/LYSYL-TRNA SYNTHETASE // ASPARTATE--TRNA LIGASE, CYTOPLASMIC	(2S,3R)-3-Hydroxybutane-1,2,3-tricarboxylate	Organic acids and derivatives	Carboxylic acids and derivatives	Tricarboxylic acids and derivatives
Glyma.14G101500	M205T839_2_POS	-0.514972	0.0287459	ASPARTYL/LYSYL-TRNA SYNTHETASE // ASPARTATE--TRNA LIGASE, CYTOPLASMIC	(+)-Cyclosativene	Lipids and lipid-like molecules	Prenol lipids	Sesquiterpenoids
Glyma.14G101500	M205T864_POS	-0.534879	0.0221875	ASPARTYL/LYSYL-TRNA SYNTHETASE // ASPARTATE--TRNA LIGASE, CYTOPLASMIC	Pentalenene	Lipids and lipid-like molecules	Prenol lipids	Sesquiterpenoids
Glyma.14G101500	M205T928_NEG	-0.554126	0.0170228	ASPARTYL/LYSYL-TRNA SYNTHETASE // ASPARTATE--TRNA LIGASE, CYTOPLASMIC	3-Oxalomalate	Organic acids and derivatives	Carboxylic acids and derivatives	Tricarboxylic acids and derivatives
Glyma.14G101500	M215T194_POS	0.509565	0.0307638	ASPARTYL/LYSYL-TRNA SYNTHETASE // ASPARTATE--TRNA LIGASE, CYTOPLASMIC	Dethiobiotin	Lipids and lipid-like molecules	Fatty Acyls	Fatty acids and conjugates
Glyma.14G101500	M217T931_POS	-0.523772	0.025683	ASPARTYL/LYSYL-TRNA SYNTHETASE // ASPARTATE--TRNA LIGASE, CYTOPLASMIC	Lycoperodine 1	Organoheterocyclic compounds	Indoles and derivatives	Pyridoindoles
Glyma.14G101500	M219T744_POS	-0.50483	0.0326192	ASPARTYL/LYSYL-TRNA SYNTHETASE // ASPARTATE--TRNA LIGASE, CYTOPLASMIC	(+)-Nootkatone	Lipids and lipid-like molecules	Prenol lipids	Sesquiterpenoids
Glyma.14G101500	M220T74_POS	-0.502497	0.0335644	ASPARTYL/LYSYL-TRNA SYNTHETASE // ASPARTATE--TRNA LIGASE, CYTOPLASMIC	O-Succinyl-L-homoserine	Organic acids and derivatives	Carboxylic acids and derivatives	Amino acids, peptides, and analogues
Glyma.14G101500	M225T351_POS	-0.623226	0.00572393	ASPARTYL/LYSYL-TRNA SYNTHETASE // ASPARTATE--TRNA LIGASE, CYTOPLASMIC	Methyl jasmonate	Lipids and lipid-like molecules	Fatty Acyls	Lineolic acids and derivatives
Glyma.14G101500	M232T226_POS	0.525139	0.025231	ASPARTYL/LYSYL-TRNA SYNTHETASE // ASPARTATE--TRNA LIGASE, CYTOPLASMIC	N-Acetyl-L-2-amino-6-oxopimelate	Organic acids and derivatives	Carboxylic acids and derivatives	Amino acids, peptides, and analogues
Glyma.14G101500	M237T431_POS	-0.572441	0.0130394	ASPARTYL/LYSYL-TRNA SYNTHETASE // ASPARTATE--TRNA LIGASE, CYTOPLASMIC	Capsidiol	Lipids and lipid-like molecules	Prenol lipids	Sesquiterpenoids
Glyma.14G101500	M238T70_POS	0.574064	0.0127259	ASPARTYL/LYSYL-TRNA SYNTHETASE // ASPARTATE--TRNA LIGASE, CYTOPLASMIC	S-succinylcysteine	Organic acids and derivatives	Carboxylic acids and derivatives	Amino acids, peptides, and analogues
Glyma.14G101500	M242T718_POS	-0.617612	0.00631148	ASPARTYL/LYSYL-TRNA SYNTHETASE // ASPARTATE--TRNA LIGASE, CYTOPLASMIC	dimethyl(tetradecyl)amine	Organic nitrogen compounds	Organonitrogen compounds	Amines
Glyma.14G101500	M243T798_NEG	0.639854	0.0042387	ASPARTYL/LYSYL-TRNA SYNTHETASE // ASPARTATE--TRNA LIGASE, CYTOPLASMIC	beta-Hydroxymyristic acid	Lipids and lipid-like molecules	Fatty Acyls	Fatty acids and conjugates
Glyma.14G101500	M246T522_NEG	0.513521	0.029277	ASPARTYL/LYSYL-TRNA SYNTHETASE // ASPARTATE--TRNA LIGASE, CYTOPLASMIC	pyridoxal 5-phosphate
Glyma.14G101500	M247T379_NEG	0.518858	0.0273601	ASPARTYL/LYSYL-TRNA SYNTHETASE // ASPARTATE--TRNA LIGASE, CYTOPLASMIC	Prenyl glucoside	Lipids and lipid-like molecules	Fatty Acyls	Fatty acyl glycosides
Glyma.14G101500	M247T796_NEG	-0.666326	0.00253242	ASPARTYL/LYSYL-TRNA SYNTHETASE // ASPARTATE--TRNA LIGASE, CYTOPLASMIC	pyridoxamine 5-phosphate
Glyma.14G101500	M249T727_NEG	0.684391	0.00173072	ASPARTYL/LYSYL-TRNA SYNTHETASE // ASPARTATE--TRNA LIGASE, CYTOPLASMIC	Viscic acid	Lipids and lipid-like molecules	Prenol lipids	Sesquiterpenoids
Glyma.14G101500	M259T824_POS	-0.535827	0.0219073	ASPARTYL/LYSYL-TRNA SYNTHETASE // ASPARTATE--TRNA LIGASE, CYTOPLASMIC	Tetradecanedioic acid	Lipids and lipid-like molecules	Fatty Acyls	Fatty acids and conjugates
Glyma.14G101500	M260T414_NEG	0.533145	0.0227073	ASPARTYL/LYSYL-TRNA SYNTHETASE // ASPARTATE--TRNA LIGASE, CYTOPLASMIC	Lotaustralin	Organic oxygen compounds	Organooxygen compounds	Carbohydrates and carbohydrate conjugates
Glyma.14G101500	M261T928_NEG	-0.580838	0.0114814	ASPARTYL/LYSYL-TRNA SYNTHETASE // ASPARTATE--TRNA LIGASE, CYTOPLASMIC	5-Methoxy-2-(methylthio)-1,3-thiazino[6,5-b]indole	Organoheterocyclic compounds	Indoles and derivatives	Indoles
Glyma.14G101500	M263T537_NEG	0.544239	0.0195414	ASPARTYL/LYSYL-TRNA SYNTHETASE // ASPARTATE--TRNA LIGASE, CYTOPLASMIC	Formyl-N-acetyl-5-methoxykynurenamine	Organic oxygen compounds	Organooxygen compounds	Carbonyl compounds
Glyma.14G101500	M267T518_POS	-0.583849	0.0109604	ASPARTYL/LYSYL-TRNA SYNTHETASE // ASPARTATE--TRNA LIGASE, CYTOPLASMIC	3,14-Dihydroxy-11,13-dihydrocostunolide	Lipids and lipid-like molecules	Prenol lipids	Terpene lactones
Glyma.14G101500	M269T389_NEG	0.590482	0.00987941	ASPARTYL/LYSYL-TRNA SYNTHETASE // ASPARTATE--TRNA LIGASE, CYTOPLASMIC	4',6,7-Trihydroxyisoflavone	Phenylpropanoids and polyketides	Isoflavonoids	Isoflav-2-enes
Glyma.14G101500	M275T704_2_POS	-0.595316	0.00914691	ASPARTYL/LYSYL-TRNA SYNTHETASE // ASPARTATE--TRNA LIGASE, CYTOPLASMIC	apiforol
Glyma.14G101500	M277T74_POS	-0.525073	0.0252528	ASPARTYL/LYSYL-TRNA SYNTHETASE // ASPARTATE--TRNA LIGASE, CYTOPLASMIC	6-Phosphogluconic acid	Organic oxygen compounds	Organooxygen compounds	Carbohydrates and carbohydrate conjugates
Glyma.14G101500	M277T769_NEG	0.528039	0.0242928	ASPARTYL/LYSYL-TRNA SYNTHETASE // ASPARTATE--TRNA LIGASE, CYTOPLASMIC	(+)-Methyl abscisate	Lipids and lipid-like molecules	Prenol lipids	Sesquiterpenoids
Glyma.14G101500	M285T569_POS	-0.559572	0.0157496	ASPARTYL/LYSYL-TRNA SYNTHETASE // ASPARTATE--TRNA LIGASE, CYTOPLASMIC	Glycitein	Phenylpropanoids and polyketides	Isoflavonoids	Isoflav-2-enes
Glyma.14G101500	M302T727_POS	-0.540433	0.0205855	ASPARTYL/LYSYL-TRNA SYNTHETASE // ASPARTATE--TRNA LIGASE, CYTOPLASMIC	Sphinganine	Organic nitrogen compounds	Organonitrogen compounds	Amines
Glyma.14G101500	M303T499_3_POS	-0.631745	0.0049177	ASPARTYL/LYSYL-TRNA SYNTHETASE // ASPARTATE--TRNA LIGASE, CYTOPLASMIC	Abietic acid	Lipids and lipid-like molecules	Prenol lipids	Diterpenoids
Glyma.14G101500	M303T840_NEG	-0.69516	0.00136218	ASPARTYL/LYSYL-TRNA SYNTHETASE // ASPARTATE--TRNA LIGASE, CYTOPLASMIC	Discadenine	Organic acids and derivatives	Carboxylic acids and derivatives	Amino acids, peptides, and analogues
Glyma.14G101500	M305T440_POS	0.572258	0.0130751	ASPARTYL/LYSYL-TRNA SYNTHETASE // ASPARTATE--TRNA LIGASE, CYTOPLASMIC	Nopaline	Organic acids and derivatives	Carboxylic acids and derivatives	Amino acids, peptides, and analogues
Glyma.14G101500	M308T421_POS	-0.59032	0.00990476	ASPARTYL/LYSYL-TRNA SYNTHETASE // ASPARTATE--TRNA LIGASE, CYTOPLASMIC	Dihydroascorbigen	Organoheterocyclic compounds	Indoles and derivatives	Indoles
Glyma.14G101500	M313T734_NEG	0.568656	0.0137947	ASPARTYL/LYSYL-TRNA SYNTHETASE // ASPARTATE--TRNA LIGASE, CYTOPLASMIC	12,13-DHOME	Lipids and lipid-like molecules	Fatty Acyls	Fatty acids and conjugates
Glyma.14G101500	M320T682_POS	-0.55203	0.0175339	ASPARTYL/LYSYL-TRNA SYNTHETASE // ASPARTATE--TRNA LIGASE, CYTOPLASMIC	Norfloxacin	Organoheterocyclic compounds	Quinolines and derivatives	Quinoline carboxylic acids
Glyma.14G101500	M322T702_NEG	0.634676	0.00466277	ASPARTYL/LYSYL-TRNA SYNTHETASE // ASPARTATE--TRNA LIGASE, CYTOPLASMIC	(-)-Jasmonoyl-L-isoleucine	Organic acids and derivatives	Carboxylic acids and derivatives	Amino acids, peptides, and analogues
Glyma.14G101500	M326T442_POS	0.56815	0.0138982	ASPARTYL/LYSYL-TRNA SYNTHETASE // ASPARTATE--TRNA LIGASE, CYTOPLASMIC	Farnesylcysteine	Lipids and lipid-like molecules	Prenol lipids	Sesquiterpenoids
Glyma.14G101500	M327T653_NEG	0.638428	0.0043522	ASPARTYL/LYSYL-TRNA SYNTHETASE // ASPARTATE--TRNA LIGASE, CYTOPLASMIC	CIF 2	Organic acids and derivatives	Carboxylic acids and derivatives	Amino acids, peptides, and analogues
Glyma.14G101500	M331T724_POS	0.502192	0.0336896	ASPARTYL/LYSYL-TRNA SYNTHETASE // ASPARTATE--TRNA LIGASE, CYTOPLASMIC	(7Z,10Z,13Z,16Z,19Z)-Docosapentaenoic acid	Lipids and lipid-like molecules	Fatty Acyls	Fatty acids and conjugates
Glyma.14G101500	M335T325_POS	-0.500239	0.0344997	ASPARTYL/LYSYL-TRNA SYNTHETASE // ASPARTATE--TRNA LIGASE, CYTOPLASMIC	N,N'-Diacetyllegionaminate	Organic oxygen compounds	Organooxygen compounds	Carbohydrates and carbohydrate conjugates
Glyma.14G101500	M337T69_POS	-0.503589	0.0331196	ASPARTYL/LYSYL-TRNA SYNTHETASE // ASPARTATE--TRNA LIGASE, CYTOPLASMIC	5-O-Caffeoylshikimic acid	Phenylpropanoids and polyketides	Cinnamic acids and derivatives	Hydroxycinnamic acids and derivatives
Glyma.14G101500	M337T840_NEG	-0.523359	0.0258209	ASPARTYL/LYSYL-TRNA SYNTHETASE // ASPARTATE--TRNA LIGASE, CYTOPLASMIC	8-Geranyloxypsoralen	Lipids and lipid-like molecules	Prenol lipids	Terpene lactones
Glyma.14G101500	M338T840_NEG	-0.657171	0.00304276	ASPARTYL/LYSYL-TRNA SYNTHETASE // ASPARTATE--TRNA LIGASE, CYTOPLASMIC	Yukomine	Organoheterocyclic compounds	Quinolines and derivatives	Benzoquinolines
Glyma.14G101500	M339T419_POS	-0.681001	0.00186249	ASPARTYL/LYSYL-TRNA SYNTHETASE // ASPARTATE--TRNA LIGASE, CYTOPLASMIC	1-Caffeoyl-4-deoxyquinic acid	Phenylpropanoids and polyketides	Cinnamic acids and derivatives	Hydroxycinnamic acids and derivatives
Glyma.14G101500	M345T433_POS	-0.517103	0.0279794	ASPARTYL/LYSYL-TRNA SYNTHETASE // ASPARTATE--TRNA LIGASE, CYTOPLASMIC	Melibiitol	Lipids and lipid-like molecules	Fatty Acyls	Fatty acyl glycosides
Glyma.14G101500	M347T786_POS	0.56383	0.0148076	ASPARTYL/LYSYL-TRNA SYNTHETASE // ASPARTATE--TRNA LIGASE, CYTOPLASMIC	Corticosterone	Lipids and lipid-like molecules	Steroids and steroid derivatives	Hydroxysteroids
Glyma.14G101500	M349T687_POS	0.550471	0.0179222	ASPARTYL/LYSYL-TRNA SYNTHETASE // ASPARTATE--TRNA LIGASE, CYTOPLASMIC	Gibberellin A111	Lipids and lipid-like molecules	Prenol lipids	Diterpenoids
Glyma.14G101500	M353T150_POS	-0.545137	0.0193012	ASPARTYL/LYSYL-TRNA SYNTHETASE // ASPARTATE--TRNA LIGASE, CYTOPLASMIC	Arbutin 6-phosphate	Organic oxygen compounds	Organooxygen compounds	Carbohydrates and carbohydrate conjugates
Glyma.14G101500	M353T649_1_POS	-0.809643	4.67905e-05	ASPARTYL/LYSYL-TRNA SYNTHETASE // ASPARTATE--TRNA LIGASE, CYTOPLASMIC	Citrusinol	Phenylpropanoids and polyketides	Flavonoids	Pyranoflavonoids
Glyma.14G101500	M355T329_NEG	0.521615	0.026409	ASPARTYL/LYSYL-TRNA SYNTHETASE // ASPARTATE--TRNA LIGASE, CYTOPLASMIC	5-amino-6-(5-phospho-D-ribitylamino)uracil
Glyma.14G101500	M356T767_POS	-0.542311	0.0200649	ASPARTYL/LYSYL-TRNA SYNTHETASE // ASPARTATE--TRNA LIGASE, CYTOPLASMIC	Arachidoyl Ethanolamide	Organic nitrogen compounds	Organonitrogen compounds	Amines
Glyma.14G101500	M371T648_POS	-0.736407	0.000492139	ASPARTYL/LYSYL-TRNA SYNTHETASE // ASPARTATE--TRNA LIGASE, CYTOPLASMIC	4,4'-Bis(2-carboxyvinyl)-3,3'-dimethoxydiphenyl ether	Benzenoids	Benzene and substituted derivatives	Diphenylethers
Glyma.14G101500	M373T732_POS	0.570874	0.0133481	ASPARTYL/LYSYL-TRNA SYNTHETASE // ASPARTATE--TRNA LIGASE, CYTOPLASMIC	5,7,2',3',4'-Pentamethoxyflavone	Phenylpropanoids and polyketides	Flavonoids	O-methylated flavonoids
Glyma.14G101500	M375T511_POS	-0.500198	0.0345167	ASPARTYL/LYSYL-TRNA SYNTHETASE // ASPARTATE--TRNA LIGASE, CYTOPLASMIC	Deoxyloganin	Lipids and lipid-like molecules	Prenol lipids	Terpene glycosides
Glyma.14G101500	M380T351_POS	-0.530821	0.0234184	ASPARTYL/LYSYL-TRNA SYNTHETASE // ASPARTATE--TRNA LIGASE, CYTOPLASMIC	Oryzamutaic acid H	Organoheterocyclic compounds	Diazanaphthalenes	Naphthyridines
Glyma.14G101500	M384T368_NEG	-0.548736	0.0183619	ASPARTYL/LYSYL-TRNA SYNTHETASE // ASPARTATE--TRNA LIGASE, CYTOPLASMIC	Buntanmine A	Organoheterocyclic compounds	Quinolines and derivatives	Benzoquinolines
Glyma.14G101500	M402T364_POS	-0.57558	0.0124383	ASPARTYL/LYSYL-TRNA SYNTHETASE // ASPARTATE--TRNA LIGASE, CYTOPLASMIC	Moxifloxacin	Organoheterocyclic compounds	Quinolines and derivatives	Quinoline carboxylic acids
Glyma.14G101500	M413T465_2_POS	-0.51887	0.0273562	ASPARTYL/LYSYL-TRNA SYNTHETASE // ASPARTATE--TRNA LIGASE, CYTOPLASMIC	Valenciachrome	Lipids and lipid-like molecules	Prenol lipids	Diterpenoids
Glyma.14G101500	M429T236_POS	0.564706	0.0146195	ASPARTYL/LYSYL-TRNA SYNTHETASE // ASPARTATE--TRNA LIGASE, CYTOPLASMIC	IDP
Glyma.14G101500	M449T412_POS	0.524853	0.025325	ASPARTYL/LYSYL-TRNA SYNTHETASE // ASPARTATE--TRNA LIGASE, CYTOPLASMIC	Acuminoside	Lipids and lipid-like molecules	Prenol lipids	Terpene glycosides
Glyma.14G101500	M461T439_NEG	0.522068	0.0262554	ASPARTYL/LYSYL-TRNA SYNTHETASE // ASPARTATE--TRNA LIGASE, CYTOPLASMIC	gamma-L-Glutamyl-S-(hercyn-2-yl)-L-cysteine S-oxide	Organic acids and derivatives	Carboxylic acids and derivatives	Amino acids, peptides, and analogues
Glyma.14G101500	M462T445_POS	-0.64	0.00422719	ASPARTYL/LYSYL-TRNA SYNTHETASE // ASPARTATE--TRNA LIGASE, CYTOPLASMIC	D-Glucosylsphingosine	Lipids and lipid-like molecules	Sphingolipids	Glycosphingolipids
Glyma.14G101500	M473T327_POS	-0.500645	0.0343298	ASPARTYL/LYSYL-TRNA SYNTHETASE // ASPARTATE--TRNA LIGASE, CYTOPLASMIC	Isoobacunoic acid	Lipids and lipid-like molecules	Steroids and steroid derivatives	Steroid lactones
Glyma.14G101500	M477T422_POS	-0.566102	0.0143235	ASPARTYL/LYSYL-TRNA SYNTHETASE // ASPARTATE--TRNA LIGASE, CYTOPLASMIC	(L-glutamyl)adenylate
Glyma.14G101500	M482T944_NEG	-0.637869	0.00439736	ASPARTYL/LYSYL-TRNA SYNTHETASE // ASPARTATE--TRNA LIGASE, CYTOPLASMIC	C31-phthiodiolone A
Glyma.14G101500	M483T518_POS	-0.538591	0.0211064	ASPARTYL/LYSYL-TRNA SYNTHETASE // ASPARTATE--TRNA LIGASE, CYTOPLASMIC	Gentamicin X2	Organic oxygen compounds	Organooxygen compounds	Carbohydrates and carbohydrate conjugates
Glyma.14G101500	M484T944_NEG	-0.644066	0.00391743	ASPARTYL/LYSYL-TRNA SYNTHETASE // ASPARTATE--TRNA LIGASE, CYTOPLASMIC	C31-phthiotriol
Glyma.14G101500	M496T670_POS	-0.599265	0.00858153	ASPARTYL/LYSYL-TRNA SYNTHETASE // ASPARTATE--TRNA LIGASE, CYTOPLASMIC	N6-(Delta2-isopentenyl)-adenosine 5-diphosphate
Glyma.14G101500	M503T413_NEG	0.534802	0.0222103	ASPARTYL/LYSYL-TRNA SYNTHETASE // ASPARTATE--TRNA LIGASE, CYTOPLASMIC	Limonflavonyllactone B	Phenylpropanoids and polyketides	Flavonoids	O-methylated flavonoids
Glyma.14G101500	M511T438_POS	-0.548763	0.018355	ASPARTYL/LYSYL-TRNA SYNTHETASE // ASPARTATE--TRNA LIGASE, CYTOPLASMIC	6',7'-Dihydroxybergamottin decanal acetal	Phenylpropanoids and polyketides	Coumarins and derivatives	Furanocoumarins
Glyma.14G101500	M515T649_POS	-0.715936	0.00083339	ASPARTYL/LYSYL-TRNA SYNTHETASE // ASPARTATE--TRNA LIGASE, CYTOPLASMIC	2'',6''-O-Diacetyloninin	Phenylpropanoids and polyketides	Isoflavonoids	Isoflavonoid O-glycosides
Glyma.14G101500	M522T522_POS	0.573143	0.0129029	ASPARTYL/LYSYL-TRNA SYNTHETASE // ASPARTATE--TRNA LIGASE, CYTOPLASMIC	Petunidin 3-(6''-acetylglucoside)
Glyma.14G101500	M534T491_POS	-0.706834	0.00103875	ASPARTYL/LYSYL-TRNA SYNTHETASE // ASPARTATE--TRNA LIGASE, CYTOPLASMIC	CDP-abequose	Nucleosides, nucleotides, and analogues	Pyrimidine nucleotides	Pyrimidine nucleotide sugars
Glyma.14G101500	M537T634_POS	-0.518329	0.0275456	ASPARTYL/LYSYL-TRNA SYNTHETASE // ASPARTATE--TRNA LIGASE, CYTOPLASMIC	Lycopene	Lipids and lipid-like molecules	Prenol lipids	Tetraterpenoids
Glyma.14G101500	M567T517_2_POS	-0.5169	0.0280519	ASPARTYL/LYSYL-TRNA SYNTHETASE // ASPARTATE--TRNA LIGASE, CYTOPLASMIC	3-hydroxyechinenone	Lipids and lipid-like molecules	Prenol lipids	Tetraterpenoids
Glyma.14G101500	M575T466_POS	-0.61512	0.00658752	ASPARTYL/LYSYL-TRNA SYNTHETASE // ASPARTATE--TRNA LIGASE, CYTOPLASMIC	Stigmasterol-3-O-beta-D-glucopyranoside	Lipids and lipid-like molecules	Steroids and steroid derivatives	Stigmastanes and derivatives
Glyma.14G101500	M578T517_POS	-0.514268	0.0290027	ASPARTYL/LYSYL-TRNA SYNTHETASE // ASPARTATE--TRNA LIGASE, CYTOPLASMIC	C37-phenolphthiocerol A
Glyma.14G101500	M595T716_POS	-0.563123	0.0149609	ASPARTYL/LYSYL-TRNA SYNTHETASE // ASPARTATE--TRNA LIGASE, CYTOPLASMIC	Tiliroside	Phenylpropanoids and polyketides	Flavonoids	Flavonoid glycosides
Glyma.14G101500	M601T464_POS	-0.528763	0.0240628	ASPARTYL/LYSYL-TRNA SYNTHETASE // ASPARTATE--TRNA LIGASE, CYTOPLASMIC	Sativalanosteronyl glucoside	Lipids and lipid-like molecules	Prenol lipids	Triterpenoids
Glyma.14G101500	M609T413_POS	0.500474	0.0344011	ASPARTYL/LYSYL-TRNA SYNTHETASE // ASPARTATE--TRNA LIGASE, CYTOPLASMIC	Lanceolitol B5	Organic oxygen compounds	Organooxygen compounds	Carbohydrates and carbohydrate conjugates
Glyma.14G101500	M613T608_NEG	0.526446	0.0248048	ASPARTYL/LYSYL-TRNA SYNTHETASE // ASPARTATE--TRNA LIGASE, CYTOPLASMIC	Neomycin B	Organic oxygen compounds	Organooxygen compounds	Carbohydrates and carbohydrate conjugates
Glyma.14G101500	M663T682_POS	-0.604324	0.00789869	ASPARTYL/LYSYL-TRNA SYNTHETASE // ASPARTATE--TRNA LIGASE, CYTOPLASMIC	Prosapogenin	Lipids and lipid-like molecules	Prenol lipids	Terpene glycosides
Glyma.14G101500	M682T453_NEG	0.533094	0.0227227	ASPARTYL/LYSYL-TRNA SYNTHETASE // ASPARTATE--TRNA LIGASE, CYTOPLASMIC	27-O-Demethylrifamycin SV	Phenylpropanoids and polyketides	Macrolactams	NA
Glyma.14G101500	M711T556_NEG	0.510949	0.0302369	ASPARTYL/LYSYL-TRNA SYNTHETASE // ASPARTATE--TRNA LIGASE, CYTOPLASMIC	lipid X (E. coli)
Glyma.14G101500	M723T405_3_POS	0.525209	0.025208	ASPARTYL/LYSYL-TRNA SYNTHETASE // ASPARTATE--TRNA LIGASE, CYTOPLASMIC	trypanothione
Glyma.14G101500	M74T704_POS	-0.526838	0.024678	ASPARTYL/LYSYL-TRNA SYNTHETASE // ASPARTATE--TRNA LIGASE, CYTOPLASMIC	3-Aminopropanal	Organic oxygen compounds	Organooxygen compounds	Carbonyl compounds
Glyma.14G101500	M80T477_POS	-0.542841	0.01992	ASPARTYL/LYSYL-TRNA SYNTHETASE // ASPARTATE--TRNA LIGASE, CYTOPLASMIC	Pyridine	Organoheterocyclic compounds	Pyridines and derivatives	NA
Glyma.14G101500	M852T507_POS	-0.610634	0.00710905	ASPARTYL/LYSYL-TRNA SYNTHETASE // ASPARTATE--TRNA LIGASE, CYTOPLASMIC	3-demethylubiquinol-10
Glyma.14G101500	M883T701_NEG	0.647418	0.0036763	ASPARTYL/LYSYL-TRNA SYNTHETASE // ASPARTATE--TRNA LIGASE, CYTOPLASMIC	Pennogenin 3-O-beta-chacotrioside	Lipids and lipid-like molecules	Steroids and steroid derivatives	Steroidal glycosides
Glyma.14G101500	M915T695_NEG	0.536232	0.0217886	ASPARTYL/LYSYL-TRNA SYNTHETASE // ASPARTATE--TRNA LIGASE, CYTOPLASMIC	Abutiloside B	Lipids and lipid-like molecules	Steroids and steroid derivatives	Steroidal glycosides
Glyma.14G101500	M949T697_NEG	0.645448	0.00381652	ASPARTYL/LYSYL-TRNA SYNTHETASE // ASPARTATE--TRNA LIGASE, CYTOPLASMIC	Zn-Bacteriochlorophyll a
Glyma.14G101500	M974T533_3_POS	0.636613	0.00450028	ASPARTYL/LYSYL-TRNA SYNTHETASE // ASPARTATE--TRNA LIGASE, CYTOPLASMIC	Sinapoyl-CoA	Lipids and lipid-like molecules	Fatty Acyls	Fatty acyl thioesters
Glyma.16G083800	M101T95_NEG	-0.564028	0.0147649	ASPARTYL/LYSYL-TRNA SYNTHETASE // ASPARAGINE--TRNA LIGASE, CYTOPLASMIC 2	2-Ketobutyric acid	Organic acids and derivatives	Keto acids and derivatives	Short-chain keto acids and derivatives
Glyma.16G083800	M102T71_POS	0.554639	0.0168996	ASPARTYL/LYSYL-TRNA SYNTHETASE // ASPARAGINE--TRNA LIGASE, CYTOPLASMIC 2	1-Aminocyclopropane-1-carboxylate	Organic acids and derivatives	Carboxylic acids and derivatives	Amino acids, peptides, and analogues
Glyma.16G083800	M104T65_NEG	0.57741	0.0120983	ASPARTYL/LYSYL-TRNA SYNTHETASE // ASPARAGINE--TRNA LIGASE, CYTOPLASMIC 2	Serine	Organic acids and derivatives	Carboxylic acids and derivatives	Amino acids, peptides, and analogues
Glyma.16G083800	M106T70_POS	0.568308	0.0138658	ASPARTYL/LYSYL-TRNA SYNTHETASE // ASPARAGINE--TRNA LIGASE, CYTOPLASMIC 2	L-Serine	Organic acids and derivatives	Carboxylic acids and derivatives	Amino acids, peptides, and analogues
Glyma.16G083800	M115T75_NEG	-0.684752	0.00171715	ASPARTYL/LYSYL-TRNA SYNTHETASE // ASPARAGINE--TRNA LIGASE, CYTOPLASMIC 2	Maleic acid	Organic acids and derivatives	Carboxylic acids and derivatives	Dicarboxylic acids and derivatives
Glyma.16G083800	M118T66_NEG	0.569301	0.0136635	ASPARTYL/LYSYL-TRNA SYNTHETASE // ASPARAGINE--TRNA LIGASE, CYTOPLASMIC 2	L-Allothreonine	Organic acids and derivatives	Carboxylic acids and derivatives	Amino acids, peptides, and analogues
Glyma.16G083800	M118T73_POS	0.565727	0.0144025	ASPARTYL/LYSYL-TRNA SYNTHETASE // ASPARAGINE--TRNA LIGASE, CYTOPLASMIC 2	VALINE	Organic acids and derivatives	Carboxylic acids and derivatives	Amino acids, peptides, and analogues
Glyma.16G083800	M119T67_NEG	-0.503779	0.0330424	ASPARTYL/LYSYL-TRNA SYNTHETASE // ASPARAGINE--TRNA LIGASE, CYTOPLASMIC 2	3,4-Dihydroxybutanoic acid	Organic acids and derivatives	Hydroxy acids and derivatives	Beta hydroxy acids and derivatives
Glyma.16G083800	M120T69_POS	0.622615	0.00578558	ASPARTYL/LYSYL-TRNA SYNTHETASE // ASPARAGINE--TRNA LIGASE, CYTOPLASMIC 2	Threonine	Organic acids and derivatives	Carboxylic acids and derivatives	Amino acids, peptides, and analogues
Glyma.16G083800	M124T986_POS	0.509293	0.0308677	ASPARTYL/LYSYL-TRNA SYNTHETASE // ASPARAGINE--TRNA LIGASE, CYTOPLASMIC 2	Nicotinate	Organoheterocyclic compounds	Pyridines and derivatives	Pyridinecarboxylic acids and derivatives
Glyma.16G083800	M125T71_POS	0.610809	0.00708809	ASPARTYL/LYSYL-TRNA SYNTHETASE // ASPARAGINE--TRNA LIGASE, CYTOPLASMIC 2	Methylimidazole acetaldehyde	Organoheterocyclic compounds	Azoles	Imidazoles
Glyma.16G083800	M130T68_POS	0.657517	0.00302204	ASPARTYL/LYSYL-TRNA SYNTHETASE // ASPARAGINE--TRNA LIGASE, CYTOPLASMIC 2	5-Oxoproline	Organic acids and derivatives	Carboxylic acids and derivatives	Amino acids, peptides, and analogues
Glyma.16G083800	M132T98_2_POS	0.508442	0.0311962	ASPARTYL/LYSYL-TRNA SYNTHETASE // ASPARAGINE--TRNA LIGASE, CYTOPLASMIC 2	L-Isoleucine	Organic acids and derivatives	Carboxylic acids and derivatives	Amino acids, peptides, and analogues
Glyma.16G083800	M147T69_POS	0.642375	0.00404394	ASPARTYL/LYSYL-TRNA SYNTHETASE // ASPARAGINE--TRNA LIGASE, CYTOPLASMIC 2	L-Glutamine	Organic acids and derivatives	Carboxylic acids and derivatives	Amino acids, peptides, and analogues
Glyma.16G083800	M157T70_NEG	0.565523	0.0144456	ASPARTYL/LYSYL-TRNA SYNTHETASE // ASPARAGINE--TRNA LIGASE, CYTOPLASMIC 2	(R)(-)-Allantoin	Organoheterocyclic compounds	Azolidines	Imidazolidines
Glyma.16G083800	M158T107_NEG	0.684158	0.00173952	ASPARTYL/LYSYL-TRNA SYNTHETASE // ASPARAGINE--TRNA LIGASE, CYTOPLASMIC 2	5-Acetamidopentanoate	Lipids and lipid-like molecules	Fatty Acyls	Fatty acids and conjugates
Glyma.16G083800	M163T651_POS	0.530285	0.023585	ASPARTYL/LYSYL-TRNA SYNTHETASE // ASPARAGINE--TRNA LIGASE, CYTOPLASMIC 2	4-Hydroxycoumarin	Phenylpropanoids and polyketides	Coumarins and derivatives	Hydroxycoumarins
Glyma.16G083800	M185T66_POS	0.680835	0.00186916	ASPARTYL/LYSYL-TRNA SYNTHETASE // ASPARAGINE--TRNA LIGASE, CYTOPLASMIC 2	5-Hydroxyisourate	Organoheterocyclic compounds	Imidazopyrimidines	Purines and purine derivatives
Glyma.16G083800	M186T66_POS	0.613601	0.00676061	ASPARTYL/LYSYL-TRNA SYNTHETASE // ASPARAGINE--TRNA LIGASE, CYTOPLASMIC 2	2-Amino-3-carboxymuconate semialdehyde	Organic acids and derivatives	Carboxylic acids and derivatives	Amino acids, peptides, and analogues
Glyma.16G083800	M188T164_NEG	-0.509147	0.0309241	ASPARTYL/LYSYL-TRNA SYNTHETASE // ASPARAGINE--TRNA LIGASE, CYTOPLASMIC 2	N-Acetyl-L-glutamic acid	Organic acids and derivatives	Carboxylic acids and derivatives	Amino acids, peptides, and analogues
Glyma.16G083800	M203T107_NEG	0.553874	0.0170837	ASPARTYL/LYSYL-TRNA SYNTHETASE // ASPARAGINE--TRNA LIGASE, CYTOPLASMIC 2	D-Trp	Organoheterocyclic compounds	Indoles and derivatives	Indolyl carboxylic acids and derivatives
Glyma.16G083800	M205T107_POS	0.550555	0.017901	ASPARTYL/LYSYL-TRNA SYNTHETASE // ASPARAGINE--TRNA LIGASE, CYTOPLASMIC 2	2-Oxo-8-methylthiooctanoic acid	Organic acids and derivatives	Keto acids and derivatives	Medium-chain keto acids and derivatives
Glyma.16G083800	M215T194_POS	0.503069	0.033331	ASPARTYL/LYSYL-TRNA SYNTHETASE // ASPARAGINE--TRNA LIGASE, CYTOPLASMIC 2	Dethiobiotin	Lipids and lipid-like molecules	Fatty Acyls	Fatty acids and conjugates
Glyma.16G083800	M220T74_POS	-0.562297	0.0151414	ASPARTYL/LYSYL-TRNA SYNTHETASE // ASPARAGINE--TRNA LIGASE, CYTOPLASMIC 2	O-Succinyl-L-homoserine	Organic acids and derivatives	Carboxylic acids and derivatives	Amino acids, peptides, and analogues
Glyma.16G083800	M221T65_NEG	-0.533563	0.0225811	ASPARTYL/LYSYL-TRNA SYNTHETASE // ASPARAGINE--TRNA LIGASE, CYTOPLASMIC 2	Flavone	Phenylpropanoids and polyketides	Flavonoids	Flavones
Glyma.16G083800	M248T430_NEG	-0.523575	0.0257488	ASPARTYL/LYSYL-TRNA SYNTHETASE // ASPARAGINE--TRNA LIGASE, CYTOPLASMIC 2	linuron
Glyma.16G083800	M268T98_POS	-0.583999	0.010935	ASPARTYL/LYSYL-TRNA SYNTHETASE // ASPARAGINE--TRNA LIGASE, CYTOPLASMIC 2	Adenosine	Nucleosides, nucleotides, and analogues	Purine nucleosides	NA
Glyma.16G083800	M273T349_POS	0.507715	0.0314787	ASPARTYL/LYSYL-TRNA SYNTHETASE // ASPARAGINE--TRNA LIGASE, CYTOPLASMIC 2	Galaxolidone	Organoheterocyclic compounds	Benzopyrans	2-benzopyrans
Glyma.16G083800	M283T521_NEG	0.63319	0.00479064	ASPARTYL/LYSYL-TRNA SYNTHETASE // ASPARAGINE--TRNA LIGASE, CYTOPLASMIC 2	2-Phenylethyl beta-D-glucopyranoside	Organic oxygen compounds	Organooxygen compounds	Carbohydrates and carbohydrate conjugates
Glyma.16G083800	M303T888_POS	0.538474	0.02114	ASPARTYL/LYSYL-TRNA SYNTHETASE // ASPARAGINE--TRNA LIGASE, CYTOPLASMIC 2	(3R,4R)-3-(6-hydroxy-1,3-benzodioxol-5-yl)-3,4-dihydro-2H-chromene-4,7-diol
Glyma.16G083800	M321T538_POS	0.502051	0.0337477	ASPARTYL/LYSYL-TRNA SYNTHETASE // ASPARAGINE--TRNA LIGASE, CYTOPLASMIC 2	8-Acetyl-11beta,13-dihydrolactucin	Organoheterocyclic compounds	Lactones	Gamma butyrolactones
Glyma.16G083800	M325T65_NEG	0.522382	0.0261492	ASPARTYL/LYSYL-TRNA SYNTHETASE // ASPARAGINE--TRNA LIGASE, CYTOPLASMIC 2	Eugenol beta-D-glucopyranoside	Organic oxygen compounds	Organooxygen compounds	Carbohydrates and carbohydrate conjugates
Glyma.16G083800	M345T369_POS	0.576436	0.0122783	ASPARTYL/LYSYL-TRNA SYNTHETASE // ASPARAGINE--TRNA LIGASE, CYTOPLASMIC 2	5,6,7,4'-Tetramethoxyflavanone	Phenylpropanoids and polyketides	Flavonoids	O-methylated flavonoids
Glyma.16G083800	M399T68_POS	0.634092	0.00471265	ASPARTYL/LYSYL-TRNA SYNTHETASE // ASPARAGINE--TRNA LIGASE, CYTOPLASMIC 2	S-Adenosyl-L-methionine	Nucleosides, nucleotides, and analogues	5'-deoxyribonucleosides	5'-deoxy-5'-thionucleosides
Glyma.16G083800	M415T245_NEG	-0.508005	0.0313656	ASPARTYL/LYSYL-TRNA SYNTHETASE // ASPARAGINE--TRNA LIGASE, CYTOPLASMIC 2	Daidzin	Phenylpropanoids and polyketides	Isoflavonoids	Isoflavonoid O-glycosides
Glyma.16G083800	M423T73_POS	0.530677	0.023463	ASPARTYL/LYSYL-TRNA SYNTHETASE // ASPARAGINE--TRNA LIGASE, CYTOPLASMIC 2	Maltose 6'-phosphate	Organic oxygen compounds	Organooxygen compounds	Carbohydrates and carbohydrate conjugates
Glyma.16G083800	M433T374_POS	0.55777	0.0161622	ASPARTYL/LYSYL-TRNA SYNTHETASE // ASPARAGINE--TRNA LIGASE, CYTOPLASMIC 2	Apigenin-7-O-glucoside	Phenylpropanoids and polyketides	Flavonoids	Flavonoid glycosides
Glyma.16G083800	M435T268_POS	-0.661398	0.00279756	ASPARTYL/LYSYL-TRNA SYNTHETASE // ASPARAGINE--TRNA LIGASE, CYTOPLASMIC 2	Glutathionylspermidine	Organic acids and derivatives	Carboxylic acids and derivatives	Amino acids, peptides, and analogues
Glyma.16G083800	M471T243_NEG	0.508113	0.0313235	ASPARTYL/LYSYL-TRNA SYNTHETASE // ASPARAGINE--TRNA LIGASE, CYTOPLASMIC 2	Hassmarin	Phenylpropanoids and polyketides	Coumarins and derivatives	Pyranocoumarins
Glyma.16G083800	M481T503_NEG	-0.509738	0.0306973	ASPARTYL/LYSYL-TRNA SYNTHETASE // ASPARAGINE--TRNA LIGASE, CYTOPLASMIC 2	2'-Dehydrokanamycin A	Organic oxygen compounds	Organooxygen compounds	Carbohydrates and carbohydrate conjugates
Glyma.16G083800	M501T329_NEG	-0.528854	0.024034	ASPARTYL/LYSYL-TRNA SYNTHETASE // ASPARAGINE--TRNA LIGASE, CYTOPLASMIC 2	Cyclocalamin	Lipids and lipid-like molecules	Steroids and steroid derivatives	Steroid lactones
Glyma.16G083800	M613T608_NEG	0.501542	0.0339575	ASPARTYL/LYSYL-TRNA SYNTHETASE // ASPARAGINE--TRNA LIGASE, CYTOPLASMIC 2	Neomycin B	Organic oxygen compounds	Organooxygen compounds	Carbohydrates and carbohydrate conjugates
Glyma.16G083800	M615T485_POS	0.603076	0.00806297	ASPARTYL/LYSYL-TRNA SYNTHETASE // ASPARAGINE--TRNA LIGASE, CYTOPLASMIC 2	6'''-Deamino-6'''-oxoparomomycin II	Organic oxygen compounds	Organooxygen compounds	Carbohydrates and carbohydrate conjugates
Glyma.16G083800	M629T490_NEG	0.525295	0.0251799	ASPARTYL/LYSYL-TRNA SYNTHETASE // ASPARAGINE--TRNA LIGASE, CYTOPLASMIC 2	GDP-4-acetamido-4,6-dideoxy-alpha-D-mannose	Nucleosides, nucleotides, and analogues	Purine nucleotides	Purine nucleotide sugars
Glyma.16G083800	M640T413_POS	0.589359	0.0100562	ASPARTYL/LYSYL-TRNA SYNTHETASE // ASPARAGINE--TRNA LIGASE, CYTOPLASMIC 2	Demethyl-desacetyl-rifamycin S	Phenylpropanoids and polyketides	Macrolactams	NA
Glyma.16G083800	M677T590_NEG	-0.500347	0.0344542	ASPARTYL/LYSYL-TRNA SYNTHETASE // ASPARAGINE--TRNA LIGASE, CYTOPLASMIC 2	Arvenin III	Lipids and lipid-like molecules	Steroids and steroid derivatives	Steroidal glycosides
Glyma.16G083800	M86T98_POS	0.54288	0.0199094	ASPARTYL/LYSYL-TRNA SYNTHETASE // ASPARAGINE--TRNA LIGASE, CYTOPLASMIC 2	N-Methylpyrrolidine	Organoheterocyclic compounds	Pyrrolidines	N-alkylpyrrolidines
Glyma.16G083800	M88T67_NEG	0.641215	0.00413266	ASPARTYL/LYSYL-TRNA SYNTHETASE // ASPARAGINE--TRNA LIGASE, CYTOPLASMIC 2	L-Alanine	Organic acids and derivatives	Carboxylic acids and derivatives	Amino acids, peptides, and analogues
Glyma.16G083800	M90T68_POS	0.58977	0.00999123	ASPARTYL/LYSYL-TRNA SYNTHETASE // ASPARAGINE--TRNA LIGASE, CYTOPLASMIC 2	beta-Alanine	Organic acids and derivatives	Carboxylic acids and derivatives	Amino acids, peptides, and analogues
Glyma.16G083800	M99T75_POS	-0.609554	0.00723953	ASPARTYL/LYSYL-TRNA SYNTHETASE // ASPARAGINE--TRNA LIGASE, CYTOPLASMIC 2	Ortophosphate	Homogeneous non-metal compounds	Non-metal oxoanionic compounds	Non-metal phosphates
Glyma.16G091002	M116T69_POS	0.60202	0.00820408	Aspartate--tRNA ligase / Aspartyl-tRNA synthetase	L-Proline	Organic acids and derivatives	Carboxylic acids and derivatives	Amino acids, peptides, and analogues
Glyma.16G091002	M123T168_POS	0.642082	0.00406617	Aspartate--tRNA ligase / Aspartyl-tRNA synthetase	Benzoic acid	Benzenoids	Benzene and substituted derivatives	Benzoic acids and derivatives
Glyma.16G091002	M135T527_POS	0.545951	0.0190856	Aspartate--tRNA ligase / Aspartyl-tRNA synthetase	2,6-Dimethyl-1,3,5,7-octatetraenene	Hydrocarbons	Unsaturated hydrocarbons	Olefins
Glyma.16G091002	M135T68_NEG	0.635702	0.00457612	Aspartate--tRNA ligase / Aspartyl-tRNA synthetase	Threonic acid	Organic oxygen compounds	Organooxygen compounds	Carbohydrates and carbohydrate conjugates
Glyma.16G091002	M142T68_NEG	0.509673	0.0307223	Aspartate--tRNA ligase / Aspartyl-tRNA synthetase	N-Formylmaleamic acid	Lipids and lipid-like molecules	Fatty Acyls	Fatty amides
Glyma.16G091002	M146T71_POS	0.543678	0.0196925	Aspartate--tRNA ligase / Aspartyl-tRNA synthetase	4-[(Aminoiminomethyl)amino]butanoic acid	Organic acids and derivatives	Carboxylic acids and derivatives	Amino acids, peptides, and analogues
Glyma.16G091002	M148T929_NEG	0.516924	0.0280432	Aspartate--tRNA ligase / Aspartyl-tRNA synthetase	Benzyl isothiocyanate	Benzenoids	Benzene and substituted derivatives
Glyma.16G091002	M151T74_POS	0.673577	0.00218021	Aspartate--tRNA ligase / Aspartyl-tRNA synthetase	Bis(1-methylethyl) disulfide	Organosulfur compounds	Organic disulfides	Dialkyldisulfides
Glyma.16G091002	M158T68_NEG	0.50409	0.0329167	Aspartate--tRNA ligase / Aspartyl-tRNA synthetase	4-Methylene-L-glutamate	Organic acids and derivatives	Carboxylic acids and derivatives	Amino acids, peptides, and analogues
Glyma.16G091002	M171T390_NEG	-0.632795	0.0048251	Aspartate--tRNA ligase / Aspartyl-tRNA synthetase	1,4-Cyclohexanedicarboxylic acid	Organic acids and derivatives	Carboxylic acids and derivatives	Dicarboxylic acids and derivatives
Glyma.16G091002	M172T390_NEG	-0.610276	0.00715215	Aspartate--tRNA ligase / Aspartyl-tRNA synthetase	5-Guanidino-2-oxopentanoate	Organic acids and derivatives	Keto acids and derivatives	Short-chain keto acids and derivatives
Glyma.16G091002	M182T233_NEG	0.50444	0.0327756	Aspartate--tRNA ligase / Aspartyl-tRNA synthetase	Choline sulfate	Organic acids and derivatives	Organic sulfuric acids and derivatives	Sulfuric acid esters
Glyma.16G091002	M183T520_POS	-0.641001	0.00414912	Aspartate--tRNA ligase / Aspartyl-tRNA synthetase	Triethylphosphate	Organic acids and derivatives	Organic phosphoric acids and derivatives	Phosphate esters
Glyma.16G091002	M183T78_POS	0.5821	0.0112606	Aspartate--tRNA ligase / Aspartyl-tRNA synthetase	2-Oxo-4-phosphonobutanoate	Organic acids and derivatives	Keto acids and derivatives	Short-chain keto acids and derivatives
Glyma.16G091002	M189T697_POS	0.52072	0.026715	Aspartate--tRNA ligase / Aspartyl-tRNA synthetase	7,8-Diaminononanoate	Lipids and lipid-like molecules	Fatty Acyls	Fatty acids and conjugates
Glyma.16G091002	M192T142_POS	0.550995	0.0177908	Aspartate--tRNA ligase / Aspartyl-tRNA synthetase	5-Hydroxyindoleacetic acid; CE10; DUUGKQCEGZLZNO-UHFFFAOYSA-N	Organoheterocyclic compounds	Indoles and derivatives	Indolyl carboxylic acids and derivatives
Glyma.16G091002	M193T405_POS	0.528234	0.0242306	Aspartate--tRNA ligase / Aspartyl-tRNA synthetase	Myristicin	Organoheterocyclic compounds	Benzodioxoles
Glyma.16G091002	M193T430_POS	0.60432	0.00789919	Aspartate--tRNA ligase / Aspartyl-tRNA synthetase	Coumaryl acetate	Benzenoids	Benzene and substituted derivatives	Styrenes
Glyma.16G091002	M205T228_NEG	-0.697567	0.00128943	Aspartate--tRNA ligase / Aspartyl-tRNA synthetase	(2S,3R)-3-Hydroxybutane-1,2,3-tricarboxylate	Organic acids and derivatives	Carboxylic acids and derivatives	Tricarboxylic acids and derivatives
Glyma.16G091002	M209T109_POS	0.500891	0.0342274	Aspartate--tRNA ligase / Aspartyl-tRNA synthetase	Fraxetin	Phenylpropanoids and polyketides	Coumarins and derivatives	Hydroxycoumarins
Glyma.16G091002	M220T475_POS	0.506002	0.032152	Aspartate--tRNA ligase / Aspartyl-tRNA synthetase	(-)-Sedamine	Organic nitrogen compounds	Organonitrogen compounds	Amines
Glyma.16G091002	M225T480_POS	0.547212	0.018755	Aspartate--tRNA ligase / Aspartyl-tRNA synthetase	Sinapate	Phenylpropanoids and polyketides	Cinnamic acids and derivatives	Hydroxycinnamic acids and derivatives
Glyma.16G091002	M225T65_NEG	0.557858	0.0161419	Aspartate--tRNA ligase / Aspartyl-tRNA synthetase	Glucoheptonic acid	Organic oxygen compounds	Organooxygen compounds	Carbohydrates and carbohydrate conjugates
Glyma.16G091002	M226T66_NEG	0.589747	0.00999483	Aspartate--tRNA ligase / Aspartyl-tRNA synthetase	Arogenic acid	Organic acids and derivatives	Carboxylic acids and derivatives	Amino acids, peptides, and analogues
Glyma.16G091002	M232T70_NEG	-0.637259	0.00444712	Aspartate--tRNA ligase / Aspartyl-tRNA synthetase	2,3-Dihydro-3-hydroxy-3-methylthiazolo[3,2-a]indole-9-carboxaldehyde	Organoheterocyclic compounds	Indoles and derivatives	Indoles
Glyma.16G091002	M237T431_POS	0.619113	0.00614978	Aspartate--tRNA ligase / Aspartyl-tRNA synthetase	Capsidiol	Lipids and lipid-like molecules	Prenol lipids	Sesquiterpenoids
Glyma.16G091002	M238T70_POS	-0.703171	0.00113249	Aspartate--tRNA ligase / Aspartyl-tRNA synthetase	S-succinylcysteine	Organic acids and derivatives	Carboxylic acids and derivatives	Amino acids, peptides, and analogues
Glyma.16G091002	M247T236_POS	0.542736	0.0199487	Aspartate--tRNA ligase / Aspartyl-tRNA synthetase	Desacetoxymatricarin	Organoheterocyclic compounds	Lactones	Gamma butyrolactones
Glyma.16G091002	M251T378_NEG	0.522042	0.0262642	Aspartate--tRNA ligase / Aspartyl-tRNA synthetase	Deoxyinosine	Nucleosides, nucleotides, and analogues	Purine nucleosides	Purine 2'-deoxyribonucleosides
Glyma.16G091002	M259T63_NEG	-0.7059	0.001062	Aspartate--tRNA ligase / Aspartyl-tRNA synthetase	Galactose-1P	Organic oxygen compounds	Organooxygen compounds	Carbohydrates and carbohydrate conjugates
Glyma.16G091002	M264T421_NEG	0.595959	0.00905296	Aspartate--tRNA ligase / Aspartyl-tRNA synthetase	Thiamine	Organoheterocyclic compounds	Diazines	Pyrimidines and pyrimidine derivatives
Glyma.16G091002	M265T236_POS	0.55083	0.0178322	Aspartate--tRNA ligase / Aspartyl-tRNA synthetase	Abscisic acid	Lipids and lipid-like molecules	Prenol lipids	Sesquiterpenoids
Glyma.16G091002	M269T389_NEG	-0.733587	0.000530634	Aspartate--tRNA ligase / Aspartyl-tRNA synthetase	4',6,7-Trihydroxyisoflavone	Phenylpropanoids and polyketides	Isoflavonoids	Isoflav-2-enes
Glyma.16G091002	M279T433_NEG	0.530358	0.0235623	Aspartate--tRNA ligase / Aspartyl-tRNA synthetase	p-Coumaroyl-malic acid	Phenylpropanoids and polyketides	Cinnamic acids and derivatives	Hydroxycinnamic acids and derivatives
Glyma.16G091002	M287T471_NEG	0.583035	0.0110994	Aspartate--tRNA ligase / Aspartyl-tRNA synthetase	3-deoxy-D-arabino-heptulosonate 7-phosphate
Glyma.16G091002	M295T417_NEG	0.697203	0.00130024	Aspartate--tRNA ligase / Aspartyl-tRNA synthetase	Dehypoxanthine futalosine	Organic oxygen compounds	Organooxygen compounds	Carbonyl compounds
Glyma.16G091002	M300T916_POS	0.527075	0.0246015	Aspartate--tRNA ligase / Aspartyl-tRNA synthetase	D-erythro-sphingosine	Organic nitrogen compounds	Organonitrogen compounds	Amines
Glyma.16G091002	M301T457_NEG	0.53002	0.0236676	Aspartate--tRNA ligase / Aspartyl-tRNA synthetase	Quercetin	Phenylpropanoids and polyketides	Flavonoids	Flavones
Glyma.16G091002	M307T486_NEG	0.603218	0.00804407	Aspartate--tRNA ligase / Aspartyl-tRNA synthetase	dUMP
Glyma.16G091002	M308T420_NEG	0.587847	0.0102982	Aspartate--tRNA ligase / Aspartyl-tRNA synthetase	N-Acetylneuraminate	Organic oxygen compounds	Organooxygen compounds	Carbohydrates and carbohydrate conjugates
Glyma.16G091002	M308T421_POS	0.65501	0.00317474	Aspartate--tRNA ligase / Aspartyl-tRNA synthetase	Dihydroascorbigen	Organoheterocyclic compounds	Indoles and derivatives	Indoles
Glyma.16G091002	M319T463_POS	0.539882	0.0207405	Aspartate--tRNA ligase / Aspartyl-tRNA synthetase	3-deoxy-D-manno-octulosonate 8-phosphate
Glyma.16G091002	M322T702_NEG	-0.662725	0.00272399	Aspartate--tRNA ligase / Aspartyl-tRNA synthetase	(-)-Jasmonoyl-L-isoleucine	Organic acids and derivatives	Carboxylic acids and derivatives	Amino acids, peptides, and analogues
Glyma.16G091002	M335T265_NEG	0.535709	0.0219422	Aspartate--tRNA ligase / Aspartyl-tRNA synthetase	Nb-Feruloyltryptamine	Phenylpropanoids and polyketides	Cinnamic acids and derivatives	Hydroxycinnamic acids and derivatives
Glyma.16G091002	M335T325_POS	0.55842	0.0160123	Aspartate--tRNA ligase / Aspartyl-tRNA synthetase	N,N'-Diacetyllegionaminate	Organic oxygen compounds	Organooxygen compounds	Carbohydrates and carbohydrate conjugates
Glyma.16G091002	M339T419_POS	0.643009	0.00399611	Aspartate--tRNA ligase / Aspartyl-tRNA synthetase	1-Caffeoyl-4-deoxyquinic acid	Phenylpropanoids and polyketides	Cinnamic acids and derivatives	Hydroxycinnamic acids and derivatives
Glyma.16G091002	M346T144_POS	0.519275	0.0272146	Aspartate--tRNA ligase / Aspartyl-tRNA synthetase	p-Hydroxybenzyldesulphoglucosinolate	Organic oxygen compounds	Organooxygen compounds	Carbohydrates and carbohydrate conjugates
Glyma.16G091002	M353T649_1_POS	0.615768	0.00651486	Aspartate--tRNA ligase / Aspartyl-tRNA synthetase	Citrusinol	Phenylpropanoids and polyketides	Flavonoids	Pyranoflavonoids
Glyma.16G091002	M369T551_POS	0.533354	0.0226441	Aspartate--tRNA ligase / Aspartyl-tRNA synthetase	9-O-Methylglyceofuran	Phenylpropanoids and polyketides	Isoflavonoids	Furanoisoflavonoids
Glyma.16G091002	M371T648_POS	0.66723	0.00248615	Aspartate--tRNA ligase / Aspartyl-tRNA synthetase	4,4'-Bis(2-carboxyvinyl)-3,3'-dimethoxydiphenyl ether	Benzenoids	Benzene and substituted derivatives	Diphenylethers
Glyma.16G091002	M384T368_NEG	0.556846	0.0163772	Aspartate--tRNA ligase / Aspartyl-tRNA synthetase	Buntanmine A	Organoheterocyclic compounds	Quinolines and derivatives	Benzoquinolines
Glyma.16G091002	M384T434_POS	0.565118	0.0145315	Aspartate--tRNA ligase / Aspartyl-tRNA synthetase	Tolfenpyrad	Benzenoids	Benzene and substituted derivatives	Diphenylethers
Glyma.16G091002	M402T364_POS	0.627788	0.0052798	Aspartate--tRNA ligase / Aspartyl-tRNA synthetase	Moxifloxacin	Organoheterocyclic compounds	Quinolines and derivatives	Quinoline carboxylic acids
Glyma.16G091002	M427T236_POS	0.510216	0.0305148	Aspartate--tRNA ligase / Aspartyl-tRNA synthetase	Abscisic acid glucose ester	Lipids and lipid-like molecules	Prenol lipids	Sesquiterpenoids
Glyma.16G091002	M481T237_NEG	0.501214	0.0340935	Aspartate--tRNA ligase / Aspartyl-tRNA synthetase	dTTP
Glyma.16G091002	M483T354_POS	0.522823	0.0260007	Aspartate--tRNA ligase / Aspartyl-tRNA synthetase	N-[(7,8-Dihydropterin-6-yl)methyl]-4-(beta-D-ribofuranosyl)aniline 5'-phosphate	Organic oxygen compounds	Organooxygen compounds	Carbohydrates and carbohydrate conjugates
Glyma.16G091002	M511T438_POS	0.571334	0.0132567	Aspartate--tRNA ligase / Aspartyl-tRNA synthetase	6',7'-Dihydroxybergamottin decanal acetal	Phenylpropanoids and polyketides	Coumarins and derivatives	Furanocoumarins
Glyma.16G091002	M515T649_POS	0.522863	0.025987	Aspartate--tRNA ligase / Aspartyl-tRNA synthetase	2'',6''-O-Diacetyloninin	Phenylpropanoids and polyketides	Isoflavonoids	Isoflavonoid O-glycosides
Glyma.16G091002	M534T491_POS	0.542282	0.0200729	Aspartate--tRNA ligase / Aspartyl-tRNA synthetase	CDP-abequose	Nucleosides, nucleotides, and analogues	Pyrimidine nucleotides	Pyrimidine nucleotide sugars
Glyma.16G091002	M537T597_POS	0.643568	0.00395436	Aspartate--tRNA ligase / Aspartyl-tRNA synthetase	Lactucain B	Organoheterocyclic compounds	Lactones	Gamma butyrolactones
Glyma.16G091002	M542T237_NEG	0.64827	0.00361699	Aspartate--tRNA ligase / Aspartyl-tRNA synthetase	Doxorubicin	Phenylpropanoids and polyketides	Anthracyclines
Glyma.16G091002	M547T141_NEG	0.552723	0.0173637	Aspartate--tRNA ligase / Aspartyl-tRNA synthetase	Neobetanin	Organic oxygen compounds	Organooxygen compounds	Carbohydrates and carbohydrate conjugates
Glyma.16G091002	M555T487_NEG	0.513432	0.0293097	Aspartate--tRNA ligase / Aspartyl-tRNA synthetase	Khelmarin A	Phenylpropanoids and polyketides	Coumarins and derivatives	Pyranocoumarins
Glyma.16G091002	M611T637_POS	0.549603	0.018141	Aspartate--tRNA ligase / Aspartyl-tRNA synthetase	Divinylprotochlorophyllide
Glyma.16G091002	M613T608_NEG	-0.590653	0.00985273	Aspartate--tRNA ligase / Aspartyl-tRNA synthetase	Neomycin B	Organic oxygen compounds	Organooxygen compounds	Carbohydrates and carbohydrate conjugates
Glyma.16G091002	M639T410_NEG	0.597889	0.00877531	Aspartate--tRNA ligase / Aspartyl-tRNA synthetase	Isorhamnetin 3-gentiobioside	Phenylpropanoids and polyketides	Flavonoids	Flavonoid glycosides
Glyma.16G091002	M767T702_POS	0.527987	0.0243094	Aspartate--tRNA ligase / Aspartyl-tRNA synthetase	Soyasaponin IV	Lipids and lipid-like molecules	Prenol lipids	Terpene glycosides
Glyma.16G091002	M835T669_NEG	0.50166	0.0339088	Aspartate--tRNA ligase / Aspartyl-tRNA synthetase	P1,P4-bis(5-adenosyl) tetraphosphate
Glyma.16G091002	M852T507_POS	0.512132	0.0297924	Aspartate--tRNA ligase / Aspartyl-tRNA synthetase	3-demethylubiquinol-10
Glyma.16G091002	M883T701_NEG	-0.579054	0.0117993	Aspartate--tRNA ligase / Aspartyl-tRNA synthetase	Pennogenin 3-O-beta-chacotrioside	Lipids and lipid-like molecules	Steroids and steroid derivatives	Steroidal glycosides
Glyma.17G142000	M110T938_POS	-0.548213	0.0184959	ASPARAGINE--TRNA LIGASE, MITOCHONDRIAL	(S)-2-chloropropanoate
Glyma.17G142000	M138T295_POS	-0.532223	0.0229873	ASPARAGINE--TRNA LIGASE, MITOCHONDRIAL	4-Aminobenzoate	Benzenoids	Benzene and substituted derivatives	Benzoic acids and derivatives
Glyma.17G142000	M151T762_POS	-0.580653	0.011514	ASPARAGINE--TRNA LIGASE, MITOCHONDRIAL	Thymol	Lipids and lipid-like molecules	Prenol lipids	Monoterpenoids
Glyma.17G142000	M157T938_POS	-0.663281	0.00269368	ASPARAGINE--TRNA LIGASE, MITOCHONDRIAL	2-Phosphoglycolate	Organic acids and derivatives	Organic phosphoric acids and derivatives	Phosphate esters
Glyma.17G142000	M169T761_POS	-0.649256	0.0035493	ASPARAGINE--TRNA LIGASE, MITOCHONDRIAL	6-Hydroxy-2,6-dimethyl-2,7-octadien-4-one	Lipids and lipid-like molecules	Prenol lipids	Monoterpenoids
Glyma.17G142000	M180T615_POS	0.503434	0.0331825	ASPARAGINE--TRNA LIGASE, MITOCHONDRIAL	L-Homophenylalanine	Organic acids and derivatives	Carboxylic acids and derivatives	Amino acids, peptides, and analogues
Glyma.17G142000	M187T69_POS	-0.524315	0.0255029	ASPARAGINE--TRNA LIGASE, MITOCHONDRIAL	3-maleylpyruvate
Glyma.17G142000	M190T618_POS	0.505307	0.0324285	ASPARAGINE--TRNA LIGASE, MITOCHONDRIAL	8-Methylthiooctanaldoxime	Organic nitrogen compounds	Organonitrogen compounds	Oximes
Glyma.17G142000	M191T595_POS	-0.672696	0.00222074	ASPARAGINE--TRNA LIGASE, MITOCHONDRIAL	beta-Damascenone	Organic oxygen compounds	Organooxygen compounds	Carbonyl compounds
Glyma.17G142000	M193T806_POS	-0.585405	0.0106987	ASPARAGINE--TRNA LIGASE, MITOCHONDRIAL	Vitispirane	Organoheterocyclic compounds	Tetrahydrofurans
Glyma.17G142000	M199T446_POS	-0.568858	0.0137534	ASPARAGINE--TRNA LIGASE, MITOCHONDRIAL	Hercynine	Organic acids and derivatives	Carboxylic acids and derivatives	Amino acids, peptides, and analogues
Glyma.17G142000	M201T74_POS	-0.553492	0.0171762	ASPARAGINE--TRNA LIGASE, MITOCHONDRIAL	D-erythrose 4-phosphate
Glyma.17G142000	M205T928_NEG	0.519512	0.0271321	ASPARAGINE--TRNA LIGASE, MITOCHONDRIAL	3-Oxalomalate	Organic acids and derivatives	Carboxylic acids and derivatives	Tricarboxylic acids and derivatives
Glyma.17G142000	M209T604_POS	-0.675934	0.00207484	ASPARAGINE--TRNA LIGASE, MITOCHONDRIAL	alpha-Asarone	Benzenoids	Phenol ethers	Anisoles
Glyma.17G142000	M215T194_POS	-0.545308	0.0192558	ASPARAGINE--TRNA LIGASE, MITOCHONDRIAL	Dethiobiotin	Lipids and lipid-like molecules	Fatty Acyls	Fatty acids and conjugates
Glyma.17G142000	M252T98_POS	-0.618016	0.00626765	ASPARAGINE--TRNA LIGASE, MITOCHONDRIAL	Deoxyadenosine	Nucleosides, nucleotides, and analogues	Purine nucleosides	Purine 2'-deoxyribonucleosides
Glyma.17G142000	M256T599_POS	-0.504115	0.0329068	ASPARAGINE--TRNA LIGASE, MITOCHONDRIAL	L-Pyrrolysine	Organic acids and derivatives	Carboxylic acids and derivatives	Amino acids, peptides, and analogues
Glyma.17G142000	M265T285_POS	0.52858	0.0241207	ASPARAGINE--TRNA LIGASE, MITOCHONDRIAL	Feruloylputrescine	Phenylpropanoids and polyketides	Cinnamic acids and derivatives	Hydroxycinnamic acids and derivatives
Glyma.17G142000	M277T796_POS	-0.591058	0.00978988	ASPARAGINE--TRNA LIGASE, MITOCHONDRIAL	Dehydrocrepenynic acid	Lipids and lipid-like molecules	Fatty Acyls	Fatty acids and conjugates
Glyma.17G142000	M279T781_POS	-0.602185	0.00818181	ASPARAGINE--TRNA LIGASE, MITOCHONDRIAL	?-linolenic acid	Lipids and lipid-like molecules	Fatty Acyls	Lineolic acids and derivatives
Glyma.17G142000	M291T743_POS	-0.66863	0.0024158	ASPARAGINE--TRNA LIGASE, MITOCHONDRIAL	Deoxy phytoprostane J1	Lipids and lipid-like molecules	Fatty Acyls	Eicosanoids
Glyma.17G142000	M295T796_POS	-0.584075	0.0109221	ASPARAGINE--TRNA LIGASE, MITOCHONDRIAL	Colneleic acid	Lipids and lipid-like molecules	Fatty Acyls	Fatty acids and conjugates
Glyma.17G142000	M303T499_3_POS	0.574247	0.0126909	ASPARAGINE--TRNA LIGASE, MITOCHONDRIAL	Abietic acid	Lipids and lipid-like molecules	Prenol lipids	Diterpenoids
Glyma.17G142000	M305T814_POS	-0.710254	0.000957133	ASPARAGINE--TRNA LIGASE, MITOCHONDRIAL	3-Acetoxy-9-heptadecene-4,6-diyn-8-ol.	Lipids and lipid-like molecules	Fatty Acyls	Fatty alcohol esters
Glyma.17G142000	M313T734_NEG	-0.636323	0.00452431	ASPARAGINE--TRNA LIGASE, MITOCHONDRIAL	12,13-DHOME	Lipids and lipid-like molecules	Fatty Acyls	Fatty acids and conjugates
Glyma.17G142000	M319T495_2_POS	-0.584567	0.010839	ASPARAGINE--TRNA LIGASE, MITOCHONDRIAL	myricetin
Glyma.17G142000	M321T870_POS	-0.694103	0.00139521	ASPARAGINE--TRNA LIGASE, MITOCHONDRIAL	Anomallotusin
Glyma.17G142000	M329T783_POS	-0.588082	0.0102602	ASPARAGINE--TRNA LIGASE, MITOCHONDRIAL	(4Z,7Z,10Z,13Z,16Z,19Z)-Docosahexaenoic acid	Lipids and lipid-like molecules	Fatty Acyls	Fatty acids and conjugates
Glyma.17G142000	M331T724_POS	-0.589562	0.0100241	ASPARAGINE--TRNA LIGASE, MITOCHONDRIAL	(7Z,10Z,13Z,16Z,19Z)-Docosapentaenoic acid	Lipids and lipid-like molecules	Fatty Acyls	Fatty acids and conjugates
Glyma.17G142000	M338T700_POS	-0.603479	0.0080096	ASPARAGINE--TRNA LIGASE, MITOCHONDRIAL	5-Hydroxymethyldeoxycytidylate	Nucleosides, nucleotides, and analogues	Pyrimidine nucleotides	Pyrimidine deoxyribonucleotides
Glyma.17G142000	M345T861_POS	-0.575844	0.012389	ASPARAGINE--TRNA LIGASE, MITOCHONDRIAL	SB 205607	Organoheterocyclic compounds	Quinolines and derivatives	Phenylquinolines
Glyma.17G142000	M346T860_POS	-0.572711	0.0129868	ASPARAGINE--TRNA LIGASE, MITOCHONDRIAL	cyclic pyranopterin phosphate
Glyma.17G142000	M347T786_POS	-0.779438	0.000137191	ASPARAGINE--TRNA LIGASE, MITOCHONDRIAL	Corticosterone	Lipids and lipid-like molecules	Steroids and steroid derivatives	Hydroxysteroids
Glyma.17G142000	M350T742_POS	-0.608025	0.00742748	ASPARAGINE--TRNA LIGASE, MITOCHONDRIAL	1-(2-carboxyphenylamino)-1-deoxy-D-ribulose 5-phosphate
Glyma.17G142000	M352T442_POS	-0.529214	0.0239206	ASPARAGINE--TRNA LIGASE, MITOCHONDRIAL	Rhizocticin A	Organic acids and derivatives	Carboxylic acids and derivatives	Amino acids, peptides, and analogues
Glyma.17G142000	M363T654_POS	-0.504447	0.0327731	ASPARAGINE--TRNA LIGASE, MITOCHONDRIAL	10beta,14beta-Dihydroxytaxa-4(20),11-dien-5alpha-yl acetate	Lipids and lipid-like molecules	Prenol lipids	Diterpenoids
Glyma.17G142000	M363T922_NEG	-0.648781	0.00358175	ASPARAGINE--TRNA LIGASE, MITOCHONDRIAL	XMP
Glyma.17G142000	M391T699_NEG	-0.62963	0.00510866	ASPARAGINE--TRNA LIGASE, MITOCHONDRIAL	5-O-Demethylnobiletin
Glyma.17G142000	M413T465_2_POS	0.502517	0.0335562	ASPARAGINE--TRNA LIGASE, MITOCHONDRIAL	Valenciachrome	Lipids and lipid-like molecules	Prenol lipids	Diterpenoids
Glyma.17G142000	M427T460_POS	-0.501153	0.0341188	ASPARAGINE--TRNA LIGASE, MITOCHONDRIAL	dZDP
Glyma.17G142000	M456T345_NEG	0.505096	0.0325126	ASPARAGINE--TRNA LIGASE, MITOCHONDRIAL	Amygdalin	Organic oxygen compounds	Organooxygen compounds	Carbohydrates and carbohydrate conjugates
Glyma.17G142000	M457T870_POS	-0.525677	0.0250548	ASPARAGINE--TRNA LIGASE, MITOCHONDRIAL	Oleanolic acid	Lipids and lipid-like molecules	Prenol lipids	Triterpenoids
Glyma.17G142000	M472T499_POS	0.550118	0.0180109	ASPARAGINE--TRNA LIGASE, MITOCHONDRIAL	Terfenadine	Benzenoids	Benzene and substituted derivatives	Diphenylmethanes
Glyma.17G142000	M567T517_2_POS	0.518908	0.0273428	ASPARAGINE--TRNA LIGASE, MITOCHONDRIAL	3-hydroxyechinenone	Lipids and lipid-like molecules	Prenol lipids	Tetraterpenoids
Glyma.17G142000	M578T517_POS	0.54567	0.0191599	ASPARAGINE--TRNA LIGASE, MITOCHONDRIAL	C37-phenolphthiocerol A
Glyma.17G142000	M663T682_POS	0.539028	0.0209819	ASPARAGINE--TRNA LIGASE, MITOCHONDRIAL	Prosapogenin	Lipids and lipid-like molecules	Prenol lipids	Terpene glycosides
Glyma.17G142000	M894T716_POS	0.528936	0.0240082	ASPARAGINE--TRNA LIGASE, MITOCHONDRIAL	chlorophyll a
Glyma.17G142000	M913T695_NEG	-0.584601	0.0108333	ASPARAGINE--TRNA LIGASE, MITOCHONDRIAL	Abutiloside H	Lipids and lipid-like molecules	Steroids and steroid derivatives	Steroidal glycosides
Glyma.17G142000	M915T695_NEG	-0.560679	0.0155002	ASPARAGINE--TRNA LIGASE, MITOCHONDRIAL	Abutiloside B	Lipids and lipid-like molecules	Steroids and steroid derivatives	Steroidal glycosides
Glyma.17G142000	M974T533_3_POS	-0.569321	0.0136595	ASPARAGINE--TRNA LIGASE, MITOCHONDRIAL	Sinapoyl-CoA	Lipids and lipid-like molecules	Fatty Acyls	Fatty acyl thioesters
Glyma.17G223600	M101T73_POS	-0.537874	0.021312	ASPARTYL/LYSYL-TRNA SYNTHETASE // ASPARTATE--TRNA LIGASE, CYTOPLASMIC	Tiglic acid	Lipids and lipid-like molecules	Fatty Acyls	Fatty acids and conjugates
Glyma.17G223600	M106T70_POS	0.593532	0.00941206	ASPARTYL/LYSYL-TRNA SYNTHETASE // ASPARTATE--TRNA LIGASE, CYTOPLASMIC	L-Serine	Organic acids and derivatives	Carboxylic acids and derivatives	Amino acids, peptides, and analogues
Glyma.17G223600	M107T151_NEG	-0.504497	0.0327527	ASPARTYL/LYSYL-TRNA SYNTHETASE // ASPARTATE--TRNA LIGASE, CYTOPLASMIC	Benzenemethanol	Benzenoids	Benzene and substituted derivatives	Benzyl alcohols
Glyma.17G223600	M114T73_POS	-0.512454	0.0296723	ASPARTYL/LYSYL-TRNA SYNTHETASE // ASPARTATE--TRNA LIGASE, CYTOPLASMIC	(S)-1-Pyrroline-5-carboxylate	Organic acids and derivatives	Carboxylic acids and derivatives	Amino acids, peptides, and analogues
Glyma.17G223600	M115T75_NEG	-0.741285	0.000431076	ASPARTYL/LYSYL-TRNA SYNTHETASE // ASPARTATE--TRNA LIGASE, CYTOPLASMIC	Maleic acid	Organic acids and derivatives	Carboxylic acids and derivatives	Dicarboxylic acids and derivatives
Glyma.17G223600	M119T67_NEG	-0.581171	0.0114229	ASPARTYL/LYSYL-TRNA SYNTHETASE // ASPARTATE--TRNA LIGASE, CYTOPLASMIC	3,4-Dihydroxybutanoic acid	Organic acids and derivatives	Hydroxy acids and derivatives	Beta hydroxy acids and derivatives
Glyma.17G223600	M120T69_POS	0.533943	0.0224668	ASPARTYL/LYSYL-TRNA SYNTHETASE // ASPARTATE--TRNA LIGASE, CYTOPLASMIC	Threonine	Organic acids and derivatives	Carboxylic acids and derivatives	Amino acids, peptides, and analogues
Glyma.17G223600	M123T168_POS	-0.587479	0.0103577	ASPARTYL/LYSYL-TRNA SYNTHETASE // ASPARTATE--TRNA LIGASE, CYTOPLASMIC	Benzoic acid	Benzenoids	Benzene and substituted derivatives	Benzoic acids and derivatives
Glyma.17G223600	M129T909_POS	-0.53757	0.0213997	ASPARTYL/LYSYL-TRNA SYNTHETASE // ASPARTATE--TRNA LIGASE, CYTOPLASMIC	3-Octanone	Organic oxygen compounds	Organooxygen compounds	Carbonyl compounds
Glyma.17G223600	M130T68_POS	0.527263	0.0245411	ASPARTYL/LYSYL-TRNA SYNTHETASE // ASPARTATE--TRNA LIGASE, CYTOPLASMIC	5-Oxoproline	Organic acids and derivatives	Carboxylic acids and derivatives	Amino acids, peptides, and analogues
Glyma.17G223600	M135T257_POS	-0.516506	0.0281924	ASPARTYL/LYSYL-TRNA SYNTHETASE // ASPARTATE--TRNA LIGASE, CYTOPLASMIC	FEMA 3677	Organic acids and derivatives	Carboxylic acids and derivatives	Carboxylic acid derivatives
Glyma.17G223600	M135T258_NEG	-0.543562	0.019724	ASPARTYL/LYSYL-TRNA SYNTHETASE // ASPARTATE--TRNA LIGASE, CYTOPLASMIC	p-Hydroxyacetophenone	Organic oxygen compounds	Organooxygen compounds	Carbonyl compounds
Glyma.17G223600	M135T69_POS	0.505795	0.0322342	ASPARTYL/LYSYL-TRNA SYNTHETASE // ASPARTATE--TRNA LIGASE, CYTOPLASMIC	(R)-2,3-Dihydroxy-3-methylbutanoate	Lipids and lipid-like molecules	Fatty Acyls	Fatty acids and conjugates
Glyma.17G223600	M147T69_POS	0.619288	0.00613119	ASPARTYL/LYSYL-TRNA SYNTHETASE // ASPARTATE--TRNA LIGASE, CYTOPLASMIC	L-Glutamine	Organic acids and derivatives	Carboxylic acids and derivatives	Amino acids, peptides, and analogues
Glyma.17G223600	M148T929_NEG	-0.595351	0.00914183	ASPARTYL/LYSYL-TRNA SYNTHETASE // ASPARTATE--TRNA LIGASE, CYTOPLASMIC	Benzyl isothiocyanate	Benzenoids	Benzene and substituted derivatives
Glyma.17G223600	M149T71_2_NEG	-0.5557	0.0166467	ASPARTYL/LYSYL-TRNA SYNTHETASE // ASPARTATE--TRNA LIGASE, CYTOPLASMIC	Lyxose	Organic oxygen compounds	Organooxygen compounds	Carbohydrates and carbohydrate conjugates
Glyma.17G223600	M150T71_NEG	-0.548673	0.0183781	ASPARTYL/LYSYL-TRNA SYNTHETASE // ASPARTATE--TRNA LIGASE, CYTOPLASMIC	Guanine	Organoheterocyclic compounds	Imidazopyrimidines	Purines and purine derivatives
Glyma.17G223600	M151T71_NEG	-0.566539	0.014232	ASPARTYL/LYSYL-TRNA SYNTHETASE // ASPARTATE--TRNA LIGASE, CYTOPLASMIC	N1-Methyl-2-pyridone-5-carboxamide	Organoheterocyclic compounds	Pyridines and derivatives	Pyridinecarboxylic acids and derivatives
Glyma.17G223600	M157T70_NEG	0.511105	0.0301781	ASPARTYL/LYSYL-TRNA SYNTHETASE // ASPARTATE--TRNA LIGASE, CYTOPLASMIC	(R)(-)-Allantoin	Organoheterocyclic compounds	Azolidines	Imidazolidines
Glyma.17G223600	M158T107_NEG	0.615254	0.0065725	ASPARTYL/LYSYL-TRNA SYNTHETASE // ASPARTATE--TRNA LIGASE, CYTOPLASMIC	5-Acetamidopentanoate	Lipids and lipid-like molecules	Fatty Acyls	Fatty acids and conjugates
Glyma.17G223600	M181T233_NEG	-0.508259	0.0312668	ASPARTYL/LYSYL-TRNA SYNTHETASE // ASPARTATE--TRNA LIGASE, CYTOPLASMIC	4-Hydroxyphenyllactic acid	Phenylpropanoids and polyketides	Phenylpropanoic acids	NA
Glyma.17G223600	M181T257_POS	-0.558238	0.0160543	ASPARTYL/LYSYL-TRNA SYNTHETASE // ASPARTATE--TRNA LIGASE, CYTOPLASMIC	4-hydroxyphenyl pyruvate	Benzenoids	Benzene and substituted derivatives	Phenylpyruvic acid derivatives
Glyma.17G223600	M182T233_NEG	-0.531836	0.0231056	ASPARTYL/LYSYL-TRNA SYNTHETASE // ASPARTATE--TRNA LIGASE, CYTOPLASMIC	Choline sulfate	Organic acids and derivatives	Organic sulfuric acids and derivatives	Sulfuric acid esters
Glyma.17G223600	M183T520_POS	0.557002	0.0163407	ASPARTYL/LYSYL-TRNA SYNTHETASE // ASPARTATE--TRNA LIGASE, CYTOPLASMIC	Triethylphosphate	Organic acids and derivatives	Organic phosphoric acids and derivatives	Phosphate esters
Glyma.17G223600	M183T78_POS	-0.5061	0.0321131	ASPARTYL/LYSYL-TRNA SYNTHETASE // ASPARTATE--TRNA LIGASE, CYTOPLASMIC	2-Oxo-4-phosphonobutanoate	Organic acids and derivatives	Keto acids and derivatives	Short-chain keto acids and derivatives
Glyma.17G223600	M185T66_POS	0.661212	0.002808	ASPARTYL/LYSYL-TRNA SYNTHETASE // ASPARTATE--TRNA LIGASE, CYTOPLASMIC	5-Hydroxyisourate	Organoheterocyclic compounds	Imidazopyrimidines	Purines and purine derivatives
Glyma.17G223600	M186T66_POS	0.525283	0.0251837	ASPARTYL/LYSYL-TRNA SYNTHETASE // ASPARTATE--TRNA LIGASE, CYTOPLASMIC	2-Amino-3-carboxymuconate semialdehyde	Organic acids and derivatives	Carboxylic acids and derivatives	Amino acids, peptides, and analogues
Glyma.17G223600	M187T69_POS	0.570235	0.0134755	ASPARTYL/LYSYL-TRNA SYNTHETASE // ASPARTATE--TRNA LIGASE, CYTOPLASMIC	3-maleylpyruvate
Glyma.17G223600	M193T430_POS	-0.555496	0.0166952	ASPARTYL/LYSYL-TRNA SYNTHETASE // ASPARTATE--TRNA LIGASE, CYTOPLASMIC	Coumaryl acetate	Benzenoids	Benzene and substituted derivatives	Styrenes
Glyma.17G223600	M199T909_POS	-0.53086	0.0234065	ASPARTYL/LYSYL-TRNA SYNTHETASE // ASPARTATE--TRNA LIGASE, CYTOPLASMIC	Citronellyl acetate	Lipids and lipid-like molecules	Fatty Acyls	Fatty alcohol esters
Glyma.17G223600	M201T74_POS	0.672282	0.00223998	ASPARTYL/LYSYL-TRNA SYNTHETASE // ASPARTATE--TRNA LIGASE, CYTOPLASMIC	D-erythrose 4-phosphate
Glyma.17G223600	M205T228_NEG	0.671114	0.00229502	ASPARTYL/LYSYL-TRNA SYNTHETASE // ASPARTATE--TRNA LIGASE, CYTOPLASMIC	(2S,3R)-3-Hydroxybutane-1,2,3-tricarboxylate	Organic acids and derivatives	Carboxylic acids and derivatives	Tricarboxylic acids and derivatives
Glyma.17G223600	M209T109_POS	-0.564915	0.0145748	ASPARTYL/LYSYL-TRNA SYNTHETASE // ASPARTATE--TRNA LIGASE, CYTOPLASMIC	Fraxetin	Phenylpropanoids and polyketides	Coumarins and derivatives	Hydroxycoumarins
Glyma.17G223600	M215T194_POS	0.592559	0.00955917	ASPARTYL/LYSYL-TRNA SYNTHETASE // ASPARTATE--TRNA LIGASE, CYTOPLASMIC	Dethiobiotin	Lipids and lipid-like molecules	Fatty Acyls	Fatty acids and conjugates
Glyma.17G223600	M220T74_POS	-0.519365	0.0271833	ASPARTYL/LYSYL-TRNA SYNTHETASE // ASPARTATE--TRNA LIGASE, CYTOPLASMIC	O-Succinyl-L-homoserine	Organic acids and derivatives	Carboxylic acids and derivatives	Amino acids, peptides, and analogues
Glyma.17G223600	M225T351_POS	-0.557354	0.0162586	ASPARTYL/LYSYL-TRNA SYNTHETASE // ASPARTATE--TRNA LIGASE, CYTOPLASMIC	Methyl jasmonate	Lipids and lipid-like molecules	Fatty Acyls	Lineolic acids and derivatives
Glyma.17G223600	M237T724_POS	0.526073	0.024926	ASPARTYL/LYSYL-TRNA SYNTHETASE // ASPARTATE--TRNA LIGASE, CYTOPLASMIC	Aubergenone	Lipids and lipid-like molecules	Prenol lipids	Sesquiterpenoids
Glyma.17G223600	M238T70_POS	0.615059	0.00659443	ASPARTYL/LYSYL-TRNA SYNTHETASE // ASPARTATE--TRNA LIGASE, CYTOPLASMIC	S-succinylcysteine	Organic acids and derivatives	Carboxylic acids and derivatives	Amino acids, peptides, and analogues
Glyma.17G223600	M243T798_NEG	0.508761	0.0310728	ASPARTYL/LYSYL-TRNA SYNTHETASE // ASPARTATE--TRNA LIGASE, CYTOPLASMIC	beta-Hydroxymyristic acid	Lipids and lipid-like molecules	Fatty Acyls	Fatty acids and conjugates
Glyma.17G223600	M247T796_NEG	-0.632759	0.00482824	ASPARTYL/LYSYL-TRNA SYNTHETASE // ASPARTATE--TRNA LIGASE, CYTOPLASMIC	pyridoxamine 5-phosphate
Glyma.17G223600	M249T727_NEG	0.685114	0.00170365	ASPARTYL/LYSYL-TRNA SYNTHETASE // ASPARTATE--TRNA LIGASE, CYTOPLASMIC	Viscic acid	Lipids and lipid-like molecules	Prenol lipids	Sesquiterpenoids
Glyma.17G223600	M264T421_NEG	-0.51163	0.0299804	ASPARTYL/LYSYL-TRNA SYNTHETASE // ASPARTATE--TRNA LIGASE, CYTOPLASMIC	Thiamine	Organoheterocyclic compounds	Diazines	Pyrimidines and pyrimidine derivatives
Glyma.17G223600	M267T518_POS	-0.534945	0.0221679	ASPARTYL/LYSYL-TRNA SYNTHETASE // ASPARTATE--TRNA LIGASE, CYTOPLASMIC	3,14-Dihydroxy-11,13-dihydrocostunolide	Lipids and lipid-like molecules	Prenol lipids	Terpene lactones
Glyma.17G223600	M269T389_NEG	0.630883	0.00499484	ASPARTYL/LYSYL-TRNA SYNTHETASE // ASPARTATE--TRNA LIGASE, CYTOPLASMIC	4',6,7-Trihydroxyisoflavone	Phenylpropanoids and polyketides	Isoflavonoids	Isoflav-2-enes
Glyma.17G223600	M273T388_POS	-0.548492	0.0184244	ASPARTYL/LYSYL-TRNA SYNTHETASE // ASPARTATE--TRNA LIGASE, CYTOPLASMIC	Deoxyshikonin	Benzenoids	Naphthalenes	Naphthoquinones
Glyma.17G223600	M275T704_2_POS	-0.554209	0.0170029	ASPARTYL/LYSYL-TRNA SYNTHETASE // ASPARTATE--TRNA LIGASE, CYTOPLASMIC	apiforol
Glyma.17G223600	M277T74_POS	-0.661025	0.0028185	ASPARTYL/LYSYL-TRNA SYNTHETASE // ASPARTATE--TRNA LIGASE, CYTOPLASMIC	6-Phosphogluconic acid	Organic oxygen compounds	Organooxygen compounds	Carbohydrates and carbohydrate conjugates
Glyma.17G223600	M279T781_POS	0.520386	0.0268298	ASPARTYL/LYSYL-TRNA SYNTHETASE // ASPARTATE--TRNA LIGASE, CYTOPLASMIC	?-linolenic acid	Lipids and lipid-like molecules	Fatty Acyls	Lineolic acids and derivatives
Glyma.17G223600	M283T521_NEG	0.511143	0.0301637	ASPARTYL/LYSYL-TRNA SYNTHETASE // ASPARTATE--TRNA LIGASE, CYTOPLASMIC	2-Phenylethyl beta-D-glucopyranoside	Organic oxygen compounds	Organooxygen compounds	Carbohydrates and carbohydrate conjugates
Glyma.17G223600	M302T727_POS	-0.506958	0.0317748	ASPARTYL/LYSYL-TRNA SYNTHETASE // ASPARTATE--TRNA LIGASE, CYTOPLASMIC	Sphinganine	Organic nitrogen compounds	Organonitrogen compounds	Amines
Glyma.17G223600	M303T499_3_POS	-0.566704	0.0141975	ASPARTYL/LYSYL-TRNA SYNTHETASE // ASPARTATE--TRNA LIGASE, CYTOPLASMIC	Abietic acid	Lipids and lipid-like molecules	Prenol lipids	Diterpenoids
Glyma.17G223600	M303T840_NEG	-0.514455	0.0289344	ASPARTYL/LYSYL-TRNA SYNTHETASE // ASPARTATE--TRNA LIGASE, CYTOPLASMIC	Discadenine	Organic acids and derivatives	Carboxylic acids and derivatives	Amino acids, peptides, and analogues
Glyma.17G223600	M305T814_POS	0.575924	0.012374	ASPARTYL/LYSYL-TRNA SYNTHETASE // ASPARTATE--TRNA LIGASE, CYTOPLASMIC	3-Acetoxy-9-heptadecene-4,6-diyn-8-ol.	Lipids and lipid-like molecules	Fatty Acyls	Fatty alcohol esters
Glyma.17G223600	M308T421_POS	-0.591365	0.00974235	ASPARTYL/LYSYL-TRNA SYNTHETASE // ASPARTATE--TRNA LIGASE, CYTOPLASMIC	Dihydroascorbigen	Organoheterocyclic compounds	Indoles and derivatives	Indoles
Glyma.17G223600	M313T734_NEG	0.562271	0.0151471	ASPARTYL/LYSYL-TRNA SYNTHETASE // ASPARTATE--TRNA LIGASE, CYTOPLASMIC	12,13-DHOME	Lipids and lipid-like molecules	Fatty Acyls	Fatty acids and conjugates
Glyma.17G223600	M314T150_NEG	-0.608417	0.00737889	ASPARTYL/LYSYL-TRNA SYNTHETASE // ASPARTATE--TRNA LIGASE, CYTOPLASMIC	Citpressine II	Organoheterocyclic compounds	Quinolines and derivatives	Benzoquinolines
Glyma.17G223600	M322T702_NEG	0.630059	0.00506944	ASPARTYL/LYSYL-TRNA SYNTHETASE // ASPARTATE--TRNA LIGASE, CYTOPLASMIC	(-)-Jasmonoyl-L-isoleucine	Organic acids and derivatives	Carboxylic acids and derivatives	Amino acids, peptides, and analogues
Glyma.17G223600	M327T653_NEG	0.513977	0.0291094	ASPARTYL/LYSYL-TRNA SYNTHETASE // ASPARTATE--TRNA LIGASE, CYTOPLASMIC	CIF 2	Organic acids and derivatives	Carboxylic acids and derivatives	Amino acids, peptides, and analogues
Glyma.17G223600	M331T724_POS	0.516397	0.0282316	ASPARTYL/LYSYL-TRNA SYNTHETASE // ASPARTATE--TRNA LIGASE, CYTOPLASMIC	(7Z,10Z,13Z,16Z,19Z)-Docosapentaenoic acid	Lipids and lipid-like molecules	Fatty Acyls	Fatty acids and conjugates
Glyma.17G223600	M337T69_POS	-0.553517	0.0171702	ASPARTYL/LYSYL-TRNA SYNTHETASE // ASPARTATE--TRNA LIGASE, CYTOPLASMIC	5-O-Caffeoylshikimic acid	Phenylpropanoids and polyketides	Cinnamic acids and derivatives	Hydroxycinnamic acids and derivatives
Glyma.17G223600	M338T700_POS	0.550848	0.0178276	ASPARTYL/LYSYL-TRNA SYNTHETASE // ASPARTATE--TRNA LIGASE, CYTOPLASMIC	5-Hydroxymethyldeoxycytidylate	Nucleosides, nucleotides, and analogues	Pyrimidine nucleotides	Pyrimidine deoxyribonucleotides
Glyma.17G223600	M338T840_NEG	-0.560417	0.0155589	ASPARTYL/LYSYL-TRNA SYNTHETASE // ASPARTATE--TRNA LIGASE, CYTOPLASMIC	Yukomine	Organoheterocyclic compounds	Quinolines and derivatives	Benzoquinolines
Glyma.17G223600	M339T419_POS	-0.542674	0.0199657	ASPARTYL/LYSYL-TRNA SYNTHETASE // ASPARTATE--TRNA LIGASE, CYTOPLASMIC	1-Caffeoyl-4-deoxyquinic acid	Phenylpropanoids and polyketides	Cinnamic acids and derivatives	Hydroxycinnamic acids and derivatives
Glyma.17G223600	M341T258_NEG	-0.545999	0.0190728	ASPARTYL/LYSYL-TRNA SYNTHETASE // ASPARTATE--TRNA LIGASE, CYTOPLASMIC	1-Caffeoyl-beta-D-glucose	Phenylpropanoids and polyketides	Cinnamic acids and derivatives	Hydroxycinnamic acids and derivatives
Glyma.17G223600	M342T258_NEG	-0.53877	0.0210555	ASPARTYL/LYSYL-TRNA SYNTHETASE // ASPARTATE--TRNA LIGASE, CYTOPLASMIC	DIBOA-Glc	Organic oxygen compounds	Organooxygen compounds	Carbohydrates and carbohydrate conjugates
Glyma.17G223600	M345T433_POS	-0.542865	0.0199136	ASPARTYL/LYSYL-TRNA SYNTHETASE // ASPARTATE--TRNA LIGASE, CYTOPLASMIC	Melibiitol	Lipids and lipid-like molecules	Fatty Acyls	Fatty acyl glycosides
Glyma.17G223600	M347T786_POS	0.741433	0.000429327	ASPARTYL/LYSYL-TRNA SYNTHETASE // ASPARTATE--TRNA LIGASE, CYTOPLASMIC	Corticosterone	Lipids and lipid-like molecules	Steroids and steroid derivatives	Hydroxysteroids
Glyma.17G223600	M353T150_POS	-0.63192	0.00490218	ASPARTYL/LYSYL-TRNA SYNTHETASE // ASPARTATE--TRNA LIGASE, CYTOPLASMIC	Arbutin 6-phosphate	Organic oxygen compounds	Organooxygen compounds	Carbohydrates and carbohydrate conjugates
Glyma.17G223600	M353T649_1_POS	-0.668029	0.00244576	ASPARTYL/LYSYL-TRNA SYNTHETASE // ASPARTATE--TRNA LIGASE, CYTOPLASMIC	Citrusinol	Phenylpropanoids and polyketides	Flavonoids	Pyranoflavonoids
Glyma.17G223600	M355T451_NEG	-0.528533	0.0241357	ASPARTYL/LYSYL-TRNA SYNTHETASE // ASPARTATE--TRNA LIGASE, CYTOPLASMIC	Gentiopicrin	Organic oxygen compounds	Organooxygen compounds	Carbohydrates and carbohydrate conjugates
Glyma.17G223600	M356T767_POS	-0.54587	0.019107	ASPARTYL/LYSYL-TRNA SYNTHETASE // ASPARTATE--TRNA LIGASE, CYTOPLASMIC	Arachidoyl Ethanolamide	Organic nitrogen compounds	Organonitrogen compounds	Amines
Glyma.17G223600	M357T455_NEG	-0.519274	0.027215	ASPARTYL/LYSYL-TRNA SYNTHETASE // ASPARTATE--TRNA LIGASE, CYTOPLASMIC	Dehydrodiconiferyl alcohol	Phenylpropanoids and polyketides	2-arylbenzofuran flavonoids
Glyma.17G223600	M359T291_POS	-0.517707	0.027765	ASPARTYL/LYSYL-TRNA SYNTHETASE // ASPARTATE--TRNA LIGASE, CYTOPLASMIC	10-Deoxygeniposidic acid	Lipids and lipid-like molecules	Prenol lipids	Terpene glycosides
Glyma.17G223600	M371T648_POS	-0.643746	0.00394114	ASPARTYL/LYSYL-TRNA SYNTHETASE // ASPARTATE--TRNA LIGASE, CYTOPLASMIC	4,4'-Bis(2-carboxyvinyl)-3,3'-dimethoxydiphenyl ether	Benzenoids	Benzene and substituted derivatives	Diphenylethers
Glyma.17G223600	M373T732_POS	0.679122	0.00193904	ASPARTYL/LYSYL-TRNA SYNTHETASE // ASPARTATE--TRNA LIGASE, CYTOPLASMIC	5,7,2',3',4'-Pentamethoxyflavone	Phenylpropanoids and polyketides	Flavonoids	O-methylated flavonoids
Glyma.17G223600	M375T511_POS	-0.530147	0.0236279	ASPARTYL/LYSYL-TRNA SYNTHETASE // ASPARTATE--TRNA LIGASE, CYTOPLASMIC	Deoxyloganin	Lipids and lipid-like molecules	Prenol lipids	Terpene glycosides
Glyma.17G223600	M384T434_POS	-0.559349	0.0158002	ASPARTYL/LYSYL-TRNA SYNTHETASE // ASPARTATE--TRNA LIGASE, CYTOPLASMIC	Tolfenpyrad	Benzenoids	Benzene and substituted derivatives	Diphenylethers
Glyma.17G223600	M391T699_NEG	0.516298	0.0282669	ASPARTYL/LYSYL-TRNA SYNTHETASE // ASPARTATE--TRNA LIGASE, CYTOPLASMIC	5-O-Demethylnobiletin
Glyma.17G223600	M400T436_POS	-0.511218	0.0301356	ASPARTYL/LYSYL-TRNA SYNTHETASE // ASPARTATE--TRNA LIGASE, CYTOPLASMIC	Narcotoline	Alkaloids and derivatives	Phthalide isoquinolines	NA
Glyma.17G223600	M427T380_NEG	-0.56607	0.0143304	ASPARTYL/LYSYL-TRNA SYNTHETASE // ASPARTATE--TRNA LIGASE, CYTOPLASMIC	(13S,14R)-1-Hydroxy-13-O-acetyl-N-methylcanadine	Alkaloids and derivatives	Protoberberine alkaloids and derivatives	NA
Glyma.17G223600	M449T412_POS	0.581659	0.0113374	ASPARTYL/LYSYL-TRNA SYNTHETASE // ASPARTATE--TRNA LIGASE, CYTOPLASMIC	Acuminoside	Lipids and lipid-like molecules	Prenol lipids	Terpene glycosides
Glyma.17G223600	M461T439_NEG	0.588317	0.0102224	ASPARTYL/LYSYL-TRNA SYNTHETASE // ASPARTATE--TRNA LIGASE, CYTOPLASMIC	gamma-L-Glutamyl-S-(hercyn-2-yl)-L-cysteine S-oxide	Organic acids and derivatives	Carboxylic acids and derivatives	Amino acids, peptides, and analogues
Glyma.17G223600	M462T445_POS	-0.591661	0.00969667	ASPARTYL/LYSYL-TRNA SYNTHETASE // ASPARTATE--TRNA LIGASE, CYTOPLASMIC	D-Glucosylsphingosine	Lipids and lipid-like molecules	Sphingolipids	Glycosphingolipids
Glyma.17G223600	M471T243_NEG	0.505851	0.0322121	ASPARTYL/LYSYL-TRNA SYNTHETASE // ASPARTATE--TRNA LIGASE, CYTOPLASMIC	Hassmarin	Phenylpropanoids and polyketides	Coumarins and derivatives	Pyranocoumarins
Glyma.17G223600	M482T944_NEG	-0.567121	0.0141106	ASPARTYL/LYSYL-TRNA SYNTHETASE // ASPARTATE--TRNA LIGASE, CYTOPLASMIC	C31-phthiodiolone A
Glyma.17G223600	M484T944_NEG	-0.548642	0.0183859	ASPARTYL/LYSYL-TRNA SYNTHETASE // ASPARTATE--TRNA LIGASE, CYTOPLASMIC	C31-phthiotriol
Glyma.17G223600	M490T337_NEG	-0.536216	0.0217934	ASPARTYL/LYSYL-TRNA SYNTHETASE // ASPARTATE--TRNA LIGASE, CYTOPLASMIC	Demethylalangiside	Organic oxygen compounds	Organooxygen compounds	Carbohydrates and carbohydrate conjugates
Glyma.17G223600	M496T670_POS	-0.67667	0.00204283	ASPARTYL/LYSYL-TRNA SYNTHETASE // ASPARTATE--TRNA LIGASE, CYTOPLASMIC	N6-(Delta2-isopentenyl)-adenosine 5-diphosphate
Glyma.17G223600	M511T438_POS	-0.547509	0.0186779	ASPARTYL/LYSYL-TRNA SYNTHETASE // ASPARTATE--TRNA LIGASE, CYTOPLASMIC	6',7'-Dihydroxybergamottin decanal acetal	Phenylpropanoids and polyketides	Coumarins and derivatives	Furanocoumarins
Glyma.17G223600	M515T649_POS	-0.631325	0.00495518	ASPARTYL/LYSYL-TRNA SYNTHETASE // ASPARTATE--TRNA LIGASE, CYTOPLASMIC	2'',6''-O-Diacetyloninin	Phenylpropanoids and polyketides	Isoflavonoids	Isoflavonoid O-glycosides
Glyma.17G223600	M521T341_POS	-0.511025	0.0302081	ASPARTYL/LYSYL-TRNA SYNTHETASE // ASPARTATE--TRNA LIGASE, CYTOPLASMIC	Ichanexic acid	Lipids and lipid-like molecules	Prenol lipids	Terpene lactones
Glyma.17G223600	M534T491_POS	-0.608711	0.00734261	ASPARTYL/LYSYL-TRNA SYNTHETASE // ASPARTATE--TRNA LIGASE, CYTOPLASMIC	CDP-abequose	Nucleosides, nucleotides, and analogues	Pyrimidine nucleotides	Pyrimidine nucleotide sugars
Glyma.17G223600	M547T141_NEG	-0.552072	0.0175236	ASPARTYL/LYSYL-TRNA SYNTHETASE // ASPARTATE--TRNA LIGASE, CYTOPLASMIC	Neobetanin	Organic oxygen compounds	Organooxygen compounds	Carbohydrates and carbohydrate conjugates
Glyma.17G223600	M551T379_NEG	-0.529736	0.0237565	ASPARTYL/LYSYL-TRNA SYNTHETASE // ASPARTATE--TRNA LIGASE, CYTOPLASMIC	Lactucaside	Lignans, neolignans and related compounds	Lignan glycosides
Glyma.17G223600	M575T466_POS	-0.547731	0.0186204	ASPARTYL/LYSYL-TRNA SYNTHETASE // ASPARTATE--TRNA LIGASE, CYTOPLASMIC	Stigmasterol-3-O-beta-D-glucopyranoside	Lipids and lipid-like molecules	Steroids and steroid derivatives	Stigmastanes and derivatives
Glyma.17G223600	M578T517_POS	-0.554716	0.016881	ASPARTYL/LYSYL-TRNA SYNTHETASE // ASPARTATE--TRNA LIGASE, CYTOPLASMIC	C37-phenolphthiocerol A
Glyma.17G223600	M613T608_NEG	0.607086	0.00754476	ASPARTYL/LYSYL-TRNA SYNTHETASE // ASPARTATE--TRNA LIGASE, CYTOPLASMIC	Neomycin B	Organic oxygen compounds	Organooxygen compounds	Carbohydrates and carbohydrate conjugates
Glyma.17G223600	M629T490_NEG	0.620507	0.00600269	ASPARTYL/LYSYL-TRNA SYNTHETASE // ASPARTATE--TRNA LIGASE, CYTOPLASMIC	GDP-4-acetamido-4,6-dideoxy-alpha-D-mannose	Nucleosides, nucleotides, and analogues	Purine nucleotides	Purine nucleotide sugars
Glyma.17G223600	M640T413_POS	0.634828	0.00464981	ASPARTYL/LYSYL-TRNA SYNTHETASE // ASPARTATE--TRNA LIGASE, CYTOPLASMIC	Demethyl-desacetyl-rifamycin S	Phenylpropanoids and polyketides	Macrolactams	NA
Glyma.17G223600	M852T507_POS	-0.522213	0.0262063	ASPARTYL/LYSYL-TRNA SYNTHETASE // ASPARTATE--TRNA LIGASE, CYTOPLASMIC	3-demethylubiquinol-10
Glyma.17G223600	M883T701_NEG	0.576116	0.0123381	ASPARTYL/LYSYL-TRNA SYNTHETASE // ASPARTATE--TRNA LIGASE, CYTOPLASMIC	Pennogenin 3-O-beta-chacotrioside	Lipids and lipid-like molecules	Steroids and steroid derivatives	Steroidal glycosides
Glyma.17G223600	M90T68_POS	0.563955	0.0147807	ASPARTYL/LYSYL-TRNA SYNTHETASE // ASPARTATE--TRNA LIGASE, CYTOPLASMIC	beta-Alanine	Organic acids and derivatives	Carboxylic acids and derivatives	Amino acids, peptides, and analogues
Glyma.17G223600	M974T533_3_POS	0.584845	0.0107923	ASPARTYL/LYSYL-TRNA SYNTHETASE // ASPARTATE--TRNA LIGASE, CYTOPLASMIC	Sinapoyl-CoA	Lipids and lipid-like molecules	Fatty Acyls	Fatty acyl thioesters
Glyma.20G177400	M142T225_POS	-0.516096	0.0283396	aspartyl-tRNA(Asn)/glutamyl-tRNA(Gln) amidotransferase subunit C (gatC, GATC)	O-phosphoethanolamine
Glyma.20G177400	M169T929_NEG	0.517356	0.0278895	aspartyl-tRNA(Asn)/glutamyl-tRNA(Gln) amidotransferase subunit C (gatC, GATC)	Gallic acid	Benzenoids	Benzene and substituted derivatives	Benzoic acids and derivatives
Glyma.20G177400	M173T928_NEG	0.553696	0.0171268	aspartyl-tRNA(Asn)/glutamyl-tRNA(Gln) amidotransferase subunit C (gatC, GATC)	cis-Aconitic acid	Organic acids and derivatives	Carboxylic acids and derivatives	Tricarboxylic acids and derivatives
Glyma.20G177400	M176T586_POS	0.537024	0.0215576	aspartyl-tRNA(Asn)/glutamyl-tRNA(Gln) amidotransferase subunit C (gatC, GATC)	Sulforaphene	Organosulfur compounds	Sulfoxides
Glyma.20G177400	M183T520_POS	-0.651135	0.00342319	aspartyl-tRNA(Asn)/glutamyl-tRNA(Gln) amidotransferase subunit C (gatC, GATC)	Triethylphosphate	Organic acids and derivatives	Organic phosphoric acids and derivatives	Phosphate esters
Glyma.20G177400	M183T622_NEG	-0.501756	0.0338693	aspartyl-tRNA(Asn)/glutamyl-tRNA(Gln) amidotransferase subunit C (gatC, GATC)	3-phosphooxypyruvate
Glyma.20G177400	M203T330_NEG	-0.61554	0.00654042	aspartyl-tRNA(Asn)/glutamyl-tRNA(Gln) amidotransferase subunit C (gatC, GATC)	Solsodomine A	Organoheterocyclic compounds	Pyrroles	Substituted pyrroles
Glyma.20G177400	M217T931_POS	0.553949	0.0170656	aspartyl-tRNA(Asn)/glutamyl-tRNA(Gln) amidotransferase subunit C (gatC, GATC)	Lycoperodine 1	Organoheterocyclic compounds	Indoles and derivatives	Pyridoindoles
Glyma.20G177400	M223T934_POS	-0.605879	0.00769781	aspartyl-tRNA(Asn)/glutamyl-tRNA(Gln) amidotransferase subunit C (gatC, GATC)	1,2-Diphenyl-2-buten-1-one	Phenylpropanoids and polyketides	Stilbenes
Glyma.20G177400	M225T351_POS	0.50672	0.0318683	aspartyl-tRNA(Asn)/glutamyl-tRNA(Gln) amidotransferase subunit C (gatC, GATC)	Methyl jasmonate	Lipids and lipid-like molecules	Fatty Acyls	Lineolic acids and derivatives
Glyma.20G177400	M259T824_POS	0.54204	0.0201394	aspartyl-tRNA(Asn)/glutamyl-tRNA(Gln) amidotransferase subunit C (gatC, GATC)	Tetradecanedioic acid	Lipids and lipid-like molecules	Fatty Acyls	Fatty acids and conjugates
Glyma.20G177400	M261T380_POS	-0.612878	0.00684421	aspartyl-tRNA(Asn)/glutamyl-tRNA(Gln) amidotransferase subunit C (gatC, GATC)	S-Methyl-5-thio-D-ribose 1-phosphate	Organic oxygen compounds	Organooxygen compounds	Carbohydrates and carbohydrate conjugates
Glyma.20G177400	M262T332_NEG	0.540642	0.0205271	aspartyl-tRNA(Asn)/glutamyl-tRNA(Gln) amidotransferase subunit C (gatC, GATC)	Thiamine aldehyde	Organoheterocyclic compounds	Diazines	Pyrimidines and pyrimidine derivatives
Glyma.20G177400	M287T369_POS	0.502202	0.0336854	aspartyl-tRNA(Asn)/glutamyl-tRNA(Gln) amidotransferase subunit C (gatC, GATC)	kaempferol	Phenylpropanoids and polyketides	Flavonoids	Flavones
Glyma.20G177400	M289T449_NEG	0.500832	0.034252	aspartyl-tRNA(Asn)/glutamyl-tRNA(Gln) amidotransferase subunit C (gatC, GATC)	Indole-3-acetyl-L-aspartic acid	Organic acids and derivatives	Carboxylic acids and derivatives	Amino acids, peptides, and analogues
Glyma.20G177400	M326T442_POS	-0.50176	0.0338676	aspartyl-tRNA(Asn)/glutamyl-tRNA(Gln) amidotransferase subunit C (gatC, GATC)	Farnesylcysteine	Lipids and lipid-like molecules	Prenol lipids	Sesquiterpenoids
Glyma.20G177400	M337T840_NEG	0.519332	0.0271948	aspartyl-tRNA(Asn)/glutamyl-tRNA(Gln) amidotransferase subunit C (gatC, GATC)	8-Geranyloxypsoralen	Lipids and lipid-like molecules	Prenol lipids	Terpene lactones
Glyma.20G177400	M377T346_POS	0.537263	0.0214884	aspartyl-tRNA(Asn)/glutamyl-tRNA(Gln) amidotransferase subunit C (gatC, GATC)	Riboflavin	Organoheterocyclic compounds	Pteridines and derivatives	Alloxazines and isoalloxazines
Glyma.20G177400	M398T511_POS	0.521777	0.0263541	aspartyl-tRNA(Asn)/glutamyl-tRNA(Gln) amidotransferase subunit C (gatC, GATC)	2-Methylthioribosyl-trans-zeatin	Nucleosides, nucleotides, and analogues	Purine nucleosides
Glyma.20G177400	M429T236_POS	-0.512078	0.0298126	aspartyl-tRNA(Asn)/glutamyl-tRNA(Gln) amidotransferase subunit C (gatC, GATC)	IDP
Glyma.20G177400	M435T293_POS	-0.50157	0.033946	aspartyl-tRNA(Asn)/glutamyl-tRNA(Gln) amidotransferase subunit C (gatC, GATC)	Naringenin 5-O-glucoside	Phenylpropanoids and polyketides	Flavonoids	Flavonoid glycosides
Glyma.20G177400	M482T944_NEG	0.579324	0.0117507	aspartyl-tRNA(Asn)/glutamyl-tRNA(Gln) amidotransferase subunit C (gatC, GATC)	C31-phthiodiolone A
Glyma.20G177400	M484T944_NEG	0.608186	0.00740751	aspartyl-tRNA(Asn)/glutamyl-tRNA(Gln) amidotransferase subunit C (gatC, GATC)	C31-phthiotriol
Glyma.20G177400	M543T526_POS	0.539601	0.0208197	aspartyl-tRNA(Asn)/glutamyl-tRNA(Gln) amidotransferase subunit C (gatC, GATC)	Chaetoglobosin N	Alkaloids and derivatives	Cytochalasans	Chaetoglobosins
Glyma.20G177400	M547T141_NEG	0.517477	0.0278465	aspartyl-tRNA(Asn)/glutamyl-tRNA(Gln) amidotransferase subunit C (gatC, GATC)	Neobetanin	Organic oxygen compounds	Organooxygen compounds	Carbohydrates and carbohydrate conjugates
Glyma.20G177400	M632T309_2_POS	-0.590195	0.00992447	aspartyl-tRNA(Asn)/glutamyl-tRNA(Gln) amidotransferase subunit C (gatC, GATC)	3,4-dihydroxy-5-all-trans-heptaprenylbenzoate
Glyma.20G177400	M653T439_NEG	-0.520076	0.0269368	aspartyl-tRNA(Asn)/glutamyl-tRNA(Gln) amidotransferase subunit C (gatC, GATC)	Campneoside I	Phenylpropanoids and polyketides	Cinnamic acids and derivatives	Hydroxycinnamic acids and derivatives
Glyma.20G177400	M682T453_NEG	-0.54166	0.0202443	aspartyl-tRNA(Asn)/glutamyl-tRNA(Gln) amidotransferase subunit C (gatC, GATC)	27-O-Demethylrifamycin SV	Phenylpropanoids and polyketides	Macrolactams	NA
Glyma.20G177400	M723T405_3_POS	-0.529578	0.0238061	aspartyl-tRNA(Asn)/glutamyl-tRNA(Gln) amidotransferase subunit C (gatC, GATC)	trypanothione
Glyma.20G177400	M758T371_POS	0.505242	0.0324545	aspartyl-tRNA(Asn)/glutamyl-tRNA(Gln) amidotransferase subunit C (gatC, GATC)	Rubrobrassicin
Glyma.20G177400	M793T393_2_POS	-0.593131	0.00947244	aspartyl-tRNA(Asn)/glutamyl-tRNA(Gln) amidotransferase subunit C (gatC, GATC)	Betavulgaroside II	Lipids and lipid-like molecules	Prenol lipids	Triterpenoids
Glyma.04G065100	M120T460_NEG	0.587008	0.0104344	CYSTEINYL-TRNA SYNTHETASE	L-Cysteine	Organic acids and derivatives	Carboxylic acids and derivatives	Amino acids, peptides, and analogues
Glyma.04G065100	M138T295_POS	-0.509227	0.0308933	CYSTEINYL-TRNA SYNTHETASE	4-Aminobenzoate	Benzenoids	Benzene and substituted derivatives	Benzoic acids and derivatives
Glyma.04G065100	M151T762_POS	-0.618444	0.0062215	CYSTEINYL-TRNA SYNTHETASE	Thymol	Lipids and lipid-like molecules	Prenol lipids	Monoterpenoids
Glyma.04G065100	M169T761_POS	-0.569067	0.0137109	CYSTEINYL-TRNA SYNTHETASE	6-Hydroxy-2,6-dimethyl-2,7-octadien-4-one	Lipids and lipid-like molecules	Prenol lipids	Monoterpenoids
Glyma.04G065100	M171T390_NEG	-0.528737	0.0240712	CYSTEINYL-TRNA SYNTHETASE	1,4-Cyclohexanedicarboxylic acid	Organic acids and derivatives	Carboxylic acids and derivatives	Dicarboxylic acids and derivatives
Glyma.04G065100	M172T390_NEG	-0.518043	0.0276465	CYSTEINYL-TRNA SYNTHETASE	5-Guanidino-2-oxopentanoate	Organic acids and derivatives	Keto acids and derivatives	Short-chain keto acids and derivatives
Glyma.04G065100	M193T806_POS	-0.550122	0.0180099	CYSTEINYL-TRNA SYNTHETASE	Vitispirane	Organoheterocyclic compounds	Tetrahydrofurans
Glyma.04G065100	M201T74_POS	-0.587326	0.0103826	CYSTEINYL-TRNA SYNTHETASE	D-erythrose 4-phosphate
Glyma.04G065100	M215T194_POS	-0.532889	0.0227846	CYSTEINYL-TRNA SYNTHETASE	Dethiobiotin	Lipids and lipid-like molecules	Fatty Acyls	Fatty acids and conjugates
Glyma.04G065100	M229T213_NEG	0.564127	0.0147436	CYSTEINYL-TRNA SYNTHETASE	C20817	Organoheterocyclic compounds	Lactams	Beta lactams
Glyma.04G065100	M238T70_POS	-0.604518	0.00787343	CYSTEINYL-TRNA SYNTHETASE	S-succinylcysteine	Organic acids and derivatives	Carboxylic acids and derivatives	Amino acids, peptides, and analogues
Glyma.04G065100	M252T98_POS	-0.553281	0.0172274	CYSTEINYL-TRNA SYNTHETASE	Deoxyadenosine	Nucleosides, nucleotides, and analogues	Purine nucleosides	Purine 2'-deoxyribonucleosides
Glyma.04G065100	M267T518_POS	0.63242	0.00485799	CYSTEINYL-TRNA SYNTHETASE	3,14-Dihydroxy-11,13-dihydrocostunolide	Lipids and lipid-like molecules	Prenol lipids	Terpene lactones
Glyma.04G065100	M269T389_NEG	-0.610079	0.00717583	CYSTEINYL-TRNA SYNTHETASE	4',6,7-Trihydroxyisoflavone	Phenylpropanoids and polyketides	Isoflavonoids	Isoflav-2-enes
Glyma.04G065100	M277T796_POS	-0.5656	0.0144293	CYSTEINYL-TRNA SYNTHETASE	Dehydrocrepenynic acid	Lipids and lipid-like molecules	Fatty Acyls	Fatty acids and conjugates
Glyma.04G065100	M279T781_POS	-0.530782	0.0234307	CYSTEINYL-TRNA SYNTHETASE	?-linolenic acid	Lipids and lipid-like molecules	Fatty Acyls	Lineolic acids and derivatives
Glyma.04G065100	M287T811_POS	-0.655404	0.00315031	CYSTEINYL-TRNA SYNTHETASE	Retinol	Lipids and lipid-like molecules	Prenol lipids	Retinoids
Glyma.04G065100	M291T743_POS	-0.54886	0.0183301	CYSTEINYL-TRNA SYNTHETASE	Deoxy phytoprostane J1	Lipids and lipid-like molecules	Fatty Acyls	Eicosanoids
Glyma.04G065100	M295T796_POS	-0.56387	0.0147988	CYSTEINYL-TRNA SYNTHETASE	Colneleic acid	Lipids and lipid-like molecules	Fatty Acyls	Fatty acids and conjugates
Glyma.04G065100	M305T814_POS	-0.614075	0.00670616	CYSTEINYL-TRNA SYNTHETASE	3-Acetoxy-9-heptadecene-4,6-diyn-8-ol.	Lipids and lipid-like molecules	Fatty Acyls	Fatty alcohol esters
Glyma.04G065100	M313T734_NEG	-0.61181	0.00696929	CYSTEINYL-TRNA SYNTHETASE	12,13-DHOME	Lipids and lipid-like molecules	Fatty Acyls	Fatty acids and conjugates
Glyma.04G065100	M322T702_NEG	-0.522084	0.0262499	CYSTEINYL-TRNA SYNTHETASE	(-)-Jasmonoyl-L-isoleucine	Organic acids and derivatives	Carboxylic acids and derivatives	Amino acids, peptides, and analogues
Glyma.04G065100	M329T783_POS	-0.587973	0.0102778	CYSTEINYL-TRNA SYNTHETASE	(4Z,7Z,10Z,13Z,16Z,19Z)-Docosahexaenoic acid	Lipids and lipid-like molecules	Fatty Acyls	Fatty acids and conjugates
Glyma.04G065100	M331T724_POS	-0.540709	0.0205086	CYSTEINYL-TRNA SYNTHETASE	(7Z,10Z,13Z,16Z,19Z)-Docosapentaenoic acid	Lipids and lipid-like molecules	Fatty Acyls	Fatty acids and conjugates
Glyma.04G065100	M332T229_NEG	0.60421	0.00791357	CYSTEINYL-TRNA SYNTHETASE	Glucocapparin	Organic oxygen compounds	Organooxygen compounds	Carbohydrates and carbohydrate conjugates
Glyma.04G065100	M339T419_POS	0.50678	0.0318448	CYSTEINYL-TRNA SYNTHETASE	1-Caffeoyl-4-deoxyquinic acid	Phenylpropanoids and polyketides	Cinnamic acids and derivatives	Hydroxycinnamic acids and derivatives
Glyma.04G065100	M345T861_POS	-0.523758	0.0256876	CYSTEINYL-TRNA SYNTHETASE	SB 205607	Organoheterocyclic compounds	Quinolines and derivatives	Phenylquinolines
Glyma.04G065100	M347T786_POS	-0.70478	0.00109048	CYSTEINYL-TRNA SYNTHETASE	Corticosterone	Lipids and lipid-like molecules	Steroids and steroid derivatives	Hydroxysteroids
Glyma.04G065100	M350T742_POS	-0.504247	0.0328534	CYSTEINYL-TRNA SYNTHETASE	1-(2-carboxyphenylamino)-1-deoxy-D-ribulose 5-phosphate
Glyma.04G065100	M363T922_NEG	-0.546317	0.018989	CYSTEINYL-TRNA SYNTHETASE	XMP
Glyma.04G065100	M391T699_NEG	-0.537359	0.0214606	CYSTEINYL-TRNA SYNTHETASE	5-O-Demethylnobiletin
Glyma.04G065100	M426T439_NEG	-0.559633	0.0157357	CYSTEINYL-TRNA SYNTHETASE	ADP group
Glyma.04G065100	M456T345_NEG	0.532389	0.0229366	CYSTEINYL-TRNA SYNTHETASE	Amygdalin	Organic oxygen compounds	Organooxygen compounds	Carbohydrates and carbohydrate conjugates
Glyma.04G065100	M457T870_POS	-0.586379	0.0105376	CYSTEINYL-TRNA SYNTHETASE	Oleanolic acid	Lipids and lipid-like molecules	Prenol lipids	Triterpenoids
Glyma.04G065100	M483T518_POS	0.607003	0.0075553	CYSTEINYL-TRNA SYNTHETASE	Gentamicin X2	Organic oxygen compounds	Organooxygen compounds	Carbohydrates and carbohydrate conjugates
Glyma.04G065100	M490T337_NEG	0.537208	0.0215043	CYSTEINYL-TRNA SYNTHETASE	Demethylalangiside	Organic oxygen compounds	Organooxygen compounds	Carbohydrates and carbohydrate conjugates
Glyma.04G065100	M547T141_NEG	0.521567	0.0264254	CYSTEINYL-TRNA SYNTHETASE	Neobetanin	Organic oxygen compounds	Organooxygen compounds	Carbohydrates and carbohydrate conjugates
Glyma.04G065100	M640T413_POS	-0.525831	0.0250045	CYSTEINYL-TRNA SYNTHETASE	Demethyl-desacetyl-rifamycin S	Phenylpropanoids and polyketides	Macrolactams	NA
Glyma.04G065100	M663T682_POS	0.589693	0.0100034	CYSTEINYL-TRNA SYNTHETASE	Prosapogenin	Lipids and lipid-like molecules	Prenol lipids	Terpene glycosides
Glyma.06G066300	M106T70_POS	-0.55228	0.0174725	CYSTEINYL-TRNA SYNTHETASE	L-Serine	Organic acids and derivatives	Carboxylic acids and derivatives	Amino acids, peptides, and analogues
Glyma.06G066300	M138T295_POS	-0.506862	0.0318124	CYSTEINYL-TRNA SYNTHETASE	4-Aminobenzoate	Benzenoids	Benzene and substituted derivatives	Benzoic acids and derivatives
Glyma.06G066300	M147T69_POS	-0.515255	0.028643	CYSTEINYL-TRNA SYNTHETASE	L-Glutamine	Organic acids and derivatives	Carboxylic acids and derivatives	Amino acids, peptides, and analogues
Glyma.06G066300	M148T929_NEG	0.532178	0.0230011	CYSTEINYL-TRNA SYNTHETASE	Benzyl isothiocyanate	Benzenoids	Benzene and substituted derivatives
Glyma.06G066300	M151T762_POS	-0.636885	0.00447776	CYSTEINYL-TRNA SYNTHETASE	Thymol	Lipids and lipid-like molecules	Prenol lipids	Monoterpenoids
Glyma.06G066300	M157T938_POS	-0.616308	0.00645481	CYSTEINYL-TRNA SYNTHETASE	2-Phosphoglycolate	Organic acids and derivatives	Organic phosphoric acids and derivatives	Phosphate esters
Glyma.06G066300	M169T761_POS	-0.628449	0.00521791	CYSTEINYL-TRNA SYNTHETASE	6-Hydroxy-2,6-dimethyl-2,7-octadien-4-one	Lipids and lipid-like molecules	Prenol lipids	Monoterpenoids
Glyma.06G066300	M177T695_POS	-0.527838	0.0243568	CYSTEINYL-TRNA SYNTHETASE	4-deoxy-L-threo-hex-4-enopyranuronate
Glyma.06G066300	M185T66_POS	-0.566908	0.014155	CYSTEINYL-TRNA SYNTHETASE	5-Hydroxyisourate	Organoheterocyclic compounds	Imidazopyrimidines	Purines and purine derivatives
Glyma.06G066300	M189T697_POS	0.503684	0.0330809	CYSTEINYL-TRNA SYNTHETASE	7,8-Diaminononanoate	Lipids and lipid-like molecules	Fatty Acyls	Fatty acids and conjugates
Glyma.06G066300	M191T595_POS	-0.617312	0.00634427	CYSTEINYL-TRNA SYNTHETASE	beta-Damascenone	Organic oxygen compounds	Organooxygen compounds	Carbonyl compounds
Glyma.06G066300	M193T806_POS	-0.584746	0.0108089	CYSTEINYL-TRNA SYNTHETASE	Vitispirane	Organoheterocyclic compounds	Tetrahydrofurans
Glyma.06G066300	M201T74_POS	-0.591568	0.00971094	CYSTEINYL-TRNA SYNTHETASE	D-erythrose 4-phosphate
Glyma.06G066300	M205T928_NEG	0.536474	0.021718	CYSTEINYL-TRNA SYNTHETASE	3-Oxalomalate	Organic acids and derivatives	Carboxylic acids and derivatives	Tricarboxylic acids and derivatives
Glyma.06G066300	M209T604_POS	-0.565523	0.0144457	CYSTEINYL-TRNA SYNTHETASE	alpha-Asarone	Benzenoids	Phenol ethers	Anisoles
Glyma.06G066300	M215T194_POS	-0.623947	0.00565179	CYSTEINYL-TRNA SYNTHETASE	Dethiobiotin	Lipids and lipid-like molecules	Fatty Acyls	Fatty acids and conjugates
Glyma.06G066300	M229T213_NEG	0.509759	0.0306892	CYSTEINYL-TRNA SYNTHETASE	C20817	Organoheterocyclic compounds	Lactams	Beta lactams
Glyma.06G066300	M237T723_NEG	-0.546122	0.0190403	CYSTEINYL-TRNA SYNTHETASE	OPC-4:0	Organic oxygen compounds	Organooxygen compounds	Carbonyl compounds
Glyma.06G066300	M237T724_POS	-0.647854	0.00364583	CYSTEINYL-TRNA SYNTHETASE	Aubergenone	Lipids and lipid-like molecules	Prenol lipids	Sesquiterpenoids
Glyma.06G066300	M238T70_POS	-0.559469	0.015773	CYSTEINYL-TRNA SYNTHETASE	S-succinylcysteine	Organic acids and derivatives	Carboxylic acids and derivatives	Amino acids, peptides, and analogues
Glyma.06G066300	M267T518_POS	0.541086	0.0204034	CYSTEINYL-TRNA SYNTHETASE	3,14-Dihydroxy-11,13-dihydrocostunolide	Lipids and lipid-like molecules	Prenol lipids	Terpene lactones
Glyma.06G066300	M273T639_POS	-0.544156	0.0195637	CYSTEINYL-TRNA SYNTHETASE	Naringenin chalcone	Phenylpropanoids and polyketides	Linear 1,3-diarylpropanoids	Chalcones and dihydrochalcones
Glyma.06G066300	M277T796_POS	-0.648883	0.00357479	CYSTEINYL-TRNA SYNTHETASE	Dehydrocrepenynic acid	Lipids and lipid-like molecules	Fatty Acyls	Fatty acids and conjugates
Glyma.06G066300	M279T781_POS	-0.722777	0.000702383	CYSTEINYL-TRNA SYNTHETASE	?-linolenic acid	Lipids and lipid-like molecules	Fatty Acyls	Lineolic acids and derivatives
Glyma.06G066300	M287T811_POS	-0.615964	0.00649296	CYSTEINYL-TRNA SYNTHETASE	Retinol	Lipids and lipid-like molecules	Prenol lipids	Retinoids
Glyma.06G066300	M291T743_POS	-0.606351	0.00763769	CYSTEINYL-TRNA SYNTHETASE	Deoxy phytoprostane J1	Lipids and lipid-like molecules	Fatty Acyls	Eicosanoids
Glyma.06G066300	M295T796_POS	-0.658637	0.00295577	CYSTEINYL-TRNA SYNTHETASE	Colneleic acid	Lipids and lipid-like molecules	Fatty Acyls	Fatty acids and conjugates
Glyma.06G066300	M302T722_POS	-0.556995	0.0163422	CYSTEINYL-TRNA SYNTHETASE	CIF 3
Glyma.06G066300	M303T499_3_POS	0.540627	0.0205313	CYSTEINYL-TRNA SYNTHETASE	Abietic acid	Lipids and lipid-like molecules	Prenol lipids	Diterpenoids
Glyma.06G066300	M303T840_NEG	0.5207	0.0267219	CYSTEINYL-TRNA SYNTHETASE	Discadenine	Organic acids and derivatives	Carboxylic acids and derivatives	Amino acids, peptides, and analogues
Glyma.06G066300	M305T814_POS	-0.691666	0.00147385	CYSTEINYL-TRNA SYNTHETASE	3-Acetoxy-9-heptadecene-4,6-diyn-8-ol.	Lipids and lipid-like molecules	Fatty Acyls	Fatty alcohol esters
Glyma.06G066300	M313T734_NEG	-0.717779	0.000796241	CYSTEINYL-TRNA SYNTHETASE	12,13-DHOME	Lipids and lipid-like molecules	Fatty Acyls	Fatty acids and conjugates
Glyma.06G066300	M321T870_POS	-0.602992	0.00807411	CYSTEINYL-TRNA SYNTHETASE	Anomallotusin
Glyma.06G066300	M327T374_POS	0.537903	0.0213036	CYSTEINYL-TRNA SYNTHETASE	Humilixanthin	Organic acids and derivatives	Carboxylic acids and derivatives	Amino acids, peptides, and analogues
Glyma.06G066300	M329T783_POS	-0.58036	0.0115658	CYSTEINYL-TRNA SYNTHETASE	(4Z,7Z,10Z,13Z,16Z,19Z)-Docosahexaenoic acid	Lipids and lipid-like molecules	Fatty Acyls	Fatty acids and conjugates
Glyma.06G066300	M331T724_POS	-0.58503	0.0107614	CYSTEINYL-TRNA SYNTHETASE	(7Z,10Z,13Z,16Z,19Z)-Docosapentaenoic acid	Lipids and lipid-like molecules	Fatty Acyls	Fatty acids and conjugates
Glyma.06G066300	M338T700_POS	-0.620962	0.00595528	CYSTEINYL-TRNA SYNTHETASE	5-Hydroxymethyldeoxycytidylate	Nucleosides, nucleotides, and analogues	Pyrimidine nucleotides	Pyrimidine deoxyribonucleotides
Glyma.06G066300	M347T786_POS	-0.761092	0.000244115	CYSTEINYL-TRNA SYNTHETASE	Corticosterone	Lipids and lipid-like molecules	Steroids and steroid derivatives	Hydroxysteroids
Glyma.06G066300	M350T742_POS	-0.597002	0.00890197	CYSTEINYL-TRNA SYNTHETASE	1-(2-carboxyphenylamino)-1-deoxy-D-ribulose 5-phosphate
Glyma.06G066300	M353T693_POS	-0.531357	0.0232529	CYSTEINYL-TRNA SYNTHETASE	Anileridine	Organoheterocyclic compounds	Piperidines	Phenylpiperidines
Glyma.06G066300	M363T922_NEG	-0.660314	0.0028588	CYSTEINYL-TRNA SYNTHETASE	XMP
Glyma.06G066300	M391T699_NEG	-0.684367	0.00173162	CYSTEINYL-TRNA SYNTHETASE	5-O-Demethylnobiletin
Glyma.06G066300	M413T465_2_POS	0.527722	0.0243941	CYSTEINYL-TRNA SYNTHETASE	Valenciachrome	Lipids and lipid-like molecules	Prenol lipids	Diterpenoids
Glyma.06G066300	M426T439_NEG	-0.588055	0.0102646	CYSTEINYL-TRNA SYNTHETASE	ADP group
Glyma.06G066300	M430T906_POS	-0.504922	0.0325821	CYSTEINYL-TRNA SYNTHETASE	15alpha-Hydroxysolasodine	Lipids and lipid-like molecules	Steroids and steroid derivatives	Steroidal alkaloids
Glyma.06G066300	M457T870_POS	-0.67334	0.00219106	CYSTEINYL-TRNA SYNTHETASE	Oleanolic acid	Lipids and lipid-like molecules	Prenol lipids	Triterpenoids
Glyma.06G066300	M462T445_POS	0.534952	0.0221657	CYSTEINYL-TRNA SYNTHETASE	D-Glucosylsphingosine	Lipids and lipid-like molecules	Sphingolipids	Glycosphingolipids
Glyma.06G066300	M471T243_NEG	-0.51523	0.0286522	CYSTEINYL-TRNA SYNTHETASE	Hassmarin	Phenylpropanoids and polyketides	Coumarins and derivatives	Pyranocoumarins
Glyma.06G066300	M483T518_POS	0.528038	0.0242932	CYSTEINYL-TRNA SYNTHETASE	Gentamicin X2	Organic oxygen compounds	Organooxygen compounds	Carbohydrates and carbohydrate conjugates
Glyma.06G066300	M490T337_NEG	0.536691	0.0216545	CYSTEINYL-TRNA SYNTHETASE	Demethylalangiside	Organic oxygen compounds	Organooxygen compounds	Carbohydrates and carbohydrate conjugates
Glyma.06G066300	M496T670_POS	0.573455	0.0128427	CYSTEINYL-TRNA SYNTHETASE	N6-(Delta2-isopentenyl)-adenosine 5-diphosphate
Glyma.06G066300	M567T517_2_POS	0.593729	0.00938255	CYSTEINYL-TRNA SYNTHETASE	3-hydroxyechinenone	Lipids and lipid-like molecules	Prenol lipids	Tetraterpenoids
Glyma.06G066300	M575T466_POS	0.591131	0.00977856	CYSTEINYL-TRNA SYNTHETASE	Stigmasterol-3-O-beta-D-glucopyranoside	Lipids and lipid-like molecules	Steroids and steroid derivatives	Stigmastanes and derivatives
Glyma.06G066300	M578T517_POS	0.611421	0.00701525	CYSTEINYL-TRNA SYNTHETASE	C37-phenolphthiocerol A
Glyma.06G066300	M640T413_POS	-0.589283	0.0100683	CYSTEINYL-TRNA SYNTHETASE	Demethyl-desacetyl-rifamycin S	Phenylpropanoids and polyketides	Macrolactams	NA
Glyma.06G066300	M663T682_POS	0.542468	0.0200219	CYSTEINYL-TRNA SYNTHETASE	Prosapogenin	Lipids and lipid-like molecules	Prenol lipids	Terpene glycosides
Glyma.06G066300	M974T533_3_POS	-0.585263	0.0107224	CYSTEINYL-TRNA SYNTHETASE	Sinapoyl-CoA	Lipids and lipid-like molecules	Fatty Acyls	Fatty acyl thioesters
Glyma.10G272400	M138T295_POS	-0.511201	0.0301417	CYSTEINYL-TRNA SYNTHETASE // CYSTEINE-TRNA LIGASE	4-Aminobenzoate	Benzenoids	Benzene and substituted derivatives	Benzoic acids and derivatives
Glyma.10G272400	M146T206_POS	-0.567639	0.0140033	CYSTEINYL-TRNA SYNTHETASE // CYSTEINE-TRNA LIGASE	2-hydroxy-5-oxoproline
Glyma.10G272400	M157T938_POS	-0.552404	0.017442	CYSTEINYL-TRNA SYNTHETASE // CYSTEINE-TRNA LIGASE	2-Phosphoglycolate	Organic acids and derivatives	Organic phosphoric acids and derivatives	Phosphate esters
Glyma.10G272400	M169T761_POS	-0.512007	0.0298393	CYSTEINYL-TRNA SYNTHETASE // CYSTEINE-TRNA LIGASE	6-Hydroxy-2,6-dimethyl-2,7-octadien-4-one	Lipids and lipid-like molecules	Prenol lipids	Monoterpenoids
Glyma.10G272400	M191T595_POS	-0.50497	0.0325628	CYSTEINYL-TRNA SYNTHETASE // CYSTEINE-TRNA LIGASE	beta-Damascenone	Organic oxygen compounds	Organooxygen compounds	Carbonyl compounds
Glyma.10G272400	M238T70_POS	-0.600135	0.00846091	CYSTEINYL-TRNA SYNTHETASE // CYSTEINE-TRNA LIGASE	S-succinylcysteine	Organic acids and derivatives	Carboxylic acids and derivatives	Amino acids, peptides, and analogues
Glyma.10G272400	M258T660_POS	-0.590837	0.00982418	CYSTEINYL-TRNA SYNTHETASE // CYSTEINE-TRNA LIGASE	Norcraugsodine	Benzenoids	Phenols	Benzenediols
Glyma.10G272400	M265T285_POS	0.574862	0.0125739	CYSTEINYL-TRNA SYNTHETASE // CYSTEINE-TRNA LIGASE	Feruloylputrescine	Phenylpropanoids and polyketides	Cinnamic acids and derivatives	Hydroxycinnamic acids and derivatives
Glyma.10G272400	M287T811_POS	-0.739226	0.000456029	CYSTEINYL-TRNA SYNTHETASE // CYSTEINE-TRNA LIGASE	Retinol	Lipids and lipid-like molecules	Prenol lipids	Retinoids
Glyma.10G272400	M298T830_POS	-0.551287	0.0177181	CYSTEINYL-TRNA SYNTHETASE // CYSTEINE-TRNA LIGASE	N7-methylguanosine
Glyma.10G272400	M305T814_POS	-0.511854	0.0298966	CYSTEINYL-TRNA SYNTHETASE // CYSTEINE-TRNA LIGASE	3-Acetoxy-9-heptadecene-4,6-diyn-8-ol.	Lipids and lipid-like molecules	Fatty Acyls	Fatty alcohol esters
Glyma.10G272400	M347T786_POS	-0.564521	0.0146591	CYSTEINYL-TRNA SYNTHETASE // CYSTEINE-TRNA LIGASE	Corticosterone	Lipids and lipid-like molecules	Steroids and steroid derivatives	Hydroxysteroids
Glyma.10G272400	M363T922_NEG	-0.663345	0.00269023	CYSTEINYL-TRNA SYNTHETASE // CYSTEINE-TRNA LIGASE	XMP
Glyma.10G272400	M383T829_POS	-0.530195	0.0236131	CYSTEINYL-TRNA SYNTHETASE // CYSTEINE-TRNA LIGASE	Histamine-trifluoromethyltoluide	Benzenoids	Benzene and substituted derivatives	Trifluoromethylbenzenes
Glyma.10G272400	M426T439_NEG	-0.561899	0.0152289	CYSTEINYL-TRNA SYNTHETASE // CYSTEINE-TRNA LIGASE	ADP group
Glyma.10G272400	M600T447_2_POS	-0.664123	0.00264827	CYSTEINYL-TRNA SYNTHETASE // CYSTEINE-TRNA LIGASE	5'''-epi-Lividomycin B	Organic oxygen compounds	Organooxygen compounds	Carbohydrates and carbohydrate conjugates
Glyma.10G272400	M663T414_NEG	-0.502726	0.0334708	CYSTEINYL-TRNA SYNTHETASE // CYSTEINE-TRNA LIGASE	NAD+	Nucleosides, nucleotides, and analogues	(5'->5')-dinucleotides	NA
Glyma.10G272400	M974T533_3_POS	-0.602526	0.00813623	CYSTEINYL-TRNA SYNTHETASE // CYSTEINE-TRNA LIGASE	Sinapoyl-CoA	Lipids and lipid-like molecules	Fatty Acyls	Fatty acyl thioesters
Glyma.20G117600	M138T295_POS	-0.528265	0.0242207	CYSTEINYL-TRNA SYNTHETASE // CYSTEINE-TRNA LIGASE	4-Aminobenzoate	Benzenoids	Benzene and substituted derivatives	Benzoic acids and derivatives
Glyma.20G117600	M223T934_POS	0.638694	0.00433081	CYSTEINYL-TRNA SYNTHETASE // CYSTEINE-TRNA LIGASE	1,2-Diphenyl-2-buten-1-one	Phenylpropanoids and polyketides	Stilbenes
Glyma.20G117600	M247T932_POS	-0.62816	0.00524486	CYSTEINYL-TRNA SYNTHETASE // CYSTEINE-TRNA LIGASE	Geranylhydroquinone	Lipids and lipid-like molecules	Prenol lipids	Quinone and hydroquinone lipids
Glyma.20G117600	M279T839_POS	-0.531262	0.0232823	CYSTEINYL-TRNA SYNTHETASE // CYSTEINE-TRNA LIGASE	Di-n-butyl phthalate	Benzenoids	Benzene and substituted derivatives	Benzoic acids and derivatives
Glyma.20G117600	M287T811_POS	-0.702051	0.00116251	CYSTEINYL-TRNA SYNTHETASE // CYSTEINE-TRNA LIGASE	Retinol	Lipids and lipid-like molecules	Prenol lipids	Retinoids
Glyma.20G117600	M293T902_POS	0.523179	0.0258811	CYSTEINYL-TRNA SYNTHETASE // CYSTEINE-TRNA LIGASE	Methyl (9Z,12Z,15Z)-9,12,15-octadecatrienoate	Lipids and lipid-like molecules	Fatty Acyls	Lineolic acids and derivatives
Glyma.20G117600	M298T830_POS	-0.547871	0.0185843	CYSTEINYL-TRNA SYNTHETASE // CYSTEINE-TRNA LIGASE	N7-methylguanosine
Glyma.20G117600	M300T916_POS	-0.598734	0.00865586	CYSTEINYL-TRNA SYNTHETASE // CYSTEINE-TRNA LIGASE	D-erythro-sphingosine	Organic nitrogen compounds	Organonitrogen compounds	Amines
Glyma.20G117600	M363T922_NEG	-0.60855	0.00736243	CYSTEINYL-TRNA SYNTHETASE // CYSTEINE-TRNA LIGASE	XMP
Glyma.20G117600	M383T829_POS	-0.554991	0.0168154	CYSTEINYL-TRNA SYNTHETASE // CYSTEINE-TRNA LIGASE	Histamine-trifluoromethyltoluide	Benzenoids	Benzene and substituted derivatives	Trifluoromethylbenzenes
Glyma.20G117600	M600T447_2_POS	-0.529022	0.023981	CYSTEINYL-TRNA SYNTHETASE // CYSTEINE-TRNA LIGASE	5'''-epi-Lividomycin B	Organic oxygen compounds	Organooxygen compounds	Carbohydrates and carbohydrate conjugates
Glyma.10G141500	M142T82_POS	-0.515227	0.0286533	PROTEIN EARS-1	2-Aminomuconate semialdehyde	Organic acids and derivatives	Carboxylic acids and derivatives	Amino acids, peptides, and analogues
Glyma.10G141500	M166T709_NEG	-0.548495	0.0184236	PROTEIN EARS-1	Quinolinate	Organoheterocyclic compounds	Pyridines and derivatives	Pyridinecarboxylic acids and derivatives
Glyma.10G141500	M173T928_NEG	-0.551544	0.0176543	PROTEIN EARS-1	cis-Aconitic acid	Organic acids and derivatives	Carboxylic acids and derivatives	Tricarboxylic acids and derivatives
Glyma.10G141500	M183T520_POS	0.706268	0.00105278	PROTEIN EARS-1	Triethylphosphate	Organic acids and derivatives	Organic phosphoric acids and derivatives	Phosphate esters
Glyma.10G141500	M203T330_NEG	0.5052	0.0324711	PROTEIN EARS-1	Solsodomine A	Organoheterocyclic compounds	Pyrroles	Substituted pyrroles
Glyma.10G141500	M205T228_NEG	0.518768	0.0273917	PROTEIN EARS-1	(2S,3R)-3-Hydroxybutane-1,2,3-tricarboxylate	Organic acids and derivatives	Carboxylic acids and derivatives	Tricarboxylic acids and derivatives
Glyma.10G141500	M217T931_POS	-0.574006	0.012737	PROTEIN EARS-1	Lycoperodine 1	Organoheterocyclic compounds	Indoles and derivatives	Pyridoindoles
Glyma.10G141500	M220T282_POS	0.623879	0.00565851	PROTEIN EARS-1	Pentahomomethionine	Organic acids and derivatives	Carboxylic acids and derivatives	Amino acids, peptides, and analogues
Glyma.10G141500	M223T934_POS	0.531528	0.0232004	PROTEIN EARS-1	1,2-Diphenyl-2-buten-1-one	Phenylpropanoids and polyketides	Stilbenes
Glyma.10G141500	M247T932_POS	-0.506442	0.0319781	PROTEIN EARS-1	Geranylhydroquinone	Lipids and lipid-like molecules	Prenol lipids	Quinone and hydroquinone lipids
Glyma.10G141500	M259T824_POS	-0.627723	0.00528593	PROTEIN EARS-1	Tetradecanedioic acid	Lipids and lipid-like molecules	Fatty Acyls	Fatty acids and conjugates
Glyma.10G141500	M275T69_NEG	0.5656	0.0144294	PROTEIN EARS-1	Lactucin	Organoheterocyclic compounds	Lactones	Gamma butyrolactones
Glyma.10G141500	M279T839_POS	-0.56026	0.0155942	PROTEIN EARS-1	Di-n-butyl phthalate	Benzenoids	Benzene and substituted derivatives	Benzoic acids and derivatives
Glyma.10G141500	M293T902_POS	0.641891	0.00408077	PROTEIN EARS-1	Methyl (9Z,12Z,15Z)-9,12,15-octadecatrienoate	Lipids and lipid-like molecules	Fatty Acyls	Lineolic acids and derivatives
Glyma.10G141500	M299T206_NEG	0.551088	0.0177676	PROTEIN EARS-1	Salidroside	Organic oxygen compounds	Organooxygen compounds	Carbohydrates and carbohydrate conjugates
Glyma.10G141500	M300T916_POS	-0.625465	0.00550228	PROTEIN EARS-1	D-erythro-sphingosine	Organic nitrogen compounds	Organonitrogen compounds	Amines
Glyma.10G141500	M306T216_NEG	0.51552	0.0285471	PROTEIN EARS-1	Lividamine	Organic oxygen compounds	Organooxygen compounds	Carbohydrates and carbohydrate conjugates
Glyma.10G141500	M308T142_NEG	0.543217	0.0198177	PROTEIN EARS-1	N-Jasmonoylvaline	Organic acids and derivatives	Carboxylic acids and derivatives	Amino acids, peptides, and analogues
Glyma.10G141500	M325T449_NEG	0.562187	0.0151656	PROTEIN EARS-1	Dihydrosterigmatocystin	Phenylpropanoids and polyketides	Sterigmatocystins	NA
Glyma.10G141500	M326T442_POS	0.501589	0.033938	PROTEIN EARS-1	Farnesylcysteine	Lipids and lipid-like molecules	Prenol lipids	Sesquiterpenoids
Glyma.10G141500	M348T905_POS	0.55977	0.0157047	PROTEIN EARS-1	adenosine 2-monophosphate
Glyma.10G141500	M365T78_NEG	-0.503019	0.0333511	PROTEIN EARS-1	1-(5'-Phosphoribosyl)-5-formamido-4-imidazolecarboxamide	Nucleosides, nucleotides, and analogues	Imidazole ribonucleosides and ribonucleotides	1-ribosyl-imidazolecarboxamides
Glyma.10G141500	M371T648_POS	-0.570904	0.013342	PROTEIN EARS-1	4,4'-Bis(2-carboxyvinyl)-3,3'-dimethoxydiphenyl ether	Benzenoids	Benzene and substituted derivatives	Diphenylethers
Glyma.10G141500	M373T732_POS	0.519041	0.0272964	PROTEIN EARS-1	5,7,2',3',4'-Pentamethoxyflavone	Phenylpropanoids and polyketides	Flavonoids	O-methylated flavonoids
Glyma.10G141500	M405T811_POS	-0.54959	0.0181444	PROTEIN EARS-1	5?-CHOLANIC ACID-3?-OL-6_7-DIONE	Lipids and lipid-like molecules	Steroids and steroid derivatives	Bile acids, alcohols and derivatives
Glyma.10G141500	M482T944_NEG	-0.586047	0.0105923	PROTEIN EARS-1	C31-phthiodiolone A
Glyma.10G141500	M484T944_NEG	-0.540704	0.0205099	PROTEIN EARS-1	C31-phthiotriol
Glyma.10G141500	M600T447_2_POS	-0.500125	0.0345473	PROTEIN EARS-1	5'''-epi-Lividomycin B	Organic oxygen compounds	Organooxygen compounds	Carbohydrates and carbohydrate conjugates
Glyma.10G141500	M632T309_2_POS	0.576802	0.0122104	PROTEIN EARS-1	3,4-dihydroxy-5-all-trans-heptaprenylbenzoate
Glyma.10G141500	M682T453_NEG	0.583791	0.0109702	PROTEIN EARS-1	27-O-Demethylrifamycin SV	Phenylpropanoids and polyketides	Macrolactams	NA
Glyma.10G141500	M723T405_3_POS	0.581116	0.0114325	PROTEIN EARS-1	trypanothione
Glyma.10G141500	M793T393_2_POS	0.575996	0.0123604	PROTEIN EARS-1	Betavulgaroside II	Lipids and lipid-like molecules	Prenol lipids	Triterpenoids
Glyma.20G090100	M120T938_POS	0.540941	0.0204438	PROTEIN EARS-1	N-Carboxyglycine	Organic acids and derivatives	Carboxylic acids and derivatives	Amino acids, peptides, and analogues
Glyma.20G090100	M123T168_POS	-0.620388	0.0060151	PROTEIN EARS-1	Benzoic acid	Benzenoids	Benzene and substituted derivatives	Benzoic acids and derivatives
Glyma.20G090100	M129T909_POS	-0.503255	0.0332552	PROTEIN EARS-1	3-Octanone	Organic oxygen compounds	Organooxygen compounds	Carbonyl compounds
Glyma.20G090100	M130T73_2_POS	-0.501025	0.0341719	PROTEIN EARS-1	DL-Pipecolinic acid	Organic acids and derivatives	Carboxylic acids and derivatives	Amino acids, peptides, and analogues
Glyma.20G090100	M136T97_POS	-0.53589	0.0218888	PROTEIN EARS-1	2-Phenylacetamide	Benzenoids	Benzene and substituted derivatives	Phenylacetamides
Glyma.20G090100	M142T225_POS	0.503631	0.0331024	PROTEIN EARS-1	O-phosphoethanolamine
Glyma.20G090100	M143T615_POS	-0.553877	0.017083	PROTEIN EARS-1	Nonadienal	Organic oxygen compounds	Organooxygen compounds	Carbonyl compounds
Glyma.20G090100	M148T929_NEG	-0.631231	0.00496356	PROTEIN EARS-1	Benzyl isothiocyanate	Benzenoids	Benzene and substituted derivatives
Glyma.20G090100	M166T709_NEG	-0.54199	0.0201531	PROTEIN EARS-1	Quinolinate	Organoheterocyclic compounds	Pyridines and derivatives	Pyridinecarboxylic acids and derivatives
Glyma.20G090100	M167T929_NEG	-0.603391	0.00802119	PROTEIN EARS-1	Butanoylphosphate	Organic acids and derivatives	Organic phosphoric acids and derivatives	Phosphate esters
Glyma.20G090100	M173T928_NEG	-0.672729	0.0022192	PROTEIN EARS-1	cis-Aconitic acid	Organic acids and derivatives	Carboxylic acids and derivatives	Tricarboxylic acids and derivatives
Glyma.20G090100	M183T520_POS	0.745836	0.000379974	PROTEIN EARS-1	Triethylphosphate	Organic acids and derivatives	Organic phosphoric acids and derivatives	Phosphate esters
Glyma.20G090100	M183T78_POS	-0.57162	0.0132004	PROTEIN EARS-1	2-Oxo-4-phosphonobutanoate	Organic acids and derivatives	Keto acids and derivatives	Short-chain keto acids and derivatives
Glyma.20G090100	M193T430_POS	-0.677974	0.0019871	PROTEIN EARS-1	Coumaryl acetate	Benzenoids	Benzene and substituted derivatives	Styrenes
Glyma.20G090100	M196T929_NEG	-0.528518	0.0241403	PROTEIN EARS-1	3-Hydroxy-2-methylpyridine-4,5-dicarboxylate	Organoheterocyclic compounds	Pyridines and derivatives	Pyridinecarboxylic acids and derivatives
Glyma.20G090100	M199T909_POS	-0.517927	0.0276874	PROTEIN EARS-1	Citronellyl acetate	Lipids and lipid-like molecules	Fatty Acyls	Fatty alcohol esters
Glyma.20G090100	M205T228_NEG	0.639128	0.00429618	PROTEIN EARS-1	(2S,3R)-3-Hydroxybutane-1,2,3-tricarboxylate	Organic acids and derivatives	Carboxylic acids and derivatives	Tricarboxylic acids and derivatives
Glyma.20G090100	M217T931_POS	-0.530405	0.0235475	PROTEIN EARS-1	Lycoperodine 1	Organoheterocyclic compounds	Indoles and derivatives	Pyridoindoles
Glyma.20G090100	M220T282_POS	0.61181	0.00696931	PROTEIN EARS-1	Pentahomomethionine	Organic acids and derivatives	Carboxylic acids and derivatives	Amino acids, peptides, and analogues
Glyma.20G090100	M225T351_POS	-0.621783	0.00587052	PROTEIN EARS-1	Methyl jasmonate	Lipids and lipid-like molecules	Fatty Acyls	Lineolic acids and derivatives
Glyma.20G090100	M237T431_POS	-0.505071	0.0325225	PROTEIN EARS-1	Capsidiol	Lipids and lipid-like molecules	Prenol lipids	Sesquiterpenoids
Glyma.20G090100	M243T798_NEG	0.581164	0.011424	PROTEIN EARS-1	beta-Hydroxymyristic acid	Lipids and lipid-like molecules	Fatty Acyls	Fatty acids and conjugates
Glyma.20G090100	M247T932_POS	-0.550285	0.0179687	PROTEIN EARS-1	Geranylhydroquinone	Lipids and lipid-like molecules	Prenol lipids	Quinone and hydroquinone lipids
Glyma.20G090100	M257T69_2_POS	-0.516639	0.0281451	PROTEIN EARS-1	Isoliquiritigenin	Phenylpropanoids and polyketides	Linear 1,3-diarylpropanoids	Chalcones and dihydrochalcones
Glyma.20G090100	M259T824_POS	-0.541842	0.0201941	PROTEIN EARS-1	Tetradecanedioic acid	Lipids and lipid-like molecules	Fatty Acyls	Fatty acids and conjugates
Glyma.20G090100	M275T704_2_POS	-0.53551	0.0220007	PROTEIN EARS-1	apiforol
Glyma.20G090100	M279T839_POS	-0.54172	0.0202277	PROTEIN EARS-1	Di-n-butyl phthalate	Benzenoids	Benzene and substituted derivatives	Benzoic acids and derivatives
Glyma.20G090100	M293T902_POS	0.605089	0.00779936	PROTEIN EARS-1	Methyl (9Z,12Z,15Z)-9,12,15-octadecatrienoate	Lipids and lipid-like molecules	Fatty Acyls	Lineolic acids and derivatives
Glyma.20G090100	M300T916_POS	-0.62104	0.00594717	PROTEIN EARS-1	D-erythro-sphingosine	Organic nitrogen compounds	Organonitrogen compounds	Amines
Glyma.20G090100	M301T457_NEG	-0.500447	0.0344125	PROTEIN EARS-1	Quercetin	Phenylpropanoids and polyketides	Flavonoids	Flavones
Glyma.20G090100	M306T216_NEG	0.50915	0.0309229	PROTEIN EARS-1	Lividamine	Organic oxygen compounds	Organooxygen compounds	Carbohydrates and carbohydrate conjugates
Glyma.20G090100	M319T453_POS	-0.507087	0.0317241	PROTEIN EARS-1	[3aR-(3aalpha,4alpha,9aalpha,9bbeta)]-4-(Acetyloxy)-3,3a,4,5,9a,9b-hexahydro-9-(hydroxymethyl)-6-methyl-3-methylene-azuleno[4,5-b]furan-2,7-dione	Organoheterocyclic compounds	Lactones	Gamma butyrolactones
Glyma.20G090100	M353T150_POS	-0.550359	0.0179501	PROTEIN EARS-1	Arbutin 6-phosphate	Organic oxygen compounds	Organooxygen compounds	Carbohydrates and carbohydrate conjugates
Glyma.20G090100	M353T649_1_POS	-0.656061	0.00310995	PROTEIN EARS-1	Citrusinol	Phenylpropanoids and polyketides	Flavonoids	Pyranoflavonoids
Glyma.20G090100	M355T451_NEG	-0.54134	0.0203328	PROTEIN EARS-1	Gentiopicrin	Organic oxygen compounds	Organooxygen compounds	Carbohydrates and carbohydrate conjugates
Glyma.20G090100	M356T767_POS	-0.526847	0.0246751	PROTEIN EARS-1	Arachidoyl Ethanolamide	Organic nitrogen compounds	Organonitrogen compounds	Amines
Glyma.20G090100	M357T481_POS	-0.52371	0.0257038	PROTEIN EARS-1	Norsolorinic acid anthrone	Benzenoids	Anthracenes	NA
Glyma.20G090100	M371T648_POS	-0.627644	0.00529337	PROTEIN EARS-1	4,4'-Bis(2-carboxyvinyl)-3,3'-dimethoxydiphenyl ether	Benzenoids	Benzene and substituted derivatives	Diphenylethers
Glyma.20G090100	M373T732_POS	0.749617	0.00034149	PROTEIN EARS-1	5,7,2',3',4'-Pentamethoxyflavone	Phenylpropanoids and polyketides	Flavonoids	O-methylated flavonoids
Glyma.20G090100	M375T511_POS	-0.649355	0.00354259	PROTEIN EARS-1	Deoxyloganin	Lipids and lipid-like molecules	Prenol lipids	Terpene glycosides
Glyma.20G090100	M377T346_POS	-0.504233	0.0328592	PROTEIN EARS-1	Riboflavin	Organoheterocyclic compounds	Pteridines and derivatives	Alloxazines and isoalloxazines
Glyma.20G090100	M384T434_POS	-0.554901	0.0168368	PROTEIN EARS-1	Tolfenpyrad	Benzenoids	Benzene and substituted derivatives	Diphenylethers
Glyma.20G090100	M400T186_POS	-0.570251	0.0134722	PROTEIN EARS-1	Colchicine	Hydrocarbon derivatives	Tropones	NA
Glyma.20G090100	M405T811_POS	-0.519568	0.0271128	PROTEIN EARS-1	5?-CHOLANIC ACID-3?-OL-6_7-DIONE	Lipids and lipid-like molecules	Steroids and steroid derivatives	Bile acids, alcohols and derivatives
Glyma.20G090100	M427T380_NEG	-0.587233	0.0103977	PROTEIN EARS-1	(13S,14R)-1-Hydroxy-13-O-acetyl-N-methylcanadine	Alkaloids and derivatives	Protoberberine alkaloids and derivatives	NA
Glyma.20G090100	M429T236_POS	0.515075	0.0287084	PROTEIN EARS-1	IDP
Glyma.20G090100	M459T515_POS	-0.572051	0.0131157	PROTEIN EARS-1	Gallocatechin 3-O-gallate	Phenylpropanoids and polyketides	Flavonoids	Flavans
Glyma.20G090100	M482T944_NEG	-0.641116	0.0041403	PROTEIN EARS-1	C31-phthiodiolone A
Glyma.20G090100	M484T944_NEG	-0.594618	0.00924991	PROTEIN EARS-1	C31-phthiotriol
Glyma.20G090100	M497T753_POS	-0.533918	0.0224743	PROTEIN EARS-1	Polypodine B	Lipids and lipid-like molecules	Steroids and steroid derivatives	Bile acids, alcohols and derivatives
Glyma.20G090100	M511T438_POS	-0.723449	0.000690498	PROTEIN EARS-1	6',7'-Dihydroxybergamottin decanal acetal	Phenylpropanoids and polyketides	Coumarins and derivatives	Furanocoumarins
Glyma.20G090100	M515T649_POS	-0.620708	0.00598169	PROTEIN EARS-1	2'',6''-O-Diacetyloninin	Phenylpropanoids and polyketides	Isoflavonoids	Isoflavonoid O-glycosides
Glyma.20G090100	M521T341_POS	-0.507995	0.0313694	PROTEIN EARS-1	Ichanexic acid	Lipids and lipid-like molecules	Prenol lipids	Terpene lactones
Glyma.20G090100	M534T491_POS	-0.648047	0.00363239	PROTEIN EARS-1	CDP-abequose	Nucleosides, nucleotides, and analogues	Pyrimidine nucleotides	Pyrimidine nucleotide sugars
Glyma.20G090100	M545T512_POS	-0.554434	0.0169488	PROTEIN EARS-1	10-Deacetylbaccatin III	Lipids and lipid-like molecules	Prenol lipids	Diterpenoids
Glyma.20G090100	M632T309_2_POS	0.527723	0.0243937	PROTEIN EARS-1	3,4-dihydroxy-5-all-trans-heptaprenylbenzoate
Glyma.20G090100	M637T693_POS	-0.622471	0.00580026	PROTEIN EARS-1	Lanceolitol B7	Organic oxygen compounds	Organooxygen compounds	Carbohydrates and carbohydrate conjugates
Glyma.20G090100	M667T430_POS	-0.554156	0.0170156	PROTEIN EARS-1	Bifurcose	Organic oxygen compounds	Organooxygen compounds	Carbohydrates and carbohydrate conjugates
Glyma.20G090100	M682T453_NEG	0.565158	0.0145231	PROTEIN EARS-1	27-O-Demethylrifamycin SV	Phenylpropanoids and polyketides	Macrolactams	NA
Glyma.20G090100	M723T405_3_POS	0.564679	0.0146252	PROTEIN EARS-1	trypanothione
Glyma.20G090100	M74T704_POS	-0.507499	0.031563	PROTEIN EARS-1	3-Aminopropanal	Organic oxygen compounds	Organooxygen compounds	Carbonyl compounds
Glyma.20G090100	M891T716_NEG	-0.548268	0.0184819	PROTEIN EARS-1	Soyasaponin gammaa	Lipids and lipid-like molecules	Prenol lipids	Terpene glycosides
Glyma.20G090100	M908T548_POS	0.510116	0.030553	PROTEIN EARS-1	Chlorophyll b
Glyma.20G090100	M949T697_NEG	0.520539	0.0267772	PROTEIN EARS-1	Zn-Bacteriochlorophyll a
Glyma.03G097900	M1046T649_NEG	-0.542013	0.020147	glutamyl-tRNA synthetase (EARS, gltX)	Solanigroside H	Lipids and lipid-like molecules	Steroids and steroid derivatives	Steroidal glycosides
Glyma.03G097900	M105T714_POS	-0.5204	0.0268251	glutamyl-tRNA synthetase (EARS, gltX)	Styrene	Benzenoids	Benzene and substituted derivatives	Styrenes
Glyma.03G097900	M111T68_NEG	-0.593196	0.00946272	glutamyl-tRNA synthetase (EARS, gltX)	Hydroxymethylphosphonate	Organic acids and derivatives	Organic phosphonic acids and derivatives	Organic phosphonic acids
Glyma.03G097900	M138T295_POS	-0.651384	0.00340674	glutamyl-tRNA synthetase (EARS, gltX)	4-Aminobenzoate	Benzenoids	Benzene and substituted derivatives	Benzoic acids and derivatives
Glyma.03G097900	M151T762_POS	-0.532142	0.0230121	glutamyl-tRNA synthetase (EARS, gltX)	Thymol	Lipids and lipid-like molecules	Prenol lipids	Monoterpenoids
Glyma.03G097900	M168T96_POS	-0.54486	0.019375	glutamyl-tRNA synthetase (EARS, gltX)	Pyridoxal hydrochrolide	Organoheterocyclic compounds	Pyridines and derivatives	Pyridine carboxaldehydes
Glyma.03G097900	M169T761_POS	-0.597759	0.00879371	glutamyl-tRNA synthetase (EARS, gltX)	6-Hydroxy-2,6-dimethyl-2,7-octadien-4-one	Lipids and lipid-like molecules	Prenol lipids	Monoterpenoids
Glyma.03G097900	M191T595_POS	-0.553556	0.0171608	glutamyl-tRNA synthetase (EARS, gltX)	beta-Damascenone	Organic oxygen compounds	Organooxygen compounds	Carbonyl compounds
Glyma.03G097900	M193T806_POS	-0.543148	0.0198364	glutamyl-tRNA synthetase (EARS, gltX)	Vitispirane	Organoheterocyclic compounds	Tetrahydrofurans
Glyma.03G097900	M199T446_POS	-0.532153	0.0230088	glutamyl-tRNA synthetase (EARS, gltX)	Hercynine	Organic acids and derivatives	Carboxylic acids and derivatives	Amino acids, peptides, and analogues
Glyma.03G097900	M209T604_POS	-0.543446	0.0197555	glutamyl-tRNA synthetase (EARS, gltX)	alpha-Asarone	Benzenoids	Phenol ethers	Anisoles
Glyma.03G097900	M223T934_POS	0.555905	0.0165982	glutamyl-tRNA synthetase (EARS, gltX)	1,2-Diphenyl-2-buten-1-one	Phenylpropanoids and polyketides	Stilbenes
Glyma.03G097900	M247T932_POS	-0.586991	0.0104372	glutamyl-tRNA synthetase (EARS, gltX)	Geranylhydroquinone	Lipids and lipid-like molecules	Prenol lipids	Quinone and hydroquinone lipids
Glyma.03G097900	M252T98_POS	-0.64082	0.00416315	glutamyl-tRNA synthetase (EARS, gltX)	Deoxyadenosine	Nucleosides, nucleotides, and analogues	Purine nucleosides	Purine 2'-deoxyribonucleosides
Glyma.03G097900	M258T660_POS	-0.520775	0.026696	glutamyl-tRNA synthetase (EARS, gltX)	Norcraugsodine	Benzenoids	Phenols	Benzenediols
Glyma.03G097900	M273T639_POS	-0.530355	0.0235631	glutamyl-tRNA synthetase (EARS, gltX)	Naringenin chalcone	Phenylpropanoids and polyketides	Linear 1,3-diarylpropanoids	Chalcones and dihydrochalcones
Glyma.03G097900	M277T796_POS	-0.54926	0.0182281	glutamyl-tRNA synthetase (EARS, gltX)	Dehydrocrepenynic acid	Lipids and lipid-like molecules	Fatty Acyls	Fatty acids and conjugates
Glyma.03G097900	M279T781_POS	-0.504535	0.0327376	glutamyl-tRNA synthetase (EARS, gltX)	?-linolenic acid	Lipids and lipid-like molecules	Fatty Acyls	Lineolic acids and derivatives
Glyma.03G097900	M287T811_POS	-0.653272	0.00328432	glutamyl-tRNA synthetase (EARS, gltX)	Retinol	Lipids and lipid-like molecules	Prenol lipids	Retinoids
Glyma.03G097900	M291T743_POS	-0.573745	0.012787	glutamyl-tRNA synthetase (EARS, gltX)	Deoxy phytoprostane J1	Lipids and lipid-like molecules	Fatty Acyls	Eicosanoids
Glyma.03G097900	M295T796_POS	-0.559159	0.0158434	glutamyl-tRNA synthetase (EARS, gltX)	Colneleic acid	Lipids and lipid-like molecules	Fatty Acyls	Fatty acids and conjugates
Glyma.03G097900	M305T814_POS	-0.599832	0.00850273	glutamyl-tRNA synthetase (EARS, gltX)	3-Acetoxy-9-heptadecene-4,6-diyn-8-ol.	Lipids and lipid-like molecules	Fatty Acyls	Fatty alcohol esters
Glyma.03G097900	M321T870_POS	-0.585088	0.0107516	glutamyl-tRNA synthetase (EARS, gltX)	Anomallotusin
Glyma.03G097900	M329T783_POS	-0.538509	0.0211299	glutamyl-tRNA synthetase (EARS, gltX)	(4Z,7Z,10Z,13Z,16Z,19Z)-Docosahexaenoic acid	Lipids and lipid-like molecules	Fatty Acyls	Fatty acids and conjugates
Glyma.03G097900	M338T700_POS	-0.528111	0.0242699	glutamyl-tRNA synthetase (EARS, gltX)	5-Hydroxymethyldeoxycytidylate	Nucleosides, nucleotides, and analogues	Pyrimidine nucleotides	Pyrimidine deoxyribonucleotides
Glyma.03G097900	M345T861_POS	-0.561868	0.0152359	glutamyl-tRNA synthetase (EARS, gltX)	SB 205607	Organoheterocyclic compounds	Quinolines and derivatives	Phenylquinolines
Glyma.03G097900	M347T786_POS	-0.67807	0.00198302	glutamyl-tRNA synthetase (EARS, gltX)	Corticosterone	Lipids and lipid-like molecules	Steroids and steroid derivatives	Hydroxysteroids
Glyma.03G097900	M350T742_POS	-0.543333	0.019786	glutamyl-tRNA synthetase (EARS, gltX)	1-(2-carboxyphenylamino)-1-deoxy-D-ribulose 5-phosphate
Glyma.03G097900	M363T922_NEG	-0.603093	0.00806069	glutamyl-tRNA synthetase (EARS, gltX)	XMP
Glyma.03G097900	M377T346_POS	-0.550331	0.0179573	glutamyl-tRNA synthetase (EARS, gltX)	Riboflavin	Organoheterocyclic compounds	Pteridines and derivatives	Alloxazines and isoalloxazines
Glyma.03G097900	M391T699_NEG	-0.507265	0.0316543	glutamyl-tRNA synthetase (EARS, gltX)	5-O-Demethylnobiletin
Glyma.03G097900	M426T439_NEG	-0.515924	0.0284015	glutamyl-tRNA synthetase (EARS, gltX)	ADP group
Glyma.03G097900	M439T710_POS	-0.524884	0.0253149	glutamyl-tRNA synthetase (EARS, gltX)	Demethylphylloquinol	Lipids and lipid-like molecules	Prenol lipids	Diterpenoids
Glyma.03G097900	M457T870_POS	-0.570306	0.0134612	glutamyl-tRNA synthetase (EARS, gltX)	Oleanolic acid	Lipids and lipid-like molecules	Prenol lipids	Triterpenoids
Glyma.03G097900	M793T393_2_POS	0.553231	0.0172396	glutamyl-tRNA synthetase (EARS, gltX)	Betavulgaroside II	Lipids and lipid-like molecules	Prenol lipids	Triterpenoids
Glyma.06G203400	M1002T341_3_POS	-0.616493	0.00643427	glutaminyl-tRNA synthetase (QARS, glnS)	3-Oxo-OPC4-CoA	Lipids and lipid-like molecules	Fatty Acyls	Fatty acyl thioesters
Glyma.06G203400	M102T936_POS	0.502873	0.033411	glutaminyl-tRNA synthetase (QARS, glnS)	Isopropyl isothiocyanate	Organosulfur compounds	Isothiocyanates
Glyma.06G203400	M1036T687_1_NEG	-0.544092	0.019581	glutaminyl-tRNA synthetase (QARS, glnS)	Abutiloside D	Lipids and lipid-like molecules	Steroids and steroid derivatives	Steroidal glycosides
Glyma.06G203400	M1038T707_NEG	0.552796	0.0173459	glutaminyl-tRNA synthetase (QARS, glnS)	Soyasaponin betaa
Glyma.06G203400	M105T549_POS	-0.558546	0.0159835	glutaminyl-tRNA synthetase (QARS, glnS)	Urea-1-carboxylate	Organic acids and derivatives	Organic carbonic acids and derivatives	Ureas
Glyma.06G203400	M110T63_NEG	0.558198	0.0160634	glutaminyl-tRNA synthetase (QARS, glnS)	Histamine	Organic nitrogen compounds	Organonitrogen compounds	Amines
Glyma.06G203400	M112T69_POS	0.520523	0.0267826	glutaminyl-tRNA synthetase (QARS, glnS)	Cytosine	Organoheterocyclic compounds	Diazines	Pyrimidines and pyrimidine derivatives
Glyma.06G203400	M115T139_NEG	0.560765	0.0154809	glutaminyl-tRNA synthetase (QARS, glnS)	Levulinic acid	Organic acids and derivatives	Carboxylic acids and derivatives	Carboxylic acid derivatives
Glyma.06G203400	M119T429_NEG	0.68443	0.00172925	glutaminyl-tRNA synthetase (QARS, glnS)	4-Vinylphenol	Benzenoids	Benzene and substituted derivatives	Styrenes
Glyma.06G203400	M120T123_NEG	0.525564	0.0250918	glutaminyl-tRNA synthetase (QARS, glnS)	D-Cysteine	Organic acids and derivatives	Carboxylic acids and derivatives	Amino acids, peptides, and analogues
Glyma.06G203400	M120T430_NEG	0.753173	0.00030833	glutaminyl-tRNA synthetase (QARS, glnS)	n-Phenylformamide	Benzenoids	Benzene and substituted derivatives	Anilides
Glyma.06G203400	M121T471_NEG	0.583859	0.0109587	glutaminyl-tRNA synthetase (QARS, glnS)	4-hydroxybenzaldehyde	Organic oxygen compounds	Organooxygen compounds	Carbonyl compounds
Glyma.06G203400	M123T63_POS	0.563158	0.0149532	glutaminyl-tRNA synthetase (QARS, glnS)	Polysulfide
Glyma.06G203400	M127T62_POS	-0.597295	0.00886006	glutaminyl-tRNA synthetase (QARS, glnS)	thymine
Glyma.06G203400	M129T285_NEG	0.560529	0.0155337	glutaminyl-tRNA synthetase (QARS, glnS)	3-methyl-2-oxovaleric acid	Organic acids and derivatives	Keto acids and derivatives	Short-chain keto acids and derivatives
Glyma.06G203400	M129T329_1_NEG	0.572585	0.0130114	glutaminyl-tRNA synthetase (QARS, glnS)	4-Methyl-2-oxopentanoic acid	Organic acids and derivatives	Keto acids and derivatives	Short-chain keto acids and derivatives
Glyma.06G203400	M129T61_POS	-0.672203	0.00224367	glutaminyl-tRNA synthetase (QARS, glnS)	5,6-dihydrothymine
Glyma.06G203400	M129T73_NEG	0.567379	0.0140572	glutaminyl-tRNA synthetase (QARS, glnS)	Mesaconic acid	Lipids and lipid-like molecules	Fatty Acyls	Fatty acids and conjugates
Glyma.06G203400	M130T329_NEG	0.51913	0.0272651	glutaminyl-tRNA synthetase (QARS, glnS)	Creatine	Organic acids and derivatives	Carboxylic acids and derivatives	Amino acids, peptides, and analogues
Glyma.06G203400	M131T62_POS	-0.595118	0.0091761	glutaminyl-tRNA synthetase (QARS, glnS)	Agmatine	Organic nitrogen compounds	Organonitrogen compounds	Guanidines
Glyma.06G203400	M134T201_POS	0.536404	0.0217381	glutaminyl-tRNA synthetase (QARS, glnS)	4-Methylthiobutanaldoxime	Organic nitrogen compounds	Organonitrogen compounds	Oximes
Glyma.06G203400	M136T433_NEG	0.545646	0.0191662	glutaminyl-tRNA synthetase (QARS, glnS)	Anthranilic acid	Benzenoids	Benzene and substituted derivatives	Benzoic acids and derivatives
Glyma.06G203400	M137T309_NEG	0.545696	0.019153	glutaminyl-tRNA synthetase (QARS, glnS)	2-(4-Hydroxyphenyl)ethanol	Benzenoids	Phenols	Tyrosols and derivatives
Glyma.06G203400	M137T479_POS	-0.517558	0.027818	glutaminyl-tRNA synthetase (QARS, glnS)	2-Hydroxyacetophenone	Organic oxygen compounds	Organooxygen compounds	Carbonyl compounds
Glyma.06G203400	M137T530_NEG	0.635827	0.00456562	glutaminyl-tRNA synthetase (QARS, glnS)	4-Hydroxybenzoate	Benzenoids	Benzene and substituted derivatives	Benzoic acids and derivatives
Glyma.06G203400	M141T614_POS	0.610663	0.0071056	glutaminyl-tRNA synthetase (QARS, glnS)	(2E,6Z)-Nona-2,6-dien-1-ol	Lipids and lipid-like molecules	Fatty Acyls	Fatty alcohols
Glyma.06G203400	M141T928_NEG	0.561357	0.0153491	glutaminyl-tRNA synthetase (QARS, glnS)	5-Hydroxymaltol	Organoheterocyclic compounds	Pyrans	Pyranones and derivatives
Glyma.06G203400	M144T110_NEG	0.548032	0.0185427	glutaminyl-tRNA synthetase (QARS, glnS)	4-Acetamidobutanoate	Organic acids and derivatives	Carboxylic acids and derivatives	Amino acids, peptides, and analogues
Glyma.06G203400	M145T111_NEG	0.568139	0.0139004	glutaminyl-tRNA synthetase (QARS, glnS)	4-Hydroxyquinazoline	Organoheterocyclic compounds	Diazanaphthalenes	Benzodiazines
Glyma.06G203400	M145T606_NEG	0.531022	0.0233563	glutaminyl-tRNA synthetase (QARS, glnS)	(Z)-3-Ureidoacrylate peracid	Organic acids and derivatives	Carboxylic acids and derivatives	Peroxycarboxylic acids and derivatives
Glyma.06G203400	M146T101_POS	0.544029	0.0195979	glutaminyl-tRNA synthetase (QARS, glnS)	Isoquinolone	Organoheterocyclic compounds	Isoquinolines and derivatives	Isoquinolones and derivatives
Glyma.06G203400	M146T62_POS	0.575997	0.0123602	glutaminyl-tRNA synthetase (QARS, glnS)	Spermidine	Organic nitrogen compounds	Organonitrogen compounds	Amines
Glyma.06G203400	M147T115_2_NEG	-0.52869	0.0240861	glutaminyl-tRNA synthetase (QARS, glnS)	Mevalonic acid	Lipids and lipid-like molecules	Fatty Acyls	Fatty acids and conjugates
Glyma.06G203400	M147T190_POS	-0.561605	0.015294	glutaminyl-tRNA synthetase (QARS, glnS)	Coumarin	Phenylpropanoids and polyketides	Coumarins and derivatives
Glyma.06G203400	M147T99_NEG	0.587333	0.0103814	glutaminyl-tRNA synthetase (QARS, glnS)	(-)-Citramalic acid	Lipids and lipid-like molecules	Fatty Acyls	Fatty acids and conjugates
Glyma.06G203400	M149T71_2_NEG	-0.52468	0.0253823	glutaminyl-tRNA synthetase (QARS, glnS)	Lyxose	Organic oxygen compounds	Organooxygen compounds	Carbohydrates and carbohydrate conjugates
Glyma.06G203400	M150T71_NEG	-0.512654	0.029598	glutaminyl-tRNA synthetase (QARS, glnS)	Guanine	Organoheterocyclic compounds	Imidazopyrimidines	Purines and purine derivatives
Glyma.06G203400	M150T74_POS	0.571053	0.0133124	glutaminyl-tRNA synthetase (QARS, glnS)	Methionine	Organic acids and derivatives	Carboxylic acids and derivatives	Amino acids, peptides, and analogues
Glyma.06G203400	M151T71_NEG	-0.519194	0.0272428	glutaminyl-tRNA synthetase (QARS, glnS)	N1-Methyl-2-pyridone-5-carboxamide	Organoheterocyclic compounds	Pyridines and derivatives	Pyridinecarboxylic acids and derivatives
Glyma.06G203400	M154T63_NEG	0.54255	0.0199995	glutaminyl-tRNA synthetase (QARS, glnS)	Histidine	Organic acids and derivatives	Carboxylic acids and derivatives	Amino acids, peptides, and analogues
Glyma.06G203400	M155T63_NEG	0.537485	0.0214241	glutaminyl-tRNA synthetase (QARS, glnS)	Indole-3-acetonitrile	Organoheterocyclic compounds	Indoles and derivatives	Indoles
Glyma.06G203400	M156T63_POS	0.5504	0.0179399	glutaminyl-tRNA synthetase (QARS, glnS)	L-Histidine	Organic acids and derivatives	Carboxylic acids and derivatives	Amino acids, peptides, and analogues
Glyma.06G203400	M157T63_POS	0.547042	0.0187993	glutaminyl-tRNA synthetase (QARS, glnS)	3-Indoleacetonitrile	Organoheterocyclic compounds	Indoles and derivatives	Indoles
Glyma.06G203400	M159T614_POS	0.535712	0.0219413	glutaminyl-tRNA synthetase (QARS, glnS)	Methyl caprylate	Lipids and lipid-like molecules	Fatty Acyls	Fatty acid esters
Glyma.06G203400	M159T68_POS	0.549961	0.0180505	glutaminyl-tRNA synthetase (QARS, glnS)	4-Methylene-L-glutamine	Organic acids and derivatives	Carboxylic acids and derivatives	Amino acids, peptides, and analogues
Glyma.06G203400	M162T479_POS	-0.514237	0.029014	glutaminyl-tRNA synthetase (QARS, glnS)	2,8-Quinolinediol	Organoheterocyclic compounds	Quinolines and derivatives	Quinolones and derivatives
Glyma.06G203400	M163T430_NEG	0.623964	0.00565009	glutaminyl-tRNA synthetase (QARS, glnS)	trans-4-Coumaric acid	Phenylpropanoids and polyketides	Cinnamic acids and derivatives	Hydroxycinnamic acids and derivatives
Glyma.06G203400	M163T94_NEG	-0.601424	0.00828453	glutaminyl-tRNA synthetase (QARS, glnS)	Fucose	Organic oxygen compounds	Organooxygen compounds	Carbohydrates and carbohydrate conjugates
Glyma.06G203400	M164T415_NEG	-0.524399	0.0254749	glutaminyl-tRNA synthetase (QARS, glnS)	Phenylalanine	Organic acids and derivatives	Carboxylic acids and derivatives	Amino acids, peptides, and analogues
Glyma.06G203400	M164T430_NEG	0.655637	0.00313594	glutaminyl-tRNA synthetase (QARS, glnS)	L-Methionine S-oxide	Organic acids and derivatives	Carboxylic acids and derivatives	Amino acids, peptides, and analogues
Glyma.06G203400	M164T94_NEG	-0.616809	0.00639948	glutaminyl-tRNA synthetase (QARS, glnS)	2-Amino-1,7-dihydro-1-methyl-6H-purin-6-one	Organoheterocyclic compounds	Imidazopyrimidines	Purines and purine derivatives
Glyma.06G203400	M165T216_POS	-0.706472	0.00104772	glutaminyl-tRNA synthetase (QARS, glnS)	4-Coumarate	Phenylpropanoids and polyketides	Cinnamic acids and derivatives	Hydroxycinnamic acids and derivatives
Glyma.06G203400	M165T337_NEG	0.518421	0.0275135	glutaminyl-tRNA synthetase (QARS, glnS)	Phthalic acid	Benzenoids	Benzene and substituted derivatives	Benzoic acids and derivatives
Glyma.06G203400	M165T389_POS	-0.571417	0.0132403	glutaminyl-tRNA synthetase (QARS, glnS)	p-Coumaric acid	Phenylpropanoids and polyketides	Cinnamic acids and derivatives	Hydroxycinnamic acids and derivatives
Glyma.06G203400	M165T68_NEG	-0.595894	0.00906243	glutaminyl-tRNA synthetase (QARS, glnS)	Ribonic acid	Organic oxygen compounds	Organooxygen compounds	Carbohydrates and carbohydrate conjugates
Glyma.06G203400	M166T336_NEG	0.517842	0.0277175	glutaminyl-tRNA synthetase (QARS, glnS)	2-Acetamidoethylphosphonate	Organic acids and derivatives	Organic phosphonic acids and derivatives	Organic phosphonic acids
Glyma.06G203400	M166T519_POS	0.552401	0.0174426	glutaminyl-tRNA synthetase (QARS, glnS)	D-Phenylalanine	Organic acids and derivatives	Carboxylic acids and derivatives	Amino acids, peptides, and analogues
Glyma.06G203400	M166T68_NEG	-0.602066	0.00819781	glutaminyl-tRNA synthetase (QARS, glnS)	Pyridoxal	Organoheterocyclic compounds	Pyridines and derivatives	Pyridine carboxaldehydes
Glyma.06G203400	M167T281_NEG	-0.598627	0.00867097	glutaminyl-tRNA synthetase (QARS, glnS)	Vanillic acid	Benzenoids	Benzene and substituted derivatives	Benzoic acids and derivatives
Glyma.06G203400	M168T217_NEG	0.567198	0.0140947	glutaminyl-tRNA synthetase (QARS, glnS)	Phosphodimethylethanolamine	Organic acids and derivatives	Organic phosphoric acids and derivatives	Phosphate esters
Glyma.06G203400	M169T641_POS	0.555916	0.0165956	glutaminyl-tRNA synthetase (QARS, glnS)	Homogentisate	Benzenoids	Benzene and substituted derivatives	Phenylacetic acids
Glyma.06G203400	M170T1011_POS	0.623418	0.00570458	glutaminyl-tRNA synthetase (QARS, glnS)	L-Selenocysteine	Organic acids and derivatives	Carboxylic acids and derivatives	Amino acids, peptides, and analogues
Glyma.06G203400	M172T69_NEG	-0.530727	0.0234477	glutaminyl-tRNA synthetase (QARS, glnS)	(2S,5S)-trans-Carboxymethylproline	Organic acids and derivatives	Carboxylic acids and derivatives	Amino acids, peptides, and analogues
Glyma.06G203400	M174T76_NEG	0.559479	0.0157705	glutaminyl-tRNA synthetase (QARS, glnS)	Monodehydroascorbate	Organoheterocyclic compounds	Dihydrofurans	Furanones
Glyma.06G203400	M175T287_2_NEG	0.560734	0.0154878	glutaminyl-tRNA synthetase (QARS, glnS)	2-Isopropylmalic acid	Lipids and lipid-like molecules	Fatty Acyls	Fatty acids and conjugates
Glyma.06G203400	M175T63_POS	0.576236	0.0123157	glutaminyl-tRNA synthetase (QARS, glnS)	Arginine	Organic acids and derivatives	Carboxylic acids and derivatives	Amino acids, peptides, and analogues
Glyma.06G203400	M176T287_NEG	0.560185	0.015611	glutaminyl-tRNA synthetase (QARS, glnS)	1-Methoxy-1H-indole-3-methanol	Organoheterocyclic compounds	Indoles and derivatives	Indoles
Glyma.06G203400	M176T526_POS	0.511403	0.0300659	glutaminyl-tRNA synthetase (QARS, glnS)	Indole-3-acetic acid	Organoheterocyclic compounds	Indoles and derivatives	Indolyl carboxylic acids and derivatives
Glyma.06G203400	M181T415_POS	0.549222	0.0182378	glutaminyl-tRNA synthetase (QARS, glnS)	4-Hydroxyphenylpyruvic acid	Benzenoids	Benzene and substituted derivatives	Phenylpyruvic acid derivatives
Glyma.06G203400	M182T307_NEG	0.519466	0.0271482	glutaminyl-tRNA synthetase (QARS, glnS)	4-Pyridoxate	Organoheterocyclic compounds	Pyridines and derivatives	Pyridinecarboxylic acids and derivatives
Glyma.06G203400	M187T1029_POS	0.543021	0.0198709	glutaminyl-tRNA synthetase (QARS, glnS)	iodoacetate
Glyma.06G203400	M188T74_POS	-0.553725	0.0171196	glutaminyl-tRNA synthetase (QARS, glnS)	6-Acetamido-2-oxohexanoate	Organic acids and derivatives	Keto acids and derivatives	Medium-chain keto acids and derivatives
Glyma.06G203400	M188T99_NEG	0.620461	0.00600752	glutaminyl-tRNA synthetase (QARS, glnS)	AminoDHQ	Organic acids and derivatives	Carboxylic acids and derivatives	Amino acids, peptides, and analogues
Glyma.06G203400	M189T160_POS	0.566757	0.0141864	glutaminyl-tRNA synthetase (QARS, glnS)	Gly-Leu	Organic acids and derivatives	Carboxylic acids and derivatives	Amino acids, peptides, and analogues
Glyma.06G203400	M189T550_NEG	-0.581757	0.0113204	glutaminyl-tRNA synthetase (QARS, glnS)	N-Methylserotonin	Organoheterocyclic compounds	Indoles and derivatives	Tryptamines and derivatives
Glyma.06G203400	M189T72_NEG	-0.502552	0.0335419	glutaminyl-tRNA synthetase (QARS, glnS)	Oxalosuccinate	Organic acids and derivatives	Carboxylic acids and derivatives	Tricarboxylic acids and derivatives
Glyma.06G203400	M190T606_NEG	0.552556	0.0174045	glutaminyl-tRNA synthetase (QARS, glnS)	5,6-Indolequinone-2-carboxylic acid	Organoheterocyclic compounds	Indoles and derivatives	NA
Glyma.06G203400	M192T261_POS	0.558667	0.0159558	glutaminyl-tRNA synthetase (QARS, glnS)	N-Acetylmethionine	Organic acids and derivatives	Carboxylic acids and derivatives	Amino acids, peptides, and analogues
Glyma.06G203400	M194T511_NEG	0.56948	0.0136273	glutaminyl-tRNA synthetase (QARS, glnS)	o-DOPA-quinone
Glyma.06G203400	M195T215_POS	-0.572987	0.0129333	glutaminyl-tRNA synthetase (QARS, glnS)	Methyl caffeate	Phenylpropanoids and polyketides	Cinnamic acids and derivatives	Hydroxycinnamic acids and derivatives
Glyma.06G203400	M195T386_NEG	0.578299	0.0119359	glutaminyl-tRNA synthetase (QARS, glnS)	3',5'-Dimethoxy-4'-hydroxyacetophenone	Organic oxygen compounds	Organooxygen compounds	Carbonyl compounds
Glyma.06G203400	M195T421_POS	0.539944	0.020723	glutaminyl-tRNA synthetase (QARS, glnS)	Ferulic acid	Phenylpropanoids and polyketides	Cinnamic acids and derivatives	Hydroxycinnamic acids and derivatives
Glyma.06G203400	M195T67_NEG	-0.595909	0.00906028	glutaminyl-tRNA synthetase (QARS, glnS)	D-Gluconic acid sodium salt	Organic oxygen compounds	Organooxygen compounds	Carbohydrates and carbohydrate conjugates
Glyma.06G203400	M197T292_POS	-0.577258	0.0121263	glutaminyl-tRNA synthetase (QARS, glnS)	2,4,5-Trimethoxybenzaldehyde	Benzenoids	Benzene and substituted derivatives	Benzoyl derivatives
Glyma.06G203400	M197T678_POS	0.620575	0.00599558	glutaminyl-tRNA synthetase (QARS, glnS)	Oxacyclotridec-10-en-2-one	Organic oxygen compounds	Organooxygen compounds	Carbonyl compounds
Glyma.06G203400	M198T446_POS	-0.585327	0.0107117	glutaminyl-tRNA synthetase (QARS, glnS)	D,L- gamma-hydroxyphosphinothricin
Glyma.06G203400	M199T446_POS	-0.554757	0.0168711	glutaminyl-tRNA synthetase (QARS, glnS)	Hercynine	Organic acids and derivatives	Carboxylic acids and derivatives	Amino acids, peptides, and analogues
Glyma.06G203400	M202T161_NEG	0.508193	0.0312925	glutaminyl-tRNA synthetase (QARS, glnS)	9-Methylthiononanaldoxime	Organic nitrogen compounds	Organonitrogen compounds	Oximes
Glyma.06G203400	M202T304_NEG	0.560625	0.0155124	glutaminyl-tRNA synthetase (QARS, glnS)	Indolepyruvate	Organoheterocyclic compounds	Indoles and derivatives	Indolyl carboxylic acids and derivatives
Glyma.06G203400	M206T414_POS	-0.565282	0.0144969	glutaminyl-tRNA synthetase (QARS, glnS)	3-Indolyllactic acid	Organoheterocyclic compounds	Indoles and derivatives	Indolyl carboxylic acids and derivatives
Glyma.06G203400	M206T416_NEG	-0.510477	0.0304157	glutaminyl-tRNA synthetase (QARS, glnS)	N-Acetylphenylalanine	Organic acids and derivatives	Carboxylic acids and derivatives	Amino acids, peptides, and analogues
Glyma.06G203400	M207T68_NEG	-0.564992	0.0145584	glutaminyl-tRNA synthetase (QARS, glnS)	Dihydrolipoate	Lipids and lipid-like molecules	Fatty Acyls	Fatty acids and conjugates
Glyma.06G203400	M209T108_NEG	0.501411	0.0340118	glutaminyl-tRNA synthetase (QARS, glnS)	D-Galactarate	Organic oxygen compounds	Organooxygen compounds	Carbohydrates and carbohydrate conjugates
Glyma.06G203400	M211T138_NEG	-0.553764	0.0171103	glutaminyl-tRNA synthetase (QARS, glnS)	2-Hydroxy-6-ketononatrienedioate	Organic acids and derivatives	Keto acids and derivatives	Medium-chain keto acids and derivatives
Glyma.06G203400	M211T355_NEG	0.56212	0.0151803	glutaminyl-tRNA synthetase (QARS, glnS)	7-Deoxyloganetin	Lipids and lipid-like molecules	Prenol lipids	Monoterpenoids
Glyma.06G203400	M211T567_POS	-0.626738	0.00537947	glutaminyl-tRNA synthetase (QARS, glnS)	(+)-7-Isojasmonic acid	Lipids and lipid-like molecules	Fatty Acyls	Lineolic acids and derivatives
Glyma.06G203400	M213T324_POS	0.518893	0.027348	glutaminyl-tRNA synthetase (QARS, glnS)	(2Z,4E,7E)-2-hydroxy-6-oxonona-2,4,7-triene-1,9-dioate
Glyma.06G203400	M217T482_POS	-0.531945	0.0230723	glutaminyl-tRNA synthetase (QARS, glnS)	5-Carboxy-2-oxohept-3-enedioate	Organic acids and derivatives	Carboxylic acids and derivatives	Tricarboxylic acids and derivatives
Glyma.06G203400	M220T564_NEG	0.533686	0.022544	glutaminyl-tRNA synthetase (QARS, glnS)	L-histidinol phosphate
Glyma.06G203400	M221T382_NEG	0.529732	0.0237577	glutaminyl-tRNA synthetase (QARS, glnS)	2-Succinylbenzoate	Organic oxygen compounds	Organooxygen compounds	Carbonyl compounds
Glyma.06G203400	M221T540_POS	-0.507123	0.0317101	glutaminyl-tRNA synthetase (QARS, glnS)	(-)-beta-Caryophyllene epoxide	Lipids and lipid-like molecules	Prenol lipids	Sesquiterpenoids
Glyma.06G203400	M221T698_NEG	0.609526	0.0072429	glutaminyl-tRNA synthetase (QARS, glnS)	Diethyl-phthalate	Benzenoids	Benzene and substituted derivatives	Benzoic acids and derivatives
Glyma.06G203400	M222T381_NEG	0.516249	0.0282845	glutaminyl-tRNA synthetase (QARS, glnS)	2-[(Carboxyacetyl)amino]benzoic acid	Benzenoids	Benzene and substituted derivatives	Benzoic acids and derivatives
Glyma.06G203400	M223T357_NEG	0.554182	0.0170094	glutaminyl-tRNA synthetase (QARS, glnS)	2-Benzylmalic acid	Phenylpropanoids and polyketides	Phenylpropanoic acids	NA
Glyma.06G203400	M223T482_NEG	0.567776	0.0139751	glutaminyl-tRNA synthetase (QARS, glnS)	Sinapic acid	Phenylpropanoids and polyketides	Cinnamic acids and derivatives	Hydroxycinnamic acids and derivatives
Glyma.06G203400	M224T94_POS	-0.629397	0.00513006	glutaminyl-tRNA synthetase (QARS, glnS)	Anhalonidine	Organoheterocyclic compounds	Tetrahydroisoquinolines	NA
Glyma.06G203400	M225T696_NEG	0.550292	0.0179669	glutaminyl-tRNA synthetase (QARS, glnS)	4,5-Dihydrovomifoliol	Lipids and lipid-like molecules	Prenol lipids	Sesquiterpenoids
Glyma.06G203400	M227T108_POS	-0.535701	0.0219446	glutaminyl-tRNA synthetase (QARS, glnS)	Chorismate	Organic acids and derivatives	Carboxylic acids and derivatives	Dicarboxylic acids and derivatives
Glyma.06G203400	M231T522_NEG	0.508542	0.0311575	glutaminyl-tRNA synthetase (QARS, glnS)	Cyclobrassinone	Organoheterocyclic compounds	Indoles and derivatives	Indoles
Glyma.06G203400	M231T573_POS	0.522819	0.0260019	glutaminyl-tRNA synthetase (QARS, glnS)	2,7-Dihydroxycadalene	Lipids and lipid-like molecules	Prenol lipids	Sesquiterpenoids
Glyma.06G203400	M233T491_NEG	0.553371	0.0172055	glutaminyl-tRNA synthetase (QARS, glnS)	Geranyl phosphate	Lipids and lipid-like molecules	Prenol lipids	Isoprenoid phosphates
Glyma.06G203400	M237T487_NEG	0.554661	0.0168943	glutaminyl-tRNA synthetase (QARS, glnS)	Sinapic acid methyl ester	Phenylpropanoids and polyketides	Cinnamic acids and derivatives	Hydroxycinnamic acids and derivatives
Glyma.06G203400	M241T345_POS	-0.554394	0.0169582	glutaminyl-tRNA synthetase (QARS, glnS)	(1R,6R)-6-Hydroxy-2-succinylcyclohexa-2,4-diene-1-carboxylate	Organic acids and derivatives	Keto acids and derivatives	Gamma-keto acids and derivatives
Glyma.06G203400	M241T476_NEG	0.589305	0.0100647	glutaminyl-tRNA synthetase (QARS, glnS)	D-myo-inositol 1,2-cyclic phosphate
Glyma.06G203400	M243T63_POS	-0.683366	0.00176972	glutaminyl-tRNA synthetase (QARS, glnS)	2-hydroxy-5-(methylsulfanyl)-3-oxopent-1-enyl 1-phosphate
Glyma.06G203400	M243T74_NEG	0.569807	0.0135615	glutaminyl-tRNA synthetase (QARS, glnS)	Pseudouridine	Nucleosides, nucleotides, and analogues	Nucleoside and nucleotide analogues	NA
Glyma.06G203400	M245T359_POS	-0.680064	0.00190037	glutaminyl-tRNA synthetase (QARS, glnS)	(-)-Falcarinol	Lipids and lipid-like molecules	Fatty Acyls	Fatty alcohols
Glyma.06G203400	M247T74_POS	0.585879	0.01062	glutaminyl-tRNA synthetase (QARS, glnS)	2,4-Bis(acetamido)-2,4,6-trideoxy-beta-L-altropyranose	Organic oxygen compounds	Organooxygen compounds	Carbohydrates and carbohydrate conjugates
Glyma.06G203400	M251T361_POS	-0.590949	0.00980669	glutaminyl-tRNA synthetase (QARS, glnS)	Samin	Organoheterocyclic compounds	Benzodioxoles
Glyma.06G203400	M251T65_POS	0.529466	0.0238411	glutaminyl-tRNA synthetase (QARS, glnS)	Cyclobrassinin sulfoxide	Organoheterocyclic compounds	Indoles and derivatives	Indoles
Glyma.06G203400	M255T559_POS	0.535783	0.0219202	glutaminyl-tRNA synthetase (QARS, glnS)	Daidzein	Phenylpropanoids and polyketides	Isoflavonoids	Isoflav-2-enes
Glyma.06G203400	M260T69_POS	-0.593772	0.00937609	glutaminyl-tRNA synthetase (QARS, glnS)	D-Glucosamine 6-phosphate	Organic oxygen compounds	Organooxygen compounds	Carbohydrates and carbohydrate conjugates
Glyma.06G203400	M261T228_POS	0.565008	0.014555	glutaminyl-tRNA synthetase (QARS, glnS)	Biotin sulfoxide	Organoheterocyclic compounds	Biotin and derivatives	NA
Glyma.06G203400	M261T236_POS	0.563834	0.0148066	glutaminyl-tRNA synthetase (QARS, glnS)	gamma-Glutamylleucine	Organic acids and derivatives	Carboxylic acids and derivatives	Amino acids, peptides, and analogues
Glyma.06G203400	M261T70_NEG	-0.581208	0.0114163	glutaminyl-tRNA synthetase (QARS, glnS)	D-Mannitol 1-phosphate	Organic oxygen compounds	Organooxygen compounds	Carbohydrates and carbohydrate conjugates
Glyma.06G203400	M261T73_POS	0.531513	0.023205	glutaminyl-tRNA synthetase (QARS, glnS)	Glucose-1-phosphate	Organic oxygen compounds	Organooxygen compounds	Carbohydrates and carbohydrate conjugates
Glyma.06G203400	M262T332_NEG	-0.507812	0.0314406	glutaminyl-tRNA synthetase (QARS, glnS)	Thiamine aldehyde	Organoheterocyclic compounds	Diazines	Pyrimidines and pyrimidine derivatives
Glyma.06G203400	M263T400_POS	0.533347	0.0226462	glutaminyl-tRNA synthetase (QARS, glnS)	9alpha-Hydroxyzaluzalin C	Lipids and lipid-like molecules	Prenol lipids	Terpene lactones
Glyma.06G203400	M265T450_POS	0.524552	0.0254243	glutaminyl-tRNA synthetase (QARS, glnS)	Ilicifolinoside A	Lipids and lipid-like molecules	Fatty Acyls	Fatty acyl glycosides
Glyma.06G203400	M265T565_POS	0.569657	0.0135916	glutaminyl-tRNA synthetase (QARS, glnS)	Abscisate	Lipids and lipid-like molecules	Prenol lipids	Sesquiterpenoids
Glyma.06G203400	M270T68_NEG	0.529771	0.0237455	glutaminyl-tRNA synthetase (QARS, glnS)	1,6-Dihydroxy-3-methoxy-10-methylacridone	Organoheterocyclic compounds	Quinolines and derivatives	Benzoquinolines
Glyma.06G203400	M273T214_POS	0.541585	0.020265	glutaminyl-tRNA synthetase (QARS, glnS)	Arbutin	Organic oxygen compounds	Organooxygen compounds	Carbohydrates and carbohydrate conjugates
Glyma.06G203400	M275T403_NEG	0.535975	0.0218639	glutaminyl-tRNA synthetase (QARS, glnS)	5-Amino-6-(1-D-ribitylamino)uracil	Organic oxygen compounds	Organooxygen compounds	Carbohydrates and carbohydrate conjugates
Glyma.06G203400	M276T774_POS	0.521111	0.026581	glutaminyl-tRNA synthetase (QARS, glnS)	Homatropine	Alkaloids and derivatives	Tropane alkaloids	NA
Glyma.06G203400	M277T119_NEG	0.574429	0.0126561	glutaminyl-tRNA synthetase (QARS, glnS)	gamma-Glutamylmethionine	Organic acids and derivatives	Carboxylic acids and derivatives	Amino acids, peptides, and analogues
Glyma.06G203400	M277T121_POS	0.544316	0.0195207	glutaminyl-tRNA synthetase (QARS, glnS)	Biotin sulfone	Organoheterocyclic compounds	Biotin and derivatives	NA
Glyma.06G203400	M279T469_NEG	0.508454	0.0311913	glutaminyl-tRNA synthetase (QARS, glnS)	8'-Hydroxyabscisate	Lipids and lipid-like molecules	Prenol lipids	Sesquiterpenoids
Glyma.06G203400	M280T413_NEG	0.50509	0.032515	glutaminyl-tRNA synthetase (QARS, glnS)	4-Hydroxyphenylacetylglutamic acid	Organic acids and derivatives	Carboxylic acids and derivatives	Amino acids, peptides, and analogues
Glyma.06G203400	M281T367_NEG	0.606194	0.00765771	glutaminyl-tRNA synthetase (QARS, glnS)	Dihydrophaseic acid	Lipids and lipid-like molecules	Prenol lipids	Sesquiterpenoids
Glyma.06G203400	M282T377_NEG	-0.538481	0.0211379	glutaminyl-tRNA synthetase (QARS, glnS)	Cucumopine	Organic acids and derivatives	Carboxylic acids and derivatives	Amino acids, peptides, and analogues
Glyma.06G203400	M283T383_NEG	-0.503188	0.0332824	glutaminyl-tRNA synthetase (QARS, glnS)	Psilocybin	Organoheterocyclic compounds	Indoles and derivatives	Tryptamines and derivatives
Glyma.06G203400	M283T538_POS	-0.576671	0.0122347	glutaminyl-tRNA synthetase (QARS, glnS)	Bisbynin
Glyma.06G203400	M284T98_POS	0.548384	0.0184521	glutaminyl-tRNA synthetase (QARS, glnS)	GUANOSINE	Nucleosides, nucleotides, and analogues	Purine nucleosides	NA
Glyma.06G203400	M285T70_NEG	0.532372	0.0229419	glutaminyl-tRNA synthetase (QARS, glnS)	E-Trichoclin	Phenylpropanoids and polyketides	Coumarins and derivatives	Furanocoumarins
Glyma.06G203400	M287T369_POS	-0.607689	0.00746928	glutaminyl-tRNA synthetase (QARS, glnS)	kaempferol	Phenylpropanoids and polyketides	Flavonoids	Flavones
Glyma.06G203400	M287T398_POS	-0.577001	0.0121736	glutaminyl-tRNA synthetase (QARS, glnS)	Luteolin	Phenylpropanoids and polyketides	Flavonoids	Flavones
Glyma.06G203400	M288T397_POS	-0.582428	0.0112039	glutaminyl-tRNA synthetase (QARS, glnS)	Cyanidin	Phenylpropanoids and polyketides	Flavonoids	Hydroxyflavonoids
Glyma.06G203400	M289T360_NEG	-0.514415	0.0289487	glutaminyl-tRNA synthetase (QARS, glnS)	(+)-Epicatechin	Phenylpropanoids and polyketides	Flavonoids	Flavans
Glyma.06G203400	M290T635_POS	-0.54505	0.0193244	glutaminyl-tRNA synthetase (QARS, glnS)	N-Succinyl-2-L-amino-6-oxoheptanedioate	Organic acids and derivatives	Carboxylic acids and derivatives	Amino acids, peptides, and analogues
Glyma.06G203400	M291T360_NEG	-0.522339	0.0261636	glutaminyl-tRNA synthetase (QARS, glnS)	cis-5-Methoxydecursidinol	Phenylpropanoids and polyketides	Coumarins and derivatives	Pyranocoumarins
Glyma.06G203400	M291T70_POS	0.554841	0.0168513	glutaminyl-tRNA synthetase (QARS, glnS)	N-(L-Arginino)succinate	Organic acids and derivatives	Carboxylic acids and derivatives	Amino acids, peptides, and analogues
Glyma.06G203400	M292T228_NEG	0.54636	0.0189777	glutaminyl-tRNA synthetase (QARS, glnS)	N-Acetylmuramate	Organic oxygen compounds	Organooxygen compounds	Carbohydrates and carbohydrate conjugates
Glyma.06G203400	M293T67_POS	-0.554421	0.0169518	glutaminyl-tRNA synthetase (QARS, glnS)	N4-Acetylsulfadiazine	Benzenoids	Benzene and substituted derivatives	Benzenesulfonamides
Glyma.06G203400	M295T549_NEG	-0.507998	0.0313682	glutaminyl-tRNA synthetase (QARS, glnS)	Phaseolic acid	Phenylpropanoids and polyketides	Cinnamic acids and derivatives	Hydroxycinnamic acids and derivatives
Glyma.06G203400	M295T780_NEG	0.586305	0.0105496	glutaminyl-tRNA synthetase (QARS, glnS)	13(S)-HODE	Lipids and lipid-like molecules	Fatty Acyls	Lineolic acids and derivatives
Glyma.06G203400	M298T190_POS	-0.503942	0.0329765	glutaminyl-tRNA synthetase (QARS, glnS)	5'-Methylthioadenosine	Nucleosides, nucleotides, and analogues	5'-deoxyribonucleosides	5'-deoxy-5'-thionucleosides
Glyma.06G203400	M298T307_NEG	0.582243	0.0112358	glutaminyl-tRNA synthetase (QARS, glnS)	(R)-N-Methylcoclaurine	Organoheterocyclic compounds	Isoquinolines and derivatives	Benzylisoquinolines
Glyma.06G203400	M299T844_NEG	0.632694	0.00483392	glutaminyl-tRNA synthetase (QARS, glnS)	(R)-2-hydroxystearic acid	Lipids and lipid-like molecules	Fatty Acyls	Fatty acids and conjugates
Glyma.06G203400	M302T69_POS	0.566193	0.0143044	glutaminyl-tRNA synthetase (QARS, glnS)	(S)-6-O-Methylnorlaudanosoline	Organoheterocyclic compounds	Isoquinolines and derivatives	Benzylisoquinolines
Glyma.06G203400	M305T94_NEG	-0.606671	0.00759716	glutaminyl-tRNA synthetase (QARS, glnS)	Leucocyanidin	Phenylpropanoids and polyketides	Flavonoids	Flavans
Glyma.06G203400	M309T220_NEG	-0.546645	0.0189032	glutaminyl-tRNA synthetase (QARS, glnS)	Feruloylmalic acid	Phenylpropanoids and polyketides	Cinnamic acids and derivatives	Hydroxycinnamic acids and derivatives
Glyma.06G203400	M309T420_POS	0.534404	0.0223288	glutaminyl-tRNA synthetase (QARS, glnS)	Azacridone A	Organoheterocyclic compounds	Benzopyrans	1-benzopyrans
Glyma.06G203400	M311T121_POS	0.571813	0.0131623	glutaminyl-tRNA synthetase (QARS, glnS)	gamma-Glutamyltyrosine	Organic acids and derivatives	Carboxylic acids and derivatives	Amino acids, peptides, and analogues
Glyma.06G203400	M311T680_POS	0.567243	0.0140853	glutaminyl-tRNA synthetase (QARS, glnS)	13(S)-Hydroperoxylinolenic acid	Lipids and lipid-like molecules	Fatty Acyls	Lineolic acids and derivatives
Glyma.06G203400	M312T554_NEG	-0.521666	0.0263916	glutaminyl-tRNA synthetase (QARS, glnS)	N-cis-Feruloyltyramine	Phenylpropanoids and polyketides	Cinnamic acids and derivatives	Hydroxycinnamic acids and derivatives
Glyma.06G203400	M315T340_NEG	-0.512295	0.0297314	glutaminyl-tRNA synthetase (QARS, glnS)	Cysteinyldopa	Organic acids and derivatives	Carboxylic acids and derivatives	Amino acids, peptides, and analogues
Glyma.06G203400	M315T477_POS	-0.517099	0.0279807	glutaminyl-tRNA synthetase (QARS, glnS)	Dihydropteroate	Organoheterocyclic compounds	Pteridines and derivatives	Pterins and derivatives
Glyma.06G203400	M319T495_2_POS	-0.509421	0.0308189	glutaminyl-tRNA synthetase (QARS, glnS)	myricetin
Glyma.06G203400	M321T508_POS	-0.521265	0.0265283	glutaminyl-tRNA synthetase (QARS, glnS)	Dihydromyricetin	Phenylpropanoids and polyketides	Flavonoids	Flavans
Glyma.06G203400	M321T608_POS	-0.560711	0.015493	glutaminyl-tRNA synthetase (QARS, glnS)	Ampelopsin	Phenylpropanoids and polyketides	Flavonoids	Flavans
Glyma.06G203400	M323T362_POS	-0.599005	0.00861791	glutaminyl-tRNA synthetase (QARS, glnS)	Leucodelphinidin	Phenylpropanoids and polyketides	Flavonoids	Flavans
Glyma.06G203400	M323T391_NEG	0.649798	0.00351254	glutaminyl-tRNA synthetase (QARS, glnS)	5-enolpyruvoyl-shikimate 3-phosphate
Glyma.06G203400	M323T463_POS	-0.520555	0.0267718	glutaminyl-tRNA synthetase (QARS, glnS)	Phaseolin	Phenylpropanoids and polyketides	Isoflavonoids	Furanoisoflavonoids
Glyma.06G203400	M324T463_POS	-0.505396	0.0323927	glutaminyl-tRNA synthetase (QARS, glnS)	Bialaphos	Organic acids and derivatives	Carboxylic acids and derivatives	Amino acids, peptides, and analogues
Glyma.06G203400	M325T198_NEG	0.551419	0.0176852	glutaminyl-tRNA synthetase (QARS, glnS)	trans-p-Coumaroyl beta-D-glucopyranoside	Phenylpropanoids and polyketides	Cinnamic acids and derivatives	Hydroxycinnamic acids and derivatives
Glyma.06G203400	M327T479_POS	0.519996	0.0269646	glutaminyl-tRNA synthetase (QARS, glnS)	NPE_327.1704_12.2	Organoheterocyclic compounds	Pyridines and derivatives	Pheniramines
Glyma.06G203400	M328T216_NEG	0.56582	0.014383	glutaminyl-tRNA synthetase (QARS, glnS)	(R)-Reticuline	Organoheterocyclic compounds	Isoquinolines and derivatives	Benzylisoquinolines
Glyma.06G203400	M328T375_NEG	-0.543651	0.0197001	glutaminyl-tRNA synthetase (QARS, glnS)	Citropone C	Organoheterocyclic compounds	Quinolines and derivatives	Quinolones and derivatives
Glyma.06G203400	M329T373_POS	-0.570926	0.0133376	glutaminyl-tRNA synthetase (QARS, glnS)	2-Succinyl-5-enolpyruvyl-6-hydroxy-3-cyclohexene-1-carboxylate	Organic acids and derivatives	Carboxylic acids and derivatives	Tricarboxylic acids and derivatives
Glyma.06G203400	M329T510_NEG	-0.579225	0.0117685	glutaminyl-tRNA synthetase (QARS, glnS)	Jasminoside A	Organic oxygen compounds	Organooxygen compounds	Carbohydrates and carbohydrate conjugates
Glyma.06G203400	M330T105_POS	0.586154	0.0105745	glutaminyl-tRNA synthetase (QARS, glnS)	Desulfoglucotropeolin	Organic oxygen compounds	Organooxygen compounds	Carbohydrates and carbohydrate conjugates
Glyma.06G203400	M330T168_NEG	-0.561325	0.0153561	glutaminyl-tRNA synthetase (QARS, glnS)	Atalafoline	Organoheterocyclic compounds	Quinolines and derivatives	Benzoquinolines
Glyma.06G203400	M333T205_POS	0.506898	0.0317984	glutaminyl-tRNA synthetase (QARS, glnS)	Sanguinarine	Alkaloids and derivatives	Benzophenanthridine alkaloids	Quaternary benzophenanthridine alkaloids
Glyma.06G203400	M334T437_NEG	0.581998	0.0112784	glutaminyl-tRNA synthetase (QARS, glnS)	Lobelanine	Organic oxygen compounds	Organooxygen compounds	Carbonyl compounds
Glyma.06G203400	M335T71_POS	0.515905	0.0284084	glutaminyl-tRNA synthetase (QARS, glnS)	Nicotinamide D-ribonucleotide	Nucleosides, nucleotides, and analogues	Pyridine nucleotides	Nicotinamide nucleotides
Glyma.06G203400	M336T331_NEG	-0.523495	0.0257755	glutaminyl-tRNA synthetase (QARS, glnS)	Baiyumine A	Organoheterocyclic compounds	Quinolines and derivatives	Benzoquinolines
Glyma.06G203400	M338T408_NEG	0.567285	0.0140766	glutaminyl-tRNA synthetase (QARS, glnS)	5-hydroxy-CMP
Glyma.06G203400	M339T364_POS	-0.583864	0.010958	glutaminyl-tRNA synthetase (QARS, glnS)	1-(5'-Phosphoribosyl)-5-amino-4-imidazolecarboxamide	Nucleosides, nucleotides, and analogues	Imidazole ribonucleosides and ribonucleotides	1-ribosyl-imidazolecarboxamides
Glyma.06G203400	M339T366_NEG	0.570902	0.0133425	glutaminyl-tRNA synthetase (QARS, glnS)	Dihydro-O-methylsterigmatocystin	Phenylpropanoids and polyketides	Sterigmatocystins	NA
Glyma.06G203400	M339T538_POS	0.674133	0.002155	glutaminyl-tRNA synthetase (QARS, glnS)	Columbamine	Alkaloids and derivatives	Protoberberine alkaloids and derivatives	NA
Glyma.06G203400	M341T309_NEG	0.538106	0.0212453	glutaminyl-tRNA synthetase (QARS, glnS)	Coniferin	Organic oxygen compounds	Organooxygen compounds	Carbohydrates and carbohydrate conjugates
Glyma.06G203400	M341T67_NEG	0.5514	0.0176899	glutaminyl-tRNA synthetase (QARS, glnS)	Trehalose	Organic oxygen compounds	Organooxygen compounds	Carbohydrates and carbohydrate conjugates
Glyma.06G203400	M342T354_NEG	0.545124	0.0193047	glutaminyl-tRNA synthetase (QARS, glnS)	Laudanine	Organoheterocyclic compounds	Isoquinolines and derivatives	Benzylisoquinolines
Glyma.06G203400	M343T466_POS	-0.505859	0.0322088	glutaminyl-tRNA synthetase (QARS, glnS)	5,7,3',4'-Tetramethoxyflavone	Phenylpropanoids and polyketides	Flavonoids	O-methylated flavonoids
Glyma.06G203400	M344T352_POS	0.515657	0.0284977	glutaminyl-tRNA synthetase (QARS, glnS)	(S)-Tetrahydropapaverine	Organoheterocyclic compounds	Isoquinolines and derivatives	Benzylisoquinolines
Glyma.06G203400	M345T228_NEG	0.579069	0.0117966	glutaminyl-tRNA synthetase (QARS, glnS)	Miraxanthin V	Organic acids and derivatives	Carboxylic acids and derivatives	Amino acids, peptides, and analogues
Glyma.06G203400	M345T542_NEG	0.518308	0.0275531	glutaminyl-tRNA synthetase (QARS, glnS)	Gibberellin A3	Lipids and lipid-like molecules	Prenol lipids	Diterpenoids
Glyma.06G203400	M346T633_NEG	-0.718183	0.000788274	glutaminyl-tRNA synthetase (QARS, glnS)	AMP group
Glyma.06G203400	M347T115_NEG	0.554677	0.0168903	glutaminyl-tRNA synthetase (QARS, glnS)	IMP	Nucleosides, nucleotides, and analogues	Purine nucleotides	Purine ribonucleotides
Glyma.06G203400	M349T370_NEG	0.512475	0.0296643	glutaminyl-tRNA synthetase (QARS, glnS)	Polyneuridine aldehyde
Glyma.06G203400	M352T442_POS	-0.52477	0.0253527	glutaminyl-tRNA synthetase (QARS, glnS)	Rhizocticin A	Organic acids and derivatives	Carboxylic acids and derivatives	Amino acids, peptides, and analogues
Glyma.06G203400	M353T442_NEG	0.517443	0.0278584	glutaminyl-tRNA synthetase (QARS, glnS)	5-amino-6-(5-phospho-D-ribosylamino)uracil
Glyma.06G203400	M353T464_NEG	-0.504507	0.0327486	glutaminyl-tRNA synthetase (QARS, glnS)	3-O-Caffeoylquinic acid	Organic oxygen compounds	Organooxygen compounds	Alcohols and polyols
Glyma.06G203400	M357T217_POS	-0.687478	0.00161752	glutaminyl-tRNA synthetase (QARS, glnS)	5-Amino-6-(5'-phospho-D-ribitylamino)uracil	Organic oxygen compounds	Organooxygen compounds	Carbohydrates and carbohydrate conjugates
Glyma.06G203400	M359T548_POS	-0.558356	0.016027	glutaminyl-tRNA synthetase (QARS, glnS)	N1-(5-Phospho-alpha-D-ribosyl)-5,6-dimethylbenzimidazole	Nucleosides, nucleotides, and analogues	Benzimidazole ribonucleosides and ribonucleotides	NA
Glyma.06G203400	M361T607_NEG	0.568109	0.0139066	glutaminyl-tRNA synthetase (QARS, glnS)	Gibberellin A93	Lipids and lipid-like molecules	Prenol lipids	Diterpenoids
Glyma.06G203400	M363T573_NEG	0.518533	0.0274742	glutaminyl-tRNA synthetase (QARS, glnS)	Gibberellin A8	Lipids and lipid-like molecules	Prenol lipids	Diterpenoids
Glyma.06G203400	M365T595_NEG	0.539118	0.0209564	glutaminyl-tRNA synthetase (QARS, glnS)	5-formamido-1-(5-phospho-D-ribosyl)-imidazole-4-carboxamide
Glyma.06G203400	M365T68_POS	0.547446	0.0186943	glutaminyl-tRNA synthetase (QARS, glnS)	Justicidin B	Lignans, neolignans and related compounds	Arylnaphthalene lignans	NA
Glyma.06G203400	M366T481_NEG	-0.587808	0.0103045	glutaminyl-tRNA synthetase (QARS, glnS)	Citracridone II	Organoheterocyclic compounds	Quinolines and derivatives	Benzoquinolines
Glyma.06G203400	M367T461_NEG	0.583483	0.0110227	glutaminyl-tRNA synthetase (QARS, glnS)	11-Dehydro-thromboxane B2	Lipids and lipid-like molecules	Fatty Acyls	Eicosanoids
Glyma.06G203400	M367T509_NEG	0.529657	0.0237813	glutaminyl-tRNA synthetase (QARS, glnS)	4-O-Methylxanthohumol	Phenylpropanoids and polyketides	Linear 1,3-diarylpropanoids	Chalcones and dihydrochalcones
Glyma.06G203400	M367T680_POS	0.562587	0.0150777	glutaminyl-tRNA synthetase (QARS, glnS)	Bufotenine O-glucoside	Organic oxygen compounds	Organooxygen compounds	Carbohydrates and carbohydrate conjugates
Glyma.06G203400	M369T466_NEG	-0.555923	0.016594	glutaminyl-tRNA synthetase (QARS, glnS)	Fraxin	Phenylpropanoids and polyketides	Coumarins and derivatives	Coumarin glycosides
Glyma.06G203400	M369T697_POS	0.696272	0.00132815	glutaminyl-tRNA synthetase (QARS, glnS)	orotidine 5-phosphate
Glyma.06G203400	M371T303_NEG	0.57513	0.0125231	glutaminyl-tRNA synthetase (QARS, glnS)	2-O-caffeoylglucarate
Glyma.06G203400	M371T539_NEG	-0.615194	0.00657924	glutaminyl-tRNA synthetase (QARS, glnS)	Biocytin	Organoheterocyclic compounds	Biotin and derivatives	NA
Glyma.06G203400	M373T133_POS	0.564559	0.0146509	glutaminyl-tRNA synthetase (QARS, glnS)	Citrusin E	Organic oxygen compounds	Organooxygen compounds	Carbohydrates and carbohydrate conjugates
Glyma.06G203400	M373T217_NEG	-0.523327	0.0258317	glutaminyl-tRNA synthetase (QARS, glnS)	Geniposidic acid	Lipids and lipid-like molecules	Prenol lipids	Terpene glycosides
Glyma.06G203400	M374T190_POS	-0.62018	0.00603698	glutaminyl-tRNA synthetase (QARS, glnS)	DIMBOA glucoside	Organic oxygen compounds	Organooxygen compounds	Carbohydrates and carbohydrate conjugates
Glyma.06G203400	M374T406_POS	-0.528565	0.0241254	glutaminyl-tRNA synthetase (QARS, glnS)	N-acetyl-D-muramate 6-phosphate
Glyma.06G203400	M375T507_POS	-0.522016	0.0262728	glutaminyl-tRNA synthetase (QARS, glnS)	5,7,2',3',4'-Pentamethoxyflavanone	Phenylpropanoids and polyketides	Flavonoids	O-methylated flavonoids
Glyma.06G203400	M375T511_POS	-0.611518	0.00700372	glutaminyl-tRNA synthetase (QARS, glnS)	Deoxyloganin	Lipids and lipid-like molecules	Prenol lipids	Terpene glycosides
Glyma.06G203400	M375T621_NEG	0.539302	0.0209042	glutaminyl-tRNA synthetase (QARS, glnS)	trans-Grandmarin isovalerate	Phenylpropanoids and polyketides	Coumarins and derivatives	Pyranocoumarins
Glyma.06G203400	M377T185_POS	-0.562689	0.0150555	glutaminyl-tRNA synthetase (QARS, glnS)	Limocitrol	Phenylpropanoids and polyketides	Flavonoids	Flavones
Glyma.06G203400	M377T346_POS	-0.576931	0.0121867	glutaminyl-tRNA synthetase (QARS, glnS)	Riboflavin	Organoheterocyclic compounds	Pteridines and derivatives	Alloxazines and isoalloxazines
Glyma.06G203400	M377T769_POS	0.602126	0.00818983	glutaminyl-tRNA synthetase (QARS, glnS)	9-cis-10'-Apo-beta-carotenal	Lipids and lipid-like molecules	Prenol lipids	Sesterterpenoids
Glyma.06G203400	M382T362_NEG	0.522651	0.0260584	glutaminyl-tRNA synthetase (QARS, glnS)	7-Methylthioheptyl-desulfoglucosinolate	Organic oxygen compounds	Organooxygen compounds	Carbohydrates and carbohydrate conjugates
Glyma.06G203400	M383T456_NEG	0.542574	0.0199928	glutaminyl-tRNA synthetase (QARS, glnS)	16-Methoxy-2,3-dihydro-3-hydroxytabersonine	Alkaloids and derivatives	Plumeran-type alkaloids	NA
Glyma.06G203400	M387T307_POS	0.638484	0.00434774	glutaminyl-tRNA synthetase (QARS, glnS)	1-O-Sinapoyl-beta-D-glucose	Phenylpropanoids and polyketides	Cinnamic acids and derivatives	Hydroxycinnamic acids and derivatives
Glyma.06G203400	M387T311_NEG	0.535577	0.021981	glutaminyl-tRNA synthetase (QARS, glnS)	Secologanin	Lipids and lipid-like molecules	Prenol lipids	Terpene glycosides
Glyma.06G203400	M396T433_NEG	0.518128	0.0276166	glutaminyl-tRNA synthetase (QARS, glnS)	8-Methylthiooctyl-desulfoglucosinolate	Organic oxygen compounds	Organooxygen compounds	Carbohydrates and carbohydrate conjugates
Glyma.06G203400	M398T511_POS	-0.549202	0.0182428	glutaminyl-tRNA synthetase (QARS, glnS)	2-Methylthioribosyl-trans-zeatin	Nucleosides, nucleotides, and analogues	Purine nucleosides
Glyma.06G203400	M400T357_NEG	-0.50011	0.0345537	glutaminyl-tRNA synthetase (QARS, glnS)	(-)-Margrapine A	Organoheterocyclic compounds	Quinolines and derivatives	Benzoquinolines
Glyma.06G203400	M401T480_POS	0.508356	0.0312292	glutaminyl-tRNA synthetase (QARS, glnS)	(+)-2-Episesalatin	Lignans, neolignans and related compounds	Furanoid lignans
Glyma.06G203400	M402T549_POS	-0.577752	0.0120356	glutaminyl-tRNA synthetase (QARS, glnS)	5-Hexenyl glucosinolate	Organic oxygen compounds	Organooxygen compounds	Carbohydrates and carbohydrate conjugates
Glyma.06G203400	M403T385_NEG	0.501083	0.0341479	glutaminyl-tRNA synthetase (QARS, glnS)	Scanderone	Phenylpropanoids and polyketides	Isoflavonoids	Pyranoisoflavonoids
Glyma.06G203400	M403T549_POS	-0.522681	0.0260483	glutaminyl-tRNA synthetase (QARS, glnS)	(R)-4'-Phosphopantothenoyl-L-cysteine	Organic acids and derivatives	Peptidomimetics	Hybrid peptides
Glyma.06G203400	M405T307_POS	0.525882	0.0249881	glutaminyl-tRNA synthetase (QARS, glnS)	UDP group
Glyma.06G203400	M405T528_POS	-0.533047	0.0227368	glutaminyl-tRNA synthetase (QARS, glnS)	UDP
Glyma.06G203400	M408T563_NEG	0.595589	0.00910691	glutaminyl-tRNA synthetase (QARS, glnS)	Benzylglucosinolate	Organic oxygen compounds	Organooxygen compounds	Carbohydrates and carbohydrate conjugates
Glyma.06G203400	M409T317_NEG	-0.514637	0.0288677	glutaminyl-tRNA synthetase (QARS, glnS)	Heliocide H1	Benzenoids	Anthracenes	Anthraquinones
Glyma.06G203400	M411T115_POS	-0.536501	0.02171	glutaminyl-tRNA synthetase (QARS, glnS)	N1-p-Coumaroyl-N4-feruloylputrescine	Phenylpropanoids and polyketides	Cinnamic acids and derivatives	Hydroxycinnamic acids and derivatives
Glyma.06G203400	M411T590_NEG	0.52246	0.0261228	glutaminyl-tRNA synthetase (QARS, glnS)	11beta,13-Dihydrolactucopicrin	Benzenoids	Phenols	1-hydroxy-2-unsubstituted benzenoids
Glyma.06G203400	M413T366_NEG	-0.54419	0.0195546	glutaminyl-tRNA synthetase (QARS, glnS)	Asperuloside	Organic oxygen compounds	Organooxygen compounds	Carbohydrates and carbohydrate conjugates
Glyma.06G203400	M414T366_NEG	-0.564849	0.0145889	glutaminyl-tRNA synthetase (QARS, glnS)	N6-(delta2-Isopentenyl)-adenosine 5'-monophosphate	Nucleosides, nucleotides, and analogues	Purine nucleotides	Purine ribonucleotides
Glyma.06G203400	M417T549_NEG	-0.517868	0.0277082	glutaminyl-tRNA synthetase (QARS, glnS)	5'-Butyrylphosphoinosine	Nucleosides, nucleotides, and analogues	Purine nucleotides	Purine ribonucleotides
Glyma.06G203400	M419T122_NEG	0.515265	0.0286395	glutaminyl-tRNA synthetase (QARS, glnS)	D-myo-inositol (1,3,4)-trisphosphate
Glyma.06G203400	M421T352_NEG	0.557687	0.0161814	glutaminyl-tRNA synthetase (QARS, glnS)	Losartan	Benzenoids	Benzene and substituted derivatives	Biphenyls and derivatives
Glyma.06G203400	M423T352_NEG	0.547198	0.0187589	glutaminyl-tRNA synthetase (QARS, glnS)	Chitobiose
Glyma.06G203400	M425T440_NEG	0.51643	0.0282198	glutaminyl-tRNA synthetase (QARS, glnS)	Lactuside A	Lipids and lipid-like molecules	Prenol lipids	Terpene lactones
Glyma.06G203400	M427T460_POS	-0.689646	0.00154177	glutaminyl-tRNA synthetase (QARS, glnS)	dZDP
Glyma.06G203400	M435T443_NEG	-0.509856	0.0306523	glutaminyl-tRNA synthetase (QARS, glnS)	Homomangiferin	Organoheterocyclic compounds	Benzopyrans	1-benzopyrans
Glyma.06G203400	M439T509_NEG	-0.607774	0.00745866	glutaminyl-tRNA synthetase (QARS, glnS)	Cichorioside B	Organic oxygen compounds	Organooxygen compounds	Carbohydrates and carbohydrate conjugates
Glyma.06G203400	M442T360_NEG	0.63496	0.0046386	glutaminyl-tRNA synthetase (QARS, glnS)	Dihydrofolate	Organic acids and derivatives	Carboxylic acids and derivatives	Amino acids, peptides, and analogues
Glyma.06G203400	M442T403_NEG	0.539272	0.0209127	glutaminyl-tRNA synthetase (QARS, glnS)	GDP group
Glyma.06G203400	M442T491_NEG	-0.731122	0.000566312	glutaminyl-tRNA synthetase (QARS, glnS)	GDP
Glyma.06G203400	M443T145_NEG	0.57726	0.012126	glutaminyl-tRNA synthetase (QARS, glnS)	Ichangensin	Lipids and lipid-like molecules	Steroids and steroid derivatives	Steroid lactones
Glyma.06G203400	M443T384_POS	-0.517943	0.0276816	glutaminyl-tRNA synthetase (QARS, glnS)	1-O-(9Z,12Z,15Z-Octadecatrienoyl)-D-glucitol	Lipids and lipid-like molecules	Fatty Acyls	Fatty alcohols
Glyma.06G203400	M443T608_POS	-0.550046	0.0180289	glutaminyl-tRNA synthetase (QARS, glnS)	(-)-Epicatechin 3-O-gallate	Phenylpropanoids and polyketides	Flavonoids	Flavans
Glyma.06G203400	M443T609_NEG	-0.519494	0.0271384	glutaminyl-tRNA synthetase (QARS, glnS)	Betavulgarin xyloside	Phenylpropanoids and polyketides	Isoflavonoids	Isoflav-2-enes
Glyma.06G203400	M445T355_2_POS	-0.511027	0.0302077	glutaminyl-tRNA synthetase (QARS, glnS)	(13S,14R)-1,8-Dihydroxy-13-O-acetyl-N-methylcanadine	Alkaloids and derivatives	Protoberberine alkaloids and derivatives	NA
Glyma.06G203400	M445T449_POS	0.580232	0.0115886	glutaminyl-tRNA synthetase (QARS, glnS)	3-(O-Geranylgeranyl)-sn-glycerol 1-phosphate	Lipids and lipid-like molecules	Prenol lipids	Diterpenoids
Glyma.06G203400	M446T356_POS	-0.60257	0.00813025	glutaminyl-tRNA synthetase (QARS, glnS)	Tetrahydrofolate	Organic acids and derivatives	Carboxylic acids and derivatives	Amino acids, peptides, and analogues
Glyma.06G203400	M449T396_1_POS	-0.546125	0.0190398	glutaminyl-tRNA synthetase (QARS, glnS)	Aureusidin 6-O-glucoside	Phenylpropanoids and polyketides	Flavonoids	Flavonoid glycosides
Glyma.06G203400	M451T384_NEG	-0.518462	0.0274991	glutaminyl-tRNA synthetase (QARS, glnS)	3''-Oxoribostamycin	Organic oxygen compounds	Organooxygen compounds	Carbohydrates and carbohydrate conjugates
Glyma.06G203400	M453T303_NEG	0.579772	0.0116706	glutaminyl-tRNA synthetase (QARS, glnS)	Quadrangularin A	Phenylpropanoids and polyketides	Stilbenes
Glyma.06G203400	M453T514_NEG	-0.620941	0.00595745	glutaminyl-tRNA synthetase (QARS, glnS)	Obacunone	Lipids and lipid-like molecules	Prenol lipids	Triterpenoids
Glyma.06G203400	M454T434_NEG	-0.536523	0.0217035	glutaminyl-tRNA synthetase (QARS, glnS)	5-Ribosylparomamine	Organic oxygen compounds	Organooxygen compounds	Carbohydrates and carbohydrate conjugates
Glyma.06G203400	M455T419_NEG	0.558247	0.0160521	glutaminyl-tRNA synthetase (QARS, glnS)	Vindoline	Alkaloids and derivatives	Plumeran-type alkaloids	NA
Glyma.06G203400	M455T460_NEG	-0.586406	0.010533	glutaminyl-tRNA synthetase (QARS, glnS)	5,10-Methenyltetrahydrofolate	Organoheterocyclic compounds	Pteridines and derivatives	Pterins and derivatives
Glyma.06G203400	M456T109_NEG	0.527566	0.024444	glutaminyl-tRNA synthetase (QARS, glnS)	5,10-Methylenetetrahydrofolate	Organoheterocyclic compounds	Pteridines and derivatives	Pterins and derivatives
Glyma.06G203400	M457T431_POS	-0.610907	0.00707643	glutaminyl-tRNA synthetase (QARS, glnS)	Phytyl pyrophosphate	Lipids and lipid-like molecules	Prenol lipids	Diterpenoids
Glyma.06G203400	M458T565_NEG	-0.540262	0.0206336	glutaminyl-tRNA synthetase (QARS, glnS)	Deoxytubulosine	Alkaloids and derivatives	Harmala alkaloids	NA
Glyma.06G203400	M461T490_NEG	-0.501675	0.0339027	glutaminyl-tRNA synthetase (QARS, glnS)	6-C-beta-D-Glucopyranosyldiosmetin	Phenylpropanoids and polyketides	Flavonoids	Flavonoid glycosides
Glyma.06G203400	M463T355_POS	0.532272	0.0229724	glutaminyl-tRNA synthetase (QARS, glnS)	Retrocalamin	Organoheterocyclic compounds	Naphthopyrans
Glyma.06G203400	M463T486_POS	-0.803733	5.85752e-05	glutaminyl-tRNA synthetase (QARS, glnS)	Peonidin-3-O-beta-galactoside	Phenylpropanoids and polyketides	Flavonoids	Flavonoid glycosides
Glyma.06G203400	M469T272_NEG	0.511317	0.030098	glutaminyl-tRNA synthetase (QARS, glnS)	Limonin	Lipids and lipid-like molecules	Prenol lipids	Triterpenoids
Glyma.06G203400	M469T593_NEG	0.52455	0.025425	glutaminyl-tRNA synthetase (QARS, glnS)	6',7'-Decylidenemarmin	Phenylpropanoids and polyketides	Coumarins and derivatives
Glyma.06G203400	M471T671_POS	-0.672688	0.00222108	glutaminyl-tRNA synthetase (QARS, glnS)	Gypsogenin	Lipids and lipid-like molecules	Prenol lipids	Triterpenoids
Glyma.06G203400	M474T166_POS	-0.531948	0.0230714	glutaminyl-tRNA synthetase (QARS, glnS)	10-Formyltetrahydrofolate	Organoheterocyclic compounds	Pteridines and derivatives	Pterins and derivatives
Glyma.06G203400	M475T360_1_POS	-0.565951	0.0143553	glutaminyl-tRNA synthetase (QARS, glnS)	Cichoric acid	Organic acids and derivatives	Carboxylic acids and derivatives	Tetracarboxylic acids and derivatives
Glyma.06G203400	M478T469_POS	0.559749	0.0157095	glutaminyl-tRNA synthetase (QARS, glnS)	CDP-glycerol
Glyma.06G203400	M479T725_NEG	0.514216	0.0290215	glutaminyl-tRNA synthetase (QARS, glnS)	6'-Oxogentamicin X2	NA	NA	NA
Glyma.06G203400	M484T237_POS	0.549804	0.0180901	glutaminyl-tRNA synthetase (QARS, glnS)	CTP
Glyma.06G203400	M487T499_NEG	-0.524604	0.0254072	glutaminyl-tRNA synthetase (QARS, glnS)	Ichangin	Lipids and lipid-like molecules	Prenol lipids	Terpene lactones
Glyma.06G203400	M492T277_NEG	0.695987	0.00133681	glutaminyl-tRNA synthetase (QARS, glnS)	Primulin	Phenylpropanoids and polyketides	Flavonoids	Flavonoid glycosides
Glyma.06G203400	M500T236_POS	0.547598	0.0186548	glutaminyl-tRNA synthetase (QARS, glnS)	5-hydroxy-CTP
Glyma.06G203400	M503T463_POS	-0.531304	0.0232693	glutaminyl-tRNA synthetase (QARS, glnS)	Shihulimonin A	Lipids and lipid-like molecules	Prenol lipids	Triterpenoids
Glyma.06G203400	M505T332_NEG	-0.564162	0.014736	glutaminyl-tRNA synthetase (QARS, glnS)	adenylyl-imidodiphosphate
Glyma.06G203400	M506T463_POS	-0.5204	0.0268252	glutaminyl-tRNA synthetase (QARS, glnS)	Alangiside	Organic oxygen compounds	Organooxygen compounds	Carbohydrates and carbohydrate conjugates
Glyma.06G203400	M507T543_POS	-0.53098	0.0233692	glutaminyl-tRNA synthetase (QARS, glnS)	Kunzeachromone C	Organic oxygen compounds	Organooxygen compounds	Carbohydrates and carbohydrate conjugates
Glyma.06G203400	M514T409_POS	0.575512	0.0124512	glutaminyl-tRNA synthetase (QARS, glnS)	Zeatin riboside-O-glucoside	Nucleosides, nucleotides, and analogues	Purine nucleosides
Glyma.06G203400	M519T353_NEG	0.51503	0.0287249	glutaminyl-tRNA synthetase (QARS, glnS)	Quinate	Organic oxygen compounds	Organooxygen compounds	Alcohols and polyols
Glyma.06G203400	M521T258_POS	-0.540438	0.0205842	glutaminyl-tRNA synthetase (QARS, glnS)	Calamin	Lipids and lipid-like molecules	Steroids and steroid derivatives	Steroid lactones
Glyma.06G203400	M522T70_NEG	0.578381	0.0119209	glutaminyl-tRNA synthetase (QARS, glnS)	8-oxo-dGTP
Glyma.06G203400	M523T351_POS	0.560361	0.0155714	glutaminyl-tRNA synthetase (QARS, glnS)	Syringetin 3-glucuronide	Phenylpropanoids and polyketides	Flavonoids	Flavonoid glycosides
Glyma.06G203400	M525T512_NEG	0.554897	0.0168378	glutaminyl-tRNA synthetase (QARS, glnS)	Phaseolus epsilon	Lipids and lipid-like molecules	Prenol lipids	Terpene glycosides
Glyma.06G203400	M531T67_NEG	0.55295	0.0173081	glutaminyl-tRNA synthetase (QARS, glnS)	6-Methoxygossypol	Lipids and lipid-like molecules	Prenol lipids	Sesquiterpenoids
Glyma.06G203400	M533T237_NEG	0.513554	0.0292647	glutaminyl-tRNA synthetase (QARS, glnS)	Kunzeaphlogin A	Organic oxygen compounds	Organooxygen compounds	Carbohydrates and carbohydrate conjugates
Glyma.06G203400	M533T523_NEG	-0.53293	0.0227722	glutaminyl-tRNA synthetase (QARS, glnS)	N-Demethyl-desepoxymaytansinol	Phenylpropanoids and polyketides	Macrolactams	NA
Glyma.06G203400	M534T486_NEG	0.540399	0.0205952	glutaminyl-tRNA synthetase (QARS, glnS)	Cyanidin 3-(6''-malonylglucoside)	Phenylpropanoids and polyketides	Flavonoids	Flavonoid glycosides
Glyma.06G203400	M535T292_POS	0.5201	0.0269285	glutaminyl-tRNA synthetase (QARS, glnS)	2,16,19,20,25-Pentahydroxycucurbit-5-ene-3,11,22-trione	Lipids and lipid-like molecules	Steroids and steroid derivatives	Cucurbitacins
Glyma.06G203400	M535T486_POS	0.662341	0.00274513	glutaminyl-tRNA synthetase (QARS, glnS)	Luteolin 7-O-(6''-malonylglucoside)	Phenylpropanoids and polyketides	Flavonoids	Flavonoid glycosides
Glyma.06G203400	M543T526_POS	-0.525815	0.0250098	glutaminyl-tRNA synthetase (QARS, glnS)	Chaetoglobosin N	Alkaloids and derivatives	Cytochalasans	Chaetoglobosins
Glyma.06G203400	M544T303_POS	0.571653	0.0131938	glutaminyl-tRNA synthetase (QARS, glnS)	(-)-Acrimarine D	Organoheterocyclic compounds	Quinolines and derivatives	Benzoquinolines
Glyma.06G203400	M547T421_POS	0.519693	0.0270694	glutaminyl-tRNA synthetase (QARS, glnS)	alpha-1,5-L-Arabinotetraose	Organic oxygen compounds	Organooxygen compounds	Carbohydrates and carbohydrate conjugates
Glyma.06G203400	M557T380_POS	0.566203	0.0143024	glutaminyl-tRNA synthetase (QARS, glnS)	8-Ethyl-12-methyl-3-vinylbacteriochlorophyllide d
Glyma.06G203400	M559T535_NEG	0.521402	0.0264816	glutaminyl-tRNA synthetase (QARS, glnS)	3'-Deoxymaysin	Phenylpropanoids and polyketides	Flavonoids	Flavonoid glycosides
Glyma.06G203400	M561T159_NEG	0.557035	0.0163329	glutaminyl-tRNA synthetase (QARS, glnS)	Protoporphyrin	Organoheterocyclic compounds	Tetrapyrroles and derivatives	Porphyrins
Glyma.06G203400	M565T426_1_POS	-0.633656	0.00475021	glutaminyl-tRNA synthetase (QARS, glnS)	dTDP-alpha-D-glucose
Glyma.06G203400	M576T508_POS	0.52377	0.0256836	glutaminyl-tRNA synthetase (QARS, glnS)	N6-(Delta2-isopentenyl)-adenosine 5-triphosphate
Glyma.06G203400	M577T338_NEG	0.533851	0.0224944	glutaminyl-tRNA synthetase (QARS, glnS)	Procyanidin B1	Phenylpropanoids and polyketides	Flavonoids	Biflavonoids and polyflavonoids
Glyma.06G203400	M577T402_NEG	-0.547692	0.0186305	glutaminyl-tRNA synthetase (QARS, glnS)	Rhoifolin	Phenylpropanoids and polyketides	Flavonoids	Flavonoid glycosides
Glyma.06G203400	M579T402_POS	-0.658336	0.00297344	glutaminyl-tRNA synthetase (QARS, glnS)	Apigenin-7-O-neohesperidoside	Phenylpropanoids and polyketides	Flavonoids	Flavonoid glycosides
Glyma.06G203400	M580T402_POS	-0.677623	0.00200198	glutaminyl-tRNA synthetase (QARS, glnS)	Pelargonidin 3-rutinoside	Phenylpropanoids and polyketides	Flavonoids	Flavonoid glycosides
Glyma.06G203400	M582T462_NEG	-0.580854	0.0114785	glutaminyl-tRNA synthetase (QARS, glnS)	Neoacrimarine C	Organoheterocyclic compounds	Quinolines and derivatives	Benzoquinolines
Glyma.06G203400	M593T476_2_POS	-0.525723	0.0250399	glutaminyl-tRNA synthetase (QARS, glnS)	2''-O-alpha-L-Rhamnosyl-6-C-fucosyl-3'-methoxyluteoiin	Phenylpropanoids and polyketides	Flavonoids	Flavonoid glycosides
Glyma.06G203400	M594T802_1_POS	0.524067	0.0255849	glutaminyl-tRNA synthetase (QARS, glnS)	pheophorbide a
Glyma.06G203400	M595T396_POS	-0.541727	0.0202258	glutaminyl-tRNA synthetase (QARS, glnS)	Kaempferol-3-O-rutinoside	Phenylpropanoids and polyketides	Flavonoids	Flavonoid glycosides
Glyma.06G203400	M595T512_POS	-0.599788	0.00850879	glutaminyl-tRNA synthetase (QARS, glnS)	Didymin	Phenylpropanoids and polyketides	Flavonoids	Flavonoid glycosides
Glyma.06G203400	M596T435_POS	-0.536881	0.0215992	glutaminyl-tRNA synthetase (QARS, glnS)	Antirrhinin	Phenylpropanoids and polyketides	Flavonoids	Flavonoid glycosides
Glyma.06G203400	M597T621_NEG	0.569042	0.0137159	glutaminyl-tRNA synthetase (QARS, glnS)	5-Oxo-delta-bilirubin	Organoheterocyclic compounds	Tetrapyrroles and derivatives	NA
Glyma.06G203400	M607T920_POS	0.538157	0.0212306	glutaminyl-tRNA synthetase (QARS, glnS)	Phaeophorbide b	Organoheterocyclic compounds	Tetrapyrroles and derivatives	Chlorins
Glyma.06G203400	M609T68_NEG	0.504694	0.0326736	glutaminyl-tRNA synthetase (QARS, glnS)	Neohesperidin	Phenylpropanoids and polyketides	Flavonoids	Flavonoid glycosides
Glyma.06G203400	M611T405_NEG	-0.5102	0.030521	glutaminyl-tRNA synthetase (QARS, glnS)	Glutathione disulfide	Organic acids and derivatives	Carboxylic acids and derivatives	Amino acids, peptides, and analogues
Glyma.06G203400	M611T405_POS	-0.563418	0.0148968	glutaminyl-tRNA synthetase (QARS, glnS)	Kaempferol 3-O-sophoroside	Phenylpropanoids and polyketides	Flavonoids	Flavonoid glycosides
Glyma.06G203400	M611T581_NEG	0.574438	0.0126544	glutaminyl-tRNA synthetase (QARS, glnS)	Protochlorophyllide	NA	NA	NA
Glyma.06G203400	M612T405_POS	-0.563918	0.0147887	glutaminyl-tRNA synthetase (QARS, glnS)	Tulipanin	Phenylpropanoids and polyketides	Flavonoids	Flavonoid glycosides
Glyma.06G203400	M613T638_POS	0.560421	0.0155579	glutaminyl-tRNA synthetase (QARS, glnS)	13(1)-Oxo-magnesium-protoporphyrin IX 13-monomethyl ester	Organoheterocyclic compounds	Tetrapyrroles and derivatives	Metallotetrapyrroles
Glyma.06G203400	M615T392_NEG	-0.647216	0.00369043	glutaminyl-tRNA synthetase (QARS, glnS)	3-Vinylbacteriochlorophyllide a	Organoheterocyclic compounds	Tetrapyrroles and derivatives	Metallotetrapyrroles
Glyma.06G203400	M615T485_POS	-0.516972	0.0280261	glutaminyl-tRNA synthetase (QARS, glnS)	6'''-Deamino-6'''-oxoparomomycin II	Organic oxygen compounds	Organooxygen compounds	Carbohydrates and carbohydrate conjugates
Glyma.06G203400	M616T622_POS	-0.513226	0.0293857	glutaminyl-tRNA synthetase (QARS, glnS)	6'''-Deamino-6'''-hydroxyneomycin C	Organic oxygen compounds	Organooxygen compounds	Carbohydrates and carbohydrate conjugates
Glyma.06G203400	M621T636_2_NEG	0.585233	0.0107274	glutaminyl-tRNA synthetase (QARS, glnS)	(+)-Tetrandrine	Lignans, neolignans and related compounds	NA	NA
Glyma.06G203400	M625T390_POS	0.541132	0.0203906	glutaminyl-tRNA synthetase (QARS, glnS)	Bisnorponcitrin	Phenylpropanoids and polyketides	Coumarins and derivatives	Pyranocoumarins
Glyma.06G203400	M625T516_NEG	0.546518	0.0189363	glutaminyl-tRNA synthetase (QARS, glnS)	Vicinin 2	Phenylpropanoids and polyketides	Flavonoids	Flavonoid glycosides
Glyma.06G203400	M625T627_POS	0.563591	0.0148593	glutaminyl-tRNA synthetase (QARS, glnS)	(+-)-Grossamide	Phenylpropanoids and polyketides	2-arylbenzofuran flavonoids
Glyma.06G203400	M626T517_1_NEG	-0.554724	0.0168791	glutaminyl-tRNA synthetase (QARS, glnS)	castasterone-23-O-glucoside
Glyma.06G203400	M626T526_2_POS	0.587044	0.0104285	glutaminyl-tRNA synthetase (QARS, glnS)	Leukotriene C4	Organic acids and derivatives	Carboxylic acids and derivatives	Amino acids, peptides, and analogues
Glyma.06G203400	M627T378_NEG	0.50402	0.0329451	glutaminyl-tRNA synthetase (QARS, glnS)	Primary fluorescent chlorophyll catabolite	Organoheterocyclic compounds	Tetrapyrroles and derivatives	NA
Glyma.06G203400	M636T564_POS	0.586111	0.0105816	glutaminyl-tRNA synthetase (QARS, glnS)	Neoacrimarine D	Phenylpropanoids and polyketides	Neoflavonoids	Prenylated neoflavonoids
Glyma.06G203400	M637T282_NEG	-0.5093	0.0308651	glutaminyl-tRNA synthetase (QARS, glnS)	Isochesnatin	Phenylpropanoids and polyketides	Tannins	Hydrolyzable tannins
Glyma.06G203400	M637T693_POS	-0.563954	0.0147807	glutaminyl-tRNA synthetase (QARS, glnS)	Lanceolitol B7	Organic oxygen compounds	Organooxygen compounds	Carbohydrates and carbohydrate conjugates
Glyma.06G203400	M642T463_NEG	0.539403	0.0208755	glutaminyl-tRNA synthetase (QARS, glnS)	brassinolide-23-O-glucoside
Glyma.06G203400	M651T446_NEG	0.547572	0.0186615	glutaminyl-tRNA synthetase (QARS, glnS)	Citrusoside C	Lipids and lipid-like molecules	Saccharolipids
Glyma.06G203400	M654T511_NEG	0.560085	0.0156336	glutaminyl-tRNA synthetase (QARS, glnS)	Rifamycin W	Phenylpropanoids and polyketides	Macrolactams	NA
Glyma.06G203400	M656T453_NEG	0.502367	0.0336179	glutaminyl-tRNA synthetase (QARS, glnS)	2'''-N-Acetyl-6'''-deamino-6'''-hydroxyneomycin C	Organic oxygen compounds	Organooxygen compounds	Carbohydrates and carbohydrate conjugates
Glyma.06G203400	M675T544_1_POS	-0.641156	0.00413719	glutaminyl-tRNA synthetase (QARS, glnS)	triferuloyl spermidine
Glyma.06G203400	M677T110_NEG	0.553886	0.0170807	glutaminyl-tRNA synthetase (QARS, glnS)	(+)-alpha-Viniferin	Phenylpropanoids and polyketides	2-arylbenzofuran flavonoids
Glyma.06G203400	M696T596_NEG	0.523745	0.0256921	glutaminyl-tRNA synthetase (QARS, glnS)	Rifamycin	Phenylpropanoids and polyketides	Macrolactams	NA
Glyma.06G203400	M705T759_POS	0.598211	0.00872961	glutaminyl-tRNA synthetase (QARS, glnS)	erythromycin D
Glyma.06G203400	M711T219_NEG	-0.546484	0.0189452	glutaminyl-tRNA synthetase (QARS, glnS)	Quercetin 3-(6''-malonylglucoside)-7-glucoside	Phenylpropanoids and polyketides	Flavonoids	Flavonoid glycosides
Glyma.06G203400	M711T466_NEG	0.587342	0.0103801	glutaminyl-tRNA synthetase (QARS, glnS)	2'-O-Glucosylbetanin	Alkaloids and derivatives	Betalains	Betacyanins and derivatives
Glyma.06G203400	M723T627_NEG	-0.509509	0.0307852	glutaminyl-tRNA synthetase (QARS, glnS)	Torvonin A	Lipids and lipid-like molecules	Steroids and steroid derivatives	Steroidal glycosides
Glyma.06G203400	M726T363_1_POS	-0.55443	0.0169498	glutaminyl-tRNA synthetase (QARS, glnS)	molybdopterin adenine dinucleotide
Glyma.06G203400	M728T627_POS	0.58898	0.0101164	glutaminyl-tRNA synthetase (QARS, glnS)	Citrusin III	Organic acids and derivatives	Carboxylic acids and derivatives	Amino acids, peptides, and analogues
Glyma.06G203400	M741T397_NEG	-0.511334	0.0300919	glutaminyl-tRNA synthetase (QARS, glnS)	Narirutin 4'-glucoside	Phenylpropanoids and polyketides	Flavonoids	Flavonoid glycosides
Glyma.06G203400	M741T397_POS	-0.595386	0.00913665	glutaminyl-tRNA synthetase (QARS, glnS)	Kaempferol-3-O-galactoside-6''-rhamnoside-3'''-rha	Phenylpropanoids and polyketides	Flavonoids	Flavonoid glycosides
Glyma.06G203400	M742T397_POS	-0.557685	0.016182	glutaminyl-tRNA synthetase (QARS, glnS)	Pelargonidin 3-rutinoside-5-glucoside	Phenylpropanoids and polyketides	Flavonoids	Flavonoid glycosides
Glyma.06G203400	M757T371_POS	-0.618365	0.00623001	glutaminyl-tRNA synthetase (QARS, glnS)	Kaempferol 3-(2G-glucosylrutinoside)	Phenylpropanoids and polyketides	Flavonoids	Flavonoid glycosides
Glyma.06G203400	M758T371_POS	-0.627408	0.00531567	glutaminyl-tRNA synthetase (QARS, glnS)	Rubrobrassicin
Glyma.06G203400	M795T700_NEG	0.534941	0.022169	glutaminyl-tRNA synthetase (QARS, glnS)	Soyasaponin Bb'	Lipids and lipid-like molecules	Prenol lipids	Terpene glycosides
Glyma.06G203400	M85T62_POS	-0.504126	0.0329021	glutaminyl-tRNA synthetase (QARS, glnS)	1-Methylpyrrolinium	Organoheterocyclic compounds	Pyrrolines	NA
Glyma.06G203400	M865T390_POS	0.558744	0.015938	glutaminyl-tRNA synthetase (QARS, glnS)	Precorrin 2	Organoheterocyclic compounds	Tetrapyrroles and derivatives	NA
Glyma.06G203400	M87T76_NEG	0.571737	0.0131774	glutaminyl-tRNA synthetase (QARS, glnS)	Pyruvic acid	Organic acids and derivatives	Keto acids and derivatives	Alpha-keto acids and derivatives
Glyma.06G203400	M888T396_POS	-0.528034	0.0242944	glutaminyl-tRNA synthetase (QARS, glnS)	Pelargonidin 3-(4'''-p-coumarylrutinoside)-5-glucoside
Glyma.06G203400	M88T77_NEG	0.54086	0.0204664	glutaminyl-tRNA synthetase (QARS, glnS)	Oxamic acid	Organic acids and derivatives	Carboxylic acids and derivatives	Amino acids, peptides, and analogues
Glyma.06G203400	M899T565_NEG	-0.520046	0.0269471	glutaminyl-tRNA synthetase (QARS, glnS)	Lyconoside Ib	Lipids and lipid-like molecules	Steroids and steroid derivatives	Steroidal glycosides
Glyma.06G203400	M901T565_NEG	0.568942	0.0137364	glutaminyl-tRNA synthetase (QARS, glnS)	Abutiloside G	Lipids and lipid-like molecules	Steroids and steroid derivatives	Steroidal glycosides
Glyma.06G203400	M914T550_POS	0.571395	0.0132447	glutaminyl-tRNA synthetase (QARS, glnS)	Soyasaponin II	Lipids and lipid-like molecules	Prenol lipids	Terpene glycosides
Glyma.06G203400	M938T399_3_POS	-0.612003	0.00694652	glutaminyl-tRNA synthetase (QARS, glnS)	(S)-Hydroxydecanoyl-CoA	Lipids and lipid-like molecules	Fatty Acyls	Fatty acyl thioesters
Glyma.06G203400	M951T406_5_POS	-0.616259	0.00646022	glutaminyl-tRNA synthetase (QARS, glnS)	Quercetin 3-(2'''-(E)-caffeylsophoroside]-7-glucoside	Phenylpropanoids and polyketides	Flavonoids	Flavonoid glycosides
Glyma.06G203400	M955T622_NEG	-0.574121	0.012715	glutaminyl-tRNA synthetase (QARS, glnS)	Betavulgaroside III	Lipids and lipid-like molecules	Prenol lipids	Terpene glycosides
Glyma.06G203400	M978T336_7_POS	-0.533122	0.0227141	glutaminyl-tRNA synthetase (QARS, glnS)	Portisin B
Glyma.07G124000	M1028T698_NEG	-0.615035	0.00659713	glutamyl-tRNA synthetase (EARS, gltX)	3-(4'O-Malonyl)Rha(1-2)Gal(1-2)GluA-Soyasaponenol B	Lipids and lipid-like molecules	Prenol lipids	Terpene glycosides
Glyma.07G124000	M1030T697_NEG	-0.637146	0.00445633	glutamyl-tRNA synthetase (EARS, gltX)	Solasodoside A	Lipids and lipid-like molecules	Steroids and steroid derivatives	Steroidal glycosides
Glyma.07G124000	M1031T697_NEG	-0.641038	0.00414633	glutamyl-tRNA synthetase (EARS, gltX)	Dehydrotomatine	Lipids and lipid-like molecules	Steroids and steroid derivatives	Steroidal glycosides
Glyma.07G124000	M1036T687_1_NEG	-0.615825	0.00650847	glutamyl-tRNA synthetase (EARS, gltX)	Abutiloside D	Lipids and lipid-like molecules	Steroids and steroid derivatives	Steroidal glycosides
Glyma.07G124000	M1050T685_NEG	-0.538571	0.0211122	glutamyl-tRNA synthetase (EARS, gltX)	Solanigroside G	Lipids and lipid-like molecules	Steroids and steroid derivatives	Steroidal glycosides
Glyma.07G124000	M110T938_POS	-0.593394	0.00943278	glutamyl-tRNA synthetase (EARS, gltX)	(S)-2-chloropropanoate
Glyma.07G124000	M114T73_POS	0.516997	0.0280172	glutamyl-tRNA synthetase (EARS, gltX)	(S)-1-Pyrroline-5-carboxylate	Organic acids and derivatives	Carboxylic acids and derivatives	Amino acids, peptides, and analogues
Glyma.07G124000	M123T63_POS	0.506288	0.0320389	glutamyl-tRNA synthetase (EARS, gltX)	Polysulfide
Glyma.07G124000	M125T937_POS	0.529856	0.0237188	glutamyl-tRNA synthetase (EARS, gltX)	3-chloro-L-alanine
Glyma.07G124000	M138T295_POS	-0.656031	0.00311179	glutamyl-tRNA synthetase (EARS, gltX)	4-Aminobenzoate	Benzenoids	Benzene and substituted derivatives	Benzoic acids and derivatives
Glyma.07G124000	M151T74_POS	0.521051	0.0266016	glutamyl-tRNA synthetase (EARS, gltX)	Bis(1-methylethyl) disulfide	Organosulfur compounds	Organic disulfides	Dialkyldisulfides
Glyma.07G124000	M151T762_POS	-0.645132	0.00383937	glutamyl-tRNA synthetase (EARS, gltX)	Thymol	Lipids and lipid-like molecules	Prenol lipids	Monoterpenoids
Glyma.07G124000	M157T938_POS	-0.601854	0.00822636	glutamyl-tRNA synthetase (EARS, gltX)	2-Phosphoglycolate	Organic acids and derivatives	Organic phosphoric acids and derivatives	Phosphate esters
Glyma.07G124000	M169T761_POS	-0.648703	0.00358714	glutamyl-tRNA synthetase (EARS, gltX)	6-Hydroxy-2,6-dimethyl-2,7-octadien-4-one	Lipids and lipid-like molecules	Prenol lipids	Monoterpenoids
Glyma.07G124000	M171T390_NEG	-0.619287	0.0061313	glutamyl-tRNA synthetase (EARS, gltX)	1,4-Cyclohexanedicarboxylic acid	Organic acids and derivatives	Carboxylic acids and derivatives	Dicarboxylic acids and derivatives
Glyma.07G124000	M172T390_NEG	-0.606233	0.00765266	glutamyl-tRNA synthetase (EARS, gltX)	5-Guanidino-2-oxopentanoate	Organic acids and derivatives	Keto acids and derivatives	Short-chain keto acids and derivatives
Glyma.07G124000	M187T1029_POS	0.501425	0.0340061	glutamyl-tRNA synthetase (EARS, gltX)	iodoacetate
Glyma.07G124000	M187T69_POS	-0.580555	0.0115314	glutamyl-tRNA synthetase (EARS, gltX)	3-maleylpyruvate
Glyma.07G124000	M191T595_POS	-0.700676	0.00120027	glutamyl-tRNA synthetase (EARS, gltX)	beta-Damascenone	Organic oxygen compounds	Organooxygen compounds	Carbonyl compounds
Glyma.07G124000	M193T806_POS	-0.65995	0.00287967	glutamyl-tRNA synthetase (EARS, gltX)	Vitispirane	Organoheterocyclic compounds	Tetrahydrofurans
Glyma.07G124000	M199T446_POS	-0.729048	0.000597868	glutamyl-tRNA synthetase (EARS, gltX)	Hercynine	Organic acids and derivatives	Carboxylic acids and derivatives	Amino acids, peptides, and analogues
Glyma.07G124000	M205T928_NEG	0.545944	0.0190873	glutamyl-tRNA synthetase (EARS, gltX)	3-Oxalomalate	Organic acids and derivatives	Carboxylic acids and derivatives	Tricarboxylic acids and derivatives
Glyma.07G124000	M207T711_POS	-0.579494	0.0117202	glutamyl-tRNA synthetase (EARS, gltX)	Etrogol	Benzenoids	Phenols	Tyrosols and derivatives
Glyma.07G124000	M215T194_POS	-0.505985	0.0321589	glutamyl-tRNA synthetase (EARS, gltX)	Dethiobiotin	Lipids and lipid-like molecules	Fatty Acyls	Fatty acids and conjugates
Glyma.07G124000	M232T70_NEG	-0.550455	0.0179261	glutamyl-tRNA synthetase (EARS, gltX)	2,3-Dihydro-3-hydroxy-3-methylthiazolo[3,2-a]indole-9-carboxaldehyde	Organoheterocyclic compounds	Indoles and derivatives	Indoles
Glyma.07G124000	M237T724_POS	-0.588136	0.0102516	glutamyl-tRNA synthetase (EARS, gltX)	Aubergenone	Lipids and lipid-like molecules	Prenol lipids	Sesquiterpenoids
Glyma.07G124000	M238T70_POS	-0.648453	0.0036043	glutamyl-tRNA synthetase (EARS, gltX)	S-succinylcysteine	Organic acids and derivatives	Carboxylic acids and derivatives	Amino acids, peptides, and analogues
Glyma.07G124000	M252T98_POS	-0.544433	0.0194892	glutamyl-tRNA synthetase (EARS, gltX)	Deoxyadenosine	Nucleosides, nucleotides, and analogues	Purine nucleosides	Purine 2'-deoxyribonucleosides
Glyma.07G124000	M258T660_POS	-0.625766	0.00547302	glutamyl-tRNA synthetase (EARS, gltX)	Norcraugsodine	Benzenoids	Phenols	Benzenediols
Glyma.07G124000	M265T285_POS	0.543157	0.0198339	glutamyl-tRNA synthetase (EARS, gltX)	Feruloylputrescine	Phenylpropanoids and polyketides	Cinnamic acids and derivatives	Hydroxycinnamic acids and derivatives
Glyma.07G124000	M267T518_POS	0.577422	0.0120962	glutamyl-tRNA synthetase (EARS, gltX)	3,14-Dihydroxy-11,13-dihydrocostunolide	Lipids and lipid-like molecules	Prenol lipids	Terpene lactones
Glyma.07G124000	M269T389_NEG	-0.652894	0.00330854	glutamyl-tRNA synthetase (EARS, gltX)	4',6,7-Trihydroxyisoflavone	Phenylpropanoids and polyketides	Isoflavonoids	Isoflav-2-enes
Glyma.07G124000	M269T661_POS	-0.562979	0.014992	glutamyl-tRNA synthetase (EARS, gltX)	1-Hydroxytorilolone	Lipids and lipid-like molecules	Prenol lipids	Sesquiterpenoids
Glyma.07G124000	M273T639_POS	-0.623192	0.00572729	glutamyl-tRNA synthetase (EARS, gltX)	Naringenin chalcone	Phenylpropanoids and polyketides	Linear 1,3-diarylpropanoids	Chalcones and dihydrochalcones
Glyma.07G124000	M277T796_POS	-0.550565	0.0178985	glutamyl-tRNA synthetase (EARS, gltX)	Dehydrocrepenynic acid	Lipids and lipid-like molecules	Fatty Acyls	Fatty acids and conjugates
Glyma.07G124000	M279T781_POS	-0.53114	0.0233199	glutamyl-tRNA synthetase (EARS, gltX)	?-linolenic acid	Lipids and lipid-like molecules	Fatty Acyls	Lineolic acids and derivatives
Glyma.07G124000	M287T471_NEG	0.500152	0.034536	glutamyl-tRNA synthetase (EARS, gltX)	3-deoxy-D-arabino-heptulosonate 7-phosphate
Glyma.07G124000	M287T811_POS	-0.63543	0.00459891	glutamyl-tRNA synthetase (EARS, gltX)	Retinol	Lipids and lipid-like molecules	Prenol lipids	Retinoids
Glyma.07G124000	M291T743_POS	-0.582096	0.0112613	glutamyl-tRNA synthetase (EARS, gltX)	Deoxy phytoprostane J1	Lipids and lipid-like molecules	Fatty Acyls	Eicosanoids
Glyma.07G124000	M295T796_POS	-0.5425	0.0200131	glutamyl-tRNA synthetase (EARS, gltX)	Colneleic acid	Lipids and lipid-like molecules	Fatty Acyls	Fatty acids and conjugates
Glyma.07G124000	M302T722_POS	-0.644774	0.00386544	glutamyl-tRNA synthetase (EARS, gltX)	CIF 3
Glyma.07G124000	M303T888_POS	-0.504549	0.032732	glutamyl-tRNA synthetase (EARS, gltX)	(3R,4R)-3-(6-hydroxy-1,3-benzodioxol-5-yl)-3,4-dihydro-2H-chromene-4,7-diol
Glyma.07G124000	M305T814_POS	-0.704024	0.00111004	glutamyl-tRNA synthetase (EARS, gltX)	3-Acetoxy-9-heptadecene-4,6-diyn-8-ol.	Lipids and lipid-like molecules	Fatty Acyls	Fatty alcohol esters
Glyma.07G124000	M313T734_NEG	-0.61616	0.00647118	glutamyl-tRNA synthetase (EARS, gltX)	12,13-DHOME	Lipids and lipid-like molecules	Fatty Acyls	Fatty acids and conjugates
Glyma.07G124000	M321T683_POS	-0.535929	0.0218775	glutamyl-tRNA synthetase (EARS, gltX)	MMV687706	Benzenoids	Benzene and substituted derivatives	Diphenylethers
Glyma.07G124000	M321T870_POS	-0.558869	0.0159095	glutamyl-tRNA synthetase (EARS, gltX)	Anomallotusin
Glyma.07G124000	M322T702_NEG	-0.60677	0.00758466	glutamyl-tRNA synthetase (EARS, gltX)	(-)-Jasmonoyl-L-isoleucine	Organic acids and derivatives	Carboxylic acids and derivatives	Amino acids, peptides, and analogues
Glyma.07G124000	M329T783_POS	-0.555076	0.016795	glutamyl-tRNA synthetase (EARS, gltX)	(4Z,7Z,10Z,13Z,16Z,19Z)-Docosahexaenoic acid	Lipids and lipid-like molecules	Fatty Acyls	Fatty acids and conjugates
Glyma.07G124000	M331T724_POS	-0.678591	0.00196116	glutamyl-tRNA synthetase (EARS, gltX)	(7Z,10Z,13Z,16Z,19Z)-Docosapentaenoic acid	Lipids and lipid-like molecules	Fatty Acyls	Fatty acids and conjugates
Glyma.07G124000	M338T700_POS	-0.699897	0.00122213	glutamyl-tRNA synthetase (EARS, gltX)	5-Hydroxymethyldeoxycytidylate	Nucleosides, nucleotides, and analogues	Pyrimidine nucleotides	Pyrimidine deoxyribonucleotides
Glyma.07G124000	M345T861_POS	-0.558656	0.0159582	glutamyl-tRNA synthetase (EARS, gltX)	SB 205607	Organoheterocyclic compounds	Quinolines and derivatives	Phenylquinolines
Glyma.07G124000	M346T860_POS	-0.50776	0.0314609	glutamyl-tRNA synthetase (EARS, gltX)	cyclic pyranopterin phosphate
Glyma.07G124000	M347T786_POS	-0.858372	5.16894e-06	glutamyl-tRNA synthetase (EARS, gltX)	Corticosterone	Lipids and lipid-like molecules	Steroids and steroid derivatives	Hydroxysteroids
Glyma.07G124000	M356T767_POS	0.619473	0.00611155	glutamyl-tRNA synthetase (EARS, gltX)	Arachidoyl Ethanolamide	Organic nitrogen compounds	Organonitrogen compounds	Amines
Glyma.07G124000	M363T910_POS	-0.505197	0.0324723	glutamyl-tRNA synthetase (EARS, gltX)	3,6,9,12-Tetraoxatetracosan-1-ol	Organic oxygen compounds	Organooxygen compounds	Ethers
Glyma.07G124000	M363T922_NEG	-0.735661	0.000502091	glutamyl-tRNA synthetase (EARS, gltX)	XMP
Glyma.07G124000	M384T368_NEG	0.556967	0.0163488	glutamyl-tRNA synthetase (EARS, gltX)	Buntanmine A	Organoheterocyclic compounds	Quinolines and derivatives	Benzoquinolines
Glyma.07G124000	M391T699_NEG	-0.624237	0.00562298	glutamyl-tRNA synthetase (EARS, gltX)	5-O-Demethylnobiletin
Glyma.07G124000	M430T906_POS	-0.504997	0.0325524	glutamyl-tRNA synthetase (EARS, gltX)	15alpha-Hydroxysolasodine	Lipids and lipid-like molecules	Steroids and steroid derivatives	Steroidal alkaloids
Glyma.07G124000	M456T345_NEG	0.532252	0.0229785	glutamyl-tRNA synthetase (EARS, gltX)	Amygdalin	Organic oxygen compounds	Organooxygen compounds	Carbohydrates and carbohydrate conjugates
Glyma.07G124000	M457T870_POS	-0.616641	0.00641789	glutamyl-tRNA synthetase (EARS, gltX)	Oleanolic acid	Lipids and lipid-like molecules	Prenol lipids	Triterpenoids
Glyma.07G124000	M463T486_POS	-0.504072	0.0329241	glutamyl-tRNA synthetase (EARS, gltX)	Peonidin-3-O-beta-galactoside	Phenylpropanoids and polyketides	Flavonoids	Flavonoid glycosides
Glyma.07G124000	M471T243_NEG	-0.528535	0.0241351	glutamyl-tRNA synthetase (EARS, gltX)	Hassmarin	Phenylpropanoids and polyketides	Coumarins and derivatives	Pyranocoumarins
Glyma.07G124000	M483T518_POS	0.557563	0.01621	glutamyl-tRNA synthetase (EARS, gltX)	Gentamicin X2	Organic oxygen compounds	Organooxygen compounds	Carbohydrates and carbohydrate conjugates
Glyma.07G124000	M485T905_POS	0.533328	0.0226518	glutamyl-tRNA synthetase (EARS, gltX)	6',7'-Dihydroxybergamottin octanal acetal	Phenylpropanoids and polyketides	Coumarins and derivatives	Furanocoumarins
Glyma.07G124000	M575T466_POS	0.593375	0.00943569	glutamyl-tRNA synthetase (EARS, gltX)	Stigmasterol-3-O-beta-D-glucopyranoside	Lipids and lipid-like molecules	Steroids and steroid derivatives	Stigmastanes and derivatives
Glyma.07G124000	M600T447_2_POS	-0.561438	0.0153311	glutamyl-tRNA synthetase (EARS, gltX)	5'''-epi-Lividomycin B	Organic oxygen compounds	Organooxygen compounds	Carbohydrates and carbohydrate conjugates
Glyma.07G124000	M613T608_NEG	-0.54463	0.0194366	glutamyl-tRNA synthetase (EARS, gltX)	Neomycin B	Organic oxygen compounds	Organooxygen compounds	Carbohydrates and carbohydrate conjugates
Glyma.07G124000	M640T413_POS	-0.569227	0.0136784	glutamyl-tRNA synthetase (EARS, gltX)	Demethyl-desacetyl-rifamycin S	Phenylpropanoids and polyketides	Macrolactams	NA
Glyma.07G124000	M663T414_NEG	-0.543664	0.0196964	glutamyl-tRNA synthetase (EARS, gltX)	NAD+	Nucleosides, nucleotides, and analogues	(5'->5')-dinucleotides	NA
Glyma.07G124000	M663T682_POS	0.564386	0.014688	glutamyl-tRNA synthetase (EARS, gltX)	Prosapogenin	Lipids and lipid-like molecules	Prenol lipids	Terpene glycosides
Glyma.07G124000	M883T701_NEG	-0.62733	0.00532309	glutamyl-tRNA synthetase (EARS, gltX)	Pennogenin 3-O-beta-chacotrioside	Lipids and lipid-like molecules	Steroids and steroid derivatives	Steroidal glycosides
Glyma.07G124000	M894T716_POS	0.522345	0.0261617	glutamyl-tRNA synthetase (EARS, gltX)	chlorophyll a
Glyma.07G124000	M913T695_NEG	-0.619174	0.00614329	glutamyl-tRNA synthetase (EARS, gltX)	Abutiloside H	Lipids and lipid-like molecules	Steroids and steroid derivatives	Steroidal glycosides
Glyma.07G124000	M915T695_NEG	-0.585743	0.0106426	glutamyl-tRNA synthetase (EARS, gltX)	Abutiloside B	Lipids and lipid-like molecules	Steroids and steroid derivatives	Steroidal glycosides
Glyma.07G124000	M974T533_3_POS	-0.737647	0.000475972	glutamyl-tRNA synthetase (EARS, gltX)	Sinapoyl-CoA	Lipids and lipid-like molecules	Fatty Acyls	Fatty acyl thioesters
Glyma.10G272800	M106T70_POS	-0.516187	0.0283067	glutaminyl-tRNA synthetase (QARS, glnS)	L-Serine	Organic acids and derivatives	Carboxylic acids and derivatives	Amino acids, peptides, and analogues
Glyma.10G272800	M113T68_NEG	-0.505245	0.0324532	glutaminyl-tRNA synthetase (QARS, glnS)	2-Hydroxy-2,4-pentadienoate	Lipids and lipid-like molecules	Fatty Acyls	Fatty acids and conjugates
Glyma.10G272800	M138T295_POS	-0.57337	0.0128592	glutaminyl-tRNA synthetase (QARS, glnS)	4-Aminobenzoate	Benzenoids	Benzene and substituted derivatives	Benzoic acids and derivatives
Glyma.10G272800	M169T761_POS	-0.556145	0.0165417	glutaminyl-tRNA synthetase (QARS, glnS)	6-Hydroxy-2,6-dimethyl-2,7-octadien-4-one	Lipids and lipid-like molecules	Prenol lipids	Monoterpenoids
Glyma.10G272800	M187T69_POS	-0.503523	0.0331463	glutaminyl-tRNA synthetase (QARS, glnS)	3-maleylpyruvate
Glyma.10G272800	M191T595_POS	-0.650219	0.00348422	glutaminyl-tRNA synthetase (QARS, glnS)	beta-Damascenone	Organic oxygen compounds	Organooxygen compounds	Carbonyl compounds
Glyma.10G272800	M193T806_POS	-0.57101	0.0133209	glutaminyl-tRNA synthetase (QARS, glnS)	Vitispirane	Organoheterocyclic compounds	Tetrahydrofurans
Glyma.10G272800	M199T446_POS	-0.517531	0.0278273	glutaminyl-tRNA synthetase (QARS, glnS)	Hercynine	Organic acids and derivatives	Carboxylic acids and derivatives	Amino acids, peptides, and analogues
Glyma.10G272800	M201T74_POS	-0.503047	0.0333399	glutaminyl-tRNA synthetase (QARS, glnS)	D-erythrose 4-phosphate
Glyma.10G272800	M207T711_POS	-0.51551	0.0285509	glutaminyl-tRNA synthetase (QARS, glnS)	Etrogol	Benzenoids	Phenols	Tyrosols and derivatives
Glyma.10G272800	M223T934_POS	0.646043	0.00377368	glutaminyl-tRNA synthetase (QARS, glnS)	1,2-Diphenyl-2-buten-1-one	Phenylpropanoids and polyketides	Stilbenes
Glyma.10G272800	M237T724_POS	-0.505656	0.0322893	glutaminyl-tRNA synthetase (QARS, glnS)	Aubergenone	Lipids and lipid-like molecules	Prenol lipids	Sesquiterpenoids
Glyma.10G272800	M238T70_POS	-0.500053	0.0345774	glutaminyl-tRNA synthetase (QARS, glnS)	S-succinylcysteine	Organic acids and derivatives	Carboxylic acids and derivatives	Amino acids, peptides, and analogues
Glyma.10G272800	M247T932_POS	-0.551901	0.0175658	glutaminyl-tRNA synthetase (QARS, glnS)	Geranylhydroquinone	Lipids and lipid-like molecules	Prenol lipids	Quinone and hydroquinone lipids
Glyma.10G272800	M252T98_POS	-0.551503	0.0176645	glutaminyl-tRNA synthetase (QARS, glnS)	Deoxyadenosine	Nucleosides, nucleotides, and analogues	Purine nucleosides	Purine 2'-deoxyribonucleosides
Glyma.10G272800	M258T660_POS	-0.622093	0.00583871	glutaminyl-tRNA synthetase (QARS, glnS)	Norcraugsodine	Benzenoids	Phenols	Benzenediols
Glyma.10G272800	M279T839_POS	-0.54251	0.0200104	glutaminyl-tRNA synthetase (QARS, glnS)	Di-n-butyl phthalate	Benzenoids	Benzene and substituted derivatives	Benzoic acids and derivatives
[truncated: 2,665 more rows]
