# Supplementary material for: GRF5 mediates circadian clock to gate seed quality in soybean
Source: Research Square preprint supplement (doi:10.21203/rs.3.rs-5535877/v1), 2025-03-05
Supplement: Supplementary file 8 [file fc556a8d523f34e300a01f06.xlsx]

## Sheet: Sheet1
15 groups according to KEGG BRITE hierarchy, https://www.kegg.jp/entry/gmx00970
Classification	KEGG BRITE: Pathways
Transcription	Transcription, Spliceosome, Transcription machinery, RNA transport, mRNA surveillance pathway, RNA degradation, RNA polymerase
Environmental adaptation	Environmental adaptation, Plant-pathogen interaction, Circadian
Protein synthesis	Translation factors, Ribosome biogenesis, Translation factors, AA metabolism, Transfer RNA biogenesis, Aminoacyl-tRNA biosynthesis, mRNA surveillance pathway
Protein processing	Protein processing, Protein export, Chaperones and folding catalysts
Amino acid metabolism	Amino acid metabolism, Amino acid related enzymes
Lipid synthesis	Fatty acid biosynthesis, Fatty acid elongation, Biosynthesis of unsaturated fatty acids
Core metabolism	Porphyrin and chlorophyll metabolism, Carbon fixation in photosynthetic organisms; Glyoxylate and dicarboxylate metabolism; Fructose and mannose metabolism; Pentose phosphate pathway, Photosynthesis proteins; Photosynthesis, Photosynthesis-antenna proteins
Photosynthesis	Porphyrin and chlorophyll metabolism, Carbon fixation in photosynthetic organisms; Glyoxylate and dicarboxylate metabolism; Fructose and mannose metabolism; Pentose phosphate pathway, Photosynthesis proteins; Photosynthesis, Photosynthesis-antenna proteins
Protein metabolism	Proteasome, Phagosome, Ubiquitin mediated proteolysis, Peptidases and inhibitors, Autophagy-other
Lipid metabolism	Linoleic acid metabolism, alpha-Linolenic acid metabolism, Arachidonic acid metabolism, Fatty acid degradation, Cutin, suberine and wax biosynthesis, Steroid biosynthesis, Primary bile acid biosynthesis, Secondary bile acid biosynthesis, Steroid hormone biosynthesis, Glycerolipid metabolism, Glycerophospholipid metabolism, Ether lipid metabolism, C5-Branched dibasic acid metabolism, Sphingolipid …
Replication and repair	DNA repair and recombination proteins, Nucleotide excision repair, Mismatch repair, Homologous recombination, Non-homologous recombination, Fanconi anemia pathway
Nucleotide metabolism	Nucleotide metabolism, Pyrimidine metabolism, Purine metabolism
Secondary metabolism	Enzymes with EC numbers, Ascorbate and aldarate metabolism, Limonene and pinene degradation, Metabolism of cofactors and vitamins, Carotenoid biosynthesis, Phenylpropanoid biosynthesis, Stilbenoid, diarylheptanoid and gingerol biosynthesis, Flavonoid biosynthesis, Flavone and flavonol biosynthesis, Anthocyanin biosynthesis, Isoflavonoid biosynthesis, Degradation of flavonoids, Indole alkaloid bio…
Nutrient metabolism	Sulfur relay system, Nitrogen metabolism
Signalling	MAPK signaling pathway, Protein kinases, Protein phosphatases and associated proteins, Signaling proteins, Transporters, Two-component system, Cytoskeleton proteins, GTP-binding proteins
