# Supplementary material for: GRF5 mediates circadian clock to gate seed quality in soybean
Source: Research Square preprint supplement (doi:10.21203/rs.3.rs-5535877/v1), 2025-03-05
Supplement: Supplementary file 9 [file fd0aed7a9752f155f91c940f.xlsx]

## Sheet: WS82-Up
Cluster	ID	Description	GeneRatio	BgRatio	pvalue	p.adjust	qvalue	geneID	Count
0 h	03009	Ribosome biogenesis	281/4234	469/14423	2.33002e-44	3.89113e-42	3.06582e-42	Glyma.02G205600/Glyma.14G013102/Glyma.17G072400/Glyma.19G110900/Glyma.13G107200/Glyma.15G056100/Glyma.04G200700/Glyma.08G173300/Glyma.10G022600/Glyma.10G200300/Glyma.16G041400/Glyma.19G186600/Glyma.08G176900/Glyma.17G128400/Glyma.09G023100/Glyma.18G020000/Glyma.04G069900/Glyma.09G104000/Glyma.12G028500/Glyma.15G254100/Glyma.07G032500/Glyma.20G190200/Glyma.05G046400/Glyma.02G151500/Glyma.16G071100…	281		Up-regulated' means that gene expressions were increased in seeds, compared to pod walls
0 h	03008	Ribosome biogenesis in eukaryotes	97/4234	147/14423	3.03756e-20	2.53636e-18	1.99839e-18	Glyma.19G110900/Glyma.15G056100/Glyma.04G200700/Glyma.10G022600/Glyma.16G041400/Glyma.19G186600/Glyma.08G176900/Glyma.17G128400/Glyma.18G020000/Glyma.07G032500/Glyma.05G046400/Glyma.02G151500/Glyma.16G071100/Glyma.11G237200/Glyma.11G114300/Glyma.09G084600/Glyma.07G261900/Glyma.19G165900/Glyma.17G088200/Glyma.14G024600/Glyma.04G139900/Glyma.17G115400/Glyma.17G083500/Glyma.11G152600/Glyma.14G196700…	97
0 h	03032	DNA replication proteins	129/4234	221/14423	1.60887e-19	8.95604e-18	7.05644e-18	Glyma.11G184100/Glyma.13G031500/Glyma.14G154200/Glyma.11G070700/Glyma.09G258700/Glyma.12G088300/Glyma.04G246600/Glyma.18G157402/Glyma.04G071600/Glyma.08G310900/Glyma.06G116100/Glyma.15G276000/Glyma.03G161300/Glyma.19G110900/Glyma.13G122100/Glyma.15G056100/Glyma.03G219200/Glyma.06G043900/Glyma.10G035700/Glyma.17G104000/Glyma.17G111300/Glyma.09G047300/Glyma.04G043600/Glyma.04G133700/Glyma.10G268100…	129		The top 50 enriched KEGG pathways showed here.
0 h	09124	Replication and repair	121/4234	241/14423	5.97539e-12	2.49472e-10	1.96559e-10	Glyma.11G184100/Glyma.11G070700/Glyma.12G088300/Glyma.18G157402/Glyma.03G161300/Glyma.02G261800/Glyma.03G219200/Glyma.17G104000/Glyma.09G047300/Glyma.10G278800/Glyma.17G035000/Glyma.19G216100/Glyma.18G067800/Glyma.11G113300/Glyma.17G078700/Glyma.09G189100/Glyma.13G220400/Glyma.04G248900/Glyma.07G238400/Glyma.14G133400/Glyma.13G366800/Glyma.05G129700/Glyma.02G286600/Glyma.06G310500/Glyma.15G154900…	121
0 h	03012	Translation factors	123/4234	247/14423	8.16462e-12	2.72698e-10	2.14858e-10	Glyma.02G276600/Glyma.09G275000/Glyma.13G073200/Glyma.09G046000/Glyma.16G001900/Glyma.03G150600/Glyma.01G054000/Glyma.13G194000/Glyma.05G114900/Glyma.18G107500/Glyma.04G080800/Glyma.08G167900/Glyma.04G195100/Glyma.06G170900/Glyma.06G082500/Glyma.12G165301/Glyma.03G002400/Glyma.19G153200/Glyma.18G024800/Glyma.19G052400/Glyma.18G133400/Glyma.08G114800/Glyma.14G039100/Glyma.07G273500/Glyma.08G170000…	123
0 h	03030	DNA replication	55/4234	87/14423	5.58286e-11	1.5539e-09	1.22431e-09	Glyma.11G070700/Glyma.18G157402/Glyma.03G219200/Glyma.17G104000/Glyma.09G047300/Glyma.10G278800/Glyma.17G035000/Glyma.19G216100/Glyma.18G067800/Glyma.11G113300/Glyma.17G078700/Glyma.04G248900/Glyma.07G238400/Glyma.14G133400/Glyma.05G129700/Glyma.02G286600/Glyma.06G310500/Glyma.15G154900/Glyma.05G020600/Glyma.18G009300/Glyma.13G156400/Glyma.17G130800/Glyma.12G039200/Glyma.08G084400/Glyma.08G079500…	55
0 h	03013	RNA transport	124/4234	271/14423	6.14577e-09	1.46621e-07	1.15522e-07	Glyma.19G188700/Glyma.16G160800/Glyma.13G148200/Glyma.04G074200/Glyma.01G224700/Glyma.20G171200/Glyma.16G071100/Glyma.05G114900/Glyma.14G051300/Glyma.06G041700/Glyma.04G040700/Glyma.02G206900/Glyma.15G010000/Glyma.17G071100/Glyma.13G363900/Glyma.02G266200/Glyma.13G232100/Glyma.03G002400/Glyma.18G024800/Glyma.19G052400/Glyma.18G133400/Glyma.15G097500/Glyma.06G075300/Glyma.19G240700/Glyma.08G172000…	124
0 h	03040	Spliceosome	135/4234	310/14423	5.78731e-08	1.2081e-06	9.51861e-07	Glyma.02G205600/Glyma.17G072400/Glyma.12G239000/Glyma.20G084000/Glyma.04G208600/Glyma.17G063100/Glyma.17G115400/Glyma.14G196700/Glyma.14G025900/Glyma.07G130900/Glyma.03G152100/Glyma.03G143400/Glyma.15G097500/Glyma.02G288900/Glyma.07G205500/Glyma.07G252700/Glyma.05G127900/Glyma.02G229800/Glyma.18G266500/Glyma.05G149300/Glyma.20G204200/Glyma.19G082500/Glyma.15G216300/Glyma.19G114900/Glyma.19G101600…	135
0 h	03051	03051	78/4234	164/14423	5.87013e-07	1.08924e-05	8.58207e-06	Glyma.02G205600/Glyma.17G072400/Glyma.06G236100/Glyma.01G055500/Glyma.18G072700/Glyma.08G013300/Glyma.08G223800/Glyma.05G206400/Glyma.13G031200/Glyma.17G252100/Glyma.14G071000/Glyma.07G155700/Glyma.05G079000/Glyma.10G279900/Glyma.14G011600/Glyma.18G297400/Glyma.04G247000/Glyma.10G295600/Glyma.02G187100/Glyma.10G106100/Glyma.08G048800/Glyma.04G077400/Glyma.17G253600/Glyma.18G206200/Glyma.04G249300…	78
0 h	03430	Mismatch repair	38/4234	65/14423	9.46223e-07	1.58019e-05	1.24503e-05	Glyma.11G070700/Glyma.10G278800/Glyma.18G067800/Glyma.17G078700/Glyma.09G189100/Glyma.04G248900/Glyma.14G133400/Glyma.05G020600/Glyma.07G100600/Glyma.01G158400/Glyma.07G087700/Glyma.17G130800/Glyma.08G079500/Glyma.17G202200/Glyma.08G334900/Glyma.08G120900/Glyma.12G096100/Glyma.20G111700/Glyma.17G121400/Glyma.05G014200/Glyma.05G163700/Glyma.06G155300/Glyma.09G213500/Glyma.12G206200/Glyma.05G124300…	38
0 h	03440	Homologous recombination	47/4234	90/14423	4.32121e-06	6.56039e-05	5.16892e-05	Glyma.02G261800/Glyma.10G278800/Glyma.17G078700/Glyma.13G220400/Glyma.14G133400/Glyma.05G020600/Glyma.13G010700/Glyma.10G014100/Glyma.08G079500/Glyma.15G092000/Glyma.17G202200/Glyma.U027200/Glyma.20G111700/Glyma.05G014200/Glyma.13G363400/Glyma.06G155300/Glyma.09G213500/Glyma.09G070600/Glyma.12G206200/Glyma.13G115000/Glyma.02G013500/Glyma.05G124300/Glyma.09G103100/Glyma.01G030600/Glyma.12G029200/G…	47
0 h	03050	Proteasome	52/4234	105/14423	1.02526e-05	0.000142682	0.000112419	Glyma.13G031200/Glyma.17G252100/Glyma.14G071000/Glyma.07G155700/Glyma.05G079000/Glyma.10G279900/Glyma.10G295600/Glyma.08G048800/Glyma.04G077400/Glyma.17G253600/Glyma.18G206200/Glyma.04G249300/Glyma.11G199900/Glyma.09G161300/Glyma.08G286200/Glyma.04G078200/Glyma.20G109600/Glyma.03G170600/Glyma.14G073000/Glyma.18G050900/Glyma.20G245500/Glyma.17G127100/Glyma.04G181200/Glyma.06G021600/Glyma.18G029800…	52
0 h	03400	DNA repair and recombination proteins	172/4234	448/14423	1.90407e-05	0.000244599	0.000192719	Glyma.11G184100/Glyma.11G070700/Glyma.12G088300/Glyma.18G157402/Glyma.03G161300/Glyma.02G261800/Glyma.10G029000/Glyma.03G129500/Glyma.10G278800/Glyma.20G224100/Glyma.18G067800/Glyma.18G048400/Glyma.17G078700/Glyma.09G264000/Glyma.09G189100/Glyma.03G211900/Glyma.13G220400/Glyma.19G243600/Glyma.18G228000/Glyma.04G248900/Glyma.14G133400/Glyma.13G366800/Glyma.05G020600/Glyma.13G010700/Glyma.10G014100…	172
0 h	00300	Lysine biosynthesis	15/4234	20/14423	3.19009e-05	0.000380532	0.00029982	Glyma.16G028900/Glyma.08G063500/Glyma.09G268200/Glyma.07G060300/Glyma.05G240700/Glyma.18G221700/Glyma.03G181200/Glyma.08G047800/Glyma.07G185700/Glyma.19G182000/Glyma.05G151100/Glyma.08G107800/Glyma.02G066100/Glyma.19G174300/Glyma.03G173400	15
0 h	09121	Transcription	174/4234	465/14423	8.7764e-05	0.000977106	0.00076986	Glyma.02G205600/Glyma.17G050400/Glyma.17G072400/Glyma.03G129500/Glyma.12G239000/Glyma.03G178900/Glyma.20G084000/Glyma.18G281100/Glyma.04G208600/Glyma.17G063100/Glyma.17G115400/Glyma.09G016100/Glyma.14G196700/Glyma.14G025900/Glyma.18G075300/Glyma.02G035900/Glyma.18G179600/Glyma.07G220900/Glyma.07G130900/Glyma.18G212300/Glyma.01G029400/Glyma.03G152100/Glyma.03G143400/Glyma.15G097500/Glyma.02G288900…	174
0 h	04812	Cytoskeleton proteins	122/4234	311/14423	0.000103613	0.0010205	0.00080405	Glyma.11G253200/Glyma.18G180900/Glyma.08G106400/Glyma.15G150100/Glyma.03G237700/Glyma.19G235300/Glyma.17G123400/Glyma.12G191000/Glyma.10G154200/Glyma.09G136400/Glyma.05G149700/Glyma.10G182800/Glyma.11G052200/Glyma.08G054000/Glyma.08G174300/Glyma.08G041200/Glyma.20G159200/Glyma.15G063200/Glyma.01G190000/Glyma.07G209300/Glyma.19G137500/Glyma.18G073500/Glyma.01G021200/Glyma.13G310700/Glyma.20G234100…	122
0 h	03410	Base excision repair	33/4234	63/14423	0.000103883	0.0010205	0.00080405	Glyma.11G184100/Glyma.12G088300/Glyma.18G157402/Glyma.03G161300/Glyma.18G067800/Glyma.13G366800/Glyma.08G079500/Glyma.15G265200/Glyma.17G073900/Glyma.08G334900/Glyma.07G059700/Glyma.15G013100/Glyma.06G219600/Glyma.11G183100/Glyma.06G155300/Glyma.02G191100/Glyma.05G124300/Glyma.02G203900/Glyma.04G033700/Glyma.10G141800/Glyma.19G149400/Glyma.14G025300/Glyma.U031407/Glyma.04G210700/Glyma.12G080900/G…	33
0 h	09104	Nucleotide metabolism	97/4234	239/14423	0.000120722	0.00109356	0.000861611	Glyma.05G146000/Glyma.15G217500/Glyma.14G021000/Glyma.02G293500/Glyma.10G121524/Glyma.03G089400/Glyma.19G182400/Glyma.08G232600/Glyma.16G173100/Glyma.02G182400/Glyma.03G189700/Glyma.04G065800/Glyma.01G210800/Glyma.11G047900/Glyma.05G000700/Glyma.15G073000/Glyma.09G126300/Glyma.18G048400/Glyma.05G048400/Glyma.15G106200/Glyma.11G115200/Glyma.10G178900/Glyma.03G109500/Glyma.07G258900/Glyma.05G045200…	97
0 h	00220	Arginine biosynthesis	30/4234	56/14423	0.000124417	0.00109356	0.000861611	Glyma.05G146000/Glyma.01G204600/Glyma.19G111000/Glyma.05G046900/Glyma.14G213300/Glyma.16G153400/Glyma.01G131100/Glyma.10G044300/Glyma.11G047200/Glyma.07G179700/Glyma.04G073800/Glyma.17G128600/Glyma.06G096700/Glyma.04G094600/Glyma.20G009400/Glyma.05G046700/Glyma.01G194700/Glyma.11G043300/Glyma.05G236000/Glyma.04G030500/Glyma.20G000500/Glyma.06G030600/Glyma.12G012400/Glyma.07G104500/Glyma.05G066200…	30
0 h	00230	Purine metabolism	71/4234	168/14423	0.0002308	0.00183447	0.00144538	Glyma.05G146000/Glyma.10G121524/Glyma.19G182400/Glyma.16G173100/Glyma.02G182400/Glyma.03G189700/Glyma.04G065800/Glyma.01G210800/Glyma.11G047900/Glyma.05G000700/Glyma.15G073000/Glyma.09G126300/Glyma.15G106200/Glyma.10G178900/Glyma.03G109500/Glyma.07G258900/Glyma.05G045200/Glyma.19G000700/Glyma.10G156900/Glyma.18G036300/Glyma.07G115900/Glyma.10G100800/Glyma.10G241000/Glyma.03G181900/Glyma.05G186900…	71
0 h	03018	RNA degradation	78/4234	188/14423	0.000237424	0.00183447	0.00144538	Glyma.19G188700/Glyma.16G160800/Glyma.02G293100/Glyma.09G261400/Glyma.13G148200/Glyma.14G021500/Glyma.08G199800/Glyma.07G269500/Glyma.08G192700/Glyma.02G112000/Glyma.06G208200/Glyma.12G239000/Glyma.07G009600/Glyma.20G171200/Glyma.06G041700/Glyma.04G040700/Glyma.17G052100/Glyma.17G102000/Glyma.10G127800/Glyma.07G184300/Glyma.20G079300/Glyma.06G088600/Glyma.10G193200/Glyma.08G065100/Glyma.18G092700…	78
0 h	03420	Nucleotide excision repair	50/4234	110/14423	0.000241667	0.00183447	0.00144538	Glyma.11G070700/Glyma.18G157402/Glyma.10G278800/Glyma.18G067800/Glyma.17G078700/Glyma.04G248900/Glyma.14G133400/Glyma.05G020600/Glyma.17G130800/Glyma.08G079500/Glyma.17G202200/Glyma.08G334900/Glyma.12G096100/Glyma.20G111700/Glyma.08G223800/Glyma.11G183100/Glyma.06G155300/Glyma.09G213500/Glyma.12G206200/Glyma.05G124300/Glyma.19G036900/Glyma.01G030600/Glyma.18G297400/Glyma.14G025300/Glyma.07G002800…	50
0 h	00970	Aminoacyl-tRNA biosynthesis	38/4234	80/14423	0.000449507	0.00326381	0.00257155	Glyma.20G090100/Glyma.10G155000/Glyma.13G152678/Glyma.10G141500/Glyma.20G233300/Glyma.03G224500/Glyma.12G043200/Glyma.01G032500/Glyma.10G289600/Glyma.01G208100/Glyma.12G020700/Glyma.11G034100/Glyma.08G363700/Glyma.05G224000/Glyma.08G031100/Glyma.13G000200/Glyma.05G234900/Glyma.19G221400/Glyma.10G239500/Glyma.10G214200/Glyma.11G117800/Glyma.03G108900/Glyma.01G176800/Glyma.20G177400/Glyma.17G083700…	38
0 h	00250	Alanine, aspartate and glutamate metabolism	43/4234	94/14423	0.000540944	0.00376407	0.0029657	Glyma.04G042100/Glyma.06G043000/Glyma.01G204600/Glyma.19G111000/Glyma.05G046900/Glyma.14G021000/Glyma.02G293500/Glyma.18G210500/Glyma.14G213300/Glyma.16G153400/Glyma.01G131100/Glyma.11G240200/Glyma.05G182600/Glyma.14G162300/Glyma.13G328600/Glyma.04G216000/Glyma.15G263500/Glyma.17G128600/Glyma.02G241400/Glyma.09G222700/Glyma.06G096700/Glyma.04G094600/Glyma.18G017200/Glyma.06G127400/Glyma.05G046700…	43
0 h	00061	Fatty acid biosynthesis	39/4234	85/14423	0.000893528	0.00596877	0.00470278	Glyma.14G121400/Glyma.13G038600/Glyma.19G028800/Glyma.06G112900/Glyma.18G265300/Glyma.13G057400/Glyma.05G129600/Glyma.08G345900/Glyma.11G101400/Glyma.12G027300/Glyma.18G057700/Glyma.15G052500/Glyma.18G156100/Glyma.08G084300/Glyma.07G207200/Glyma.05G221100/Glyma.08G349200/Glyma.18G009200/Glyma.11G164500/Glyma.09G277400/Glyma.02G138100/Glyma.08G024700/Glyma.08G027600/Glyma.13G079900/Glyma.18G243500…	39
0 h	02048	Prokaryotic defense system	13/4234	20/14423	0.00101275	0.00650499	0.00512527	Glyma.11G083600/Glyma.08G322800/Glyma.18G089400/Glyma.20G090100/Glyma.04G187600/Glyma.10G141500/Glyma.01G007800/Glyma.01G160300/Glyma.07G124000/Glyma.14G017600/Glyma.10G071800/Glyma.03G195200/Glyma.19G194800	13
0 h	00333	Prodigiosin biosynthesis	8/4234	10/14423	0.00135262	0.00836621	0.00659172	Glyma.08G345900/Glyma.11G101400/Glyma.12G027300/Glyma.18G057700/Glyma.18G156100/Glyma.18G009200/Glyma.11G164500/Glyma.11G248000	8
0 h	03060	Protein export	40/4234	90/14423	0.00164366	0.00980326	0.00772397	Glyma.08G284800/Glyma.06G227200/Glyma.12G171400/Glyma.08G025700/Glyma.01G133400/Glyma.03G239600/Glyma.12G070500/Glyma.03G034100/Glyma.08G025900/Glyma.05G219400/Glyma.12G156800/Glyma.10G032800/Glyma.14G053200/Glyma.08G101100/Glyma.13G327801/Glyma.08G103600/Glyma.02G258900/Glyma.05G146700/Glyma.05G144700/Glyma.08G336000/Glyma.19G236500/Glyma.10G156000/Glyma.13G268600/Glyma.12G230900/Glyma.05G200600…	40
0 h	00780	Biotin metabolism	15/4234	26/14423	0.00238317	0.0137238	0.0108129	Glyma.05G129600/Glyma.08G345900/Glyma.11G101400/Glyma.12G027300/Glyma.15G052500/Glyma.18G156100/Glyma.08G084300/Glyma.18G009200/Glyma.08G024700/Glyma.08G179900/Glyma.11G248000/Glyma.13G128000/Glyma.12G020600/Glyma.17G047000/Glyma.11G094200	15
0 h	03016	Transfer RNA biogenesis	110/4234	299/14423	0.00308489	0.0171725	0.0135302	Glyma.02G107900/Glyma.01G048400/Glyma.02G108000/Glyma.05G121000/Glyma.16G071100/Glyma.05G114900/Glyma.14G051300/Glyma.08G075600/Glyma.07G101300/Glyma.16G165400/Glyma.17G108000/Glyma.02G266200/Glyma.03G245900/Glyma.01G226800/Glyma.19G052400/Glyma.20G090100/Glyma.19G240700/Glyma.06G142400/Glyma.10G155000/Glyma.13G152678/Glyma.10G141500/Glyma.19G005800/Glyma.20G233300/Glyma.08G090700/Glyma.03G224500…	110
0 h	00196	Photosynthesis - antenna proteins	17/4234	33/14423	0.00611037	0.0329172	0.0259354	Glyma.02G305400/Glyma.16G165200/Glyma.16G165500/Glyma.13G282000/Glyma.12G219300/Glyma.05G128000/Glyma.08G074000/Glyma.16G165800/Glyma.08G082900/Glyma.16G145800/Glyma.01G115900/Glyma.14G008000/Glyma.20G212900/Glyma.09G154700/Glyma.03G060300/Glyma.15G052400/Glyma.08G180000	17
0 h	00660	C5-Branched dibasic acid metabolism	9/4234	14/14423	0.00706143	0.0368518	0.0290355	Glyma.05G167700/Glyma.13G367900/Glyma.11G079000/Glyma.14G217300/Glyma.15G005400/Glyma.08G126100/Glyma.06G169700/Glyma.08G210500/Glyma.01G070700	9
0 h	00010	Glycolysis / Gluconeogenesis	89/4234	243/14423	0.0082369	0.0416837	0.0328425	Glyma.13G035200/Glyma.05G080500/Glyma.01G118000/Glyma.01G116700/Glyma.14G121200/Glyma.16G173100/Glyma.10G041000/Glyma.19G078300/Glyma.08G199800/Glyma.07G269500/Glyma.07G241600/Glyma.18G200300/Glyma.06G105600/Glyma.03G189700/Glyma.01G019200/Glyma.05G058100/Glyma.05G000700/Glyma.15G143100/Glyma.06G122600/Glyma.09G126300/Glyma.06G208200/Glyma.18G257700/Glyma.10G178900/Glyma.18G137300/Glyma.16G018300…	89
0 h	01007	Amino acid related enzymes	55/4234	141/14423	0.0085433	0.0419627	0.0330623	Glyma.07G186000/Glyma.07G186100/Glyma.18G210500/Glyma.13G295000/Glyma.01G131100/Glyma.05G182600/Glyma.08G063500/Glyma.06G235500/Glyma.11G045300/Glyma.20G090100/Glyma.06G235900/Glyma.10G155000/Glyma.13G152678/Glyma.10G141500/Glyma.20G233300/Glyma.03G224500/Glyma.12G043200/Glyma.01G032500/Glyma.10G289600/Glyma.07G185700/Glyma.01G208100/Glyma.12G020700/Glyma.11G034100/Glyma.08G363700/Glyma.05G224000…	55
0 h	00290	Valine, leucine and isoleucine biosynthesis	18/4234	37/14423	0.0102496	0.0489053	0.0385324	Glyma.07G186000/Glyma.07G186100/Glyma.05G167700/Glyma.13G291300/Glyma.13G367900/Glyma.11G045300/Glyma.20G245300/Glyma.11G079000/Glyma.14G217300/Glyma.15G005400/Glyma.13G207900/Glyma.12G122900/Glyma.08G126100/Glyma.10G295400/Glyma.12G210000/Glyma.06G169700/Glyma.08G210500/Glyma.01G070700	18
4 h	03009	Ribosome biogenesis	278/4586	469/14423	1.32001e-35	2.20442e-33	1.76465e-33	Glyma.02G205600/Glyma.14G013102/Glyma.08G081400/Glyma.17G072400/Glyma.09G104000/Glyma.07G043700/Glyma.11G101500/Glyma.15G056100/Glyma.15G254100/Glyma.12G027400/Glyma.14G024600/Glyma.14G115100/Glyma.02G290200/Glyma.09G084600/Glyma.16G099100/Glyma.02G168900/Glyma.10G022600/Glyma.03G001200/Glyma.16G071100/Glyma.10G005700/Glyma.08G316100/Glyma.11G125100/Glyma.05G046400/Glyma.11G114300/Glyma.17G128400…	278
4 h	03032	DNA replication proteins	138/4586	221/14423	4.15816e-21	3.47206e-19	2.7794e-19	Glyma.11G184100/Glyma.12G088300/Glyma.14G154200/Glyma.11G070700/Glyma.07G100600/Glyma.15G276000/Glyma.18G157402/Glyma.03G161300/Glyma.06G116100/Glyma.08G310900/Glyma.17G035000/Glyma.03G219200/Glyma.04G246600/Glyma.09G047300/Glyma.04G133700/Glyma.19G216100/Glyma.10G035700/Glyma.13G031500/Glyma.04G071600/Glyma.13G156400/Glyma.05G129700/Glyma.06G310500/Glyma.17G104000/Glyma.15G154900/Glyma.04G043500…	138
4 h	03008	Ribosome biogenesis in eukaryotes	91/4586	147/14423	4.68335e-14	2.60706e-12	2.08697e-12	Glyma.15G056100/Glyma.14G024600/Glyma.02G290200/Glyma.09G084600/Glyma.10G022600/Glyma.16G071100/Glyma.11G125100/Glyma.05G046400/Glyma.11G114300/Glyma.17G128400/Glyma.05G185000/Glyma.08G176900/Glyma.12G049700/Glyma.08G359600/Glyma.11G068600/Glyma.19G110900/Glyma.07G035600/Glyma.04G200700/Glyma.07G032500/Glyma.19G186600/Glyma.01G176400/Glyma.17G012200/Glyma.08G143000/Glyma.12G095400/Glyma.03G214900…	91
4 h	03013	RNA transport	144/4586	271/14423	1.80834e-13	7.54983e-12	6.04367e-12	Glyma.16G160800/Glyma.19G188700/Glyma.20G171200/Glyma.13G148200/Glyma.01G224700/Glyma.03G106500/Glyma.05G003500/Glyma.07G117800/Glyma.04G074200/Glyma.16G071100/Glyma.19G240700/Glyma.19G101600/Glyma.06G222100/Glyma.19G263400/Glyma.15G010000/Glyma.12G024600/Glyma.05G114900/Glyma.14G170300/Glyma.06G041700/Glyma.04G040700/Glyma.11G162365/Glyma.17G240400/Glyma.11G092200/Glyma.19G052400/Glyma.13G363900…	144
4 h	09124	Replication and repair	127/4586	241/14423	1.03088e-11	3.44314e-10	2.75625e-10	Glyma.11G184100/Glyma.12G088300/Glyma.11G070700/Glyma.U032008/Glyma.07G100600/Glyma.18G157402/Glyma.03G161300/Glyma.17G035000/Glyma.03G219200/Glyma.09G047300/Glyma.13G220400/Glyma.19G216100/Glyma.07G087700/Glyma.15G092000/Glyma.13G156400/Glyma.02G261800/Glyma.01G158400/Glyma.05G129700/Glyma.06G310500/Glyma.17G104000/Glyma.15G154900/Glyma.07G238400/Glyma.12G039200/Glyma.08G232900/Glyma.10G014100/G…	127
4 h	04812	Cytoskeleton proteins	154/4586	311/14423	3.98135e-11	1.10814e-09	8.87072e-10	Glyma.05G149700/Glyma.08G106400/Glyma.17G123400/Glyma.11G253200/Glyma.03G237700/Glyma.10G182800/Glyma.18G073500/Glyma.02G135700/Glyma.20G234200/Glyma.12G191000/Glyma.20G234100/Glyma.09G282500/Glyma.08G174300/Glyma.13G133200/Glyma.15G150100/Glyma.13G310700/Glyma.07G209300/Glyma.15G252800/Glyma.19G195300/Glyma.11G052200/Glyma.09G136400/Glyma.02G296800/Glyma.01G021200/Glyma.10G016000/Glyma.02G015500…	154
4 h	03018	RNA degradation	98/4586	188/14423	4.92046e-09	1.17388e-07	9.39697e-08	Glyma.09G261400/Glyma.16G160800/Glyma.19G188700/Glyma.06G208200/Glyma.02G293100/Glyma.08G192700/Glyma.07G269500/Glyma.20G171200/Glyma.13G148200/Glyma.10G193200/Glyma.08G199800/Glyma.02G112000/Glyma.07G009600/Glyma.20G122600/Glyma.16G036100/Glyma.10G127800/Glyma.06G041700/Glyma.19G005800/Glyma.04G040700/Glyma.15G122400/Glyma.20G197100/Glyma.09G016800/Glyma.03G118400/Glyma.17G240400/Glyma.04G086900…	98
4 h	03012	Translation factors	119/4586	247/14423	4.73012e-08	9.87412e-07	7.90428e-07	Glyma.03G106500/Glyma.07G117800/Glyma.09G275000/Glyma.11G163201/Glyma.03G150600/Glyma.05G114900/Glyma.15G271800/Glyma.08G152400/Glyma.02G108900/Glyma.19G052400/Glyma.15G095800/Glyma.08G340500/Glyma.01G094200/Glyma.16G001900/Glyma.09G077900/Glyma.07G249900/Glyma.08G170000/Glyma.18G280600/Glyma.07G107700/Glyma.18G107500/Glyma.09G046000/Glyma.04G080800/Glyma.05G245100/Glyma.03G002400/Glyma.02G276600…	119
4 h	03030	DNA replication	52/4586	87/14423	6.68371e-08	1.2402e-06	9.92785e-07	Glyma.11G070700/Glyma.18G157402/Glyma.17G035000/Glyma.03G219200/Glyma.09G047300/Glyma.19G216100/Glyma.13G156400/Glyma.05G129700/Glyma.06G310500/Glyma.17G104000/Glyma.15G154900/Glyma.07G238400/Glyma.12G039200/Glyma.11G113300/Glyma.02G286600/Glyma.05G020600/Glyma.08G313400/Glyma.17G078700/Glyma.08G105600/Glyma.18G067800/Glyma.14G025300/Glyma.08G084400/Glyma.18G009300/Glyma.01G187400/Glyma.12G096100…	52
4 h	03400	DNA repair and recombination proteins	194/4586	448/14423	1.39146e-07	2.32374e-06	1.86017e-06	Glyma.11G184100/Glyma.12G088300/Glyma.11G070700/Glyma.U032008/Glyma.07G100600/Glyma.18G157402/Glyma.03G161300/Glyma.04G204000/Glyma.09G264000/Glyma.13G220400/Glyma.07G087700/Glyma.10G029000/Glyma.15G092000/Glyma.02G261800/Glyma.01G158400/Glyma.20G087900/Glyma.08G232900/Glyma.10G014100/Glyma.09G189100/Glyma.13G010700/Glyma.15G060100/Glyma.06G148500/Glyma.08G238200/Glyma.10G227900/Glyma.19G243600/G…	194
4 h	03015	mRNA surveillance pathway	101/4586	213/14423	1.21654e-06	1.84692e-05	1.47847e-05	Glyma.16G160800/Glyma.19G188700/Glyma.04G071700/Glyma.20G171200/Glyma.15G140800/Glyma.13G148200/Glyma.06G073000/Glyma.09G035800/Glyma.19G101600/Glyma.02G306700/Glyma.14G170300/Glyma.06G041700/Glyma.04G040700/Glyma.09G153100/Glyma.17G240400/Glyma.11G123500/Glyma.06G088500/Glyma.17G240500/Glyma.01G121400/Glyma.03G057600/Glyma.04G089400/Glyma.16G203900/Glyma.04G047800/Glyma.16G049600/Glyma.11G237500…	101
4 h	00970	Aminoacyl-tRNA biosynthesis	45/4586	80/14423	5.1391e-06	7.15191e-05	5.72514e-05	Glyma.10G272800/Glyma.12G020700/Glyma.11G034100/Glyma.10G141500/Glyma.10G239500/Glyma.01G032500/Glyma.01G208100/Glyma.13G152678/Glyma.11G102100/Glyma.20G090100/Glyma.03G224500/Glyma.05G224000/Glyma.05G234900/Glyma.10G289600/Glyma.11G094300/Glyma.20G233300/Glyma.07G124000/Glyma.13G000200/Glyma.07G125400/Glyma.19G221400/Glyma.01G006400/Glyma.08G363700/Glyma.12G043200/Glyma.10G272400/Glyma.12G018400…	45
4 h	03040	Spliceosome	134/4586	310/14423	1.29438e-05	0.000166278	0.000133106	Glyma.02G205600/Glyma.17G072400/Glyma.19G101600/Glyma.11G012200/Glyma.14G089078/Glyma.15G253800/Glyma.15G007100/Glyma.02G139900/Glyma.02G034300/Glyma.10G291300/Glyma.14G217400/Glyma.13G245700/Glyma.10G255700/Glyma.03G206600/Glyma.12G239000/Glyma.09G007700/Glyma.07G205500/Glyma.08G173500/Glyma.10G073300/Glyma.15G136300/Glyma.11G199100/Glyma.13G366100/Glyma.01G229700/Glyma.09G031100/Glyma.08G265300…	134
4 h	03016	Transfer RNA biogenesis	127/4586	299/14423	5.70752e-05	0.000680825	0.000545004	Glyma.02G107900/Glyma.09G175800/Glyma.16G071100/Glyma.19G240700/Glyma.19G263400/Glyma.10G272800/Glyma.09G174800/Glyma.12G020700/Glyma.16G036100/Glyma.05G114900/Glyma.19G005800/Glyma.11G034100/Glyma.16G165400/Glyma.05G121000/Glyma.10G141500/Glyma.03G245900/Glyma.10G239500/Glyma.14G075000/Glyma.11G092200/Glyma.19G052400/Glyma.08G075600/Glyma.01G032500/Glyma.01G208100/Glyma.14G051300/Glyma.03G136900…	127
4 h	03410	Base excision repair	35/4586	63/14423	7.96549e-05	0.000886824	0.000709907	Glyma.11G184100/Glyma.12G088300/Glyma.18G157402/Glyma.03G161300/Glyma.08G232900/Glyma.08G313400/Glyma.18G067800/Glyma.14G025300/Glyma.15G265200/Glyma.13G366800/Glyma.06G155300/Glyma.04G210700/Glyma.17G073900/Glyma.02G289700/Glyma.12G087000/Glyma.19G147500/Glyma.12G080900/Glyma.07G059700/Glyma.02G203900/Glyma.08G334900/Glyma.18G292900/Glyma.02G191100/Glyma.U031407/Glyma.08G079500/Glyma.06G219600/G…	35
4 h	03430	Mismatch repair	35/4586	65/14423	0.000184606	0.00192682	0.00154243	Glyma.11G070700/Glyma.07G100600/Glyma.07G087700/Glyma.01G158400/Glyma.09G189100/Glyma.05G020600/Glyma.08G120900/Glyma.17G078700/Glyma.17G121400/Glyma.18G067800/Glyma.12G096100/Glyma.09G213500/Glyma.04G248900/Glyma.06G155300/Glyma.19G216000/Glyma.04G210700/Glyma.10G019200/Glyma.05G163700/Glyma.19G147500/Glyma.06G308700/Glyma.12G080900/Glyma.17G130800/Glyma.14G133400/Glyma.17G202200/Glyma.08G334900…	35
4 h	00333	Prodigiosin biosynthesis	9/4586	10/14423	0.000235998	0.00231833	0.00185583	Glyma.08G102100/Glyma.18G057700/Glyma.11G164500/Glyma.08G345900/Glyma.11G101400/Glyma.12G027300/Glyma.18G156100/Glyma.18G009200/Glyma.11G248000	9
4 h	03021	Transcription machinery	160/4586	402/14423	0.000357547	0.00331724	0.00265547	Glyma.15G087100/Glyma.17G201200/Glyma.01G215700/Glyma.08G021700/Glyma.04G204000/Glyma.06G312200/Glyma.03G230500/Glyma.06G170800/Glyma.15G235900/Glyma.04G195200/Glyma.19G170200/Glyma.06G061600/Glyma.05G215500/Glyma.13G324500/Glyma.18G234700/Glyma.07G069400/Glyma.01G166400/Glyma.15G000900/Glyma.09G066000/Glyma.13G196900/Glyma.05G013400/Glyma.03G121000/Glyma.17G050400/Glyma.03G129500/Glyma.18G000100…	160
4 h	03440	Homologous recombination	44/4586	90/14423	0.000522313	0.00459085	0.003675	Glyma.13G220400/Glyma.15G092000/Glyma.02G261800/Glyma.10G014100/Glyma.13G010700/Glyma.05G020600/Glyma.08G313400/Glyma.17G078700/Glyma.14G025300/Glyma.09G213500/Glyma.06G155300/Glyma.08G188100/Glyma.04G182900/Glyma.04G210700/Glyma.02G289700/Glyma.10G148300/Glyma.08G339900/Glyma.19G147500/Glyma.U027200/Glyma.14G223700/Glyma.12G170000/Glyma.01G244700/Glyma.06G155600/Glyma.12G029200/Glyma.13G363400/G…	44
4 h	01007	Amino acid related enzymes	63/4586	141/14423	0.00086573	0.00722885	0.00578672	Glyma.07G186000/Glyma.07G186100/Glyma.18G210500/Glyma.01G131100/Glyma.10G272800/Glyma.12G020700/Glyma.11G034100/Glyma.10G141500/Glyma.05G182600/Glyma.10G239500/Glyma.08G063500/Glyma.01G032500/Glyma.01G208100/Glyma.13G152678/Glyma.06G235500/Glyma.11G102100/Glyma.06G275700/Glyma.11G045300/Glyma.20G090100/Glyma.16G203600/Glyma.03G224500/Glyma.05G224000/Glyma.05G234900/Glyma.10G289600/Glyma.11G094300…	63
4 h	02010	ABC transporters	26/4586	48/14423	0.00107599	0.00811236	0.00649398	Glyma.17G041400/Glyma.12G135300/Glyma.13G222000/Glyma.06G139500/Glyma.13G118800/Glyma.16G172400/Glyma.16G172600/Glyma.08G270300/Glyma.09G206300/Glyma.02G238300/Glyma.01G016500/Glyma.18G286600/Glyma.18G154200/Glyma.10G055000/Glyma.13G063700/Glyma.14G207200/Glyma.13G370300/Glyma.20G239800/Glyma.10G227400/Glyma.02G094800/Glyma.08G342600/Glyma.13G118500/Glyma.20G165000/Glyma.13G142100/Glyma.03G136000…	26
4 h	09131	Membrane transport	26/4586	48/14423	0.00107599	0.00811236	0.00649398	Glyma.17G041400/Glyma.12G135300/Glyma.13G222000/Glyma.06G139500/Glyma.13G118800/Glyma.16G172400/Glyma.16G172600/Glyma.08G270300/Glyma.09G206300/Glyma.02G238300/Glyma.01G016500/Glyma.18G286600/Glyma.18G154200/Glyma.10G055000/Glyma.13G063700/Glyma.14G207200/Glyma.13G370300/Glyma.20G239800/Glyma.10G227400/Glyma.02G094800/Glyma.08G342600/Glyma.13G118500/Glyma.20G165000/Glyma.13G142100/Glyma.03G136000…	26
4 h	00061	Fatty acid biosynthesis	41/4586	85/14423	0.00111727	0.00811236	0.00649398	Glyma.14G121400/Glyma.13G038600/Glyma.08G102100/Glyma.06G112900/Glyma.19G028800/Glyma.18G265300/Glyma.13G057400/Glyma.08G349200/Glyma.05G129600/Glyma.02G138100/Glyma.18G057700/Glyma.08G084300/Glyma.04G104900/Glyma.07G207200/Glyma.11G164500/Glyma.08G345900/Glyma.12G047400/Glyma.11G101400/Glyma.05G221100/Glyma.06G105900/Glyma.13G079900/Glyma.10G010800/Glyma.12G027300/Glyma.05G216600/Glyma.18G156100…	41
4 h	00220	Arginine biosynthesis	29/4586	56/14423	0.00146162	0.0101705	0.0081415	Glyma.05G146000/Glyma.01G204600/Glyma.19G111000/Glyma.16G153400/Glyma.05G046900/Glyma.14G213300/Glyma.10G044300/Glyma.11G047200/Glyma.01G131100/Glyma.07G179700/Glyma.20G009400/Glyma.04G073800/Glyma.17G128600/Glyma.04G094600/Glyma.06G096700/Glyma.06G275700/Glyma.01G194700/Glyma.12G012400/Glyma.17G216000/Glyma.11G043300/Glyma.20G000500/Glyma.07G104500/Glyma.13G131900/Glyma.07G118300/Glyma.05G046700…	29
4 h	00300	Lysine biosynthesis	13/4586	20/14423	0.00230446	0.0148017	0.0118488	Glyma.16G028900/Glyma.07G060300/Glyma.08G063500/Glyma.05G151100/Glyma.09G268200/Glyma.05G240700/Glyma.08G107800/Glyma.18G221700/Glyma.03G181200/Glyma.02G066100/Glyma.08G047800/Glyma.07G185700/Glyma.19G182000	13
4 h	02048	Prokaryotic defense system	13/4586	20/14423	0.00230446	0.0148017	0.0118488	Glyma.04G187600/Glyma.11G083600/Glyma.10G141500/Glyma.01G007800/Glyma.20G090100/Glyma.18G089400/Glyma.07G124000/Glyma.06G178200/Glyma.08G322800/Glyma.10G071800/Glyma.03G097900/Glyma.01G160300/Glyma.19G194800	13
4 h	03420	Nucleotide excision repair	49/4586	110/14423	0.0033091	0.0204674	0.0163842	Glyma.11G070700/Glyma.U032008/Glyma.18G157402/Glyma.05G020600/Glyma.08G313400/Glyma.17G078700/Glyma.18G067800/Glyma.14G025300/Glyma.12G096100/Glyma.09G213500/Glyma.04G248900/Glyma.13G371600/Glyma.06G155300/Glyma.04G210700/Glyma.02G289700/Glyma.12G087000/Glyma.19G147500/Glyma.06G308700/Glyma.08G223800/Glyma.12G080900/Glyma.17G130800/Glyma.13G124600/Glyma.14G133400/Glyma.20G197500/Glyma.17G202200/G…	49
4 h	09121	Transcription	175/4586	465/14423	0.00384502	0.0229328	0.0183578	Glyma.02G205600/Glyma.17G072400/Glyma.17G201200/Glyma.04G204000/Glyma.19G101600/Glyma.09G066000/Glyma.05G013400/Glyma.11G012200/Glyma.17G050400/Glyma.03G129500/Glyma.14G089078/Glyma.15G253800/Glyma.10G095200/Glyma.15G007100/Glyma.02G139900/Glyma.02G034300/Glyma.09G215000/Glyma.10G291300/Glyma.14G217400/Glyma.13G245700/Glyma.10G255700/Glyma.03G206600/Glyma.12G239000/Glyma.09G007700/Glyma.07G205500…	175
4 h	00563	Glycosylphosphatidylinositol (GPI)-anchor biosynthesis	19/4586	35/14423	0.00478397	0.0275491	0.0220532	Glyma.13G182200/Glyma.18G212600/Glyma.17G131000/Glyma.03G131800/Glyma.01G023700/Glyma.03G064400/Glyma.19G004600/Glyma.01G077400/Glyma.08G081300/Glyma.05G003600/Glyma.06G013600/Glyma.15G092700/Glyma.08G349700/Glyma.05G049100/Glyma.20G052000/Glyma.16G101100/Glyma.13G091700/Glyma.11G086100/Glyma.09G000800	19
4 h	09107	Glycan biosynthesis and metabolism	79/4586	194/14423	0.00515062	0.0286718	0.0229519	Glyma.12G088100/Glyma.10G174500/Glyma.16G154600/Glyma.20G240000/Glyma.04G200900/Glyma.13G182200/Glyma.09G273400/Glyma.20G152400/Glyma.09G138300/Glyma.20G216000/Glyma.02G073200/Glyma.16G126400/Glyma.18G215700/Glyma.10G091000/Glyma.16G048100/Glyma.09G165000/Glyma.01G009300/Glyma.13G163000/Glyma.16G213300/Glyma.17G108200/Glyma.04G209000/Glyma.05G146400/Glyma.02G190700/Glyma.10G038000/Glyma.10G105900…	79
4 h	04091	Lectins	13/4586	22/14423	0.0074692	0.0402373	0.0322101	Glyma.04G202900/Glyma.08G006500/Glyma.05G199200/Glyma.06G162600/Glyma.10G147600/Glyma.19G255000/Glyma.20G098400/Glyma.07G224600/Glyma.16G026200/Glyma.20G024500/Glyma.03G256800/Glyma.11G126100/Glyma.10G179900	13
4 h	00010	Glycolysis / Gluconeogenesis	95/4586	243/14423	0.00910788	0.0475317	0.0380493	Glyma.13G035200/Glyma.01G116700/Glyma.14G121200/Glyma.16G173100/Glyma.08G176600/Glyma.06G208200/Glyma.01G118000/Glyma.01G019200/Glyma.03G189700/Glyma.06G105600/Glyma.07G241600/Glyma.10G041000/Glyma.09G126300/Glyma.07G269500/Glyma.18G200300/Glyma.08G199800/Glyma.15G143100/Glyma.10G241000/Glyma.06G122600/Glyma.10G215400/Glyma.19G252700/Glyma.06G032500/Glyma.05G058100/Glyma.18G257700/Glyma.06G172600…	95
8 h	03050	Proteasome	68/4180	105/14423	2.6835e-14	2.25651e-12	1.82057e-12	Glyma.07G155700/Glyma.08G286200/Glyma.18G206200/Glyma.18G029800/Glyma.16G126300/Glyma.04G078200/Glyma.17G127100/Glyma.03G262800/Glyma.17G252100/Glyma.05G079000/Glyma.10G295600/Glyma.04G249300/Glyma.06G021600/Glyma.14G071000/Glyma.11G199900/Glyma.10G043000/Glyma.01G165100/Glyma.03G170600/Glyma.11G227700/Glyma.09G161300/Glyma.06G219200/Glyma.20G245500/Glyma.02G046900/Glyma.10G279900/Glyma.11G078100…	68
8 h	03051	03051	94/4180	164/14423	2.70241e-14	2.25651e-12	1.82057e-12	Glyma.02G205600/Glyma.17G072400/Glyma.06G236100/Glyma.01G055500/Glyma.18G297400/Glyma.07G155700/Glyma.08G013300/Glyma.08G286200/Glyma.18G206200/Glyma.18G029800/Glyma.16G126300/Glyma.04G078200/Glyma.17G127100/Glyma.03G262800/Glyma.17G252100/Glyma.05G079000/Glyma.10G295600/Glyma.04G249300/Glyma.20G114700/Glyma.05G206400/Glyma.06G021600/Glyma.14G071000/Glyma.11G199900/Glyma.10G043000/Glyma.18G074100…	94
8 h	03009	Ribosome biogenesis	196/4180	469/14423	1.19603e-09	6.65788e-08	5.37163e-08	Glyma.02G205600/Glyma.08G081400/Glyma.14G013102/Glyma.17G072400/Glyma.08G197900/Glyma.18G073100/Glyma.19G110900/Glyma.04G069900/Glyma.16G041400/Glyma.15G056100/Glyma.06G071900/Glyma.10G022600/Glyma.10G200300/Glyma.18G020000/Glyma.11G073200/Glyma.11G152600/Glyma.19G165900/Glyma.05G031500/Glyma.04G139900/Glyma.17G095400/Glyma.04G200700/Glyma.12G028500/Glyma.18G275100/Glyma.11G100700/Glyma.02G151500…	196
8 h	03030	DNA replication	46/4180	87/14423	2.38128e-06	9.94184e-05	8.02115e-05	Glyma.18G157402/Glyma.11G070700/Glyma.18G067800/Glyma.17G078700/Glyma.07G238400/Glyma.05G129700/Glyma.11G113300/Glyma.10G278800/Glyma.09G047300/Glyma.04G248900/Glyma.17G202200/Glyma.09G213500/Glyma.08G334900/Glyma.14G133400/Glyma.17G104000/Glyma.12G039200/Glyma.05G020600/Glyma.18G009300/Glyma.15G154900/Glyma.02G206800/Glyma.19G216100/Glyma.17G130800/Glyma.12G206200/Glyma.03G196800/Glyma.20G111700…	46
8 h	03032	DNA replication proteins	95/4180	221/14423	5.49285e-06	0.000183461	0.000148018	Glyma.11G184100/Glyma.12G088300/Glyma.18G157402/Glyma.11G070700/Glyma.09G258700/Glyma.13G031500/Glyma.13G122100/Glyma.04G043500/Glyma.03G161300/Glyma.19G110900/Glyma.06G116100/Glyma.14G154200/Glyma.10G035700/Glyma.04G246600/Glyma.18G067800/Glyma.08G310900/Glyma.06G072900/Glyma.17G078700/Glyma.16G041400/Glyma.15G056100/Glyma.15G276000/Glyma.10G014100/Glyma.04G133700/Glyma.19G165900/Glyma.07G238400…	95
8 h	03060	Protein export	46/4180	90/14423	7.91168e-06	0.000220208	0.000177666	Glyma.06G227200/Glyma.12G070500/Glyma.08G025700/Glyma.03G034100/Glyma.12G171400/Glyma.03G239600/Glyma.12G156800/Glyma.10G156400/Glyma.01G133400/Glyma.05G219400/Glyma.08G284800/Glyma.08G103600/Glyma.13G327801/Glyma.13G268600/Glyma.08G336000/Glyma.05G146700/Glyma.02G258900/Glyma.05G144700/Glyma.14G053200/Glyma.08G025900/Glyma.02G254500/Glyma.10G156000/Glyma.18G071100/Glyma.12G230900/Glyma.02G036200…	46
8 h	03013	RNA transport	109/4180	271/14423	4.12976e-05	0.000985242	0.000794901	Glyma.19G188700/Glyma.13G148200/Glyma.16G160800/Glyma.02G206900/Glyma.02G266200/Glyma.01G224700/Glyma.06G041700/Glyma.18G133400/Glyma.13G363900/Glyma.11G213900/Glyma.15G097500/Glyma.13G232100/Glyma.04G040700/Glyma.15G010000/Glyma.03G263500/Glyma.02G147200/Glyma.17G053200/Glyma.08G290700/Glyma.20G171200/Glyma.15G075100/Glyma.05G114900/Glyma.14G051300/Glyma.09G234100/Glyma.09G233200/Glyma.08G172000…	109
8 h	03008	Ribosome biogenesis in eukaryotes	65/4180	147/14423	5.66508e-05	0.00111363	0.000898484	Glyma.19G110900/Glyma.16G041400/Glyma.15G056100/Glyma.10G022600/Glyma.18G020000/Glyma.11G152600/Glyma.19G165900/Glyma.04G139900/Glyma.04G200700/Glyma.02G151500/Glyma.08G013300/Glyma.11G213900/Glyma.11G142700/Glyma.08G176900/Glyma.14G196700/Glyma.11G237200/Glyma.05G046400/Glyma.20G161600/Glyma.17G128400/Glyma.05G206400/Glyma.10G232700/Glyma.17G233900/Glyma.17G115400/Glyma.17G083500/Glyma.07G032500…	65
8 h	09124	Replication and repair	98/4180	241/14423	6.00159e-05	0.00111363	0.000898484	Glyma.11G184100/Glyma.12G088300/Glyma.18G157402/Glyma.11G070700/Glyma.08G232900/Glyma.02G261800/Glyma.15G265200/Glyma.03G161300/Glyma.18G067800/Glyma.15G217300/Glyma.17G078700/Glyma.10G014100/Glyma.18G297400/Glyma.07G087700/Glyma.07G238400/Glyma.05G129700/Glyma.11G113300/Glyma.10G278800/Glyma.U027200/Glyma.09G047300/Glyma.09G189100/Glyma.04G248900/Glyma.17G202200/Glyma.17G121400/Glyma.09G213500/G…	98
8 h	00220	Arginine biosynthesis	30/4180	56/14423	9.61715e-05	0.00160606	0.00129578	Glyma.05G146000/Glyma.01G204600/Glyma.19G111000/Glyma.16G153400/Glyma.05G046900/Glyma.01G131100/Glyma.07G104500/Glyma.01G194700/Glyma.11G047200/Glyma.06G082400/Glyma.10G044300/Glyma.05G046700/Glyma.07G179700/Glyma.04G073800/Glyma.04G094600/Glyma.05G236000/Glyma.06G096700/Glyma.17G128600/Glyma.05G066200/Glyma.20G009400/Glyma.04G030500/Glyma.20G000500/Glyma.11G043300/Glyma.06G030600/Glyma.07G118300…	30
8 h	00196	Photosynthesis - antenna proteins	20/4180	33/14423	0.000152088	0.00211181	0.00170382	Glyma.02G305400/Glyma.16G165200/Glyma.16G165500/Glyma.12G219300/Glyma.13G282000/Glyma.08G074000/Glyma.14G008000/Glyma.05G128000/Glyma.20G212900/Glyma.16G145800/Glyma.02G309500/Glyma.15G052400/Glyma.01G115900/Glyma.16G165800/Glyma.09G154700/Glyma.08G082900/Glyma.03G060300/Glyma.03G262300/Glyma.08G180000/Glyma.07G047600	20
8 h	00300	Lysine biosynthesis	14/4180	20/14423	0.000172129	0.00211181	0.00170382	Glyma.08G063500/Glyma.16G028900/Glyma.09G268200/Glyma.18G221700/Glyma.07G060300/Glyma.05G240700/Glyma.03G181200/Glyma.19G182000/Glyma.08G047800/Glyma.08G107800/Glyma.07G185700/Glyma.19G174300/Glyma.03G173400/Glyma.05G151100	14
8 h	00660	C5-Branched dibasic acid metabolism	11/4180	14/14423	0.000173823	0.00211181	0.00170382	Glyma.05G167700/Glyma.06G169700/Glyma.14G217300/Glyma.13G367900/Glyma.08G126100/Glyma.11G079000/Glyma.15G005400/Glyma.15G072500/Glyma.13G241000/Glyma.08G210500/Glyma.17G256102	11
8 h	03012	Translation factors	98/4180	247/14423	0.000178919	0.00211181	0.00170382	Glyma.09G275000/Glyma.18G107500/Glyma.13G073200/Glyma.16G001900/Glyma.01G054000/Glyma.06G082500/Glyma.18G133400/Glyma.08G167900/Glyma.12G165301/Glyma.04G080800/Glyma.02G276600/Glyma.09G046000/Glyma.02G112400/Glyma.08G275900/Glyma.08G046300/Glyma.09G089600/Glyma.03G263500/Glyma.17G053200/Glyma.08G290700/Glyma.14G039100/Glyma.06G170900/Glyma.15G075100/Glyma.05G114900/Glyma.15G197200/Glyma.09G234100…	98
8 h	04141	Protein processing in endoplasmic reticulum	142/4180	379/14423	0.000189683	0.00211181	0.00170382	Glyma.02G076600/Glyma.02G205600/Glyma.02G252800/Glyma.14G063700/Glyma.04G186000/Glyma.08G212000/Glyma.07G200000/Glyma.06G180000/Glyma.17G072400/Glyma.10G176400/Glyma.06G054700/Glyma.13G176000/Glyma.04G247900/Glyma.03G232000/Glyma.18G094600/Glyma.16G012000/Glyma.14G063800/Glyma.13G077300/Glyma.20G015900/Glyma.16G050800/Glyma.06G227200/Glyma.07G200200/Glyma.12G151200/Glyma.11G098300/Glyma.06G114800…	142
8 h	03430	Mismatch repair	32/4180	65/14423	0.000441902	0.00461235	0.00372128	Glyma.11G070700/Glyma.18G067800/Glyma.17G078700/Glyma.07G087700/Glyma.10G278800/Glyma.09G189100/Glyma.04G248900/Glyma.17G202200/Glyma.17G121400/Glyma.09G213500/Glyma.08G334900/Glyma.14G133400/Glyma.05G020600/Glyma.17G130800/Glyma.12G206200/Glyma.03G196800/Glyma.20G111700/Glyma.06G114100/Glyma.05G014200/Glyma.08G079500/Glyma.02G034800/Glyma.04G246800/Glyma.05G089100/Glyma.12G096100/Glyma.01G030600…	32
8 h	00061	Fatty acid biosynthesis	39/4180	85/14423	0.000679673	0.00667679	0.00538688	Glyma.14G121400/Glyma.13G038600/Glyma.19G028800/Glyma.13G057400/Glyma.18G265300/Glyma.15G052500/Glyma.06G112900/Glyma.07G207200/Glyma.05G129600/Glyma.08G345900/Glyma.11G101400/Glyma.02G138100/Glyma.12G027300/Glyma.18G156100/Glyma.08G084300/Glyma.18G057700/Glyma.18G167300/Glyma.10G010800/Glyma.09G277400/Glyma.18G009200/Glyma.13G010100/Glyma.18G243500/Glyma.08G179900/Glyma.05G221100/Glyma.08G349200…	39
8 h	00333	Prodigiosin biosynthesis	8/4180	10/14423	0.00123147	0.0114253	0.00921799	Glyma.08G345900/Glyma.11G101400/Glyma.12G027300/Glyma.18G156100/Glyma.18G057700/Glyma.18G009200/Glyma.11G248000/Glyma.11G164500	8
8 h	03110	Chaperones and folding catalysts	172/4180	494/14423	0.00242324	0.0210715	0.0170006	Glyma.02G076600/Glyma.02G205600/Glyma.02G252800/Glyma.14G063700/Glyma.15G077700/Glyma.08G212000/Glyma.07G200000/Glyma.16G052800/Glyma.19G096600/Glyma.17G072400/Glyma.10G176400/Glyma.02G187800/Glyma.06G054700/Glyma.12G136400/Glyma.13G176000/Glyma.20G240000/Glyma.10G195200/Glyma.04G247900/Glyma.03G232000/Glyma.18G094600/Glyma.16G012000/Glyma.14G063800/Glyma.13G077300/Glyma.20G015900/Glyma.01G238600…	172
8 h	00010	Glycolysis / Gluconeogenesis	91/4180	243/14423	0.00252353	0.0210715	0.0170006	Glyma.13G035200/Glyma.01G116700/Glyma.08G138100/Glyma.07G269500/Glyma.08G199800/Glyma.01G118000/Glyma.08G200600/Glyma.16G173100/Glyma.01G019200/Glyma.14G121200/Glyma.18G200300/Glyma.05G058100/Glyma.06G105600/Glyma.05G000700/Glyma.06G032500/Glyma.09G126300/Glyma.06G122600/Glyma.18G137300/Glyma.10G241000/Glyma.03G189700/Glyma.16G018300/Glyma.10G201100/Glyma.10G178900/Glyma.19G000700/Glyma.10G041000…	91
8 h	00261	Monobactam biosynthesis	10/4180	15/14423	0.0027381	0.0217744	0.0175677	Glyma.16G028900/Glyma.09G268200/Glyma.18G221700/Glyma.07G060300/Glyma.05G240700/Glyma.10G242600/Glyma.08G047800/Glyma.08G107800/Glyma.13G051000/Glyma.05G151100	10
8 h	00250	Alanine, aspartate and glutamate metabolism	40/4180	94/14423	0.00333637	0.0248366	0.0200384	Glyma.04G042100/Glyma.06G043000/Glyma.01G204600/Glyma.14G021000/Glyma.19G111000/Glyma.02G293500/Glyma.16G153400/Glyma.05G046900/Glyma.18G210500/Glyma.01G131100/Glyma.05G182600/Glyma.17G238200/Glyma.15G263500/Glyma.07G104500/Glyma.11G240200/Glyma.08G163700/Glyma.04G216000/Glyma.13G328600/Glyma.06G082400/Glyma.05G046700/Glyma.04G094600/Glyma.12G036200/Glyma.06G150000/Glyma.05G236000/Glyma.14G162300…	40
8 h	00290	Valine, leucine and isoleucine biosynthesis	19/4180	37/14423	0.00342062	0.0248366	0.0200384	Glyma.07G186000/Glyma.07G186100/Glyma.05G167700/Glyma.06G169700/Glyma.13G291300/Glyma.14G217300/Glyma.11G045300/Glyma.13G367900/Glyma.08G126100/Glyma.12G210000/Glyma.11G079000/Glyma.20G245300/Glyma.15G005400/Glyma.12G122900/Glyma.15G072500/Glyma.13G241000/Glyma.08G210500/Glyma.10G295400/Glyma.17G256102	19
8 h	00230	Purine metabolism	65/4180	168/14423	0.0041032	0.0285514	0.0230355	Glyma.05G146000/Glyma.10G121524/Glyma.19G182400/Glyma.16G173100/Glyma.02G182400/Glyma.04G065800/Glyma.11G047900/Glyma.05G000700/Glyma.14G115700/Glyma.15G106200/Glyma.15G073000/Glyma.09G126300/Glyma.10G241000/Glyma.03G189700/Glyma.10G201100/Glyma.10G178900/Glyma.19G000700/Glyma.01G210800/Glyma.05G045200/Glyma.06G067200/Glyma.10G100800/Glyma.05G070500/Glyma.03G109500/Glyma.19G091400/Glyma.18G036300…	65
8 h	03420	Nucleotide excision repair	45/4180	110/14423	0.00477034	0.0318658	0.0257096	Glyma.18G157402/Glyma.11G070700/Glyma.18G067800/Glyma.17G078700/Glyma.18G297400/Glyma.10G278800/Glyma.04G248900/Glyma.17G202200/Glyma.09G213500/Glyma.08G334900/Glyma.14G133400/Glyma.05G020600/Glyma.20G114700/Glyma.08G047000/Glyma.07G002800/Glyma.17G130800/Glyma.12G206200/Glyma.08G262900/Glyma.01G081500/Glyma.08G223800/Glyma.03G196800/Glyma.20G111700/Glyma.05G140800/Glyma.10G275100/Glyma.06G114100…	45
8 h	09104	Nucleotide metabolism	88/4180	239/14423	0.00504598	0.0324107	0.0261492	Glyma.05G146000/Glyma.14G021000/Glyma.10G121524/Glyma.15G217500/Glyma.02G293500/Glyma.03G089400/Glyma.19G182400/Glyma.16G173100/Glyma.08G232600/Glyma.02G182400/Glyma.04G065800/Glyma.11G047900/Glyma.05G000700/Glyma.14G115700/Glyma.15G106200/Glyma.15G073000/Glyma.09G126300/Glyma.10G241000/Glyma.03G189700/Glyma.10G201100/Glyma.10G178900/Glyma.19G000700/Glyma.01G210800/Glyma.05G045200/Glyma.06G067200…	88
8 h	02044	Secretion system	34/4180	79/14423	0.00525605	0.0325096	0.026229	Glyma.13G191200/Glyma.06G227200/Glyma.09G171600/Glyma.12G070500/Glyma.07G106600/Glyma.03G034100/Glyma.12G171400/Glyma.12G156800/Glyma.10G156400/Glyma.01G133400/Glyma.08G284800/Glyma.13G327801/Glyma.13G268600/Glyma.08G336000/Glyma.02G258900/Glyma.05G144700/Glyma.14G053200/Glyma.18G071100/Glyma.12G230900/Glyma.02G036200/Glyma.10G032800/Glyma.08G101100/Glyma.11G155259/Glyma.02G141101/Glyma.15G006700…	34
8 h	00780	Biotin metabolism	14/4180	26/14423	0.00673158	0.0401491	0.0323926	Glyma.15G052500/Glyma.05G129600/Glyma.08G345900/Glyma.11G101400/Glyma.12G027300/Glyma.18G156100/Glyma.08G084300/Glyma.18G009200/Glyma.08G179900/Glyma.11G248000/Glyma.11G094200/Glyma.17G047000/Glyma.13G128000/Glyma.12G020600	14
8 h	03040	Spliceosome	110/4180	310/14423	0.00715926	0.0412275	0.0332626	Glyma.02G205600/Glyma.17G072400/Glyma.12G239000/Glyma.07G130900/Glyma.04G208600/Glyma.03G152100/Glyma.05G149300/Glyma.20G113200/Glyma.18G266500/Glyma.15G097500/Glyma.20G084000/Glyma.14G025900/Glyma.17G063100/Glyma.14G196700/Glyma.19G114900/Glyma.05G127900/Glyma.07G205500/Glyma.16G037700/Glyma.20G075100/Glyma.17G115400/Glyma.19G250800/Glyma.19G082500/Glyma.03G155000/Glyma.08G143900/Glyma.09G283300…	110
8 h	03018	RNA degradation	70/4180	188/14423	0.00857014	0.0477071	0.0384905	Glyma.19G188700/Glyma.14G021500/Glyma.13G148200/Glyma.07G269500/Glyma.08G199800/Glyma.02G293100/Glyma.12G239000/Glyma.16G160800/Glyma.06G208200/Glyma.17G052100/Glyma.18G092700/Glyma.06G088600/Glyma.06G041700/Glyma.05G149300/Glyma.04G040700/Glyma.06G061100/Glyma.05G127900/Glyma.20G171200/Glyma.08G065100/Glyma.13G107300/Glyma.02G112000/Glyma.14G101700/Glyma.17G102000/Glyma.19G190900/Glyma.08G192700…	70
12 h	03009	Ribosome biogenesis	226/4185	469/14423	4.34624e-19	7.21475e-17	5.99323e-17	Glyma.02G205600/Glyma.14G013102/Glyma.08G081400/Glyma.08G197900/Glyma.17G072400/Glyma.11G155468/Glyma.20G235400/Glyma.19G110900/Glyma.15G056100/Glyma.10G022600/Glyma.16G041400/Glyma.06G071900/Glyma.07G170800/Glyma.18G020000/Glyma.15G254100/Glyma.04G069900/Glyma.11G152600/Glyma.13G107200/Glyma.04G139900/Glyma.08G173300/Glyma.09G023100/Glyma.17G012200/Glyma.07G261900/Glyma.17G128400/Glyma.02G151500…	226
12 h	03051	03051	85/4185	164/14423	6.01217e-10	4.9901e-08	4.14524e-08	Glyma.02G205600/Glyma.17G072400/Glyma.03G058400/Glyma.06G236100/Glyma.07G170800/Glyma.01G055500/Glyma.18G297400/Glyma.14G071000/Glyma.05G079000/Glyma.08G332900/Glyma.18G029800/Glyma.17G127100/Glyma.08G013300/Glyma.13G371600/Glyma.09G161300/Glyma.18G074100/Glyma.04G249300/Glyma.17G252100/Glyma.14G011600/Glyma.08G286200/Glyma.03G170600/Glyma.13G031200/Glyma.10G295600/Glyma.08G260400/Glyma.04G078200…	85
12 h	03050	Proteasome	60/4185	105/14423	1.53426e-09	6.84221e-08	5.68377e-08	Glyma.03G058400/Glyma.14G071000/Glyma.05G079000/Glyma.18G029800/Glyma.17G127100/Glyma.09G161300/Glyma.04G249300/Glyma.17G252100/Glyma.08G286200/Glyma.03G170600/Glyma.13G031200/Glyma.10G295600/Glyma.04G078200/Glyma.18G050900/Glyma.14G073000/Glyma.11G199900/Glyma.07G155700/Glyma.10G279900/Glyma.04G077400/Glyma.16G126300/Glyma.03G262800/Glyma.14G221600/Glyma.18G138900/Glyma.06G021600/Glyma.20G245500…	60
12 h	03032	DNA replication proteins	106/4185	221/14423	1.64873e-09	6.84221e-08	5.68377e-08	Glyma.11G184100/Glyma.13G031500/Glyma.12G088300/Glyma.14G154200/Glyma.11G070700/Glyma.04G071600/Glyma.06G116100/Glyma.04G246600/Glyma.08G310900/Glyma.15G276000/Glyma.03G161300/Glyma.13G122100/Glyma.17G078700/Glyma.10G035700/Glyma.05G020600/Glyma.19G216100/Glyma.17G104000/Glyma.19G110900/Glyma.12G039200/Glyma.11G083600/Glyma.17G035000/Glyma.05G129700/Glyma.15G056100/Glyma.09G047300/Glyma.18G167000…	106
12 h	03008	Ribosome biogenesis in eukaryotes	75/4185	147/14423	1.47416e-08	4.8942e-07	4.06557e-07	Glyma.19G110900/Glyma.15G056100/Glyma.10G022600/Glyma.16G041400/Glyma.18G020000/Glyma.11G152600/Glyma.04G139900/Glyma.17G012200/Glyma.07G261900/Glyma.17G128400/Glyma.02G151500/Glyma.11G114300/Glyma.19G165900/Glyma.09G084600/Glyma.08G176900/Glyma.04G200700/Glyma.07G032500/Glyma.19G186600/Glyma.16G071100/Glyma.05G046400/Glyma.08G013300/Glyma.11G237200/Glyma.04G069100/Glyma.14G024600/Glyma.17G115400…	75
12 h	09124	Replication and repair	106/4185	241/14423	4.55511e-07	1.26025e-05	1.04688e-05	Glyma.11G184100/Glyma.12G088300/Glyma.11G070700/Glyma.08G232900/Glyma.02G261800/Glyma.15G265200/Glyma.03G161300/Glyma.15G217300/Glyma.17G078700/Glyma.07G087700/Glyma.09G189100/Glyma.05G020600/Glyma.19G216100/Glyma.15G092000/Glyma.17G104000/Glyma.12G039200/Glyma.17G035000/Glyma.05G129700/Glyma.09G047300/Glyma.17G073900/Glyma.18G067800/Glyma.11G113300/Glyma.07G238400/Glyma.14G133400/Glyma.13G220400…	106
12 h	04812	Cytoskeleton proteins	130/4185	311/14423	7.81832e-07	1.85406e-05	1.54015e-05	Glyma.09G136400/Glyma.05G149700/Glyma.20G207200/Glyma.03G237700/Glyma.08G106400/Glyma.15G150100/Glyma.11G052200/Glyma.11G253200/Glyma.15G252800/Glyma.01G190000/Glyma.20G234200/Glyma.13G133200/Glyma.20G159200/Glyma.02G302800/Glyma.10G182800/Glyma.12G191000/Glyma.13G310700/Glyma.18G180900/Glyma.01G021200/Glyma.15G063200/Glyma.02G296800/Glyma.02G135700/Glyma.08G062500/Glyma.18G073500/Glyma.10G045500…	130
12 h	03030	DNA replication	45/4185	87/14423	6.82414e-06	0.000141601	0.000117627	Glyma.11G070700/Glyma.17G078700/Glyma.05G020600/Glyma.19G216100/Glyma.17G104000/Glyma.12G039200/Glyma.17G035000/Glyma.05G129700/Glyma.09G047300/Glyma.18G067800/Glyma.11G113300/Glyma.07G238400/Glyma.14G133400/Glyma.18G009300/Glyma.02G286600/Glyma.03G219200/Glyma.15G154900/Glyma.04G248900/Glyma.13G156400/Glyma.17G202200/Glyma.08G334900/Glyma.09G213500/Glyma.10G278800/Glyma.08G313400/Glyma.08G084400…	45
12 h	00300	Lysine biosynthesis	15/4185	20/14423	2.73708e-05	0.000504839	0.000419365	Glyma.08G063500/Glyma.16G028900/Glyma.09G268200/Glyma.07G060300/Glyma.18G221700/Glyma.05G240700/Glyma.03G181200/Glyma.19G182000/Glyma.07G185700/Glyma.05G151100/Glyma.19G174300/Glyma.08G107800/Glyma.02G066100/Glyma.03G173400/Glyma.08G047800	15
12 h	03013	RNA transport	109/4185	271/14423	4.3615e-05	0.000724009	0.000601428	Glyma.19G188700/Glyma.13G148200/Glyma.16G160800/Glyma.01G224700/Glyma.10G063700/Glyma.02G147200/Glyma.06G041700/Glyma.02G206900/Glyma.20G171200/Glyma.19G240700/Glyma.15G010000/Glyma.14G051300/Glyma.13G363900/Glyma.04G040700/Glyma.19G101600/Glyma.04G074200/Glyma.02G266200/Glyma.05G114900/Glyma.15G075100/Glyma.16G071100/Glyma.03G106500/Glyma.15G097500/Glyma.11G162365/Glyma.04G069100/Glyma.07G117800…	109
12 h	00220	Arginine biosynthesis	30/4185	56/14423	9.85151e-05	0.00148668	0.00123497	Glyma.05G146000/Glyma.19G111000/Glyma.01G204600/Glyma.05G046900/Glyma.16G153400/Glyma.07G179700/Glyma.10G044300/Glyma.01G194700/Glyma.11G047200/Glyma.01G131100/Glyma.20G009400/Glyma.04G094600/Glyma.17G128600/Glyma.05G046700/Glyma.06G096700/Glyma.04G073800/Glyma.14G213300/Glyma.04G030500/Glyma.06G030600/Glyma.06G082400/Glyma.07G104500/Glyma.20G000500/Glyma.05G066200/Glyma.05G236000/Glyma.11G043300…	30
12 h	00061	Fatty acid biosynthesis	41/4185	85/14423	0.000136021	0.00188163	0.00156305	Glyma.14G121400/Glyma.13G038600/Glyma.19G028800/Glyma.13G057400/Glyma.06G112900/Glyma.18G265300/Glyma.05G129600/Glyma.08G345900/Glyma.15G052500/Glyma.18G156100/Glyma.11G101400/Glyma.08G084300/Glyma.07G207200/Glyma.12G027300/Glyma.08G179900/Glyma.18G057700/Glyma.05G221100/Glyma.08G349200/Glyma.02G138100/Glyma.05G216600/Glyma.18G009200/Glyma.11G248000/Glyma.08G027600/Glyma.11G164500/Glyma.18G167300…	41
12 h	00010	Glycolysis / Gluconeogenesis	94/4185	243/14423	0.000687832	0.00878309	0.00729604	Glyma.13G035200/Glyma.01G116700/Glyma.16G173100/Glyma.01G118000/Glyma.01G024800/Glyma.08G199800/Glyma.14G121200/Glyma.07G269500/Glyma.06G208200/Glyma.07G241600/Glyma.06G122600/Glyma.06G105600/Glyma.10G041000/Glyma.05G000700/Glyma.09G126300/Glyma.10G201100/Glyma.03G189700/Glyma.01G019200/Glyma.18G200300/Glyma.05G058100/Glyma.10G241000/Glyma.15G143100/Glyma.19G000700/Glyma.16G018300/Glyma.10G215400…	94
12 h	00250	Alanine, aspartate and glutamate metabolism	42/4185	94/14423	0.000868652	0.0102997	0.0085559	Glyma.04G042100/Glyma.06G043000/Glyma.19G111000/Glyma.01G204600/Glyma.14G021000/Glyma.02G293500/Glyma.05G046900/Glyma.18G210500/Glyma.16G153400/Glyma.05G182600/Glyma.11G240200/Glyma.17G238200/Glyma.14G162300/Glyma.15G263500/Glyma.01G131100/Glyma.08G163700/Glyma.04G094600/Glyma.17G128600/Glyma.04G216000/Glyma.13G328600/Glyma.05G046700/Glyma.06G096700/Glyma.19G065600/Glyma.09G249100/Glyma.14G213300…	42
12 h	04141	Protein processing in endoplasmic reticulum	138/4185	379/14423	0.000972036	0.0107572	0.00893591	Glyma.02G076600/Glyma.02G252800/Glyma.14G063700/Glyma.02G205600/Glyma.04G186000/Glyma.06G180000/Glyma.17G072400/Glyma.08G212000/Glyma.13G077300/Glyma.03G232000/Glyma.13G176000/Glyma.07G200000/Glyma.14G063800/Glyma.04G247900/Glyma.06G054700/Glyma.20G065900/Glyma.11G146800/Glyma.06G114800/Glyma.06G227200/Glyma.16G012000/Glyma.07G200200/Glyma.20G015900/Glyma.16G050800/Glyma.04G202900/Glyma.12G151200…	138
12 h	00333	Prodigiosin biosynthesis	8/4185	10/14423	0.00124228	0.0123651	0.0102716	Glyma.08G345900/Glyma.18G156100/Glyma.11G101400/Glyma.12G027300/Glyma.18G057700/Glyma.18G009200/Glyma.11G248000/Glyma.11G164500	8
12 h	03012	Translation factors	94/4185	247/14423	0.00126859	0.0123651	0.0102716	Glyma.09G275000/Glyma.18G107500/Glyma.16G001900/Glyma.03G150600/Glyma.09G046000/Glyma.13G194000/Glyma.06G082500/Glyma.08G275900/Glyma.05G114900/Glyma.15G075100/Glyma.04G080800/Glyma.13G073200/Glyma.02G276600/Glyma.02G297900/Glyma.03G106500/Glyma.12G024800/Glyma.12G165301/Glyma.08G167900/Glyma.07G117800/Glyma.11G227900/Glyma.07G273500/Glyma.05G041900/Glyma.03G002400/Glyma.15G153300/Glyma.19G153200…	94
12 h	03410	Base excision repair	30/4185	63/14423	0.00134079	0.0123651	0.0102716	Glyma.11G184100/Glyma.12G088300/Glyma.08G232900/Glyma.15G265200/Glyma.03G161300/Glyma.15G217300/Glyma.17G073900/Glyma.18G067800/Glyma.08G334900/Glyma.19G162800/Glyma.08G313400/Glyma.13G366800/Glyma.02G191100/Glyma.02G203900/Glyma.15G013100/Glyma.06G219600/Glyma.U031407/Glyma.19G147500/Glyma.19G149400/Glyma.10G141800/Glyma.14G025300/Glyma.04G031600/Glyma.07G059700/Glyma.20G090300/Glyma.12G080900/G…	30
12 h	09104	Nucleotide metabolism	91/4185	239/14423	0.00147515	0.0128882	0.0107061	Glyma.05G146000/Glyma.14G021000/Glyma.02G293500/Glyma.15G217500/Glyma.16G173100/Glyma.03G089400/Glyma.04G065800/Glyma.10G121524/Glyma.19G182400/Glyma.08G232600/Glyma.02G182400/Glyma.05G000700/Glyma.09G126300/Glyma.10G201100/Glyma.15G073000/Glyma.14G115700/Glyma.03G189700/Glyma.10G241000/Glyma.15G106200/Glyma.19G000700/Glyma.10G178900/Glyma.11G115200/Glyma.18G048400/Glyma.03G109500/Glyma.06G148500…	91
12 h	03110	Chaperones and folding catalysts	173/4185	494/14423	0.00188327	0.0156312	0.0129847	Glyma.02G076600/Glyma.15G077700/Glyma.02G252800/Glyma.14G063700/Glyma.02G205600/Glyma.10G195200/Glyma.19G096600/Glyma.17G072400/Glyma.08G212000/Glyma.13G077300/Glyma.16G052800/Glyma.03G232000/Glyma.02G187800/Glyma.13G176000/Glyma.20G240000/Glyma.07G200000/Glyma.14G063800/Glyma.04G247900/Glyma.12G210100/Glyma.20G073000/Glyma.08G192700/Glyma.01G238600/Glyma.07G149200/Glyma.06G054700/Glyma.20G065900…	173
12 h	02048	Prokaryotic defense system	12/4185	20/14423	0.0037734	0.0298278	0.0247777	Glyma.11G083600/Glyma.01G007800/Glyma.18G089400/Glyma.10G141500/Glyma.04G187600/Glyma.20G090100/Glyma.08G322800/Glyma.14G017600/Glyma.03G195200/Glyma.10G071800/Glyma.02G295800/Glyma.19G194800	12
12 h	00603	Glycosphingolipid biosynthesis - globo and isoglobo series	11/4185	18/14423	0.00455531	0.0343719	0.0285524	Glyma.12G088100/Glyma.09G273400/Glyma.18G215700/Glyma.13G241600/Glyma.20G240000/Glyma.10G174500/Glyma.20G216000/Glyma.08G159500/Glyma.10G290900/Glyma.18G286200/Glyma.06G144100	11
12 h	03060	Protein export	38/4185	90/14423	0.00498051	0.0359463	0.0298603	Glyma.08G284800/Glyma.06G227200/Glyma.08G025700/Glyma.12G156800/Glyma.03G239600/Glyma.05G219400/Glyma.08G025900/Glyma.10G156000/Glyma.08G336000/Glyma.12G171400/Glyma.12G230900/Glyma.12G070500/Glyma.13G268600/Glyma.01G133400/Glyma.03G034100/Glyma.14G053200/Glyma.08G103600/Glyma.08G101100/Glyma.05G144700/Glyma.02G258900/Glyma.02G254500/Glyma.05G146700/Glyma.13G327801/Glyma.18G071100/Glyma.15G006700…	38
12 h	03430	Mismatch repair	29/4185	65/14423	0.00529609	0.0366313	0.0304293	Glyma.11G070700/Glyma.17G078700/Glyma.07G087700/Glyma.09G189100/Glyma.05G020600/Glyma.18G067800/Glyma.14G133400/Glyma.08G120900/Glyma.04G248900/Glyma.17G202200/Glyma.17G121400/Glyma.05G163700/Glyma.08G334900/Glyma.01G158400/Glyma.09G213500/Glyma.10G278800/Glyma.17G130800/Glyma.19G147500/Glyma.12G206200/Glyma.12G096100/Glyma.05G014200/Glyma.01G030600/Glyma.05G089100/Glyma.06G114100/Glyma.12G080900…	29
12 h	00230	Purine metabolism	64/4185	168/14423	0.00675024	0.0448216	0.0372329	Glyma.05G146000/Glyma.16G173100/Glyma.04G065800/Glyma.10G121524/Glyma.19G182400/Glyma.02G182400/Glyma.05G000700/Glyma.09G126300/Glyma.10G201100/Glyma.15G073000/Glyma.14G115700/Glyma.03G189700/Glyma.10G241000/Glyma.15G106200/Glyma.19G000700/Glyma.10G178900/Glyma.03G109500/Glyma.06G148500/Glyma.06G067200/Glyma.07G258900/Glyma.09G064600/Glyma.17G128300/Glyma.11G047900/Glyma.20G211200/Glyma.18G036300…	64
16 h	03009	Ribosome biogenesis	207/3832	469/14423	5.90396e-17	9.85962e-15	8.14125e-15	Glyma.02G205600/Glyma.08G081400/Glyma.14G013102/Glyma.17G072400/Glyma.11G155468/Glyma.19G110900/Glyma.06G071900/Glyma.13G362700/Glyma.15G056100/Glyma.16G041400/Glyma.04G200700/Glyma.20G235400/Glyma.13G107200/Glyma.08G176900/Glyma.10G200300/Glyma.11G073200/Glyma.04G069900/Glyma.12G028500/Glyma.11G103700/Glyma.10G022600/Glyma.17G128400/Glyma.05G046400/Glyma.14G115100/Glyma.11G249500/Glyma.14G068600…	207
16 h	03008	Ribosome biogenesis in eukaryotes	76/3832	147/14423	6.75482e-11	5.64028e-09	4.65727e-09	Glyma.19G110900/Glyma.13G362700/Glyma.15G056100/Glyma.16G041400/Glyma.04G200700/Glyma.08G176900/Glyma.10G022600/Glyma.17G128400/Glyma.05G046400/Glyma.19G165900/Glyma.18G020000/Glyma.02G151500/Glyma.07G261900/Glyma.11G114300/Glyma.20G161600/Glyma.14G196700/Glyma.08G013300/Glyma.04G139900/Glyma.14G024600/Glyma.17G029800/Glyma.16G071100/Glyma.12G040200/Glyma.11G152600/Glyma.02G290200/Glyma.05G206400…	76
16 h	03032	DNA replication proteins	96/3832	221/14423	3.6672e-08	2.04141e-06	1.68562e-06	Glyma.11G184100/Glyma.11G070700/Glyma.12G088300/Glyma.13G031500/Glyma.18G157402/Glyma.14G154200/Glyma.04G071600/Glyma.06G116100/Glyma.15G276000/Glyma.03G161300/Glyma.08G310900/Glyma.07G100600/Glyma.19G110900/Glyma.04G246600/Glyma.13G122100/Glyma.09G258700/Glyma.06G072900/Glyma.15G056100/Glyma.16G041400/Glyma.19G216100/Glyma.11G083600/Glyma.04G043600/Glyma.17G104000/Glyma.07G034100/Glyma.20G084000…	96
16 h	09124	Replication and repair	102/3832	241/14423	6.91461e-08	2.88685e-06	2.38372e-06	Glyma.11G184100/Glyma.11G070700/Glyma.12G088300/Glyma.18G157402/Glyma.03G161300/Glyma.02G261800/Glyma.07G100600/Glyma.15G265200/Glyma.08G232900/Glyma.09G189100/Glyma.07G087700/Glyma.15G217300/Glyma.19G216100/Glyma.01G158400/Glyma.17G073900/Glyma.U027200/Glyma.17G104000/Glyma.17G035000/Glyma.17G078700/Glyma.08G120900/Glyma.09G047300/Glyma.05G129700/Glyma.15G092000/Glyma.13G220400/Glyma.04G248900/G…	102
16 h	03030	DNA replication	44/3832	87/14423	1.47597e-06	4.92972e-05	4.07056e-05	Glyma.11G070700/Glyma.18G157402/Glyma.19G216100/Glyma.17G104000/Glyma.17G035000/Glyma.17G078700/Glyma.09G047300/Glyma.05G129700/Glyma.04G248900/Glyma.03G219200/Glyma.12G039200/Glyma.18G067800/Glyma.07G238400/Glyma.20G111700/Glyma.08G084400/Glyma.15G154900/Glyma.05G014200/Glyma.09G213500/Glyma.11G113300/Glyma.14G133400/Glyma.12G096100/Glyma.17G202200/Glyma.17G130800/Glyma.06G310500/Glyma.13G156400…	44
16 h	04812	Cytoskeleton proteins	117/3832	311/14423	1.05831e-05	0.000294562	0.000243225	Glyma.05G149700/Glyma.08G106400/Glyma.09G136400/Glyma.10G182800/Glyma.12G191000/Glyma.11G052200/Glyma.10G154200/Glyma.01G021200/Glyma.15G150100/Glyma.13G133200/Glyma.02G302800/Glyma.10G045500/Glyma.15G063200/Glyma.02G135700/Glyma.13G310700/Glyma.20G159200/Glyma.20G207200/Glyma.15G020700/Glyma.20G234100/Glyma.18G180900/Glyma.18G073500/Glyma.19G137500/Glyma.20G234200/Glyma.11G253200/Glyma.08G174300…	117
16 h	03013	RNA transport	99/3832	271/14423	0.000177702	0.00423946	0.00350059	Glyma.13G148200/Glyma.19G188700/Glyma.16G160800/Glyma.01G224700/Glyma.19G240700/Glyma.02G206900/Glyma.17G071100/Glyma.14G051300/Glyma.13G363900/Glyma.20G171200/Glyma.15G097500/Glyma.06G041700/Glyma.04G040700/Glyma.15G010000/Glyma.05G114900/Glyma.04G074200/Glyma.18G133400/Glyma.03G106500/Glyma.07G117800/Glyma.02G147200/Glyma.03G002400/Glyma.16G071100/Glyma.08G172000/Glyma.13G232100/Glyma.05G003500…	99
16 h	03430	Mismatch repair	31/3832	65/14423	0.000206167	0.00426262	0.00351971	Glyma.11G070700/Glyma.07G100600/Glyma.09G189100/Glyma.07G087700/Glyma.01G158400/Glyma.17G078700/Glyma.08G120900/Glyma.04G248900/Glyma.05G163700/Glyma.17G121400/Glyma.18G067800/Glyma.20G111700/Glyma.05G014200/Glyma.09G213500/Glyma.14G133400/Glyma.12G096100/Glyma.17G202200/Glyma.17G130800/Glyma.08G079500/Glyma.08G334900/Glyma.04G210700/Glyma.01G030600/Glyma.06G155300/Glyma.12G206200/Glyma.10G019200…	31
16 h	00061	Fatty acid biosynthesis	38/3832	85/14423	0.000229722	0.00426262	0.00351971	Glyma.14G121400/Glyma.13G038600/Glyma.19G028800/Glyma.06G112900/Glyma.13G057400/Glyma.18G265300/Glyma.05G129600/Glyma.07G207200/Glyma.08G345900/Glyma.11G101400/Glyma.12G027300/Glyma.08G084300/Glyma.08G349200/Glyma.15G052500/Glyma.02G138100/Glyma.18G057700/Glyma.08G024700/Glyma.18G167300/Glyma.08G179900/Glyma.13G079900/Glyma.18G156100/Glyma.18G243500/Glyma.05G216600/Glyma.05G221100/Glyma.08G027600…	38
16 h	03060	Protein export	39/3832	90/14423	0.000418059	0.00698158	0.00576481	Glyma.08G284800/Glyma.06G227200/Glyma.03G034100/Glyma.08G025700/Glyma.12G171400/Glyma.10G156400/Glyma.12G070500/Glyma.03G239600/Glyma.12G156800/Glyma.01G133400/Glyma.10G156000/Glyma.05G219400/Glyma.08G025900/Glyma.08G336000/Glyma.14G053200/Glyma.05G146700/Glyma.08G103600/Glyma.12G230900/Glyma.13G268600/Glyma.02G258900/Glyma.08G101100/Glyma.13G327801/Glyma.05G144700/Glyma.02G141101/Glyma.11G249600…	39
16 h	03110	Chaperones and folding catalysts	164/3832	494/14423	0.000527104	0.0080024	0.00660772	Glyma.02G076600/Glyma.14G063700/Glyma.02G252800/Glyma.15G077700/Glyma.02G205600/Glyma.16G052800/Glyma.02G187800/Glyma.08G212000/Glyma.10G195200/Glyma.17G072400/Glyma.19G096600/Glyma.03G232000/Glyma.20G240000/Glyma.13G077300/Glyma.16G012000/Glyma.04G247900/Glyma.14G063800/Glyma.12G210100/Glyma.20G215100/Glyma.06G073300/Glyma.15G264600/Glyma.14G196900/Glyma.13G176000/Glyma.01G238600/Glyma.08G192700…	164
16 h	00333	Prodigiosin biosynthesis	8/3832	10/14423	0.000649767	0.0087669	0.00723898	Glyma.08G345900/Glyma.11G101400/Glyma.12G027300/Glyma.18G057700/Glyma.18G156100/Glyma.18G009200/Glyma.11G248000/Glyma.11G164500	8
16 h	03410	Base excision repair	29/3832	63/14423	0.000682453	0.0087669	0.00723898	Glyma.11G184100/Glyma.12G088300/Glyma.18G157402/Glyma.03G161300/Glyma.15G265200/Glyma.08G232900/Glyma.15G217300/Glyma.17G073900/Glyma.13G366800/Glyma.18G067800/Glyma.02G203900/Glyma.06G219600/Glyma.U031407/Glyma.19G149400/Glyma.02G191100/Glyma.08G079500/Glyma.14G025300/Glyma.15G013100/Glyma.08G334900/Glyma.10G141800/Glyma.04G210700/Glyma.06G155300/Glyma.12G231200/Glyma.19G147500/Glyma.13G360800/G…	29
16 h	03018	RNA degradation	70/3832	188/14423	0.000813425	0.009703	0.00801193	Glyma.13G148200/Glyma.19G188700/Glyma.09G261400/Glyma.16G160800/Glyma.14G021500/Glyma.02G293100/Glyma.08G199800/Glyma.07G269500/Glyma.06G208200/Glyma.12G239000/Glyma.08G192700/Glyma.17G052100/Glyma.06G088600/Glyma.20G171200/Glyma.18G092700/Glyma.06G041700/Glyma.04G040700/Glyma.02G112000/Glyma.09G261100/Glyma.13G107300/Glyma.09G115600/Glyma.05G149300/Glyma.05G127900/Glyma.20G122600/Glyma.17G102000…	70
16 h	03051	03051	62/3832	164/14423	0.00100992	0.0112437	0.00928413	Glyma.02G205600/Glyma.17G072400/Glyma.06G236100/Glyma.01G055500/Glyma.08G223800/Glyma.08G013300/Glyma.05G206400/Glyma.07G155700/Glyma.14G011600/Glyma.14G071000/Glyma.18G074100/Glyma.13G371600/Glyma.07G002800/Glyma.17G253600/Glyma.07G170800/Glyma.08G332900/Glyma.18G297400/Glyma.18G072700/Glyma.08G048800/Glyma.17G252100/Glyma.03G170600/Glyma.19G172200/Glyma.02G187100/Glyma.18G206200/Glyma.13G031200…	62
16 h	00220	Arginine biosynthesis	26/3832	56/14423	0.00108468	0.0113213	0.00934823	Glyma.05G146000/Glyma.01G204600/Glyma.19G111000/Glyma.05G046900/Glyma.16G153400/Glyma.14G213300/Glyma.10G044300/Glyma.11G047200/Glyma.01G131100/Glyma.04G094600/Glyma.07G179700/Glyma.01G194700/Glyma.17G128600/Glyma.06G096700/Glyma.20G009400/Glyma.11G043300/Glyma.20G000500/Glyma.05G046700/Glyma.04G073800/Glyma.07G104500/Glyma.05G066200/Glyma.05G236000/Glyma.04G030500/Glyma.06G082400/Glyma.06G030600…	26
16 h	00250	Alanine, aspartate and glutamate metabolism	39/3832	94/14423	0.00116298	0.0114246	0.00943346	Glyma.04G042100/Glyma.06G043000/Glyma.01G204600/Glyma.19G111000/Glyma.02G293500/Glyma.14G021000/Glyma.05G046900/Glyma.16G153400/Glyma.18G210500/Glyma.05G182600/Glyma.17G238200/Glyma.14G213300/Glyma.11G240200/Glyma.01G131100/Glyma.14G162300/Glyma.04G094600/Glyma.19G065600/Glyma.15G263500/Glyma.13G328600/Glyma.18G017200/Glyma.04G216000/Glyma.17G128600/Glyma.06G096700/Glyma.08G163700/Glyma.02G241400…	39
16 h	00780	Biotin metabolism	14/3832	26/14423	0.00283698	0.0263208	0.0217336	Glyma.05G129600/Glyma.08G345900/Glyma.11G101400/Glyma.12G027300/Glyma.08G084300/Glyma.15G052500/Glyma.08G024700/Glyma.08G179900/Glyma.18G156100/Glyma.18G009200/Glyma.11G248000/Glyma.13G128000/Glyma.17G047000/Glyma.06G109600	14
16 h	00010	Glycolysis / Gluconeogenesis	84/3832	243/14423	0.00335621	0.0294993	0.0243581	Glyma.13G035200/Glyma.01G116700/Glyma.10G041000/Glyma.19G078300/Glyma.01G118000/Glyma.14G121200/Glyma.06G032500/Glyma.06G105600/Glyma.16G173100/Glyma.08G199800/Glyma.07G269500/Glyma.03G189700/Glyma.05G058100/Glyma.01G019200/Glyma.05G080500/Glyma.18G200300/Glyma.06G208200/Glyma.06G122600/Glyma.05G000700/Glyma.09G126300/Glyma.07G241600/Glyma.10G241000/Glyma.15G143100/Glyma.10G178900/Glyma.18G137300…	84
16 h	09104	Nucleotide metabolism	82/3832	239/14423	0.0046575	0.0388901	0.0321122	Glyma.05G146000/Glyma.02G293500/Glyma.14G021000/Glyma.10G121524/Glyma.15G217500/Glyma.03G089400/Glyma.19G182400/Glyma.11G115200/Glyma.16G173100/Glyma.08G232600/Glyma.15G073000/Glyma.04G065800/Glyma.02G182400/Glyma.03G189700/Glyma.14G115700/Glyma.11G047900/Glyma.05G000700/Glyma.09G126300/Glyma.10G241000/Glyma.15G106200/Glyma.10G178900/Glyma.01G210800/Glyma.13G240500/Glyma.07G258900/Glyma.05G045200…	82
16 h	03420	Nucleotide excision repair	42/3832	110/14423	0.0049577	0.0394256	0.0325544	Glyma.11G070700/Glyma.18G157402/Glyma.17G078700/Glyma.04G248900/Glyma.08G223800/Glyma.18G067800/Glyma.06G046400/Glyma.20G111700/Glyma.09G213500/Glyma.14G133400/Glyma.12G096100/Glyma.17G202200/Glyma.17G130800/Glyma.13G371600/Glyma.08G096100/Glyma.07G002800/Glyma.19G036900/Glyma.18G297400/Glyma.08G079500/Glyma.05G140800/Glyma.14G025300/Glyma.08G334900/Glyma.04G210700/Glyma.01G030600/Glyma.06G155300…	42
16 h	00230	Purine metabolism	60/3832	168/14423	0.00544062	0.0412993	0.0341015	Glyma.05G146000/Glyma.10G121524/Glyma.19G182400/Glyma.16G173100/Glyma.15G073000/Glyma.04G065800/Glyma.02G182400/Glyma.03G189700/Glyma.14G115700/Glyma.11G047900/Glyma.05G000700/Glyma.09G126300/Glyma.10G241000/Glyma.15G106200/Glyma.10G178900/Glyma.01G210800/Glyma.13G240500/Glyma.07G258900/Glyma.05G045200/Glyma.10G100800/Glyma.10G201100/Glyma.10G156900/Glyma.06G067200/Glyma.19G000700/Glyma.03G109500…	60
20 h	03009	Ribosome biogenesis	280/4198	469/14423	1.4453e-44	2.41365e-42	1.88649e-42	Glyma.02G205600/Glyma.08G081400/Glyma.14G013102/Glyma.17G072400/Glyma.19G110900/Glyma.15G056100/Glyma.10G022600/Glyma.09G023100/Glyma.16G041400/Glyma.18G020000/Glyma.11G152600/Glyma.14G115100/Glyma.18G287900/Glyma.02G151500/Glyma.08G173300/Glyma.04G200700/Glyma.04G139900/Glyma.15G254100/Glyma.08G176900/Glyma.08G313100/Glyma.04G069900/Glyma.16G012100/Glyma.17G029800/Glyma.11G101500/Glyma.11G114300…	280
20 h	03008	Ribosome biogenesis in eukaryotes	97/4198	147/14423	1.56335e-20	1.3054e-18	1.02029e-18	Glyma.19G110900/Glyma.15G056100/Glyma.10G022600/Glyma.16G041400/Glyma.18G020000/Glyma.11G152600/Glyma.02G151500/Glyma.04G200700/Glyma.04G139900/Glyma.08G176900/Glyma.17G029800/Glyma.11G114300/Glyma.17G128400/Glyma.08G013300/Glyma.12G095400/Glyma.05G046400/Glyma.19G186600/Glyma.07G032500/Glyma.02G290200/Glyma.17G233900/Glyma.14G089042/Glyma.17G115400/Glyma.16G071100/Glyma.09G084600/Glyma.07G261900…	97
20 h	03013	RNA transport	134/4198	271/14423	9.31315e-13	5.18432e-11	4.05204e-11	Glyma.16G160800/Glyma.13G148200/Glyma.19G188700/Glyma.01G224700/Glyma.02G206900/Glyma.19G240700/Glyma.04G074200/Glyma.05G114900/Glyma.03G106500/Glyma.02G266200/Glyma.20G171200/Glyma.13G363900/Glyma.15G010000/Glyma.15G075100/Glyma.04G040700/Glyma.16G071100/Glyma.06G041700/Glyma.03G002400/Glyma.06G222100/Glyma.15G097500/Glyma.07G117800/Glyma.16G068000/Glyma.11G213900/Glyma.03G206400/Glyma.14G051300…	134
20 h	03012	Translation factors	122/4198	247/14423	1.06777e-11	4.45795e-10	3.48431e-10	Glyma.09G275000/Glyma.13G073200/Glyma.02G276600/Glyma.16G001900/Glyma.06G082500/Glyma.04G080800/Glyma.18G107500/Glyma.09G046000/Glyma.05G114900/Glyma.03G106500/Glyma.15G075100/Glyma.01G054000/Glyma.12G165301/Glyma.08G170000/Glyma.03G002400/Glyma.04G195100/Glyma.07G117800/Glyma.16G068000/Glyma.03G206400/Glyma.18G133400/Glyma.06G170900/Glyma.08G046300/Glyma.08G290700/Glyma.14G039100/Glyma.15G259600…	122
20 h	03040	Spliceosome	142/4198	310/14423	2.35138e-10	7.8536e-09	6.13833e-09	Glyma.02G205600/Glyma.17G072400/Glyma.18G287900/Glyma.07G205500/Glyma.17G115400/Glyma.07G252700/Glyma.14G068500/Glyma.12G239000/Glyma.15G097500/Glyma.20G084000/Glyma.04G208600/Glyma.14G025900/Glyma.07G170800/Glyma.11G199100/Glyma.09G007700/Glyma.14G196700/Glyma.18G266500/Glyma.03G152100/Glyma.05G149300/Glyma.07G130900/Glyma.15G007100/Glyma.15G216300/Glyma.19G114900/Glyma.03G143400/Glyma.10G255700…	142
20 h	03051	03051	83/4198	164/14423	4.90547e-09	1.36536e-07	1.06715e-07	Glyma.02G205600/Glyma.17G072400/Glyma.06G236100/Glyma.18G287900/Glyma.08G013300/Glyma.01G055500/Glyma.05G206400/Glyma.18G297400/Glyma.08G223800/Glyma.07G170800/Glyma.18G074100/Glyma.18G029800/Glyma.14G011600/Glyma.08G337600/Glyma.04G078200/Glyma.03G170600/Glyma.18G072700/Glyma.08G332900/Glyma.05G079000/Glyma.11G199900/Glyma.17G127100/Glyma.20G114700/Glyma.10G043000/Glyma.07G155700/Glyma.08G286200…	83
20 h	03032	DNA replication proteins	101/4198	221/14423	1.0446e-07	2.49211e-06	1.94782e-06	Glyma.11G184100/Glyma.11G070700/Glyma.12G088300/Glyma.18G157402/Glyma.14G154200/Glyma.03G161300/Glyma.06G116100/Glyma.13G031500/Glyma.19G110900/Glyma.15G056100/Glyma.04G246600/Glyma.15G276000/Glyma.08G310900/Glyma.18G067800/Glyma.13G122100/Glyma.16G041400/Glyma.10G035700/Glyma.12G039200/Glyma.05G020600/Glyma.07G105000/Glyma.11G113300/Glyma.04G248900/Glyma.17G078700/Glyma.08G176900/Glyma.09G047300…	101
20 h	03050	Proteasome	53/4198	105/14423	3.12417e-06	6.52169e-05	5.09732e-05	Glyma.18G029800/Glyma.04G078200/Glyma.03G170600/Glyma.05G079000/Glyma.11G199900/Glyma.17G127100/Glyma.10G043000/Glyma.07G155700/Glyma.08G286200/Glyma.18G050900/Glyma.08G048800/Glyma.17G252100/Glyma.04G249300/Glyma.10G295600/Glyma.09G161300/Glyma.11G227700/Glyma.10G279900/Glyma.06G219200/Glyma.06G021600/Glyma.13G031200/Glyma.18G071500/Glyma.16G126300/Glyma.04G077400/Glyma.18G206200/Glyma.18G138900…	53
20 h	09124	Replication and repair	102/4198	241/14423	7.09493e-06	0.00013165	0.000102897	Glyma.11G184100/Glyma.11G070700/Glyma.12G088300/Glyma.18G157402/Glyma.03G161300/Glyma.02G261800/Glyma.15G092000/Glyma.15G265200/Glyma.18G067800/Glyma.09G189100/Glyma.U032008/Glyma.12G039200/Glyma.05G020600/Glyma.15G217300/Glyma.13G220400/Glyma.11G113300/Glyma.04G248900/Glyma.17G078700/Glyma.01G158400/Glyma.08G232900/Glyma.09G047300/Glyma.17G035000/Glyma.17G121400/Glyma.07G238400/Glyma.15G154900/G…	102
20 h	09121	Transcription	177/4198	465/14423	1.50252e-05	0.00025092	0.000196118	Glyma.02G205600/Glyma.17G072400/Glyma.17G050400/Glyma.03G129500/Glyma.18G287900/Glyma.07G205500/Glyma.17G115400/Glyma.18G281100/Glyma.07G252700/Glyma.14G068500/Glyma.12G239000/Glyma.15G097500/Glyma.20G084000/Glyma.11G066900/Glyma.04G208600/Glyma.14G025900/Glyma.07G170800/Glyma.18G212300/Glyma.10G095200/Glyma.11G199100/Glyma.09G007700/Glyma.14G196700/Glyma.18G266500/Glyma.03G152100/Glyma.09G066000…	177
20 h	03030	DNA replication	44/4198	87/14423	1.96479e-05	0.000298291	0.000233143	Glyma.11G070700/Glyma.18G157402/Glyma.18G067800/Glyma.12G039200/Glyma.05G020600/Glyma.11G113300/Glyma.04G248900/Glyma.17G078700/Glyma.09G047300/Glyma.17G035000/Glyma.07G238400/Glyma.15G154900/Glyma.02G286600/Glyma.17G104000/Glyma.08G313400/Glyma.14G133400/Glyma.05G129700/Glyma.03G219200/Glyma.09G213500/Glyma.07G200900/Glyma.08G084400/Glyma.06G310500/Glyma.19G216100/Glyma.17G202200/Glyma.14G025300…	44
20 h	00196	Photosynthesis - antenna proteins	21/4198	33/14423	3.96274e-05	0.000551481	0.000431034	Glyma.02G305400/Glyma.16G165200/Glyma.13G282000/Glyma.16G165500/Glyma.12G219300/Glyma.05G128000/Glyma.08G074000/Glyma.14G008000/Glyma.20G212900/Glyma.08G082900/Glyma.01G115900/Glyma.16G145800/Glyma.16G165800/Glyma.09G154700/Glyma.03G060300/Glyma.02G309500/Glyma.10G177200/Glyma.16G016100/Glyma.08G180000/Glyma.15G052400/Glyma.03G262300	21
20 h	04812	Cytoskeleton proteins	120/4198	311/14423	0.000178049	0.00216387	0.00169127	Glyma.05G149700/Glyma.08G106400/Glyma.10G182800/Glyma.15G150100/Glyma.12G191000/Glyma.09G136400/Glyma.08G041200/Glyma.18G082000/Glyma.11G253200/Glyma.18G180900/Glyma.19G235400/Glyma.03G237700/Glyma.20G159200/Glyma.20G234100/Glyma.01G021200/Glyma.02G302800/Glyma.13G310700/Glyma.20G207200/Glyma.19G137500/Glyma.02G135700/Glyma.20G234200/Glyma.15G063200/Glyma.10G045500/Glyma.13G133200/Glyma.02G296800…	120
20 h	00660	C5-Branched dibasic acid metabolism	11/4198	14/14423	0.000181402	0.00216387	0.00169127	Glyma.05G167700/Glyma.14G217300/Glyma.11G079000/Glyma.13G367900/Glyma.08G126100/Glyma.15G072500/Glyma.06G169700/Glyma.13G241000/Glyma.08G210500/Glyma.17G256102/Glyma.15G005400	11
20 h	00220	Arginine biosynthesis	29/4198	56/14423	0.000295308	0.00317652	0.00248275	Glyma.05G146000/Glyma.01G204600/Glyma.19G111000/Glyma.01G131100/Glyma.05G046900/Glyma.11G047200/Glyma.10G044300/Glyma.14G213300/Glyma.04G073800/Glyma.07G179700/Glyma.05G046700/Glyma.17G128600/Glyma.06G096700/Glyma.11G043300/Glyma.01G194700/Glyma.06G082400/Glyma.07G104500/Glyma.20G009400/Glyma.04G094600/Glyma.05G236000/Glyma.17G216000/Glyma.14G111800/Glyma.20G000500/Glyma.06G030600/Glyma.04G030500…	29
20 h	03060	Protein export	42/4198	90/14423	0.000304337	0.00317652	0.00248275	Glyma.06G227200/Glyma.08G025700/Glyma.12G070500/Glyma.12G156800/Glyma.08G284800/Glyma.05G219400/Glyma.12G171400/Glyma.08G025900/Glyma.03G239600/Glyma.08G336000/Glyma.13G327801/Glyma.08G101100/Glyma.12G230900/Glyma.05G144700/Glyma.03G034100/Glyma.10G156000/Glyma.13G268600/Glyma.05G200600/Glyma.05G146700/Glyma.18G071100/Glyma.08G103600/Glyma.08G008000/Glyma.01G133400/Glyma.10G156400/Glyma.14G053200…	42
20 h	00970	Aminoacyl-tRNA biosynthesis	38/4198	80/14423	0.000373177	0.00366592	0.00286526	Glyma.03G089300/Glyma.20G090100/Glyma.11G034100/Glyma.01G208100/Glyma.10G141500/Glyma.13G000200/Glyma.01G032500/Glyma.12G020700/Glyma.10G239500/Glyma.08G031100/Glyma.13G152678/Glyma.12G043200/Glyma.11G117800/Glyma.05G224000/Glyma.08G363700/Glyma.05G234900/Glyma.10G272800/Glyma.10G155000/Glyma.10G289600/Glyma.20G233300/Glyma.03G224500/Glyma.01G006400/Glyma.11G094300/Glyma.17G223600/Glyma.14G101500…	38
20 h	04141	Protein processing in endoplasmic reticulum	140/4198	379/14423	0.000521446	0.00483786	0.00378125	Glyma.02G076600/Glyma.02G252800/Glyma.14G063700/Glyma.02G205600/Glyma.04G186000/Glyma.06G180000/Glyma.08G212000/Glyma.17G072400/Glyma.03G232000/Glyma.04G247900/Glyma.07G200000/Glyma.11G146800/Glyma.13G077300/Glyma.18G094600/Glyma.06G227200/Glyma.06G114800/Glyma.20G065900/Glyma.13G176000/Glyma.14G063800/Glyma.16G050800/Glyma.07G200200/Glyma.08G025700/Glyma.12G070500/Glyma.04G202900/Glyma.20G015900…	140
20 h	00061	Fatty acid biosynthesis	39/4198	85/14423	0.000745184	0.00654977	0.00511927	Glyma.13G038600/Glyma.14G121400/Glyma.19G028800/Glyma.06G112900/Glyma.18G265300/Glyma.13G057400/Glyma.02G138100/Glyma.10G010800/Glyma.11G101400/Glyma.05G129600/Glyma.15G052500/Glyma.08G345900/Glyma.13G079900/Glyma.07G207200/Glyma.08G084300/Glyma.18G156100/Glyma.18G057700/Glyma.11G164500/Glyma.18G243500/Glyma.05G216600/Glyma.12G027300/Glyma.08G349200/Glyma.18G009200/Glyma.05G221100/Glyma.09G277400…	39
20 h	00300	Lysine biosynthesis	13/4198	20/14423	0.000926258	0.00773425	0.00604505	Glyma.16G028900/Glyma.09G268200/Glyma.08G063500/Glyma.18G221700/Glyma.07G060300/Glyma.05G240700/Glyma.05G151100/Glyma.08G107800/Glyma.03G181200/Glyma.08G047800/Glyma.07G185700/Glyma.19G182000/Glyma.19G174300	13
20 h	03016	Transfer RNA biogenesis	112/4198	299/14423	0.00102312	0.00813625	0.00635925	Glyma.02G107900/Glyma.03G089300/Glyma.19G240700/Glyma.08G090700/Glyma.20G090100/Glyma.05G114900/Glyma.11G034100/Glyma.02G266200/Glyma.01G208100/Glyma.10G141500/Glyma.06G142400/Glyma.13G000200/Glyma.16G071100/Glyma.01G032500/Glyma.12G020700/Glyma.10G239500/Glyma.16G068000/Glyma.14G051300/Glyma.19G263400/Glyma.01G226800/Glyma.08G031100/Glyma.13G152678/Glyma.08G075600/Glyma.05G121000/Glyma.12G043200…	112
20 h	00290	Valine, leucine and isoleucine biosynthesis	20/4198	37/14423	0.00126408	0.00922702	0.00721179	Glyma.07G186000/Glyma.07G186100/Glyma.05G167700/Glyma.13G291300/Glyma.20G245300/Glyma.14G217300/Glyma.11G045300/Glyma.11G079000/Glyma.13G367900/Glyma.08G126100/Glyma.15G072500/Glyma.06G169700/Glyma.12G210000/Glyma.13G241000/Glyma.10G295400/Glyma.08G210500/Glyma.17G256102/Glyma.15G005400/Glyma.13G207900/Glyma.12G122900	20
20 h	00333	Prodigiosin biosynthesis	8/4198	10/14423	0.00127079	0.00922702	0.00721179	Glyma.11G101400/Glyma.08G345900/Glyma.18G156100/Glyma.18G057700/Glyma.11G164500/Glyma.12G027300/Glyma.18G009200/Glyma.11G248000	8
20 h	00010	Glycolysis / Gluconeogenesis	92/4198	243/14423	0.00189064	0.0131557	0.0102825	Glyma.13G035200/Glyma.01G118000/Glyma.14G121200/Glyma.01G116700/Glyma.10G041000/Glyma.08G200600/Glyma.06G122600/Glyma.16G173100/Glyma.07G269500/Glyma.05G058100/Glyma.03G189700/Glyma.01G019200/Glyma.08G199800/Glyma.18G009700/Glyma.18G257700/Glyma.18G200300/Glyma.05G000700/Glyma.09G126300/Glyma.06G088600/Glyma.07G241600/Glyma.19G000700/Glyma.06G208200/Glyma.06G032500/Glyma.13G231700/Glyma.10G241000…	92
20 h	03018	RNA degradation	73/4198	188/14423	0.00249503	0.0160894	0.0125754	Glyma.16G160800/Glyma.14G021500/Glyma.07G269500/Glyma.13G148200/Glyma.19G188700/Glyma.08G199800/Glyma.06G088600/Glyma.06G208200/Glyma.02G293100/Glyma.17G052100/Glyma.08G192700/Glyma.04G086900/Glyma.16G204600/Glyma.02G112000/Glyma.20G171200/Glyma.10G127800/Glyma.04G040700/Glyma.13G107300/Glyma.06G041700/Glyma.18G092700/Glyma.12G239000/Glyma.13G254900/Glyma.07G009600/Glyma.10G193200/Glyma.09G261100…	73
20 h	01007	Amino acid related enzymes	57/4198	141/14423	0.00251035	0.0160894	0.0125754	Glyma.07G186000/Glyma.07G186100/Glyma.01G131100/Glyma.18G210500/Glyma.03G089300/Glyma.05G182600/Glyma.08G063500/Glyma.06G235500/Glyma.20G090100/Glyma.11G034100/Glyma.01G208100/Glyma.10G141500/Glyma.13G000200/Glyma.11G045300/Glyma.01G032500/Glyma.12G020700/Glyma.10G239500/Glyma.06G082400/Glyma.08G031100/Glyma.13G152678/Glyma.12G043200/Glyma.11G117800/Glyma.05G224000/Glyma.08G363700/Glyma.05G234900…	57
20 h	03430	Mismatch repair	30/4198	65/14423	0.00260127	0.0160894	0.0125754	Glyma.11G070700/Glyma.18G067800/Glyma.09G189100/Glyma.05G020600/Glyma.04G248900/Glyma.17G078700/Glyma.01G158400/Glyma.17G121400/Glyma.08G120900/Glyma.14G133400/Glyma.09G213500/Glyma.07G200900/Glyma.07G087700/Glyma.17G202200/Glyma.05G163700/Glyma.10G278800/Glyma.12G096100/Glyma.06G155300/Glyma.08G334900/Glyma.12G231200/Glyma.05G089100/Glyma.08G079500/Glyma.12G080900/Glyma.06G114100/Glyma.12G206200…	30
20 h	03410	Base excision repair	29/4198	63/14423	0.00319294	0.0190436	0.0148844	Glyma.11G184100/Glyma.12G088300/Glyma.18G157402/Glyma.03G161300/Glyma.15G265200/Glyma.18G067800/Glyma.15G217300/Glyma.08G232900/Glyma.08G313400/Glyma.13G366800/Glyma.14G025300/Glyma.10G141800/Glyma.02G191100/Glyma.06G155300/Glyma.08G334900/Glyma.20G090300/Glyma.12G231200/Glyma.08G079500/Glyma.17G073900/Glyma.12G080900/Glyma.15G013100/Glyma.07G059700/Glyma.U031407/Glyma.04G031600/Glyma.19G149400/G…	29
20 h	00250	Alanine, aspartate and glutamate metabolism	40/4198	94/14423	0.00362689	0.0208859	0.0163243	Glyma.06G043000/Glyma.04G042100/Glyma.01G204600/Glyma.19G111000/Glyma.14G021000/Glyma.02G293500/Glyma.01G131100/Glyma.05G046900/Glyma.18G210500/Glyma.11G240200/Glyma.14G213300/Glyma.13G328600/Glyma.05G182600/Glyma.14G162300/Glyma.09G222700/Glyma.15G263500/Glyma.08G163700/Glyma.15G045100/Glyma.05G046700/Glyma.17G128600/Glyma.18G017200/Glyma.06G096700/Glyma.19G065600/Glyma.12G036200/Glyma.09G249100…	40
20 h	02048	Prokaryotic defense system	12/4198	20/14423	0.00388203	0.0213004	0.0166482	Glyma.20G090100/Glyma.10G141500/Glyma.18G089400/Glyma.04G187600/Glyma.01G007800/Glyma.11G083600/Glyma.08G322800/Glyma.14G017600/Glyma.10G071800/Glyma.03G195200/Glyma.19G194800/Glyma.02G295800	12
20 h	03110	Chaperones and folding catalysts	171/4198	494/14423	0.00395396	0.0213004	0.0166482	Glyma.02G076600/Glyma.02G252800/Glyma.14G063700/Glyma.02G205600/Glyma.15G077700/Glyma.19G096600/Glyma.10G195200/Glyma.08G212000/Glyma.16G052800/Glyma.17G072400/Glyma.02G187800/Glyma.20G240000/Glyma.03G232000/Glyma.04G247900/Glyma.07G200000/Glyma.11G146800/Glyma.13G077300/Glyma.18G094600/Glyma.06G114800/Glyma.20G065900/Glyma.13G176000/Glyma.14G063800/Glyma.07G200200/Glyma.12G136400/Glyma.03G129600…	171
20 h	00230	Purine metabolism	65/4198	168/14423	0.00457292	0.0238649	0.0186527	Glyma.05G146000/Glyma.10G121524/Glyma.19G182400/Glyma.16G173100/Glyma.02G182400/Glyma.03G189700/Glyma.04G065800/Glyma.11G047900/Glyma.05G000700/Glyma.09G126300/Glyma.14G115700/Glyma.15G073000/Glyma.19G000700/Glyma.10G241000/Glyma.10G178900/Glyma.10G201100/Glyma.07G258900/Glyma.03G109500/Glyma.10G156900/Glyma.01G210800/Glyma.09G222700/Glyma.18G036300/Glyma.15G106200/Glyma.10G100800/Glyma.08G164100…	65
20 h	09104	Nucleotide metabolism	88/4198	239/14423	0.00572353	0.0289645	0.0226385	Glyma.05G146000/Glyma.10G121524/Glyma.14G021000/Glyma.02G293500/Glyma.15G217500/Glyma.03G089400/Glyma.08G232600/Glyma.19G182400/Glyma.16G173100/Glyma.02G182400/Glyma.03G189700/Glyma.04G065800/Glyma.11G047900/Glyma.05G000700/Glyma.09G126300/Glyma.14G115700/Glyma.15G073000/Glyma.19G000700/Glyma.10G241000/Glyma.10G178900/Glyma.10G201100/Glyma.07G258900/Glyma.13G328600/Glyma.03G109500/Glyma.10G156900…	88

## Sheet: Gmgrf5a-Up
Cluster	ID	Description	GeneRatio	BgRatio	pvalue	p.adjust	qvalue	geneID	Count
0 h	03009	Ribosome biogenesis	260/4171	469/14423	2.91083e-34	4.86108e-32	3.89132e-32	Glyma.02G205600/Glyma.14G013102/Glyma.17G072400/Glyma.15G056100/Glyma.18G020000/Glyma.16G041400/Glyma.19G110900/Glyma.10G022600/Glyma.04G200700/Glyma.09G023100/Glyma.11G152600/Glyma.19G165900/Glyma.08G058500/Glyma.11G101500/Glyma.17G128400/Glyma.07G032500/Glyma.15G254100/Glyma.08G176900/Glyma.11G237200/Glyma.18G275100/Glyma.11G114300/Glyma.08G313100/Glyma.18G075000/Glyma.10G200300/Glyma.16G012100…	260		Up-regulated' means that gene expressions were increased in seeds, compared to pod walls
0 h	03032	DNA replication proteins	123/4171	221/14423	5.61336e-17	4.68715e-15	3.75209e-15	Glyma.11G184100/Glyma.12G088300/Glyma.11G070700/Glyma.09G258700/Glyma.14G154200/Glyma.06G043900/Glyma.03G161300/Glyma.06G116100/Glyma.04G133700/Glyma.15G056100/Glyma.04G246600/Glyma.13G031500/Glyma.15G276000/Glyma.16G041400/Glyma.19G110900/Glyma.10G268100/Glyma.07G105000/Glyma.17G078700/Glyma.08G310900/Glyma.18G067800/Glyma.03G219200/Glyma.01G046400/Glyma.17G104000/Glyma.05G129700/Glyma.19G165900…	123
0 h	03008	Ribosome biogenesis in eukaryotes	90/4171	147/14423	2.98317e-16	1.66063e-14	1.32934e-14	Glyma.15G056100/Glyma.18G020000/Glyma.16G041400/Glyma.19G110900/Glyma.10G022600/Glyma.04G200700/Glyma.11G152600/Glyma.19G165900/Glyma.17G128400/Glyma.07G032500/Glyma.08G176900/Glyma.11G237200/Glyma.11G114300/Glyma.05G046400/Glyma.20G215000/Glyma.12G040200/Glyma.08G013300/Glyma.19G186600/Glyma.07G261900/Glyma.02G151500/Glyma.17G115400/Glyma.04G139900/Glyma.17G029800/Glyma.14G196700/Glyma.17G233900…	90		The top 50 enriched KEGG pathways showed here.
0 h	03040	Spliceosome	150/4171	310/14423	2.14796e-13	8.96775e-12	7.17872e-12	Glyma.02G205600/Glyma.12G239000/Glyma.17G072400/Glyma.04G208600/Glyma.17G115400/Glyma.14G196700/Glyma.17G063100/Glyma.20G084000/Glyma.07G252700/Glyma.14G025900/Glyma.18G266500/Glyma.03G143400/Glyma.07G205500/Glyma.15G097500/Glyma.19G196100/Glyma.14G200400/Glyma.19G082500/Glyma.03G198200/Glyma.07G170800/Glyma.05G149300/Glyma.19G172200/Glyma.17G105700/Glyma.20G113200/Glyma.05G127900/Glyma.20G075100…	150
0 h	03051	03051	90/4171	164/14423	2.51145e-12	8.38825e-11	6.71483e-11	Glyma.02G205600/Glyma.17G072400/Glyma.06G236100/Glyma.01G055500/Glyma.08G013300/Glyma.18G297400/Glyma.14G011600/Glyma.05G079000/Glyma.18G074100/Glyma.07G155700/Glyma.17G127100/Glyma.02G302500/Glyma.03G170600/Glyma.05G206400/Glyma.14G071000/Glyma.10G295600/Glyma.08G223800/Glyma.13G031200/Glyma.07G170800/Glyma.04G078200/Glyma.19G172200/Glyma.18G029800/Glyma.09G161300/Glyma.18G050900/Glyma.11G199900…	90
0 h	03050	Proteasome	64/4171	105/14423	7.72761e-12	2.15085e-10	1.72177e-10	Glyma.05G079000/Glyma.07G155700/Glyma.17G127100/Glyma.03G170600/Glyma.14G071000/Glyma.10G295600/Glyma.13G031200/Glyma.04G078200/Glyma.18G029800/Glyma.09G161300/Glyma.18G050900/Glyma.11G199900/Glyma.10G279900/Glyma.10G043000/Glyma.04G249300/Glyma.01G165100/Glyma.08G286200/Glyma.17G252100/Glyma.04G077400/Glyma.14G073000/Glyma.16G126300/Glyma.12G147200/Glyma.06G021600/Glyma.08G048800/Glyma.18G138900…	64
0 h	03013	RNA transport	127/4171	271/14423	2.19017e-10	5.22511e-09	4.18272e-09	Glyma.13G148200/Glyma.19G188700/Glyma.10G063700/Glyma.01G224700/Glyma.05G114900/Glyma.20G171200/Glyma.04G074200/Glyma.06G041700/Glyma.15G010000/Glyma.17G053200/Glyma.04G040700/Glyma.19G052400/Glyma.03G002400/Glyma.19G240700/Glyma.02G206900/Glyma.02G266200/Glyma.14G051300/Glyma.15G075100/Glyma.16G071100/Glyma.08G172000/Glyma.18G024800/Glyma.11G162365/Glyma.13G232100/Glyma.15G097500/Glyma.09G234100…	127
0 h	09124	Replication and repair	115/4171	241/14423	4.0086e-10	8.36796e-09	6.69858e-09	Glyma.11G184100/Glyma.12G088300/Glyma.11G070700/Glyma.03G161300/Glyma.02G261800/Glyma.17G078700/Glyma.15G092000/Glyma.18G067800/Glyma.03G219200/Glyma.17G104000/Glyma.05G129700/Glyma.02G286600/Glyma.13G010700/Glyma.19G216100/Glyma.07G087700/Glyma.07G238400/Glyma.05G020600/Glyma.10G014100/Glyma.09G047300/Glyma.14G133400/Glyma.13G220400/Glyma.11G113300/Glyma.17G035000/Glyma.09G189100/Glyma.17G202200…	115
0 h	03030	DNA replication	51/4171	87/14423	6.892e-09	1.27885e-07	1.02372e-07	Glyma.11G070700/Glyma.17G078700/Glyma.18G067800/Glyma.03G219200/Glyma.17G104000/Glyma.05G129700/Glyma.02G286600/Glyma.19G216100/Glyma.07G238400/Glyma.05G020600/Glyma.09G047300/Glyma.14G133400/Glyma.11G113300/Glyma.17G035000/Glyma.17G202200/Glyma.08G334900/Glyma.04G248900/Glyma.12G039200/Glyma.08G079500/Glyma.15G154900/Glyma.13G156400/Glyma.10G278800/Glyma.08G084400/Glyma.06G310500/Glyma.08G313400…	51
0 h	09121	Transcription	189/4171	465/14423	2.50951e-08	4.19089e-07	3.35482e-07	Glyma.02G205600/Glyma.12G239000/Glyma.17G072400/Glyma.17G050400/Glyma.03G129500/Glyma.04G208600/Glyma.18G281100/Glyma.17G115400/Glyma.14G196700/Glyma.09G016100/Glyma.17G063100/Glyma.20G084000/Glyma.07G252700/Glyma.14G025900/Glyma.18G212300/Glyma.18G266500/Glyma.03G143400/Glyma.07G205500/Glyma.15G097500/Glyma.19G196100/Glyma.01G029400/Glyma.18G179600/Glyma.14G200400/Glyma.19G082500/Glyma.07G220900…	189
0 h	03012	Translation factors	111/4171	247/14423	5.17056e-08	7.84985e-07	6.28384e-07	Glyma.09G275000/Glyma.16G001900/Glyma.05G114900/Glyma.20G215000/Glyma.12G165301/Glyma.02G276600/Glyma.04G080800/Glyma.13G073200/Glyma.08G167900/Glyma.17G053200/Glyma.06G082500/Glyma.06G170900/Glyma.01G054000/Glyma.19G052400/Glyma.03G002400/Glyma.08G170000/Glyma.04G195100/Glyma.03G150600/Glyma.14G039100/Glyma.15G257100/Glyma.15G075100/Glyma.18G024800/Glyma.09G046000/Glyma.09G234100/Glyma.03G106500…	111
0 h	09104	Nucleotide metabolism	100/4171	239/14423	1.15364e-05	0.000160549	0.00012852	Glyma.05G146000/Glyma.10G121524/Glyma.14G021000/Glyma.15G217500/Glyma.02G293500/Glyma.19G182400/Glyma.03G089400/Glyma.11G047900/Glyma.16G173100/Glyma.08G232600/Glyma.02G182400/Glyma.03G189700/Glyma.05G000700/Glyma.14G115700/Glyma.04G065800/Glyma.15G106200/Glyma.15G073000/Glyma.09G126300/Glyma.19G000700/Glyma.03G109500/Glyma.17G212100/Glyma.10G178900/Glyma.18G048400/Glyma.13G328600/Glyma.07G258900…	100
0 h	00230	Purine metabolism	74/4171	168/14423	1.9521e-05	0.000250769	0.000200742	Glyma.05G146000/Glyma.10G121524/Glyma.19G182400/Glyma.11G047900/Glyma.16G173100/Glyma.02G182400/Glyma.03G189700/Glyma.05G000700/Glyma.14G115700/Glyma.04G065800/Glyma.15G106200/Glyma.15G073000/Glyma.09G126300/Glyma.19G000700/Glyma.03G109500/Glyma.17G212100/Glyma.10G178900/Glyma.07G258900/Glyma.10G100800/Glyma.10G156900/Glyma.05G186900/Glyma.07G115900/Glyma.06G067200/Glyma.18G036300/Glyma.05G045200…	74
0 h	03430	Mismatch repair	35/4171	65/14423	2.12424e-05	0.000253392	0.000202841	Glyma.11G070700/Glyma.17G078700/Glyma.18G067800/Glyma.07G087700/Glyma.05G020600/Glyma.14G133400/Glyma.09G189100/Glyma.17G202200/Glyma.08G120900/Glyma.08G334900/Glyma.04G248900/Glyma.01G158400/Glyma.08G079500/Glyma.10G278800/Glyma.17G121400/Glyma.05G163700/Glyma.09G213500/Glyma.20G111700/Glyma.12G206200/Glyma.05G124300/Glyma.06G155300/Glyma.17G130800/Glyma.04G210700/Glyma.12G096100/Glyma.01G030600…	35
0 h	03018	RNA degradation	79/4171	188/14423	7.70685e-05	0.000858029	0.000686856	Glyma.13G148200/Glyma.12G239000/Glyma.09G261400/Glyma.02G293100/Glyma.07G269500/Glyma.19G188700/Glyma.08G199800/Glyma.10G063700/Glyma.08G192700/Glyma.06G208200/Glyma.17G052100/Glyma.02G112000/Glyma.20G171200/Glyma.06G041700/Glyma.06G088600/Glyma.04G040700/Glyma.10G193200/Glyma.04G086900/Glyma.18G092700/Glyma.07G009600/Glyma.10G127800/Glyma.09G261100/Glyma.12G076900/Glyma.08G065100/Glyma.20G197100…	79
0 h	04812	Cytoskeleton proteins	121/4171	311/14423	8.27355e-05	0.000863552	0.000691277	Glyma.19G235300/Glyma.05G149700/Glyma.18G180900/Glyma.15G150100/Glyma.20G234100/Glyma.03G237700/Glyma.20G159200/Glyma.11G052200/Glyma.12G191000/Glyma.01G190000/Glyma.10G154200/Glyma.09G136400/Glyma.08G106400/Glyma.20G207200/Glyma.15G063200/Glyma.13G310700/Glyma.10G182800/Glyma.02G135700/Glyma.15G252800/Glyma.13G133200/Glyma.19G137500/Glyma.09G282500/Glyma.17G123400/Glyma.10G045500/Glyma.10G178100…	121
0 h	00220	Arginine biosynthesis	30/4171	56/14423	9.20814e-05	0.000904564	0.000724108	Glyma.05G146000/Glyma.01G204600/Glyma.19G111000/Glyma.05G046900/Glyma.01G131100/Glyma.07G104500/Glyma.14G213300/Glyma.16G153400/Glyma.11G047200/Glyma.10G044300/Glyma.01G194700/Glyma.07G179700/Glyma.04G073800/Glyma.17G128600/Glyma.20G009400/Glyma.04G030500/Glyma.06G082400/Glyma.05G046700/Glyma.11G043300/Glyma.04G094600/Glyma.06G096700/Glyma.05G066200/Glyma.06G030600/Glyma.05G236000/Glyma.20G000500…	30
0 h	03420	Nucleotide excision repair	50/4171	110/14423	0.000161856	0.00150166	0.00120209	Glyma.11G070700/Glyma.17G078700/Glyma.18G067800/Glyma.05G020600/Glyma.14G133400/Glyma.17G202200/Glyma.08G334900/Glyma.04G248900/Glyma.08G079500/Glyma.10G278800/Glyma.18G297400/Glyma.U032008/Glyma.08G313400/Glyma.09G213500/Glyma.20G111700/Glyma.08G223800/Glyma.12G206200/Glyma.05G124300/Glyma.05G140800/Glyma.06G155300/Glyma.17G130800/Glyma.04G210700/Glyma.08G047000/Glyma.12G096100/Glyma.01G030600/G…	50
0 h	00061	Fatty acid biosynthesis	40/4171	85/14423	0.000291724	0.0025641	0.00205258	Glyma.14G121400/Glyma.13G038600/Glyma.06G112900/Glyma.19G028800/Glyma.18G265300/Glyma.13G057400/Glyma.08G345900/Glyma.18G057700/Glyma.11G101400/Glyma.12G027300/Glyma.15G052500/Glyma.05G129600/Glyma.07G207200/Glyma.11G164500/Glyma.05G221100/Glyma.18G156100/Glyma.08G084300/Glyma.08G024700/Glyma.18G009200/Glyma.08G349200/Glyma.02G138100/Glyma.08G027600/Glyma.08G179900/Glyma.09G277400/Glyma.18G243500…	40
0 h	00620	Pyruvate metabolism	70/4171	169/14423	0.000318654	0.00266076	0.00212995	Glyma.16G173100/Glyma.06G229900/Glyma.19G028800/Glyma.03G189700/Glyma.01G091000/Glyma.05G000700/Glyma.01G019200/Glyma.18G265300/Glyma.13G057400/Glyma.05G227400/Glyma.07G241600/Glyma.09G004300/Glyma.01G146300/Glyma.09G126300/Glyma.19G000700/Glyma.15G143100/Glyma.10G178900/Glyma.16G018300/Glyma.18G137300/Glyma.05G058100/Glyma.05G221100/Glyma.10G215400/Glyma.17G128100/Glyma.17G100600/Glyma.20G114500…	70
0 h	00250	Alanine, aspartate and glutamate metabolism	43/4171	94/14423	0.000381253	0.00303187	0.00242702	Glyma.04G042100/Glyma.06G043000/Glyma.01G204600/Glyma.14G021000/Glyma.19G111000/Glyma.05G046900/Glyma.02G293500/Glyma.18G210500/Glyma.01G131100/Glyma.05G182600/Glyma.17G238200/Glyma.07G104500/Glyma.14G213300/Glyma.16G153400/Glyma.02G241400/Glyma.11G240200/Glyma.13G328600/Glyma.15G263500/Glyma.18G017200/Glyma.17G128600/Glyma.08G163700/Glyma.04G216000/Glyma.14G162300/Glyma.06G082400/Glyma.05G046700…	43
0 h	03400	DNA repair and recombination proteins	162/4171	448/14423	0.000452606	0.00343569	0.00275029	Glyma.11G184100/Glyma.12G088300/Glyma.11G070700/Glyma.03G161300/Glyma.03G129500/Glyma.02G261800/Glyma.17G078700/Glyma.12G104000/Glyma.15G092000/Glyma.18G067800/Glyma.18G048400/Glyma.08G010700/Glyma.09G264000/Glyma.13G010700/Glyma.07G087700/Glyma.05G020600/Glyma.10G014100/Glyma.14G133400/Glyma.05G186900/Glyma.13G220400/Glyma.03G124900/Glyma.09G189100/Glyma.17G202200/Glyma.15G060100/Glyma.08G120900…	162
0 h	03060	Protein export	41/4171	90/14423	0.00057263	0.00398455	0.00318965	Glyma.06G227200/Glyma.08G284800/Glyma.12G070500/Glyma.08G025700/Glyma.05G219400/Glyma.01G133400/Glyma.03G239600/Glyma.08G025900/Glyma.03G034100/Glyma.12G156800/Glyma.12G171400/Glyma.10G156000/Glyma.08G101100/Glyma.14G053200/Glyma.05G146700/Glyma.08G336000/Glyma.13G268600/Glyma.02G258900/Glyma.08G103600/Glyma.05G144700/Glyma.12G230900/Glyma.13G327801/Glyma.11G249600/Glyma.08G008000/Glyma.05G200600…	41
0 h	03440	Homologous recombination	41/4171	90/14423	0.00057263	0.00398455	0.00318965	Glyma.02G261800/Glyma.17G078700/Glyma.15G092000/Glyma.13G010700/Glyma.05G020600/Glyma.10G014100/Glyma.14G133400/Glyma.13G220400/Glyma.17G202200/Glyma.08G079500/Glyma.10G278800/Glyma.08G313400/Glyma.09G213500/Glyma.U027200/Glyma.17G045000/Glyma.20G111700/Glyma.13G115000/Glyma.12G206200/Glyma.05G124300/Glyma.06G155300/Glyma.04G210700/Glyma.08G188100/Glyma.01G030600/Glyma.13G363400/Glyma.05G014200/G…	41
0 h	00010	Glycolysis / Gluconeogenesis	94/4171	243/14423	0.000609575	0.00407196	0.00325962	Glyma.13G035200/Glyma.01G116700/Glyma.10G041000/Glyma.16G173100/Glyma.14G121200/Glyma.07G269500/Glyma.08G199800/Glyma.03G189700/Glyma.06G105600/Glyma.05G000700/Glyma.01G019200/Glyma.18G200300/Glyma.01G118000/Glyma.07G241600/Glyma.06G208200/Glyma.09G126300/Glyma.19G000700/Glyma.06G122600/Glyma.15G143100/Glyma.10G178900/Glyma.16G018300/Glyma.18G137300/Glyma.05G058100/Glyma.13G231700/Glyma.10G215400…	94
0 h	00300	Lysine biosynthesis	13/4171	20/14423	0.00086569	0.00556039	0.00445112	Glyma.16G028900/Glyma.09G268200/Glyma.08G063500/Glyma.07G060300/Glyma.05G240700/Glyma.18G221700/Glyma.05G151100/Glyma.03G181200/Glyma.08G047800/Glyma.07G185700/Glyma.19G174300/Glyma.08G107800/Glyma.03G173400	13
0 h	00333	Prodigiosin biosynthesis	8/4171	10/14423	0.00121219	0.0072553	0.0058079	Glyma.08G345900/Glyma.18G057700/Glyma.11G101400/Glyma.12G027300/Glyma.11G164500/Glyma.18G156100/Glyma.18G009200/Glyma.11G248000	8
0 h	04141	Protein processing in endoplasmic reticulum	137/4171	379/14423	0.00121646	0.0072553	0.0058079	Glyma.02G252800/Glyma.14G063700/Glyma.04G186000/Glyma.02G205600/Glyma.18G094600/Glyma.06G180000/Glyma.17G072400/Glyma.03G232000/Glyma.04G247900/Glyma.13G077300/Glyma.06G114800/Glyma.20G065900/Glyma.06G227200/Glyma.16G050800/Glyma.14G063800/Glyma.12G024500/Glyma.11G146800/Glyma.12G151200/Glyma.12G070500/Glyma.02G266900/Glyma.11G098300/Glyma.04G202900/Glyma.13G176000/Glyma.06G054700/Glyma.19G099900…	137
0 h	00970	Aminoacyl-tRNA biosynthesis	36/4171	80/14423	0.00158144	0.00910694	0.00729014	Glyma.20G090100/Glyma.10G141500/Glyma.10G155000/Glyma.11G034100/Glyma.20G233300/Glyma.13G152678/Glyma.03G224500/Glyma.12G043200/Glyma.12G020700/Glyma.01G032500/Glyma.11G117800/Glyma.08G363700/Glyma.01G208100/Glyma.10G239500/Glyma.10G289600/Glyma.19G221400/Glyma.13G000200/Glyma.05G234900/Glyma.10G272800/Glyma.01G176800/Glyma.08G031100/Glyma.05G016400/Glyma.12G018400/Glyma.03G108900/Glyma.11G102100…	36
0 h	00020	Citrate cycle (TCA cycle)	39/4171	94/14423	0.00599926	0.0333959	0.0267336	Glyma.01G019200/Glyma.07G241600/Glyma.19G226100/Glyma.15G143100/Glyma.16G018300/Glyma.08G159900/Glyma.10G215400/Glyma.17G100600/Glyma.20G114500/Glyma.09G203500/Glyma.05G141000/Glyma.05G026300/Glyma.17G032300/Glyma.14G001900/Glyma.07G049600/Glyma.02G042100/Glyma.02G005500/Glyma.14G092100/Glyma.17G231400/Glyma.03G228900/Glyma.07G035000/Glyma.03G261000/Glyma.02G094300/Glyma.20G176300/Glyma.12G159300…	39
0 h	00660	C5-Branched dibasic acid metabolism	9/4171	14/14423	0.00633248	0.0341137	0.0273081	Glyma.05G167700/Glyma.11G079000/Glyma.14G217300/Glyma.13G367900/Glyma.08G126100/Glyma.08G210500/Glyma.15G005400/Glyma.13G241000/Glyma.15G072500	9
0 h	00780	Biotin metabolism	14/4171	26/14423	0.00659215	0.0344028	0.0275396	Glyma.08G345900/Glyma.11G101400/Glyma.12G027300/Glyma.15G052500/Glyma.05G129600/Glyma.18G156100/Glyma.08G084300/Glyma.08G024700/Glyma.18G009200/Glyma.08G179900/Glyma.11G248000/Glyma.13G128000/Glyma.12G020600/Glyma.17G047000	14
0 h	00290	Valine, leucine and isoleucine biosynthesis	18/4171	37/14423	0.00868587	0.0439558	0.0351868	Glyma.07G186000/Glyma.07G186100/Glyma.05G167700/Glyma.13G291300/Glyma.20G245300/Glyma.11G045300/Glyma.11G079000/Glyma.14G217300/Glyma.13G367900/Glyma.08G126100/Glyma.08G210500/Glyma.13G207900/Glyma.15G005400/Glyma.12G122900/Glyma.13G241000/Glyma.10G295400/Glyma.12G210000/Glyma.15G072500	18
4 h	03009	Ribosome biogenesis	241/4185	469/14423	4.04103e-25	6.70811e-23	5.44476e-23	Glyma.14G013102/Glyma.17G072400/Glyma.16G099100/Glyma.09G104000/Glyma.07G043700/Glyma.16G071100/Glyma.11G101500/Glyma.02G168900/Glyma.15G254100/Glyma.14G024600/Glyma.12G027400/Glyma.08G316100/Glyma.20G004000/Glyma.02G290200/Glyma.11G114300/Glyma.14G119200/Glyma.15G056100/Glyma.10G005700/Glyma.16G012100/Glyma.10G241900/Glyma.16G221700/Glyma.08G359600/Glyma.03G263200/Glyma.13G362700/Glyma.08G313100…	241
4 h	04812	Cytoskeleton proteins	148/4185	311/14423	2.14985e-12	1.56422e-10	1.26963e-10	Glyma.19G235300/Glyma.09G136400/Glyma.03G237700/Glyma.02G135700/Glyma.08G106400/Glyma.15G252800/Glyma.11G253200/Glyma.02G296800/Glyma.14G011100/Glyma.05G149700/Glyma.01G021200/Glyma.08G062500/Glyma.18G082000/Glyma.13G310700/Glyma.04G036340/Glyma.20G202300/Glyma.10G182800/Glyma.13G133200/Glyma.12G191000/Glyma.10G045500/Glyma.19G195300/Glyma.02G302800/Glyma.08G174300/Glyma.16G181900/Glyma.19G137500…	148
4 h	03008	Ribosome biogenesis in eukaryotes	83/4185	147/14423	2.8269e-12	1.56422e-10	1.26963e-10	Glyma.16G071100/Glyma.14G024600/Glyma.02G290200/Glyma.11G114300/Glyma.14G119200/Glyma.15G056100/Glyma.08G359600/Glyma.13G362700/Glyma.08G176900/Glyma.11G125100/Glyma.05G046400/Glyma.09G084600/Glyma.05G185000/Glyma.11G092200/Glyma.01G228900/Glyma.03G214900/Glyma.13G201700/Glyma.13G037300/Glyma.07G035600/Glyma.11G133600/Glyma.19G110900/Glyma.10G022600/Glyma.19G186600/Glyma.04G200700/Glyma.06G164800…	83
4 h	03013	RNA transport	130/4185	271/14423	2.37234e-11	9.84522e-10	7.99105e-10	Glyma.02G077400/Glyma.16G160800/Glyma.13G148200/Glyma.19G188700/Glyma.16G071100/Glyma.01G224700/Glyma.10G063700/Glyma.05G003500/Glyma.20G171200/Glyma.03G106500/Glyma.19G263400/Glyma.07G117800/Glyma.19G240700/Glyma.06G222100/Glyma.05G114900/Glyma.19G101600/Glyma.14G170300/Glyma.15G010000/Glyma.04G074200/Glyma.04G040700/Glyma.11G092200/Glyma.01G228900/Glyma.12G024600/Glyma.19G052400/Glyma.12G235000…	130
4 h	03032	DNA replication proteins	110/4185	221/14423	4.93608e-11	1.63878e-09	1.33014e-09	Glyma.04G071600/Glyma.12G088300/Glyma.15G276000/Glyma.03G161300/Glyma.14G154200/Glyma.09G258700/Glyma.04G246600/Glyma.08G310900/Glyma.11G070700/Glyma.06G116100/Glyma.08G313400/Glyma.13G031500/Glyma.19G216100/Glyma.10G035700/Glyma.04G187600/Glyma.10G014100/Glyma.13G156400/Glyma.05G129700/Glyma.15G056100/Glyma.07G100600/Glyma.17G035000/Glyma.03G219200/Glyma.06G310500/Glyma.04G182900/Glyma.13G122100…	110
4 h	03015	mRNA surveillance pathway	106/4185	213/14423	1.11972e-10	3.0979e-09	2.51446e-09	Glyma.02G077400/Glyma.16G160800/Glyma.13G148200/Glyma.19G188700/Glyma.10G063700/Glyma.04G071700/Glyma.20G171200/Glyma.03G057600/Glyma.02G306700/Glyma.06G073000/Glyma.09G035800/Glyma.19G101600/Glyma.04G047800/Glyma.09G153100/Glyma.14G170300/Glyma.11G123500/Glyma.04G040700/Glyma.15G140800/Glyma.08G329500/Glyma.20G208500/Glyma.16G203900/Glyma.01G121400/Glyma.07G231800/Glyma.11G237500/Glyma.17G240400…	106
4 h	03018	RNA degradation	94/4185	188/14423	9.14046e-10	2.1676e-08	1.75937e-08	Glyma.02G077400/Glyma.09G261400/Glyma.01G024800/Glyma.16G160800/Glyma.02G293100/Glyma.13G148200/Glyma.12G239000/Glyma.19G188700/Glyma.07G269500/Glyma.10G063700/Glyma.16G036100/Glyma.20G171200/Glyma.06G208200/Glyma.09G115600/Glyma.20G122600/Glyma.09G016800/Glyma.15G122400/Glyma.03G118400/Glyma.04G040700/Glyma.06G143500/Glyma.08G192700/Glyma.19G115100/Glyma.08G171800/Glyma.07G009600/Glyma.17G240400…	94
4 h	09124	Replication and repair	114/4185	241/14423	1.1391e-09	2.36364e-08	1.91849e-08	Glyma.12G088300/Glyma.U032008/Glyma.03G161300/Glyma.02G261800/Glyma.01G158400/Glyma.11G070700/Glyma.08G313400/Glyma.19G216100/Glyma.15G092000/Glyma.10G014100/Glyma.13G156400/Glyma.05G129700/Glyma.07G100600/Glyma.17G035000/Glyma.13G220400/Glyma.03G219200/Glyma.06G310500/Glyma.13G366800/Glyma.04G182900/Glyma.13G010700/Glyma.12G039200/Glyma.07G087700/Glyma.08G120900/Glyma.17G121400/Glyma.07G238400/G…	114
4 h	03040	Spliceosome	130/4185	310/14423	6.34247e-07	1.16983e-05	9.49516e-06	Glyma.17G072400/Glyma.12G239000/Glyma.15G253800/Glyma.11G012200/Glyma.15G216300/Glyma.13G245700/Glyma.19G101600/Glyma.14G089078/Glyma.20G135800/Glyma.03G206600/Glyma.02G034300/Glyma.10G255700/Glyma.14G217400/Glyma.09G031100/Glyma.15G007100/Glyma.08G265300/Glyma.08G173500/Glyma.10G291300/Glyma.10G005000/Glyma.13G366100/Glyma.02G139900/Glyma.08G229600/Glyma.11G237500/Glyma.07G134400/Glyma.10G073300…	130
4 h	03021	Transcription machinery	157/4185	402/14423	7.49597e-06	0.000124433	0.000100998	Glyma.04G238200/Glyma.13G225100/Glyma.01G215700/Glyma.06G312200/Glyma.08G021700/Glyma.06G170800/Glyma.06G061600/Glyma.04G195200/Glyma.15G235900/Glyma.13G196900/Glyma.03G121000/Glyma.03G057600/Glyma.18G234700/Glyma.01G166400/Glyma.03G129500/Glyma.13G324500/Glyma.15G087100/Glyma.05G215500/Glyma.11G256800/Glyma.05G013400/Glyma.11G077000/Glyma.19G263900/Glyma.09G066000/Glyma.18G000100/Glyma.09G153100…	157
4 h	03012	Translation factors	103/4185	247/14423	1.195e-05	0.000180337	0.000146374	Glyma.03G106500/Glyma.07G117800/Glyma.11G163201/Glyma.08G152400/Glyma.05G114900/Glyma.15G095800/Glyma.15G271800/Glyma.19G052400/Glyma.09G275000/Glyma.05G245100/Glyma.08G340500/Glyma.09G077900/Glyma.01G094200/Glyma.08G170000/Glyma.07G028800/Glyma.18G280600/Glyma.19G173100/Glyma.07G249900/Glyma.02G276600/Glyma.03G150600/Glyma.03G002400/Glyma.05G041900/Glyma.12G241600/Glyma.09G193300/Glyma.07G107700…	103
4 h	03016	Transfer RNA biogenesis	120/4185	299/14423	2.07246e-05	0.00028465	0.000231041	Glyma.02G107900/Glyma.13G000200/Glyma.16G071100/Glyma.09G174800/Glyma.16G036100/Glyma.19G263400/Glyma.19G240700/Glyma.09G175800/Glyma.10G272800/Glyma.05G114900/Glyma.12G020700/Glyma.11G034100/Glyma.08G090700/Glyma.11G092200/Glyma.01G228900/Glyma.10G239500/Glyma.05G121000/Glyma.11G102100/Glyma.10G141500/Glyma.19G052400/Glyma.01G208100/Glyma.13G282700/Glyma.14G075000/Glyma.19G033700/Glyma.08G075600…	120
4 h	03400	DNA repair and recombination proteins	170/4185	448/14423	2.22918e-05	0.00028465	0.000231041	Glyma.12G088300/Glyma.U032008/Glyma.03G161300/Glyma.02G261800/Glyma.01G158400/Glyma.11G070700/Glyma.20G087900/Glyma.08G313400/Glyma.03G237200/Glyma.15G092000/Glyma.10G014100/Glyma.10G029000/Glyma.09G264000/Glyma.03G129500/Glyma.15G060100/Glyma.07G100600/Glyma.10G284200/Glyma.13G220400/Glyma.01G243900/Glyma.13G366800/Glyma.14G140800/Glyma.04G182900/Glyma.13G010700/Glyma.08G238200/Glyma.09G066000/G…	170
4 h	03030	DNA replication	43/4185	87/14423	4.56694e-05	0.000541508	0.000439525	Glyma.11G070700/Glyma.08G313400/Glyma.19G216100/Glyma.13G156400/Glyma.05G129700/Glyma.17G035000/Glyma.03G219200/Glyma.06G310500/Glyma.12G039200/Glyma.07G238400/Glyma.04G248900/Glyma.17G104000/Glyma.12G096100/Glyma.11G113300/Glyma.09G047300/Glyma.06G308700/Glyma.08G084400/Glyma.12G087000/Glyma.14G025300/Glyma.15G154900/Glyma.18G067800/Glyma.18G292900/Glyma.01G187400/Glyma.05G020600/Glyma.12G080900…	43
4 h	00970	Aminoacyl-tRNA biosynthesis	39/4185	80/14423	0.00014768	0.00163433	0.00132653	Glyma.13G000200/Glyma.10G272800/Glyma.12G020700/Glyma.11G034100/Glyma.10G239500/Glyma.11G102100/Glyma.10G141500/Glyma.01G208100/Glyma.20G090100/Glyma.10G289600/Glyma.07G124000/Glyma.01G032500/Glyma.13G152678/Glyma.19G221400/Glyma.12G043200/Glyma.11G094300/Glyma.01G006400/Glyma.03G224500/Glyma.05G224000/Glyma.08G363700/Glyma.07G125400/Glyma.08G031100/Glyma.01G006100/Glyma.20G233300/Glyma.12G018400…	39
4 h	02048	Prokaryotic defense system	14/4185	20/14423	0.000174579	0.00173404	0.00140747	Glyma.04G187600/Glyma.11G083600/Glyma.10G141500/Glyma.20G090100/Glyma.07G124000/Glyma.10G071800/Glyma.06G178200/Glyma.01G007800/Glyma.19G194800/Glyma.03G097900/Glyma.16G103500/Glyma.01G160300/Glyma.08G322800/Glyma.18G089400	14
4 h	03430	Mismatch repair	33/4185	65/14423	0.000177583	0.00173404	0.00140747	Glyma.01G158400/Glyma.11G070700/Glyma.07G100600/Glyma.07G087700/Glyma.08G120900/Glyma.17G121400/Glyma.04G248900/Glyma.12G096100/Glyma.06G308700/Glyma.09G189100/Glyma.18G067800/Glyma.18G292900/Glyma.05G020600/Glyma.10G019200/Glyma.12G080900/Glyma.19G216000/Glyma.05G163700/Glyma.04G210700/Glyma.17G078700/Glyma.09G213500/Glyma.19G147500/Glyma.06G155300/Glyma.17G202200/Glyma.17G130800/Glyma.08G334900…	33
4 h	00220	Arginine biosynthesis	28/4185	56/14423	0.000736797	0.00676024	0.00548707	Glyma.01G204600/Glyma.05G146000/Glyma.05G046900/Glyma.19G111000/Glyma.14G213300/Glyma.10G044300/Glyma.07G179700/Glyma.11G047200/Glyma.01G131100/Glyma.04G073800/Glyma.01G194700/Glyma.17G128600/Glyma.20G009400/Glyma.06G096700/Glyma.17G216000/Glyma.04G094600/Glyma.07G118300/Glyma.04G030500/Glyma.05G066200/Glyma.11G043300/Glyma.06G275700/Glyma.20G000500/Glyma.05G236000/Glyma.06G030600/Glyma.13G131900…	28
4 h	04091	Lectins	14/4185	22/14423	0.000773762	0.00676024	0.00548707	Glyma.04G202900/Glyma.05G199200/Glyma.08G006500/Glyma.20G098400/Glyma.06G162600/Glyma.10G147600/Glyma.19G255000/Glyma.16G026200/Glyma.10G179900/Glyma.11G126100/Glyma.03G256800/Glyma.07G224600/Glyma.20G024500/Glyma.07G057200	14
4 h	00250	Alanine, aspartate and glutamate metabolism	42/4185	94/14423	0.000868652	0.00678267	0.00550527	Glyma.01G204600/Glyma.04G042100/Glyma.06G043000/Glyma.02G293500/Glyma.14G021000/Glyma.05G046900/Glyma.19G111000/Glyma.18G210500/Glyma.11G240200/Glyma.14G213300/Glyma.14G162300/Glyma.17G238200/Glyma.19G065600/Glyma.05G182600/Glyma.13G328600/Glyma.02G241400/Glyma.01G131100/Glyma.18G017200/Glyma.06G127400/Glyma.17G128600/Glyma.15G045100/Glyma.08G163700/Glyma.03G139200/Glyma.15G263500/Glyma.06G096700…	42
4 h	00300	Lysine biosynthesis	13/4185	20/14423	0.000896648	0.00678267	0.00550527	Glyma.16G028900/Glyma.05G151100/Glyma.07G060300/Glyma.05G240700/Glyma.08G063500/Glyma.09G268200/Glyma.08G107800/Glyma.03G181200/Glyma.18G221700/Glyma.07G185700/Glyma.02G066100/Glyma.08G047800/Glyma.19G174300	13
4 h	09121	Transcription	166/4185	465/14423	0.000898908	0.00678267	0.00550527	Glyma.17G072400/Glyma.12G239000/Glyma.03G129500/Glyma.15G253800/Glyma.11G012200/Glyma.15G216300/Glyma.05G013400/Glyma.09G066000/Glyma.13G245700/Glyma.19G101600/Glyma.14G089078/Glyma.09G215000/Glyma.20G135800/Glyma.17G121600/Glyma.03G206600/Glyma.02G034300/Glyma.10G255700/Glyma.14G217400/Glyma.09G031100/Glyma.15G007100/Glyma.08G265300/Glyma.08G173500/Glyma.10G291300/Glyma.17G183400/Glyma.10G005000…	166
4 h	00333	Prodigiosin biosynthesis	8/4185	10/14423	0.00124228	0.00896605	0.00727745	Glyma.18G057700/Glyma.11G164500/Glyma.11G101400/Glyma.08G345900/Glyma.12G027300/Glyma.18G156100/Glyma.18G009200/Glyma.11G248000	8
4 h	00061	Fatty acid biosynthesis	38/4185	85/14423	0.00147723	0.0102175	0.0082932	Glyma.14G121400/Glyma.13G038600/Glyma.06G112900/Glyma.13G057400/Glyma.18G265300/Glyma.19G028800/Glyma.18G057700/Glyma.05G221100/Glyma.07G207200/Glyma.11G164500/Glyma.13G079900/Glyma.08G349200/Glyma.05G129600/Glyma.11G101400/Glyma.04G104900/Glyma.02G138100/Glyma.18G195900/Glyma.12G047400/Glyma.06G105900/Glyma.08G345900/Glyma.08G084300/Glyma.12G027300/Glyma.18G243500/Glyma.18G195700/Glyma.08G024700…	38
4 h	02010	ABC transporters	24/4185	48/14423	0.00172549	0.0110166	0.00894182	Glyma.12G135300/Glyma.17G041400/Glyma.13G118800/Glyma.13G222000/Glyma.13G118900/Glyma.13G118500/Glyma.16G172400/Glyma.16G172600/Glyma.18G154200/Glyma.09G206300/Glyma.01G016500/Glyma.02G238300/Glyma.18G286600/Glyma.10G227400/Glyma.10G055000/Glyma.14G207200/Glyma.02G094800/Glyma.20G165000/Glyma.20G239800/Glyma.13G063700/Glyma.13G370300/Glyma.10G290800/Glyma.13G142100/Glyma.03G136000	24
4 h	09131	Membrane transport	24/4185	48/14423	0.00172549	0.0110166	0.00894182	Glyma.12G135300/Glyma.17G041400/Glyma.13G118800/Glyma.13G222000/Glyma.13G118900/Glyma.13G118500/Glyma.16G172400/Glyma.16G172600/Glyma.18G154200/Glyma.09G206300/Glyma.01G016500/Glyma.02G238300/Glyma.18G286600/Glyma.10G227400/Glyma.10G055000/Glyma.14G207200/Glyma.02G094800/Glyma.20G165000/Glyma.20G239800/Glyma.13G063700/Glyma.13G370300/Glyma.10G290800/Glyma.13G142100/Glyma.03G136000	24
4 h	03410	Base excision repair	29/4185	63/14423	0.00303651	0.0186689	0.015153	Glyma.12G088300/Glyma.03G161300/Glyma.08G313400/Glyma.13G366800/Glyma.12G087000/Glyma.14G025300/Glyma.15G013100/Glyma.18G067800/Glyma.18G292900/Glyma.07G059700/Glyma.17G073900/Glyma.12G080900/Glyma.04G210700/Glyma.19G147500/Glyma.06G155300/Glyma.02G289700/Glyma.10G141800/Glyma.19G162800/Glyma.08G334900/Glyma.U031407/Glyma.12G231200/Glyma.13G360800/Glyma.02G203900/Glyma.06G031700/Glyma.03G144600/G…	29
4 h	01007	Amino acid related enzymes	56/4185	141/14423	0.00398114	0.0236025	0.0191574	Glyma.07G186000/Glyma.07G186100/Glyma.18G210500/Glyma.13G000200/Glyma.05G182600/Glyma.01G131100/Glyma.10G272800/Glyma.12G020700/Glyma.11G034100/Glyma.10G239500/Glyma.11G102100/Glyma.10G141500/Glyma.01G208100/Glyma.11G045300/Glyma.20G090100/Glyma.10G289600/Glyma.07G124000/Glyma.17G216000/Glyma.01G032500/Glyma.16G203600/Glyma.08G063500/Glyma.13G152678/Glyma.19G221400/Glyma.12G043200/Glyma.11G094300…	56
4 h	03420	Nucleotide excision repair	45/4185	110/14423	0.00488708	0.0275588	0.0223686	Glyma.U032008/Glyma.11G070700/Glyma.08G313400/Glyma.04G248900/Glyma.12G096100/Glyma.06G308700/Glyma.12G087000/Glyma.06G046400/Glyma.14G025300/Glyma.18G067800/Glyma.18G292900/Glyma.05G020600/Glyma.12G080900/Glyma.04G210700/Glyma.13G371600/Glyma.17G078700/Glyma.08G223800/Glyma.09G213500/Glyma.19G147500/Glyma.06G155300/Glyma.U031908/Glyma.02G289700/Glyma.13G124600/Glyma.01G077200/Glyma.02G082200/Gly…	45
4 h	03440	Homologous recombination	38/4185	90/14423	0.00498051	0.0275588	0.0223686	Glyma.02G261800/Glyma.08G313400/Glyma.15G092000/Glyma.10G014100/Glyma.13G220400/Glyma.04G182900/Glyma.13G010700/Glyma.14G025300/Glyma.U027200/Glyma.03G165600/Glyma.12G170000/Glyma.05G020600/Glyma.08G339900/Glyma.11G150100/Glyma.04G210700/Glyma.11G253100/Glyma.17G078700/Glyma.13G363400/Glyma.11G104200/Glyma.09G213500/Glyma.19G147500/Glyma.08G188100/Glyma.06G155300/Glyma.12G029200/Glyma.09G103100/G…	38
8 h	03009	Ribosome biogenesis	263/4573	469/14423	1.51434e-28	2.52894e-26	1.96067e-26	Glyma.02G205600/Glyma.14G013102/Glyma.17G072400/Glyma.19G110900/Glyma.15G056100/Glyma.16G041400/Glyma.18G020000/Glyma.04G200700/Glyma.09G023100/Glyma.08G176900/Glyma.19G165900/Glyma.10G022600/Glyma.06G071900/Glyma.11G152600/Glyma.08G173300/Glyma.08G058500/Glyma.17G128400/Glyma.02G151500/Glyma.17G115400/Glyma.10G006200/Glyma.12G028500/Glyma.13G107200/Glyma.14G115100/Glyma.11G114300/Glyma.10G200300…	263
8 h	03051	03051	104/4573	164/14423	5.11652e-17	4.2723e-15	3.31228e-15	Glyma.02G205600/Glyma.17G072400/Glyma.16G057400/Glyma.06G236100/Glyma.01G055500/Glyma.04G249300/Glyma.10G295600/Glyma.05G079000/Glyma.18G297400/Glyma.14G011600/Glyma.17G127100/Glyma.13G031200/Glyma.08G286200/Glyma.04G078200/Glyma.03G170600/Glyma.07G155700/Glyma.14G071000/Glyma.09G161300/Glyma.18G206200/Glyma.18G029800/Glyma.08G013300/Glyma.14G073000/Glyma.18G074100/Glyma.10G279900/Glyma.04G077400…	104
8 h	03032	DNA replication proteins	129/4573	221/14423	1.77263e-16	9.86764e-15	7.6503e-15	Glyma.11G184100/Glyma.14G154200/Glyma.12G088300/Glyma.06G116100/Glyma.11G070700/Glyma.04G071600/Glyma.18G157402/Glyma.13G031500/Glyma.04G133700/Glyma.03G161300/Glyma.04G246600/Glyma.10G035700/Glyma.18G067800/Glyma.07G105000/Glyma.08G310900/Glyma.19G110900/Glyma.15G056100/Glyma.15G276000/Glyma.17G078700/Glyma.05G020600/Glyma.09G258700/Glyma.16G041400/Glyma.13G122100/Glyma.11G083600/Glyma.20G123000…	129
8 h	03050	Proteasome	74/4573	105/14423	3.3613e-16	1.40334e-14	1.088e-14	Glyma.16G057400/Glyma.04G249300/Glyma.10G295600/Glyma.05G079000/Glyma.17G127100/Glyma.13G031200/Glyma.08G286200/Glyma.04G078200/Glyma.03G170600/Glyma.07G155700/Glyma.14G071000/Glyma.09G161300/Glyma.18G206200/Glyma.18G029800/Glyma.14G073000/Glyma.10G279900/Glyma.04G077400/Glyma.17G252100/Glyma.11G199900/Glyma.06G171200/Glyma.10G043000/Glyma.20G245500/Glyma.18G050900/Glyma.12G147200/Glyma.14G152900…	74
8 h	03008	Ribosome biogenesis in eukaryotes	94/4573	147/14423	7.4425e-16	2.4858e-14	1.92722e-14	Glyma.19G110900/Glyma.15G056100/Glyma.16G041400/Glyma.18G020000/Glyma.04G200700/Glyma.08G176900/Glyma.19G165900/Glyma.10G022600/Glyma.11G152600/Glyma.17G128400/Glyma.02G151500/Glyma.17G115400/Glyma.11G114300/Glyma.07G032500/Glyma.05G046400/Glyma.06G164800/Glyma.11G237200/Glyma.17G029800/Glyma.04G139900/Glyma.17G083500/Glyma.04G069100/Glyma.14G196700/Glyma.20G161600/Glyma.07G261900/Glyma.19G186600…	94
8 h	03040	Spliceosome	148/4573	310/14423	1.99735e-09	5.55928e-08	4.31006e-08	Glyma.02G205600/Glyma.17G072400/Glyma.12G239000/Glyma.04G208600/Glyma.20G084000/Glyma.15G097500/Glyma.17G115400/Glyma.17G063100/Glyma.03G152100/Glyma.05G149300/Glyma.07G205500/Glyma.05G127900/Glyma.14G025900/Glyma.18G266500/Glyma.14G200400/Glyma.14G196700/Glyma.07G252700/Glyma.07G130900/Glyma.19G196100/Glyma.09G283300/Glyma.08G105900/Glyma.19G082500/Glyma.14G068500/Glyma.06G157100/Glyma.19G114900…	148
8 h	03030	DNA replication	54/4573	87/14423	5.11547e-09	1.2204e-07	9.46169e-08	Glyma.11G070700/Glyma.18G157402/Glyma.18G067800/Glyma.17G078700/Glyma.05G020600/Glyma.02G286600/Glyma.07G238400/Glyma.09G047300/Glyma.17G202200/Glyma.17G035000/Glyma.03G219200/Glyma.10G278800/Glyma.12G039200/Glyma.19G216100/Glyma.17G104000/Glyma.15G154900/Glyma.14G133400/Glyma.11G113300/Glyma.04G248900/Glyma.05G129700/Glyma.20G111700/Glyma.13G156400/Glyma.08G334900/Glyma.08G079500/Glyma.08G084400…	54
8 h	03012	Translation factors	120/4573	247/14423	1.91014e-08	3.98741e-07	3.0914e-07	Glyma.09G275000/Glyma.02G276600/Glyma.01G054000/Glyma.16G001900/Glyma.13G073200/Glyma.09G046000/Glyma.08G167900/Glyma.05G114900/Glyma.12G165301/Glyma.04G195100/Glyma.04G080800/Glyma.06G082500/Glyma.06G170900/Glyma.11G102400/Glyma.09G089600/Glyma.14G039100/Glyma.17G053200/Glyma.08G275900/Glyma.05G024200/Glyma.18G133400/Glyma.03G002400/Glyma.03G150600/Glyma.20G215000/Glyma.09G234100/Glyma.18G107500…	120
8 h	03013	RNA transport	128/4573	271/14423	5.35005e-08	9.92731e-07	7.69656e-07	Glyma.16G160800/Glyma.19G188700/Glyma.10G063700/Glyma.13G148200/Glyma.01G224700/Glyma.02G266200/Glyma.15G097500/Glyma.05G114900/Glyma.17G071100/Glyma.15G010000/Glyma.04G074200/Glyma.20G171200/Glyma.06G041700/Glyma.17G053200/Glyma.04G040700/Glyma.14G051300/Glyma.04G069100/Glyma.02G206900/Glyma.18G133400/Glyma.03G002400/Glyma.11G213900/Glyma.09G234100/Glyma.13G363900/Glyma.15G075100/Glyma.02G147200…	128
8 h	03060	Protein export	52/4573	90/14423	2.79246e-07	4.66341e-06	3.6155e-06	Glyma.06G227200/Glyma.08G284800/Glyma.08G025700/Glyma.12G171400/Glyma.03G239600/Glyma.12G070500/Glyma.01G133400/Glyma.03G034100/Glyma.12G156800/Glyma.13G327801/Glyma.05G219400/Glyma.08G025900/Glyma.10G156000/Glyma.08G103600/Glyma.05G146700/Glyma.14G053200/Glyma.08G336000/Glyma.19G236500/Glyma.02G258900/Glyma.10G156400/Glyma.08G101100/Glyma.05G144700/Glyma.10G032800/Glyma.13G268600/Glyma.12G230900…	52
8 h	09124	Replication and repair	109/4573	241/14423	6.51314e-06	9.88813e-05	7.66618e-05	Glyma.11G184100/Glyma.12G088300/Glyma.11G070700/Glyma.18G157402/Glyma.03G161300/Glyma.02G261800/Glyma.18G067800/Glyma.17G078700/Glyma.05G020600/Glyma.15G092000/Glyma.13G220400/Glyma.02G286600/Glyma.07G238400/Glyma.09G047300/Glyma.17G202200/Glyma.17G035000/Glyma.03G219200/Glyma.07G087700/Glyma.10G278800/Glyma.12G039200/Glyma.19G216100/Glyma.17G104000/Glyma.15G154900/Glyma.14G133400/Glyma.11G113300…	109
8 h	00196	Photosynthesis - antenna proteins	23/4573	33/14423	8.24706e-06	0.000114772	8.89815e-05	Glyma.02G305400/Glyma.16G165200/Glyma.16G165500/Glyma.12G219300/Glyma.13G282000/Glyma.05G128000/Glyma.14G008000/Glyma.08G074000/Glyma.16G165800/Glyma.16G145800/Glyma.09G154700/Glyma.08G082900/Glyma.20G212900/Glyma.01G115900/Glyma.15G052400/Glyma.03G060300/Glyma.02G309500/Glyma.16G016100/Glyma.08G180000/Glyma.10G177200/Glyma.07G047600/Glyma.03G262300/Glyma.16G205200	23
8 h	00300	Lysine biosynthesis	16/4573	20/14423	1.21206e-05	0.000155703	0.000120715	Glyma.03G022300/Glyma.16G028900/Glyma.08G063500/Glyma.09G268200/Glyma.18G221700/Glyma.07G060300/Glyma.05G240700/Glyma.08G047800/Glyma.03G181200/Glyma.07G185700/Glyma.05G151100/Glyma.19G174300/Glyma.08G107800/Glyma.19G182000/Glyma.03G173400/Glyma.13G140700	16
8 h	09121	Transcription	190/4573	465/14423	1.46409e-05	0.000174645	0.000135401	Glyma.02G205600/Glyma.17G072400/Glyma.03G129500/Glyma.17G050400/Glyma.12G239000/Glyma.04G208600/Glyma.20G084000/Glyma.18G281100/Glyma.15G097500/Glyma.17G115400/Glyma.17G063100/Glyma.03G152100/Glyma.05G149300/Glyma.03G178900/Glyma.07G205500/Glyma.05G127900/Glyma.14G025900/Glyma.18G212300/Glyma.18G266500/Glyma.14G200400/Glyma.02G035900/Glyma.14G196700/Glyma.07G252700/Glyma.07G130900/Glyma.19G196100…	190
8 h	03430	Mismatch repair	37/4573	65/14423	2.26707e-05	0.000252401	0.000195684	Glyma.11G070700/Glyma.18G067800/Glyma.17G078700/Glyma.05G020600/Glyma.17G202200/Glyma.07G087700/Glyma.10G278800/Glyma.14G133400/Glyma.04G248900/Glyma.20G111700/Glyma.08G120900/Glyma.08G334900/Glyma.08G079500/Glyma.17G121400/Glyma.01G158400/Glyma.05G163700/Glyma.17G130800/Glyma.09G213500/Glyma.09G189100/Glyma.05G124300/Glyma.12G206200/Glyma.01G030600/Glyma.05G014200/Glyma.06G114100/Glyma.12G231200…	37
8 h	04812	Cytoskeleton proteins	127/4573	311/14423	0.000373564	0.00389907	0.00302292	Glyma.08G106400/Glyma.05G149700/Glyma.13G310700/Glyma.15G150100/Glyma.03G237700/Glyma.09G136400/Glyma.20G234200/Glyma.12G191000/Glyma.13G133200/Glyma.19G235300/Glyma.18G180900/Glyma.10G154200/Glyma.15G063200/Glyma.20G207200/Glyma.10G182800/Glyma.01G190000/Glyma.11G052200/Glyma.08G041200/Glyma.15G252800/Glyma.20G234100/Glyma.02G296800/Glyma.20G159200/Glyma.19G235400/Glyma.08G062500/Glyma.13G251100…	127
8 h	00660	C5-Branched dibasic acid metabolism	11/4573	14/14423	0.000421815	0.00414371	0.00321258	Glyma.05G167700/Glyma.11G079000/Glyma.13G367900/Glyma.06G169700/Glyma.14G217300/Glyma.08G126100/Glyma.08G210500/Glyma.15G005400/Glyma.13G241000/Glyma.17G256102/Glyma.15G072500	11
8 h	00061	Fatty acid biosynthesis	41/4573	85/14423	0.00104998	0.00974145	0.00755247	Glyma.14G121400/Glyma.13G038600/Glyma.06G112900/Glyma.19G028800/Glyma.18G091100/Glyma.18G265300/Glyma.13G057400/Glyma.08G345900/Glyma.11G101400/Glyma.18G057700/Glyma.15G052500/Glyma.07G207200/Glyma.12G027300/Glyma.05G129600/Glyma.05G221100/Glyma.08G179900/Glyma.18G156100/Glyma.18G009200/Glyma.11G164500/Glyma.08G084300/Glyma.18G243500/Glyma.02G138100/Glyma.05G216600/Glyma.08G349200/Glyma.11G248000…	41
8 h	00220	Arginine biosynthesis	29/4573	56/14423	0.00139105	0.0122266	0.00947919	Glyma.05G146000/Glyma.19G111000/Glyma.01G204600/Glyma.05G046900/Glyma.01G131100/Glyma.14G213300/Glyma.10G044300/Glyma.07G179700/Glyma.11G047200/Glyma.04G073800/Glyma.05G066200/Glyma.07G104500/Glyma.17G128600/Glyma.05G046700/Glyma.20G009400/Glyma.11G043300/Glyma.01G194700/Glyma.05G236000/Glyma.06G096700/Glyma.04G030500/Glyma.06G030600/Glyma.04G094600/Glyma.17G216000/Glyma.06G082400/Glyma.20G000500…	29
8 h	02044	Secretion system	38/4573	79/14423	0.0016786	0.0133889	0.0103803	Glyma.09G171600/Glyma.13G191200/Glyma.07G106600/Glyma.06G227200/Glyma.08G284800/Glyma.12G171400/Glyma.12G070500/Glyma.01G133400/Glyma.03G034100/Glyma.12G156800/Glyma.13G327801/Glyma.14G053200/Glyma.08G336000/Glyma.02G258900/Glyma.05G048400/Glyma.10G156400/Glyma.08G101100/Glyma.05G144700/Glyma.10G032800/Glyma.13G268600/Glyma.12G230900/Glyma.02G141101/Glyma.11G155259/Glyma.02G036200/Glyma.05G200600…	38
8 h	03420	Nucleotide excision repair	50/4573	110/14423	0.00168363	0.0133889	0.0103803	Glyma.11G070700/Glyma.18G157402/Glyma.18G067800/Glyma.17G078700/Glyma.05G020600/Glyma.17G202200/Glyma.10G278800/Glyma.14G133400/Glyma.04G248900/Glyma.20G111700/Glyma.08G334900/Glyma.08G079500/Glyma.18G297400/Glyma.17G130800/Glyma.08G047000/Glyma.09G213500/Glyma.05G124300/Glyma.12G206200/Glyma.U032008/Glyma.01G030600/Glyma.08G223800/Glyma.06G114100/Glyma.12G231200/Glyma.04G210700/Glyma.12G096100/G…	50
8 h	03440	Homologous recombination	42/4573	90/14423	0.00206719	0.0156918	0.0121657	Glyma.02G261800/Glyma.17G078700/Glyma.05G020600/Glyma.15G092000/Glyma.13G220400/Glyma.17G202200/Glyma.10G278800/Glyma.14G133400/Glyma.10G014100/Glyma.20G111700/Glyma.13G010700/Glyma.08G079500/Glyma.09G213500/Glyma.13G115000/Glyma.17G045000/Glyma.U027200/Glyma.05G124300/Glyma.12G206200/Glyma.01G030600/Glyma.05G014200/Glyma.12G231200/Glyma.04G210700/Glyma.13G363400/Glyma.08G313400/Glyma.04G181200/G…	42
8 h	02048	Prokaryotic defense system	13/4573	20/14423	0.00223901	0.0162556	0.0126028	Glyma.11G083600/Glyma.18G089400/Glyma.20G090100/Glyma.08G322800/Glyma.01G007800/Glyma.10G141500/Glyma.04G187600/Glyma.14G017600/Glyma.03G195200/Glyma.02G295800/Glyma.19G194800/Glyma.01G160300/Glyma.10G071800	13
8 h	00333	Prodigiosin biosynthesis	8/4573	10/14423	0.00236723	0.0162556	0.0126028	Glyma.08G345900/Glyma.11G101400/Glyma.18G057700/Glyma.12G027300/Glyma.18G156100/Glyma.18G009200/Glyma.11G164500/Glyma.11G248000	8
8 h	00230	Purine metabolism	71/4573	168/14423	0.00243347	0.0162556	0.0126028	Glyma.05G146000/Glyma.10G121524/Glyma.19G182400/Glyma.16G173100/Glyma.04G065800/Glyma.11G047900/Glyma.02G182400/Glyma.03G189700/Glyma.09G126300/Glyma.03G109500/Glyma.05G000700/Glyma.14G115700/Glyma.19G000700/Glyma.19G091400/Glyma.15G073000/Glyma.10G178900/Glyma.05G045200/Glyma.07G115900/Glyma.06G067200/Glyma.07G258900/Glyma.10G156900/Glyma.05G186900/Glyma.15G106200/Glyma.10G241000/Glyma.12G036200…	71
8 h	00290	Valine, leucine and isoleucine biosynthesis	20/4573	37/14423	0.00394399	0.0253325	0.0196401	Glyma.07G186000/Glyma.07G186100/Glyma.05G167700/Glyma.13G291300/Glyma.20G245300/Glyma.11G045300/Glyma.11G079000/Glyma.13G367900/Glyma.06G169700/Glyma.14G217300/Glyma.08G126100/Glyma.08G210500/Glyma.12G122900/Glyma.15G005400/Glyma.13G241000/Glyma.17G256102/Glyma.15G072500/Glyma.10G295400/Glyma.13G207900/Glyma.12G210000	20
8 h	03018	RNA degradation	77/4573	188/14423	0.00442838	0.0273903	0.0212355	Glyma.14G021500/Glyma.09G261400/Glyma.16G160800/Glyma.19G188700/Glyma.10G063700/Glyma.13G148200/Glyma.07G269500/Glyma.08G199800/Glyma.06G208200/Glyma.17G052100/Glyma.12G239000/Glyma.06G088600/Glyma.08G192700/Glyma.02G293100/Glyma.04G086900/Glyma.02G112000/Glyma.05G149300/Glyma.18G092700/Glyma.20G171200/Glyma.06G041700/Glyma.05G127900/Glyma.04G040700/Glyma.19G190900/Glyma.09G261100/Glyma.13G107300…	77
8 h	00261	Monobactam biosynthesis	10/4573	15/14423	0.00569103	0.0339429	0.0263156	Glyma.03G022300/Glyma.16G028900/Glyma.09G268200/Glyma.18G221700/Glyma.07G060300/Glyma.05G240700/Glyma.08G047800/Glyma.05G151100/Glyma.08G107800/Glyma.10G242600	10
8 h	03110	Chaperones and folding catalysts	183/4573	494/14423	0.0059018	0.0339862	0.0263492	Glyma.02G252800/Glyma.14G063700/Glyma.02G076600/Glyma.02G205600/Glyma.15G077700/Glyma.16G052800/Glyma.07G200000/Glyma.02G187800/Glyma.19G096600/Glyma.10G195200/Glyma.08G212000/Glyma.17G072400/Glyma.20G240000/Glyma.03G232000/Glyma.18G094600/Glyma.04G247900/Glyma.12G136400/Glyma.14G063800/Glyma.11G146800/Glyma.13G176000/Glyma.06G114800/Glyma.13G077300/Glyma.07G200200/Glyma.02G266900/Glyma.08G025700…	183
8 h	09104	Nucleotide metabolism	94/4573	239/14423	0.00719112	0.0400306	0.0310354	Glyma.05G146000/Glyma.10G121524/Glyma.14G021000/Glyma.02G293500/Glyma.15G217500/Glyma.03G089400/Glyma.19G182400/Glyma.16G173100/Glyma.08G232600/Glyma.04G065800/Glyma.11G047900/Glyma.02G182400/Glyma.03G189700/Glyma.09G126300/Glyma.03G109500/Glyma.05G000700/Glyma.14G115700/Glyma.19G000700/Glyma.19G091400/Glyma.15G073000/Glyma.10G178900/Glyma.05G045200/Glyma.18G048400/Glyma.07G115900/Glyma.06G067200…	94
8 h	00010	Glycolysis / Gluconeogenesis	95/4573	243/14423	0.00837302	0.0451063	0.0349705	Glyma.13G035200/Glyma.01G118000/Glyma.01G116700/Glyma.10G041000/Glyma.14G121200/Glyma.16G173100/Glyma.07G269500/Glyma.05G058100/Glyma.06G122600/Glyma.03G189700/Glyma.08G199800/Glyma.07G241600/Glyma.09G126300/Glyma.06G208200/Glyma.05G000700/Glyma.16G018300/Glyma.18G257700/Glyma.18G200300/Glyma.06G105600/Glyma.19G000700/Glyma.10G178900/Glyma.13G231700/Glyma.06G088600/Glyma.18G137300/Glyma.01G019200…	95
8 h	00603	Glycosphingolipid biosynthesis - globo and isoglobo series	11/4573	18/14423	0.00957751	0.0499826	0.0387511	Glyma.12G088100/Glyma.10G174500/Glyma.09G273400/Glyma.20G216000/Glyma.20G240000/Glyma.18G215700/Glyma.13G241600/Glyma.10G290900/Glyma.08G159500/Glyma.18G286200/Glyma.06G144100	11
12 h	03009	Ribosome biogenesis	240/4347	469/14423	3.31094e-22	5.52927e-20	4.21709e-20	Glyma.02G205600/Glyma.14G013102/Glyma.11G155468/Glyma.17G072400/Glyma.19G110900/Glyma.15G056100/Glyma.16G041400/Glyma.18G020000/Glyma.10G022600/Glyma.08G058500/Glyma.07G170800/Glyma.08G176900/Glyma.17G125700/Glyma.14G115100/Glyma.07G032500/Glyma.09G023100/Glyma.19G165900/Glyma.11G114300/Glyma.11G152600/Glyma.17G115400/Glyma.10G200300/Glyma.04G200700/Glyma.06G071900/Glyma.13G167900/Glyma.02G273000…	240
12 h	03051	03051	100/4347	164/14423	2.19155e-16	1.82994e-14	1.39567e-14	Glyma.02G205600/Glyma.17G072400/Glyma.06G236100/Glyma.07G170800/Glyma.05G079000/Glyma.18G297400/Glyma.01G055500/Glyma.08G286200/Glyma.08G013300/Glyma.17G127100/Glyma.10G295600/Glyma.04G078200/Glyma.07G155700/Glyma.18G029800/Glyma.14G071000/Glyma.04G249300/Glyma.09G161300/Glyma.03G170600/Glyma.18G206200/Glyma.08G223800/Glyma.18G138900/Glyma.05G206400/Glyma.14G073000/Glyma.11G199900/Glyma.18G050900…	100
12 h	03050	Proteasome	70/4347	105/14423	1.06298e-14	5.91724e-13	4.51299e-13	Glyma.05G079000/Glyma.08G286200/Glyma.17G127100/Glyma.10G295600/Glyma.04G078200/Glyma.07G155700/Glyma.18G029800/Glyma.14G071000/Glyma.04G249300/Glyma.09G161300/Glyma.03G170600/Glyma.18G206200/Glyma.18G138900/Glyma.14G073000/Glyma.11G199900/Glyma.18G050900/Glyma.10G043000/Glyma.16G126300/Glyma.13G031200/Glyma.12G147200/Glyma.03G262800/Glyma.17G252100/Glyma.19G072100/Glyma.06G171200/Glyma.20G245500…	70
12 h	03008	Ribosome biogenesis in eukaryotes	83/4347	147/14423	2.50932e-11	1.04764e-09	7.9902e-10	Glyma.19G110900/Glyma.15G056100/Glyma.16G041400/Glyma.18G020000/Glyma.10G022600/Glyma.08G176900/Glyma.07G032500/Glyma.19G165900/Glyma.11G114300/Glyma.11G152600/Glyma.17G115400/Glyma.04G200700/Glyma.17G233900/Glyma.08G013300/Glyma.17G128400/Glyma.02G151500/Glyma.11G142700/Glyma.05G046400/Glyma.15G059400/Glyma.17G029800/Glyma.14G089042/Glyma.07G204700/Glyma.11G213900/Glyma.04G069100/Glyma.05G206400…	83
12 h	03012	Translation factors	118/4347	247/14423	3.36943e-09	1.12539e-07	8.58318e-08	Glyma.09G275000/Glyma.18G107500/Glyma.16G001900/Glyma.05G114900/Glyma.02G276600/Glyma.13G073200/Glyma.05G041900/Glyma.06G082500/Glyma.12G165301/Glyma.04G080800/Glyma.01G054000/Glyma.17G053200/Glyma.08G167900/Glyma.15G075100/Glyma.09G046000/Glyma.11G227900/Glyma.04G195100/Glyma.19G052400/Glyma.06G170900/Glyma.08G170000/Glyma.14G039100/Glyma.15G259600/Glyma.08G290700/Glyma.08G305200/Glyma.09G234100…	118
12 h	00196	Photosynthesis - antenna proteins	26/4347	33/14423	1.07231e-08	2.98459e-07	2.2763e-07	Glyma.02G305400/Glyma.16G165200/Glyma.16G165500/Glyma.05G128000/Glyma.14G008000/Glyma.12G219300/Glyma.13G282000/Glyma.08G074000/Glyma.16G145800/Glyma.20G212900/Glyma.08G082900/Glyma.01G115900/Glyma.16G165800/Glyma.09G154700/Glyma.15G052400/Glyma.03G060300/Glyma.16G016100/Glyma.02G309500/Glyma.08G180000/Glyma.10G177200/Glyma.07G047600/Glyma.03G262300/Glyma.16G205200/Glyma.18G028400/Glyma.06G194900…	26
12 h	03013	RNA transport	122/4347	271/14423	1.32054e-07	3.00162e-06	2.28929e-06	Glyma.13G148200/Glyma.16G160800/Glyma.19G188700/Glyma.01G224700/Glyma.02G266200/Glyma.05G114900/Glyma.15G097500/Glyma.20G171200/Glyma.14G051300/Glyma.06G041700/Glyma.15G010000/Glyma.04G074200/Glyma.17G053200/Glyma.19G240700/Glyma.15G075100/Glyma.11G227900/Glyma.19G052400/Glyma.04G040700/Glyma.13G363900/Glyma.02G206900/Glyma.01G067900/Glyma.17G071100/Glyma.08G290700/Glyma.09G234100/Glyma.03G002400…	122
12 h	03060	Protein export	51/4347	90/14423	1.4379e-07	3.00162e-06	2.28929e-06	Glyma.06G227200/Glyma.08G025700/Glyma.03G239600/Glyma.12G156800/Glyma.05G219400/Glyma.12G171400/Glyma.03G034100/Glyma.08G025900/Glyma.12G070500/Glyma.10G156000/Glyma.01G133400/Glyma.08G284800/Glyma.10G156400/Glyma.05G146700/Glyma.08G336000/Glyma.13G327801/Glyma.12G230900/Glyma.08G101100/Glyma.08G103600/Glyma.14G053200/Glyma.13G268600/Glyma.05G144700/Glyma.19G236500/Glyma.02G258900/Glyma.08G008000…	51
12 h	03032	DNA replication proteins	102/4347	221/14423	3.23795e-07	6.0082e-06	4.58236e-06	Glyma.11G184100/Glyma.11G070700/Glyma.12G088300/Glyma.14G154200/Glyma.04G246600/Glyma.03G161300/Glyma.06G116100/Glyma.13G031500/Glyma.19G110900/Glyma.15G056100/Glyma.18G067800/Glyma.16G041400/Glyma.04G133700/Glyma.08G310900/Glyma.15G276000/Glyma.10G035700/Glyma.08G176900/Glyma.17G035000/Glyma.05G020600/Glyma.04G208600/Glyma.17G202200/Glyma.14G133400/Glyma.09G258700/Glyma.13G122100/Glyma.19G165900…	102
12 h	00194	Photosynthesis proteins	68/4347	142/14423	6.11881e-06	0.000102184	7.79343e-05	Glyma.02G305400/Glyma.12G169500/Glyma.16G165200/Glyma.16G165500/Glyma.13G357300/Glyma.05G128000/Glyma.14G008000/Glyma.12G219300/Glyma.12G092000/Glyma.13G282000/Glyma.11G183300/Glyma.12G169600/Glyma.08G074000/Glyma.05G022900/Glyma.02G282500/Glyma.11G181100/Glyma.16G145800/Glyma.17G154900/Glyma.20G212900/Glyma.08G082900/Glyma.01G115900/Glyma.16G165800/Glyma.02G141700/Glyma.09G154700/Glyma.15G052400…	68
12 h	03030	DNA replication	46/4347	87/14423	7.64308e-06	0.000116036	8.84988e-05	Glyma.11G070700/Glyma.18G067800/Glyma.17G035000/Glyma.05G020600/Glyma.17G202200/Glyma.14G133400/Glyma.02G286600/Glyma.07G238400/Glyma.09G047300/Glyma.04G248900/Glyma.03G219200/Glyma.17G078700/Glyma.08G313400/Glyma.11G113300/Glyma.06G310500/Glyma.17G104000/Glyma.10G278800/Glyma.15G154900/Glyma.19G216100/Glyma.05G129700/Glyma.09G213500/Glyma.08G334900/Glyma.18G009300/Glyma.08G084400/Glyma.17G130800…	46
12 h	00010	Glycolysis / Gluconeogenesis	104/4347	243/14423	1.69697e-05	0.000236161	0.000180117	Glyma.13G035200/Glyma.14G121200/Glyma.01G118000/Glyma.01G024800/Glyma.16G173100/Glyma.01G116700/Glyma.03G189700/Glyma.10G041000/Glyma.07G269500/Glyma.05G000700/Glyma.05G058100/Glyma.08G199800/Glyma.06G122600/Glyma.07G241600/Glyma.09G126300/Glyma.16G018300/Glyma.01G019200/Glyma.19G000700/Glyma.18G200300/Glyma.06G208200/Glyma.15G143100/Glyma.10G178900/Glyma.06G105600/Glyma.19G017200/Glyma.18G257700…	104
12 h	02044	Secretion system	41/4347	79/14423	4.1698e-05	0.000535659	0.000408539	Glyma.13G191200/Glyma.09G171600/Glyma.06G227200/Glyma.05G048400/Glyma.07G106600/Glyma.12G156800/Glyma.12G171400/Glyma.03G034100/Glyma.12G070500/Glyma.01G133400/Glyma.08G284800/Glyma.10G156400/Glyma.08G336000/Glyma.13G327801/Glyma.12G230900/Glyma.08G101100/Glyma.14G053200/Glyma.13G268600/Glyma.05G144700/Glyma.02G258900/Glyma.08G008000/Glyma.05G200600/Glyma.18G071100/Glyma.02G036200/Glyma.11G155259…	41
12 h	04141	Protein processing in endoplasmic reticulum	150/4347	379/14423	4.56459e-05	0.00054449	0.000415275	Glyma.02G252800/Glyma.14G063700/Glyma.02G076600/Glyma.04G186000/Glyma.02G205600/Glyma.06G180000/Glyma.17G072400/Glyma.13G077300/Glyma.07G200000/Glyma.18G094600/Glyma.03G232000/Glyma.04G247900/Glyma.13G176000/Glyma.06G054700/Glyma.06G227200/Glyma.16G050800/Glyma.06G114800/Glyma.12G151200/Glyma.07G200200/Glyma.14G063800/Glyma.11G146800/Glyma.20G065900/Glyma.02G266900/Glyma.11G098300/Glyma.19G099900…	150
12 h	00220	Arginine biosynthesis	31/4347	56/14423	7.29064e-05	0.000811692	0.000619065	Glyma.05G146000/Glyma.01G204600/Glyma.19G111000/Glyma.05G046900/Glyma.01G131100/Glyma.14G213300/Glyma.16G153400/Glyma.07G179700/Glyma.07G104500/Glyma.11G047200/Glyma.10G044300/Glyma.04G030500/Glyma.01G194700/Glyma.17G216000/Glyma.06G082400/Glyma.17G128600/Glyma.06G030600/Glyma.04G073800/Glyma.05G046700/Glyma.05G236000/Glyma.20G009400/Glyma.04G094600/Glyma.06G096700/Glyma.11G043300/Glyma.20G000500…	31
12 h	00061	Fatty acid biosynthesis	42/4347	85/14423	0.000145436	0.00151799	0.00115775	Glyma.14G121400/Glyma.13G038600/Glyma.19G028800/Glyma.06G112900/Glyma.18G265300/Glyma.13G057400/Glyma.08G345900/Glyma.15G052500/Glyma.11G101400/Glyma.18G057700/Glyma.12G027300/Glyma.07G207200/Glyma.05G129600/Glyma.05G221100/Glyma.11G164500/Glyma.18G156100/Glyma.08G084300/Glyma.18G009200/Glyma.08G179900/Glyma.02G138100/Glyma.08G349200/Glyma.18G243500/Glyma.09G277400/Glyma.13G010100/Glyma.08G027600…	42
12 h	09124	Replication and repair	99/4347	241/14423	0.000177971	0.0017412	0.00132798	Glyma.11G184100/Glyma.11G070700/Glyma.12G088300/Glyma.02G261800/Glyma.03G161300/Glyma.18G067800/Glyma.U032008/Glyma.08G047000/Glyma.17G121400/Glyma.17G035000/Glyma.05G020600/Glyma.17G202200/Glyma.14G133400/Glyma.18G297400/Glyma.13G366800/Glyma.02G286600/Glyma.07G238400/Glyma.09G047300/Glyma.04G248900/Glyma.03G219200/Glyma.17G078700/Glyma.13G010700/Glyma.08G313400/Glyma.11G113300/Glyma.06G310500/G…	99
12 h	03040	Spliceosome	123/4347	310/14423	0.000187674	0.0017412	0.00132798	Glyma.02G205600/Glyma.17G072400/Glyma.12G239000/Glyma.07G170800/Glyma.15G097500/Glyma.04G208600/Glyma.17G115400/Glyma.20G084000/Glyma.07G205500/Glyma.18G266500/Glyma.07G252700/Glyma.09G283300/Glyma.14G025900/Glyma.03G152100/Glyma.17G063100/Glyma.20G075100/Glyma.05G149300/Glyma.19G114900/Glyma.05G127900/Glyma.14G196700/Glyma.16G063000/Glyma.10G192200/Glyma.11G199100/Glyma.20G198200/Glyma.04G133800…	123
12 h	00620	Pyruvate metabolism	73/4347	169/14423	0.000205544	0.00180662	0.00137788	Glyma.16G173100/Glyma.03G189700/Glyma.01G091000/Glyma.19G028800/Glyma.06G229900/Glyma.05G000700/Glyma.09G004300/Glyma.05G058100/Glyma.18G265300/Glyma.01G146300/Glyma.07G241600/Glyma.09G126300/Glyma.16G018300/Glyma.13G057400/Glyma.01G019200/Glyma.19G000700/Glyma.15G143100/Glyma.05G227400/Glyma.10G178900/Glyma.05G221100/Glyma.18G137300/Glyma.10G215400/Glyma.20G114500/Glyma.09G193800/Glyma.18G243500…	73
12 h	00250	Alanine, aspartate and glutamate metabolism	45/4347	94/14423	0.000218233	0.00182225	0.0013898	Glyma.04G042100/Glyma.06G043000/Glyma.01G204600/Glyma.19G111000/Glyma.02G293500/Glyma.14G021000/Glyma.05G046900/Glyma.01G131100/Glyma.18G210500/Glyma.14G213300/Glyma.05G182600/Glyma.16G153400/Glyma.07G104500/Glyma.15G263500/Glyma.02G241400/Glyma.11G240200/Glyma.13G328600/Glyma.17G238200/Glyma.17G216000/Glyma.06G082400/Glyma.18G017200/Glyma.12G036200/Glyma.17G128600/Glyma.08G163700/Glyma.05G046700…	45
12 h	00660	C5-Branched dibasic acid metabolism	11/4347	14/14423	0.000256236	0.00203768	0.00155411	Glyma.05G167700/Glyma.06G169700/Glyma.14G217300/Glyma.13G367900/Glyma.08G126100/Glyma.08G210500/Glyma.17G256102/Glyma.13G241000/Glyma.11G079000/Glyma.15G005400/Glyma.15G072500	11
12 h	00300	Lysine biosynthesis	14/4347	20/14423	0.000272895	0.00207152	0.00157992	Glyma.08G063500/Glyma.09G268200/Glyma.16G028900/Glyma.07G060300/Glyma.18G221700/Glyma.05G240700/Glyma.05G151100/Glyma.03G181200/Glyma.07G185700/Glyma.08G047800/Glyma.19G174300/Glyma.08G107800/Glyma.03G173400/Glyma.13G140700	14
12 h	09104	Nucleotide metabolism	96/4347	239/14423	0.000556831	0.00404308	0.00308359	Glyma.05G146000/Glyma.10G121524/Glyma.02G293500/Glyma.14G021000/Glyma.15G217500/Glyma.03G089400/Glyma.19G182400/Glyma.16G173100/Glyma.11G047900/Glyma.03G189700/Glyma.04G065800/Glyma.02G182400/Glyma.05G000700/Glyma.08G232600/Glyma.09G126300/Glyma.15G106200/Glyma.19G000700/Glyma.14G115700/Glyma.03G109500/Glyma.10G178900/Glyma.05G048400/Glyma.15G073000/Glyma.13G328600/Glyma.07G115900/Glyma.07G258900…	96
12 h	00860	Porphyrin and chlorophyll metabolism	36/4347	74/14423	0.000614903	0.0042787	0.0032633	Glyma.06G247100/Glyma.03G137000/Glyma.12G222200/Glyma.20G090100/Glyma.17G100700/Glyma.02G273800/Glyma.14G185700/Glyma.14G010400/Glyma.10G141500/Glyma.04G002900/Glyma.11G192300/Glyma.13G078400/Glyma.03G119500/Glyma.15G080200/Glyma.08G007900/Glyma.18G021500/Glyma.15G097700/Glyma.13G232500/Glyma.05G026200/Glyma.05G200500/Glyma.10G097800/Glyma.04G037000/Glyma.04G247700/Glyma.12G082100/Glyma.06G002900…	36
12 h	03110	Chaperones and folding catalysts	182/4347	494/14423	0.000681836	0.00455466	0.00347377	Glyma.02G252800/Glyma.14G063700/Glyma.02G076600/Glyma.02G205600/Glyma.15G077700/Glyma.10G195200/Glyma.17G072400/Glyma.13G077300/Glyma.07G200000/Glyma.16G052800/Glyma.18G094600/Glyma.03G232000/Glyma.04G247900/Glyma.13G176000/Glyma.20G240000/Glyma.06G073300/Glyma.06G054700/Glyma.06G114800/Glyma.12G136400/Glyma.07G200200/Glyma.14G063800/Glyma.11G146800/Glyma.20G065900/Glyma.02G266900/Glyma.16G153200…	182
12 h	00230	Purine metabolism	70/4347	168/14423	0.000933996	0.00578929	0.00441541	Glyma.05G146000/Glyma.10G121524/Glyma.19G182400/Glyma.16G173100/Glyma.11G047900/Glyma.03G189700/Glyma.04G065800/Glyma.02G182400/Glyma.05G000700/Glyma.09G126300/Glyma.15G106200/Glyma.19G000700/Glyma.14G115700/Glyma.03G109500/Glyma.10G178900/Glyma.15G073000/Glyma.07G115900/Glyma.07G258900/Glyma.10G241000/Glyma.10G156900/Glyma.10G201100/Glyma.05G045200/Glyma.18G036300/Glyma.10G227800/Glyma.12G036200…	70
12 h	03430	Mismatch repair	32/4347	65/14423	0.000935993	0.00578929	0.00441541	Glyma.11G070700/Glyma.18G067800/Glyma.17G121400/Glyma.05G020600/Glyma.17G202200/Glyma.14G133400/Glyma.04G248900/Glyma.17G078700/Glyma.10G278800/Glyma.07G087700/Glyma.01G158400/Glyma.09G213500/Glyma.05G163700/Glyma.08G334900/Glyma.08G120900/Glyma.17G130800/Glyma.08G079500/Glyma.05G014200/Glyma.20G111700/Glyma.09G189100/Glyma.05G089100/Glyma.12G206200/Glyma.01G030600/Glyma.12G231200/Glyma.12G096100…	32
12 h	00333	Prodigiosin biosynthesis	8/4347	10/14423	0.00163903	0.00973352	0.00742361	Glyma.08G345900/Glyma.11G101400/Glyma.18G057700/Glyma.12G027300/Glyma.11G164500/Glyma.18G156100/Glyma.18G009200/Glyma.11G248000	8
12 h	00970	Aminoacyl-tRNA biosynthesis	37/4347	80/14423	0.00169025	0.00973352	0.00742361	Glyma.20G090100/Glyma.10G141500/Glyma.11G034100/Glyma.13G000200/Glyma.08G363700/Glyma.01G032500/Glyma.12G043200/Glyma.03G224500/Glyma.10G239500/Glyma.01G208100/Glyma.10G289600/Glyma.10G155000/Glyma.11G117800/Glyma.05G234900/Glyma.08G031100/Glyma.12G020700/Glyma.13G152678/Glyma.14G101500/Glyma.20G233300/Glyma.19G221400/Glyma.12G018400/Glyma.17G223600/Glyma.10G272800/Glyma.01G006400/Glyma.11G102100…	37
12 h	01007	Amino acid related enzymes	59/4347	141/14423	0.00200068	0.0109158	0.00832533	Glyma.07G186000/Glyma.07G186100/Glyma.01G131100/Glyma.18G210500/Glyma.08G063500/Glyma.05G182600/Glyma.20G090100/Glyma.17G216000/Glyma.06G082400/Glyma.11G045300/Glyma.06G235500/Glyma.10G141500/Glyma.11G034100/Glyma.04G002900/Glyma.13G000200/Glyma.08G363700/Glyma.01G032500/Glyma.07G185700/Glyma.12G043200/Glyma.06G235900/Glyma.03G224500/Glyma.10G239500/Glyma.01G208100/Glyma.10G289600/Glyma.10G155000…	59
12 h	00290	Valine, leucine and isoleucine biosynthesis	20/4347	37/14423	0.00202629	0.0109158	0.00832533	Glyma.07G186000/Glyma.07G186100/Glyma.05G167700/Glyma.13G291300/Glyma.11G045300/Glyma.20G245300/Glyma.06G169700/Glyma.14G217300/Glyma.13G367900/Glyma.08G126100/Glyma.08G210500/Glyma.17G256102/Glyma.12G122900/Glyma.13G241000/Glyma.11G079000/Glyma.13G207900/Glyma.10G295400/Glyma.15G005400/Glyma.15G072500/Glyma.12G210000	20
12 h	00030	Pentose phosphate pathway	44/4347	100/14423	0.00225994	0.011794	0.00899514	Glyma.01G024800/Glyma.07G269500/Glyma.08G199800/Glyma.05G056400/Glyma.19G017200/Glyma.06G088600/Glyma.13G263400/Glyma.05G199800/Glyma.10G241000/Glyma.02G222400/Glyma.19G038400/Glyma.08G020500/Glyma.14G189400/Glyma.04G086900/Glyma.06G133500/Glyma.08G044100/Glyma.07G160500/Glyma.07G263800/Glyma.11G111100/Glyma.15G112300/Glyma.05G070500/Glyma.20G007400/Glyma.04G032600/Glyma.09G007900/Glyma.17G075300…	44
12 h	03018	RNA degradation	75/4347	188/14423	0.00261086	0.0132125	0.010077	Glyma.13G148200/Glyma.01G024800/Glyma.16G160800/Glyma.09G261400/Glyma.19G188700/Glyma.14G021500/Glyma.02G293100/Glyma.07G269500/Glyma.12G239000/Glyma.08G199800/Glyma.06G208200/Glyma.06G088600/Glyma.17G052100/Glyma.08G192700/Glyma.16G204600/Glyma.20G171200/Glyma.06G041700/Glyma.02G112000/Glyma.18G092700/Glyma.04G086900/Glyma.19G190900/Glyma.04G040700/Glyma.09G261100/Glyma.07G009600/Glyma.10G127800…	75
12 h	00020	Citrate cycle (TCA cycle)	41/4347	94/14423	0.00379205	0.0186256	0.0142055	Glyma.19G226100/Glyma.07G241600/Glyma.16G018300/Glyma.01G019200/Glyma.15G143100/Glyma.10G215400/Glyma.20G114500/Glyma.07G049600/Glyma.05G026300/Glyma.08G159900/Glyma.05G141000/Glyma.02G042100/Glyma.08G096300/Glyma.17G100600/Glyma.09G203500/Glyma.17G032300/Glyma.02G005500/Glyma.14G092100/Glyma.14G001900/Glyma.17G231400/Glyma.16G004400/Glyma.03G261000/Glyma.12G159300/Glyma.20G176300/Glyma.02G292500…	41
12 h	04812	Cytoskeleton proteins	115/4347	311/14423	0.00531146	0.0247156	0.0188502	Glyma.15G150100/Glyma.05G149700/Glyma.19G235300/Glyma.08G106400/Glyma.11G052200/Glyma.10G182800/Glyma.09G136400/Glyma.19G235400/Glyma.20G159200/Glyma.10G154200/Glyma.12G191000/Glyma.11G253200/Glyma.13G133200/Glyma.15G063200/Glyma.09G043100/Glyma.15G252800/Glyma.19G000900/Glyma.17G123400/Glyma.18G180900/Glyma.13G310700/Glyma.20G207200/Glyma.18G082000/Glyma.19G137500/Glyma.19G195300/Glyma.10G045500…	115
12 h	02048	Prokaryotic defense system	12/4347	20/14423	0.00532792	0.0247156	0.0188502	Glyma.18G089400/Glyma.20G090100/Glyma.10G141500/Glyma.08G322800/Glyma.11G083600/Glyma.14G017600/Glyma.03G195200/Glyma.04G187600/Glyma.01G007800/Glyma.19G194800/Glyma.02G295800/Glyma.10G071800	12
12 h	00603	Glycosphingolipid biosynthesis - globo and isoglobo series	11/4347	18/14423	0.00628395	0.0283627	0.0216318	Glyma.20G216000/Glyma.12G088100/Glyma.09G273400/Glyma.18G215700/Glyma.20G240000/Glyma.10G174500/Glyma.13G241600/Glyma.08G159500/Glyma.18G286200/Glyma.10G290900/Glyma.06G144100	11
12 h	00640	Propanoate metabolism	29/4347	64/14423	0.00727608	0.0319765	0.024388	Glyma.19G028800/Glyma.05G058100/Glyma.18G265300/Glyma.07G241600/Glyma.13G057400/Glyma.15G143100/Glyma.05G221100/Glyma.18G243500/Glyma.08G027600/Glyma.04G212100/Glyma.17G032300/Glyma.14G102600/Glyma.18G195900/Glyma.03G056400/Glyma.05G232600/Glyma.07G183600/Glyma.04G243000/Glyma.09G248900/Glyma.01G207500/Glyma.17G037900/Glyma.08G066600/Glyma.08G040000/Glyma.07G268550/Glyma.05G062200/Glyma.10G039000…	29
12 h	03420	Nucleotide excision repair	45/4347	110/14423	0.0102763	0.0440037	0.0335609	Glyma.11G070700/Glyma.18G067800/Glyma.U032008/Glyma.08G047000/Glyma.05G020600/Glyma.17G202200/Glyma.14G133400/Glyma.18G297400/Glyma.04G248900/Glyma.17G078700/Glyma.08G313400/Glyma.10G278800/Glyma.08G223800/Glyma.09G213500/Glyma.08G334900/Glyma.17G130800/Glyma.08G079500/Glyma.05G140800/Glyma.20G111700/Glyma.05G089100/Glyma.14G025300/Glyma.12G206200/Glyma.19G036900/Glyma.20G114700/Glyma.08G262900/G…	45
16 h	03009	Ribosome biogenesis	220/4207	469/14423	1.23656e-16	2.06505e-14	1.54895e-14	Glyma.02G205600/Glyma.17G072400/Glyma.14G013102/Glyma.19G110900/Glyma.15G056100/Glyma.16G041400/Glyma.18G020000/Glyma.13G107200/Glyma.04G200700/Glyma.15G254100/Glyma.20G235400/Glyma.06G071900/Glyma.19G165900/Glyma.11G103700/Glyma.12G028500/Glyma.08G176900/Glyma.04G069900/Glyma.17G128400/Glyma.08G058500/Glyma.11G237200/Glyma.10G006200/Glyma.08G173300/Glyma.14G115100/Glyma.11G152600/Glyma.17G115400…	220
16 h	03032	DNA replication proteins	121/4207	221/14423	1.10407e-15	9.21897e-14	6.91495e-14	Glyma.11G070700/Glyma.06G116100/Glyma.13G031500/Glyma.04G246600/Glyma.14G154200/Glyma.07G100600/Glyma.04G071600/Glyma.13G122100/Glyma.08G310900/Glyma.15G276000/Glyma.11G083600/Glyma.17G104000/Glyma.19G216100/Glyma.01G046400/Glyma.03G161300/Glyma.10G268100/Glyma.09G047300/Glyma.04G133700/Glyma.09G258700/Glyma.17G078700/Glyma.05G020600/Glyma.17G035000/Glyma.19G110900/Glyma.12G039200/Glyma.05G129700…	121
16 h	03050	Proteasome	69/4207	105/14423	8.17751e-15	4.55215e-13	3.41447e-13	Glyma.14G071000/Glyma.13G031200/Glyma.05G079000/Glyma.07G155700/Glyma.08G286200/Glyma.17G253600/Glyma.17G127100/Glyma.04G077400/Glyma.10G295600/Glyma.10G279900/Glyma.14G073000/Glyma.17G252100/Glyma.03G170600/Glyma.04G249300/Glyma.09G161300/Glyma.03G262800/Glyma.11G199900/Glyma.04G078200/Glyma.20G245500/Glyma.18G029800/Glyma.18G206200/Glyma.08G048800/Glyma.01G165100/Glyma.06G021600/Glyma.01G011100…	69
16 h	03051	03051	94/4207	164/14423	4.15618e-14	1.73521e-12	1.30154e-12	Glyma.02G205600/Glyma.17G072400/Glyma.06G236100/Glyma.01G055500/Glyma.14G071000/Glyma.08G332900/Glyma.13G031200/Glyma.14G011600/Glyma.05G079000/Glyma.07G155700/Glyma.18G074100/Glyma.08G286200/Glyma.17G253600/Glyma.02G302500/Glyma.17G127100/Glyma.04G077400/Glyma.18G297400/Glyma.10G295600/Glyma.10G279900/Glyma.13G371600/Glyma.14G073000/Glyma.17G252100/Glyma.19G172200/Glyma.03G170600/Glyma.04G249300…	94
16 h	03030	DNA replication	53/4207	87/14423	6.97801e-10	2.33066e-08	1.74818e-08	Glyma.11G070700/Glyma.17G104000/Glyma.19G216100/Glyma.09G047300/Glyma.17G078700/Glyma.05G020600/Glyma.17G035000/Glyma.12G039200/Glyma.05G129700/Glyma.02G286600/Glyma.18G067800/Glyma.03G219200/Glyma.11G113300/Glyma.10G278800/Glyma.07G238400/Glyma.15G154900/Glyma.20G111700/Glyma.06G310500/Glyma.18G009300/Glyma.17G130800/Glyma.17G202200/Glyma.08G105600/Glyma.08G084400/Glyma.14G133400/Glyma.08G334900…	53
16 h	03008	Ribosome biogenesis in eukaryotes	77/4207	147/14423	2.64593e-09	7.36451e-08	5.52396e-08	Glyma.19G110900/Glyma.15G056100/Glyma.16G041400/Glyma.18G020000/Glyma.04G200700/Glyma.19G165900/Glyma.08G176900/Glyma.17G128400/Glyma.11G237200/Glyma.11G152600/Glyma.17G115400/Glyma.11G114300/Glyma.04G069100/Glyma.10G022600/Glyma.02G151500/Glyma.07G032500/Glyma.04G139900/Glyma.05G046400/Glyma.07G261900/Glyma.17G029800/Glyma.14G196700/Glyma.12G040200/Glyma.19G186600/Glyma.17G083500/Glyma.17G233900…	77
16 h	09124	Replication and repair	110/4207	241/14423	3.53566e-08	8.43509e-07	6.32698e-07	Glyma.11G070700/Glyma.07G100600/Glyma.02G261800/Glyma.17G104000/Glyma.19G216100/Glyma.15G092000/Glyma.03G161300/Glyma.09G189100/Glyma.09G047300/Glyma.17G078700/Glyma.05G020600/Glyma.17G035000/Glyma.12G039200/Glyma.05G129700/Glyma.02G286600/Glyma.18G067800/Glyma.03G219200/Glyma.11G113300/Glyma.10G278800/Glyma.07G238400/Glyma.15G154900/Glyma.20G111700/Glyma.06G310500/Glyma.10G014100/Glyma.07G087700…	110
16 h	04812	Cytoskeleton proteins	132/4207	311/14423	3.20645e-07	6.69347e-06	5.02063e-06	Glyma.20G234100/Glyma.10G154200/Glyma.11G052200/Glyma.03G237700/Glyma.12G191000/Glyma.08G106400/Glyma.18G082000/Glyma.15G063200/Glyma.15G150100/Glyma.13G310700/Glyma.01G190000/Glyma.02G302800/Glyma.11G253200/Glyma.10G182800/Glyma.09G136400/Glyma.01G021200/Glyma.02G135700/Glyma.20G159200/Glyma.07G209300/Glyma.20G207200/Glyma.08G062500/Glyma.13G133200/Glyma.20G234200/Glyma.08G041200/Glyma.03G197300…	132
16 h	03013	RNA transport	117/4207	271/14423	5.20713e-07	9.66212e-06	7.24735e-06	Glyma.13G148200/Glyma.19G188700/Glyma.16G160800/Glyma.10G063700/Glyma.01G224700/Glyma.20G171200/Glyma.06G041700/Glyma.05G114900/Glyma.04G040700/Glyma.04G074200/Glyma.19G052400/Glyma.19G240700/Glyma.15G097500/Glyma.17G053200/Glyma.04G069100/Glyma.01G067900/Glyma.14G051300/Glyma.13G363900/Glyma.15G010000/Glyma.18G133400/Glyma.09G234100/Glyma.02G206900/Glyma.02G266200/Glyma.02G147200/Glyma.17G071100…	117
16 h	03430	Mismatch repair	37/4207	65/14423	2.69622e-06	4.50268e-05	3.37737e-05	Glyma.11G070700/Glyma.07G100600/Glyma.09G189100/Glyma.17G078700/Glyma.05G020600/Glyma.18G067800/Glyma.10G278800/Glyma.20G111700/Glyma.07G087700/Glyma.17G130800/Glyma.17G202200/Glyma.14G133400/Glyma.08G334900/Glyma.08G120900/Glyma.12G206200/Glyma.08G079500/Glyma.05G163700/Glyma.05G014200/Glyma.17G121400/Glyma.05G124300/Glyma.04G248900/Glyma.01G158400/Glyma.01G030600/Glyma.12G096100/Glyma.13G294700…	37
16 h	00010	Glycolysis / Gluconeogenesis	103/4207	243/14423	6.56755e-06	9.97073e-05	7.47884e-05	Glyma.01G118000/Glyma.13G035200/Glyma.14G121200/Glyma.16G173100/Glyma.05G058100/Glyma.06G105600/Glyma.07G241600/Glyma.05G000700/Glyma.06G122600/Glyma.07G269500/Glyma.06G032500/Glyma.08G199800/Glyma.09G126300/Glyma.01G116700/Glyma.06G208200/Glyma.01G019200/Glyma.10G041000/Glyma.18G009700/Glyma.10G201100/Glyma.06G088600/Glyma.19G000700/Glyma.10G178900/Glyma.10G241000/Glyma.16G018300/Glyma.18G257700…	103
16 h	03060	Protein export	46/4207	90/14423	9.53496e-06	0.000132695	9.95316e-05	Glyma.06G227200/Glyma.08G284800/Glyma.08G025700/Glyma.03G034100/Glyma.01G133400/Glyma.03G239600/Glyma.05G219400/Glyma.12G156800/Glyma.08G025900/Glyma.12G171400/Glyma.12G070500/Glyma.14G053200/Glyma.05G146700/Glyma.02G258900/Glyma.12G230900/Glyma.08G103600/Glyma.10G156000/Glyma.13G268600/Glyma.08G336000/Glyma.11G249600/Glyma.19G236500/Glyma.13G327801/Glyma.02G141101/Glyma.05G219600/Glyma.08G101100…	46
16 h	00220	Arginine biosynthesis	31/4207	56/14423	3.64246e-05	0.000467916	0.000350974	Glyma.05G146000/Glyma.05G046900/Glyma.01G204600/Glyma.01G131100/Glyma.16G153400/Glyma.19G111000/Glyma.10G044300/Glyma.07G179700/Glyma.14G213300/Glyma.20G009400/Glyma.06G082400/Glyma.11G047200/Glyma.17G128600/Glyma.04G094600/Glyma.01G194700/Glyma.05G046700/Glyma.06G096700/Glyma.04G073800/Glyma.04G030500/Glyma.17G216000/Glyma.05G066200/Glyma.06G030600/Glyma.05G236000/Glyma.07G104500/Glyma.11G043300…	31
16 h	00190	Oxidative phosphorylation	92/4207	224/14423	8.3359e-05	0.000994354	0.000745844	Glyma.12G040300/Glyma.07G113500/Glyma.11G040300/Glyma.03G262600/Glyma.13G065400/Glyma.15G273900/Glyma.14G010400/Glyma.15G162600/Glyma.19G019200/Glyma.10G128100/Glyma.16G147600/Glyma.07G003700/Glyma.08G222900/Glyma.09G247100/Glyma.07G117000/Glyma.17G160400/Glyma.05G106100/Glyma.16G062100/Glyma.20G123600/Glyma.20G079400/Glyma.19G211200/Glyma.17G157000/Glyma.12G017800/Glyma.20G177700/Glyma.11G011200…	92
16 h	03012	Translation factors	99/4207	247/14423	0.000138527	0.00154227	0.00115682	Glyma.09G275000/Glyma.16G001900/Glyma.05G114900/Glyma.18G107500/Glyma.02G276600/Glyma.13G073200/Glyma.19G052400/Glyma.12G165301/Glyma.01G054000/Glyma.08G167900/Glyma.04G195100/Glyma.17G053200/Glyma.04G080800/Glyma.06G082500/Glyma.09G046000/Glyma.18G133400/Glyma.09G234100/Glyma.03G150600/Glyma.14G039100/Glyma.06G170900/Glyma.05G024200/Glyma.08G170000/Glyma.05G245100/Glyma.03G002400/Glyma.15G218700…	99
16 h	00300	Lysine biosynthesis	14/4207	20/14423	0.000185733	0.00182455	0.00136856	Glyma.16G028900/Glyma.08G063500/Glyma.09G268200/Glyma.05G240700/Glyma.07G060300/Glyma.18G221700/Glyma.08G047800/Glyma.03G181200/Glyma.05G151100/Glyma.07G185700/Glyma.08G107800/Glyma.19G174300/Glyma.19G182000/Glyma.03G173400	14
16 h	02048	Prokaryotic defense system	14/4207	20/14423	0.000185733	0.00182455	0.00136856	Glyma.11G083600/Glyma.01G007800/Glyma.04G187600/Glyma.08G322800/Glyma.20G090100/Glyma.18G089400/Glyma.10G141500/Glyma.03G195200/Glyma.14G017600/Glyma.10G071800/Glyma.19G194800/Glyma.02G295800/Glyma.07G124000/Glyma.16G103500	14
16 h	04141	Protein processing in endoplasmic reticulum	142/4207	379/14423	0.000259713	0.00220993	0.00165762	Glyma.14G063700/Glyma.02G252800/Glyma.02G076600/Glyma.07G200000/Glyma.02G205600/Glyma.04G186000/Glyma.03G232000/Glyma.17G072400/Glyma.04G247900/Glyma.06G180000/Glyma.06G054700/Glyma.07G200200/Glyma.14G063800/Glyma.06G114800/Glyma.06G227200/Glyma.16G050800/Glyma.13G176000/Glyma.08G025700/Glyma.11G146800/Glyma.12G024500/Glyma.03G034100/Glyma.01G133400/Glyma.20G065900/Glyma.13G077300/Glyma.11G098300…	142
16 h	09104	Nucleotide metabolism	95/4207	239/14423	0.000264625	0.00220993	0.00165762	Glyma.05G146000/Glyma.10G121524/Glyma.15G217500/Glyma.19G182400/Glyma.02G293500/Glyma.16G173100/Glyma.14G021000/Glyma.03G089400/Glyma.02G182400/Glyma.05G000700/Glyma.09G126300/Glyma.18G048400/Glyma.04G065800/Glyma.05G048400/Glyma.15G106200/Glyma.10G201100/Glyma.15G073000/Glyma.03G109500/Glyma.14G115700/Glyma.19G000700/Glyma.10G178900/Glyma.10G100800/Glyma.10G241000/Glyma.08G232600/Glyma.01G210800…	95
16 h	03040	Spliceosome	119/4207	310/14423	0.000264663	0.00220993	0.00165762	Glyma.02G205600/Glyma.17G072400/Glyma.12G239000/Glyma.04G208600/Glyma.17G063100/Glyma.20G084000/Glyma.14G025900/Glyma.17G115400/Glyma.15G097500/Glyma.02G288900/Glyma.07G205500/Glyma.14G200400/Glyma.09G283300/Glyma.14G196700/Glyma.05G149300/Glyma.03G152100/Glyma.07G130900/Glyma.19G196100/Glyma.19G082500/Glyma.19G172200/Glyma.20G113200/Glyma.08G291500/Glyma.18G266500/Glyma.05G185800/Glyma.16G063000…	119
16 h	00061	Fatty acid biosynthesis	39/4207	85/14423	0.000780027	0.00620307	0.00465279	Glyma.14G121400/Glyma.13G038600/Glyma.19G028800/Glyma.06G112900/Glyma.13G057400/Glyma.18G265300/Glyma.15G052500/Glyma.08G345900/Glyma.05G129600/Glyma.18G057700/Glyma.11G101400/Glyma.18G156100/Glyma.12G027300/Glyma.07G207200/Glyma.08G179900/Glyma.05G221100/Glyma.11G164500/Glyma.08G084300/Glyma.02G138100/Glyma.08G349200/Glyma.08G024700/Glyma.18G009200/Glyma.08G027600/Glyma.09G277400/Glyma.11G248000…	39
16 h	00020	Citrate cycle (TCA cycle)	42/4207	94/14423	0.000975052	0.00740153	0.00555173	Glyma.08G159900/Glyma.07G241600/Glyma.01G019200/Glyma.16G018300/Glyma.20G114500/Glyma.19G226100/Glyma.10G215400/Glyma.15G143100/Glyma.17G100600/Glyma.05G141000/Glyma.17G032300/Glyma.05G026300/Glyma.02G005500/Glyma.01G081900/Glyma.14G092100/Glyma.12G159300/Glyma.17G231400/Glyma.14G001900/Glyma.08G096300/Glyma.07G049600/Glyma.16G004400/Glyma.15G267000/Glyma.10G006500/Glyma.02G042100/Glyma.20G176300…	42
16 h	00620	Pyruvate metabolism	68/4207	169/14423	0.00126855	0.00870431	0.00652892	Glyma.16G173100/Glyma.19G028800/Glyma.05G058100/Glyma.13G057400/Glyma.18G265300/Glyma.07G241600/Glyma.05G000700/Glyma.06G229900/Glyma.09G126300/Glyma.09G004300/Glyma.01G019200/Glyma.10G201100/Glyma.19G000700/Glyma.10G178900/Glyma.01G146300/Glyma.16G018300/Glyma.05G221100/Glyma.05G227400/Glyma.20G114500/Glyma.18G137300/Glyma.10G215400/Glyma.15G143100/Glyma.04G086300/Glyma.01G091000/Glyma.08G027600…	68
16 h	00333	Prodigiosin biosynthesis	8/4207	10/14423	0.00129084	0.00870431	0.00652892	Glyma.08G345900/Glyma.18G057700/Glyma.11G101400/Glyma.18G156100/Glyma.12G027300/Glyma.11G164500/Glyma.18G009200/Glyma.11G248000	8
16 h	00660	C5-Branched dibasic acid metabolism	10/4207	14/14423	0.00130304	0.00870431	0.00652892	Glyma.05G167700/Glyma.11G079000/Glyma.13G367900/Glyma.14G217300/Glyma.08G126100/Glyma.06G169700/Glyma.08G210500/Glyma.15G005400/Glyma.13G241000/Glyma.17G256102	10
16 h	03440	Homologous recombination	40/4207	90/14423	0.00143976	0.00924767	0.00693648	Glyma.02G261800/Glyma.15G092000/Glyma.17G078700/Glyma.05G020600/Glyma.10G278800/Glyma.20G111700/Glyma.10G014100/Glyma.13G220400/Glyma.13G010700/Glyma.17G202200/Glyma.14G133400/Glyma.U027200/Glyma.12G206200/Glyma.08G079500/Glyma.05G014200/Glyma.05G124300/Glyma.17G045000/Glyma.01G030600/Glyma.13G363400/Glyma.08G188100/Glyma.09G070600/Glyma.13G115000/Glyma.04G181200/Glyma.01G244700/Glyma.13G294700/G…	40
16 h	03110	Chaperones and folding catalysts	174/4207	494/14423	0.00176648	0.0106857	0.00801513	Glyma.14G063700/Glyma.02G252800/Glyma.02G076600/Glyma.15G077700/Glyma.03G057500/Glyma.07G200000/Glyma.02G205600/Glyma.10G195200/Glyma.03G232000/Glyma.17G072400/Glyma.02G187800/Glyma.04G247900/Glyma.16G052800/Glyma.20G240000/Glyma.06G054700/Glyma.07G200200/Glyma.14G063800/Glyma.06G114800/Glyma.13G176000/Glyma.08G025700/Glyma.11G146800/Glyma.20G065900/Glyma.13G077300/Glyma.01G238600/Glyma.04G202900…	174
16 h	00230	Purine metabolism	67/4207	168/14423	0.00179162	0.0106857	0.00801513	Glyma.05G146000/Glyma.10G121524/Glyma.19G182400/Glyma.16G173100/Glyma.02G182400/Glyma.05G000700/Glyma.09G126300/Glyma.04G065800/Glyma.15G106200/Glyma.10G201100/Glyma.15G073000/Glyma.03G109500/Glyma.14G115700/Glyma.19G000700/Glyma.10G178900/Glyma.10G100800/Glyma.10G241000/Glyma.01G210800/Glyma.05G045200/Glyma.19G091400/Glyma.07G115900/Glyma.11G047900/Glyma.10G156900/Glyma.20G211200/Glyma.06G148500…	67
16 h	03400	DNA repair and recombination proteins	159/4207	448/14423	0.00191494	0.010954	0.00821633	Glyma.11G070700/Glyma.07G100600/Glyma.02G261800/Glyma.18G048400/Glyma.03G129500/Glyma.15G092000/Glyma.03G161300/Glyma.09G189100/Glyma.17G078700/Glyma.05G020600/Glyma.03G211900/Glyma.18G067800/Glyma.08G102300/Glyma.10G029000/Glyma.10G278800/Glyma.19G243600/Glyma.20G111700/Glyma.19G091400/Glyma.10G014100/Glyma.10G243200/Glyma.07G087700/Glyma.03G246100/Glyma.17G130800/Glyma.13G220400/Glyma.12G104000…	159
16 h	00196	Photosynthesis - antenna proteins	18/4207	33/14423	0.00196778	0.010954	0.00821633	Glyma.02G305400/Glyma.16G165500/Glyma.12G219300/Glyma.16G165200/Glyma.13G282000/Glyma.05G128000/Glyma.16G145800/Glyma.08G082900/Glyma.08G074000/Glyma.16G165800/Glyma.15G052400/Glyma.14G008000/Glyma.20G212900/Glyma.01G115900/Glyma.03G060300/Glyma.09G154700/Glyma.08G180000/Glyma.02G309500	18
16 h	02044	Secretion system	35/4207	79/14423	0.00295418	0.0157511	0.0118146	Glyma.13G191200/Glyma.06G227200/Glyma.08G284800/Glyma.05G048400/Glyma.03G034100/Glyma.01G133400/Glyma.09G171600/Glyma.12G156800/Glyma.12G171400/Glyma.07G106600/Glyma.12G070500/Glyma.14G053200/Glyma.02G258900/Glyma.12G230900/Glyma.13G268600/Glyma.08G336000/Glyma.13G327801/Glyma.02G141101/Glyma.08G101100/Glyma.09G232500/Glyma.05G144700/Glyma.10G032800/Glyma.18G071100/Glyma.08G008000/Glyma.15G006700…	35
16 h	03420	Nucleotide excision repair	46/4207	110/14423	0.00301818	0.0157511	0.0118146	Glyma.11G070700/Glyma.17G078700/Glyma.05G020600/Glyma.18G067800/Glyma.10G278800/Glyma.20G111700/Glyma.17G130800/Glyma.17G202200/Glyma.14G133400/Glyma.08G334900/Glyma.12G206200/Glyma.08G079500/Glyma.05G124300/Glyma.18G297400/Glyma.04G248900/Glyma.13G371600/Glyma.01G030600/Glyma.08G223800/Glyma.11G183100/Glyma.19G036900/Glyma.12G096100/Glyma.06G046400/Glyma.05G140800/Glyma.13G294700/Glyma.09G213500…	46
16 h	09121	Transcription	162/4207	465/14423	0.00408114	0.020653	0.0154914	Glyma.02G205600/Glyma.17G072400/Glyma.17G201200/Glyma.17G050400/Glyma.03G129500/Glyma.12G239000/Glyma.04G208600/Glyma.18G281100/Glyma.17G063100/Glyma.20G084000/Glyma.14G025900/Glyma.09G016100/Glyma.17G115400/Glyma.03G178900/Glyma.15G097500/Glyma.02G288900/Glyma.18G212300/Glyma.07G205500/Glyma.07G220900/Glyma.01G029400/Glyma.14G200400/Glyma.09G283300/Glyma.14G196700/Glyma.02G035900/Glyma.05G149300…	162
16 h	04145	Phagosome	62/4207	160/14423	0.00558379	0.0274262	0.0205718	Glyma.12G040300/Glyma.20G159200/Glyma.09G192700/Glyma.12G120600/Glyma.06G227200/Glyma.07G084200/Glyma.07G004500/Glyma.03G034100/Glyma.01G133400/Glyma.04G088500/Glyma.04G202900/Glyma.08G006500/Glyma.06G162600/Glyma.12G156800/Glyma.12G171400/Glyma.16G124400/Glyma.05G199200/Glyma.10G147600/Glyma.12G070500/Glyma.01G109300/Glyma.14G053200/Glyma.20G098400/Glyma.02G258900/Glyma.12G230900/Glyma.05G110200…	62
16 h	00250	Alanine, aspartate and glutamate metabolism	39/4207	94/14423	0.0070102	0.0332366	0.0249301	Glyma.05G046900/Glyma.01G204600/Glyma.01G131100/Glyma.02G293500/Glyma.14G021000/Glyma.16G153400/Glyma.19G111000/Glyma.05G182600/Glyma.17G238200/Glyma.11G240200/Glyma.14G162300/Glyma.14G213300/Glyma.13G328600/Glyma.06G082400/Glyma.15G263500/Glyma.02G241400/Glyma.17G128600/Glyma.08G163700/Glyma.04G216000/Glyma.04G094600/Glyma.05G046700/Glyma.06G096700/Glyma.18G017200/Glyma.17G216000/Glyma.05G066200…	39
16 h	00780	Biotin metabolism	14/4207	26/14423	0.00716477	0.0332366	0.0249301	Glyma.15G052500/Glyma.08G345900/Glyma.05G129600/Glyma.11G101400/Glyma.18G156100/Glyma.12G027300/Glyma.08G179900/Glyma.08G084300/Glyma.08G024700/Glyma.18G009200/Glyma.11G248000/Glyma.13G128000/Glyma.12G020600/Glyma.17G047000	14
16 h	03020	RNA polymerase	30/4207	69/14423	0.00783931	0.0353828	0.0265399	Glyma.17G201200/Glyma.17G050400/Glyma.03G129500/Glyma.18G281100/Glyma.09G016100/Glyma.03G178900/Glyma.07G220900/Glyma.01G029400/Glyma.02G035900/Glyma.18G179600/Glyma.10G238600/Glyma.18G075300/Glyma.09G228500/Glyma.09G037400/Glyma.07G084000/Glyma.15G077800/Glyma.16G212700/Glyma.06G096400/Glyma.03G218500/Glyma.15G121800/Glyma.03G088500/Glyma.19G045500/Glyma.09G164200/Glyma.10G095200/Glyma.07G241200…	30
16 h	03018	RNA degradation	70/4207	188/14423	0.0100272	0.0440669	0.0330536	Glyma.13G148200/Glyma.19G188700/Glyma.02G293100/Glyma.07G269500/Glyma.08G199800/Glyma.06G208200/Glyma.16G160800/Glyma.10G063700/Glyma.06G088600/Glyma.12G239000/Glyma.20G171200/Glyma.06G041700/Glyma.02G112000/Glyma.04G086900/Glyma.04G040700/Glyma.08G192700/Glyma.16G204600/Glyma.17G052100/Glyma.09G261100/Glyma.18G092700/Glyma.10G193200/Glyma.03G190500/Glyma.17G102000/Glyma.19G190900/Glyma.07G009600…	70
16 h	04091	Lectins	12/4207	22/14423	0.0110401	0.0472745	0.0354596	Glyma.19G255000/Glyma.04G202900/Glyma.08G006500/Glyma.06G162600/Glyma.05G199200/Glyma.10G147600/Glyma.20G098400/Glyma.11G126100/Glyma.16G026200/Glyma.03G256800/Glyma.07G057200/Glyma.07G224600	12
20 h	03009	Ribosome biogenesis	269/4425	469/14423	5.01107e-34	8.36848e-32	6.43527e-32	Glyma.02G205600/Glyma.14G013102/Glyma.08G081400/Glyma.17G072400/Glyma.15G056100/Glyma.19G110900/Glyma.18G020000/Glyma.16G041400/Glyma.10G022600/Glyma.08G176900/Glyma.06G071900/Glyma.09G023100/Glyma.11G152600/Glyma.04G200700/Glyma.08G173300/Glyma.11G114300/Glyma.15G254100/Glyma.02G151500/Glyma.11G101500/Glyma.17G029800/Glyma.07G032500/Glyma.12G028500/Glyma.12G095400/Glyma.03G001200/Glyma.10G200300…	269
20 h	03008	Ribosome biogenesis in eukaryotes	93/4425	147/14423	2.86878e-16	2.39543e-14	1.84206e-14	Glyma.15G056100/Glyma.19G110900/Glyma.18G020000/Glyma.16G041400/Glyma.10G022600/Glyma.08G176900/Glyma.11G152600/Glyma.04G200700/Glyma.11G114300/Glyma.02G151500/Glyma.17G029800/Glyma.07G032500/Glyma.12G095400/Glyma.17G128400/Glyma.05G046400/Glyma.17G115400/Glyma.14G089042/Glyma.07G261900/Glyma.08G013300/Glyma.19G165900/Glyma.11G175746/Glyma.12G040200/Glyma.17G233900/Glyma.11G237200/Glyma.14G196700…	93
20 h	03012	Translation factors	133/4425	247/14423	2.08852e-14	1.16261e-12	8.94035e-13	Glyma.16G001900/Glyma.09G275000/Glyma.05G114900/Glyma.01G054000/Glyma.06G082500/Glyma.13G073200/Glyma.04G080800/Glyma.18G107500/Glyma.08G167900/Glyma.09G046000/Glyma.02G276600/Glyma.12G165301/Glyma.17G053200/Glyma.05G041900/Glyma.08G170000/Glyma.19G052400/Glyma.15G257100/Glyma.15G075100/Glyma.09G089600/Glyma.05G245100/Glyma.03G002400/Glyma.08G275900/Glyma.06G170900/Glyma.03G106500/Glyma.14G039100…	133
20 h	03051	03051	91/4425	164/14423	3.08276e-11	1.28705e-09	9.89728e-10	Glyma.02G205600/Glyma.17G072400/Glyma.06G236100/Glyma.08G013300/Glyma.18G297400/Glyma.01G055500/Glyma.10G295600/Glyma.07G155700/Glyma.07G170800/Glyma.05G206400/Glyma.05G079000/Glyma.08G286200/Glyma.04G078200/Glyma.11G199900/Glyma.14G011600/Glyma.18G206200/Glyma.17G127100/Glyma.03G170600/Glyma.04G249300/Glyma.18G050900/Glyma.18G029800/Glyma.02G302500/Glyma.08G223800/Glyma.17G252100/Glyma.20G245500…	91
20 h	03013	RNA transport	130/4425	271/14423	1.37024e-09	4.28624e-08	3.29607e-08	Glyma.16G160800/Glyma.13G148200/Glyma.19G188700/Glyma.01G224700/Glyma.05G114900/Glyma.20G171200/Glyma.02G206900/Glyma.02G266200/Glyma.17G053200/Glyma.06G041700/Glyma.15G010000/Glyma.19G052400/Glyma.13G363900/Glyma.15G075100/Glyma.04G074200/Glyma.14G051300/Glyma.05G245100/Glyma.19G240700/Glyma.03G002400/Glyma.04G040700/Glyma.15G097500/Glyma.03G106500/Glyma.17G071100/Glyma.16G068000/Glyma.18G133400…	130
20 h	03050	Proteasome	62/4425	105/14423	1.53997e-09	4.28624e-08	3.29607e-08	Glyma.10G295600/Glyma.07G155700/Glyma.05G079000/Glyma.08G286200/Glyma.04G078200/Glyma.11G199900/Glyma.18G206200/Glyma.17G127100/Glyma.03G170600/Glyma.04G249300/Glyma.18G050900/Glyma.18G029800/Glyma.17G252100/Glyma.20G245500/Glyma.10G043000/Glyma.03G262800/Glyma.12G147200/Glyma.13G031200/Glyma.09G161300/Glyma.08G048800/Glyma.14G073000/Glyma.10G279900/Glyma.04G077400/Glyma.14G071000/Glyma.06G021600…	62
20 h	00196	Photosynthesis - antenna proteins	27/4425	33/14423	1.80949e-09	4.31692e-08	3.31966e-08	Glyma.02G305400/Glyma.16G165200/Glyma.16G165500/Glyma.05G128000/Glyma.12G219300/Glyma.13G282000/Glyma.14G008000/Glyma.20G212900/Glyma.16G145800/Glyma.09G154700/Glyma.08G074000/Glyma.08G082900/Glyma.01G115900/Glyma.16G165800/Glyma.03G060300/Glyma.10G177200/Glyma.16G016100/Glyma.02G309500/Glyma.15G052400/Glyma.03G262300/Glyma.08G180000/Glyma.07G047600/Glyma.18G028400/Glyma.16G205200/Glyma.02G064700…	27
20 h	03032	DNA replication proteins	107/4425	221/14423	2.07678e-08	4.33529e-07	3.33378e-07	Glyma.11G184100/Glyma.12G088300/Glyma.11G070700/Glyma.18G157402/Glyma.06G116100/Glyma.13G031500/Glyma.13G024401/Glyma.04G246600/Glyma.03G161300/Glyma.14G154200/Glyma.10G035700/Glyma.15G056100/Glyma.08G310900/Glyma.19G110900/Glyma.13G122100/Glyma.18G067800/Glyma.17G078700/Glyma.04G133700/Glyma.15G276000/Glyma.16G041400/Glyma.03G219200/Glyma.05G020600/Glyma.19G216100/Glyma.09G047300/Glyma.07G238400…	107
20 h	03030	DNA replication	48/4425	87/14423	1.71473e-06	3.18178e-05	2.44675e-05	Glyma.11G070700/Glyma.18G157402/Glyma.18G067800/Glyma.17G078700/Glyma.03G219200/Glyma.05G020600/Glyma.19G216100/Glyma.09G047300/Glyma.07G238400/Glyma.17G035000/Glyma.11G113300/Glyma.18G009300/Glyma.05G129700/Glyma.17G104000/Glyma.04G248900/Glyma.14G133400/Glyma.17G202200/Glyma.15G154900/Glyma.02G286600/Glyma.06G310500/Glyma.08G334900/Glyma.09G213500/Glyma.13G156400/Glyma.08G105600/Glyma.12G039200…	48
20 h	03040	Spliceosome	133/4425	310/14423	2.94195e-06	4.91305e-05	3.77808e-05	Glyma.02G205600/Glyma.17G072400/Glyma.12G239000/Glyma.07G205500/Glyma.04G208600/Glyma.17G115400/Glyma.15G097500/Glyma.20G084000/Glyma.14G025900/Glyma.14G196700/Glyma.19G114900/Glyma.07G170800/Glyma.18G266500/Glyma.17G063100/Glyma.15G216300/Glyma.19G082500/Glyma.20G075100/Glyma.02G232800/Glyma.07G252700/Glyma.03G152100/Glyma.10G192200/Glyma.16G037700/Glyma.05G127900/Glyma.09G283300/Glyma.05G149300…	133
20 h	00230	Purine metabolism	78/4425	168/14423	1.18383e-05	0.000179727	0.000138208	Glyma.05G146000/Glyma.10G121524/Glyma.19G182400/Glyma.16G173100/Glyma.02G182400/Glyma.04G065800/Glyma.11G047900/Glyma.05G000700/Glyma.14G115700/Glyma.09G126300/Glyma.03G189700/Glyma.19G000700/Glyma.15G073000/Glyma.10G178900/Glyma.03G109500/Glyma.15G106200/Glyma.18G036300/Glyma.07G258900/Glyma.10G156900/Glyma.10G241000/Glyma.10G201100/Glyma.05G045200/Glyma.08G164100/Glyma.07G115900/Glyma.09G222700…	78
20 h	09124	Replication and repair	105/4425	241/14423	1.42366e-05	0.000198126	0.000152356	Glyma.11G184100/Glyma.12G088300/Glyma.11G070700/Glyma.18G157402/Glyma.03G161300/Glyma.02G261800/Glyma.08G232900/Glyma.18G067800/Glyma.17G078700/Glyma.15G217300/Glyma.15G092000/Glyma.03G219200/Glyma.05G020600/Glyma.07G087700/Glyma.19G216100/Glyma.09G047300/Glyma.07G238400/Glyma.17G035000/Glyma.11G113300/Glyma.U032008/Glyma.18G009300/Glyma.05G129700/Glyma.17G104000/Glyma.04G248900/Glyma.14G133400/G…	105
20 h	09104	Nucleotide metabolism	104/4425	239/14423	1.66319e-05	0.000213655	0.000164299	Glyma.05G146000/Glyma.10G121524/Glyma.02G293500/Glyma.14G021000/Glyma.15G217500/Glyma.03G089400/Glyma.19G182400/Glyma.16G173100/Glyma.08G232600/Glyma.02G182400/Glyma.04G065800/Glyma.11G047900/Glyma.05G000700/Glyma.14G115700/Glyma.09G126300/Glyma.03G189700/Glyma.19G000700/Glyma.15G073000/Glyma.10G178900/Glyma.03G109500/Glyma.15G106200/Glyma.13G328600/Glyma.11G115200/Glyma.18G036300/Glyma.07G258900…	104
20 h	00860	Porphyrin and chlorophyll metabolism	40/4425	74/14423	2.35446e-05	0.000280854	0.000215973	Glyma.06G247100/Glyma.03G137000/Glyma.12G222200/Glyma.14G185700/Glyma.08G007900/Glyma.17G100700/Glyma.20G090100/Glyma.02G273800/Glyma.14G010400/Glyma.10G141500/Glyma.04G002900/Glyma.03G119500/Glyma.13G215400/Glyma.05G200500/Glyma.05G026200/Glyma.11G192300/Glyma.15G097700/Glyma.13G078400/Glyma.10G097800/Glyma.13G232500/Glyma.12G021100/Glyma.03G007300/Glyma.15G080200/Glyma.04G037000/Glyma.12G082100…	40
20 h	00010	Glycolysis / Gluconeogenesis	103/4425	243/14423	6.64572e-05	0.00073989	0.000568967	Glyma.13G035200/Glyma.14G121200/Glyma.01G118000/Glyma.01G116700/Glyma.16G173100/Glyma.07G269500/Glyma.08G200600/Glyma.01G019200/Glyma.10G041000/Glyma.05G058100/Glyma.05G000700/Glyma.08G199800/Glyma.16G204600/Glyma.07G241600/Glyma.09G126300/Glyma.18G257700/Glyma.06G122600/Glyma.03G189700/Glyma.18G200300/Glyma.16G018300/Glyma.19G000700/Glyma.06G105600/Glyma.06G208200/Glyma.15G143100/Glyma.10G178900…	103
20 h	00970	Aminoacyl-tRNA biosynthesis	41/4425	80/14423	9.48545e-05	0.000979995	0.000753605	Glyma.13G000200/Glyma.20G090100/Glyma.11G034100/Glyma.10G141500/Glyma.01G208100/Glyma.08G363700/Glyma.01G032500/Glyma.10G239500/Glyma.05G234900/Glyma.10G155000/Glyma.12G020700/Glyma.13G152678/Glyma.03G224500/Glyma.12G043200/Glyma.11G117800/Glyma.10G289600/Glyma.08G031100/Glyma.20G233300/Glyma.05G224000/Glyma.17G223600/Glyma.14G101500/Glyma.19G221400/Glyma.01G006400/Glyma.10G272800/Glyma.11G094300…	41
20 h	00194	Photosynthesis proteins	65/4425	142/14423	0.000103388	0.000979995	0.000753605	Glyma.02G305400/Glyma.12G169500/Glyma.16G165200/Glyma.16G165500/Glyma.13G357300/Glyma.05G128000/Glyma.12G092000/Glyma.12G219300/Glyma.13G282000/Glyma.14G008000/Glyma.20G212900/Glyma.16G145800/Glyma.09G154700/Glyma.08G074000/Glyma.05G022900/Glyma.11G181100/Glyma.08G082900/Glyma.01G115900/Glyma.02G282500/Glyma.11G183300/Glyma.17G154900/Glyma.16G165800/Glyma.12G169600/Glyma.02G141700/Glyma.20G110800…	65
20 h	00220	Arginine biosynthesis	31/4425	56/14423	0.000105628	0.000979995	0.000753605	Glyma.05G146000/Glyma.01G204600/Glyma.19G111000/Glyma.05G046900/Glyma.16G153400/Glyma.01G131100/Glyma.04G073800/Glyma.14G213300/Glyma.11G047200/Glyma.07G179700/Glyma.10G044300/Glyma.05G046700/Glyma.17G128600/Glyma.07G104500/Glyma.01G194700/Glyma.06G096700/Glyma.04G030500/Glyma.20G009400/Glyma.05G236000/Glyma.11G043300/Glyma.06G082400/Glyma.06G030600/Glyma.04G094600/Glyma.17G216000/Glyma.20G000500…	31
20 h	04141	Protein processing in endoplasmic reticulum	150/4425	379/14423	0.000119102	0.00104684	0.000805008	Glyma.02G076600/Glyma.02G252800/Glyma.14G063700/Glyma.04G186000/Glyma.02G205600/Glyma.06G180000/Glyma.08G212000/Glyma.17G072400/Glyma.18G094600/Glyma.04G247900/Glyma.07G200000/Glyma.03G232000/Glyma.06G114800/Glyma.06G227200/Glyma.20G065900/Glyma.11G146800/Glyma.13G077300/Glyma.16G050800/Glyma.08G025700/Glyma.13G176000/Glyma.14G063800/Glyma.12G151200/Glyma.12G024500/Glyma.04G202900/Glyma.02G266900…	150
20 h	00061	Fatty acid biosynthesis	42/4425	85/14423	0.000224343	0.00187326	0.00144052	Glyma.14G121400/Glyma.13G038600/Glyma.06G112900/Glyma.19G028800/Glyma.18G265300/Glyma.13G057400/Glyma.08G345900/Glyma.05G129600/Glyma.18G156100/Glyma.15G052500/Glyma.11G101400/Glyma.12G027300/Glyma.07G207200/Glyma.18G057700/Glyma.02G138100/Glyma.05G221100/Glyma.08G084300/Glyma.11G164500/Glyma.13G079900/Glyma.08G349200/Glyma.18G243500/Glyma.09G277400/Glyma.18G009200/Glyma.08G179900/Glyma.08G027600…	42
20 h	00660	C5-Branched dibasic acid metabolism	11/4425	14/14423	0.000305357	0.00242832	0.00186735	Glyma.05G167700/Glyma.14G217300/Glyma.06G169700/Glyma.13G367900/Glyma.13G241000/Glyma.08G126100/Glyma.17G256102/Glyma.08G210500/Glyma.15G005400/Glyma.11G079000/Glyma.15G072500	11
20 h	00300	Lysine biosynthesis	14/4425	20/14423	0.000335863	0.00243866	0.0018753	Glyma.09G268200/Glyma.08G063500/Glyma.16G028900/Glyma.18G221700/Glyma.07G060300/Glyma.05G240700/Glyma.05G151100/Glyma.03G181200/Glyma.07G185700/Glyma.08G047800/Glyma.08G107800/Glyma.19G174300/Glyma.03G173400/Glyma.19G182000	14
20 h	02048	Prokaryotic defense system	14/4425	20/14423	0.000335863	0.00243866	0.0018753	Glyma.20G090100/Glyma.18G089400/Glyma.11G083600/Glyma.10G141500/Glyma.01G007800/Glyma.04G187600/Glyma.08G322800/Glyma.14G017600/Glyma.03G195200/Glyma.02G295800/Glyma.10G071800/Glyma.19G194800/Glyma.07G124000/Glyma.03G097900	14
20 h	03060	Protein export	43/4425	90/14423	0.000480394	0.00334274	0.00257053	Glyma.06G227200/Glyma.08G025700/Glyma.08G025900/Glyma.08G284800/Glyma.05G219400/Glyma.12G156800/Glyma.12G070500/Glyma.01G133400/Glyma.03G239600/Glyma.12G171400/Glyma.13G327801/Glyma.03G034100/Glyma.08G336000/Glyma.08G101100/Glyma.12G230900/Glyma.05G144700/Glyma.13G268600/Glyma.08G103600/Glyma.10G156000/Glyma.14G053200/Glyma.05G146700/Glyma.05G200600/Glyma.02G258900/Glyma.19G236500/Glyma.11G155259…	43
20 h	01007	Amino acid related enzymes	62/4425	141/14423	0.000564668	0.00377198	0.00290061	Glyma.07G186000/Glyma.07G186100/Glyma.01G131100/Glyma.18G210500/Glyma.08G063500/Glyma.05G182600/Glyma.13G000200/Glyma.11G045300/Glyma.20G090100/Glyma.11G034100/Glyma.06G235500/Glyma.10G141500/Glyma.01G208100/Glyma.06G082400/Glyma.04G002900/Glyma.08G363700/Glyma.01G032500/Glyma.17G216000/Glyma.10G239500/Glyma.05G234900/Glyma.16G203600/Glyma.10G155000/Glyma.12G020700/Glyma.13G152678/Glyma.03G224500…	62
20 h	00333	Prodigiosin biosynthesis	8/4425	10/14423	0.00186526	0.01172	0.00901255	Glyma.08G345900/Glyma.18G156100/Glyma.11G101400/Glyma.12G027300/Glyma.18G057700/Glyma.11G164500/Glyma.18G009200/Glyma.11G248000	8
20 h	00620	Pyruvate metabolism	70/4425	169/14423	0.00189485	0.01172	0.00901255	Glyma.16G173100/Glyma.19G028800/Glyma.01G019200/Glyma.06G229900/Glyma.18G265300/Glyma.13G057400/Glyma.05G058100/Glyma.09G004300/Glyma.05G000700/Glyma.05G227400/Glyma.07G241600/Glyma.09G126300/Glyma.03G189700/Glyma.16G018300/Glyma.19G000700/Glyma.01G091000/Glyma.15G143100/Glyma.10G178900/Glyma.01G146300/Glyma.18G137300/Glyma.10G215400/Glyma.05G221100/Glyma.20G114500/Glyma.10G201100/Glyma.18G243500…	70
20 h	03110	Chaperones and folding catalysts	181/4425	494/14423	0.00229288	0.0136754	0.0105162	Glyma.02G076600/Glyma.02G252800/Glyma.14G063700/Glyma.02G205600/Glyma.15G077700/Glyma.16G052800/Glyma.02G187800/Glyma.08G212000/Glyma.17G072400/Glyma.12G136400/Glyma.10G195200/Glyma.20G240000/Glyma.18G094600/Glyma.04G247900/Glyma.07G200000/Glyma.03G232000/Glyma.06G114800/Glyma.20G065900/Glyma.11G146800/Glyma.13G077300/Glyma.08G025700/Glyma.13G176000/Glyma.14G063800/Glyma.04G202900/Glyma.02G266900…	181
20 h	00290	Valine, leucine and isoleucine biosynthesis	20/4425	37/14423	0.00256672	0.0147808	0.0113662	Glyma.07G186000/Glyma.07G186100/Glyma.05G167700/Glyma.13G291300/Glyma.20G245300/Glyma.11G045300/Glyma.14G217300/Glyma.06G169700/Glyma.12G122900/Glyma.13G367900/Glyma.13G241000/Glyma.08G126100/Glyma.17G256102/Glyma.08G210500/Glyma.15G005400/Glyma.11G079000/Glyma.15G072500/Glyma.13G207900/Glyma.10G295400/Glyma.12G210000	20
20 h	00250	Alanine, aspartate and glutamate metabolism	42/4425	94/14423	0.00285482	0.0158918	0.0122206	Glyma.04G042100/Glyma.06G043000/Glyma.01G204600/Glyma.02G293500/Glyma.19G111000/Glyma.14G021000/Glyma.05G046900/Glyma.16G153400/Glyma.01G131100/Glyma.18G210500/Glyma.14G213300/Glyma.13G328600/Glyma.11G240200/Glyma.05G182600/Glyma.15G263500/Glyma.09G222700/Glyma.18G017200/Glyma.05G046700/Glyma.03G139200/Glyma.17G128600/Glyma.08G163700/Glyma.07G104500/Glyma.12G036200/Glyma.15G045100/Glyma.06G096700…	42
20 h	04812	Cytoskeleton proteins	118/4425	311/14423	0.00344601	0.018564	0.0142755	Glyma.05G149700/Glyma.08G041200/Glyma.12G191000/Glyma.15G150100/Glyma.10G154200/Glyma.20G207200/Glyma.15G063200/Glyma.11G052200/Glyma.10G182800/Glyma.09G136400/Glyma.11G253200/Glyma.19G195300/Glyma.20G159200/Glyma.18G082000/Glyma.13G133200/Glyma.01G190000/Glyma.08G062500/Glyma.20G234200/Glyma.02G296800/Glyma.20G234100/Glyma.08G106400/Glyma.19G235400/Glyma.18G180900/Glyma.13G310700/Glyma.17G123400…	118
20 h	03420	Nucleotide excision repair	47/4425	110/14423	0.00488138	0.0254747	0.0195898	Glyma.11G070700/Glyma.18G157402/Glyma.18G067800/Glyma.17G078700/Glyma.05G020600/Glyma.U032008/Glyma.04G248900/Glyma.14G133400/Glyma.17G202200/Glyma.08G334900/Glyma.09G213500/Glyma.18G297400/Glyma.10G278800/Glyma.08G313400/Glyma.14G025300/Glyma.08G223800/Glyma.12G096100/Glyma.06G155300/Glyma.08G079500/Glyma.12G206200/Glyma.05G140800/Glyma.08G047000/Glyma.20G114700/Glyma.13G371600/Glyma.07G002800/G…	47
20 h	04091	Lectins	13/4425	22/14423	0.00533039	0.026975	0.0207435	Glyma.04G202900/Glyma.19G255000/Glyma.08G006500/Glyma.05G199200/Glyma.06G162600/Glyma.10G147600/Glyma.20G098400/Glyma.16G026200/Glyma.03G256800/Glyma.07G057200/Glyma.11G126100/Glyma.07G224600/Glyma.15G198100	13
20 h	03430	Mismatch repair	30/4425	65/14423	0.00613197	0.0301188	0.023161	Glyma.11G070700/Glyma.18G067800/Glyma.17G078700/Glyma.05G020600/Glyma.07G087700/Glyma.04G248900/Glyma.14G133400/Glyma.17G121400/Glyma.17G202200/Glyma.08G334900/Glyma.09G189100/Glyma.09G213500/Glyma.05G163700/Glyma.01G158400/Glyma.10G278800/Glyma.08G120900/Glyma.12G096100/Glyma.06G155300/Glyma.05G014200/Glyma.08G079500/Glyma.12G206200/Glyma.06G114100/Glyma.01G030600/Glyma.05G089100/Glyma.13G294700…	30
20 h	02044	Secretion system	35/4425	79/14423	0.00719875	0.0338319	0.0260163	Glyma.06G227200/Glyma.09G171600/Glyma.13G191200/Glyma.08G284800/Glyma.07G106600/Glyma.12G156800/Glyma.12G070500/Glyma.01G133400/Glyma.12G171400/Glyma.13G327801/Glyma.03G034100/Glyma.05G048400/Glyma.08G336000/Glyma.08G101100/Glyma.12G230900/Glyma.05G144700/Glyma.13G268600/Glyma.14G053200/Glyma.05G200600/Glyma.02G258900/Glyma.11G155259/Glyma.18G071100/Glyma.08G008000/Glyma.02G036200/Glyma.15G183400…	35
20 h	00603	Glycosphingolipid biosynthesis - globo and isoglobo series	11/4425	18/14423	0.00729311	0.0338319	0.0260163	Glyma.12G088100/Glyma.10G174500/Glyma.09G273400/Glyma.20G240000/Glyma.20G216000/Glyma.18G215700/Glyma.13G241600/Glyma.08G159500/Glyma.10G290900/Glyma.18G286200/Glyma.06G144100	11
20 h	09121	Transcription	167/4425	465/14423	0.00799125	0.0360686	0.0277363	Glyma.02G205600/Glyma.17G072400/Glyma.03G129500/Glyma.17G050400/Glyma.12G239000/Glyma.07G205500/Glyma.04G208600/Glyma.17G115400/Glyma.18G281100/Glyma.15G097500/Glyma.20G084000/Glyma.09G016100/Glyma.14G025900/Glyma.14G196700/Glyma.19G114900/Glyma.07G170800/Glyma.18G266500/Glyma.17G063100/Glyma.18G212300/Glyma.15G216300/Glyma.07G220900/Glyma.19G082500/Glyma.20G075100/Glyma.18G179600/Glyma.02G232800…	167
20 h	03016	Transfer RNA biogenesis	111/4425	299/14423	0.00948335	0.0414246	0.031855	Glyma.02G107900/Glyma.05G114900/Glyma.13G000200/Glyma.02G266200/Glyma.20G090100/Glyma.06G142400/Glyma.11G034100/Glyma.19G052400/Glyma.08G075600/Glyma.14G051300/Glyma.10G141500/Glyma.19G240700/Glyma.01G208100/Glyma.05G121000/Glyma.08G363700/Glyma.16G068000/Glyma.01G032500/Glyma.10G239500/Glyma.19G033700/Glyma.05G234900/Glyma.10G155000/Glyma.17G108000/Glyma.12G020700/Glyma.08G038200/Glyma.08G090700…	111
20 h	00020	Citrate cycle (TCA cycle)	40/4425	94/14423	0.009674	0.0414246	0.031855	Glyma.01G019200/Glyma.07G241600/Glyma.16G018300/Glyma.15G143100/Glyma.10G215400/Glyma.08G159900/Glyma.20G114500/Glyma.19G226100/Glyma.17G100600/Glyma.05G141000/Glyma.05G026300/Glyma.09G203500/Glyma.02G005500/Glyma.07G049600/Glyma.17G032300/Glyma.17G231400/Glyma.14G092100/Glyma.08G096300/Glyma.14G001900/Glyma.02G292500/Glyma.12G159300/Glyma.02G094300/Glyma.18G287400/Glyma.03G228900/Glyma.16G004400…	40
20 h	00780	Biotin metabolism	14/4425	26/14423	0.0115895	0.0483863	0.0372085	Glyma.08G345900/Glyma.05G129600/Glyma.18G156100/Glyma.15G052500/Glyma.11G101400/Glyma.12G027300/Glyma.08G084300/Glyma.18G009200/Glyma.08G179900/Glyma.11G248000/Glyma.13G128000/Glyma.12G020600/Glyma.17G047000/Glyma.13G112700	14

## Sheet: OG10-Up
Cluster	ID	Description	GeneRatio	BgRatio	pvalue	p.adjust	qvalue	geneID	Count
0 h	03009	Ribosome biogenesis	268/4205	469/14423	9.50793e-38	1.58782e-35	1.27106e-35	Glyma.02G205600/Glyma.14G013102/Glyma.08G081400/Glyma.08G197900/Glyma.17G072400/Glyma.06G071900/Glyma.19G110900/Glyma.04G200700/Glyma.16G041400/Glyma.15G056100/Glyma.12G028500/Glyma.13G107200/Glyma.18G020000/Glyma.08G058500/Glyma.19G165900/Glyma.18G024200/Glyma.11G103700/Glyma.16G071100/Glyma.10G006200/Glyma.07G032500/Glyma.04G069900/Glyma.14G196700/Glyma.10G022600/Glyma.10G200300/Glyma.08G176900…	268		Up-regulated' means that gene expressions were increased in seeds, compared to pod walls
0 h	03008	Ribosome biogenesis in eukaryotes	88/4205	147/14423	7.53963e-15	5.20359e-13	4.1655e-13	Glyma.19G110900/Glyma.04G200700/Glyma.16G041400/Glyma.15G056100/Glyma.18G020000/Glyma.19G165900/Glyma.16G071100/Glyma.07G032500/Glyma.14G196700/Glyma.10G022600/Glyma.08G176900/Glyma.17G115400/Glyma.17G029800/Glyma.17G128400/Glyma.20G161600/Glyma.05G046400/Glyma.11G152600/Glyma.11G237200/Glyma.11G142700/Glyma.02G151500/Glyma.11G114300/Glyma.12G040200/Glyma.06G164800/Glyma.20G215000/Glyma.17G083500…	88
0 h	03032	DNA replication proteins	119/4205	221/14423	9.34777e-15	5.20359e-13	4.1655e-13	Glyma.11G184100/Glyma.12G088300/Glyma.11G070700/Glyma.14G154200/Glyma.18G157402/Glyma.09G258700/Glyma.04G246600/Glyma.08G310900/Glyma.03G161300/Glyma.04G071600/Glyma.06G116100/Glyma.19G110900/Glyma.10G278800/Glyma.15G276000/Glyma.08G120900/Glyma.04G043500/Glyma.04G133700/Glyma.04G208600/Glyma.16G041400/Glyma.15G056100/Glyma.01G046400/Glyma.20G084000/Glyma.19G165900/Glyma.13G122100/Glyma.04G248900…	119		The top 50 enriched KEGG pathways showed here.
0 h	03040	Spliceosome	140/4205	310/14423	1.16431e-09	4.86098e-08	3.89124e-08	Glyma.02G205600/Glyma.12G239000/Glyma.17G072400/Glyma.04G208600/Glyma.20G084000/Glyma.17G063100/Glyma.14G196700/Glyma.17G115400/Glyma.15G097500/Glyma.07G252700/Glyma.07G130900/Glyma.06G157100/Glyma.05G149300/Glyma.20G204200/Glyma.19G082500/Glyma.07G205500/Glyma.19G196100/Glyma.05G127900/Glyma.02G229800/Glyma.11G086200/Glyma.03G143400/Glyma.03G152100/Glyma.18G266500/Glyma.02G232800/Glyma.19G114900…	140
0 h	03030	DNA replication	50/4205	87/14423	3.20389e-08	8.20393e-07	6.56728e-07	Glyma.11G070700/Glyma.18G157402/Glyma.10G278800/Glyma.04G248900/Glyma.17G104000/Glyma.14G133400/Glyma.12G206200/Glyma.18G067800/Glyma.09G047300/Glyma.20G111700/Glyma.17G035000/Glyma.02G286600/Glyma.01G030600/Glyma.05G020600/Glyma.05G014200/Glyma.03G219200/Glyma.07G238400/Glyma.17G078700/Glyma.17G202200/Glyma.11G113300/Glyma.12G096100/Glyma.05G124300/Glyma.15G154900/Glyma.05G129700/Glyma.19G216100…	50
0 h	03051	03051	81/4205	164/14423	3.33181e-08	8.20393e-07	6.56728e-07	Glyma.02G205600/Glyma.17G072400/Glyma.06G236100/Glyma.01G055500/Glyma.18G072700/Glyma.04G181200/Glyma.04G249300/Glyma.08G223800/Glyma.08G013300/Glyma.13G031200/Glyma.18G297400/Glyma.13G371600/Glyma.05G079000/Glyma.10G279900/Glyma.15G188800/Glyma.07G155700/Glyma.05G206400/Glyma.04G247000/Glyma.09G161300/Glyma.17G252100/Glyma.10G295600/Glyma.06G219200/Glyma.17G127100/Glyma.04G078200/Glyma.17G253600…	81
0 h	09124	Replication and repair	110/4205	241/14423	3.43877e-08	8.20393e-07	6.56728e-07	Glyma.11G184100/Glyma.12G088300/Glyma.11G070700/Glyma.18G157402/Glyma.18G023900/Glyma.03G161300/Glyma.02G261800/Glyma.10G278800/Glyma.09G189100/Glyma.08G120900/Glyma.01G158400/Glyma.15G092000/Glyma.04G248900/Glyma.07G100600/Glyma.17G104000/Glyma.14G133400/Glyma.05G163700/Glyma.13G366800/Glyma.13G010700/Glyma.12G206200/Glyma.18G067800/Glyma.09G047300/Glyma.07G059700/Glyma.20G111700/Glyma.17G035000…	110
0 h	03050	Proteasome	57/4205	105/14423	5.77819e-08	1.2062e-06	9.65566e-07	Glyma.04G181200/Glyma.04G249300/Glyma.13G031200/Glyma.05G079000/Glyma.10G279900/Glyma.07G155700/Glyma.09G161300/Glyma.17G252100/Glyma.10G295600/Glyma.06G219200/Glyma.17G127100/Glyma.04G078200/Glyma.17G253600/Glyma.04G077400/Glyma.14G073000/Glyma.18G206200/Glyma.03G170600/Glyma.08G286200/Glyma.06G021600/Glyma.20G109600/Glyma.01G165100/Glyma.14G152900/Glyma.06G171200/Glyma.12G147200/Glyma.14G071000…	57
0 h	03060	Protein export	50/4205	90/14423	1.41069e-07	2.61762e-06	2.09541e-06	Glyma.08G284800/Glyma.03G034100/Glyma.10G156400/Glyma.12G070500/Glyma.12G171400/Glyma.01G133400/Glyma.03G239600/Glyma.06G227200/Glyma.14G053200/Glyma.02G258900/Glyma.10G156000/Glyma.08G025700/Glyma.12G156800/Glyma.13G327801/Glyma.08G103600/Glyma.10G032800/Glyma.19G236500/Glyma.05G146700/Glyma.11G249600/Glyma.08G336000/Glyma.08G025900/Glyma.05G219400/Glyma.02G141101/Glyma.13G268600/Glyma.12G230900…	50
0 h	09121	Transcription	185/4205	465/14423	3.9187e-07	6.54423e-06	5.23868e-06	Glyma.02G205600/Glyma.17G050400/Glyma.12G239000/Glyma.17G201200/Glyma.17G072400/Glyma.03G129500/Glyma.18G281100/Glyma.04G208600/Glyma.20G084000/Glyma.17G063100/Glyma.02G035900/Glyma.14G196700/Glyma.09G016100/Glyma.17G115400/Glyma.18G212300/Glyma.15G097500/Glyma.01G029400/Glyma.07G252700/Glyma.07G130900/Glyma.06G157100/Glyma.06G096400/Glyma.03G178900/Glyma.05G149300/Glyma.20G204200/Glyma.19G082500…	185
0 h	03013	RNA transport	116/4205	271/14423	9.57438e-07	1.45356e-05	1.16358e-05	Glyma.13G148200/Glyma.16G160800/Glyma.19G188700/Glyma.05G154000/Glyma.01G224700/Glyma.16G071100/Glyma.05G114900/Glyma.20G171200/Glyma.04G074200/Glyma.13G232100/Glyma.15G097500/Glyma.02G206900/Glyma.17G071100/Glyma.06G041700/Glyma.18G133400/Glyma.04G040700/Glyma.10G136100/Glyma.03G002400/Glyma.13G363900/Glyma.19G240700/Glyma.09G234100/Glyma.18G024800/Glyma.14G051300/Glyma.19G052400/Glyma.15G010000…	116
0 h	00196	Photosynthesis - antenna proteins	23/4205	33/14423	1.67745e-06	2.33445e-05	1.86873e-05	Glyma.02G305400/Glyma.16G165200/Glyma.13G282000/Glyma.12G219300/Glyma.16G165500/Glyma.05G128000/Glyma.01G115900/Glyma.20G212900/Glyma.08G074000/Glyma.14G008000/Glyma.16G145800/Glyma.09G154700/Glyma.03G060300/Glyma.08G082900/Glyma.16G165800/Glyma.15G052400/Glyma.02G309500/Glyma.10G177200/Glyma.08G180000/Glyma.03G262300/Glyma.07G047600/Glyma.16G016100/Glyma.16G205200	23
0 h	03012	Translation factors	106/4205	247/14423	2.39981e-06	3.08284e-05	2.46782e-05	Glyma.01G054000/Glyma.09G275000/Glyma.13G073200/Glyma.02G276600/Glyma.16G001900/Glyma.02G112400/Glyma.05G114900/Glyma.04G195100/Glyma.06G170900/Glyma.14G039100/Glyma.12G165301/Glyma.04G080800/Glyma.18G133400/Glyma.10G136100/Glyma.20G215000/Glyma.03G002400/Glyma.08G167900/Glyma.05G024200/Glyma.06G082500/Glyma.18G107500/Glyma.08G305300/Glyma.09G234100/Glyma.18G024800/Glyma.19G052400/Glyma.09G089600…	106
0 h	03430	Mismatch repair	36/4205	65/14423	8.52465e-06	0.000101687	8.14008e-05	Glyma.11G070700/Glyma.10G278800/Glyma.09G189100/Glyma.08G120900/Glyma.01G158400/Glyma.04G248900/Glyma.07G100600/Glyma.14G133400/Glyma.05G163700/Glyma.12G206200/Glyma.18G067800/Glyma.20G111700/Glyma.01G030600/Glyma.05G020600/Glyma.05G014200/Glyma.17G121400/Glyma.17G078700/Glyma.17G202200/Glyma.12G096100/Glyma.05G124300/Glyma.08G334900/Glyma.02G034900/Glyma.17G130800/Glyma.13G294700/Glyma.02G034800…	36
0 h	03420	Nucleotide excision repair	51/4205	110/14423	9.40289e-05	0.00104686	0.000838012	Glyma.11G070700/Glyma.18G157402/Glyma.10G278800/Glyma.04G248900/Glyma.14G133400/Glyma.12G206200/Glyma.18G067800/Glyma.20G111700/Glyma.19G036900/Glyma.01G030600/Glyma.05G020600/Glyma.08G223800/Glyma.17G078700/Glyma.18G297400/Glyma.13G371600/Glyma.17G202200/Glyma.12G096100/Glyma.05G124300/Glyma.11G183100/Glyma.08G334900/Glyma.14G025300/Glyma.02G034900/Glyma.06G046400/Glyma.07G002800/Glyma.17G130800…	51
0 h	00220	Arginine biosynthesis	30/4205	56/14423	0.000108423	0.00113166	0.000905901	Glyma.05G146000/Glyma.19G111000/Glyma.01G204600/Glyma.05G046900/Glyma.01G131100/Glyma.14G213300/Glyma.16G153400/Glyma.10G044300/Glyma.11G047200/Glyma.04G073800/Glyma.07G104500/Glyma.05G066200/Glyma.07G179700/Glyma.20G009400/Glyma.06G096700/Glyma.17G128600/Glyma.04G094600/Glyma.01G194700/Glyma.11G043300/Glyma.04G030500/Glyma.05G236000/Glyma.06G030600/Glyma.06G275700/Glyma.05G046700/Glyma.06G082400…	30
0 h	00300	Lysine biosynthesis	14/4205	20/14423	0.000184693	0.00181434	0.00145239	Glyma.16G028900/Glyma.08G063500/Glyma.05G240700/Glyma.09G268200/Glyma.07G060300/Glyma.18G221700/Glyma.08G047800/Glyma.03G181200/Glyma.07G185700/Glyma.19G174300/Glyma.19G182000/Glyma.03G173400/Glyma.05G151100/Glyma.08G107800	14
0 h	00250	Alanine, aspartate and glutamate metabolism	44/4205	94/14423	0.000211667	0.0019638	0.00157203	Glyma.04G042100/Glyma.06G043000/Glyma.14G021000/Glyma.19G111000/Glyma.01G204600/Glyma.02G293500/Glyma.05G046900/Glyma.01G131100/Glyma.14G213300/Glyma.16G153400/Glyma.18G210500/Glyma.05G182600/Glyma.11G240200/Glyma.07G104500/Glyma.15G263500/Glyma.05G066200/Glyma.18G017200/Glyma.14G162300/Glyma.04G216000/Glyma.08G163700/Glyma.09G222700/Glyma.06G096700/Glyma.13G328600/Glyma.06G150000/Glyma.17G128600…	44
0 h	02044	Secretion system	38/4205	79/14423	0.00028156	0.00247477	0.00198106	Glyma.13G191200/Glyma.09G171600/Glyma.08G284800/Glyma.07G106600/Glyma.03G034100/Glyma.05G048400/Glyma.10G156400/Glyma.12G070500/Glyma.12G171400/Glyma.01G133400/Glyma.06G227200/Glyma.14G053200/Glyma.02G258900/Glyma.12G156800/Glyma.13G327801/Glyma.10G032800/Glyma.08G336000/Glyma.02G141101/Glyma.13G268600/Glyma.12G230900/Glyma.05G200600/Glyma.05G144700/Glyma.08G008000/Glyma.02G036200/Glyma.09G232500…	38
0 h	00061	Fatty acid biosynthesis	40/4205	85/14423	0.000350935	0.00293031	0.00234572	Glyma.14G121400/Glyma.13G038600/Glyma.19G028800/Glyma.06G112900/Glyma.13G057400/Glyma.18G265300/Glyma.08G345900/Glyma.18G057700/Glyma.15G052500/Glyma.12G027300/Glyma.11G101400/Glyma.11G164500/Glyma.07G207200/Glyma.09G277400/Glyma.05G221100/Glyma.18G156100/Glyma.08G349200/Glyma.05G129600/Glyma.08G084300/Glyma.18G009200/Glyma.02G138100/Glyma.18G243500/Glyma.08G027600/Glyma.08G179900/Glyma.13G079900…	40
0 h	00230	Purine metabolism	69/4205	168/14423	0.000597691	0.00475307	0.00380485	Glyma.05G146000/Glyma.10G121524/Glyma.19G182400/Glyma.11G047900/Glyma.03G189700/Glyma.02G182400/Glyma.16G173100/Glyma.14G115700/Glyma.15G106200/Glyma.05G000700/Glyma.15G073000/Glyma.04G065800/Glyma.03G109500/Glyma.09G126300/Glyma.07G115900/Glyma.05G045200/Glyma.07G258900/Glyma.19G000700/Glyma.06G067200/Glyma.10G178900/Glyma.01G210800/Glyma.10G156900/Glyma.10G241000/Glyma.17G212100/Glyma.03G181900…	69
0 h	09104	Nucleotide metabolism	93/4205	239/14423	0.000692855	0.00517135	0.00413969	Glyma.05G146000/Glyma.14G021000/Glyma.02G293500/Glyma.10G121524/Glyma.03G089400/Glyma.15G217500/Glyma.19G182400/Glyma.11G047900/Glyma.03G189700/Glyma.08G232600/Glyma.02G182400/Glyma.16G173100/Glyma.14G115700/Glyma.15G106200/Glyma.05G000700/Glyma.15G073000/Glyma.04G065800/Glyma.03G109500/Glyma.09G126300/Glyma.07G115900/Glyma.05G048400/Glyma.05G045200/Glyma.11G115200/Glyma.07G258900/Glyma.19G000700…	93
0 h	04812	Cytoskeleton proteins	117/4205	311/14423	0.000712222	0.00517135	0.00413969	Glyma.08G106400/Glyma.05G149700/Glyma.19G235300/Glyma.03G237700/Glyma.15G150100/Glyma.10G182800/Glyma.10G149500/Glyma.13G335600/Glyma.09G136400/Glyma.05G154000/Glyma.10G154200/Glyma.08G062500/Glyma.20G234200/Glyma.10G154100/Glyma.11G052200/Glyma.13G310700/Glyma.08G041200/Glyma.11G253200/Glyma.13G133200/Glyma.02G302800/Glyma.12G191000/Glyma.15G252800/Glyma.01G021200/Glyma.20G159200/Glyma.20G207200…	117
0 h	00010	Glycolysis / Gluconeogenesis	94/4205	243/14423	0.000815541	0.0056748	0.00454271	Glyma.13G035200/Glyma.01G118000/Glyma.14G121200/Glyma.06G032500/Glyma.01G116700/Glyma.03G189700/Glyma.10G041000/Glyma.19G078300/Glyma.07G269500/Glyma.16G173100/Glyma.06G105600/Glyma.18G200300/Glyma.05G080500/Glyma.01G019200/Glyma.05G058100/Glyma.08G199800/Glyma.06G208200/Glyma.05G000700/Glyma.18G257700/Glyma.07G241600/Glyma.09G126300/Glyma.06G122600/Glyma.19G000700/Glyma.16G018300/Glyma.18G137300…	94
0 h	00333	Prodigiosin biosynthesis	8/4205	10/14423	0.00128636	0.0085929	0.00687865	Glyma.08G345900/Glyma.18G057700/Glyma.12G027300/Glyma.11G101400/Glyma.11G164500/Glyma.18G156100/Glyma.18G009200/Glyma.11G248000	8
0 h	03440	Homologous recombination	40/4205	90/14423	0.00142559	0.00915669	0.00732997	Glyma.18G023900/Glyma.02G261800/Glyma.10G278800/Glyma.15G092000/Glyma.14G133400/Glyma.13G010700/Glyma.12G206200/Glyma.20G111700/Glyma.01G030600/Glyma.05G020600/Glyma.04G181200/Glyma.09G070600/Glyma.05G014200/Glyma.U027200/Glyma.17G078700/Glyma.17G202200/Glyma.13G115000/Glyma.05G124300/Glyma.12G029200/Glyma.14G025300/Glyma.02G034900/Glyma.09G103100/Glyma.11G104200/Glyma.13G363400/Glyma.13G294700/G…	40
0 h	00780	Biotin metabolism	15/4205	26/14423	0.00221015	0.0136702	0.0109431	Glyma.08G345900/Glyma.15G052500/Glyma.12G027300/Glyma.11G101400/Glyma.18G156100/Glyma.05G129600/Glyma.08G084300/Glyma.18G009200/Glyma.08G179900/Glyma.11G248000/Glyma.08G024700/Glyma.17G047000/Glyma.06G109600/Glyma.13G128000/Glyma.12G020600	15
0 h	03400	DNA repair and recombination proteins	158/4205	448/14423	0.00258329	0.0154075	0.0123338	Glyma.11G184100/Glyma.12G088300/Glyma.11G070700/Glyma.18G157402/Glyma.18G023900/Glyma.10G029000/Glyma.03G161300/Glyma.03G129500/Glyma.02G261800/Glyma.10G278800/Glyma.09G189100/Glyma.08G120900/Glyma.09G264000/Glyma.01G158400/Glyma.15G092000/Glyma.04G248900/Glyma.18G048400/Glyma.07G100600/Glyma.02G035900/Glyma.09G016100/Glyma.15G060100/Glyma.14G133400/Glyma.05G163700/Glyma.19G243600/Glyma.13G353300…	158
0 h	03020	RNA polymerase	31/4205	69/14423	0.00382285	0.0220144	0.0176226	Glyma.17G050400/Glyma.17G201200/Glyma.03G129500/Glyma.18G281100/Glyma.02G035900/Glyma.09G016100/Glyma.01G029400/Glyma.06G096400/Glyma.03G178900/Glyma.07G220900/Glyma.16G212700/Glyma.07G084000/Glyma.10G238600/Glyma.18G179600/Glyma.15G121800/Glyma.09G228500/Glyma.03G218500/Glyma.09G037400/Glyma.07G241200/Glyma.15G077800/Glyma.09G164200/Glyma.18G075300/Glyma.15G269500/Glyma.19G045500/Glyma.12G008000…	31
4 h	03009	Ribosome biogenesis	250/4076	469/14423	4.25765e-31	7.11028e-29	5.60218e-29	Glyma.02G205600/Glyma.08G081400/Glyma.14G013102/Glyma.17G072400/Glyma.08G197900/Glyma.09G104000/Glyma.15G056100/Glyma.11G101500/Glyma.16G099100/Glyma.14G024600/Glyma.18G287900/Glyma.12G027400/Glyma.14G115100/Glyma.06G071900/Glyma.19G186600/Glyma.10G022600/Glyma.11G114300/Glyma.08G316100/Glyma.16G012100/Glyma.02G290200/Glyma.03G263200/Glyma.08G176900/Glyma.05G027800/Glyma.05G046400/Glyma.17G128400…	250
4 h	03008	Ribosome biogenesis in eukaryotes	85/4076	147/14423	5.00369e-14	4.17808e-12	3.2919e-12	Glyma.15G056100/Glyma.14G024600/Glyma.19G186600/Glyma.10G022600/Glyma.11G114300/Glyma.02G290200/Glyma.08G176900/Glyma.05G046400/Glyma.17G128400/Glyma.07G035600/Glyma.19G110900/Glyma.16G041400/Glyma.09G084600/Glyma.08G359600/Glyma.16G071100/Glyma.07G261900/Glyma.11G125100/Glyma.03G214900/Glyma.04G200700/Glyma.11G175746/Glyma.12G095400/Glyma.12G049700/Glyma.15G193000/Glyma.11G152600/Glyma.05G185000…	85
4 h	03013	RNA transport	133/4076	271/14423	2.1263e-13	1.18364e-11	9.32589e-12	Glyma.16G160800/Glyma.19G188700/Glyma.13G148200/Glyma.20G171200/Glyma.04G074200/Glyma.03G106500/Glyma.19G240700/Glyma.01G224700/Glyma.07G117800/Glyma.05G003500/Glyma.15G010000/Glyma.05G114900/Glyma.19G263400/Glyma.06G222100/Glyma.16G071100/Glyma.19G101600/Glyma.04G040700/Glyma.06G041700/Glyma.12G024600/Glyma.13G363900/Glyma.06G075300/Glyma.02G147200/Glyma.17G240400/Glyma.19G052400/Glyma.14G051300…	133
4 h	03032	DNA replication proteins	105/4076	221/14423	7.66068e-10	3.19833e-08	2.51996e-08	Glyma.11G184100/Glyma.14G154200/Glyma.11G070700/Glyma.12G088300/Glyma.15G276000/Glyma.13G025000/Glyma.04G246600/Glyma.08G310900/Glyma.03G161300/Glyma.18G157402/Glyma.10G035700/Glyma.20G123000/Glyma.07G100600/Glyma.09G258700/Glyma.17G035000/Glyma.15G056100/Glyma.04G133700/Glyma.13G122100/Glyma.06G116100/Glyma.10G268100/Glyma.06G310500/Glyma.09G047300/Glyma.17G104000/Glyma.03G219200/Glyma.11G113300…	105
4 h	09124	Replication and repair	111/4076	241/14423	2.42726e-09	8.10705e-08	6.38753e-08	Glyma.11G184100/Glyma.11G070700/Glyma.12G088300/Glyma.13G025000/Glyma.03G161300/Glyma.02G261800/Glyma.18G157402/Glyma.07G087700/Glyma.07G100600/Glyma.01G158400/Glyma.13G220400/Glyma.17G035000/Glyma.13G010700/Glyma.15G092000/Glyma.09G189100/Glyma.06G310500/Glyma.09G047300/Glyma.17G104000/Glyma.03G219200/Glyma.11G113300/Glyma.12G039200/Glyma.19G216100/Glyma.13G156400/Glyma.15G154900/Glyma.10G014100…	111
4 h	04812	Cytoskeleton proteins	133/4076	311/14423	2.25278e-08	6.27025e-07	4.94031e-07	Glyma.05G149700/Glyma.08G106400/Glyma.01G021200/Glyma.02G135700/Glyma.20G234100/Glyma.12G191000/Glyma.08G041200/Glyma.15G150100/Glyma.09G136400/Glyma.11G253200/Glyma.10G182800/Glyma.13G133200/Glyma.02G302800/Glyma.10G045500/Glyma.02G296800/Glyma.13G310700/Glyma.15G063200/Glyma.15G252800/Glyma.18G082000/Glyma.08G311700/Glyma.20G234200/Glyma.20G159200/Glyma.19G137500/Glyma.07G209300/Glyma.07G186700…	133
4 h	03018	RNA degradation	86/4076	188/14423	2.15537e-07	5.1421e-06	4.05145e-06	Glyma.16G160800/Glyma.19G188700/Glyma.13G148200/Glyma.01G024800/Glyma.02G293100/Glyma.09G261400/Glyma.07G269500/Glyma.06G208200/Glyma.20G171200/Glyma.08G192700/Glyma.12G239000/Glyma.20G122600/Glyma.08G199800/Glyma.10G193200/Glyma.04G040700/Glyma.06G041700/Glyma.06G088600/Glyma.16G204600/Glyma.15G122400/Glyma.09G115600/Glyma.17G052100/Glyma.09G016800/Glyma.17G240400/Glyma.04G086900/Glyma.19G115100…	86
4 h	03040	Spliceosome	128/4076	310/14423	4.43303e-07	8.89834e-06	7.01099e-06	Glyma.02G205600/Glyma.17G072400/Glyma.12G239000/Glyma.18G287900/Glyma.19G101600/Glyma.15G007100/Glyma.09G007700/Glyma.08G173500/Glyma.15G253800/Glyma.10G255700/Glyma.02G139900/Glyma.11G012200/Glyma.20G000700/Glyma.14G089078/Glyma.11G199100/Glyma.07G205500/Glyma.13G366100/Glyma.10G291300/Glyma.14G217400/Glyma.15G068100/Glyma.09G114600/Glyma.05G241400/Glyma.16G049600/Glyma.04G133800/Glyma.15G083300…	128
4 h	03012	Translation factors	106/4076	247/14423	4.79552e-07	8.89834e-06	7.01099e-06	Glyma.03G106500/Glyma.07G117800/Glyma.05G114900/Glyma.16G001900/Glyma.09G275000/Glyma.08G170000/Glyma.15G218700/Glyma.02G276600/Glyma.08G152400/Glyma.11G163201/Glyma.19G052400/Glyma.03G002400/Glyma.04G080800/Glyma.14G015800/Glyma.03G150600/Glyma.15G271800/Glyma.16G216100/Glyma.18G107500/Glyma.15G075100/Glyma.07G107700/Glyma.09G046000/Glyma.15G257100/Glyma.12G241600/Glyma.09G077900/Glyma.01G054000…	106
4 h	03015	mRNA surveillance pathway	93/4076	213/14423	9.54609e-07	1.5942e-05	1.25606e-05	Glyma.16G160800/Glyma.19G188700/Glyma.13G148200/Glyma.04G071700/Glyma.06G073000/Glyma.20G171200/Glyma.09G035800/Glyma.15G140800/Glyma.19G101600/Glyma.04G040700/Glyma.06G041700/Glyma.09G153100/Glyma.17G240400/Glyma.04G047800/Glyma.16G216100/Glyma.02G306700/Glyma.16G203900/Glyma.20G201300/Glyma.16G049600/Glyma.07G144500/Glyma.17G240500/Glyma.04G089400/Glyma.11G123500/Glyma.18G196200/Glyma.01G121400…	93
4 h	03030	DNA replication	44/4076	87/14423	8.67774e-06	0.000131744	0.000103801	Glyma.11G070700/Glyma.13G025000/Glyma.18G157402/Glyma.17G035000/Glyma.06G310500/Glyma.09G047300/Glyma.17G104000/Glyma.03G219200/Glyma.11G113300/Glyma.12G039200/Glyma.19G216100/Glyma.13G156400/Glyma.15G154900/Glyma.14G025300/Glyma.05G129700/Glyma.17G078700/Glyma.07G238400/Glyma.08G313400/Glyma.18G067800/Glyma.02G286600/Glyma.04G248900/Glyma.01G187400/Glyma.08G084400/Glyma.09G213500/Glyma.12G096100…	44
4 h	00220	Arginine biosynthesis	30/4076	56/14423	5.76422e-05	0.000802187	0.000632042	Glyma.05G146000/Glyma.01G204600/Glyma.19G111000/Glyma.05G046900/Glyma.14G213300/Glyma.10G044300/Glyma.11G047200/Glyma.07G179700/Glyma.01G131100/Glyma.20G009400/Glyma.04G073800/Glyma.06G096700/Glyma.17G128600/Glyma.04G094600/Glyma.01G194700/Glyma.17G216000/Glyma.07G118300/Glyma.12G012400/Glyma.05G046700/Glyma.06G275700/Glyma.05G236000/Glyma.11G043300/Glyma.20G000500/Glyma.05G066200/Glyma.07G104500…	30
4 h	02048	Prokaryotic defense system	14/4076	20/14423	0.000127666	0.00164001	0.00129216	Glyma.04G187600/Glyma.10G141500/Glyma.01G007800/Glyma.20G090100/Glyma.11G083600/Glyma.18G089400/Glyma.08G322800/Glyma.06G178200/Glyma.16G103500/Glyma.19G194800/Glyma.03G195200/Glyma.10G071800/Glyma.07G124000/Glyma.03G097900	14
4 h	00250	Alanine, aspartate and glutamate metabolism	43/4076	94/14423	0.000220133	0.00262587	0.00206892	Glyma.04G042100/Glyma.06G043000/Glyma.01G204600/Glyma.14G021000/Glyma.19G111000/Glyma.02G293500/Glyma.18G210500/Glyma.05G046900/Glyma.14G162300/Glyma.14G213300/Glyma.11G240200/Glyma.19G065600/Glyma.05G182600/Glyma.06G127400/Glyma.13G328600/Glyma.02G241400/Glyma.01G131100/Glyma.18G017200/Glyma.04G236900/Glyma.17G238200/Glyma.15G045100/Glyma.15G263500/Glyma.09G222700/Glyma.09G249100/Glyma.06G096700…	43
4 h	00010	Glycolysis / Gluconeogenesis	94/4076	243/14423	0.000259412	0.00288813	0.00227555	Glyma.13G035200/Glyma.10G041000/Glyma.14G121200/Glyma.01G116700/Glyma.19G078300/Glyma.01G118000/Glyma.06G032500/Glyma.01G024800/Glyma.03G189700/Glyma.16G173100/Glyma.01G019200/Glyma.07G269500/Glyma.06G208200/Glyma.18G200300/Glyma.09G126300/Glyma.06G105600/Glyma.07G241600/Glyma.05G058100/Glyma.10G241000/Glyma.15G143100/Glyma.06G122600/Glyma.10G178900/Glyma.05G000700/Glyma.10G215400/Glyma.18G257700…	94
4 h	03410	Base excision repair	31/4076	63/14423	0.000337229	0.00335219	0.00264118	Glyma.11G184100/Glyma.12G088300/Glyma.03G161300/Glyma.18G157402/Glyma.14G025300/Glyma.08G313400/Glyma.13G366800/Glyma.18G067800/Glyma.17G073900/Glyma.07G059700/Glyma.12G080900/Glyma.02G203900/Glyma.06G155300/Glyma.U031407/Glyma.12G087000/Glyma.13G360800/Glyma.02G289700/Glyma.18G292900/Glyma.10G141800/Glyma.04G210700/Glyma.16G218700/Glyma.02G065600/Glyma.15G013100/Glyma.20G090300/Glyma.15G265200/G…	31
4 h	09121	Transcription	165/4076	465/14423	0.000341241	0.00335219	0.00264118	Glyma.02G205600/Glyma.17G072400/Glyma.17G201200/Glyma.17G050400/Glyma.12G239000/Glyma.18G287900/Glyma.03G129500/Glyma.19G101600/Glyma.09G066000/Glyma.15G007100/Glyma.09G007700/Glyma.08G173500/Glyma.05G013400/Glyma.15G253800/Glyma.10G255700/Glyma.02G139900/Glyma.10G095200/Glyma.11G012200/Glyma.20G000700/Glyma.14G089078/Glyma.11G199100/Glyma.07G205500/Glyma.13G366100/Glyma.10G291300/Glyma.17G121600…	165
4 h	03400	DNA repair and recombination proteins	159/4076	448/14423	0.000428932	0.00397954	0.00313547	Glyma.11G184100/Glyma.11G070700/Glyma.12G088300/Glyma.13G025000/Glyma.03G161300/Glyma.10G029000/Glyma.02G261800/Glyma.18G157402/Glyma.07G087700/Glyma.09G264000/Glyma.07G100600/Glyma.01G158400/Glyma.13G220400/Glyma.13G010700/Glyma.20G087900/Glyma.15G092000/Glyma.09G189100/Glyma.15G060100/Glyma.03G237200/Glyma.10G284200/Glyma.10G014100/Glyma.08G238200/Glyma.17G121400/Glyma.14G025300/Glyma.U027200/G…	159
4 h	00061	Fatty acid biosynthesis	38/4076	85/14423	0.000861841	0.00757513	0.00596843	Glyma.14G121400/Glyma.13G038600/Glyma.06G112900/Glyma.19G028800/Glyma.18G265300/Glyma.13G057400/Glyma.02G138100/Glyma.07G207200/Glyma.18G057700/Glyma.08G349200/Glyma.05G221100/Glyma.05G129600/Glyma.11G101400/Glyma.08G084300/Glyma.05G216600/Glyma.12G027300/Glyma.11G164500/Glyma.13G079900/Glyma.18G156100/Glyma.09G277400/Glyma.08G345900/Glyma.18G195900/Glyma.08G027600/Glyma.04G104900/Glyma.18G243500…	38
4 h	00970	Aminoacyl-tRNA biosynthesis	36/4076	80/14423	0.00100643	0.00814205	0.0064151	Glyma.12G020700/Glyma.10G141500/Glyma.11G034100/Glyma.10G272800/Glyma.20G090100/Glyma.01G032500/Glyma.01G208100/Glyma.10G239500/Glyma.13G152678/Glyma.11G094300/Glyma.11G102100/Glyma.10G289600/Glyma.20G233300/Glyma.05G224000/Glyma.13G000200/Glyma.05G234900/Glyma.03G224500/Glyma.08G363700/Glyma.12G043200/Glyma.08G031100/Glyma.19G221400/Glyma.07G125400/Glyma.01G006400/Glyma.12G018400/Glyma.10G155000…	36
4 h	00333	Prodigiosin biosynthesis	8/4076	10/14423	0.00102385	0.00814205	0.0064151	Glyma.18G057700/Glyma.11G101400/Glyma.12G027300/Glyma.11G164500/Glyma.18G156100/Glyma.08G345900/Glyma.18G009200/Glyma.11G248000	8
4 h	03430	Mismatch repair	30/4076	65/14423	0.00157471	0.0119535	0.00941815	Glyma.11G070700/Glyma.13G025000/Glyma.07G087700/Glyma.07G100600/Glyma.01G158400/Glyma.09G189100/Glyma.17G121400/Glyma.17G078700/Glyma.18G067800/Glyma.04G248900/Glyma.08G120900/Glyma.09G213500/Glyma.12G096100/Glyma.05G020600/Glyma.06G308700/Glyma.10G019200/Glyma.12G080900/Glyma.17G130800/Glyma.05G163700/Glyma.14G133400/Glyma.06G155300/Glyma.17G202200/Glyma.19G216000/Glyma.18G292900/Glyma.04G254900…	30
4 h	03016	Transfer RNA biogenesis	108/4076	299/14423	0.00172633	0.0125347	0.00987604	Glyma.02G107900/Glyma.19G240700/Glyma.05G114900/Glyma.12G020700/Glyma.19G263400/Glyma.09G175800/Glyma.16G071100/Glyma.10G141500/Glyma.11G034100/Glyma.05G121000/Glyma.10G272800/Glyma.20G090100/Glyma.01G032500/Glyma.19G052400/Glyma.14G051300/Glyma.08G090700/Glyma.16G165400/Glyma.01G208100/Glyma.07G101300/Glyma.03G245900/Glyma.10G239500/Glyma.13G152678/Glyma.11G092200/Glyma.13G282700/Glyma.08G075600…	108
4 h	04091	Lectins	13/4076	22/14423	0.00240037	0.0167026	0.0131599	Glyma.04G202900/Glyma.08G006500/Glyma.05G199200/Glyma.06G162600/Glyma.10G147600/Glyma.20G098400/Glyma.19G255000/Glyma.16G026200/Glyma.03G256800/Glyma.10G179900/Glyma.11G126100/Glyma.07G057200/Glyma.07G224600	13
4 h	09107	Glycan biosynthesis and metabolism	73/4076	194/14423	0.00279478	0.0186691	0.0147093	Glyma.16G154600/Glyma.10G174500/Glyma.13G182200/Glyma.12G088100/Glyma.20G152400/Glyma.04G200900/Glyma.02G073200/Glyma.09G138300/Glyma.20G216000/Glyma.09G273400/Glyma.20G240000/Glyma.18G215700/Glyma.10G091000/Glyma.16G048100/Glyma.13G241600/Glyma.01G009300/Glyma.09G165000/Glyma.02G190700/Glyma.16G213300/Glyma.04G209000/Glyma.10G105900/Glyma.19G103200/Glyma.17G108200/Glyma.16G126400/Glyma.17G131000…	73
4 h	00300	Lysine biosynthesis	12/4076	20/14423	0.00295949	0.019009	0.0149772	Glyma.16G028900/Glyma.08G063500/Glyma.07G060300/Glyma.09G268200/Glyma.05G240700/Glyma.05G151100/Glyma.18G221700/Glyma.08G107800/Glyma.03G181200/Glyma.07G185700/Glyma.08G047800/Glyma.19G182000	12
4 h	01007	Amino acid related enzymes	55/4076	141/14423	0.00365242	0.0225909	0.0177993	Glyma.07G186000/Glyma.07G186100/Glyma.18G210500/Glyma.05G182600/Glyma.01G131100/Glyma.12G020700/Glyma.08G063500/Glyma.16G203600/Glyma.10G141500/Glyma.11G034100/Glyma.06G235500/Glyma.10G272800/Glyma.20G090100/Glyma.01G032500/Glyma.01G208100/Glyma.10G239500/Glyma.13G152678/Glyma.11G045300/Glyma.11G094300/Glyma.11G102100/Glyma.10G289600/Glyma.20G233300/Glyma.17G216000/Glyma.05G224000/Glyma.13G000200…	55
4 h	00513	Various types of N-glycan biosynthesis	28/4076	63/14423	0.00434949	0.0259416	0.0204393	Glyma.16G154600/Glyma.02G073200/Glyma.20G240000/Glyma.01G009300/Glyma.09G165000/Glyma.16G213300/Glyma.19G165800/Glyma.04G015300/Glyma.10G038000/Glyma.12G229300/Glyma.06G015400/Glyma.19G210000/Glyma.12G045400/Glyma.17G038100/Glyma.08G159500/Glyma.13G068100/Glyma.11G120300/Glyma.10G290900/Glyma.16G077300/Glyma.13G270500/Glyma.03G213200/Glyma.02G108100/Glyma.01G048500/Glyma.03G108200/Glyma.18G286200…	28
4 h	00660	C5-Branched dibasic acid metabolism	9/4076	14/14423	0.00535081	0.0308133	0.0242777	Glyma.05G167700/Glyma.06G169700/Glyma.11G079000/Glyma.14G217300/Glyma.13G367900/Glyma.15G005400/Glyma.17G256102/Glyma.08G126100/Glyma.13G241000	9
4 h	03021	Transcription machinery	137/4076	402/14423	0.00564541	0.0314261	0.0247606	Glyma.03G230500/Glyma.17G201200/Glyma.06G312200/Glyma.06G170800/Glyma.08G021700/Glyma.15G087100/Glyma.01G215700/Glyma.05G215500/Glyma.04G195200/Glyma.06G061600/Glyma.17G050400/Glyma.15G235900/Glyma.18G234700/Glyma.13G196900/Glyma.19G170200/Glyma.04G238200/Glyma.03G129500/Glyma.13G324500/Glyma.01G166400/Glyma.04G061000/Glyma.09G066000/Glyma.07G069400/Glyma.09G153100/Glyma.09G257900/Glyma.11G026700…	137
4 h	03110	Chaperones and folding catalysts	165/4076	494/14423	0.00624916	0.0336648	0.0265244	Glyma.02G076600/Glyma.02G252800/Glyma.02G205600/Glyma.15G077700/Glyma.14G063700/Glyma.06G073300/Glyma.17G072400/Glyma.02G187800/Glyma.10G195200/Glyma.19G096600/Glyma.13G077300/Glyma.04G247900/Glyma.20G065900/Glyma.20G240000/Glyma.20G073000/Glyma.03G232000/Glyma.11G146800/Glyma.08G192700/Glyma.04G202900/Glyma.05G022200/Glyma.03G129600/Glyma.18G287900/Glyma.08G006500/Glyma.08G025700/Glyma.20G215100…	165
4 h	03420	Nucleotide excision repair	43/4076	110/14423	0.0089891	0.0469118	0.0369617	Glyma.11G070700/Glyma.13G025000/Glyma.18G157402/Glyma.14G025300/Glyma.17G078700/Glyma.08G313400/Glyma.18G067800/Glyma.04G248900/Glyma.09G213500/Glyma.12G096100/Glyma.05G020600/Glyma.06G046400/Glyma.15G249700/Glyma.13G371600/Glyma.11G038500/Glyma.06G308700/Glyma.12G080900/Glyma.08G223800/Glyma.05G140800/Glyma.17G130800/Glyma.U031908/Glyma.14G133400/Glyma.06G155300/Glyma.08G096100/Glyma.17G202200/G…	43
8 h	03050	Proteasome	79/4292	105/14423	6.35117e-22	1.06065e-19	8.2231e-20	Glyma.07G155700/Glyma.10G295600/Glyma.05G079000/Glyma.18G029800/Glyma.04G249300/Glyma.17G252100/Glyma.17G127100/Glyma.08G286200/Glyma.04G078200/Glyma.09G161300/Glyma.03G170600/Glyma.18G206200/Glyma.14G073000/Glyma.13G031200/Glyma.14G071000/Glyma.06G171200/Glyma.04G077400/Glyma.12G147200/Glyma.10G043000/Glyma.10G279900/Glyma.20G245500/Glyma.01G165100/Glyma.19G072100/Glyma.14G152900/Glyma.18G138900…	79
8 h	03051	03051	107/4292	164/14423	4.12531e-21	3.44463e-19	2.67059e-19	Glyma.02G205600/Glyma.17G072400/Glyma.18G287900/Glyma.06G236100/Glyma.01G055500/Glyma.18G297400/Glyma.07G155700/Glyma.10G295600/Glyma.05G079000/Glyma.18G029800/Glyma.04G249300/Glyma.17G252100/Glyma.17G127100/Glyma.08G286200/Glyma.04G078200/Glyma.09G161300/Glyma.03G170600/Glyma.08G013300/Glyma.18G206200/Glyma.14G073000/Glyma.11G122900/Glyma.13G031200/Glyma.14G071000/Glyma.06G171200/Glyma.04G077400…	107
8 h	03009	Ribosome biogenesis	215/4292	469/14423	5.96573e-14	3.32092e-12	2.57468e-12	Glyma.02G205600/Glyma.14G013102/Glyma.08G081400/Glyma.17G072400/Glyma.18G287900/Glyma.16G041400/Glyma.19G110900/Glyma.19G165900/Glyma.13G107200/Glyma.15G056100/Glyma.08G058500/Glyma.18G020000/Glyma.09G023100/Glyma.17G115400/Glyma.06G071900/Glyma.08G176900/Glyma.10G006200/Glyma.04G069900/Glyma.12G028500/Glyma.13G142300/Glyma.11G103700/Glyma.08G184300/Glyma.08G252500/Glyma.02G151500/Glyma.04G200700…	215
8 h	03032	DNA replication proteins	104/4292	221/14423	3.65036e-08	1.52403e-06	1.18156e-06	Glyma.11G184100/Glyma.11G070700/Glyma.12G088300/Glyma.18G157402/Glyma.04G246600/Glyma.04G043500/Glyma.14G154200/Glyma.03G161300/Glyma.16G041400/Glyma.19G110900/Glyma.09G258700/Glyma.04G208600/Glyma.08G310900/Glyma.18G067800/Glyma.19G165900/Glyma.05G020600/Glyma.20G084000/Glyma.13G031500/Glyma.15G276000/Glyma.04G071600/Glyma.05G129700/Glyma.17G078700/Glyma.15G056100/Glyma.13G122100/Glyma.06G116100…	104
8 h	03040	Spliceosome	135/4292	310/14423	1.3951e-07	4.65962e-06	3.61257e-06	Glyma.02G205600/Glyma.17G072400/Glyma.18G287900/Glyma.12G239000/Glyma.04G208600/Glyma.20G084000/Glyma.15G097500/Glyma.17G115400/Glyma.17G063100/Glyma.03G152100/Glyma.08G105900/Glyma.05G127900/Glyma.18G266500/Glyma.07G130900/Glyma.09G283300/Glyma.07G252700/Glyma.07G205500/Glyma.05G149300/Glyma.20G075100/Glyma.06G157100/Glyma.14G200400/Glyma.10G123200/Glyma.14G068500/Glyma.14G196700/Glyma.19G082500…	135
8 h	03008	Ribosome biogenesis in eukaryotes	73/4292	147/14423	2.88411e-07	8.02743e-06	6.2236e-06	Glyma.16G041400/Glyma.19G110900/Glyma.19G165900/Glyma.15G056100/Glyma.18G020000/Glyma.17G115400/Glyma.08G176900/Glyma.02G151500/Glyma.04G200700/Glyma.10G022600/Glyma.11G152600/Glyma.11G142700/Glyma.17G083500/Glyma.17G029800/Glyma.04G139900/Glyma.11G114300/Glyma.08G013300/Glyma.17G128400/Glyma.10G232700/Glyma.11G237200/Glyma.14G196700/Glyma.11G213900/Glyma.20G161600/Glyma.04G069100/Glyma.17G012200…	73
8 h	03030	DNA replication	48/4292	87/14423	6.44874e-07	1.53848e-05	1.19277e-05	Glyma.11G070700/Glyma.18G157402/Glyma.18G067800/Glyma.05G020600/Glyma.05G129700/Glyma.17G078700/Glyma.17G202200/Glyma.14G133400/Glyma.09G047300/Glyma.15G154900/Glyma.11G113300/Glyma.18G009300/Glyma.10G278800/Glyma.04G248900/Glyma.07G238400/Glyma.17G104000/Glyma.02G286600/Glyma.17G035000/Glyma.03G219200/Glyma.08G334900/Glyma.20G111700/Glyma.01G030600/Glyma.12G039200/Glyma.12G206200/Glyma.05G014200…	48
8 h	03060	Protein export	48/4292	90/14423	2.39013e-06	4.98939e-05	3.86823e-05	Glyma.06G227200/Glyma.03G034100/Glyma.12G070500/Glyma.01G133400/Glyma.03G239600/Glyma.12G171400/Glyma.08G025700/Glyma.08G103600/Glyma.14G053200/Glyma.12G156800/Glyma.05G146700/Glyma.08G336000/Glyma.10G156000/Glyma.13G327801/Glyma.02G258900/Glyma.02G141101/Glyma.08G284800/Glyma.05G219400/Glyma.19G236500/Glyma.12G230900/Glyma.18G071100/Glyma.13G268600/Glyma.08G025900/Glyma.02G254500/Glyma.11G155259…	48
8 h	09121	Transcription	183/4292	465/14423	4.42779e-06	8.21601e-05	6.36981e-05	Glyma.02G205600/Glyma.17G072400/Glyma.17G050400/Glyma.18G287900/Glyma.03G129500/Glyma.12G239000/Glyma.18G281100/Glyma.04G208600/Glyma.20G084000/Glyma.15G097500/Glyma.17G115400/Glyma.17G063100/Glyma.03G152100/Glyma.06G096400/Glyma.08G105900/Glyma.07G220900/Glyma.05G127900/Glyma.18G266500/Glyma.07G130900/Glyma.09G283300/Glyma.07G252700/Glyma.07G084000/Glyma.07G205500/Glyma.05G149300/Glyma.20G075100…	183
8 h	00220	Arginine biosynthesis	32/4292	56/14423	1.78042e-05	0.00029733	0.000230518	Glyma.05G146000/Glyma.19G111000/Glyma.01G204600/Glyma.16G153400/Glyma.05G046900/Glyma.01G131100/Glyma.14G213300/Glyma.11G047200/Glyma.10G044300/Glyma.17G128600/Glyma.05G046700/Glyma.06G082400/Glyma.11G043300/Glyma.04G030500/Glyma.07G104500/Glyma.04G073800/Glyma.20G009400/Glyma.07G179700/Glyma.06G030600/Glyma.05G236000/Glyma.06G096700/Glyma.04G094600/Glyma.05G066200/Glyma.01G194700/Glyma.17G216000…	32
8 h	09124	Replication and repair	102/4292	241/14423	1.98852e-05	0.000301894	0.000234056	Glyma.11G184100/Glyma.11G070700/Glyma.12G088300/Glyma.18G157402/Glyma.02G261800/Glyma.03G161300/Glyma.18G067800/Glyma.05G020600/Glyma.05G129700/Glyma.08G232900/Glyma.17G078700/Glyma.17G202200/Glyma.14G133400/Glyma.08G120900/Glyma.07G087700/Glyma.13G220400/Glyma.18G297400/Glyma.09G047300/Glyma.15G154900/Glyma.11G113300/Glyma.18G009300/Glyma.U027200/Glyma.10G278800/Glyma.13G115000/Glyma.04G248900/G…	102
8 h	09104	Nucleotide metabolism	100/4292	239/14423	4.155e-05	0.000578238	0.000448303	Glyma.05G146000/Glyma.10G121524/Glyma.02G293500/Glyma.14G021000/Glyma.15G217500/Glyma.03G089400/Glyma.19G182400/Glyma.04G065800/Glyma.08G232600/Glyma.02G182400/Glyma.05G000700/Glyma.16G173100/Glyma.03G189700/Glyma.11G047900/Glyma.03G109500/Glyma.14G115700/Glyma.09G126300/Glyma.07G115900/Glyma.15G106200/Glyma.19G000700/Glyma.10G178900/Glyma.18G048400/Glyma.10G100800/Glyma.06G067200/Glyma.10G201100…	100
8 h	00230	Purine metabolism	73/4292	168/14423	0.000106382	0.00136638	0.00105934	Glyma.05G146000/Glyma.10G121524/Glyma.19G182400/Glyma.04G065800/Glyma.02G182400/Glyma.05G000700/Glyma.16G173100/Glyma.03G189700/Glyma.11G047900/Glyma.03G109500/Glyma.14G115700/Glyma.09G126300/Glyma.07G115900/Glyma.15G106200/Glyma.19G000700/Glyma.10G178900/Glyma.10G100800/Glyma.06G067200/Glyma.10G201100/Glyma.05G045200/Glyma.07G258900/Glyma.15G073000/Glyma.10G241000/Glyma.10G156900/Glyma.17G128300…	73
8 h	03430	Mismatch repair	34/4292	65/14423	0.000114547	0.00136638	0.00105934	Glyma.11G070700/Glyma.18G067800/Glyma.05G020600/Glyma.17G078700/Glyma.17G202200/Glyma.14G133400/Glyma.08G120900/Glyma.07G087700/Glyma.10G278800/Glyma.04G248900/Glyma.17G121400/Glyma.09G189100/Glyma.08G334900/Glyma.20G111700/Glyma.01G030600/Glyma.12G206200/Glyma.05G014200/Glyma.01G158400/Glyma.17G130800/Glyma.08G079500/Glyma.09G213500/Glyma.13G294700/Glyma.05G124300/Glyma.05G163700/Glyma.13G236400…	34
8 h	03013	RNA transport	109/4292	271/14423	0.000134069	0.00149263	0.00115723	Glyma.13G148200/Glyma.16G160800/Glyma.10G063700/Glyma.19G188700/Glyma.15G097500/Glyma.08G111800/Glyma.01G224700/Glyma.05G114900/Glyma.20G171200/Glyma.17G071100/Glyma.18G133400/Glyma.09G234100/Glyma.02G266200/Glyma.02G236700/Glyma.02G206900/Glyma.14G051300/Glyma.13G232100/Glyma.15G089800/Glyma.08G290700/Glyma.01G067900/Glyma.11G213900/Glyma.13G363900/Glyma.11G227900/Glyma.04G069100/Glyma.06G041700…	109
8 h	00190	Oxidative phosphorylation	92/4292	224/14423	0.000183183	0.00183506	0.0014227	Glyma.11G040300/Glyma.13G065400/Glyma.12G040300/Glyma.15G162600/Glyma.15G273900/Glyma.10G128100/Glyma.19G019200/Glyma.07G113500/Glyma.16G147600/Glyma.09G247100/Glyma.07G003700/Glyma.05G110100/Glyma.17G160400/Glyma.17G157000/Glyma.08G222900/Glyma.11G011200/Glyma.20G079400/Glyma.20G108500/Glyma.05G106100/Glyma.03G021800/Glyma.19G211200/Glyma.10G213400/Glyma.09G091002/Glyma.16G062100/Glyma.12G017800…	92
8 h	03012	Translation factors	100/4292	247/14423	0.000186802	0.00183506	0.0014227	Glyma.09G275000/Glyma.02G276600/Glyma.13G073200/Glyma.16G001900/Glyma.01G054000/Glyma.04G195100/Glyma.12G165301/Glyma.05G114900/Glyma.08G167900/Glyma.11G102400/Glyma.04G080800/Glyma.06G082500/Glyma.05G024200/Glyma.06G170900/Glyma.18G133400/Glyma.09G234100/Glyma.12G024800/Glyma.02G236700/Glyma.18G213900/Glyma.18G107500/Glyma.14G039100/Glyma.09G089600/Glyma.15G089800/Glyma.08G290700/Glyma.09G046000…	100
8 h	00660	C5-Branched dibasic acid metabolism	11/4292	14/14423	0.000225929	0.00206601	0.00160176	Glyma.05G167700/Glyma.13G367900/Glyma.08G210500/Glyma.14G217300/Glyma.08G126100/Glyma.11G079000/Glyma.06G169700/Glyma.15G005400/Glyma.15G072500/Glyma.13G241000/Glyma.17G256102	11
8 h	00300	Lysine biosynthesis	14/4292	20/14423	0.000235055	0.00206601	0.00160176	Glyma.16G028900/Glyma.08G063500/Glyma.09G268200/Glyma.18G221700/Glyma.07G060300/Glyma.05G240700/Glyma.03G181200/Glyma.08G047800/Glyma.19G174300/Glyma.07G185700/Glyma.03G173400/Glyma.19G182000/Glyma.08G107800/Glyma.05G151100	14
8 h	00010	Glycolysis / Gluconeogenesis	98/4292	243/14423	0.000254061	0.00212141	0.00164471	Glyma.01G118000/Glyma.13G035200/Glyma.01G116700/Glyma.14G121200/Glyma.06G122600/Glyma.05G058100/Glyma.01G024800/Glyma.07G269500/Glyma.06G032500/Glyma.05G000700/Glyma.16G173100/Glyma.06G105600/Glyma.10G041000/Glyma.03G189700/Glyma.08G199800/Glyma.18G200300/Glyma.19G078300/Glyma.18G009700/Glyma.09G126300/Glyma.18G257700/Glyma.18G137300/Glyma.06G088600/Glyma.19G000700/Glyma.13G231700/Glyma.06G208200…	98
8 h	04141	Protein processing in endoplasmic reticulum	144/4292	379/14423	0.000304146	0.00241869	0.00187519	Glyma.02G076600/Glyma.02G252800/Glyma.14G063700/Glyma.02G205600/Glyma.04G186000/Glyma.06G180000/Glyma.17G072400/Glyma.03G232000/Glyma.04G247900/Glyma.16G050800/Glyma.18G287900/Glyma.08G212000/Glyma.13G077300/Glyma.14G099900/Glyma.07G200000/Glyma.14G063800/Glyma.06G227200/Glyma.11G098300/Glyma.13G176000/Glyma.03G034100/Glyma.12G070500/Glyma.06G114800/Glyma.01G133400/Glyma.19G099900/Glyma.12G171400…	144
8 h	00196	Photosynthesis - antenna proteins	19/4292	33/14423	0.000800328	0.00607521	0.00471006	Glyma.02G305400/Glyma.16G165200/Glyma.16G165500/Glyma.13G282000/Glyma.12G219300/Glyma.08G074000/Glyma.05G128000/Glyma.14G008000/Glyma.20G212900/Glyma.16G165800/Glyma.02G309500/Glyma.16G145800/Glyma.01G115900/Glyma.03G060300/Glyma.09G154700/Glyma.08G180000/Glyma.08G082900/Glyma.15G052400/Glyma.03G262300	19
8 h	04812	Cytoskeleton proteins	118/4292	311/14423	0.00107675	0.00781815	0.00606135	Glyma.15G150100/Glyma.05G149700/Glyma.19G235300/Glyma.11G024500/Glyma.11G052200/Glyma.15G063200/Glyma.08G062500/Glyma.08G106400/Glyma.02G302800/Glyma.20G159200/Glyma.10G182800/Glyma.11G253200/Glyma.09G043100/Glyma.12G191000/Glyma.18G180900/Glyma.13G133200/Glyma.06G003900/Glyma.09G136400/Glyma.19G235400/Glyma.13G310700/Glyma.01G190000/Glyma.19G000900/Glyma.15G252800/Glyma.10G045500/Glyma.10G154200…	118
8 h	00333	Prodigiosin biosynthesis	8/4292	10/14423	0.00149382	0.0100521	0.00779331	Glyma.11G101400/Glyma.18G156100/Glyma.08G345900/Glyma.18G057700/Glyma.12G027300/Glyma.18G009200/Glyma.11G164500/Glyma.11G248000	8
8 h	00250	Alanine, aspartate and glutamate metabolism	42/4292	94/14423	0.00150481	0.0100521	0.00779331	Glyma.04G042100/Glyma.06G043000/Glyma.19G111000/Glyma.01G204600/Glyma.02G293500/Glyma.14G021000/Glyma.16G153400/Glyma.05G046900/Glyma.01G131100/Glyma.14G213300/Glyma.18G210500/Glyma.05G182600/Glyma.11G240200/Glyma.15G263500/Glyma.08G140200/Glyma.08G163700/Glyma.17G128600/Glyma.05G046700/Glyma.06G082400/Glyma.18G017200/Glyma.12G036200/Glyma.07G104500/Glyma.09G249100/Glyma.05G236000/Glyma.09G222700…	42
8 h	00061	Fatty acid biosynthesis	38/4292	85/14423	0.00243506	0.0152596	0.0118306	Glyma.14G121400/Glyma.13G038600/Glyma.19G028800/Glyma.06G112900/Glyma.13G057400/Glyma.18G265300/Glyma.11G101400/Glyma.18G156100/Glyma.07G207200/Glyma.08G345900/Glyma.15G052500/Glyma.05G129600/Glyma.18G057700/Glyma.08G179900/Glyma.08G084300/Glyma.12G027300/Glyma.02G138100/Glyma.05G221100/Glyma.18G009200/Glyma.18G243500/Glyma.09G247100/Glyma.08G349200/Glyma.11G164500/Glyma.05G216600/Glyma.09G277400…	38
8 h	03420	Nucleotide excision repair	47/4292	110/14423	0.00253379	0.0152596	0.0118306	Glyma.11G070700/Glyma.18G157402/Glyma.18G067800/Glyma.05G020600/Glyma.17G078700/Glyma.17G202200/Glyma.14G133400/Glyma.18G297400/Glyma.10G278800/Glyma.04G248900/Glyma.08G334900/Glyma.20G111700/Glyma.01G030600/Glyma.12G206200/Glyma.17G130800/Glyma.08G079500/Glyma.07G002800/Glyma.09G213500/Glyma.08G223800/Glyma.13G294700/Glyma.08G047000/Glyma.20G114700/Glyma.05G124300/Glyma.13G236400/Glyma.19G036900…	47
8 h	03020	RNA polymerase	32/4292	69/14423	0.00255849	0.0152596	0.0118306	Glyma.17G050400/Glyma.03G129500/Glyma.18G281100/Glyma.06G096400/Glyma.07G220900/Glyma.07G084000/Glyma.18G179600/Glyma.02G035900/Glyma.01G029400/Glyma.03G178900/Glyma.09G016100/Glyma.19G045500/Glyma.10G238600/Glyma.07G131200/Glyma.15G269500/Glyma.07G241200/Glyma.09G228500/Glyma.08G085100/Glyma.16G212700/Glyma.09G037400/Glyma.03G218500/Glyma.15G165300/Glyma.18G075300/Glyma.09G164200/Glyma.15G077800…	32
8 h	03110	Chaperones and folding catalysts	175/4292	494/14423	0.00329956	0.0190009	0.0147312	Glyma.02G076600/Glyma.02G252800/Glyma.14G063700/Glyma.02G205600/Glyma.15G077700/Glyma.02G187800/Glyma.12G136400/Glyma.19G096600/Glyma.16G052800/Glyma.17G072400/Glyma.03G232000/Glyma.10G195200/Glyma.20G240000/Glyma.04G247900/Glyma.18G287900/Glyma.08G212000/Glyma.13G077300/Glyma.14G099900/Glyma.07G200000/Glyma.14G063800/Glyma.13G176000/Glyma.06G114800/Glyma.07G032600/Glyma.06G054700/Glyma.11G146800…	175
8 h	02044	Secretion system	35/4292	79/14423	0.00423325	0.0235651	0.0182698	Glyma.09G171600/Glyma.13G191200/Glyma.06G227200/Glyma.03G034100/Glyma.12G070500/Glyma.01G133400/Glyma.07G106600/Glyma.12G171400/Glyma.14G053200/Glyma.12G156800/Glyma.08G336000/Glyma.13G327801/Glyma.02G258900/Glyma.02G141101/Glyma.08G284800/Glyma.12G230900/Glyma.18G071100/Glyma.13G268600/Glyma.11G155259/Glyma.05G144700/Glyma.10G032800/Glyma.15G006700/Glyma.09G232500/Glyma.08G101100/Glyma.08G346000…	35
8 h	00290	Valine, leucine and isoleucine biosynthesis	19/4292	37/14423	0.00473258	0.0254949	0.019766	Glyma.07G186000/Glyma.07G186100/Glyma.05G167700/Glyma.20G245300/Glyma.11G045300/Glyma.13G367900/Glyma.13G291300/Glyma.08G210500/Glyma.14G217300/Glyma.08G126100/Glyma.11G079000/Glyma.06G169700/Glyma.15G005400/Glyma.10G295400/Glyma.15G072500/Glyma.13G241000/Glyma.17G256102/Glyma.12G122900/Glyma.13G207900	19
8 h	04145	Phagosome	63/4292	160/14423	0.00563016	0.0293824	0.0227799	Glyma.09G192700/Glyma.12G040300/Glyma.07G084200/Glyma.20G159200/Glyma.06G227200/Glyma.07G004500/Glyma.03G034100/Glyma.12G070500/Glyma.01G133400/Glyma.12G120600/Glyma.12G171400/Glyma.04G202900/Glyma.14G053200/Glyma.12G156800/Glyma.13G327801/Glyma.06G184500/Glyma.06G162600/Glyma.02G258900/Glyma.03G074400/Glyma.08G006500/Glyma.08G205300/Glyma.05G199200/Glyma.01G109300/Glyma.17G092100/Glyma.12G230900…	63
8 h	00620	Pyruvate metabolism	66/4292	169/14423	0.00583781	0.0295429	0.0229043	Glyma.05G058100/Glyma.09G004300/Glyma.05G000700/Glyma.16G173100/Glyma.19G028800/Glyma.03G189700/Glyma.13G057400/Glyma.05G227400/Glyma.06G229900/Glyma.18G265300/Glyma.09G126300/Glyma.18G137300/Glyma.19G000700/Glyma.01G146300/Glyma.01G091000/Glyma.10G178900/Glyma.16G018300/Glyma.10G201100/Glyma.04G086300/Glyma.17G128100/Glyma.09G193800/Glyma.05G221100/Glyma.15G108400/Glyma.20G114500/Glyma.18G243500…	66
12 h	03009	Ribosome biogenesis	229/4132	469/14423	5.44289e-21	9.08963e-19	7.219e-19	Glyma.02G205600/Glyma.08G081400/Glyma.18G287900/Glyma.17G072400/Glyma.14G013102/Glyma.08G197900/Glyma.19G110900/Glyma.16G041400/Glyma.15G056100/Glyma.09G023100/Glyma.11G152600/Glyma.18G020000/Glyma.04G069900/Glyma.06G071900/Glyma.04G139900/Glyma.10G022600/Glyma.18G024200/Glyma.11G114300/Glyma.19G186600/Glyma.07G170800/Glyma.15G254100/Glyma.14G115100/Glyma.08G313100/Glyma.16G099100/Glyma.08G176900…	229
12 h	03051	03051	90/4132	164/14423	1.40767e-12	1.1754e-10	9.33506e-11	Glyma.02G205600/Glyma.18G287900/Glyma.17G072400/Glyma.06G236100/Glyma.18G297400/Glyma.07G170800/Glyma.08G332900/Glyma.17G127100/Glyma.08G013300/Glyma.01G055500/Glyma.18G074100/Glyma.14G011600/Glyma.10G295600/Glyma.18G029800/Glyma.05G079000/Glyma.03G170600/Glyma.17G252100/Glyma.14G071000/Glyma.04G078200/Glyma.08G286200/Glyma.02G302500/Glyma.07G155700/Glyma.08G223800/Glyma.18G050900/Glyma.18G206200…	90
12 h	03050	Proteasome	60/4132	105/14423	8.89959e-10	4.95411e-08	3.93456e-08	Glyma.17G127100/Glyma.10G295600/Glyma.18G029800/Glyma.05G079000/Glyma.03G170600/Glyma.17G252100/Glyma.14G071000/Glyma.04G078200/Glyma.08G286200/Glyma.07G155700/Glyma.18G050900/Glyma.18G206200/Glyma.10G043000/Glyma.04G249300/Glyma.12G147200/Glyma.16G126300/Glyma.10G279900/Glyma.09G161300/Glyma.13G031200/Glyma.06G021600/Glyma.14G073000/Glyma.04G077400/Glyma.03G262800/Glyma.11G199900/Glyma.12G117600…	60
12 h	03008	Ribosome biogenesis in eukaryotes	76/4132	147/14423	2.98991e-09	1.24829e-07	9.91392e-08	Glyma.19G110900/Glyma.16G041400/Glyma.15G056100/Glyma.11G152600/Glyma.18G020000/Glyma.04G139900/Glyma.10G022600/Glyma.11G114300/Glyma.19G186600/Glyma.08G176900/Glyma.08G013300/Glyma.02G151500/Glyma.17G115400/Glyma.14G089042/Glyma.17G029800/Glyma.07G204700/Glyma.17G128400/Glyma.07G032500/Glyma.11G142700/Glyma.05G046400/Glyma.19G165900/Glyma.04G200700/Glyma.12G223000/Glyma.16G071100/Glyma.17G233900…	76
12 h	03032	DNA replication proteins	101/4132	221/14423	4.40864e-08	1.47249e-06	1.16945e-06	Glyma.11G184100/Glyma.12G088300/Glyma.11G070700/Glyma.04G246600/Glyma.13G031500/Glyma.14G154200/Glyma.07G100600/Glyma.03G161300/Glyma.20G123000/Glyma.04G133700/Glyma.09G258700/Glyma.08G310900/Glyma.15G276000/Glyma.19G110900/Glyma.18G067800/Glyma.10G035700/Glyma.09G047300/Glyma.11G083600/Glyma.16G041400/Glyma.05G020600/Glyma.15G056100/Glyma.06G116100/Glyma.10G268100/Glyma.17G035000/Glyma.13G122100…	101
12 h	03013	RNA transport	114/4132	271/14423	1.29359e-06	3.6005e-05	2.85952e-05	Glyma.16G160800/Glyma.19G188700/Glyma.13G148200/Glyma.01G224700/Glyma.02G266200/Glyma.20G171200/Glyma.06G041700/Glyma.05G114900/Glyma.13G363900/Glyma.02G206900/Glyma.14G051300/Glyma.15G010000/Glyma.04G074200/Glyma.19G240700/Glyma.15G097500/Glyma.17G071100/Glyma.15G075100/Glyma.04G040700/Glyma.03G106500/Glyma.03G002400/Glyma.19G263400/Glyma.18G133400/Glyma.11G227900/Glyma.17G053200/Glyma.16G071100…	114
12 h	09124	Replication and repair	102/4132	241/14423	3.31532e-06	7.37623e-05	5.85821e-05	Glyma.11G184100/Glyma.12G088300/Glyma.11G070700/Glyma.02G261800/Glyma.07G100600/Glyma.03G161300/Glyma.15G092000/Glyma.13G010700/Glyma.18G067800/Glyma.09G047300/Glyma.13G220400/Glyma.09G189100/Glyma.05G020600/Glyma.U032008/Glyma.17G035000/Glyma.07G238400/Glyma.08G105600/Glyma.19G216100/Glyma.05G129700/Glyma.02G286600/Glyma.U027200/Glyma.17G078700/Glyma.08G232900/Glyma.17G104000/Glyma.15G154900/Gly…	102
12 h	03012	Translation factors	104/4132	247/14423	3.53352e-06	7.37623e-05	5.85821e-05	Glyma.09G275000/Glyma.18G107500/Glyma.16G001900/Glyma.02G276600/Glyma.05G114900/Glyma.04G080800/Glyma.13G073200/Glyma.06G082500/Glyma.09G046000/Glyma.08G167900/Glyma.12G165301/Glyma.12G024800/Glyma.08G170000/Glyma.05G041900/Glyma.15G075100/Glyma.03G106500/Glyma.04G195100/Glyma.03G002400/Glyma.15G259600/Glyma.18G133400/Glyma.11G227900/Glyma.17G053200/Glyma.09G234100/Glyma.15G257100/Glyma.02G236700…	104
12 h	03030	DNA replication	45/4132	87/14423	4.71817e-06	8.75482e-05	6.95309e-05	Glyma.11G070700/Glyma.18G067800/Glyma.09G047300/Glyma.05G020600/Glyma.17G035000/Glyma.07G238400/Glyma.08G105600/Glyma.19G216100/Glyma.05G129700/Glyma.02G286600/Glyma.17G078700/Glyma.17G104000/Glyma.15G154900/Glyma.12G039200/Glyma.11G113300/Glyma.03G219200/Glyma.17G202200/Glyma.04G248900/Glyma.14G133400/Glyma.13G156400/Glyma.08G313400/Glyma.18G009300/Glyma.06G310500/Glyma.09G213500/Glyma.08G079500…	45
12 h	00196	Photosynthesis - antenna proteins	22/4132	33/14423	6.44224e-06	0.000107585	8.54445e-05	Glyma.02G305400/Glyma.16G165200/Glyma.12G219300/Glyma.16G165500/Glyma.08G074000/Glyma.13G282000/Glyma.05G128000/Glyma.14G008000/Glyma.01G115900/Glyma.20G212900/Glyma.16G145800/Glyma.09G154700/Glyma.03G060300/Glyma.16G165800/Glyma.08G180000/Glyma.08G082900/Glyma.15G052400/Glyma.02G309500/Glyma.07G047600/Glyma.16G016100/Glyma.03G262300/Glyma.10G177200	22
12 h	00061	Fatty acid biosynthesis	43/4132	85/14423	1.5735e-05	0.000238886	0.000189723	Glyma.14G121400/Glyma.13G038600/Glyma.06G112900/Glyma.19G028800/Glyma.13G057400/Glyma.18G265300/Glyma.15G052500/Glyma.05G129600/Glyma.08G345900/Glyma.18G156100/Glyma.07G207200/Glyma.11G101400/Glyma.08G084300/Glyma.12G027300/Glyma.08G349200/Glyma.05G221100/Glyma.18G057700/Glyma.05G216600/Glyma.02G138100/Glyma.08G179900/Glyma.18G009200/Glyma.11G164500/Glyma.13G010100/Glyma.13G079900/Glyma.09G277400…	43
12 h	03060	Protein export	44/4132	90/14423	3.7397e-05	0.000520442	0.000413335	Glyma.08G284800/Glyma.06G227200/Glyma.08G025700/Glyma.03G239600/Glyma.12G156800/Glyma.12G070500/Glyma.12G171400/Glyma.05G219400/Glyma.03G034100/Glyma.01G133400/Glyma.08G336000/Glyma.05G144700/Glyma.12G230900/Glyma.08G103600/Glyma.13G268600/Glyma.10G156400/Glyma.08G025900/Glyma.08G101100/Glyma.10G156000/Glyma.14G053200/Glyma.05G146700/Glyma.19G236500/Glyma.13G327801/Glyma.02G258900/Glyma.02G254500…	44
12 h	00010	Glycolysis / Gluconeogenesis	98/4132	243/14423	5.38154e-05	0.000691321	0.000549048	Glyma.13G035200/Glyma.01G118000/Glyma.14G121200/Glyma.01G116700/Glyma.16G173100/Glyma.05G058100/Glyma.05G000700/Glyma.18G200300/Glyma.07G269500/Glyma.08G199800/Glyma.06G122600/Glyma.06G105600/Glyma.09G126300/Glyma.06G032500/Glyma.18G257700/Glyma.01G019200/Glyma.06G208200/Glyma.07G241600/Glyma.03G189700/Glyma.19G000700/Glyma.10G041000/Glyma.16G018300/Glyma.10G241000/Glyma.15G143100/Glyma.10G201100…	98
12 h	04812	Cytoskeleton proteins	120/4132	311/14423	8.62743e-05	0.00102913	0.000817335	Glyma.20G234200/Glyma.05G149700/Glyma.08G106400/Glyma.19G235300/Glyma.03G237700/Glyma.15G063200/Glyma.15G150100/Glyma.13G133200/Glyma.09G136400/Glyma.02G302800/Glyma.20G159200/Glyma.01G190000/Glyma.13G310700/Glyma.20G234100/Glyma.10G154200/Glyma.19G195300/Glyma.11G052200/Glyma.15G252800/Glyma.12G191000/Glyma.02G135700/Glyma.11G253200/Glyma.18G073500/Glyma.19G000900/Glyma.17G123400/Glyma.10G045500…	120
12 h	00620	Pyruvate metabolism	71/4132	169/14423	0.000127643	0.00142109	0.00112863	Glyma.06G229900/Glyma.16G173100/Glyma.19G028800/Glyma.13G057400/Glyma.05G058100/Glyma.05G000700/Glyma.09G004300/Glyma.18G265300/Glyma.09G126300/Glyma.01G019200/Glyma.07G241600/Glyma.03G189700/Glyma.19G000700/Glyma.05G227400/Glyma.01G146300/Glyma.16G018300/Glyma.01G091000/Glyma.15G143100/Glyma.10G201100/Glyma.10G178900/Glyma.18G137300/Glyma.10G215400/Glyma.05G221100/Glyma.04G086300/Glyma.09G193800…	71
12 h	00660	C5-Branched dibasic acid metabolism	11/4132	14/14423	0.000154964	0.00161743	0.00128457	Glyma.05G167700/Glyma.06G169700/Glyma.14G217300/Glyma.13G367900/Glyma.11G079000/Glyma.08G210500/Glyma.08G126100/Glyma.13G241000/Glyma.17G256102/Glyma.15G072500/Glyma.15G005400	11
12 h	09104	Nucleotide metabolism	94/4132	239/14423	0.000220913	0.00217015	0.00172353	Glyma.05G146000/Glyma.02G293500/Glyma.14G021000/Glyma.10G121524/Glyma.15G217500/Glyma.19G182400/Glyma.03G089400/Glyma.16G173100/Glyma.04G065800/Glyma.08G232600/Glyma.05G000700/Glyma.02G182400/Glyma.15G106200/Glyma.09G126300/Glyma.15G073000/Glyma.03G189700/Glyma.19G000700/Glyma.14G115700/Glyma.11G115200/Glyma.10G241000/Glyma.11G047900/Glyma.10G201100/Glyma.10G178900/Glyma.03G109500/Glyma.07G258900…	94
12 h	04141	Protein processing in endoplasmic reticulum	140/4132	379/14423	0.000247809	0.00229912	0.00182596	Glyma.02G076600/Glyma.02G205600/Glyma.14G063700/Glyma.02G252800/Glyma.04G186000/Glyma.18G287900/Glyma.17G072400/Glyma.06G180000/Glyma.13G077300/Glyma.04G247900/Glyma.08G212000/Glyma.03G232000/Glyma.13G176000/Glyma.20G065900/Glyma.16G012000/Glyma.07G200200/Glyma.06G227200/Glyma.16G050800/Glyma.14G063800/Glyma.04G202900/Glyma.11G146800/Glyma.08G025700/Glyma.06G114800/Glyma.12G151200/Glyma.18G094600…	140
12 h	00220	Arginine biosynthesis	28/4132	56/14423	0.000589236	0.00517907	0.00411323	Glyma.05G146000/Glyma.19G111000/Glyma.01G204600/Glyma.05G046900/Glyma.01G131100/Glyma.14G213300/Glyma.10G044300/Glyma.11G047200/Glyma.07G179700/Glyma.20G009400/Glyma.01G194700/Glyma.05G046700/Glyma.06G082400/Glyma.07G104500/Glyma.17G128600/Glyma.06G096700/Glyma.04G094600/Glyma.04G030500/Glyma.06G030600/Glyma.11G043300/Glyma.05G236000/Glyma.17G216000/Glyma.20G000500/Glyma.04G073800/Glyma.06G275700…	28
12 h	00230	Purine metabolism	68/4132	168/14423	0.000620715	0.00518297	0.00411632	Glyma.05G146000/Glyma.10G121524/Glyma.19G182400/Glyma.16G173100/Glyma.04G065800/Glyma.05G000700/Glyma.02G182400/Glyma.15G106200/Glyma.09G126300/Glyma.15G073000/Glyma.03G189700/Glyma.19G000700/Glyma.14G115700/Glyma.10G241000/Glyma.11G047900/Glyma.10G201100/Glyma.10G178900/Glyma.03G109500/Glyma.07G258900/Glyma.10G100800/Glyma.10G156900/Glyma.06G148500/Glyma.09G222700/Glyma.06G067200/Glyma.05G045200…	68
12 h	00300	Lysine biosynthesis	13/4132	20/14423	0.000784319	0.0062372	0.00495359	Glyma.08G063500/Glyma.16G028900/Glyma.09G268200/Glyma.18G221700/Glyma.07G060300/Glyma.05G240700/Glyma.03G181200/Glyma.05G151100/Glyma.08G107800/Glyma.07G185700/Glyma.19G174300/Glyma.08G047800/Glyma.19G182000	13
12 h	03430	Mismatch repair	31/4132	65/14423	0.000861833	0.0065421	0.00519574	Glyma.11G070700/Glyma.07G100600/Glyma.18G067800/Glyma.09G189100/Glyma.05G020600/Glyma.17G078700/Glyma.07G087700/Glyma.17G202200/Glyma.04G248900/Glyma.14G133400/Glyma.17G121400/Glyma.01G158400/Glyma.09G213500/Glyma.08G079500/Glyma.05G163700/Glyma.08G120900/Glyma.08G334900/Glyma.10G278800/Glyma.12G096100/Glyma.12G206200/Glyma.19G147500/Glyma.05G089100/Glyma.06G114100/Glyma.06G155300/Glyma.01G030600…	31
12 h	00333	Prodigiosin biosynthesis	8/4132	10/14423	0.00113161	0.00821645	0.00652551	Glyma.08G345900/Glyma.18G156100/Glyma.11G101400/Glyma.12G027300/Glyma.18G057700/Glyma.18G009200/Glyma.11G164500/Glyma.11G248000	8
12 h	00970	Aminoacyl-tRNA biosynthesis	36/4132	80/14423	0.00131716	0.00916523	0.00727903	Glyma.20G090100/Glyma.10G141500/Glyma.01G032500/Glyma.05G234900/Glyma.11G034100/Glyma.12G043200/Glyma.12G020700/Glyma.01G208100/Glyma.13G152678/Glyma.03G224500/Glyma.10G289600/Glyma.10G239500/Glyma.10G155000/Glyma.13G000200/Glyma.08G031100/Glyma.11G117800/Glyma.20G233300/Glyma.08G363700/Glyma.10G272800/Glyma.17G223600/Glyma.14G101500/Glyma.01G006400/Glyma.11G094300/Glyma.12G018400/Glyma.19G221400…	36
12 h	00250	Alanine, aspartate and glutamate metabolism	40/4132	94/14423	0.00265906	0.0177625	0.014107	Glyma.04G042100/Glyma.06G043000/Glyma.19G111000/Glyma.02G293500/Glyma.14G021000/Glyma.01G204600/Glyma.05G046900/Glyma.01G131100/Glyma.18G210500/Glyma.14G213300/Glyma.05G182600/Glyma.11G240200/Glyma.15G263500/Glyma.17G238200/Glyma.08G163700/Glyma.14G162300/Glyma.18G017200/Glyma.13G328600/Glyma.09G222700/Glyma.05G046700/Glyma.04G216000/Glyma.06G082400/Glyma.08G140200/Glyma.07G104500/Glyma.17G128600…	40
12 h	01007	Amino acid related enzymes	56/4132	141/14423	0.00294644	0.0183243	0.0145532	Glyma.07G186000/Glyma.07G186100/Glyma.01G131100/Glyma.18G210500/Glyma.13G295000/Glyma.05G182600/Glyma.08G063500/Glyma.06G235500/Glyma.20G090100/Glyma.11G045300/Glyma.10G141500/Glyma.06G235900/Glyma.06G082400/Glyma.08G140200/Glyma.01G032500/Glyma.05G234900/Glyma.11G034100/Glyma.12G043200/Glyma.12G020700/Glyma.01G208100/Glyma.13G152678/Glyma.03G224500/Glyma.10G289600/Glyma.10G239500/Glyma.10G155000…	56
12 h	00290	Valine, leucine and isoleucine biosynthesis	19/4132	37/14423	0.00296261	0.0183243	0.0145532	Glyma.07G186000/Glyma.07G186100/Glyma.05G167700/Glyma.06G169700/Glyma.11G045300/Glyma.20G245300/Glyma.13G291300/Glyma.14G217300/Glyma.13G367900/Glyma.11G079000/Glyma.08G210500/Glyma.08G126100/Glyma.12G122900/Glyma.13G241000/Glyma.13G207900/Glyma.10G295400/Glyma.17G256102/Glyma.15G072500/Glyma.15G005400	19
12 h	00640	Propanoate metabolism	29/4132	64/14423	0.00329172	0.01933	0.0153519	Glyma.19G028800/Glyma.13G057400/Glyma.05G058100/Glyma.18G265300/Glyma.07G241600/Glyma.15G143100/Glyma.05G221100/Glyma.18G243500/Glyma.08G027600/Glyma.04G243000/Glyma.14G102600/Glyma.18G195900/Glyma.17G032300/Glyma.04G212100/Glyma.03G056400/Glyma.05G232600/Glyma.05G062200/Glyma.18G195700/Glyma.08G040000/Glyma.10G039000/Glyma.17G005300/Glyma.17G028000/Glyma.16G044600/Glyma.09G248900/Glyma.07G268550…	29
12 h	02048	Prokaryotic defense system	12/4132	20/14423	0.00335671	0.01933	0.0153519	Glyma.11G083600/Glyma.01G007800/Glyma.20G090100/Glyma.10G141500/Glyma.04G187600/Glyma.18G089400/Glyma.08G322800/Glyma.14G017600/Glyma.03G195200/Glyma.10G071800/Glyma.02G295800/Glyma.19G194800	12
12 h	02044	Secretion system	34/4132	79/14423	0.00431052	0.0239952	0.019057	Glyma.13G191200/Glyma.08G284800/Glyma.09G171600/Glyma.06G227200/Glyma.07G106600/Glyma.12G156800/Glyma.12G070500/Glyma.12G171400/Glyma.03G034100/Glyma.01G133400/Glyma.08G336000/Glyma.05G144700/Glyma.12G230900/Glyma.13G268600/Glyma.10G156400/Glyma.08G101100/Glyma.14G053200/Glyma.13G327801/Glyma.02G258900/Glyma.15G006700/Glyma.18G071100/Glyma.08G008000/Glyma.02G036200/Glyma.05G200600/Glyma.07G029200…	34
12 h	00780	Biotin metabolism	14/4132	26/14423	0.00601555	0.0324063	0.0257372	Glyma.15G052500/Glyma.05G129600/Glyma.08G345900/Glyma.18G156100/Glyma.11G101400/Glyma.08G084300/Glyma.12G027300/Glyma.08G179900/Glyma.18G009200/Glyma.11G248000/Glyma.08G024700/Glyma.13G128000/Glyma.13G112700/Glyma.12G020600	14
12 h	03110	Chaperones and folding catalysts	167/4132	494/14423	0.00627171	0.0327305	0.0259946	Glyma.02G076600/Glyma.02G205600/Glyma.14G063700/Glyma.02G252800/Glyma.15G077700/Glyma.18G287900/Glyma.17G072400/Glyma.16G052800/Glyma.13G077300/Glyma.20G240000/Glyma.19G096600/Glyma.04G247900/Glyma.08G212000/Glyma.10G195200/Glyma.03G232000/Glyma.20G073000/Glyma.13G176000/Glyma.20G065900/Glyma.16G012000/Glyma.07G200200/Glyma.14G063800/Glyma.01G238600/Glyma.06G073300/Glyma.04G202900/Glyma.11G146800…	167
12 h	03420	Nucleotide excision repair	44/4132	110/14423	0.0067056	0.0339344	0.0269507	Glyma.11G070700/Glyma.18G067800/Glyma.05G020600/Glyma.U032008/Glyma.17G078700/Glyma.18G297400/Glyma.17G202200/Glyma.04G248900/Glyma.14G133400/Glyma.08G313400/Glyma.08G096100/Glyma.09G213500/Glyma.08G047000/Glyma.05G140800/Glyma.08G079500/Glyma.08G223800/Glyma.14G025300/Glyma.08G334900/Glyma.10G278800/Glyma.20G114700/Glyma.12G096100/Glyma.08G262900/Glyma.12G206200/Glyma.06G046400/Glyma.19G147500/G…	44
12 h	00730	Thiamine metabolism	18/4132	37/14423	0.00782187	0.0384192	0.0305125	Glyma.11G176200/Glyma.06G269700/Glyma.15G099300/Glyma.12G135000/Glyma.17G128300/Glyma.19G210300/Glyma.18G007700/Glyma.13G213500/Glyma.05G046300/Glyma.06G071300/Glyma.05G046100/Glyma.11G249500/Glyma.19G088000/Glyma.01G158800/Glyma.18G065700/Glyma.10G127400/Glyma.09G234300/Glyma.17G021800	18
16 h	03009	Ribosome biogenesis	228/4060	469/14423	1.1672e-21	1.94922e-19	1.54807e-19	Glyma.02G205600/Glyma.14G013102/Glyma.17G072400/Glyma.08G081400/Glyma.19G066600/Glyma.19G110900/Glyma.15G056100/Glyma.08G176900/Glyma.13G107200/Glyma.04G200700/Glyma.10G022600/Glyma.16G041400/Glyma.12G028500/Glyma.08G173300/Glyma.06G071900/Glyma.04G069900/Glyma.19G165900/Glyma.08G058500/Glyma.18G020000/Glyma.11G103700/Glyma.05G046400/Glyma.16G071100/Glyma.10G200300/Glyma.20G215000/Glyma.14G068600…	228
16 h	03008	Ribosome biogenesis in eukaryotes	84/4060	147/14423	1.38537e-13	1.15678e-11	9.18719e-12	Glyma.19G066600/Glyma.19G110900/Glyma.15G056100/Glyma.08G176900/Glyma.04G200700/Glyma.10G022600/Glyma.16G041400/Glyma.19G165900/Glyma.18G020000/Glyma.05G046400/Glyma.16G071100/Glyma.20G215000/Glyma.11G114300/Glyma.17G128400/Glyma.14G024600/Glyma.07G261900/Glyma.02G151500/Glyma.14G196700/Glyma.20G161600/Glyma.11G237200/Glyma.02G290200/Glyma.12G040200/Glyma.07G032500/Glyma.19G186600/Glyma.06G164800…	84
16 h	03032	DNA replication proteins	110/4060	221/14423	6.33274e-12	3.52522e-10	2.79974e-10	Glyma.11G184100/Glyma.12G088300/Glyma.11G070700/Glyma.13G031500/Glyma.04G246600/Glyma.14G154200/Glyma.18G157402/Glyma.12G148100/Glyma.03G161300/Glyma.08G310900/Glyma.19G110900/Glyma.10G035700/Glyma.15G276000/Glyma.06G116100/Glyma.04G043500/Glyma.06G043900/Glyma.15G056100/Glyma.07G034100/Glyma.08G176900/Glyma.18G067800/Glyma.08G120900/Glyma.16G041400/Glyma.06G072900/Glyma.17G104000/Glyma.20G084000…	110
16 h	03030	DNA replication	52/4060	87/14423	6.64042e-10	2.77238e-08	2.20182e-08	Glyma.11G070700/Glyma.18G157402/Glyma.18G067800/Glyma.17G104000/Glyma.05G129700/Glyma.19G216100/Glyma.17G078700/Glyma.09G047300/Glyma.10G278800/Glyma.18G009300/Glyma.07G238400/Glyma.11G113300/Glyma.04G248900/Glyma.17G035000/Glyma.17G202200/Glyma.12G039200/Glyma.05G014200/Glyma.15G154900/Glyma.02G286600/Glyma.08G334900/Glyma.14G133400/Glyma.03G219200/Glyma.08G084400/Glyma.08G079500/Glyma.20G111700…	52
16 h	03013	RNA transport	120/4060	271/14423	7.81414e-09	2.60992e-07	2.0728e-07	Glyma.16G160800/Glyma.13G148200/Glyma.19G188700/Glyma.01G224700/Glyma.05G114900/Glyma.04G040700/Glyma.16G071100/Glyma.14G051300/Glyma.06G041700/Glyma.20G171200/Glyma.17G071100/Glyma.19G240700/Glyma.04G074200/Glyma.15G010000/Glyma.03G002400/Glyma.02G206900/Glyma.15G097500/Glyma.07G117800/Glyma.18G133400/Glyma.18G280600/Glyma.03G106500/Glyma.13G363900/Glyma.09G234100/Glyma.13G232100/Glyma.05G245100…	120
16 h	09124	Replication and repair	106/4060	241/14423	8.76932e-08	2.44079e-06	1.93848e-06	Glyma.11G184100/Glyma.12G088300/Glyma.11G070700/Glyma.18G157402/Glyma.02G261800/Glyma.15G217300/Glyma.03G161300/Glyma.15G092000/Glyma.07G087700/Glyma.09G189100/Glyma.08G232900/Glyma.18G067800/Glyma.08G120900/Glyma.01G158400/Glyma.17G104000/Glyma.13G366800/Glyma.05G129700/Glyma.19G216100/Glyma.17G078700/Glyma.U027200/Glyma.17G073900/Glyma.13G010700/Glyma.09G047300/Glyma.10G278800/Glyma.18G009300/G…	106
16 h	03012	Translation factors	107/4060	247/14423	1.95242e-07	4.65792e-06	3.69933e-06	Glyma.13G073200/Glyma.16G001900/Glyma.02G276600/Glyma.01G054000/Glyma.05G114900/Glyma.09G275000/Glyma.08G114800/Glyma.20G215000/Glyma.04G080800/Glyma.12G165301/Glyma.06G170900/Glyma.03G002400/Glyma.04G195100/Glyma.18G107500/Glyma.08G170000/Glyma.07G117800/Glyma.14G039100/Glyma.09G046000/Glyma.18G133400/Glyma.03G150600/Glyma.18G280600/Glyma.06G082500/Glyma.03G106500/Glyma.09G234100/Glyma.09G089600…	107
16 h	04812	Cytoskeleton proteins	126/4060	311/14423	1.4287e-06	2.98241e-05	2.36863e-05	Glyma.05G149700/Glyma.15G150100/Glyma.03G237700/Glyma.13G310700/Glyma.20G234200/Glyma.19G235300/Glyma.10G154200/Glyma.10G149500/Glyma.12G191000/Glyma.20G159200/Glyma.11G253200/Glyma.02G302800/Glyma.08G041200/Glyma.20G207200/Glyma.13G133200/Glyma.09G136400/Glyma.02G135700/Glyma.17G123400/Glyma.01G021200/Glyma.20G234100/Glyma.10G182800/Glyma.15G252800/Glyma.15G063200/Glyma.02G296800/Glyma.08G106400…	126
16 h	00196	Photosynthesis - antenna proteins	21/4060	33/14423	2.27537e-05	0.000389751	0.000309541	Glyma.02G305400/Glyma.16G165200/Glyma.13G282000/Glyma.12G219300/Glyma.05G128000/Glyma.16G165500/Glyma.08G074000/Glyma.01G115900/Glyma.16G145800/Glyma.20G212900/Glyma.08G082900/Glyma.09G154700/Glyma.14G008000/Glyma.03G060300/Glyma.15G052400/Glyma.16G165800/Glyma.02G309500/Glyma.08G180000/Glyma.10G177200/Glyma.03G262300/Glyma.16G205200	21
16 h	03060	Protein export	44/4060	90/14423	2.33384e-05	0.000389751	0.000309541	Glyma.06G227200/Glyma.08G284800/Glyma.03G034100/Glyma.08G025700/Glyma.12G171400/Glyma.01G133400/Glyma.03G239600/Glyma.12G156800/Glyma.05G219400/Glyma.08G025900/Glyma.12G070500/Glyma.08G103600/Glyma.14G053200/Glyma.05G146700/Glyma.10G156000/Glyma.02G258900/Glyma.13G268600/Glyma.08G336000/Glyma.13G327801/Glyma.08G101100/Glyma.11G249600/Glyma.19G236500/Glyma.12G230900/Glyma.05G144700/Glyma.17G055700…	44
16 h	03430	Mismatch repair	34/4060	65/14423	3.33373e-05	0.000506121	0.000401962	Glyma.11G070700/Glyma.07G087700/Glyma.09G189100/Glyma.18G067800/Glyma.08G120900/Glyma.01G158400/Glyma.17G078700/Glyma.10G278800/Glyma.04G248900/Glyma.05G163700/Glyma.17G202200/Glyma.05G014200/Glyma.08G334900/Glyma.14G133400/Glyma.17G121400/Glyma.08G079500/Glyma.20G111700/Glyma.05G124300/Glyma.06G155300/Glyma.03G196800/Glyma.12G096100/Glyma.12G206200/Glyma.05G020600/Glyma.09G213500/Glyma.01G030600…	34
16 h	03040	Spliceosome	118/4060	310/14423	8.55848e-05	0.00119105	0.000945937	Glyma.02G205600/Glyma.17G072400/Glyma.12G239000/Glyma.20G084000/Glyma.04G208600/Glyma.17G063100/Glyma.14G196700/Glyma.15G097500/Glyma.03G152100/Glyma.07G205500/Glyma.17G115400/Glyma.07G252700/Glyma.05G149300/Glyma.19G114900/Glyma.14G025900/Glyma.11G086200/Glyma.19G196100/Glyma.19G082500/Glyma.07G130900/Glyma.06G157100/Glyma.19G101600/Glyma.05G127900/Glyma.14G188200/Glyma.02G229800/Glyma.14G068500…	118
16 h	03018	RNA degradation	77/4060	188/14423	9.82247e-05	0.00126181	0.00100213	Glyma.16G160800/Glyma.13G148200/Glyma.19G188700/Glyma.14G021500/Glyma.09G261400/Glyma.02G293100/Glyma.12G239000/Glyma.07G269500/Glyma.06G208200/Glyma.08G199800/Glyma.06G088600/Glyma.04G040700/Glyma.02G112000/Glyma.18G092700/Glyma.08G192700/Glyma.17G052100/Glyma.06G041700/Glyma.20G171200/Glyma.06G061100/Glyma.09G261100/Glyma.08G065100/Glyma.07G009600/Glyma.05G149300/Glyma.04G086900/Glyma.17G102000…	77
16 h	00220	Arginine biosynthesis	28/4060	56/14423	0.000431328	0.00488675	0.00388107	Glyma.05G146000/Glyma.01G204600/Glyma.19G111000/Glyma.05G046900/Glyma.01G131100/Glyma.14G213300/Glyma.10G044300/Glyma.11G047200/Glyma.04G073800/Glyma.07G179700/Glyma.01G194700/Glyma.06G096700/Glyma.20G009400/Glyma.17G128600/Glyma.11G043300/Glyma.07G104500/Glyma.04G094600/Glyma.20G000500/Glyma.05G046700/Glyma.05G066200/Glyma.04G030500/Glyma.06G030600/Glyma.05G236000/Glyma.17G216000/Glyma.06G275700…	28
16 h	00250	Alanine, aspartate and glutamate metabolism	42/4060	94/14423	0.00043893	0.00488675	0.00388107	Glyma.04G042100/Glyma.06G043000/Glyma.01G204600/Glyma.14G021000/Glyma.19G111000/Glyma.02G293500/Glyma.05G046900/Glyma.18G210500/Glyma.01G131100/Glyma.05G182600/Glyma.14G213300/Glyma.17G238200/Glyma.11G240200/Glyma.14G162300/Glyma.13G328600/Glyma.02G241400/Glyma.18G017200/Glyma.19G065600/Glyma.15G263500/Glyma.04G216000/Glyma.06G096700/Glyma.08G163700/Glyma.09G222700/Glyma.17G128600/Glyma.06G150000…	42
16 h	03051	03051	66/4060	164/14423	0.00053067	0.00553887	0.00439897	Glyma.02G205600/Glyma.17G072400/Glyma.06G236100/Glyma.01G055500/Glyma.18G074100/Glyma.08G223800/Glyma.14G011600/Glyma.07G155700/Glyma.08G013300/Glyma.08G332900/Glyma.05G206400/Glyma.14G071000/Glyma.02G187100/Glyma.02G302500/Glyma.04G078200/Glyma.17G253600/Glyma.18G072700/Glyma.04G181200/Glyma.04G249300/Glyma.19G172200/Glyma.18G206200/Glyma.10G279900/Glyma.08G048800/Glyma.03G170600/Glyma.17G127100…	66
16 h	00010	Glycolysis / Gluconeogenesis	92/4060	243/14423	0.000600896	0.00590292	0.00468811	Glyma.13G035200/Glyma.06G032500/Glyma.01G118000/Glyma.01G116700/Glyma.03G189700/Glyma.05G080500/Glyma.19G078300/Glyma.14G121200/Glyma.10G041000/Glyma.18G200300/Glyma.16G173100/Glyma.07G269500/Glyma.01G019200/Glyma.06G105600/Glyma.09G126300/Glyma.06G208200/Glyma.08G199800/Glyma.07G241600/Glyma.08G138100/Glyma.05G000700/Glyma.18G257700/Glyma.05G058100/Glyma.10G178900/Glyma.15G143100/Glyma.16G018300…	92
16 h	00300	Lysine biosynthesis	13/4060	20/14423	0.000651527	0.00604472	0.00480072	Glyma.08G063500/Glyma.16G028900/Glyma.09G268200/Glyma.05G240700/Glyma.07G060300/Glyma.18G221700/Glyma.05G151100/Glyma.03G181200/Glyma.08G047800/Glyma.07G185700/Glyma.08G107800/Glyma.19G182000/Glyma.19G174300	13
16 h	03420	Nucleotide excision repair	47/4060	110/14423	0.000708859	0.0062305	0.00494827	Glyma.11G070700/Glyma.18G157402/Glyma.18G067800/Glyma.17G078700/Glyma.10G278800/Glyma.04G248900/Glyma.17G202200/Glyma.08G334900/Glyma.08G223800/Glyma.14G133400/Glyma.19G036900/Glyma.08G079500/Glyma.20G111700/Glyma.05G124300/Glyma.U032008/Glyma.06G155300/Glyma.06G046400/Glyma.03G196800/Glyma.12G096100/Glyma.12G206200/Glyma.05G020600/Glyma.09G213500/Glyma.01G030600/Glyma.05G140800/Glyma.17G130800/G…	47
16 h	03410	Base excision repair	30/4060	63/14423	0.00078166	0.00631599	0.00501616	Glyma.11G184100/Glyma.12G088300/Glyma.18G157402/Glyma.15G217300/Glyma.03G161300/Glyma.08G232900/Glyma.18G067800/Glyma.13G366800/Glyma.17G073900/Glyma.08G334900/Glyma.15G265200/Glyma.06G219600/Glyma.02G203900/Glyma.08G079500/Glyma.19G149400/Glyma.05G124300/Glyma.06G155300/Glyma.10G141800/Glyma.15G013100/Glyma.11G183100/Glyma.02G191100/Glyma.12G080900/Glyma.08G313400/Glyma.06G031700/Glyma.08G313300…	30
16 h	00061	Fatty acid biosynthesis	38/4060	85/14423	0.000794226	0.00631599	0.00501616	Glyma.14G121400/Glyma.13G038600/Glyma.19G028800/Glyma.06G112900/Glyma.18G265300/Glyma.13G057400/Glyma.12G027300/Glyma.11G101400/Glyma.07G207200/Glyma.18G057700/Glyma.08G084300/Glyma.08G345900/Glyma.02G138100/Glyma.05G129600/Glyma.18G156100/Glyma.15G052500/Glyma.08G349200/Glyma.05G221100/Glyma.13G079900/Glyma.18G009200/Glyma.18G243500/Glyma.11G164500/Glyma.09G277400/Glyma.08G179900/Glyma.18G167300…	38
16 h	00333	Prodigiosin biosynthesis	8/4060	10/14423	0.00099471	0.00755075	0.00599682	Glyma.12G027300/Glyma.11G101400/Glyma.18G057700/Glyma.08G345900/Glyma.18G156100/Glyma.18G009200/Glyma.11G164500/Glyma.11G248000	8
16 h	09121	Transcription	160/4060	465/14423	0.00159931	0.0115095	0.00914087	Glyma.02G205600/Glyma.17G201200/Glyma.17G072400/Glyma.12G239000/Glyma.17G050400/Glyma.03G129500/Glyma.18G281100/Glyma.02G035900/Glyma.20G084000/Glyma.04G208600/Glyma.09G016100/Glyma.17G063100/Glyma.18G212300/Glyma.14G196700/Glyma.15G097500/Glyma.03G152100/Glyma.07G205500/Glyma.17G115400/Glyma.03G178900/Glyma.07G252700/Glyma.05G149300/Glyma.19G114900/Glyma.14G025900/Glyma.11G086200/Glyma.19G196100…	160
16 h	03050	Proteasome	44/4060	105/14423	0.00165406	0.0115095	0.00914087	Glyma.07G155700/Glyma.14G071000/Glyma.04G078200/Glyma.17G253600/Glyma.04G181200/Glyma.04G249300/Glyma.18G206200/Glyma.10G279900/Glyma.08G048800/Glyma.03G170600/Glyma.17G127100/Glyma.05G079000/Glyma.13G031200/Glyma.16G126300/Glyma.10G043000/Glyma.10G295600/Glyma.06G021600/Glyma.17G252100/Glyma.02G046900/Glyma.11G199900/Glyma.06G079600/Glyma.04G077400/Glyma.06G171200/Glyma.18G029800/Glyma.14G073000…	44
16 h	00230	Purine metabolism	65/4060	168/14423	0.00191857	0.0128161	0.0101785	Glyma.05G146000/Glyma.10G121524/Glyma.11G047900/Glyma.03G189700/Glyma.19G182400/Glyma.02G182400/Glyma.16G173100/Glyma.04G065800/Glyma.09G126300/Glyma.15G106200/Glyma.15G073000/Glyma.05G000700/Glyma.10G178900/Glyma.14G115700/Glyma.10G241000/Glyma.05G045200/Glyma.03G109500/Glyma.18G036300/Glyma.10G156900/Glyma.06G067200/Glyma.07G258900/Glyma.07G115900/Glyma.13G240500/Glyma.01G210800/Glyma.19G000700…	65
16 h	09104	Nucleotide metabolism	86/4060	239/14423	0.00479013	0.0307325	0.0244077	Glyma.05G146000/Glyma.14G021000/Glyma.10G121524/Glyma.02G293500/Glyma.15G217500/Glyma.03G089400/Glyma.11G047900/Glyma.03G189700/Glyma.19G182400/Glyma.02G182400/Glyma.08G232600/Glyma.16G173100/Glyma.04G065800/Glyma.11G115200/Glyma.09G126300/Glyma.15G106200/Glyma.15G073000/Glyma.05G000700/Glyma.10G178900/Glyma.14G115700/Glyma.10G241000/Glyma.13G328600/Glyma.05G045200/Glyma.03G109500/Glyma.18G036300…	86
16 h	00780	Biotin metabolism	14/4060	26/14423	0.00506199	0.0307325	0.0244077	Glyma.12G027300/Glyma.11G101400/Glyma.08G084300/Glyma.08G345900/Glyma.05G129600/Glyma.18G156100/Glyma.15G052500/Glyma.18G009200/Glyma.08G179900/Glyma.08G024700/Glyma.11G248000/Glyma.17G047000/Glyma.12G020600/Glyma.06G109600	14
16 h	03400	DNA repair and recombination proteins	151/4060	448/14423	0.00515275	0.0307325	0.0244077	Glyma.11G184100/Glyma.12G088300/Glyma.11G070700/Glyma.18G157402/Glyma.02G261800/Glyma.15G217300/Glyma.03G161300/Glyma.10G029000/Glyma.03G129500/Glyma.15G092000/Glyma.09G264000/Glyma.07G087700/Glyma.09G189100/Glyma.08G232900/Glyma.18G067800/Glyma.08G120900/Glyma.02G035900/Glyma.01G158400/Glyma.19G243600/Glyma.03G211900/Glyma.09G016100/Glyma.13G366800/Glyma.15G060100/Glyma.20G224100/Glyma.17G078700…	151
16 h	03440	Homologous recombination	37/4060	90/14423	0.00542744	0.0312546	0.0248224	Glyma.02G261800/Glyma.15G092000/Glyma.17G078700/Glyma.U027200/Glyma.13G010700/Glyma.10G278800/Glyma.17G202200/Glyma.05G014200/Glyma.14G133400/Glyma.13G363400/Glyma.09G070600/Glyma.11G104200/Glyma.08G079500/Glyma.20G111700/Glyma.05G124300/Glyma.04G181200/Glyma.12G029200/Glyma.06G155300/Glyma.08G339900/Glyma.03G196800/Glyma.12G206200/Glyma.05G020600/Glyma.09G213500/Glyma.01G030600/Glyma.09G103100/G…	37
16 h	04091	Lectins	12/4060	22/14423	0.00815148	0.0453766	0.0360381	Glyma.19G255000/Glyma.04G202900/Glyma.08G006500/Glyma.05G199200/Glyma.06G162600/Glyma.10G147600/Glyma.20G098400/Glyma.03G256800/Glyma.16G026200/Glyma.11G126100/Glyma.07G057200/Glyma.07G224600	12
20 h	03009	Ribosome biogenesis	270/4258	469/14423	9.40843e-38	1.5618e-35	1.20824e-35	Glyma.14G013102/Glyma.02G205600/Glyma.08G081400/Glyma.08G197900/Glyma.17G072400/Glyma.19G110900/Glyma.15G056100/Glyma.09G023100/Glyma.02G151500/Glyma.16G071100/Glyma.10G022600/Glyma.16G041400/Glyma.19G186600/Glyma.08G176900/Glyma.11G101500/Glyma.07G032500/Glyma.09G084600/Glyma.14G115100/Glyma.17G128400/Glyma.15G254100/Glyma.08G313100/Glyma.16G099100/Glyma.04G200700/Glyma.09G025000/Glyma.11G114300…	270
20 h	03008	Ribosome biogenesis in eukaryotes	92/4258	147/14423	7.69498e-17	6.38683e-15	4.94099e-15	Glyma.19G110900/Glyma.15G056100/Glyma.02G151500/Glyma.16G071100/Glyma.10G022600/Glyma.16G041400/Glyma.19G186600/Glyma.08G176900/Glyma.07G032500/Glyma.09G084600/Glyma.17G128400/Glyma.04G200700/Glyma.11G114300/Glyma.07G261900/Glyma.08G013300/Glyma.02G290200/Glyma.18G020000/Glyma.05G046400/Glyma.17G233900/Glyma.17G029800/Glyma.14G024600/Glyma.15G193000/Glyma.11G152600/Glyma.11G237200/Glyma.08G359600…	92
20 h	03013	RNA transport	137/4258	271/14423	1.95195e-13	1.08008e-11	8.35571e-12	Glyma.13G148200/Glyma.16G160800/Glyma.19G188700/Glyma.10G063700/Glyma.16G071100/Glyma.15G010000/Glyma.05G114900/Glyma.04G074200/Glyma.19G240700/Glyma.15G075100/Glyma.20G171200/Glyma.13G363900/Glyma.06G041700/Glyma.06G222100/Glyma.19G263400/Glyma.02G206900/Glyma.03G106500/Glyma.01G224700/Glyma.04G040700/Glyma.02G266200/Glyma.19G101600/Glyma.19G052400/Glyma.05G003500/Glyma.03G002400/Glyma.07G117800…	137
20 h	03051	03051	83/4258	164/14423	1.01141e-08	4.19733e-07	3.24714e-07	Glyma.02G205600/Glyma.17G072400/Glyma.06G236100/Glyma.08G013300/Glyma.18G297400/Glyma.14G036800/Glyma.08G332900/Glyma.07G170800/Glyma.18G074100/Glyma.05G206400/Glyma.02G302500/Glyma.14G011600/Glyma.11G122900/Glyma.10G295600/Glyma.08G286200/Glyma.17G127100/Glyma.11G199900/Glyma.08G048800/Glyma.04G078200/Glyma.08G337600/Glyma.01G055500/Glyma.18G050900/Glyma.18G071500/Glyma.11G227001/Glyma.08G223800…	83
20 h	03032	DNA replication proteins	103/4258	221/14423	5.02433e-08	1.66808e-06	1.29046e-06	Glyma.11G184100/Glyma.11G070700/Glyma.13G031500/Glyma.12G088300/Glyma.04G071600/Glyma.14G154200/Glyma.18G157402/Glyma.09G258700/Glyma.04G043500/Glyma.03G161300/Glyma.04G246600/Glyma.15G276000/Glyma.19G110900/Glyma.03G219200/Glyma.15G056100/Glyma.10G035700/Glyma.06G310500/Glyma.07G238400/Glyma.06G116100/Glyma.17G035000/Glyma.10G268100/Glyma.13G122100/Glyma.16G041400/Glyma.08G310900/Glyma.05G129700…	103
20 h	03012	Translation factors	112/4258	247/14423	8.34052e-08	2.30754e-06	1.78516e-06	Glyma.09G275000/Glyma.05G114900/Glyma.16G001900/Glyma.15G075100/Glyma.02G276600/Glyma.06G082500/Glyma.13G073200/Glyma.09G046000/Glyma.03G106500/Glyma.04G080800/Glyma.05G041900/Glyma.08G170000/Glyma.07G273500/Glyma.19G052400/Glyma.15G257100/Glyma.02G108900/Glyma.03G002400/Glyma.12G165301/Glyma.03G150600/Glyma.07G117800/Glyma.08G167900/Glyma.07G249900/Glyma.18G107500/Glyma.05G245100/Glyma.19G153200…	112
20 h	09124	Replication and repair	107/4258	241/14423	5.8019e-07	1.37588e-05	1.06441e-05	Glyma.11G184100/Glyma.11G070700/Glyma.12G088300/Glyma.15G092000/Glyma.18G157402/Glyma.07G087700/Glyma.03G161300/Glyma.02G261800/Glyma.U032008/Glyma.03G219200/Glyma.06G310500/Glyma.07G238400/Glyma.17G035000/Glyma.05G129700/Glyma.18G067800/Glyma.08G313400/Glyma.11G113300/Glyma.U027200/Glyma.17G104000/Glyma.09G047300/Glyma.17G078700/Glyma.05G020600/Glyma.12G039200/Glyma.01G158400/Glyma.13G010700/Gly…	107
20 h	03050	Proteasome	54/4258	105/14423	1.94096e-06	4.0275e-05	3.11575e-05	Glyma.10G295600/Glyma.08G286200/Glyma.17G127100/Glyma.11G199900/Glyma.08G048800/Glyma.04G078200/Glyma.18G050900/Glyma.18G071500/Glyma.05G079000/Glyma.06G021600/Glyma.04G249300/Glyma.03G170600/Glyma.18G029800/Glyma.10G043000/Glyma.17G252100/Glyma.14G073000/Glyma.16G126300/Glyma.05G241500/Glyma.14G221600/Glyma.13G031200/Glyma.15G087700/Glyma.12G117600/Glyma.14G071000/Glyma.09G161300/Glyma.03G262800…	54
20 h	04812	Cytoskeleton proteins	129/4258	311/14423	3.75844e-06	6.88392e-05	5.32554e-05	Glyma.05G149700/Glyma.03G237700/Glyma.17G123400/Glyma.10G154200/Glyma.12G191000/Glyma.20G159200/Glyma.13G310700/Glyma.15G150100/Glyma.20G234200/Glyma.13G133200/Glyma.11G253200/Glyma.02G135700/Glyma.10G182800/Glyma.11G052200/Glyma.02G302800/Glyma.08G106400/Glyma.19G195300/Glyma.08G041200/Glyma.09G136400/Glyma.17G038700/Glyma.19G137500/Glyma.10G045500/Glyma.01G021200/Glyma.08G062500/Glyma.08G174300…	129
20 h	03030	DNA replication	46/4258	87/14423	4.14694e-06	6.88392e-05	5.32554e-05	Glyma.11G070700/Glyma.18G157402/Glyma.03G219200/Glyma.06G310500/Glyma.07G238400/Glyma.17G035000/Glyma.05G129700/Glyma.18G067800/Glyma.08G313400/Glyma.11G113300/Glyma.17G104000/Glyma.09G047300/Glyma.17G078700/Glyma.05G020600/Glyma.12G039200/Glyma.04G248900/Glyma.08G084400/Glyma.15G154900/Glyma.19G216100/Glyma.14G025300/Glyma.13G156400/Glyma.14G133400/Glyma.01G187400/Glyma.17G202200/Glyma.02G286600…	46
20 h	00010	Glycolysis / Gluconeogenesis	103/4258	243/14423	1.16218e-05	0.000175383	0.00013568	Glyma.13G035200/Glyma.01G118000/Glyma.08G200600/Glyma.14G121200/Glyma.16G173100/Glyma.19G104100/Glyma.05G058100/Glyma.07G241600/Glyma.07G269500/Glyma.18G200300/Glyma.18G257700/Glyma.06G122600/Glyma.05G000700/Glyma.01G019200/Glyma.09G126300/Glyma.06G032500/Glyma.08G199800/Glyma.03G189700/Glyma.19G078300/Glyma.15G143100/Glyma.06G105600/Glyma.06G208200/Glyma.16G018300/Glyma.10G215400/Glyma.13G231700…	103
20 h	03040	Spliceosome	126/4258	310/14423	1.57277e-05	0.000217567	0.000168314	Glyma.02G205600/Glyma.17G072400/Glyma.07G205500/Glyma.12G239000/Glyma.15G216300/Glyma.19G101600/Glyma.09G007700/Glyma.07G252700/Glyma.19G122900/Glyma.15G097500/Glyma.07G170800/Glyma.17G105700/Glyma.04G208600/Glyma.15G007100/Glyma.02G139900/Glyma.06G231000/Glyma.11G012200/Glyma.18G266500/Glyma.13G165400/Glyma.11G199100/Glyma.17G115400/Glyma.14G025900/Glyma.20G126000/Glyma.02G288900/Glyma.10G192200…	126
20 h	02048	Prokaryotic defense system	15/4258	20/14423	3.43594e-05	0.000426028	0.000329584	Glyma.04G187600/Glyma.20G090100/Glyma.18G089400/Glyma.11G083600/Glyma.10G141500/Glyma.01G007800/Glyma.08G322800/Glyma.14G017600/Glyma.02G295800/Glyma.03G195200/Glyma.19G194800/Glyma.03G097900/Glyma.16G103500/Glyma.10G071800/Glyma.06G178200	15
20 h	00970	Aminoacyl-tRNA biosynthesis	41/4258	80/14423	3.59301e-05	0.000426028	0.000329584	Glyma.13G000200/Glyma.20G090100/Glyma.11G034100/Glyma.12G020700/Glyma.01G208100/Glyma.10G141500/Glyma.12G043200/Glyma.01G032500/Glyma.10G239500/Glyma.11G117800/Glyma.10G272800/Glyma.05G234900/Glyma.08G031100/Glyma.11G094300/Glyma.10G289600/Glyma.08G363700/Glyma.01G006400/Glyma.03G224500/Glyma.10G155000/Glyma.14G101500/Glyma.13G152678/Glyma.12G018400/Glyma.17G223600/Glyma.05G224000/Glyma.11G102100…	41
20 h	00061	Fatty acid biosynthesis	42/4258	85/14423	8.70027e-05	0.000914424	0.000707418	Glyma.14G121400/Glyma.13G038600/Glyma.06G112900/Glyma.19G028800/Glyma.13G057400/Glyma.18G265300/Glyma.08G345900/Glyma.11G101400/Glyma.18G156100/Glyma.07G207200/Glyma.08G084300/Glyma.05G129600/Glyma.05G221100/Glyma.18G057700/Glyma.08G349200/Glyma.12G027300/Glyma.15G052500/Glyma.02G138100/Glyma.13G079900/Glyma.08G179900/Glyma.09G277400/Glyma.11G164500/Glyma.18G243500/Glyma.13G010100/Glyma.08G027600…	42
20 h	04141	Protein processing in endoplasmic reticulum	146/4258	379/14423	8.81373e-05	0.000914424	0.000707418	Glyma.02G205600/Glyma.02G252800/Glyma.04G186000/Glyma.14G063700/Glyma.02G076600/Glyma.08G212000/Glyma.07G200000/Glyma.06G180000/Glyma.17G072400/Glyma.04G247900/Glyma.20G065900/Glyma.11G146800/Glyma.03G232000/Glyma.13G077300/Glyma.12G070500/Glyma.06G114800/Glyma.06G227200/Glyma.08G025700/Glyma.04G202900/Glyma.16G050800/Glyma.06G162600/Glyma.02G266900/Glyma.05G219400/Glyma.12G156800/Glyma.12G024500…	146
20 h	00250	Alanine, aspartate and glutamate metabolism	45/4258	94/14423	0.000129005	0.00125969	0.000974525	Glyma.06G043000/Glyma.19G111000/Glyma.04G042100/Glyma.01G204600/Glyma.14G021000/Glyma.02G293500/Glyma.05G046900/Glyma.16G153400/Glyma.01G131100/Glyma.18G210500/Glyma.14G162300/Glyma.11G240200/Glyma.14G213300/Glyma.05G182600/Glyma.08G163700/Glyma.18G017200/Glyma.17G128600/Glyma.09G249100/Glyma.09G222700/Glyma.15G263500/Glyma.15G045100/Glyma.13G328600/Glyma.19G065600/Glyma.06G096700/Glyma.12G036200…	45
20 h	00220	Arginine biosynthesis	30/4258	56/14423	0.000139256	0.00128425	0.000993519	Glyma.05G146000/Glyma.19G111000/Glyma.01G204600/Glyma.05G046900/Glyma.16G153400/Glyma.01G131100/Glyma.10G044300/Glyma.14G213300/Glyma.11G047200/Glyma.17G128600/Glyma.04G073800/Glyma.07G179700/Glyma.20G009400/Glyma.06G096700/Glyma.06G030600/Glyma.20G000500/Glyma.05G046700/Glyma.11G043300/Glyma.06G082400/Glyma.04G094600/Glyma.07G104500/Glyma.01G194700/Glyma.04G030500/Glyma.05G236000/Glyma.17G216000…	30
20 h	01007	Amino acid related enzymes	62/4258	141/14423	0.00017954	0.00156303	0.00120919	Glyma.07G186000/Glyma.07G186100/Glyma.01G131100/Glyma.18G210500/Glyma.08G063500/Glyma.13G000200/Glyma.06G235900/Glyma.05G182600/Glyma.20G090100/Glyma.11G034100/Glyma.12G020700/Glyma.01G208100/Glyma.10G141500/Glyma.12G043200/Glyma.01G032500/Glyma.08G140200/Glyma.06G235500/Glyma.11G045300/Glyma.10G239500/Glyma.11G117800/Glyma.10G272800/Glyma.06G082400/Glyma.05G234900/Glyma.08G031100/Glyma.11G094300…	62
20 h	00620	Pyruvate metabolism	72/4258	169/14423	0.000188317	0.00156303	0.00120919	Glyma.16G173100/Glyma.06G229900/Glyma.01G091000/Glyma.19G028800/Glyma.05G058100/Glyma.07G241600/Glyma.13G057400/Glyma.05G000700/Glyma.01G019200/Glyma.09G126300/Glyma.03G189700/Glyma.18G265300/Glyma.09G004300/Glyma.15G143100/Glyma.16G018300/Glyma.10G215400/Glyma.19G000700/Glyma.05G227400/Glyma.04G086300/Glyma.10G178900/Glyma.05G221100/Glyma.18G137300/Glyma.20G114500/Glyma.10G201100/Glyma.17G128100…	72
20 h	00660	C5-Branched dibasic acid metabolism	11/4258	14/14423	0.000208819	0.0016153	0.00124963	Glyma.05G167700/Glyma.06G169700/Glyma.14G217300/Glyma.13G367900/Glyma.08G126100/Glyma.11G079000/Glyma.13G241000/Glyma.08G210500/Glyma.15G005400/Glyma.15G072500/Glyma.17G256102	11
20 h	00300	Lysine biosynthesis	14/4258	20/14423	0.000214075	0.0016153	0.00124963	Glyma.09G268200/Glyma.08G063500/Glyma.18G221700/Glyma.16G028900/Glyma.07G060300/Glyma.05G240700/Glyma.05G151100/Glyma.03G181200/Glyma.08G107800/Glyma.19G174300/Glyma.08G047800/Glyma.07G185700/Glyma.19G182000/Glyma.03G173400	14
20 h	00290	Valine, leucine and isoleucine biosynthesis	21/4258	37/14423	0.000495426	0.00346373	0.00267962	Glyma.07G186000/Glyma.07G186100/Glyma.05G167700/Glyma.13G291300/Glyma.06G169700/Glyma.20G245300/Glyma.11G045300/Glyma.14G217300/Glyma.13G367900/Glyma.08G126100/Glyma.11G079000/Glyma.10G295400/Glyma.13G207900/Glyma.12G122900/Glyma.13G241000/Glyma.08G210500/Glyma.15G005400/Glyma.15G072500/Glyma.12G210000/Glyma.13G148600/Glyma.17G256102	21
20 h	03018	RNA degradation	77/4258	188/14423	0.000500781	0.00346373	0.00267962	Glyma.13G148200/Glyma.14G021500/Glyma.16G160800/Glyma.02G293100/Glyma.09G261400/Glyma.19G188700/Glyma.07G269500/Glyma.10G063700/Glyma.08G199800/Glyma.06G208200/Glyma.02G112000/Glyma.06G088600/Glyma.17G052100/Glyma.20G171200/Glyma.06G041700/Glyma.12G239000/Glyma.04G040700/Glyma.10G127800/Glyma.08G192700/Glyma.04G086900/Glyma.10G193200/Glyma.15G250500/Glyma.15G122400/Glyma.08G337200/Glyma.07G184300…	77
20 h	09104	Nucleotide metabolism	94/4258	239/14423	0.000676424	0.00449145	0.00347468	Glyma.05G146000/Glyma.14G021000/Glyma.15G217500/Glyma.10G121524/Glyma.02G293500/Glyma.16G173100/Glyma.19G182400/Glyma.03G089400/Glyma.08G232600/Glyma.02G182400/Glyma.04G065800/Glyma.05G000700/Glyma.09G126300/Glyma.03G189700/Glyma.11G047900/Glyma.15G073000/Glyma.01G210800/Glyma.19G000700/Glyma.14G115700/Glyma.10G178900/Glyma.15G106200/Glyma.10G241000/Glyma.11G115200/Glyma.18G036300/Glyma.10G201100…	94
20 h	03060	Protein export	41/4258	90/14423	0.000903262	0.00576698	0.00446146	Glyma.12G070500/Glyma.06G227200/Glyma.08G025700/Glyma.08G284800/Glyma.05G219400/Glyma.12G156800/Glyma.08G025900/Glyma.12G230900/Glyma.03G239600/Glyma.13G268600/Glyma.12G171400/Glyma.08G336000/Glyma.08G008000/Glyma.05G146700/Glyma.10G156000/Glyma.08G101100/Glyma.01G133400/Glyma.05G144700/Glyma.03G034100/Glyma.05G200600/Glyma.02G036200/Glyma.08G103600/Glyma.05G219600/Glyma.07G148800/Glyma.19G236500…	41
20 h	00333	Prodigiosin biosynthesis	8/4258	10/14423	0.00140962	0.00852605	0.00659593	Glyma.08G345900/Glyma.11G101400/Glyma.18G156100/Glyma.18G057700/Glyma.12G027300/Glyma.11G164500/Glyma.18G009200/Glyma.11G248000	8
20 h	03430	Mismatch repair	31/4258	65/14423	0.00148444	0.00852605	0.00659593	Glyma.11G070700/Glyma.07G087700/Glyma.18G067800/Glyma.17G078700/Glyma.05G020600/Glyma.01G158400/Glyma.17G121400/Glyma.04G248900/Glyma.08G120900/Glyma.14G133400/Glyma.17G202200/Glyma.09G213500/Glyma.05G163700/Glyma.09G189100/Glyma.06G114100/Glyma.12G096100/Glyma.08G079500/Glyma.19G147500/Glyma.17G130800/Glyma.05G089100/Glyma.05G014200/Glyma.19G216000/Glyma.10G019200/Glyma.12G080900/Glyma.08G334900…	31
20 h	00230	Purine metabolism	68/4258	168/14423	0.00148949	0.00852605	0.00659593	Glyma.05G146000/Glyma.10G121524/Glyma.16G173100/Glyma.19G182400/Glyma.02G182400/Glyma.04G065800/Glyma.05G000700/Glyma.09G126300/Glyma.03G189700/Glyma.11G047900/Glyma.15G073000/Glyma.01G210800/Glyma.19G000700/Glyma.14G115700/Glyma.10G178900/Glyma.15G106200/Glyma.10G241000/Glyma.18G036300/Glyma.10G201100/Glyma.07G258900/Glyma.10G156900/Glyma.10G100800/Glyma.09G222700/Glyma.10G227800/Glyma.03G109500…	68
20 h	03420	Nucleotide excision repair	47/4258	110/14423	0.00212465	0.0117564	0.00909498	Glyma.11G070700/Glyma.18G157402/Glyma.U032008/Glyma.18G067800/Glyma.08G313400/Glyma.17G078700/Glyma.05G020600/Glyma.04G248900/Glyma.14G025300/Glyma.14G133400/Glyma.18G297400/Glyma.17G202200/Glyma.08G096100/Glyma.09G213500/Glyma.06G114100/Glyma.12G096100/Glyma.08G079500/Glyma.19G147500/Glyma.17G130800/Glyma.05G089100/Glyma.08G223800/Glyma.05G140800/Glyma.13G371600/Glyma.06G046400/Glyma.10G275100/G…	47
20 h	00196	Photosynthesis - antenna proteins	18/4258	33/14423	0.00228507	0.0122362	0.00946615	Glyma.02G305400/Glyma.16G165200/Glyma.16G165500/Glyma.13G282000/Glyma.12G219300/Glyma.05G128000/Glyma.08G074000/Glyma.16G165800/Glyma.14G008000/Glyma.16G145800/Glyma.01G115900/Glyma.20G212900/Glyma.09G154700/Glyma.08G082900/Glyma.03G060300/Glyma.15G052400/Glyma.02G309500/Glyma.08G180000	18
20 h	03016	Transfer RNA biogenesis	111/4258	299/14423	0.00258207	0.0133945	0.0103623	Glyma.02G107900/Glyma.16G071100/Glyma.13G000200/Glyma.05G114900/Glyma.05G121000/Glyma.19G240700/Glyma.08G075600/Glyma.20G090100/Glyma.09G175800/Glyma.08G090700/Glyma.11G034100/Glyma.19G263400/Glyma.12G020700/Glyma.07G101300/Glyma.01G208100/Glyma.16G165400/Glyma.10G141500/Glyma.12G043200/Glyma.01G032500/Glyma.17G108000/Glyma.06G142400/Glyma.02G266200/Glyma.19G052400/Glyma.16G139800/Glyma.10G239500…	111
20 h	03410	Base excision repair	29/4258	63/14423	0.00400952	0.0201691	0.0156032	Glyma.11G184100/Glyma.12G088300/Glyma.18G157402/Glyma.03G161300/Glyma.18G067800/Glyma.08G313400/Glyma.14G025300/Glyma.13G366800/Glyma.07G059700/Glyma.08G079500/Glyma.15G265200/Glyma.19G147500/Glyma.02G191100/Glyma.17G073900/Glyma.20G090300/Glyma.02G203900/Glyma.U031407/Glyma.10G141800/Glyma.04G031600/Glyma.02G289700/Glyma.16G218700/Glyma.06G219600/Glyma.12G080900/Glyma.08G334900/Glyma.12G231200/G…	29
20 h	03110	Chaperones and folding catalysts	172/4258	494/14423	0.00549215	0.0268146	0.0207443	Glyma.02G205600/Glyma.02G252800/Glyma.14G063700/Glyma.02G076600/Glyma.15G077700/Glyma.08G212000/Glyma.07G200000/Glyma.19G096600/Glyma.16G052800/Glyma.10G195200/Glyma.17G072400/Glyma.20G240000/Glyma.02G187800/Glyma.06G073300/Glyma.04G247900/Glyma.20G065900/Glyma.11G146800/Glyma.03G232000/Glyma.13G077300/Glyma.06G114800/Glyma.08G025700/Glyma.03G129600/Glyma.04G202900/Glyma.12G210100/Glyma.06G162600…	172
20 h	02044	Secretion system	34/4258	79/14423	0.00717497	0.0340299	0.0263262	Glyma.09G171600/Glyma.12G070500/Glyma.06G227200/Glyma.13G191200/Glyma.08G284800/Glyma.12G156800/Glyma.07G106600/Glyma.12G230900/Glyma.05G048400/Glyma.13G268600/Glyma.12G171400/Glyma.08G336000/Glyma.08G008000/Glyma.08G101100/Glyma.01G133400/Glyma.05G144700/Glyma.03G034100/Glyma.05G200600/Glyma.02G036200/Glyma.12G010300/Glyma.14G053200/Glyma.15G006700/Glyma.18G071100/Glyma.13G327801/Glyma.15G183400…	34
